# Supplementary material for: Cross-talk of RNA modification "writers" describes tumor stemness and microenvironment and guides personalized immunotherapy for gastric cancer
Source: Aging (Albany NY). 2023 Jun 14;15(12):5445–81. doi: 10.18632/aging.204802 (PMC10333070; doi:10.18632/aging.204802)
Supplement: Supplementary Table 2 [file aging-15-204802-s003.xlsx]

## Sheet: Sheet1
Supplementary Table 2. The mutation co-occurrence and exclusion analysis for the 26 RNA modification “writers”.
gene1	gene2	Event	pair	pValue	oddsRatio
ADARB1	KIAA1429	Co_Occurence	ADARB1, KIAA1429	9.67087e-05	17.7455
ADARB1	ZC3H13	Co_Occurence	ADARB1, ZC3H13	0.00017396	11.8397
PCF11	RBM15	Co_Occurence	PCF11, RBM15	0.000230922	22.2362
ZC3H13	CFI	Co_Occurence	CFI, ZC3H13	0.000451657	9.18267
RBM15	CSTF3	Co_Occurence	CSTF3, RBM15	0.000696738	28.7555
ADARB2	PCF11	Co_Occurence	ADARB2, PCF11	0.000778089	30.8176
CPSF1	RBM15B	Co_Occurence	CPSF1, RBM15B	0.000848106	14.2683
RBM15B	CSTF1	Co_Occurence	CSTF1, RBM15B	0.00125053	22.3849
PCF11	CFI	Co_Occurence	CFI, PCF11	0.00133923	12.1065
ZC3H13	CSTF2	Co_Occurence	CSTF2, ZC3H13	0.00168505	37.6365
ZC3H13	KIAA1429	Co_Occurence	KIAA1429, ZC3H13	0.00193929	6.31052
ADAR	KIAA1429	Co_Occurence	ADAR, KIAA1429	0.00202071	10.6183
ADAR	RBM15	Co_Occurence	ADAR, RBM15	0.0028379	15.7084
PCF11	KIAA1429	Co_Occurence	KIAA1429, PCF11	0.00346995	8.82443
RBM15B	CLP1	Co_Occurence	CLP1, RBM15B	0.00410407	40.0487
PCF11	CPSF2	Co_Occurence	CPSF2, PCF11	0.0042588	13.2704
ZC3H13	CPSF2	Co_Occurence	CPSF2, ZC3H13	0.00477563	8.63916
KIAA1429	CSTF1	Co_Occurence	CSTF1, KIAA1429	0.00511176	12.5337
KIAA1429	CSTF3	Co_Occurence	CSTF3, KIAA1429	0.00511176	12.5337
PCF11	ZC3H13	Co_Occurence	PCF11, ZC3H13	0.00517158	6.03384
CLP1	ADAR	Co_Occurence	ADAR, CLP1	0.00562319	33.4462
CPSF4	ZC3H13	Co_Occurence	CPSF4, ZC3H13	0.0059982	Inf
RBM15B	CFI	Co_Occurence	CFI, RBM15B	0.0061564	11.18
RBM15	KIAA1429	Co_Occurence	KIAA1429, RBM15	0.00709888	10.7379
ADARB1	CFI	Co_Occurence	ADARB1, CFI	0.00783525	10.0529
KIAA1429	CLP1	Co_Occurence	CLP1, KIAA1429	0.0104011	23.6
ADAR	PCF11	Co_Occurence	ADAR, PCF11	0.0117837	8.41373
RBM15B	KIAA1429	Co_Occurence	KIAA1429, RBM15B	0.0122991	8.33701
NUDT21	ADARB2	Co_Occurence	ADARB2, NUDT21	0.0138568	Inf
TRMT10C	KIAA1429	Co_Occurence	KIAA1429, TRMT10C	0.0168809	15.789
ADAR	ZC3H13	Co_Occurence	ADAR, ZC3H13	0.0181047	5.15057
WTAP	CPSF4	Co_Occurence	CPSF4, WTAP	0.0184116	123.68
RBM15	CPSF2	Co_Occurence	CPSF2, RBM15	0.0195975	12.7204
ADARB2	CPSF1	Co_Occurence	ADARB2, CPSF1	0.0222026	12.6168
CFI	KIAA1429	Co_Occurence	CFI, KIAA1429	0.0233696	6.22362
ADARB1	CSTF1	Co_Occurence	ADARB1, CSTF1	0.0266292	10.556
ADARB1	CSTF3	Co_Occurence	ADARB1, CSTF3	0.0266292	10.556
ZC3H13	CSTF1	Co_Occurence	CSTF1, ZC3H13	0.0268475	6.28564
ZC3H13	CSTF3	Co_Occurence	CSTF3, ZC3H13	0.0268475	6.28564
CPSF4	PABPN1	Co_Occurence	CPSF4, PABPN1	0.0275532	77.836
ADAR	CSTF3	Co_Occurence	ADAR, CSTF3	0.0307298	9.66801
WTAP	ZC3H13	Co_Occurence	WTAP, ZC3H13	0.0325228	12.2352
CFI	CSTF3	Co_Occurence	CFI, CSTF3	0.0350721	8.91129
PCF11	NUDT21	Co_Occurence	NUDT21, PCF11	0.0369515	Inf
CPSF2	ADAR	Co_Occurence	ADAR, CPSF2	0.0377028	8.45227
CPSF3	CSTF3	Co_Occurence	CPSF3, CSTF3	0.0411855	49.9108
NUDT21	KIAA1429	Co_Occurence	KIAA1429, NUDT21	0.0438799	Inf
CSTF2	TRMT10C	Co_Occurence	CSTF2, TRMT10C	0.0455508	33.6375
CPSF2	METTL3	Co_Occurence	CPSF2, METTL3	0.0457082	44.5357
ADAR	RBM15B	Co_Occurence	ADAR, RBM15B	0.0532761	6.74614
CSTF2	ADARB2	Co_Occurence	ADARB2, CSTF2	0.0544709	27.091
CLP1	PABPN1	Co_Occurence	CLP1, PABPN1	0.0544709	27.091
RBM15B	METTL3	Co_Occurence	METTL3, RBM15B	0.0547216	36.5942
CPSF1	RBM15	Co_Occurence	CPSF1, RBM15	0.0603066	6.30003
RBM15B	PCF11	Co_Occurence	PCF11, RBM15B	0.0681064	5.76308
CPSF3	CFI	Co_Occurence	CFI, CPSF3	0.0681614	28.8327
ADARB2	ZC3H13	Co_Occurence	ADARB2, ZC3H13	0.073551	6.11958
CFI	ADAR	Co_Occurence	ADAR, CFI	0.0801623	5.1653
CLP1	CSTF1	Co_Occurence	CLP1, CSTF1	0.0808563	17.0746
CSTF2	CSTF1	Co_Occurence	CSTF1, CSTF2	0.0808563	17.0746
CLP1	CSTF3	Co_Occurence	CLP1, CSTF3	0.0808563	17.0746
CPSF4	CPSF1	Co_Occurence	CPSF1, CPSF4	0.081505	23.696
METTL3	CPSF1	Co_Occurence	CPSF1, METTL3	0.081505	23.696
CPSF2	CLP1	Co_Occurence	CLP1, CPSF2	0.0895275	15.1886
RBM15	CLP1	Co_Occurence	CLP1, RBM15	0.0895275	15.1886
TRMT10C	CSTF1	Co_Occurence	CSTF1, TRMT10C	0.100139	12.8487
CPSF1	ADAR	Co_Occurence	ADAR, CPSF1	0.110493	4.17228
ADARB2	CSTF3	Co_Occurence	ADARB2, CSTF3	0.119061	10.294
ADAR	CSTF2	Co_Occurence	ADAR, CSTF2	0.1236	10.4908
ADAR	TRMT6	Co_Occurence	ADAR, TRMT6	0.1236	10.4908
CFI	CPSF1	Co_Occurence	CFI, CPSF1	0.124399	3.84414
KIAA1429	METTL14	Co_Occurence	KIAA1429, METTL14	0.126227	11.2576
RBM15	ADARB2	Co_Occurence	ADARB2, RBM15	0.131527	9.15104
CPSF2	PABPN1	Co_Occurence	CPSF2, PABPN1	0.131527	9.15104
RBM15	PABPN1	Co_Occurence	PABPN1, RBM15	0.131527	9.15104
RBM15B	TRMT10C	Co_Occurence	RBM15B, TRMT10C	0.131673	9.33434
CLP1	CFI	Co_Occurence	CFI, CLP1	0.131967	9.7313
CLP1	PCF11	Co_Occurence	CLP1, PCF11	0.140273	9.07075
TRMT6	PCF11	Co_Occurence	PCF11, TRMT6	0.140273	9.07075
ZC3H13	CPSF3	Co_Occurence	CPSF3, ZC3H13	0.151046	11.897
ZC3H13	METTL3	Co_Occurence	METTL3, ZC3H13	0.151046	11.897
TRMT10C	ADAR	Co_Occurence	ADAR, TRMT10C	0.152201	7.88105
CPSF1	WTAP	Co_Occurence	CPSF1, WTAP	0.156707	7.98045
KIAA1429	CSTF2	Co_Occurence	CSTF2, KIAA1429	0.164835	7.52508
ADAR	ADARB2	Co_Occurence	ADAR, ADARB2	0.179932	6.30478
ADAR	PABPN1	Co_Occurence	ADAR, PABPN1	0.179932	6.30478
ZC3H13	RBM15	Co_Occurence	RBM15, ZC3H13	0.181153	3.04251
CPSF1	KIAA1429	Co_Occurence	CPSF1, KIAA1429	0.183728	2.91512
CFI	ADARB2	Co_Occurence	ADARB2, CFI	0.191676	5.84453
CFI	PABPN1	Co_Occurence	CFI, PABPN1	0.191676	5.84453
TRMT10C	CPSF1	Co_Occurence	CPSF1, TRMT10C	0.19209	5.98734
METTL14	ZC3H13	Co_Occurence	METTL14, ZC3H13	0.218017	5.96538
RBM15B	CSTF3	Co_Occurence	CSTF3, RBM15B	0.225351	4.65816
CPSF1	PABPN1	Co_Occurence	CPSF1, PABPN1	0.226068	4.7878
KIAA1429	ADARB2	Co_Occurence	ADARB2, KIAA1429	0.237257	4.51364
RBM15B	ZC3H13	Co_Occurence	RBM15B, ZC3H13	0.241153	2.4242
RBM15B	RBM15	Co_Occurence	RBM15, RBM15B	0.247275	4.13513
CSTF1	ADAR	Co_Occurence	ADAR, CSTF1	0.258156	3.92847
RBM15	ADARB1	Co_Occurence	ADARB1, RBM15	0.265155	3.78408
CSTF1	CFI	Co_Occurence	CFI, CSTF1	0.274091	3.6406
ZC3H13	TRMT6	Co_Occurence	TRMT6, ZC3H13	0.279848	3.9783
PCF11	CSTF1	Co_Occurence	CSTF1, PCF11	0.289721	3.39152
PCF11	CSTF3	Co_Occurence	CSTF3, PCF11	0.289721	3.39152
RBM15	CFI	Co_Occurence	CFI, RBM15	0.299772	3.23097
RBM15B	ADARB1	Co_Occurence	ADARB1, RBM15B	0.30968	3.08496
CPSF1	CSTF1	Co_Occurence	CPSF1, CSTF1	0.320085	2.98029
CPSF1	CSTF3	Co_Occurence	CPSF1, CSTF3	0.320085	2.98029
TRMT10C	ZC3H13	Co_Occurence	TRMT10C, ZC3H13	0.336923	2.98067
CPSF2	KIAA1429	Co_Occurence	CPSF2, KIAA1429	0.364638	2.49205
ZC3H13	PABPN1	Co_Occurence	PABPN1, ZC3H13	0.389597	2.38106
ADARB1	PCF11	Co_Occurence	ADARB1, PCF11	0.391355	2.24402
CPSF1	ADARB1	Co_Occurence	ADARB1, CPSF1	0.428757	1.97132
CPSF1	PCF11	Co_Occurence	CPSF1, PCF11	0.49926	1.56664
CLP1	CPSF1	Mutually_Exclusive	CLP1, CPSF1	1	0
CSTF2	CPSF1	Mutually_Exclusive	CPSF1, CSTF2	1	0
TRMT6	CPSF1	Mutually_Exclusive	CPSF1, TRMT6	1	0
PABPN1	PCF11	Mutually_Exclusive	PABPN1, PCF11	1	0
WTAP	ADAR	Mutually_Exclusive	ADAR, WTAP	1	0
METTL14	ADARB1	Mutually_Exclusive	ADARB1, METTL14	1	0
TRMT61B	ADARB1	Mutually_Exclusive	ADARB1, TRMT61B	1	0
CLP1	TRMT10C	Mutually_Exclusive	CLP1, TRMT10C	1	0
TRMT6	TRMT10C	Mutually_Exclusive	TRMT10C, TRMT6	1	0
WTAP	TRMT10C	Mutually_Exclusive	TRMT10C, WTAP	1	0
ADARB2	METTL14	Mutually_Exclusive	ADARB2, METTL14	1	0
PABPN1	METTL14	Mutually_Exclusive	METTL14, PABPN1	1	0
ADARB2	TRMT61B	Mutually_Exclusive	ADARB2, TRMT61B	1	0
PABPN1	TRMT61B	Mutually_Exclusive	PABPN1, TRMT61B	1	0
PCF11	CPSF3	Mutually_Exclusive	CPSF3, PCF11	1	0
PCF11	CPSF4	Mutually_Exclusive	CPSF4, PCF11	1	0
PCF11	METTL3	Mutually_Exclusive	METTL3, PCF11	1	0
ADAR	NUDT21	Mutually_Exclusive	ADAR, NUDT21	1	0
ZC3H13	CPSF1	Mutually_Exclusive	CPSF1, ZC3H13	1	0.681448
ADARB1	ADAR	Mutually_Exclusive	ADAR, ADARB1	1	0
ADARB2	ADARB1	Mutually_Exclusive	ADARB1, ADARB2	1	0
PABPN1	ADARB1	Mutually_Exclusive	ADARB1, PABPN1	1	0
CPSF2	RBM15B	Mutually_Exclusive	CPSF2, RBM15B	1	0
CPSF3	RBM15B	Mutually_Exclusive	CPSF3, RBM15B	1	0
CPSF4	RBM15B	Mutually_Exclusive	CPSF4, RBM15B	1	0
CPSF1	CPSF2	Mutually_Exclusive	CPSF1, CPSF2	1	0
CSTF1	CPSF2	Mutually_Exclusive	CPSF2, CSTF1	1	0
CSTF3	CPSF2	Mutually_Exclusive	CPSF2, CSTF3	1	0
CSTF1	RBM15	Mutually_Exclusive	CSTF1, RBM15	1	0
NUDT21	TRMT10C	Mutually_Exclusive	NUDT21, TRMT10C	1	0
PCF11	CSTF2	Mutually_Exclusive	CSTF2, PCF11	1	0
CSTF3	CSTF2	Mutually_Exclusive	CSTF2, CSTF3	1	0
CSTF1	TRMT6	Mutually_Exclusive	CSTF1, TRMT6	1	0
CSTF3	TRMT6	Mutually_Exclusive	CSTF3, TRMT6	1	0
PCF11	WTAP	Mutually_Exclusive	PCF11, WTAP	1	0
CSTF1	WTAP	Mutually_Exclusive	CSTF1, WTAP	1	0
CSTF3	WTAP	Mutually_Exclusive	CSTF3, WTAP	1	0
CFI	METTL14	Mutually_Exclusive	CFI, METTL14	1	0
RBM15B	METTL14	Mutually_Exclusive	METTL14, RBM15B	1	0
TRMT10C	METTL14	Mutually_Exclusive	METTL14, TRMT10C	1	0
CLP1	METTL14	Mutually_Exclusive	CLP1, METTL14	1	0
CSTF2	METTL14	Mutually_Exclusive	CSTF2, METTL14	1	0
TRMT6	METTL14	Mutually_Exclusive	METTL14, TRMT6	1	0
WTAP	METTL14	Mutually_Exclusive	METTL14, WTAP	1	0
CFI	TRMT61B	Mutually_Exclusive	CFI, TRMT61B	1	0
RBM15B	TRMT61B	Mutually_Exclusive	RBM15B, TRMT61B	1	0
TRMT10C	TRMT61B	Mutually_Exclusive	TRMT10C, TRMT61B	1	0
CLP1	TRMT61B	Mutually_Exclusive	CLP1, TRMT61B	1	0
CSTF2	TRMT61B	Mutually_Exclusive	CSTF2, TRMT61B	1	0
TRMT6	TRMT61B	Mutually_Exclusive	TRMT6, TRMT61B	1	0
WTAP	TRMT61B	Mutually_Exclusive	TRMT61B, WTAP	1	0
CPSF1	CPSF3	Mutually_Exclusive	CPSF1, CPSF3	1	0
CSTF1	CPSF3	Mutually_Exclusive	CPSF3, CSTF1	1	0
METTL14	CPSF3	Mutually_Exclusive	CPSF3, METTL14	1	0
TRMT61B	CPSF3	Mutually_Exclusive	CPSF3, TRMT61B	1	0
NUDT21	CPSF3	Mutually_Exclusive	CPSF3, NUDT21	1	0
CSTF1	CPSF4	Mutually_Exclusive	CPSF4, CSTF1	1	0
CSTF3	CPSF4	Mutually_Exclusive	CPSF4, CSTF3	1	0
METTL14	CPSF4	Mutually_Exclusive	CPSF4, METTL14	1	0
TRMT61B	CPSF4	Mutually_Exclusive	CPSF4, TRMT61B	1	0
NUDT21	CPSF4	Mutually_Exclusive	CPSF4, NUDT21	1	0
CSTF1	METTL3	Mutually_Exclusive	CSTF1, METTL3	1	0
CSTF3	METTL3	Mutually_Exclusive	CSTF3, METTL3	1	0
METTL14	METTL3	Mutually_Exclusive	METTL14, METTL3	1	0
TRMT61B	METTL3	Mutually_Exclusive	METTL3, TRMT61B	1	0
NUDT21	METTL3	Mutually_Exclusive	METTL3, NUDT21	1	0
ZC3H13	NUDT21	Mutually_Exclusive	NUDT21, ZC3H13	1	0
CLP1	ZC3H13	Mutually_Exclusive	CLP1, ZC3H13	1	0
TRMT61B	ZC3H13	Mutually_Exclusive	TRMT61B, ZC3H13	1	0
PABPN1	KIAA1429	Mutually_Exclusive	KIAA1429, PABPN1	1	0
TRMT6	KIAA1429	Mutually_Exclusive	KIAA1429, TRMT6	1	0
WTAP	KIAA1429	Mutually_Exclusive	KIAA1429, WTAP	1	0
TRMT61B	KIAA1429	Mutually_Exclusive	KIAA1429, TRMT61B	1	0
CPSF3	KIAA1429	Mutually_Exclusive	CPSF3, KIAA1429	1	0
CPSF4	KIAA1429	Mutually_Exclusive	CPSF4, KIAA1429	1	0
METTL3	KIAA1429	Mutually_Exclusive	KIAA1429, METTL3	1	0
METTL14	CPSF1	Mutually_Exclusive	CPSF1, METTL14	1	0
TRMT61B	CPSF1	Mutually_Exclusive	CPSF1, TRMT61B	1	0
NUDT21	CPSF1	Mutually_Exclusive	CPSF1, NUDT21	1	0
TRMT10C	PCF11	Mutually_Exclusive	PCF11, TRMT10C	1	0
METTL14	PCF11	Mutually_Exclusive	METTL14, PCF11	1	0
TRMT61B	PCF11	Mutually_Exclusive	PCF11, TRMT61B	1	0
CPSF2	CFI	Mutually_Exclusive	CFI, CPSF2	1	0
TRMT10C	CFI	Mutually_Exclusive	CFI, TRMT10C	1	0
CSTF2	CFI	Mutually_Exclusive	CFI, CSTF2	1	0
TRMT6	CFI	Mutually_Exclusive	CFI, TRMT6	1	0
WTAP	CFI	Mutually_Exclusive	CFI, WTAP	1	0
CPSF4	CFI	Mutually_Exclusive	CFI, CPSF4	1	0
METTL3	CFI	Mutually_Exclusive	CFI, METTL3	1	0
NUDT21	CFI	Mutually_Exclusive	CFI, NUDT21	1	0
METTL14	ADAR	Mutually_Exclusive	ADAR, METTL14	1	0
TRMT61B	ADAR	Mutually_Exclusive	ADAR, TRMT61B	1	0
CPSF3	ADAR	Mutually_Exclusive	ADAR, CPSF3	1	0
CPSF4	ADAR	Mutually_Exclusive	ADAR, CPSF4	1	0
METTL3	ADAR	Mutually_Exclusive	ADAR, METTL3	1	0
CPSF2	ADARB1	Mutually_Exclusive	ADARB1, CPSF2	1	0
TRMT10C	ADARB1	Mutually_Exclusive	ADARB1, TRMT10C	1	0
CLP1	ADARB1	Mutually_Exclusive	ADARB1, CLP1	1	0
CSTF2	ADARB1	Mutually_Exclusive	ADARB1, CSTF2	1	0
TRMT6	ADARB1	Mutually_Exclusive	ADARB1, TRMT6	1	0
WTAP	ADARB1	Mutually_Exclusive	ADARB1, WTAP	1	0
CPSF3	ADARB1	Mutually_Exclusive	ADARB1, CPSF3	1	0
CPSF4	ADARB1	Mutually_Exclusive	ADARB1, CPSF4	1	0
METTL3	ADARB1	Mutually_Exclusive	ADARB1, METTL3	1	0
NUDT21	ADARB1	Mutually_Exclusive	ADARB1, NUDT21	1	0
ADARB2	RBM15B	Mutually_Exclusive	ADARB2, RBM15B	1	0
PABPN1	RBM15B	Mutually_Exclusive	PABPN1, RBM15B	1	0
CSTF2	RBM15B	Mutually_Exclusive	CSTF2, RBM15B	1	0
TRMT6	RBM15B	Mutually_Exclusive	RBM15B, TRMT6	1	0
WTAP	RBM15B	Mutually_Exclusive	RBM15B, WTAP	1	0
NUDT21	RBM15B	Mutually_Exclusive	NUDT21, RBM15B	1	0
ADARB2	CPSF2	Mutually_Exclusive	ADARB2, CPSF2	1	0
TRMT10C	CPSF2	Mutually_Exclusive	CPSF2, TRMT10C	1	0
CSTF2	CPSF2	Mutually_Exclusive	CPSF2, CSTF2	1	0
TRMT6	CPSF2	Mutually_Exclusive	CPSF2, TRMT6	1	0
WTAP	CPSF2	Mutually_Exclusive	CPSF2, WTAP	1	0
METTL14	CPSF2	Mutually_Exclusive	CPSF2, METTL14	1	0
TRMT61B	CPSF2	Mutually_Exclusive	CPSF2, TRMT61B	1	0
CPSF3	CPSF2	Mutually_Exclusive	CPSF2, CPSF3	1	0
CPSF4	CPSF2	Mutually_Exclusive	CPSF2, CPSF4	1	0
NUDT21	CPSF2	Mutually_Exclusive	CPSF2, NUDT21	1	0
TRMT10C	RBM15	Mutually_Exclusive	RBM15, TRMT10C	1	0
CSTF2	RBM15	Mutually_Exclusive	CSTF2, RBM15	1	0
TRMT6	RBM15	Mutually_Exclusive	RBM15, TRMT6	1	0
WTAP	RBM15	Mutually_Exclusive	RBM15, WTAP	1	0
METTL14	RBM15	Mutually_Exclusive	METTL14, RBM15	1	0
TRMT61B	RBM15	Mutually_Exclusive	RBM15, TRMT61B	1	0
CPSF3	RBM15	Mutually_Exclusive	CPSF3, RBM15	1	0
CPSF4	RBM15	Mutually_Exclusive	CPSF4, RBM15	1	0
METTL3	RBM15	Mutually_Exclusive	METTL3, RBM15	1	0
NUDT21	RBM15	Mutually_Exclusive	NUDT21, RBM15	1	0
CSTF3	CSTF1	Mutually_Exclusive	CSTF1, CSTF3	1	0
ADARB2	CSTF1	Mutually_Exclusive	ADARB2, CSTF1	1	0
PABPN1	CSTF1	Mutually_Exclusive	CSTF1, PABPN1	1	0
METTL14	CSTF1	Mutually_Exclusive	CSTF1, METTL14	1	0
TRMT61B	CSTF1	Mutually_Exclusive	CSTF1, TRMT61B	1	0
NUDT21	CSTF1	Mutually_Exclusive	CSTF1, NUDT21	1	0
PABPN1	CSTF3	Mutually_Exclusive	CSTF3, PABPN1	1	0
TRMT10C	CSTF3	Mutually_Exclusive	CSTF3, TRMT10C	1	0
METTL14	CSTF3	Mutually_Exclusive	CSTF3, METTL14	1	0
TRMT61B	CSTF3	Mutually_Exclusive	CSTF3, TRMT61B	1	0
NUDT21	CSTF3	Mutually_Exclusive	CSTF3, NUDT21	1	0
PABPN1	ADARB2	Mutually_Exclusive	ADARB2, PABPN1	1	0
TRMT10C	ADARB2	Mutually_Exclusive	ADARB2, TRMT10C	1	0
CLP1	ADARB2	Mutually_Exclusive	ADARB2, CLP1	1	0
TRMT6	ADARB2	Mutually_Exclusive	ADARB2, TRMT6	1	0
WTAP	ADARB2	Mutually_Exclusive	ADARB2, WTAP	1	0
CPSF3	ADARB2	Mutually_Exclusive	ADARB2, CPSF3	1	0
CPSF4	ADARB2	Mutually_Exclusive	ADARB2, CPSF4	1	0
METTL3	ADARB2	Mutually_Exclusive	ADARB2, METTL3	1	0
TRMT10C	PABPN1	Mutually_Exclusive	PABPN1, TRMT10C	1	0
CSTF2	PABPN1	Mutually_Exclusive	CSTF2, PABPN1	1	0
TRMT6	PABPN1	Mutually_Exclusive	PABPN1, TRMT6	1	0
WTAP	PABPN1	Mutually_Exclusive	PABPN1, WTAP	1	0
CPSF3	PABPN1	Mutually_Exclusive	CPSF3, PABPN1	1	0
METTL3	PABPN1	Mutually_Exclusive	METTL3, PABPN1	1	0
NUDT21	PABPN1	Mutually_Exclusive	NUDT21, PABPN1	1	0
CPSF3	TRMT10C	Mutually_Exclusive	CPSF3, TRMT10C	1	0
CPSF4	TRMT10C	Mutually_Exclusive	CPSF4, TRMT10C	1	0
METTL3	TRMT10C	Mutually_Exclusive	METTL3, TRMT10C	1	0
CSTF2	CLP1	Mutually_Exclusive	CLP1, CSTF2	1	0
TRMT6	CLP1	Mutually_Exclusive	CLP1, TRMT6	1	0
WTAP	CLP1	Mutually_Exclusive	CLP1, WTAP	1	0
CPSF3	CLP1	Mutually_Exclusive	CLP1, CPSF3	1	0
CPSF4	CLP1	Mutually_Exclusive	CLP1, CPSF4	1	0
METTL3	CLP1	Mutually_Exclusive	CLP1, METTL3	1	0
NUDT21	CLP1	Mutually_Exclusive	CLP1, NUDT21	1	0
TRMT6	CSTF2	Mutually_Exclusive	CSTF2, TRMT6	1	0
WTAP	CSTF2	Mutually_Exclusive	CSTF2, WTAP	1	0
CPSF3	CSTF2	Mutually_Exclusive	CPSF3, CSTF2	1	0
CPSF4	CSTF2	Mutually_Exclusive	CPSF4, CSTF2	1	0
METTL3	CSTF2	Mutually_Exclusive	CSTF2, METTL3	1	0
NUDT21	CSTF2	Mutually_Exclusive	CSTF2, NUDT21	1	0
WTAP	TRMT6	Mutually_Exclusive	TRMT6, WTAP	1	0
CPSF3	TRMT6	Mutually_Exclusive	CPSF3, TRMT6	1	0
CPSF4	TRMT6	Mutually_Exclusive	CPSF4, TRMT6	1	0
METTL3	TRMT6	Mutually_Exclusive	METTL3, TRMT6	1	0
NUDT21	TRMT6	Mutually_Exclusive	NUDT21, TRMT6	1	0
CPSF3	WTAP	Mutually_Exclusive	CPSF3, WTAP	1	0
METTL3	WTAP	Mutually_Exclusive	METTL3, WTAP	1	0
NUDT21	WTAP	Mutually_Exclusive	NUDT21, WTAP	1	0
TRMT61B	METTL14	Mutually_Exclusive	METTL14, TRMT61B	1	0
NUDT21	METTL14	Mutually_Exclusive	METTL14, NUDT21	1	0
NUDT21	TRMT61B	Mutually_Exclusive	NUDT21, TRMT61B	1	0
CPSF4	CPSF3	Mutually_Exclusive	CPSF3, CPSF4	1	0
METTL3	CPSF3	Mutually_Exclusive	CPSF3, METTL3	1	0
METTL3	CPSF4	Mutually_Exclusive	CPSF4, METTL3	1	0
