# Supplementary material for: Cross-talk of RNA modification "writers" describes tumor stemness and microenvironment and guides personalized immunotherapy for gastric cancer
Source: Aging (Albany NY). 2023 Jun 14;15(12):5445–81. doi: 10.18632/aging.204802 (PMC10333070; doi:10.18632/aging.204802)
Supplement: Supplementary Table 3 [file aging-15-204802-s004.xlsx]

## Sheet: Sheet1
Supplementary Table 3. The differentially activated biological pathways between patients with and without mutation of the 26 writers.
Pathway	logFC	AveExpr	t	P.Value	adj.P.Val	B
RNA_DEGRADATION	-0.259816	-0.0443588	-6.59342	1.43976e-10	2.53397e-08	13.6484
P53_SIGNALING_PATHWAY	-0.203224	-0.0377792	-6.25321	1.08178e-09	9.51969e-08	11.7298
CELL_CYCLE	-0.245605	-0.0324422	-6.00483	4.47715e-09	2.4071e-07	10.3811
NUCLEOTIDE_EXCISION_REPAIR	-0.24388	-0.0505514	-5.96914	5.47069e-09	2.4071e-07	10.191
AMINOACYL_TRNA_BIOSYNTHESIS	-0.283958	-0.0335266	-5.633	3.45012e-08	1.21444e-06	8.44652
OOCYTE_MEIOSIS	-0.162232	-0.0319012	-5.5416	5.60983e-08	1.64555e-06	7.9869
PYRIMIDINE_METABOLISM	-0.202212	-0.0355599	-5.49532	7.15837e-08	1.79982e-06	7.75657
RNA_POLYMERASE	-0.226118	-0.038811	-5.4326	9.93459e-08	2.18561e-06	7.44705
UBIQUITIN_MEDIATED_PROTEOLYSIS	-0.163423	-0.0536654	-5.19741	3.30515e-07	6.46341e-06	6.31357
PROTEIN_EXPORT	-0.232982	-0.0442698	-5.16366	3.91371e-07	6.88812e-06	6.15444
ONE_CARBON_POOL_BY_FOLATE	-0.23061	-0.0357276	-4.99498	8.98667e-07	1.28633e-05	5.3727
BASE_EXCISION_REPAIR	-0.223475	-0.0346392	-4.99325	9.0628e-07	1.28633e-05	5.36477
BASAL_TRANSCRIPTION_FACTORS	-0.179188	-0.0529331	-4.98352	9.50127e-07	1.28633e-05	5.32039
SPLICEOSOME	-0.214199	-0.0376815	-4.84328	1.8619e-06	2.34068e-05	4.68905
FOLATE_BIOSYNTHESIS	-0.218854	0.0266746	-4.65488	4.48502e-06	5.26243e-05	3.86593
PYRUVATE_METABOLISM	-0.151723	-0.041243	-4.34978	1.75273e-05	0.000192801	2.5948
REGULATION_OF_AUTOPHAGY	-0.106159	0.0133125	-4.28568	2.31142e-05	0.0002393	2.33763
DNA_REPLICATION	-0.2381	-0.0178824	-4.26979	2.47425e-05	0.000241926	2.27441
MISMATCH_REPAIR	-0.208201	-0.0311306	-4.09163	5.23267e-05	0.00048471	1.58018
NON_HOMOLOGOUS_END_JOINING	-0.173708	-0.039258	-3.98987	7.93205e-05	0.00069802	1.19579
CITRATE_CYCLE_TCA_CYCLE	-0.191923	-0.0215356	-3.86156	0.000132383	0.00110949	0.723807
GLYCOLYSIS_GLUCONEOGENESIS	-0.136772	-0.017104	-3.83516	0.000146849	0.00117479	0.628433
THYROID_CANCER	-0.13253	-0.0322885	-3.80619	0.000164431	0.00125825	0.524509
HUNTINGTONS_DISEASE	-0.142062	-0.0409299	-3.79073	0.000174614	0.0012805	0.469323
PURINE_METABOLISM	-0.102234	-0.0410246	-3.77939	0.000182455	0.00128448	0.428993
CYTOSOLIC_DNA_SENSING_PATHWAY	-0.118917	-0.0112065	-3.75412	0.000201143	0.00136158	0.339514
HOMOLOGOUS_RECOMBINATION	-0.16615	-0.0394296	-3.66586	0.00028157	0.00183542	0.0313538
ABC_TRANSPORTERS	0.108882	-0.03186	3.64457	0.00030506	0.00191752	-0.0419354
ALZHEIMERS_DISEASE	-0.134338	-0.0368113	-3.55864	0.000419955	0.0024851	-0.333819
SELENOAMINO_ACID_METABOLISM	-0.129223	-0.0412953	-3.55629	0.000423596	0.0024851	-0.34169
PROGESTERONE_MEDIATED_OOCYTE_MATURATION	-0.107706	-0.0348828	-3.52773	0.000470398	0.00267065	-0.437206
PROTEASOME	-0.183134	-0.0170695	-3.42608	0.000679194	0.00373557	-0.771265
DRUG_METABOLISM_CYTOCHROME_P450	0.115891	-0.00204166	3.37734	0.000807469	0.00417984	-0.928178
BLADDER_CANCER	-0.113476	-0.0291149	-3.32442	0.000972118	0.00488836	-1.09618
PENTOSE_PHOSPHATE_PATHWAY	-0.14174	-0.0213972	-3.30868	0.00102681	0.00501996	-1.14567
VIBRIO_CHOLERAE_INFECTION	-0.101428	-0.0292173	-3.28865	0.00110054	0.00509765	-1.20832
ARACHIDONIC_ACID_METABOLISM	0.100951	-0.00548564	3.28863	0.00110063	0.00509765	-1.20839
RIBOFLAVIN_METABOLISM	-0.107785	-0.0361956	-3.25944	0.00121691	0.0054917	-1.29905
BUTANOATE_METABOLISM	-0.125701	-0.0303341	-3.20238	0.00147778	0.00650223	-1.47405
VASCULAR_SMOOTH_MUSCLE_CONTRACTION	0.100088	-0.0272025	3.17639	0.00161298	0.00678993	-1.55279
TERPENOID_BACKBONE_BIOSYNTHESIS	-0.163032	-0.0334437	-3.11164	0.00200106	0.00819038	-1.74633
GALACTOSE_METABOLISM	-0.116567	-0.0220738	-3.05816	0.00238466	0.00932667	-1.90335
FATTY_ACID_METABOLISM	-0.118612	-0.0198255	-3.05048	0.00244499	0.00935475	-1.92568
ARGININE_AND_PROLINE_METABOLISM	-0.104022	-0.0175201	-3.01163	0.00277215	0.0103808	-2.03783
PARKINSONS_DISEASE	-0.141621	-0.0343674	-2.98496	0.00301954	0.0108457	-2.11404
SPHINGOLIPID_METABOLISM	-0.103186	-0.0248606	-2.93507	0.00353723	0.0124511	-2.25485
OXIDATIVE_PHOSPHORYLATION	-0.141393	-0.0333595	-2.89837	0.00396842	0.0136949	-2.35698
COMPLEMENT_AND_COAGULATION_CASCADES	0.106592	0.00882689	2.87734	0.00423659	0.0140726	-2.41494
PROPANOATE_METABOLISM	-0.116177	-0.0482575	-2.87725	0.00423778	0.0140726	-2.41519
LYSINE_DEGRADATION	-0.104672	-0.0381805	-2.81986	0.00505603	0.0164789	-2.57135
GLYCOSYLPHOSPHATIDYLINOSITOL_GPI_ANCHOR_BIOSYNTHESIS	-0.105844	-0.0543181	-2.77498	0.00579301	0.0182066	-2.69135
