# Supplementary material for: Cross-talk of RNA modification "writers" describes tumor stemness and microenvironment and guides personalized immunotherapy for gastric cancer
Source: Aging (Albany NY). 2023 Jun 14;15(12):5445–81. doi: 10.18632/aging.204802 (PMC10333070; doi:10.18632/aging.204802)
Supplement: Supplementary Table 4 [file aging-15-204802-s005.xlsx]

## Sheet: Sheet1
Supplementary Table 4. The grouping information of patients in the meta-GEO cohort.
Patient ID	Dataset	WM_Cluster	Gene_Cluster	WM_Score	WM_Score_Group	ACRG subtypes	Lauren subtypes	Stage
GSM387789	GSE15459	WM_Cluster A	Gene_Cluster A	9.85763	WM_Score high	NA	Mixed	Stage IV
GSM387791	GSE15459	WM_Cluster A	Gene_Cluster D	-19.9013	WM_Score low	NA	Intestinal	Stage IV
GSM387792	GSE15459	WM_Cluster A	Gene_Cluster D	-13.6352	WM_Score low	NA	Intestinal	Stage IV
GSM387794	GSE15459	WM_Cluster B	Gene_Cluster B	46.4531	WM_Score high	NA	Intestinal	Stage IV
GSM387795	GSE15459	WM_Cluster A	Gene_Cluster B	57.4299	WM_Score high	NA	Diffuse	Stage III
GSM387796	GSE15459	WM_Cluster B	Gene_Cluster A	-22.5643	WM_Score low	NA	Intestinal	Stage III
GSM387800	GSE15459	WM_Cluster C	Gene_Cluster A	-18.3633	WM_Score low	NA	Mixed	Stage III
GSM387801	GSE15459	WM_Cluster C	Gene_Cluster D	-27.8395	WM_Score low	NA	Intestinal	Stage I
GSM387802	GSE15459	WM_Cluster A	Gene_Cluster D	-24.713	WM_Score low	NA	Mixed	Stage I
GSM387803	GSE15459	WM_Cluster C	Gene_Cluster D	-44.6099	WM_Score low	NA	Intestinal	Stage IV
GSM387804	GSE15459	WM_Cluster A	Gene_Cluster B	46.4903	WM_Score high	NA	Diffuse	Stage III
GSM387805	GSE15459	WM_Cluster B	Gene_Cluster D	-41.6993	WM_Score low	NA	Intestinal	Stage I
GSM387806	GSE15459	WM_Cluster D	Gene_Cluster A	-11.1665	WM_Score low	NA	Diffuse	Stage III
GSM387807	GSE15459	WM_Cluster C	Gene_Cluster D	-26.1336	WM_Score low	NA	Intestinal	Stage II
GSM387808	GSE15459	WM_Cluster B	Gene_Cluster D	-27.8598	WM_Score low	NA	Intestinal	Stage IV
GSM387809	GSE15459	WM_Cluster A	Gene_Cluster D	-23.5979	WM_Score low	NA	Diffuse	Stage III
GSM387810	GSE15459	WM_Cluster D	Gene_Cluster D	-30.8167	WM_Score low	NA	Mixed	Stage I
GSM387811	GSE15459	WM_Cluster C	Gene_Cluster D	-18.4388	WM_Score low	NA	Intestinal	Stage IV
GSM387812	GSE15459	WM_Cluster D	Gene_Cluster D	-13.5723	WM_Score low	NA	Intestinal	Stage III
GSM387813	GSE15459	WM_Cluster C	Gene_Cluster D	-40.1984	WM_Score low	NA	Intestinal	Stage I
GSM387814	GSE15459	WM_Cluster A	Gene_Cluster C	12.5387	WM_Score high	NA	Diffuse	Stage IV
GSM387815	GSE15459	WM_Cluster B	Gene_Cluster A	-11.6569	WM_Score low	NA	Intestinal	Stage II
GSM387816	GSE15459	WM_Cluster C	Gene_Cluster C	20.3836	WM_Score high	NA	Diffuse	Stage IV
GSM387817	GSE15459	WM_Cluster A	Gene_Cluster A	-12.2027	WM_Score low	NA	Intestinal	Stage I
GSM387818	GSE15459	WM_Cluster C	Gene_Cluster A	-20.7529	WM_Score low	NA	Intestinal	Stage II
GSM387819	GSE15459	WM_Cluster B	Gene_Cluster C	25.8361	WM_Score high	NA	Diffuse	Stage IV
GSM387820	GSE15459	WM_Cluster A	Gene_Cluster A	-18.8178	WM_Score low	NA	Intestinal	Stage IV
GSM387821	GSE15459	WM_Cluster B	Gene_Cluster A	3.2811	WM_Score high	NA	Intestinal	Stage I
GSM387822	GSE15459	WM_Cluster A	Gene_Cluster D	-19.4801	WM_Score low	NA	Intestinal	Stage III
GSM387823	GSE15459	WM_Cluster D	Gene_Cluster D	-5.21023	WM_Score low	NA	Intestinal	Stage IV
GSM387824	GSE15459	WM_Cluster B	Gene_Cluster B	40.0278	WM_Score high	NA	Intestinal	Stage II
GSM387825	GSE15459	WM_Cluster D	Gene_Cluster A	-3.07424	WM_Score low	NA	Intestinal	Stage I
GSM387826	GSE15459	WM_Cluster A	Gene_Cluster B	53.3689	WM_Score high	NA	Diffuse	Stage II
GSM387827	GSE15459	WM_Cluster A	Gene_Cluster B	36.8294	WM_Score high	NA	Intestinal	Stage I
GSM387828	GSE15459	WM_Cluster D	Gene_Cluster D	-31.9103	WM_Score low	NA	Mixed	Stage III
GSM387829	GSE15459	WM_Cluster B	Gene_Cluster C	13.334	WM_Score high	NA	Intestinal	Stage II
GSM387830	GSE15459	WM_Cluster D	Gene_Cluster A	-1.18127	WM_Score low	NA	Diffuse	Stage III
GSM387831	GSE15459	WM_Cluster D	Gene_Cluster D	-31.0587	WM_Score low	NA	Diffuse	Stage IV
GSM387832	GSE15459	WM_Cluster B	Gene_Cluster B	44.9558	WM_Score high	NA	Diffuse	Stage III
GSM387833	GSE15459	WM_Cluster C	Gene_Cluster A	-5.76044	WM_Score low	NA	Intestinal	Stage III
GSM387834	GSE15459	WM_Cluster D	Gene_Cluster C	27.5531	WM_Score high	NA	Diffuse	Stage II
GSM387835	GSE15459	WM_Cluster A	Gene_Cluster D	-10.2233	WM_Score low	NA	Diffuse	Stage III
GSM387836	GSE15459	WM_Cluster B	Gene_Cluster A	9.66399	WM_Score high	NA	Diffuse	Stage III
GSM387837	GSE15459	WM_Cluster A	Gene_Cluster C	19.9055	WM_Score high	NA	Diffuse	Stage III
GSM387838	GSE15459	WM_Cluster B	Gene_Cluster B	52.7841	WM_Score high	NA	Intestinal	Stage III
GSM387839	GSE15459	WM_Cluster B	Gene_Cluster D	-26.5257	WM_Score low	NA	Intestinal	Stage III
GSM387840	GSE15459	WM_Cluster A	Gene_Cluster B	63.3258	WM_Score high	NA	Diffuse	Stage I
GSM387841	GSE15459	WM_Cluster B	Gene_Cluster C	36.5309	WM_Score high	NA	Diffuse	Stage IV
GSM387842	GSE15459	WM_Cluster A	Gene_Cluster D	-0.88274	WM_Score low	NA	Intestinal	Stage IV
GSM387843	GSE15459	WM_Cluster D	Gene_Cluster D	-14.4412	WM_Score low	NA	Intestinal	Stage IV
GSM387845	GSE15459	WM_Cluster A	Gene_Cluster A	0.0496562	WM_Score high	NA	Intestinal	Stage IV
GSM387846	GSE15459	WM_Cluster A	Gene_Cluster D	-16.7532	WM_Score low	NA	Intestinal	Stage III
GSM387847	GSE15459	WM_Cluster B	Gene_Cluster B	53.3365	WM_Score high	NA	Intestinal	Stage I
GSM387848	GSE15459	WM_Cluster A	Gene_Cluster C	9.09408	WM_Score high	NA	Intestinal	Stage III
GSM387849	GSE15459	WM_Cluster B	Gene_Cluster C	15.4129	WM_Score high	NA	Diffuse	Stage IV
GSM387850	GSE15459	WM_Cluster B	Gene_Cluster B	43.8951	WM_Score high	NA	Diffuse	Stage IV
GSM387851	GSE15459	WM_Cluster B	Gene_Cluster C	30.767	WM_Score high	NA	Diffuse	Stage IV
GSM387852	GSE15459	WM_Cluster B	Gene_Cluster C	12.0485	WM_Score high	NA	Mixed	Stage IV
GSM387853	GSE15459	WM_Cluster A	Gene_Cluster B	58.1295	WM_Score high	NA	Intestinal	Stage IV
GSM387854	GSE15459	WM_Cluster C	Gene_Cluster D	-8.71503	WM_Score low	NA	Intestinal	Stage II
GSM387855	GSE15459	WM_Cluster C	Gene_Cluster D	-30.7859	WM_Score low	NA	Intestinal	Stage II
GSM387856	GSE15459	WM_Cluster A	Gene_Cluster A	1.43671	WM_Score high	NA	Intestinal	Stage III
GSM387857	GSE15459	WM_Cluster B	Gene_Cluster B	48.24	WM_Score high	NA	Diffuse	Stage III
GSM387858	GSE15459	WM_Cluster C	Gene_Cluster C	5.2878	WM_Score high	NA	Diffuse	Stage IV
GSM387859	GSE15459	WM_Cluster B	Gene_Cluster C	20.3048	WM_Score high	NA	Diffuse	Stage III
GSM387860	GSE15459	WM_Cluster B	Gene_Cluster C	3.97648	WM_Score high	NA	Intestinal	Stage IV
GSM387861	GSE15459	WM_Cluster A	Gene_Cluster D	-25.7594	WM_Score low	NA	Intestinal	Stage III
GSM387862	GSE15459	WM_Cluster B	Gene_Cluster C	36.8749	WM_Score high	NA	Diffuse	Stage IV
GSM387863	GSE15459	WM_Cluster B	Gene_Cluster C	38.9868	WM_Score high	NA	Intestinal	Stage I
GSM387864	GSE15459	WM_Cluster A	Gene_Cluster A	-3.39658	WM_Score low	NA	Diffuse	Stage III
GSM387865	GSE15459	WM_Cluster B	Gene_Cluster A	-5.43372	WM_Score low	NA	Diffuse	Stage IV
GSM387866	GSE15459	WM_Cluster B	Gene_Cluster C	30.037	WM_Score high	NA	Diffuse	Stage III
GSM387867	GSE15459	WM_Cluster B	Gene_Cluster A	-10.7379	WM_Score low	NA	Diffuse	Stage II
GSM387868	GSE15459	WM_Cluster B	Gene_Cluster C	33.186	WM_Score high	NA	Diffuse	Stage II
GSM387869	GSE15459	WM_Cluster A	Gene_Cluster C	23.1054	WM_Score high	NA	Mixed	Stage III
GSM387870	GSE15459	WM_Cluster B	Gene_Cluster C	10.8632	WM_Score high	NA	Intestinal	Stage IV
GSM387871	GSE15459	WM_Cluster B	Gene_Cluster A	-14.8968	WM_Score low	NA	Intestinal	Stage IV
GSM387872	GSE15459	WM_Cluster C	Gene_Cluster A	-13.989	WM_Score low	NA	Intestinal	Stage I
GSM387873	GSE15459	WM_Cluster C	Gene_Cluster A	-14.6097	WM_Score low	NA	Diffuse	Stage III
GSM387874	GSE15459	WM_Cluster C	Gene_Cluster C	15.1657	WM_Score high	NA	Intestinal	Stage IV
GSM387875	GSE15459	WM_Cluster A	Gene_Cluster C	35.0452	WM_Score high	NA	Intestinal	Stage I
GSM387876	GSE15459	WM_Cluster B	Gene_Cluster C	29.3577	WM_Score high	NA	Diffuse	Stage II
GSM387877	GSE15459	WM_Cluster D	Gene_Cluster D	-16.4734	WM_Score low	NA	Diffuse	Stage III
GSM387878	GSE15459	WM_Cluster B	Gene_Cluster C	24.44	WM_Score high	NA	Diffuse	Stage II
GSM387879	GSE15459	WM_Cluster B	Gene_Cluster A	-3.06147	WM_Score low	NA	Diffuse	Stage I
GSM387880	GSE15459	WM_Cluster A	Gene_Cluster B	39.0138	WM_Score high	NA	Diffuse	Stage I
GSM387881	GSE15459	WM_Cluster C	Gene_Cluster C	28.8753	WM_Score high	NA	Diffuse	Stage IV
GSM387882	GSE15459	WM_Cluster A	Gene_Cluster A	-9.69877	WM_Score low	NA	Intestinal	Stage III
GSM387883	GSE15459	WM_Cluster B	Gene_Cluster A	-13.9024	WM_Score low	NA	Intestinal	Stage II
GSM387884	GSE15459	WM_Cluster B	Gene_Cluster A	-14.1479	WM_Score low	NA	Diffuse	Stage II
GSM387885	GSE15459	WM_Cluster A	Gene_Cluster A	-3.07571	WM_Score low	NA	Diffuse	Stage III
GSM387886	GSE15459	WM_Cluster B	Gene_Cluster A	-9.25584	WM_Score low	NA	Mixed	Stage II
GSM387887	GSE15459	WM_Cluster A	Gene_Cluster A	7.90974	WM_Score high	NA	Intestinal	Stage IV
GSM387888	GSE15459	WM_Cluster A	Gene_Cluster C	30.8808	WM_Score high	NA	Diffuse	Stage I
GSM387889	GSE15459	WM_Cluster A	Gene_Cluster A	0.329705	WM_Score high	NA	Mixed	Stage IV
GSM387890	GSE15459	WM_Cluster D	Gene_Cluster D	-41.5487	WM_Score low	NA	Diffuse	Stage III
GSM387891	GSE15459	WM_Cluster A	Gene_Cluster A	-1.10016	WM_Score low	NA	Diffuse	Stage I
GSM387892	GSE15459	WM_Cluster A	Gene_Cluster A	2.78464	WM_Score high	NA	Intestinal	Stage IV
GSM387893	GSE15459	WM_Cluster B	Gene_Cluster C	12.7328	WM_Score high	NA	Diffuse	Stage III
GSM387894	GSE15459	WM_Cluster D	Gene_Cluster D	-28.6436	WM_Score low	NA	Intestinal	Stage I
GSM387895	GSE15459	WM_Cluster A	Gene_Cluster A	-12.5322	WM_Score low	NA	Intestinal	Stage III
GSM387896	GSE15459	WM_Cluster A	Gene_Cluster A	-11.4581	WM_Score low	NA	Intestinal	Stage III
GSM387897	GSE15459	WM_Cluster B	Gene_Cluster A	-6.60007	WM_Score low	NA	Diffuse	Stage IV
GSM387898	GSE15459	WM_Cluster A	Gene_Cluster B	50.1146	WM_Score high	NA	Mixed	Stage II
GSM387899	GSE15459	WM_Cluster B	Gene_Cluster C	25.8523	WM_Score high	NA	Diffuse	Stage III
GSM387900	GSE15459	WM_Cluster A	Gene_Cluster A	-9.63738	WM_Score low	NA	Intestinal	Stage I
GSM387901	GSE15459	WM_Cluster C	Gene_Cluster D	-29.7789	WM_Score low	NA	Intestinal	Stage I
GSM387902	GSE15459	WM_Cluster B	Gene_Cluster C	7.8083	WM_Score high	NA	Intestinal	Stage II
GSM387903	GSE15459	WM_Cluster D	Gene_Cluster D	-42.6056	WM_Score low	NA	Intestinal	Stage III
GSM387904	GSE15459	WM_Cluster D	Gene_Cluster D	-24.3024	WM_Score low	NA	Mixed	Stage II
GSM387905	GSE15459	WM_Cluster B	Gene_Cluster C	17.4504	WM_Score high	NA	Diffuse	Stage IV
GSM387906	GSE15459	WM_Cluster B	Gene_Cluster C	9.02503	WM_Score high	NA	Diffuse	Stage III
GSM387907	GSE15459	WM_Cluster A	Gene_Cluster A	-17.243	WM_Score low	NA	Mixed	Stage III
GSM387908	GSE15459	WM_Cluster D	Gene_Cluster D	-10.7468	WM_Score low	NA	Intestinal	Stage III
GSM387909	GSE15459	WM_Cluster B	Gene_Cluster C	30.7219	WM_Score high	NA	Diffuse	Stage IV
GSM387910	GSE15459	WM_Cluster A	Gene_Cluster A	-2.29131	WM_Score low	NA	Mixed	Stage IV
GSM387911	GSE15459	WM_Cluster B	Gene_Cluster A	8.4021	WM_Score high	NA	Mixed	Stage IV
GSM387912	GSE15459	WM_Cluster B	Gene_Cluster A	-5.40495	WM_Score low	NA	Diffuse	Stage III
GSM387913	GSE15459	WM_Cluster C	Gene_Cluster D	-32.9212	WM_Score low	NA	Intestinal	Stage IV
GSM387914	GSE15459	WM_Cluster B	Gene_Cluster A	-7.37997	WM_Score low	NA	Intestinal	Stage III
GSM387915	GSE15459	WM_Cluster A	Gene_Cluster C	12.6339	WM_Score high	NA	Diffuse	Stage II
GSM387916	GSE15459	WM_Cluster A	Gene_Cluster A	-18.9625	WM_Score low	NA	Intestinal	Stage I
GSM387917	GSE15459	WM_Cluster B	Gene_Cluster A	-17.468	WM_Score low	NA	Intestinal	Stage IV
GSM387918	GSE15459	WM_Cluster B	Gene_Cluster A	-2.75876	WM_Score low	NA	Diffuse	Stage I
GSM387919	GSE15459	WM_Cluster A	Gene_Cluster C	16.0521	WM_Score high	NA	Intestinal	Stage IV
GSM387920	GSE15459	WM_Cluster D	Gene_Cluster D	-28.7667	WM_Score low	NA	Intestinal	Stage III
GSM387921	GSE15459	WM_Cluster D	Gene_Cluster D	-23.3976	WM_Score low	NA	Intestinal	Stage IV
GSM387922	GSE15459	WM_Cluster D	Gene_Cluster D	-44.3241	WM_Score low	NA	Intestinal	Stage I
GSM387923	GSE15459	WM_Cluster C	Gene_Cluster A	-6.05336	WM_Score low	NA	Intestinal	Stage III
GSM387924	GSE15459	WM_Cluster A	Gene_Cluster A	-7.81841	WM_Score low	NA	Diffuse	Stage IV
GSM387925	GSE15459	WM_Cluster B	Gene_Cluster C	14.0429	WM_Score high	NA	Diffuse	Stage II
GSM387926	GSE15459	WM_Cluster D	Gene_Cluster D	-20.0809	WM_Score low	NA	Diffuse	Stage IV
GSM387927	GSE15459	WM_Cluster B	Gene_Cluster D	-11.5609	WM_Score low	NA	Diffuse	Stage IV
GSM387928	GSE15459	WM_Cluster D	Gene_Cluster D	-32.6643	WM_Score low	NA	Mixed	Stage II
GSM387929	GSE15459	WM_Cluster A	Gene_Cluster C	27.6705	WM_Score high	NA	Diffuse	Stage IV
GSM387930	GSE15459	WM_Cluster D	Gene_Cluster D	-33.2284	WM_Score low	NA	Intestinal	Stage III
GSM387931	GSE15459	WM_Cluster B	Gene_Cluster B	44.4002	WM_Score high	NA	Diffuse	Stage I
GSM387932	GSE15459	WM_Cluster A	Gene_Cluster D	-29.4784	WM_Score low	NA	Intestinal	Stage IV
GSM387933	GSE15459	WM_Cluster B	Gene_Cluster A	4.41075	WM_Score high	NA	Diffuse	Stage IV
GSM387934	GSE15459	WM_Cluster B	Gene_Cluster A	-8.05847	WM_Score low	NA	Diffuse	Stage III
GSM387935	GSE15459	WM_Cluster A	Gene_Cluster A	-14.2534	WM_Score low	NA	Intestinal	Stage IV
GSM387936	GSE15459	WM_Cluster B	Gene_Cluster C	40.9162	WM_Score high	NA	Mixed	Stage III
GSM387938	GSE15459	WM_Cluster A	Gene_Cluster A	-8.6754	WM_Score low	NA	Diffuse	Stage IV
GSM387939	GSE15459	WM_Cluster D	Gene_Cluster D	-22.4217	WM_Score low	NA	Diffuse	Stage I
GSM387940	GSE15459	WM_Cluster A	Gene_Cluster C	24.1512	WM_Score high	NA	Diffuse	Stage III
GSM387941	GSE15459	WM_Cluster C	Gene_Cluster D	-21.7044	WM_Score low	NA	Intestinal	Stage I
GSM387942	GSE15459	WM_Cluster C	Gene_Cluster C	12.8439	WM_Score high	NA	Diffuse	Stage III
GSM387943	GSE15459	WM_Cluster C	Gene_Cluster C	28.847	WM_Score high	NA	Diffuse	Stage IV
GSM387944	GSE15459	WM_Cluster A	Gene_Cluster D	-24.7502	WM_Score low	NA	Intestinal	Stage III
GSM387945	GSE15459	WM_Cluster A	Gene_Cluster D	-13.1567	WM_Score low	NA	Intestinal	Stage III
GSM387946	GSE15459	WM_Cluster A	Gene_Cluster A	2.30197	WM_Score high	NA	Diffuse	Stage II
GSM387947	GSE15459	WM_Cluster D	Gene_Cluster C	8.12247	WM_Score high	NA	Intestinal	Stage IV
GSM387948	GSE15459	WM_Cluster A	Gene_Cluster D	-17.1946	WM_Score low	NA	Intestinal	Stage III
GSM387949	GSE15459	WM_Cluster D	Gene_Cluster D	-32.6688	WM_Score low	NA	Mixed	Stage III
GSM387950	GSE15459	WM_Cluster A	Gene_Cluster B	38.1495	WM_Score high	NA	Diffuse	Stage III
GSM387951	GSE15459	WM_Cluster B	Gene_Cluster D	-24.1465	WM_Score low	NA	Intestinal	Stage IV
GSM387952	GSE15459	WM_Cluster C	Gene_Cluster D	-27.419	WM_Score low	NA	Intestinal	Stage III
GSM387953	GSE15459	WM_Cluster B	Gene_Cluster A	6.07683	WM_Score high	NA	Intestinal	Stage IV
GSM387954	GSE15459	WM_Cluster C	Gene_Cluster C	8.38469	WM_Score high	NA	Intestinal	Stage III
GSM387955	GSE15459	WM_Cluster C	Gene_Cluster A	3.56337	WM_Score high	NA	Diffuse	Stage III
GSM387956	GSE15459	WM_Cluster A	Gene_Cluster C	2.42352	WM_Score high	NA	Diffuse	Stage III
GSM387957	GSE15459	WM_Cluster A	Gene_Cluster C	13.7775	WM_Score high	NA	Diffuse	Stage III
GSM387958	GSE15459	WM_Cluster C	Gene_Cluster D	-26.665	WM_Score low	NA	Diffuse	Stage I
GSM387959	GSE15459	WM_Cluster D	Gene_Cluster D	-17.3423	WM_Score low	NA	Intestinal	Stage IV
GSM387960	GSE15459	WM_Cluster B	Gene_Cluster B	62.9197	WM_Score high	NA	Intestinal	Stage III
GSM387961	GSE15459	WM_Cluster D	Gene_Cluster A	10.0518	WM_Score high	NA	Intestinal	Stage IV
GSM387962	GSE15459	WM_Cluster A	Gene_Cluster A	6.94726	WM_Score high	NA	Intestinal	Stage III
GSM387963	GSE15459	WM_Cluster D	Gene_Cluster D	-13.7211	WM_Score low	NA	Intestinal	Stage III
GSM387964	GSE15459	WM_Cluster C	Gene_Cluster D	-31.0578	WM_Score low	NA	Intestinal	Stage IV
GSM387965	GSE15459	WM_Cluster C	Gene_Cluster A	-9.22525	WM_Score low	NA	Intestinal	Stage II
GSM387966	GSE15459	WM_Cluster A	Gene_Cluster D	-30.612	WM_Score low	NA	Intestinal	Stage I
GSM387967	GSE15459	WM_Cluster B	Gene_Cluster C	23.5433	WM_Score high	NA	Diffuse	Stage III
GSM387968	GSE15459	WM_Cluster D	Gene_Cluster D	-28.4556	WM_Score low	NA	Intestinal	Stage III
GSM387969	GSE15459	WM_Cluster A	Gene_Cluster A	-3.36653	WM_Score low	NA	Intestinal	Stage I
GSM387970	GSE15459	WM_Cluster B	Gene_Cluster A	-1.99268	WM_Score low	NA	Intestinal	Stage III
GSM387971	GSE15459	WM_Cluster C	Gene_Cluster D	-21.2787	WM_Score low	NA	Intestinal	Stage III
GSM387972	GSE15459	WM_Cluster A	Gene_Cluster A	-3.97471	WM_Score low	NA	Intestinal	Stage IV
GSM387973	GSE15459	WM_Cluster D	Gene_Cluster A	-9.34202	WM_Score low	NA	Intestinal	Stage III
GSM387974	GSE15459	WM_Cluster C	Gene_Cluster D	-29.7742	WM_Score low	NA	Intestinal	Stage II
GSM387975	GSE15459	WM_Cluster D	Gene_Cluster D	-21.8821	WM_Score low	NA	Intestinal	Stage III
GSM387976	GSE15459	WM_Cluster D	Gene_Cluster D	-8.82659	WM_Score low	NA	Intestinal	Stage II
GSM387977	GSE15459	WM_Cluster D	Gene_Cluster A	-14.0269	WM_Score low	NA	Intestinal	Stage III
GSM387978	GSE15459	WM_Cluster A	Gene_Cluster B	45.9822	WM_Score high	NA	Diffuse	Stage II
GSM387979	GSE15459	WM_Cluster C	Gene_Cluster A	3.97874	WM_Score high	NA	Diffuse	Stage IV
GSM387980	GSE15459	WM_Cluster A	Gene_Cluster A	9.88945	WM_Score high	NA	Diffuse	Stage III
GSM387981	GSE15459	WM_Cluster D	Gene_Cluster D	-11.8164	WM_Score low	NA	Intestinal	Stage III
GSM387982	GSE15459	WM_Cluster C	Gene_Cluster C	5.13914	WM_Score high	NA	Diffuse	Stage II
GSM387983	GSE15459	WM_Cluster B	Gene_Cluster C	23.0877	WM_Score high	NA	Diffuse	Stage III
GSM387984	GSE15459	WM_Cluster C	Gene_Cluster D	-32.7368	WM_Score low	NA	Intestinal	Stage III
GSM387985	GSE15459	WM_Cluster B	Gene_Cluster A	-15.0124	WM_Score low	NA	Intestinal	Stage II
GSM387986	GSE15459	WM_Cluster C	Gene_Cluster A	-13.1597	WM_Score low	NA	Mixed	Stage I
GSM387987	GSE15459	WM_Cluster D	Gene_Cluster D	-20.9892	WM_Score low	NA	Intestinal	Stage IV
GSM858082	GSE34942	WM_Cluster D	Gene_Cluster D	-18.5445	WM_Score low	NA	Intestinal	Stage III
GSM858083	GSE34942	WM_Cluster D	Gene_Cluster D	-31.1606	WM_Score low	NA	Intestinal	Stage I
GSM858084	GSE34942	WM_Cluster B	Gene_Cluster A	-17.1089	WM_Score low	NA	Diffuse	Stage III
GSM858085	GSE34942	WM_Cluster C	Gene_Cluster D	-21.5797	WM_Score low	NA	Intestinal	Stage I
GSM858086	GSE34942	WM_Cluster A	Gene_Cluster A	-11.3813	WM_Score low	NA	NA	NA
GSM858087	GSE34942	WM_Cluster A	Gene_Cluster C	9.53558	WM_Score high	NA	Intestinal	Stage III
GSM858088	GSE34942	WM_Cluster A	Gene_Cluster A	1.34777	WM_Score high	NA	Intestinal	Stage III
GSM858089	GSE34942	WM_Cluster B	Gene_Cluster B	62.1967	WM_Score high	NA	Diffuse	Stage IV
GSM858090	GSE34942	WM_Cluster C	Gene_Cluster B	57.9473	WM_Score high	NA	Mixed	Stage III
GSM858091	GSE34942	WM_Cluster B	Gene_Cluster B	55.7153	WM_Score high	NA	Intestinal	Stage II
GSM858092	GSE34942	WM_Cluster A	Gene_Cluster A	-13.9236	WM_Score low	NA	Mixed	Stage IV
GSM858093	GSE34942	WM_Cluster D	Gene_Cluster D	-27.4881	WM_Score low	NA	Intestinal	Stage II
GSM858094	GSE34942	WM_Cluster A	Gene_Cluster D	-13.4131	WM_Score low	NA	Intestinal	Stage III
GSM858095	GSE34942	WM_Cluster D	Gene_Cluster D	-24.166	WM_Score low	NA	Intestinal	Stage I
GSM858096	GSE34942	WM_Cluster B	Gene_Cluster C	38.9089	WM_Score high	NA	Intestinal	Stage III
GSM858097	GSE34942	WM_Cluster B	Gene_Cluster D	-19.2128	WM_Score low	NA	Intestinal	Stage I
GSM858098	GSE34942	WM_Cluster D	Gene_Cluster D	-24.2011	WM_Score low	NA	Intestinal	Stage II
GSM858099	GSE34942	WM_Cluster B	Gene_Cluster D	-8.02553	WM_Score low	NA	Intestinal	Stage II
GSM858100	GSE34942	WM_Cluster B	Gene_Cluster C	21.226	WM_Score high	NA	Mixed	Stage III
GSM858101	GSE34942	WM_Cluster D	Gene_Cluster D	-22.1538	WM_Score low	NA	Intestinal	Stage III
GSM858102	GSE34942	WM_Cluster C	Gene_Cluster D	-17.854	WM_Score low	NA	Mixed	Stage I
GSM858103	GSE34942	WM_Cluster A	Gene_Cluster D	-19.5282	WM_Score low	NA	Intestinal	Stage I
GSM858104	GSE34942	WM_Cluster B	Gene_Cluster B	43.8598	WM_Score high	NA	Diffuse	Stage II
GSM858105	GSE34942	WM_Cluster D	Gene_Cluster D	-15.4577	WM_Score low	NA	Intestinal	Stage II
GSM858106	GSE34942	WM_Cluster B	Gene_Cluster C	18.19	WM_Score high	NA	Intestinal	Stage III
GSM858107	GSE34942	WM_Cluster B	Gene_Cluster A	6.95547	WM_Score high	NA	Diffuse	Stage IV
GSM858108	GSE34942	WM_Cluster D	Gene_Cluster D	-31.7182	WM_Score low	NA	Intestinal	Stage III
GSM858109	GSE34942	WM_Cluster C	Gene_Cluster D	-28.4688	WM_Score low	NA	Intestinal	Stage III
GSM858110	GSE34942	WM_Cluster C	Gene_Cluster C	22.3384	WM_Score high	NA	Intestinal	Stage I
GSM858111	GSE34942	WM_Cluster A	Gene_Cluster A	-8.05167	WM_Score low	NA	Intestinal	Stage II
GSM858112	GSE34942	WM_Cluster C	Gene_Cluster D	-18.7757	WM_Score low	NA	Intestinal	Stage I
GSM858113	GSE34942	WM_Cluster B	Gene_Cluster A	-11.5595	WM_Score low	NA	Diffuse	Stage III
GSM858114	GSE34942	WM_Cluster B	Gene_Cluster B	46.143	WM_Score high	NA	Intestinal	Stage III
GSM858115	GSE34942	WM_Cluster D	Gene_Cluster D	-24.0757	WM_Score low	NA	Intestinal	Stage II
GSM858116	GSE34942	WM_Cluster A	Gene_Cluster D	-25.2654	WM_Score low	NA	Intestinal	Stage III
GSM858117	GSE34942	WM_Cluster C	Gene_Cluster A	-2.42594	WM_Score low	NA	Diffuse	Stage III
GSM858118	GSE34942	WM_Cluster B	Gene_Cluster C	23.1828	WM_Score high	NA	Intestinal	Stage IV
GSM858119	GSE34942	WM_Cluster B	Gene_Cluster B	70.1365	WM_Score high	NA	Intestinal	Stage I
GSM858120	GSE34942	WM_Cluster D	Gene_Cluster D	-19.5953	WM_Score low	NA	Intestinal	Stage II
GSM858121	GSE34942	WM_Cluster B	Gene_Cluster C	17.5718	WM_Score high	NA	Diffuse	Stage III
GSM858122	GSE34942	WM_Cluster B	Gene_Cluster A	-12.213	WM_Score low	NA	NA	NA
GSM858123	GSE34942	WM_Cluster A	Gene_Cluster A	-5.63923	WM_Score low	NA	Intestinal	Stage IV
GSM858124	GSE34942	WM_Cluster C	Gene_Cluster A	-8.87053	WM_Score low	NA	Intestinal	Stage IV
GSM858125	GSE34942	WM_Cluster A	Gene_Cluster C	13.3462	WM_Score high	NA	Intestinal	Stage IV
GSM858126	GSE34942	WM_Cluster A	Gene_Cluster A	-22.2532	WM_Score low	NA	Intestinal	Stage III
GSM858127	GSE34942	WM_Cluster A	Gene_Cluster A	-2.44198	WM_Score low	NA	Intestinal	Stage IV
GSM858128	GSE34942	WM_Cluster D	Gene_Cluster D	-26.3683	WM_Score low	NA	Intestinal	Stage IV
GSM858129	GSE34942	WM_Cluster D	Gene_Cluster D	-11.6567	WM_Score low	NA	Intestinal	Stage III
GSM858130	GSE34942	WM_Cluster C	Gene_Cluster B	54.3624	WM_Score high	NA	Diffuse	Stage IV
GSM858131	GSE34942	WM_Cluster D	Gene_Cluster A	-3.31431	WM_Score low	NA	Diffuse	Stage II
GSM858132	GSE34942	WM_Cluster B	Gene_Cluster A	-9.58092	WM_Score low	NA	Intestinal	Stage I
GSM858133	GSE34942	WM_Cluster C	Gene_Cluster A	-8.2823	WM_Score low	NA	Intestinal	Stage IV
GSM858134	GSE34942	WM_Cluster D	Gene_Cluster D	-14.7239	WM_Score low	NA	Intestinal	Stage I
GSM858135	GSE34942	WM_Cluster B	Gene_Cluster C	18.812	WM_Score high	NA	Intestinal	Stage II
GSM858136	GSE34942	WM_Cluster B	Gene_Cluster C	20.6639	WM_Score high	NA	Diffuse	Stage IV
GSM858137	GSE34942	WM_Cluster A	Gene_Cluster A	-2.4503	WM_Score low	NA	Diffuse	Stage IV
GSM1379261	GSE57303	WM_Cluster C	Gene_Cluster D	-12.5124	WM_Score low	NA	NA	Stage III
GSM1379262	GSE57303	WM_Cluster B	Gene_Cluster A	-0.492724	WM_Score high	NA	NA	Stage III
GSM1379263	GSE57303	WM_Cluster A	Gene_Cluster A	-5.48134	WM_Score low	NA	NA	Stage III
GSM1379264	GSE57303	WM_Cluster D	Gene_Cluster D	-25.502	WM_Score low	NA	NA	Stage III
GSM1379265	GSE57303	WM_Cluster A	Gene_Cluster C	14.199	WM_Score high	NA	NA	Stage IV
GSM1379266	GSE57303	WM_Cluster A	Gene_Cluster A	-6.967	WM_Score low	NA	NA	Stage III
GSM1379267	GSE57303	WM_Cluster B	Gene_Cluster C	33.1347	WM_Score high	NA	NA	Stage III
GSM1379268	GSE57303	WM_Cluster D	Gene_Cluster D	-24.8789	WM_Score low	NA	NA	Stage III
GSM1379269	GSE57303	WM_Cluster B	Gene_Cluster B	47.7385	WM_Score high	NA	NA	Stage III
GSM1379270	GSE57303	WM_Cluster C	Gene_Cluster D	-17.5013	WM_Score low	NA	NA	Stage III
GSM1379271	GSE57303	WM_Cluster B	Gene_Cluster A	-1.48799	WM_Score low	NA	NA	Stage III
GSM1379272	GSE57303	WM_Cluster A	Gene_Cluster A	-14.3431	WM_Score low	NA	NA	Stage III
GSM1379273	GSE57303	WM_Cluster A	Gene_Cluster A	-16.3799	WM_Score low	NA	NA	Stage III
GSM1379274	GSE57303	WM_Cluster D	Gene_Cluster A	-8.64873	WM_Score low	NA	NA	Stage III
GSM1379275	GSE57303	WM_Cluster D	Gene_Cluster A	-7.39479	WM_Score low	NA	NA	Stage II
GSM1379276	GSE57303	WM_Cluster B	Gene_Cluster A	-0.327509	WM_Score high	NA	NA	Stage III
GSM1379277	GSE57303	WM_Cluster D	Gene_Cluster D	-8.75443	WM_Score low	NA	NA	Stage III
GSM1379278	GSE57303	WM_Cluster D	Gene_Cluster D	-22.327	WM_Score low	NA	NA	Stage III
GSM1379279	GSE57303	WM_Cluster D	Gene_Cluster A	2.54946	WM_Score high	NA	NA	Stage III
GSM1379280	GSE57303	WM_Cluster A	Gene_Cluster A	1.08828	WM_Score high	NA	NA	Stage III
GSM1379281	GSE57303	WM_Cluster A	Gene_Cluster A	2.44032	WM_Score high	NA	NA	Stage III
GSM1379282	GSE57303	WM_Cluster A	Gene_Cluster D	-23.5095	WM_Score low	NA	NA	Stage III
GSM1379283	GSE57303	WM_Cluster B	Gene_Cluster B	53.9715	WM_Score high	NA	NA	Stage III
GSM1379284	GSE57303	WM_Cluster C	Gene_Cluster C	11.3059	WM_Score high	NA	NA	Stage III
GSM1379285	GSE57303	WM_Cluster A	Gene_Cluster A	-3.71857	WM_Score low	NA	NA	Stage III
GSM1379286	GSE57303	WM_Cluster B	Gene_Cluster A	-5.20646	WM_Score low	NA	NA	Stage III
GSM1379287	GSE57303	WM_Cluster A	Gene_Cluster A	6.49662	WM_Score high	NA	NA	Stage II
GSM1379288	GSE57303	WM_Cluster A	Gene_Cluster A	-10.6335	WM_Score low	NA	NA	Stage III
GSM1379289	GSE57303	WM_Cluster A	Gene_Cluster A	2.25805	WM_Score high	NA	NA	Stage IV
GSM1379290	GSE57303	WM_Cluster B	Gene_Cluster B	50.2078	WM_Score high	NA	NA	Stage III
GSM1379291	GSE57303	WM_Cluster B	Gene_Cluster D	-11.2115	WM_Score low	NA	NA	Stage IV
GSM1379292	GSE57303	WM_Cluster A	Gene_Cluster A	-1.59855	WM_Score low	NA	NA	Stage III
GSM1379293	GSE57303	WM_Cluster C	Gene_Cluster A	-7.55723	WM_Score low	NA	NA	Stage III
GSM1379294	GSE57303	WM_Cluster D	Gene_Cluster D	-5.17417	WM_Score low	NA	NA	Stage III
GSM1379295	GSE57303	WM_Cluster B	Gene_Cluster A	9.21412	WM_Score high	NA	NA	Stage IV
GSM1379296	GSE57303	WM_Cluster D	Gene_Cluster A	-2.32481	WM_Score low	NA	NA	Stage III
GSM1379297	GSE57303	WM_Cluster B	Gene_Cluster A	-10.8796	WM_Score low	NA	NA	Stage II
GSM1379298	GSE57303	WM_Cluster B	Gene_Cluster B	53.4422	WM_Score high	NA	NA	Stage III
GSM1379299	GSE57303	WM_Cluster C	Gene_Cluster D	-14.8407	WM_Score low	NA	NA	Stage IV
GSM1379300	GSE57303	WM_Cluster B	Gene_Cluster C	26.0773	WM_Score high	NA	NA	Stage IV
GSM1379301	GSE57303	WM_Cluster D	Gene_Cluster D	-9.54509	WM_Score low	NA	NA	Stage III
GSM1379302	GSE57303	WM_Cluster D	Gene_Cluster D	-17.7522	WM_Score low	NA	NA	Stage III
GSM1379303	GSE57303	WM_Cluster A	Gene_Cluster C	9.09665	WM_Score high	NA	NA	Stage III
GSM1379304	GSE57303	WM_Cluster A	Gene_Cluster C	15.7298	WM_Score high	NA	NA	Stage IV
GSM1379305	GSE57303	WM_Cluster B	Gene_Cluster A	-10.4646	WM_Score low	NA	NA	Stage III
GSM1379306	GSE57303	WM_Cluster C	Gene_Cluster D	-14.8118	WM_Score low	NA	NA	Stage III
GSM1379307	GSE57303	WM_Cluster A	Gene_Cluster A	8.11145	WM_Score high	NA	NA	Stage IV
GSM1379308	GSE57303	WM_Cluster A	Gene_Cluster D	-22.4452	WM_Score low	NA	NA	Stage III
GSM1379309	GSE57303	WM_Cluster B	Gene_Cluster A	-10.028	WM_Score low	NA	NA	Stage III
GSM1379310	GSE57303	WM_Cluster A	Gene_Cluster C	25.9199	WM_Score high	NA	NA	Stage III
GSM1379311	GSE57303	WM_Cluster C	Gene_Cluster A	-8.76813	WM_Score low	NA	NA	Stage II
GSM1379312	GSE57303	WM_Cluster B	Gene_Cluster C	15.3598	WM_Score high	NA	NA	Stage III
GSM1379313	GSE57303	WM_Cluster A	Gene_Cluster D	-17.3828	WM_Score low	NA	NA	Stage III
GSM1379314	GSE57303	WM_Cluster A	Gene_Cluster A	5.69801	WM_Score high	NA	NA	Stage III
GSM1379315	GSE57303	WM_Cluster A	Gene_Cluster A	-0.61195	WM_Score low	NA	NA	Stage III
GSM1379316	GSE57303	WM_Cluster D	Gene_Cluster A	-11.4843	WM_Score low	NA	NA	Stage III
GSM1379317	GSE57303	WM_Cluster D	Gene_Cluster D	-10.3205	WM_Score low	NA	NA	Stage III
GSM1379318	GSE57303	WM_Cluster C	Gene_Cluster D	-10.3669	WM_Score low	NA	NA	Stage II
GSM1379319	GSE57303	WM_Cluster A	Gene_Cluster A	-5.67828	WM_Score low	NA	NA	Stage III
GSM1379320	GSE57303	WM_Cluster C	Gene_Cluster C	10.6837	WM_Score high	NA	NA	Stage III
GSM1379321	GSE57303	WM_Cluster A	Gene_Cluster D	-15.6492	WM_Score low	NA	NA	Stage IV
GSM1379322	GSE57303	WM_Cluster A	Gene_Cluster D	-11.232	WM_Score low	NA	NA	Stage III
GSM1379323	GSE57303	WM_Cluster C	Gene_Cluster D	-15.7039	WM_Score low	NA	NA	Stage II
GSM1379324	GSE57303	WM_Cluster B	Gene_Cluster A	-9.94918	WM_Score low	NA	NA	Stage III
GSM1379325	GSE57303	WM_Cluster D	Gene_Cluster D	-13.8388	WM_Score low	NA	NA	Stage III
GSM1379326	GSE57303	WM_Cluster A	Gene_Cluster D	-11.0504	WM_Score low	NA	NA	Stage III
GSM1379327	GSE57303	WM_Cluster B	Gene_Cluster A	-5.1125	WM_Score low	NA	NA	Stage II
GSM1379328	GSE57303	WM_Cluster B	Gene_Cluster C	14.6714	WM_Score high	NA	NA	Stage III
GSM1379329	GSE57303	WM_Cluster A	Gene_Cluster C	10.9494	WM_Score high	NA	NA	Stage III
GSM1379330	GSE57303	WM_Cluster B	Gene_Cluster B	71.5892	WM_Score high	NA	NA	Stage III
GSM1523727	GSE62254	WM_Cluster A	Gene_Cluster D	-12.2045	WM_Score low	MSI	intestinal	Stage II
GSM1523728	GSE62254	WM_Cluster A	Gene_Cluster D	-8.84023	WM_Score low	MSI	intestinal	Stage II
GSM1523729	GSE62254	WM_Cluster A	Gene_Cluster A	-7.99188	WM_Score low	MSS/TP53+	diffuse	Stage II
GSM1523744	GSE62254	WM_Cluster D	Gene_Cluster D	-17.3552	WM_Score low	MSI	diffuse	Stage II
GSM1523745	GSE62254	WM_Cluster D	Gene_Cluster D	-14.5918	WM_Score low	MSS/TP53-	diffuse	Stage III
GSM1523746	GSE62254	WM_Cluster D	Gene_Cluster A	-3.42699	WM_Score low	MSS/TP53-	mixed	Stage II
GSM1523747	GSE62254	WM_Cluster D	Gene_Cluster D	-20.8889	WM_Score low	MSS/TP53+	mixed	Stage II
GSM1523748	GSE62254	WM_Cluster B	Gene_Cluster A	-1.19695	WM_Score low	MSS/TP53+	diffuse	Stage III
GSM1523765	GSE62254	WM_Cluster A	Gene_Cluster D	-15.2382	WM_Score low	MSS/TP53-	diffuse	Stage III
GSM1523768	GSE62254	WM_Cluster B	Gene_Cluster C	11.2152	WM_Score high	MSS/TP53-	intestinal	Stage II
GSM1523769	GSE62254	WM_Cluster B	Gene_Cluster A	5.78867	WM_Score high	MSS/TP53-	diffuse	Stage III
GSM1523770	GSE62254	WM_Cluster A	Gene_Cluster D	-16.4006	WM_Score low	MSI	intestinal	Stage II
GSM1523771	GSE62254	WM_Cluster B	Gene_Cluster B	56.1905	WM_Score high	EMT	diffuse	Stage IV
GSM1523772	GSE62254	WM_Cluster B	Gene_Cluster B	44.0365	WM_Score high	EMT	diffuse	Stage III
GSM1523773	GSE62254	WM_Cluster B	Gene_Cluster B	56.9566	WM_Score high	EMT	diffuse	Stage III
GSM1523774	GSE62254	WM_Cluster B	Gene_Cluster B	40.1249	WM_Score high	EMT	intestinal	Stage II
GSM1523775	GSE62254	WM_Cluster A	Gene_Cluster D	-18.833	WM_Score low	MSI	diffuse	Stage II
GSM1523776	GSE62254	WM_Cluster C	Gene_Cluster D	-17.7176	WM_Score low	MSI	diffuse	Stage II
GSM1523777	GSE62254	WM_Cluster A	Gene_Cluster D	-12.8186	WM_Score low	MSS/TP53-	intestinal	Stage II
GSM1523778	GSE62254	WM_Cluster B	Gene_Cluster A	6.77103	WM_Score high	MSS/TP53-	diffuse	Stage III
GSM1523779	GSE62254	WM_Cluster B	Gene_Cluster D	-17.8223	WM_Score low	MSI	diffuse	Stage III
GSM1523780	GSE62254	WM_Cluster D	Gene_Cluster D	-8.32926	WM_Score low	MSI	intestinal	Stage IV
GSM1523781	GSE62254	WM_Cluster B	Gene_Cluster A	-11.2515	WM_Score low	MSS/TP53-	intestinal	Stage II
GSM1523782	GSE62254	WM_Cluster C	Gene_Cluster A	-7.80219	WM_Score low	MSS/TP53+	intestinal	Stage II
GSM1523783	GSE62254	WM_Cluster B	Gene_Cluster C	6.46668	WM_Score high	MSS/TP53+	diffuse	Stage II
GSM1523784	GSE62254	WM_Cluster B	Gene_Cluster A	4.7052	WM_Score high	MSS/TP53-	diffuse	Stage II
GSM1523785	GSE62254	WM_Cluster B	Gene_Cluster A	-3.32663	WM_Score low	MSI	intestinal	Stage II
GSM1523786	GSE62254	WM_Cluster B	Gene_Cluster A	3.18362	WM_Score high	MSS/TP53+	diffuse	Stage II
GSM1523787	GSE62254	WM_Cluster D	Gene_Cluster D	-24.18	WM_Score low	MSS/TP53+	intestinal	Stage II
GSM1523788	GSE62254	WM_Cluster B	Gene_Cluster C	29.4369	WM_Score high	EMT	diffuse	Stage II
GSM1523789	GSE62254	WM_Cluster A	Gene_Cluster C	9.14294	WM_Score high	MSS/TP53-	diffuse	Stage II
GSM1523790	GSE62254	WM_Cluster A	Gene_Cluster A	-3.4978	WM_Score low	MSI	intestinal	Stage II
GSM1523791	GSE62254	WM_Cluster D	Gene_Cluster D	-14.1091	WM_Score low	MSI	intestinal	Stage II
GSM1523792	GSE62254	WM_Cluster D	Gene_Cluster D	-24.0323	WM_Score low	MSS/TP53-	intestinal	Stage II
GSM1523793	GSE62254	WM_Cluster B	Gene_Cluster A	-1.51629	WM_Score low	MSS/TP53+	diffuse	Stage II
GSM1523794	GSE62254	WM_Cluster B	Gene_Cluster A	3.69058	WM_Score high	MSI	diffuse	Stage II
GSM1523795	GSE62254	WM_Cluster D	Gene_Cluster D	-10.8256	WM_Score low	MSS/TP53+	intestinal	Stage II
GSM1523796	GSE62254	WM_Cluster B	Gene_Cluster C	34.8689	WM_Score high	EMT	intestinal	Stage III
GSM1523797	GSE62254	WM_Cluster D	Gene_Cluster D	-15.5302	WM_Score low	MSI	intestinal	Stage III
GSM1523798	GSE62254	WM_Cluster A	Gene_Cluster A	9.77534	WM_Score high	EMT	diffuse	Stage II
GSM1523799	GSE62254	WM_Cluster A	Gene_Cluster A	-4.02773	WM_Score low	MSS/TP53+	intestinal	Stage II
GSM1523800	GSE62254	WM_Cluster C	Gene_Cluster D	-18.4745	WM_Score low	MSI	intestinal	Stage II
GSM1523801	GSE62254	WM_Cluster A	Gene_Cluster D	-22.4822	WM_Score low	MSI	NA	Stage II
GSM1523802	GSE62254	WM_Cluster D	Gene_Cluster A	-17.3987	WM_Score low	MSS/TP53-	intestinal	Stage II
GSM1523803	GSE62254	WM_Cluster D	Gene_Cluster D	-17.5394	WM_Score low	MSS/TP53+	NA	Stage III
GSM1523804	GSE62254	WM_Cluster B	Gene_Cluster A	2.48952	WM_Score high	MSS/TP53+	diffuse	Stage III
GSM1523805	GSE62254	WM_Cluster B	Gene_Cluster A	5.41998	WM_Score high	MSI	mixed	Stage III
GSM1523806	GSE62254	WM_Cluster D	Gene_Cluster A	-9.26983	WM_Score low	MSS/TP53-	intestinal	Stage III
GSM1523807	GSE62254	WM_Cluster D	Gene_Cluster A	-4.15963	WM_Score low	MSS/TP53-	intestinal	Stage II
GSM1523808	GSE62254	WM_Cluster B	Gene_Cluster A	7.00246	WM_Score high	MSI	diffuse	Stage III
GSM1523809	GSE62254	WM_Cluster A	Gene_Cluster D	-15.5889	WM_Score low	MSS/TP53+	intestinal	Stage II
GSM1523810	GSE62254	WM_Cluster A	Gene_Cluster D	-8.66872	WM_Score low	MSI	intestinal	Stage II
GSM1523811	GSE62254	WM_Cluster A	Gene_Cluster D	-13.5552	WM_Score low	MSI	intestinal	Stage II
GSM1523812	GSE62254	WM_Cluster D	Gene_Cluster A	-1.34509	WM_Score low	MSS/TP53+	diffuse	Stage III
GSM1523813	GSE62254	WM_Cluster A	Gene_Cluster D	-5.64691	WM_Score low	MSI	diffuse	Stage III
GSM1523814	GSE62254	WM_Cluster D	Gene_Cluster D	-11.798	WM_Score low	MSS/TP53+	intestinal	Stage II
GSM1523815	GSE62254	WM_Cluster C	Gene_Cluster D	-2.46344	WM_Score low	MSS/TP53-	mixed	Stage II
GSM1523816	GSE62254	WM_Cluster D	Gene_Cluster D	-18.7886	WM_Score low	MSS/TP53-	intestinal	Stage II
GSM1523817	GSE62254	WM_Cluster C	Gene_Cluster A	9.89458	WM_Score high	MSS/TP53-	diffuse	Stage III
GSM1523818	GSE62254	WM_Cluster D	Gene_Cluster A	-11.9956	WM_Score low	MSS/TP53+	diffuse	Stage III
GSM1523819	GSE62254	WM_Cluster C	Gene_Cluster A	-2.89168	WM_Score low	MSS/TP53+	intestinal	Stage IV
GSM1523820	GSE62254	WM_Cluster D	Gene_Cluster A	-8.92262	WM_Score low	MSS/TP53+	intestinal	Stage III
GSM1523821	GSE62254	WM_Cluster D	Gene_Cluster D	-24.3352	WM_Score low	MSI	intestinal	Stage IV
GSM1523822	GSE62254	WM_Cluster B	Gene_Cluster A	-2.6509	WM_Score low	MSI	intestinal	Stage II
GSM1523823	GSE62254	WM_Cluster B	Gene_Cluster D	-14.9185	WM_Score low	MSI	intestinal	Stage II
GSM1523824	GSE62254	WM_Cluster A	Gene_Cluster D	-13.1558	WM_Score low	MSS/TP53-	intestinal	Stage II
GSM1523825	GSE62254	WM_Cluster C	Gene_Cluster D	-9.03374	WM_Score low	MSI	intestinal	Stage III
GSM1523826	GSE62254	WM_Cluster B	Gene_Cluster A	-4.12342	WM_Score low	MSS/TP53-	intestinal	Stage III
GSM1523827	GSE62254	WM_Cluster B	Gene_Cluster C	12.506	WM_Score high	MSS/TP53-	diffuse	Stage III
GSM1523828	GSE62254	WM_Cluster B	Gene_Cluster A	7.06144	WM_Score high	MSI	intestinal	Stage III
GSM1523829	GSE62254	WM_Cluster B	Gene_Cluster D	-14.6918	WM_Score low	MSS/TP53-	intestinal	Stage II
GSM1523830	GSE62254	WM_Cluster D	Gene_Cluster D	-18.189	WM_Score low	MSI	intestinal	Stage II
GSM1523831	GSE62254	WM_Cluster B	Gene_Cluster D	-9.37852	WM_Score low	MSS/TP53+	diffuse	Stage II
GSM1523832	GSE62254	WM_Cluster B	Gene_Cluster A	-2.11182	WM_Score low	MSS/TP53+	intestinal	Stage II
GSM1523833	GSE62254	WM_Cluster A	Gene_Cluster D	-18.4693	WM_Score low	MSI	diffuse	Stage III
GSM1523834	GSE62254	WM_Cluster B	Gene_Cluster C	12.7689	WM_Score high	MSS/TP53+	diffuse	Stage III
GSM1523835	GSE62254	WM_Cluster A	Gene_Cluster C	18.0125	WM_Score high	EMT	intestinal	Stage II
GSM1523836	GSE62254	WM_Cluster D	Gene_Cluster D	-9.74438	WM_Score low	MSS/TP53+	intestinal	Stage III
GSM1523837	GSE62254	WM_Cluster A	Gene_Cluster D	-14.6363	WM_Score low	MSS/TP53-	intestinal	Stage II
GSM1523838	GSE62254	WM_Cluster A	Gene_Cluster D	-8.07767	WM_Score low	MSI	intestinal	Stage III
GSM1523839	GSE62254	WM_Cluster B	Gene_Cluster A	2.73234	WM_Score high	MSS/TP53-	diffuse	Stage III
GSM1523840	GSE62254	WM_Cluster D	Gene_Cluster D	-13.084	WM_Score low	MSS/TP53+	diffuse	Stage II
GSM1523841	GSE62254	WM_Cluster D	Gene_Cluster D	-8.19577	WM_Score low	MSS/TP53+	mixed	Stage II
GSM1523842	GSE62254	WM_Cluster B	Gene_Cluster A	-8.45581	WM_Score low	MSS/TP53-	diffuse	Stage II
GSM1523843	GSE62254	WM_Cluster D	Gene_Cluster A	-0.464447	WM_Score high	MSS/TP53-	diffuse	Stage IV
GSM1523844	GSE62254	WM_Cluster B	Gene_Cluster C	11.4815	WM_Score high	EMT	intestinal	Stage III
GSM1523845	GSE62254	WM_Cluster D	Gene_Cluster A	-2.13935	WM_Score low	MSS/TP53+	diffuse	Stage III
GSM1523846	GSE62254	WM_Cluster A	Gene_Cluster A	5.83982	WM_Score high	EMT	diffuse	Stage II
GSM1523847	GSE62254	WM_Cluster D	Gene_Cluster D	-20.5892	WM_Score low	MSI	intestinal	Stage II
GSM1523848	GSE62254	WM_Cluster D	Gene_Cluster A	8.0209	WM_Score high	EMT	diffuse	Stage III
GSM1523849	GSE62254	WM_Cluster D	Gene_Cluster C	17.7134	WM_Score high	EMT	intestinal	Stage III
GSM1523850	GSE62254	WM_Cluster A	Gene_Cluster C	30.0039	WM_Score high	EMT	diffuse	Stage IV
GSM1523851	GSE62254	WM_Cluster D	Gene_Cluster D	-20.9234	WM_Score low	MSI	intestinal	Stage II
GSM1523852	GSE62254	WM_Cluster B	Gene_Cluster A	-6.44418	WM_Score low	MSS/TP53-	intestinal	Stage III
GSM1523853	GSE62254	WM_Cluster A	Gene_Cluster D	-10.7609	WM_Score low	MSS/TP53-	intestinal	Stage II
GSM1523854	GSE62254	WM_Cluster D	Gene_Cluster A	-6.97278	WM_Score low	MSS/TP53-	diffuse	Stage II
GSM1523855	GSE62254	WM_Cluster A	Gene_Cluster D	-8.74267	WM_Score low	MSS/TP53-	intestinal	Stage II
GSM1523856	GSE62254	WM_Cluster A	Gene_Cluster D	-9.55901	WM_Score low	MSI	diffuse	Stage II
GSM1523857	GSE62254	WM_Cluster B	Gene_Cluster C	28.6243	WM_Score high	MSS/TP53-	intestinal	Stage III
GSM1523858	GSE62254	WM_Cluster B	Gene_Cluster B	94.9489	WM_Score high	EMT	diffuse	Stage II
GSM1523859	GSE62254	WM_Cluster B	Gene_Cluster A	-6.62448	WM_Score low	MSS/TP53+	intestinal	Stage II
GSM1523860	GSE62254	WM_Cluster D	Gene_Cluster D	-16.6823	WM_Score low	MSI	mixed	Stage II
GSM1523861	GSE62254	WM_Cluster B	Gene_Cluster A	-10.1242	WM_Score low	MSS/TP53+	intestinal	Stage II
GSM1523862	GSE62254	WM_Cluster A	Gene_Cluster B	61.9377	WM_Score high	EMT	diffuse	Stage III
GSM1523863	GSE62254	WM_Cluster C	Gene_Cluster D	-18.7138	WM_Score low	MSI	mixed	Stage II
GSM1523864	GSE62254	WM_Cluster A	Gene_Cluster D	-13.7485	WM_Score low	MSI	intestinal	Stage II
GSM1523865	GSE62254	WM_Cluster D	Gene_Cluster D	-17.4944	WM_Score low	MSS/TP53-	intestinal	Stage II
GSM1523866	GSE62254	WM_Cluster B	Gene_Cluster C	11.2566	WM_Score high	EMT	intestinal	Stage III
GSM1523867	GSE62254	WM_Cluster B	Gene_Cluster D	-19.7499	WM_Score low	MSI	intestinal	Stage II
GSM1523868	GSE62254	WM_Cluster D	Gene_Cluster D	-8.61807	WM_Score low	MSI	mixed	Stage III
GSM1523869	GSE62254	WM_Cluster A	Gene_Cluster A	-9.07861	WM_Score low	MSS/TP53+	diffuse	Stage II
GSM1523870	GSE62254	WM_Cluster D	Gene_Cluster D	-26.7003	WM_Score low	MSI	intestinal	Stage II
GSM1523871	GSE62254	WM_Cluster A	Gene_Cluster D	-16.3237	WM_Score low	MSI	intestinal	Stage II
GSM1523872	GSE62254	WM_Cluster A	Gene_Cluster A	5.74032	WM_Score high	MSS/TP53-	diffuse	Stage IV
GSM1523873	GSE62254	WM_Cluster B	Gene_Cluster A	-10.5977	WM_Score low	MSS/TP53+	diffuse	Stage II
GSM1523874	GSE62254	WM_Cluster D	Gene_Cluster A	-6.65092	WM_Score low	MSS/TP53-	intestinal	Stage II
GSM1523875	GSE62254	WM_Cluster C	Gene_Cluster D	-18.7966	WM_Score low	MSS/TP53+	intestinal	Stage II
GSM1523876	GSE62254	WM_Cluster B	Gene_Cluster D	-19.9361	WM_Score low	MSI	intestinal	Stage II
GSM1523877	GSE62254	WM_Cluster C	Gene_Cluster D	-15.2804	WM_Score low	MSS/TP53-	intestinal	Stage II
GSM1523878	GSE62254	WM_Cluster B	Gene_Cluster A	-9.81314	WM_Score low	MSS/TP53+	intestinal	Stage II
GSM1523879	GSE62254	WM_Cluster C	Gene_Cluster A	-12.3594	WM_Score low	MSS/TP53-	intestinal	Stage III
GSM1523880	GSE62254	WM_Cluster D	Gene_Cluster D	-25.3136	WM_Score low	MSI	diffuse	Stage II
GSM1523881	GSE62254	WM_Cluster B	Gene_Cluster A	-3.06176	WM_Score low	MSS/TP53+	intestinal	Stage II
GSM1523882	GSE62254	WM_Cluster D	Gene_Cluster D	-27.5514	WM_Score low	MSS/TP53+	diffuse	Stage II
GSM1523883	GSE62254	WM_Cluster D	Gene_Cluster D	-17.3641	WM_Score low	MSS/TP53+	NA	Stage II
GSM1523884	GSE62254	WM_Cluster B	Gene_Cluster A	4.47193	WM_Score high	MSS/TP53+	diffuse	Stage III
GSM1523885	GSE62254	WM_Cluster D	Gene_Cluster D	-19.4316	WM_Score low	MSI	diffuse	Stage II
GSM1523886	GSE62254	WM_Cluster B	Gene_Cluster C	29.6255	WM_Score high	EMT	diffuse	Stage III
GSM1523887	GSE62254	WM_Cluster C	Gene_Cluster D	-6.48499	WM_Score low	MSS/TP53-	diffuse	Stage II
GSM1523888	GSE62254	WM_Cluster A	Gene_Cluster D	-18.548	WM_Score low	MSI	intestinal	Stage II
GSM1523889	GSE62254	WM_Cluster B	Gene_Cluster A	-12.4172	WM_Score low	MSI	intestinal	Stage II
GSM1523890	GSE62254	WM_Cluster B	Gene_Cluster A	-2.99535	WM_Score low	MSS/TP53-	diffuse	Stage III
GSM1523891	GSE62254	WM_Cluster D	Gene_Cluster A	1.95312	WM_Score high	MSS/TP53-	intestinal	Stage II
GSM1523892	GSE62254	WM_Cluster B	Gene_Cluster A	0.0741684	WM_Score high	MSS/TP53-	intestinal	Stage II
GSM1523893	GSE62254	WM_Cluster D	Gene_Cluster D	-16.1855	WM_Score low	MSS/TP53-	intestinal	Stage II
GSM1523894	GSE62254	WM_Cluster B	Gene_Cluster D	-15.1392	WM_Score low	MSS/TP53+	intestinal	Stage II
GSM1523895	GSE62254	WM_Cluster D	Gene_Cluster D	-25.9055	WM_Score low	MSS/TP53-	intestinal	Stage II
GSM1523896	GSE62254	WM_Cluster D	Gene_Cluster A	-4.5567	WM_Score low	MSS/TP53+	intestinal	Stage II
GSM1523897	GSE62254	WM_Cluster A	Gene_Cluster D	-21.491	WM_Score low	MSS/TP53-	intestinal	Stage II
GSM1523898	GSE62254	WM_Cluster D	Gene_Cluster D	-14.3087	WM_Score low	MSS/TP53+	intestinal	Stage II
GSM1523899	GSE62254	WM_Cluster C	Gene_Cluster A	-7.64601	WM_Score low	MSS/TP53+	intestinal	Stage II
GSM1523901	GSE62254	WM_Cluster D	Gene_Cluster D	-21.5674	WM_Score low	MSI	intestinal	Stage II
GSM1523903	GSE62254	WM_Cluster A	Gene_Cluster A	-2.31132	WM_Score low	MSI	intestinal	Stage IV
GSM1523904	GSE62254	WM_Cluster A	Gene_Cluster A	-8.55847	WM_Score low	MSS/TP53-	intestinal	Stage II
GSM1523905	GSE62254	WM_Cluster B	Gene_Cluster A	-7.17875	WM_Score low	MSS/TP53-	diffuse	Stage II
GSM1523906	GSE62254	WM_Cluster D	Gene_Cluster A	-3.77062	WM_Score low	EMT	diffuse	Stage II
GSM1523908	GSE62254	WM_Cluster C	Gene_Cluster D	-9.77026	WM_Score low	MSS/TP53-	diffuse	Stage IV
GSM1523909	GSE62254	WM_Cluster D	Gene_Cluster D	-13.4743	WM_Score low	MSI	diffuse	Stage II
GSM1523910	GSE62254	WM_Cluster D	Gene_Cluster D	-25.2845	WM_Score low	MSI	diffuse	Stage III
GSM1523911	GSE62254	WM_Cluster A	Gene_Cluster A	-4.61362	WM_Score low	MSI	intestinal	Stage III
GSM1523918	GSE62254	WM_Cluster A	Gene_Cluster B	36.7826	WM_Score high	EMT	diffuse	Stage III
GSM1523919	GSE62254	WM_Cluster A	Gene_Cluster A	2.16279	WM_Score high	MSS/TP53+	intestinal	Stage IV
GSM1523920	GSE62254	WM_Cluster A	Gene_Cluster C	13.3451	WM_Score high	MSS/TP53-	intestinal	Stage III
GSM1523921	GSE62254	WM_Cluster D	Gene_Cluster D	-14.5367	WM_Score low	MSI	diffuse	Stage II
GSM1523922	GSE62254	WM_Cluster D	Gene_Cluster D	-8.6241	WM_Score low	MSS/TP53-	intestinal	Stage II
GSM1523923	GSE62254	WM_Cluster D	Gene_Cluster D	-20.0581	WM_Score low	MSS/TP53+	diffuse	Stage II
GSM1523924	GSE62254	WM_Cluster B	Gene_Cluster A	5.37187	WM_Score high	MSS/TP53-	diffuse	Stage II
GSM1523925	GSE62254	WM_Cluster A	Gene_Cluster A	-5.74004	WM_Score low	MSS/TP53-	diffuse	Stage II
GSM1523926	GSE62254	WM_Cluster A	Gene_Cluster A	-18.9478	WM_Score low	MSS/TP53+	intestinal	NA
GSM1523927	GSE62254	WM_Cluster B	Gene_Cluster A	-2.56469	WM_Score low	MSS/TP53+	diffuse	Stage II
GSM1523928	GSE62254	WM_Cluster C	Gene_Cluster A	-5.4516	WM_Score low	MSS/TP53-	intestinal	Stage II
GSM1523929	GSE62254	WM_Cluster D	Gene_Cluster D	-19.1914	WM_Score low	MSI	intestinal	Stage II
GSM1523930	GSE62254	WM_Cluster C	Gene_Cluster C	5.35715	WM_Score high	MSS/TP53-	intestinal	Stage II
GSM1523931	GSE62254	WM_Cluster C	Gene_Cluster A	-1.81319	WM_Score low	MSS/TP53+	diffuse	Stage II
GSM1523932	GSE62254	WM_Cluster A	Gene_Cluster D	-17.6444	WM_Score low	MSS/TP53-	intestinal	Stage II
GSM1523933	GSE62254	WM_Cluster A	Gene_Cluster A	-12.1785	WM_Score low	MSI	diffuse	Stage II
GSM1523934	GSE62254	WM_Cluster C	Gene_Cluster A	-4.76863	WM_Score low	MSS/TP53-	intestinal	Stage III
GSM1523935	GSE62254	WM_Cluster C	Gene_Cluster C	40.6211	WM_Score high	EMT	diffuse	Stage III
GSM1523936	GSE62254	WM_Cluster B	Gene_Cluster C	17.5594	WM_Score high	MSS/TP53+	diffuse	Stage II
GSM1523937	GSE62254	WM_Cluster B	Gene_Cluster A	-2.33157	WM_Score low	MSS/TP53+	intestinal	Stage II
GSM1523938	GSE62254	WM_Cluster B	Gene_Cluster B	51.0906	WM_Score high	EMT	diffuse	Stage III
GSM1523939	GSE62254	WM_Cluster B	Gene_Cluster B	70.3303	WM_Score high	EMT	diffuse	Stage III
GSM1523940	GSE62254	WM_Cluster C	Gene_Cluster A	-11.2195	WM_Score low	MSS/TP53-	intestinal	Stage III
GSM1523941	GSE62254	WM_Cluster A	Gene_Cluster D	-9.74853	WM_Score low	MSS/TP53-	diffuse	Stage II
GSM1523942	GSE62254	WM_Cluster A	Gene_Cluster A	-8.33585	WM_Score low	MSS/TP53-	intestinal	NA
GSM1523943	GSE62254	WM_Cluster A	Gene_Cluster A	-10.5595	WM_Score low	MSS/TP53-	diffuse	Stage III
GSM1523944	GSE62254	WM_Cluster D	Gene_Cluster D	-9.94978	WM_Score low	MSS/TP53+	diffuse	Stage II
GSM1523945	GSE62254	WM_Cluster B	Gene_Cluster C	22.665	WM_Score high	EMT	diffuse	Stage IV
GSM1523946	GSE62254	WM_Cluster A	Gene_Cluster A	-14.0734	WM_Score low	MSS/TP53+	intestinal	Stage II
GSM1523947	GSE62254	WM_Cluster A	Gene_Cluster D	-29.7874	WM_Score low	MSI	intestinal	Stage III
GSM1523948	GSE62254	WM_Cluster C	Gene_Cluster C	26.836	WM_Score high	EMT	diffuse	Stage III
GSM1523949	GSE62254	WM_Cluster C	Gene_Cluster B	51.4777	WM_Score high	EMT	diffuse	Stage III
GSM1523950	GSE62254	WM_Cluster D	Gene_Cluster D	-30.6302	WM_Score low	MSS/TP53-	intestinal	Stage II
GSM1523951	GSE62254	WM_Cluster A	Gene_Cluster A	1.71688	WM_Score high	MSS/TP53+	diffuse	Stage IV
GSM1523952	GSE62254	WM_Cluster B	Gene_Cluster A	-1.47966	WM_Score low	MSI	diffuse	Stage II
GSM1523953	GSE62254	WM_Cluster C	Gene_Cluster D	-20.6378	WM_Score low	MSS/TP53-	diffuse	Stage II
GSM1523954	GSE62254	WM_Cluster B	Gene_Cluster A	-4.96209	WM_Score low	MSS/TP53-	diffuse	Stage II
GSM1523955	GSE62254	WM_Cluster B	Gene_Cluster C	31.7566	WM_Score high	MSS/TP53+	mixed	Stage II
GSM1523956	GSE62254	WM_Cluster C	Gene_Cluster D	-11.0338	WM_Score low	MSS/TP53-	mixed	Stage II
GSM1523957	GSE62254	WM_Cluster B	Gene_Cluster A	-10.1772	WM_Score low	MSS/TP53+	intestinal	Stage II
GSM1523958	GSE62254	WM_Cluster B	Gene_Cluster A	4.3624	WM_Score high	MSS/TP53+	diffuse	Stage II
GSM1523959	GSE62254	WM_Cluster D	Gene_Cluster D	-21.6469	WM_Score low	MSS/TP53-	intestinal	Stage II
GSM1523960	GSE62254	WM_Cluster C	Gene_Cluster D	-15.222	WM_Score low	MSS/TP53-	intestinal	Stage II
GSM1523961	GSE62254	WM_Cluster C	Gene_Cluster D	-20.4389	WM_Score low	MSI	intestinal	Stage II
GSM1523962	GSE62254	WM_Cluster B	Gene_Cluster B	43.5702	WM_Score high	EMT	diffuse	Stage III
GSM1523963	GSE62254	WM_Cluster B	Gene_Cluster A	-3.9723	WM_Score low	MSS/TP53-	intestinal	Stage II
GSM1523964	GSE62254	WM_Cluster B	Gene_Cluster D	-16.8639	WM_Score low	MSI	intestinal	Stage II
GSM1523965	GSE62254	WM_Cluster A	Gene_Cluster C	12.2758	WM_Score high	EMT	diffuse	Stage III
GSM1523966	GSE62254	WM_Cluster D	Gene_Cluster D	-17.9533	WM_Score low	MSS/TP53-	diffuse	Stage II
GSM1523967	GSE62254	WM_Cluster B	Gene_Cluster A	-0.559925	WM_Score low	MSS/TP53+	diffuse	Stage II
GSM1523968	GSE62254	WM_Cluster C	Gene_Cluster B	62.5147	WM_Score high	EMT	diffuse	Stage III
GSM1523969	GSE62254	WM_Cluster B	Gene_Cluster C	20.4873	WM_Score high	MSS/TP53-	diffuse	Stage III
GSM1523970	GSE62254	WM_Cluster C	Gene_Cluster A	-8.02375	WM_Score low	MSS/TP53-	mixed	Stage II
GSM1523971	GSE62254	WM_Cluster A	Gene_Cluster B	51.8793	WM_Score high	EMT	diffuse	Stage III
GSM1523972	GSE62254	WM_Cluster C	Gene_Cluster C	3.64865	WM_Score high	MSS/TP53-	mixed	Stage II
GSM1523973	GSE62254	WM_Cluster D	Gene_Cluster A	-6.79232	WM_Score low	MSS/TP53-	diffuse	Stage II
GSM1523974	GSE62254	WM_Cluster C	Gene_Cluster D	-14.3126	WM_Score low	MSS/TP53-	intestinal	Stage II
GSM1523975	GSE62254	WM_Cluster A	Gene_Cluster C	26.8381	WM_Score high	EMT	diffuse	Stage III
GSM1523976	GSE62254	WM_Cluster C	Gene_Cluster A	-1.7555	WM_Score low	MSS/TP53-	mixed	Stage II
GSM1523977	GSE62254	WM_Cluster B	Gene_Cluster A	-5.53761	WM_Score low	MSS/TP53-	diffuse	Stage II
GSM1523978	GSE62254	WM_Cluster C	Gene_Cluster A	-5.83087	WM_Score low	MSS/TP53+	diffuse	Stage II
GSM1523979	GSE62254	WM_Cluster D	Gene_Cluster D	-24.2678	WM_Score low	MSI	intestinal	Stage III
GSM1523980	GSE62254	WM_Cluster B	Gene_Cluster C	12.4227	WM_Score high	MSS/TP53+	diffuse	Stage III
GSM1523981	GSE62254	WM_Cluster A	Gene_Cluster C	27.5738	WM_Score high	EMT	diffuse	Stage II
GSM1523982	GSE62254	WM_Cluster A	Gene_Cluster C	40.9809	WM_Score high	EMT	diffuse	Stage III
GSM1523983	GSE62254	WM_Cluster A	Gene_Cluster D	-8.18512	WM_Score low	MSI	diffuse	Stage II
GSM1523984	GSE62254	WM_Cluster C	Gene_Cluster A	9.63158	WM_Score high	EMT	diffuse	Stage II
GSM1523985	GSE62254	WM_Cluster C	Gene_Cluster A	-0.724124	WM_Score low	MSS/TP53+	intestinal	Stage II
GSM1523986	GSE62254	WM_Cluster B	Gene_Cluster C	15.3431	WM_Score high	MSS/TP53+	diffuse	Stage III
GSM1523987	GSE62254	WM_Cluster A	Gene_Cluster A	2.82694	WM_Score high	MSS/TP53-	diffuse	Stage III
GSM1523988	GSE62254	WM_Cluster B	Gene_Cluster B	86.6228	WM_Score high	EMT	diffuse	Stage II
GSM1523989	GSE62254	WM_Cluster B	Gene_Cluster C	15.6034	WM_Score high	MSS/TP53-	intestinal	Stage III
GSM1523990	GSE62254	WM_Cluster A	Gene_Cluster C	14.0797	WM_Score high	EMT	diffuse	Stage II
GSM1523991	GSE62254	WM_Cluster B	Gene_Cluster A	2.48366	WM_Score high	MSS/TP53-	intestinal	Stage II
GSM1523992	GSE62254	WM_Cluster A	Gene_Cluster A	-4.13771	WM_Score low	MSS/TP53+	diffuse	Stage III
GSM1523993	GSE62254	WM_Cluster B	Gene_Cluster A	-4.49954	WM_Score low	MSS/TP53-	intestinal	Stage II
GSM1523994	GSE62254	WM_Cluster B	Gene_Cluster A	2.27745	WM_Score high	MSS/TP53-	intestinal	Stage II
GSM1523995	GSE62254	WM_Cluster C	Gene_Cluster A	0.0185107	WM_Score high	MSS/TP53-	mixed	Stage II
GSM1523996	GSE62254	WM_Cluster B	Gene_Cluster C	10.5098	WM_Score high	MSS/TP53+	diffuse	Stage II
GSM1523997	GSE62254	WM_Cluster C	Gene_Cluster D	-16.5213	WM_Score low	MSS/TP53-	diffuse	Stage IV
GSM1523998	GSE62254	WM_Cluster A	Gene_Cluster A	-13.1554	WM_Score low	MSS/TP53-	intestinal	Stage II
GSM1523999	GSE62254	WM_Cluster C	Gene_Cluster A	-7.41802	WM_Score low	MSS/TP53-	intestinal	Stage II
GSM1524000	GSE62254	WM_Cluster A	Gene_Cluster A	-1.33502	WM_Score low	MSI	diffuse	Stage III
GSM1524001	GSE62254	WM_Cluster D	Gene_Cluster A	-10.3671	WM_Score low	MSS/TP53-	intestinal	Stage II
GSM1524002	GSE62254	WM_Cluster D	Gene_Cluster D	-20.0934	WM_Score low	MSI	mixed	Stage III
GSM1524003	GSE62254	WM_Cluster C	Gene_Cluster A	-9.36794	WM_Score low	MSS/TP53-	intestinal	Stage II
GSM1524004	GSE62254	WM_Cluster D	Gene_Cluster A	-4.08488	WM_Score low	MSS/TP53-	diffuse	Stage IV
GSM1524005	GSE62254	WM_Cluster A	Gene_Cluster D	-16.1813	WM_Score low	MSS/TP53-	intestinal	Stage II
GSM1524006	GSE62254	WM_Cluster B	Gene_Cluster B	71.0534	WM_Score high	EMT	diffuse	Stage II
GSM1524007	GSE62254	WM_Cluster A	Gene_Cluster A	-7.38992	WM_Score low	MSS/TP53-	diffuse	Stage III
GSM1524008	GSE62254	WM_Cluster C	Gene_Cluster A	-16.5975	WM_Score low	MSI	diffuse	Stage III
GSM1524009	GSE62254	WM_Cluster B	Gene_Cluster C	17.3267	WM_Score high	MSS/TP53-	diffuse	Stage II
GSM1524010	GSE62254	WM_Cluster B	Gene_Cluster B	38.0238	WM_Score high	EMT	diffuse	Stage II
GSM1524011	GSE62254	WM_Cluster A	Gene_Cluster A	-14.4043	WM_Score low	MSS/TP53-	intestinal	Stage II
GSM1524012	GSE62254	WM_Cluster D	Gene_Cluster D	-18.2914	WM_Score low	MSS/TP53-	diffuse	Stage III
GSM1524013	GSE62254	WM_Cluster A	Gene_Cluster A	-10.4324	WM_Score low	MSS/TP53-	intestinal	Stage II
GSM1524014	GSE62254	WM_Cluster C	Gene_Cluster A	-14.5707	WM_Score low	MSS/TP53-	intestinal	Stage IV
GSM1524015	GSE62254	WM_Cluster A	Gene_Cluster A	-5.28434	WM_Score low	MSS/TP53-	intestinal	Stage IV
GSM1524016	GSE62254	WM_Cluster A	Gene_Cluster A	-6.95975	WM_Score low	MSS/TP53+	diffuse	Stage III
GSM1524017	GSE62254	WM_Cluster D	Gene_Cluster D	-19.7059	WM_Score low	MSS/TP53-	intestinal	Stage II
GSM1524018	GSE62254	WM_Cluster D	Gene_Cluster D	-17.0338	WM_Score low	MSS/TP53+	mixed	Stage III
GSM1524019	GSE62254	WM_Cluster B	Gene_Cluster A	-0.463386	WM_Score high	MSS/TP53-	diffuse	Stage III
GSM1524020	GSE62254	WM_Cluster B	Gene_Cluster A	-4.10684	WM_Score low	MSS/TP53+	intestinal	Stage II
GSM1524021	GSE62254	WM_Cluster A	Gene_Cluster A	5.27239	WM_Score high	MSS/TP53+	diffuse	Stage III
GSM1524022	GSE62254	WM_Cluster A	Gene_Cluster C	21.85	WM_Score high	MSS/TP53-	diffuse	Stage III
GSM1524023	GSE62254	WM_Cluster A	Gene_Cluster D	-14.4532	WM_Score low	MSS/TP53-	intestinal	Stage IV
GSM1524024	GSE62254	WM_Cluster B	Gene_Cluster A	3.44158	WM_Score high	MSS/TP53+	diffuse	Stage III
GSM1524025	GSE62254	WM_Cluster B	Gene_Cluster A	0.287648	WM_Score high	MSI	diffuse	Stage II
GSM1524026	GSE62254	WM_Cluster C	Gene_Cluster C	30.3536	WM_Score high	EMT	diffuse	Stage III
GSM1524027	GSE62254	WM_Cluster C	Gene_Cluster A	-1.45466	WM_Score low	MSS/TP53-	diffuse	Stage III
GSM1524028	GSE62254	WM_Cluster A	Gene_Cluster D	-14.2418	WM_Score low	MSS/TP53+	intestinal	Stage II
GSM1524029	GSE62254	WM_Cluster C	Gene_Cluster B	79.1207	WM_Score high	EMT	diffuse	Stage IV
GSM1524030	GSE62254	WM_Cluster A	Gene_Cluster B	85.752	WM_Score high	EMT	diffuse	Stage III
GSM1524031	GSE62254	WM_Cluster A	Gene_Cluster A	-11.0627	WM_Score low	MSS/TP53+	intestinal	Stage II
GSM1524032	GSE62254	WM_Cluster A	Gene_Cluster A	-9.32036	WM_Score low	MSI	intestinal	Stage IV
GSM1524033	GSE62254	WM_Cluster C	Gene_Cluster A	-0.161169	WM_Score high	MSS/TP53+	intestinal	Stage II
GSM1524034	GSE62254	WM_Cluster A	Gene_Cluster C	13.7439	WM_Score high	MSS/TP53+	intestinal	Stage III
GSM1524035	GSE62254	WM_Cluster B	Gene_Cluster B	40.9108	WM_Score high	EMT	mixed	Stage III
GSM1524036	GSE62254	WM_Cluster C	Gene_Cluster A	-7.91085	WM_Score low	MSS/TP53-	intestinal	Stage III
GSM1524037	GSE62254	WM_Cluster C	Gene_Cluster C	19.269	WM_Score high	MSS/TP53-	intestinal	Stage III
GSM1524038	GSE62254	WM_Cluster A	Gene_Cluster A	0.332664	WM_Score high	MSS/TP53+	diffuse	Stage II
GSM1524039	GSE62254	WM_Cluster B	Gene_Cluster C	24.9737	WM_Score high	EMT	diffuse	Stage III
GSM1524040	GSE62254	WM_Cluster D	Gene_Cluster D	-13.4235	WM_Score low	MSS/TP53-	diffuse	Stage III
GSM1524041	GSE62254	WM_Cluster D	Gene_Cluster D	-11.1878	WM_Score low	MSI	intestinal	Stage II
GSM1524042	GSE62254	WM_Cluster B	Gene_Cluster A	3.94231	WM_Score high	MSS/TP53-	diffuse	Stage II
GSM1524043	GSE62254	WM_Cluster A	Gene_Cluster D	-11.8939	WM_Score low	MSS/TP53+	diffuse	Stage II
GSM1524044	GSE62254	WM_Cluster A	Gene_Cluster C	9.66598	WM_Score high	MSS/TP53-	intestinal	Stage II
GSM1524045	GSE62254	WM_Cluster A	Gene_Cluster A	0.85961	WM_Score high	MSS/TP53+	intestinal	Stage II
GSM1524046	GSE62254	WM_Cluster A	Gene_Cluster C	16.1348	WM_Score high	MSS/TP53-	diffuse	Stage II
GSM1524047	GSE62254	WM_Cluster C	Gene_Cluster C	8.21003	WM_Score high	MSS/TP53+	diffuse	Stage II
GSM1524048	GSE62254	WM_Cluster C	Gene_Cluster A	-1.6864	WM_Score low	MSI	intestinal	Stage II
GSM1524049	GSE62254	WM_Cluster A	Gene_Cluster C	7.3697	WM_Score high	MSS/TP53+	intestinal	Stage II
GSM1524050	GSE62254	WM_Cluster A	Gene_Cluster A	-8.57329	WM_Score low	MSS/TP53+	intestinal	Stage II
GSM1524051	GSE62254	WM_Cluster B	Gene_Cluster A	-2.28692	WM_Score low	MSS/TP53-	diffuse	Stage II
GSM1524052	GSE62254	WM_Cluster A	Gene_Cluster C	26.1562	WM_Score high	MSS/TP53-	diffuse	Stage II
GSM1524053	GSE62254	WM_Cluster C	Gene_Cluster A	-5.14619	WM_Score low	MSS/TP53+	intestinal	Stage II
GSM1524054	GSE62254	WM_Cluster A	Gene_Cluster D	-23.2207	WM_Score low	MSI	intestinal	Stage II
GSM1524055	GSE62254	WM_Cluster C	Gene_Cluster C	11.398	WM_Score high	MSS/TP53+	intestinal	Stage II
GSM1524056	GSE62254	WM_Cluster C	Gene_Cluster A	0.482874	WM_Score high	MSS/TP53-	intestinal	Stage II
GSM1524057	GSE62254	WM_Cluster B	Gene_Cluster B	77.9568	WM_Score high	EMT	intestinal	Stage IV
GSM1524058	GSE62254	WM_Cluster C	Gene_Cluster C	32.5701	WM_Score high	EMT	intestinal	Stage II
GSM1524059	GSE62254	WM_Cluster A	Gene_Cluster C	24.733	WM_Score high	EMT	diffuse	Stage III
GSM1524060	GSE62254	WM_Cluster C	Gene_Cluster A	-6.10116	WM_Score low	MSS/TP53+	intestinal	Stage II
GSM1524061	GSE62254	WM_Cluster A	Gene_Cluster D	-23.3639	WM_Score low	MSI	intestinal	Stage II
GSM1524062	GSE62254	WM_Cluster C	Gene_Cluster B	71.7039	WM_Score high	EMT	diffuse	Stage III
GSM1524068	GSE62254	WM_Cluster C	Gene_Cluster A	-14.7796	WM_Score low	MSI	intestinal	Stage II
GSM1524069	GSE62254	WM_Cluster A	Gene_Cluster D	-24.4192	WM_Score low	MSI	intestinal	Stage II
GSM1524070	GSE62254	WM_Cluster C	Gene_Cluster A	0.30694	WM_Score high	MSS/TP53+	intestinal	Stage II
GSM1524071	GSE62254	WM_Cluster C	Gene_Cluster C	-2.04588	WM_Score low	MSS/TP53+	intestinal	Stage IV
GSM1524072	GSE62254	WM_Cluster C	Gene_Cluster C	8.46431	WM_Score high	MSS/TP53-	diffuse	Stage III
GSM2235556	GSE84437	WM_Cluster C	Gene_Cluster C	5.913	WM_Score high	NA	NA	Stage III
GSM2235557	GSE84437	WM_Cluster C	Gene_Cluster C	24.4992	WM_Score high	NA	NA	Stage IV
GSM2235558	GSE84437	WM_Cluster C	Gene_Cluster B	33.1532	WM_Score high	NA	NA	Stage IV
GSM2235559	GSE84437	WM_Cluster C	Gene_Cluster C	18.8556	WM_Score high	NA	NA	Stage III
GSM2235560	GSE84437	WM_Cluster C	Gene_Cluster B	38.2002	WM_Score high	NA	NA	Stage IV
GSM2235561	GSE84437	WM_Cluster A	Gene_Cluster C	17.6137	WM_Score high	NA	NA	Stage IV
GSM2235562	GSE84437	WM_Cluster C	Gene_Cluster A	-10.4816	WM_Score low	NA	NA	Stage IV
GSM2235563	GSE84437	WM_Cluster C	Gene_Cluster C	-2.45264	WM_Score low	NA	NA	Stage III
GSM2235564	GSE84437	WM_Cluster C	Gene_Cluster D	-22.1425	WM_Score low	NA	NA	Stage III
GSM2235565	GSE84437	WM_Cluster C	Gene_Cluster B	59.6345	WM_Score high	NA	NA	Stage IV
GSM2235566	GSE84437	WM_Cluster C	Gene_Cluster C	16.6928	WM_Score high	NA	NA	Stage IV
GSM2235567	GSE84437	WM_Cluster C	Gene_Cluster B	33.4607	WM_Score high	NA	NA	Stage IV
GSM2235568	GSE84437	WM_Cluster C	Gene_Cluster C	-5.9429	WM_Score low	NA	NA	Stage III
GSM2235569	GSE84437	WM_Cluster C	Gene_Cluster D	-23.3534	WM_Score low	NA	NA	Stage IV
GSM2235570	GSE84437	WM_Cluster B	Gene_Cluster C	9.97192	WM_Score high	NA	NA	Stage IV
GSM2235571	GSE84437	WM_Cluster C	Gene_Cluster A	-8.97487	WM_Score low	NA	NA	Stage III
GSM2235572	GSE84437	WM_Cluster C	Gene_Cluster B	36.6305	WM_Score high	NA	NA	Stage IV
GSM2235573	GSE84437	WM_Cluster C	Gene_Cluster C	16.1102	WM_Score high	NA	NA	Stage IV
GSM2235574	GSE84437	WM_Cluster C	Gene_Cluster C	11.9821	WM_Score high	NA	NA	Stage IV
GSM2235575	GSE84437	WM_Cluster C	Gene_Cluster A	-14.3349	WM_Score low	NA	NA	Stage III
GSM2235576	GSE84437	WM_Cluster C	Gene_Cluster A	-16.3828	WM_Score low	NA	NA	Stage III
GSM2235577	GSE84437	WM_Cluster C	Gene_Cluster B	31.9147	WM_Score high	NA	NA	Stage IV
GSM2235578	GSE84437	WM_Cluster C	Gene_Cluster A	-11.2608	WM_Score low	NA	NA	Stage IV
GSM2235579	GSE84437	WM_Cluster C	Gene_Cluster C	14.9578	WM_Score high	NA	NA	Stage III
GSM2235580	GSE84437	WM_Cluster A	Gene_Cluster C	24.0524	WM_Score high	NA	NA	Stage IV
GSM2235582	GSE84437	WM_Cluster C	Gene_Cluster C	10.003	WM_Score high	NA	NA	Stage IV
GSM2235584	GSE84437	WM_Cluster B	Gene_Cluster C	-1.52462	WM_Score low	NA	NA	Stage IV
GSM2235585	GSE84437	WM_Cluster A	Gene_Cluster A	-2.97334	WM_Score low	NA	NA	Stage III
GSM2235586	GSE84437	WM_Cluster A	Gene_Cluster C	20.3334	WM_Score high	NA	NA	Stage IV
GSM2235587	GSE84437	WM_Cluster C	Gene_Cluster C	8.86788	WM_Score high	NA	NA	Stage IV
GSM2235588	GSE84437	WM_Cluster C	Gene_Cluster B	42.2493	WM_Score high	NA	NA	Stage IV
GSM2235589	GSE84437	WM_Cluster C	Gene_Cluster A	-10.7092	WM_Score low	NA	NA	Stage IV
GSM2235593	GSE84437	WM_Cluster C	Gene_Cluster A	-20.889	WM_Score low	NA	NA	Stage IV
GSM2235595	GSE84437	WM_Cluster C	Gene_Cluster C	20.8417	WM_Score high	NA	NA	Stage IV
GSM2235596	GSE84437	WM_Cluster A	Gene_Cluster C	8.56287	WM_Score high	NA	NA	Stage III
GSM2235597	GSE84437	WM_Cluster C	Gene_Cluster D	-26.166	WM_Score low	NA	NA	Stage II
GSM2235598	GSE84437	WM_Cluster C	Gene_Cluster C	21.2913	WM_Score high	NA	NA	Stage III
GSM2235599	GSE84437	WM_Cluster A	Gene_Cluster A	-1.04886	WM_Score low	NA	NA	Stage III
GSM2235600	GSE84437	WM_Cluster A	Gene_Cluster C	6.74685	WM_Score high	NA	NA	Stage IV
GSM2235601	GSE84437	WM_Cluster A	Gene_Cluster C	23.3817	WM_Score high	NA	NA	Stage IV
GSM2235602	GSE84437	WM_Cluster C	Gene_Cluster B	34.0218	WM_Score high	NA	NA	Stage III
GSM2235603	GSE84437	WM_Cluster C	Gene_Cluster A	-7.57147	WM_Score low	NA	NA	Stage IV
GSM2235604	GSE84437	WM_Cluster A	Gene_Cluster A	-11.4214	WM_Score low	NA	NA	Stage III
GSM2235605	GSE84437	WM_Cluster A	Gene_Cluster C	15.4869	WM_Score high	NA	NA	Stage IV
GSM2235606	GSE84437	WM_Cluster B	Gene_Cluster C	29.93	WM_Score high	NA	NA	Stage IV
GSM2235607	GSE84437	WM_Cluster A	Gene_Cluster C	8.60359	WM_Score high	NA	NA	Stage III
GSM2235608	GSE84437	WM_Cluster D	Gene_Cluster D	-30.6592	WM_Score low	NA	NA	Stage III
GSM2235609	GSE84437	WM_Cluster A	Gene_Cluster C	17.8288	WM_Score high	NA	NA	Stage IV
GSM2235610	GSE84437	WM_Cluster B	Gene_Cluster B	35.9416	WM_Score high	NA	NA	Stage IV
GSM2235611	GSE84437	WM_Cluster A	Gene_Cluster A	-1.59249	WM_Score low	NA	NA	Stage IV
GSM2235612	GSE84437	WM_Cluster A	Gene_Cluster B	43.4146	WM_Score high	NA	NA	Stage IV
GSM2235613	GSE84437	WM_Cluster D	Gene_Cluster D	-27.4741	WM_Score low	NA	NA	Stage II
GSM2235614	GSE84437	WM_Cluster B	Gene_Cluster A	-15.255	WM_Score low	NA	NA	Stage IV
GSM2235615	GSE84437	WM_Cluster C	Gene_Cluster C	14.5013	WM_Score high	NA	NA	Stage III
GSM2235616	GSE84437	WM_Cluster A	Gene_Cluster A	-2.28205	WM_Score low	NA	NA	Stage IV
GSM2235617	GSE84437	WM_Cluster D	Gene_Cluster D	-20.4546	WM_Score low	NA	NA	Stage IV
GSM2235618	GSE84437	WM_Cluster A	Gene_Cluster A	-9.47489	WM_Score low	NA	NA	Stage IV
GSM2235619	GSE84437	WM_Cluster C	Gene_Cluster A	2.03788	WM_Score high	NA	NA	Stage IV
GSM2235620	GSE84437	WM_Cluster A	Gene_Cluster A	-5.09283	WM_Score low	NA	NA	Stage III
GSM2235621	GSE84437	WM_Cluster A	Gene_Cluster A	-2.91896	WM_Score low	NA	NA	Stage IV
GSM2235622	GSE84437	WM_Cluster A	Gene_Cluster C	25.5006	WM_Score high	NA	NA	Stage III
GSM2235623	GSE84437	WM_Cluster D	Gene_Cluster D	-21.7435	WM_Score low	NA	NA	Stage III
GSM2235624	GSE84437	WM_Cluster D	Gene_Cluster D	-26.1408	WM_Score low	NA	NA	Stage III
GSM2235625	GSE84437	WM_Cluster A	Gene_Cluster C	28.3464	WM_Score high	NA	NA	Stage IV
GSM2235626	GSE84437	WM_Cluster A	Gene_Cluster C	22.1522	WM_Score high	NA	NA	Stage IV
GSM2235627	GSE84437	WM_Cluster A	Gene_Cluster A	-5.83944	WM_Score low	NA	NA	Stage III
GSM2235628	GSE84437	WM_Cluster B	Gene_Cluster C	18.6672	WM_Score high	NA	NA	Stage III
GSM2235629	GSE84437	WM_Cluster A	Gene_Cluster C	12.3123	WM_Score high	NA	NA	Stage IV
GSM2235630	GSE84437	WM_Cluster B	Gene_Cluster C	33.4289	WM_Score high	NA	NA	Stage IV
GSM2235631	GSE84437	WM_Cluster A	Gene_Cluster C	16.4305	WM_Score high	NA	NA	Stage IV
GSM2235632	GSE84437	WM_Cluster A	Gene_Cluster A	-12.7274	WM_Score low	NA	NA	Stage III
GSM2235633	GSE84437	WM_Cluster A	Gene_Cluster C	30.4175	WM_Score high	NA	NA	Stage IV
GSM2235634	GSE84437	WM_Cluster A	Gene_Cluster A	-3.41309	WM_Score low	NA	NA	Stage IV
GSM2235635	GSE84437	WM_Cluster A	Gene_Cluster A	-17.0623	WM_Score low	NA	NA	Stage II
GSM2235636	GSE84437	WM_Cluster A	Gene_Cluster C	29.8001	WM_Score high	NA	NA	Stage IV
GSM2235637	GSE84437	WM_Cluster C	Gene_Cluster A	-10.1877	WM_Score low	NA	NA	Stage IV
GSM2235695	GSE84437	WM_Cluster A	Gene_Cluster D	-28.3952	WM_Score low	NA	NA	Stage IV
GSM2235696	GSE84437	WM_Cluster C	Gene_Cluster D	-29.9546	WM_Score low	NA	NA	Stage IV
GSM2235697	GSE84437	WM_Cluster C	Gene_Cluster D	-19.0721	WM_Score low	NA	NA	Stage III
GSM2235698	GSE84437	WM_Cluster A	Gene_Cluster A	-13.1595	WM_Score low	NA	NA	Stage III
GSM2235699	GSE84437	WM_Cluster D	Gene_Cluster A	-1.48169	WM_Score low	NA	NA	Stage IV
GSM2235700	GSE84437	WM_Cluster D	Gene_Cluster A	-0.627713	WM_Score low	NA	NA	Stage IV
GSM2235701	GSE84437	WM_Cluster C	Gene_Cluster D	-30.6092	WM_Score low	NA	NA	Stage III
GSM2235702	GSE84437	WM_Cluster B	Gene_Cluster C	13.5192	WM_Score high	NA	NA	Stage IV
GSM2235703	GSE84437	WM_Cluster A	Gene_Cluster A	8.19514	WM_Score high	NA	NA	Stage IV
GSM2235704	GSE84437	WM_Cluster A	Gene_Cluster A	7.9238	WM_Score high	NA	NA	Stage IV
GSM2235705	GSE84437	WM_Cluster A	Gene_Cluster A	-6.13182	WM_Score low	NA	NA	Stage IV
GSM2235706	GSE84437	WM_Cluster A	Gene_Cluster D	-20.1306	WM_Score low	NA	NA	Stage IV
GSM2235707	GSE84437	WM_Cluster D	Gene_Cluster D	-24.3898	WM_Score low	NA	NA	Stage II
GSM2235708	GSE84437	WM_Cluster C	Gene_Cluster D	-15.7446	WM_Score low	NA	NA	Stage IV
GSM2235709	GSE84437	WM_Cluster C	Gene_Cluster D	-18.0842	WM_Score low	NA	NA	Stage II
GSM2235710	GSE84437	WM_Cluster B	Gene_Cluster A	1.34622	WM_Score high	NA	NA	Stage IV
GSM2235711	GSE84437	WM_Cluster D	Gene_Cluster D	-22.527	WM_Score low	NA	NA	Stage IV
GSM2235712	GSE84437	WM_Cluster C	Gene_Cluster D	-27.5996	WM_Score low	NA	NA	Stage II
GSM2235713	GSE84437	WM_Cluster A	Gene_Cluster C	28.7182	WM_Score high	NA	NA	Stage IV
GSM2235714	GSE84437	WM_Cluster D	Gene_Cluster D	-24.5191	WM_Score low	NA	NA	Stage II
GSM2235715	GSE84437	WM_Cluster D	Gene_Cluster D	-25.8446	WM_Score low	NA	NA	Stage IV
GSM2235716	GSE84437	WM_Cluster D	Gene_Cluster D	-4.41754	WM_Score low	NA	NA	Stage III
GSM2235717	GSE84437	WM_Cluster B	Gene_Cluster C	28.0734	WM_Score high	NA	NA	Stage IV
GSM2235718	GSE84437	WM_Cluster B	Gene_Cluster C	2.0061	WM_Score high	NA	NA	Stage IV
GSM2235719	GSE84437	WM_Cluster A	Gene_Cluster A	-7.38455	WM_Score low	NA	NA	Stage IV
GSM2235720	GSE84437	WM_Cluster C	Gene_Cluster A	-6.37892	WM_Score low	NA	NA	Stage I
GSM2235721	GSE84437	WM_Cluster A	Gene_Cluster A	-5.52267	WM_Score low	NA	NA	Stage II
GSM2235722	GSE84437	WM_Cluster B	Gene_Cluster A	-2.45129	WM_Score low	NA	NA	Stage IV
GSM2235723	GSE84437	WM_Cluster B	Gene_Cluster A	-13.766	WM_Score low	NA	NA	Stage III
GSM2235724	GSE84437	WM_Cluster A	Gene_Cluster A	1.50412	WM_Score high	NA	NA	Stage III
GSM2235725	GSE84437	WM_Cluster B	Gene_Cluster A	-7.61956	WM_Score low	NA	NA	Stage IV
GSM2235726	GSE84437	WM_Cluster B	Gene_Cluster C	10.4666	WM_Score high	NA	NA	Stage IV
GSM2235727	GSE84437	WM_Cluster B	Gene_Cluster A	-5.80683	WM_Score low	NA	NA	Stage IV
GSM2235728	GSE84437	WM_Cluster B	Gene_Cluster C	13.8549	WM_Score high	NA	NA	Stage IV
GSM2235729	GSE84437	WM_Cluster B	Gene_Cluster A	9.34927	WM_Score high	NA	NA	Stage IV
GSM2235730	GSE84437	WM_Cluster D	Gene_Cluster D	-25.9998	WM_Score low	NA	NA	Stage I
GSM2235731	GSE84437	WM_Cluster C	Gene_Cluster D	-33.7675	WM_Score low	NA	NA	Stage II
GSM2235732	GSE84437	WM_Cluster D	Gene_Cluster A	-5.97123	WM_Score low	NA	NA	Stage II
GSM2235733	GSE84437	WM_Cluster B	Gene_Cluster A	1.84319	WM_Score high	NA	NA	Stage III
GSM2235734	GSE84437	WM_Cluster C	Gene_Cluster A	-12.6692	WM_Score low	NA	NA	Stage IV
GSM2235735	GSE84437	WM_Cluster D	Gene_Cluster D	-20.8726	WM_Score low	NA	NA	Stage III
GSM2235736	GSE84437	WM_Cluster D	Gene_Cluster D	-18.9787	WM_Score low	NA	NA	Stage IV
GSM2235737	GSE84437	WM_Cluster C	Gene_Cluster A	-6.80077	WM_Score low	NA	NA	Stage IV
GSM2235738	GSE84437	WM_Cluster C	Gene_Cluster A	-18.7264	WM_Score low	NA	NA	Stage IV
GSM2235739	GSE84437	WM_Cluster D	Gene_Cluster D	-25.9587	WM_Score low	NA	NA	Stage III
GSM2235740	GSE84437	WM_Cluster B	Gene_Cluster A	-14.6777	WM_Score low	NA	NA	Stage III
GSM2235741	GSE84437	WM_Cluster B	Gene_Cluster A	-0.976477	WM_Score low	NA	NA	Stage IV
GSM2235742	GSE84437	WM_Cluster C	Gene_Cluster A	-12.0278	WM_Score low	NA	NA	Stage IV
GSM2235743	GSE84437	WM_Cluster C	Gene_Cluster A	-9.4322	WM_Score low	NA	NA	Stage IV
GSM2235744	GSE84437	WM_Cluster B	Gene_Cluster C	2.40582	WM_Score high	NA	NA	Stage IV
GSM2235745	GSE84437	WM_Cluster D	Gene_Cluster C	19.5327	WM_Score high	NA	NA	Stage IV
GSM2235746	GSE84437	WM_Cluster A	Gene_Cluster A	-5.10614	WM_Score low	NA	NA	Stage III
GSM2235747	GSE84437	WM_Cluster A	Gene_Cluster D	-14.7526	WM_Score low	NA	NA	Stage IV
GSM2235748	GSE84437	WM_Cluster C	Gene_Cluster A	6.64257	WM_Score high	NA	NA	Stage IV
GSM2235749	GSE84437	WM_Cluster C	Gene_Cluster D	-27.6734	WM_Score low	NA	NA	Stage IV
GSM2235750	GSE84437	WM_Cluster C	Gene_Cluster A	-4.88151	WM_Score low	NA	NA	Stage IV
GSM2235751	GSE84437	WM_Cluster B	Gene_Cluster D	-27.2757	WM_Score low	NA	NA	Stage III
GSM2235752	GSE84437	WM_Cluster B	Gene_Cluster D	-19.5188	WM_Score low	NA	NA	Stage IV
GSM2235753	GSE84437	WM_Cluster A	Gene_Cluster A	4.24083	WM_Score high	NA	NA	Stage IV
GSM2235754	GSE84437	WM_Cluster B	Gene_Cluster C	8.2475	WM_Score high	NA	NA	Stage IV
GSM2235755	GSE84437	WM_Cluster A	Gene_Cluster B	46.7717	WM_Score high	NA	NA	Stage IV
GSM2235756	GSE84437	WM_Cluster A	Gene_Cluster A	7.57102	WM_Score high	NA	NA	Stage IV
GSM2235757	GSE84437	WM_Cluster D	Gene_Cluster A	-8.5236	WM_Score low	NA	NA	Stage IV
GSM2235758	GSE84437	WM_Cluster B	Gene_Cluster D	-16.9437	WM_Score low	NA	NA	Stage IV
GSM2235759	GSE84437	WM_Cluster B	Gene_Cluster C	34.4079	WM_Score high	NA	NA	Stage IV
GSM2235760	GSE84437	WM_Cluster D	Gene_Cluster A	-1.478	WM_Score low	NA	NA	Stage IV
GSM2235761	GSE84437	WM_Cluster C	Gene_Cluster B	34.2414	WM_Score high	NA	NA	Stage IV
GSM2235762	GSE84437	WM_Cluster A	Gene_Cluster D	-16.1029	WM_Score low	NA	NA	Stage IV
GSM2235763	GSE84437	WM_Cluster B	Gene_Cluster D	-13.2662	WM_Score low	NA	NA	Stage IV
GSM2235764	GSE84437	WM_Cluster C	Gene_Cluster A	-19.6213	WM_Score low	NA	NA	Stage IV
GSM2235765	GSE84437	WM_Cluster B	Gene_Cluster C	19.7467	WM_Score high	NA	NA	Stage IV
GSM2235766	GSE84437	WM_Cluster C	Gene_Cluster D	-23.0375	WM_Score low	NA	NA	Stage IV
GSM2235767	GSE84437	WM_Cluster B	Gene_Cluster B	68.5035	WM_Score high	NA	NA	Stage IV
GSM2235768	GSE84437	WM_Cluster D	Gene_Cluster A	-2.32864	WM_Score low	NA	NA	Stage IV
GSM2235769	GSE84437	WM_Cluster C	Gene_Cluster D	-20.9204	WM_Score low	NA	NA	Stage III
GSM2235770	GSE84437	WM_Cluster D	Gene_Cluster A	3.71986	WM_Score high	NA	NA	Stage III
GSM2235771	GSE84437	WM_Cluster B	Gene_Cluster C	10.7047	WM_Score high	NA	NA	Stage IV
GSM2235772	GSE84437	WM_Cluster B	Gene_Cluster A	6.34749	WM_Score high	NA	NA	Stage IV
GSM2235773	GSE84437	WM_Cluster B	Gene_Cluster A	5.88863	WM_Score high	NA	NA	Stage IV
GSM2235774	GSE84437	WM_Cluster B	Gene_Cluster A	5.71151	WM_Score high	NA	NA	Stage IV
GSM2235775	GSE84437	WM_Cluster B	Gene_Cluster C	11.8068	WM_Score high	NA	NA	Stage IV
GSM2235776	GSE84437	WM_Cluster B	Gene_Cluster C	12.8024	WM_Score high	NA	NA	Stage IV
GSM2235777	GSE84437	WM_Cluster B	Gene_Cluster A	2.66611	WM_Score high	NA	NA	Stage IV
GSM2235778	GSE84437	WM_Cluster A	Gene_Cluster A	-10.5996	WM_Score low	NA	NA	Stage IV
GSM2235779	GSE84437	WM_Cluster A	Gene_Cluster D	-29.6758	WM_Score low	NA	NA	Stage IV
GSM2235780	GSE84437	WM_Cluster B	Gene_Cluster A	-8.99071	WM_Score low	NA	NA	Stage IV
GSM2235781	GSE84437	WM_Cluster D	Gene_Cluster D	-12.5542	WM_Score low	NA	NA	Stage I
GSM2235782	GSE84437	WM_Cluster A	Gene_Cluster A	8.60816	WM_Score high	NA	NA	Stage IV
GSM2235783	GSE84437	WM_Cluster A	Gene_Cluster C	18.1638	WM_Score high	NA	NA	Stage III
GSM2235784	GSE84437	WM_Cluster A	Gene_Cluster D	-24.7234	WM_Score low	NA	NA	Stage II
GSM2235785	GSE84437	WM_Cluster D	Gene_Cluster D	-23.1933	WM_Score low	NA	NA	Stage III
GSM2235786	GSE84437	WM_Cluster B	Gene_Cluster B	44.9052	WM_Score high	NA	NA	Stage IV
GSM2235787	GSE84437	WM_Cluster B	Gene_Cluster C	16.8917	WM_Score high	NA	NA	Stage IV
GSM2235788	GSE84437	WM_Cluster D	Gene_Cluster D	-24.4223	WM_Score low	NA	NA	Stage II
GSM2235789	GSE84437	WM_Cluster A	Gene_Cluster D	-6.95306	WM_Score low	NA	NA	Stage IV
GSM2235790	GSE84437	WM_Cluster C	Gene_Cluster A	-4.29946	WM_Score low	NA	NA	Stage IV
GSM2235791	GSE84437	WM_Cluster B	Gene_Cluster C	24.3629	WM_Score high	NA	NA	Stage IV
GSM2235792	GSE84437	WM_Cluster A	Gene_Cluster D	-3.73817	WM_Score low	NA	NA	Stage IV
GSM2235793	GSE84437	WM_Cluster A	Gene_Cluster C	33.5332	WM_Score high	NA	NA	Stage III
GSM2235794	GSE84437	WM_Cluster D	Gene_Cluster D	-7.67762	WM_Score low	NA	NA	Stage I
GSM2235795	GSE84437	WM_Cluster A	Gene_Cluster A	-4.51081	WM_Score low	NA	NA	Stage IV
GSM2235796	GSE84437	WM_Cluster B	Gene_Cluster C	20.1524	WM_Score high	NA	NA	Stage IV
GSM2235797	GSE84437	WM_Cluster C	Gene_Cluster D	-23.8523	WM_Score low	NA	NA	Stage III
GSM2235798	GSE84437	WM_Cluster C	Gene_Cluster D	-27.5664	WM_Score low	NA	NA	Stage IV
GSM2235799	GSE84437	WM_Cluster D	Gene_Cluster D	-29.2722	WM_Score low	NA	NA	Stage IV
GSM2235800	GSE84437	WM_Cluster A	Gene_Cluster C	25.6298	WM_Score high	NA	NA	Stage III
GSM2235801	GSE84437	WM_Cluster B	Gene_Cluster C	15.4777	WM_Score high	NA	NA	Stage II
GSM2235802	GSE84437	WM_Cluster D	Gene_Cluster D	-26.9843	WM_Score low	NA	NA	Stage I
GSM2235803	GSE84437	WM_Cluster D	Gene_Cluster D	-19.7621	WM_Score low	NA	NA	Stage III
GSM2235804	GSE84437	WM_Cluster A	Gene_Cluster C	29.387	WM_Score high	NA	NA	Stage IV
GSM2235805	GSE84437	WM_Cluster A	Gene_Cluster C	37.6363	WM_Score high	NA	NA	Stage IV
GSM2235806	GSE84437	WM_Cluster A	Gene_Cluster A	-9.29791	WM_Score low	NA	NA	Stage IV
GSM2235807	GSE84437	WM_Cluster A	Gene_Cluster A	-6.82896	WM_Score low	NA	NA	Stage IV
GSM2235808	GSE84437	WM_Cluster D	Gene_Cluster D	-8.54541	WM_Score low	NA	NA	Stage IV
GSM2235809	GSE84437	WM_Cluster D	Gene_Cluster A	-2.42988	WM_Score low	NA	NA	Stage IV
GSM2235810	GSE84437	WM_Cluster D	Gene_Cluster D	-28.0944	WM_Score low	NA	NA	Stage IV
GSM2235811	GSE84437	WM_Cluster B	Gene_Cluster D	-8.24652	WM_Score low	NA	NA	Stage IV
GSM2235812	GSE84437	WM_Cluster D	Gene_Cluster D	-15.0013	WM_Score low	NA	NA	Stage IV
GSM2235813	GSE84437	WM_Cluster B	Gene_Cluster A	-8.58281	WM_Score low	NA	NA	Stage III
GSM2235814	GSE84437	WM_Cluster B	Gene_Cluster D	-3.98773	WM_Score low	NA	NA	Stage IV
GSM2235815	GSE84437	WM_Cluster D	Gene_Cluster D	-30.9186	WM_Score low	NA	NA	Stage IV
GSM2235816	GSE84437	WM_Cluster B	Gene_Cluster A	-3.70816	WM_Score low	NA	NA	Stage IV
GSM2235817	GSE84437	WM_Cluster A	Gene_Cluster A	-12.1015	WM_Score low	NA	NA	Stage IV
GSM2235818	GSE84437	WM_Cluster B	Gene_Cluster D	-19.5075	WM_Score low	NA	NA	Stage IV
GSM2235819	GSE84437	WM_Cluster D	Gene_Cluster D	-10.0266	WM_Score low	NA	NA	Stage IV
GSM2235820	GSE84437	WM_Cluster B	Gene_Cluster C	19.9024	WM_Score high	NA	NA	Stage IV
GSM2235821	GSE84437	WM_Cluster D	Gene_Cluster D	-14.0843	WM_Score low	NA	NA	Stage IV
GSM2235822	GSE84437	WM_Cluster D	Gene_Cluster D	-20.9462	WM_Score low	NA	NA	Stage III
GSM2235823	GSE84437	WM_Cluster A	Gene_Cluster C	33.1392	WM_Score high	NA	NA	Stage IV
GSM2235824	GSE84437	WM_Cluster A	Gene_Cluster B	45.9382	WM_Score high	NA	NA	Stage IV
GSM2235825	GSE84437	WM_Cluster B	Gene_Cluster C	19.1857	WM_Score high	NA	NA	Stage IV
GSM2235826	GSE84437	WM_Cluster B	Gene_Cluster D	-16.2367	WM_Score low	NA	NA	Stage III
GSM2235827	GSE84437	WM_Cluster B	Gene_Cluster B	47.444	WM_Score high	NA	NA	Stage IV
GSM2235828	GSE84437	WM_Cluster D	Gene_Cluster D	-8.59575	WM_Score low	NA	NA	Stage IV
GSM2235829	GSE84437	WM_Cluster D	Gene_Cluster D	-26.8094	WM_Score low	NA	NA	Stage IV
GSM2235830	GSE84437	WM_Cluster D	Gene_Cluster D	-9.68584	WM_Score low	NA	NA	Stage IV
GSM2235831	GSE84437	WM_Cluster D	Gene_Cluster D	-13.1748	WM_Score low	NA	NA	Stage IV
GSM2235837	GSE84437	WM_Cluster D	Gene_Cluster D	-5.18673	WM_Score low	NA	NA	Stage II
GSM2235838	GSE84437	WM_Cluster B	Gene_Cluster C	25.3621	WM_Score high	NA	NA	Stage IV
GSM2235839	GSE84437	WM_Cluster D	Gene_Cluster D	2.30499	WM_Score high	NA	NA	Stage III
GSM2235840	GSE84437	WM_Cluster B	Gene_Cluster D	-21.0365	WM_Score low	NA	NA	Stage II
GSM2235841	GSE84437	WM_Cluster B	Gene_Cluster D	-5.96794	WM_Score low	NA	NA	Stage IV
GSM2235842	GSE84437	WM_Cluster A	Gene_Cluster D	-9.30344	WM_Score low	NA	NA	Stage IV
GSM2235843	GSE84437	WM_Cluster D	Gene_Cluster D	-6.51511	WM_Score low	NA	NA	Stage II
GSM2235844	GSE84437	WM_Cluster D	Gene_Cluster D	-31.009	WM_Score low	NA	NA	Stage IV
GSM2235845	GSE84437	WM_Cluster D	Gene_Cluster D	-13.5983	WM_Score low	NA	NA	Stage IV
GSM2235846	GSE84437	WM_Cluster A	Gene_Cluster D	-7.01522	WM_Score low	NA	NA	Stage IV
GSM2235847	GSE84437	WM_Cluster D	Gene_Cluster D	-5.86077	WM_Score low	NA	NA	Stage IV
GSM2235848	GSE84437	WM_Cluster A	Gene_Cluster B	44.3214	WM_Score high	NA	NA	Stage IV
GSM2235849	GSE84437	WM_Cluster A	Gene_Cluster A	3.83273	WM_Score high	NA	NA	Stage IV
GSM2235850	GSE84437	WM_Cluster B	Gene_Cluster C	11.6071	WM_Score high	NA	NA	Stage II
GSM2235851	GSE84437	WM_Cluster D	Gene_Cluster D	-20.7461	WM_Score low	NA	NA	Stage I
GSM2235852	GSE84437	WM_Cluster A	Gene_Cluster C	23.5898	WM_Score high	NA	NA	Stage IV
GSM2235853	GSE84437	WM_Cluster C	Gene_Cluster A	-11.1713	WM_Score low	NA	NA	Stage II
GSM2235854	GSE84437	WM_Cluster A	Gene_Cluster A	-5.48654	WM_Score low	NA	NA	Stage IV
GSM2235855	GSE84437	WM_Cluster A	Gene_Cluster A	-0.89869	WM_Score low	NA	NA	Stage II
GSM2235862	GSE84437	WM_Cluster A	Gene_Cluster D	-18.0017	WM_Score low	NA	NA	Stage IV
GSM2235863	GSE84437	WM_Cluster A	Gene_Cluster C	22.2574	WM_Score high	NA	NA	Stage IV
GSM2235864	GSE84437	WM_Cluster B	Gene_Cluster A	0.268751	WM_Score high	NA	NA	Stage IV
GSM2235865	GSE84437	WM_Cluster A	Gene_Cluster D	-18.4444	WM_Score low	NA	NA	Stage IV
GSM2235866	GSE84437	WM_Cluster A	Gene_Cluster A	1.29714	WM_Score high	NA	NA	Stage IV
GSM2235867	GSE84437	WM_Cluster A	Gene_Cluster A	-2.28185	WM_Score low	NA	NA	Stage IV
GSM2235878	GSE84437	WM_Cluster B	Gene_Cluster D	-15.235	WM_Score low	NA	NA	Stage IV
GSM2235879	GSE84437	WM_Cluster A	Gene_Cluster A	7.29068	WM_Score high	NA	NA	Stage III
GSM2235880	GSE84437	WM_Cluster A	Gene_Cluster A	-0.824357	WM_Score low	NA	NA	Stage IV
GSM2235881	GSE84437	WM_Cluster B	Gene_Cluster A	-9.89194	WM_Score low	NA	NA	Stage IV
GSM2235882	GSE84437	WM_Cluster A	Gene_Cluster A	-0.107858	WM_Score high	NA	NA	Stage IV
GSM2235883	GSE84437	WM_Cluster A	Gene_Cluster C	9.43163	WM_Score high	NA	NA	Stage IV
GSM2235884	GSE84437	WM_Cluster B	Gene_Cluster C	23.1313	WM_Score high	NA	NA	Stage IV
GSM2235885	GSE84437	WM_Cluster B	Gene_Cluster A	-0.621668	WM_Score low	NA	NA	Stage IV
GSM2235886	GSE84437	WM_Cluster A	Gene_Cluster D	-6.63841	WM_Score low	NA	NA	Stage II
GSM2235887	GSE84437	WM_Cluster B	Gene_Cluster D	-6.42061	WM_Score low	NA	NA	Stage III
GSM2235888	GSE84437	WM_Cluster B	Gene_Cluster A	0.18099	WM_Score high	NA	NA	Stage IV
GSM2235889	GSE84437	WM_Cluster C	Gene_Cluster A	-6.9911	WM_Score low	NA	NA	Stage IV
GSM2235899	GSE84437	WM_Cluster B	Gene_Cluster A	-3.01504	WM_Score low	NA	NA	Stage IV
GSM2235900	GSE84437	WM_Cluster B	Gene_Cluster A	-8.70672	WM_Score low	NA	NA	Stage IV
GSM2235901	GSE84437	WM_Cluster B	Gene_Cluster A	-3.30221	WM_Score low	NA	NA	Stage III
GSM2235902	GSE84437	WM_Cluster A	Gene_Cluster B	52.1273	WM_Score high	NA	NA	Stage IV
GSM2235903	GSE84437	WM_Cluster A	Gene_Cluster A	-3.46215	WM_Score low	NA	NA	Stage IV
GSM2235904	GSE84437	WM_Cluster A	Gene_Cluster C	9.33706	WM_Score high	NA	NA	Stage IV
GSM2235905	GSE84437	WM_Cluster B	Gene_Cluster C	23.4425	WM_Score high	NA	NA	Stage IV
GSM2235906	GSE84437	WM_Cluster A	Gene_Cluster D	-20.3978	WM_Score low	NA	NA	Stage IV
GSM2235907	GSE84437	WM_Cluster A	Gene_Cluster D	-21.0169	WM_Score low	NA	NA	Stage IV
GSM2235908	GSE84437	WM_Cluster A	Gene_Cluster C	13.1709	WM_Score high	NA	NA	Stage III
GSM2235909	GSE84437	WM_Cluster D	Gene_Cluster D	-13.7906	WM_Score low	NA	NA	Stage IV
GSM2235910	GSE84437	WM_Cluster A	Gene_Cluster A	-3.51335	WM_Score low	NA	NA	Stage IV
GSM2235921	GSE84437	WM_Cluster C	Gene_Cluster D	-16.2464	WM_Score low	NA	NA	Stage II
GSM2235922	GSE84437	WM_Cluster C	Gene_Cluster A	-9.88043	WM_Score low	NA	NA	Stage IV
GSM2235923	GSE84437	WM_Cluster C	Gene_Cluster A	-1.8948	WM_Score low	NA	NA	Stage IV
GSM2235924	GSE84437	WM_Cluster A	Gene_Cluster A	3.9169	WM_Score high	NA	NA	Stage IV
GSM2235925	GSE84437	WM_Cluster A	Gene_Cluster A	-3.25438	WM_Score low	NA	NA	Stage IV
GSM2235926	GSE84437	WM_Cluster B	Gene_Cluster A	-1.10921	WM_Score low	NA	NA	Stage IV
GSM2235927	GSE84437	WM_Cluster B	Gene_Cluster D	-17.9586	WM_Score low	NA	NA	Stage IV
GSM2235928	GSE84437	WM_Cluster A	Gene_Cluster D	-10.8154	WM_Score low	NA	NA	Stage IV
GSM2235929	GSE84437	WM_Cluster B	Gene_Cluster B	53.8303	WM_Score high	NA	NA	Stage IV
GSM2235930	GSE84437	WM_Cluster C	Gene_Cluster C	19.6963	WM_Score high	NA	NA	Stage IV
GSM2235931	GSE84437	WM_Cluster A	Gene_Cluster A	-14.5726	WM_Score low	NA	NA	Stage IV
GSM2235932	GSE84437	WM_Cluster C	Gene_Cluster A	-21.2525	WM_Score low	NA	NA	Stage IV
GSM2235933	GSE84437	WM_Cluster B	Gene_Cluster C	39.5932	WM_Score high	NA	NA	Stage IV
GSM2235934	GSE84437	WM_Cluster D	Gene_Cluster A	-4.73499	WM_Score low	NA	NA	Stage IV
GSM2235935	GSE84437	WM_Cluster B	Gene_Cluster A	0.726922	WM_Score high	NA	NA	Stage IV
GSM2235936	GSE84437	WM_Cluster A	Gene_Cluster A	-9.0392	WM_Score low	NA	NA	Stage I
GSM2235937	GSE84437	WM_Cluster B	Gene_Cluster D	-21.7347	WM_Score low	NA	NA	Stage IV
GSM2235938	GSE84437	WM_Cluster D	Gene_Cluster D	-36.1077	WM_Score low	NA	NA	Stage I
GSM2235939	GSE84437	WM_Cluster A	Gene_Cluster C	24.8615	WM_Score high	NA	NA	Stage II
GSM2235940	GSE84437	WM_Cluster B	Gene_Cluster A	2.51418	WM_Score high	NA	NA	Stage IV
GSM2235941	GSE84437	WM_Cluster D	Gene_Cluster D	-23.8545	WM_Score low	NA	NA	Stage II
GSM2235942	GSE84437	WM_Cluster B	Gene_Cluster D	-20.2053	WM_Score low	NA	NA	Stage I
GSM2235943	GSE84437	WM_Cluster A	Gene_Cluster D	-13.5371	WM_Score low	NA	NA	Stage IV
GSM2235944	GSE84437	WM_Cluster B	Gene_Cluster B	50.5651	WM_Score high	NA	NA	Stage III
GSM2235945	GSE84437	WM_Cluster B	Gene_Cluster A	2.41552	WM_Score high	NA	NA	Stage IV
GSM2235946	GSE84437	WM_Cluster B	Gene_Cluster A	-13.9663	WM_Score low	NA	NA	Stage IV
GSM2235947	GSE84437	WM_Cluster B	Gene_Cluster D	-25.1404	WM_Score low	NA	NA	Stage IV
GSM2235948	GSE84437	WM_Cluster B	Gene_Cluster B	60.5073	WM_Score high	NA	NA	Stage IV
GSM2235949	GSE84437	WM_Cluster B	Gene_Cluster A	-6.3899	WM_Score low	NA	NA	Stage IV
GSM2235950	GSE84437	WM_Cluster B	Gene_Cluster B	80.3774	WM_Score high	NA	NA	Stage IV
GSM2235951	GSE84437	WM_Cluster B	Gene_Cluster B	61.8279	WM_Score high	NA	NA	Stage IV
GSM2235952	GSE84437	WM_Cluster B	Gene_Cluster A	-12.4879	WM_Score low	NA	NA	Stage IV
GSM2235953	GSE84437	WM_Cluster B	Gene_Cluster C	10.6983	WM_Score high	NA	NA	Stage IV
GSM2235954	GSE84437	WM_Cluster B	Gene_Cluster A	-9.58821	WM_Score low	NA	NA	Stage III
GSM2235955	GSE84437	WM_Cluster A	Gene_Cluster A	1.21108	WM_Score high	NA	NA	Stage IV
GSM2235956	GSE84437	WM_Cluster C	Gene_Cluster A	-12.1074	WM_Score low	NA	NA	Stage IV
GSM2235957	GSE84437	WM_Cluster C	Gene_Cluster D	-17.7489	WM_Score low	NA	NA	Stage III
GSM2235958	GSE84437	WM_Cluster B	Gene_Cluster B	42.1308	WM_Score high	NA	NA	Stage IV
GSM2235959	GSE84437	WM_Cluster D	Gene_Cluster D	-22.9692	WM_Score low	NA	NA	Stage III
GSM2235960	GSE84437	WM_Cluster A	Gene_Cluster D	-31.4576	WM_Score low	NA	NA	Stage IV
GSM2235961	GSE84437	WM_Cluster B	Gene_Cluster C	27.9551	WM_Score high	NA	NA	Stage IV
GSM2235962	GSE84437	WM_Cluster B	Gene_Cluster A	4.40886	WM_Score high	NA	NA	Stage IV
GSM2235963	GSE84437	WM_Cluster A	Gene_Cluster D	-23.1696	WM_Score low	NA	NA	Stage IV
GSM2235964	GSE84437	WM_Cluster A	Gene_Cluster A	-5.8704	WM_Score low	NA	NA	Stage IV
GSM2235965	GSE84437	WM_Cluster C	Gene_Cluster C	8.91058	WM_Score high	NA	NA	Stage III
GSM2235966	GSE84437	WM_Cluster A	Gene_Cluster C	19.8887	WM_Score high	NA	NA	Stage IV
GSM2235967	GSE84437	WM_Cluster C	Gene_Cluster D	-9.0059	WM_Score low	NA	NA	Stage IV
GSM2235968	GSE84437	WM_Cluster A	Gene_Cluster B	56.7711	WM_Score high	NA	NA	Stage II
GSM2235969	GSE84437	WM_Cluster C	Gene_Cluster A	-15.5167	WM_Score low	NA	NA	Stage II
GSM2235970	GSE84437	WM_Cluster B	Gene_Cluster C	22.876	WM_Score high	NA	NA	Stage IV
GSM2235971	GSE84437	WM_Cluster C	Gene_Cluster C	18.6525	WM_Score high	NA	NA	Stage III
GSM2235972	GSE84437	WM_Cluster C	Gene_Cluster A	-18.6136	WM_Score low	NA	NA	Stage IV
GSM2235973	GSE84437	WM_Cluster C	Gene_Cluster C	-0.58951	WM_Score low	NA	NA	Stage III
GSM2235974	GSE84437	WM_Cluster C	Gene_Cluster A	-16.9729	WM_Score low	NA	NA	Stage IV
GSM2235975	GSE84437	WM_Cluster C	Gene_Cluster A	-17.1552	WM_Score low	NA	NA	Stage III
GSM2235976	GSE84437	WM_Cluster C	Gene_Cluster A	-16.9296	WM_Score low	NA	NA	Stage III
GSM2235977	GSE84437	WM_Cluster C	Gene_Cluster C	22.4119	WM_Score high	NA	NA	Stage IV
GSM2235978	GSE84437	WM_Cluster B	Gene_Cluster A	-8.04723	WM_Score low	NA	NA	Stage IV
GSM2235979	GSE84437	WM_Cluster A	Gene_Cluster A	-4.38495	WM_Score low	NA	NA	Stage II
GSM2235980	GSE84437	WM_Cluster C	Gene_Cluster A	-1.41915	WM_Score low	NA	NA	Stage IV
GSM2235981	GSE84437	WM_Cluster A	Gene_Cluster A	-14.0832	WM_Score low	NA	NA	Stage IV
GSM2235982	GSE84437	WM_Cluster C	Gene_Cluster A	-0.0444974	WM_Score high	NA	NA	Stage III
GSM2235983	GSE84437	WM_Cluster A	Gene_Cluster A	-0.17909	WM_Score high	NA	NA	Stage III
GSM2235984	GSE84437	WM_Cluster A	Gene_Cluster A	-14.8907	WM_Score low	NA	NA	Stage IV
GSM2235985	GSE84437	WM_Cluster C	Gene_Cluster C	5.45344	WM_Score high	NA	NA	Stage IV
GSM2235986	GSE84437	WM_Cluster B	Gene_Cluster A	-14.4105	WM_Score low	NA	NA	Stage III
GSM2235987	GSE84437	WM_Cluster C	Gene_Cluster A	-3.94797	WM_Score low	NA	NA	Stage IV
GSM2235988	GSE84437	WM_Cluster A	Gene_Cluster A	-6.24258	WM_Score low	NA	NA	Stage I
GSM2235991	GSE84437	WM_Cluster B	Gene_Cluster A	7.11993	WM_Score high	NA	NA	Stage III
GSM2235992	GSE84437	WM_Cluster C	Gene_Cluster C	7.10979	WM_Score high	NA	NA	Stage IV
GSM2235993	GSE84437	WM_Cluster B	Gene_Cluster A	5.29652	WM_Score high	NA	NA	Stage III
GSM2235994	GSE84437	WM_Cluster C	Gene_Cluster B	84.0656	WM_Score high	NA	NA	Stage III
GSM2235995	GSE84437	WM_Cluster C	Gene_Cluster D	-24.75	WM_Score low	NA	NA	Stage III
GSM2235996	GSE84437	WM_Cluster B	Gene_Cluster C	13.9016	WM_Score high	NA	NA	Stage IV
GSM2235997	GSE84437	WM_Cluster C	Gene_Cluster A	-3.29616	WM_Score low	NA	NA	Stage IV
GSM2235998	GSE84437	WM_Cluster C	Gene_Cluster A	-6.88968	WM_Score low	NA	NA	Stage IV
GSM2235999	GSE84437	WM_Cluster A	Gene_Cluster A	-15.8222	WM_Score low	NA	NA	Stage IV
GSM2236000	GSE84437	WM_Cluster C	Gene_Cluster C	4.19482	WM_Score high	NA	NA	Stage III
GSM2236001	GSE84437	WM_Cluster A	Gene_Cluster C	15.0125	WM_Score high	NA	NA	Stage IV
GSM2236002	GSE84437	WM_Cluster A	Gene_Cluster D	-23.9154	WM_Score low	NA	NA	Stage IV
GSM2236003	GSE84437	WM_Cluster B	Gene_Cluster B	47.9075	WM_Score high	NA	NA	Stage IV
GSM2236004	GSE84437	WM_Cluster C	Gene_Cluster A	-9.51958	WM_Score low	NA	NA	Stage IV
GSM2236005	GSE84437	WM_Cluster A	Gene_Cluster A	-3.78123	WM_Score low	NA	NA	Stage IV
GSM2236006	GSE84437	WM_Cluster C	Gene_Cluster A	-3.12464	WM_Score low	NA	NA	Stage IV
GSM2236007	GSE84437	WM_Cluster A	Gene_Cluster A	-1.57026	WM_Score low	NA	NA	Stage IV
GSM2236008	GSE84437	WM_Cluster B	Gene_Cluster B	50.5421	WM_Score high	NA	NA	Stage III
GSM2236009	GSE84437	WM_Cluster C	Gene_Cluster C	11.1281	WM_Score high	NA	NA	Stage IV
GSM2236010	GSE84437	WM_Cluster C	Gene_Cluster A	-9.54244	WM_Score low	NA	NA	Stage IV
GSM2236011	GSE84437	WM_Cluster A	Gene_Cluster A	8.37125	WM_Score high	NA	NA	Stage III
GSM2236012	GSE84437	WM_Cluster D	Gene_Cluster D	-17.6064	WM_Score low	NA	NA	Stage IV
GSM2236013	GSE84437	WM_Cluster D	Gene_Cluster D	-14.9919	WM_Score low	NA	NA	Stage II
GSM2236014	GSE84437	WM_Cluster A	Gene_Cluster D	-27.4492	WM_Score low	NA	NA	Stage III
GSM2236015	GSE84437	WM_Cluster B	Gene_Cluster B	38.9166	WM_Score high	NA	NA	Stage IV
GSM2236016	GSE84437	WM_Cluster A	Gene_Cluster D	-16.5314	WM_Score low	NA	NA	Stage IV
GSM2236017	GSE84437	WM_Cluster B	Gene_Cluster C	15.4034	WM_Score high	NA	NA	Stage IV
GSM2236018	GSE84437	WM_Cluster B	Gene_Cluster A	-5.25505	WM_Score low	NA	NA	Stage IV
GSM2236019	GSE84437	WM_Cluster D	Gene_Cluster D	-20.7662	WM_Score low	NA	NA	Stage III
GSM2236020	GSE84437	WM_Cluster A	Gene_Cluster D	-27.9885	WM_Score low	NA	NA	Stage IV
GSM2236021	GSE84437	WM_Cluster B	Gene_Cluster B	43.8943	WM_Score high	NA	NA	Stage IV
GSM2236022	GSE84437	WM_Cluster A	Gene_Cluster D	-9.999	WM_Score low	NA	NA	Stage IV
GSM2236023	GSE84437	WM_Cluster D	Gene_Cluster D	-29.4797	WM_Score low	NA	NA	Stage II
GSM2236024	GSE84437	WM_Cluster B	Gene_Cluster A	0.919908	WM_Score high	NA	NA	Stage III
GSM2236025	GSE84437	WM_Cluster B	Gene_Cluster C	32.1338	WM_Score high	NA	NA	Stage III
GSM2236026	GSE84437	WM_Cluster B	Gene_Cluster B	58.0707	WM_Score high	NA	NA	Stage III
GSM2236027	GSE84437	WM_Cluster B	Gene_Cluster C	20.5475	WM_Score high	NA	NA	Stage IV
GSM2236028	GSE84437	WM_Cluster D	Gene_Cluster D	-24.9698	WM_Score low	NA	NA	Stage III
GSM2236029	GSE84437	WM_Cluster D	Gene_Cluster D	-20.7978	WM_Score low	NA	NA	Stage II
GSM2236030	GSE84437	WM_Cluster D	Gene_Cluster D	-19.1472	WM_Score low	NA	NA	Stage IV
GSM2236031	GSE84437	WM_Cluster B	Gene_Cluster C	31.261	WM_Score high	NA	NA	Stage IV
GSM2236032	GSE84437	WM_Cluster A	Gene_Cluster D	-26.3825	WM_Score low	NA	NA	Stage IV
GSM2236033	GSE84437	WM_Cluster B	Gene_Cluster A	-10.1559	WM_Score low	NA	NA	Stage III
GSM2236034	GSE84437	WM_Cluster B	Gene_Cluster A	-3.02218	WM_Score low	NA	NA	Stage IV
GSM2236036	GSE84437	WM_Cluster B	Gene_Cluster D	-20.4053	WM_Score low	NA	NA	Stage I
GSM2236037	GSE84437	WM_Cluster B	Gene_Cluster C	20.0397	WM_Score high	NA	NA	Stage IV
GSM2236038	GSE84437	WM_Cluster A	Gene_Cluster A	2.52933	WM_Score high	NA	NA	Stage IV
GSM2236039	GSE84437	WM_Cluster D	Gene_Cluster D	-13.9158	WM_Score low	NA	NA	Stage II
GSM2236040	GSE84437	WM_Cluster A	Gene_Cluster D	-31.7724	WM_Score low	NA	NA	Stage III
GSM2236041	GSE84437	WM_Cluster B	Gene_Cluster C	13.2221	WM_Score high	NA	NA	Stage IV
GSM2236042	GSE84437	WM_Cluster A	Gene_Cluster A	-10.496	WM_Score low	NA	NA	Stage IV
GSM2236043	GSE84437	WM_Cluster B	Gene_Cluster A	-3.09624	WM_Score low	NA	NA	Stage III
GSM2236044	GSE84437	WM_Cluster D	Gene_Cluster D	-13.1628	WM_Score low	NA	NA	Stage II
GSM2236045	GSE84437	WM_Cluster D	Gene_Cluster D	-25.8395	WM_Score low	NA	NA	Stage IV
GSM2236046	GSE84437	WM_Cluster A	Gene_Cluster D	-16.1563	WM_Score low	NA	NA	Stage IV
GSM2236047	GSE84437	WM_Cluster A	Gene_Cluster C	15.0442	WM_Score high	NA	NA	Stage IV
GSM2236048	GSE84437	WM_Cluster D	Gene_Cluster D	-46.2114	WM_Score low	NA	NA	Stage III
GSM2236049	GSE84437	WM_Cluster D	Gene_Cluster A	9.40693	WM_Score high	NA	NA	Stage IV
GSM2236050	GSE84437	WM_Cluster D	Gene_Cluster D	-10.0857	WM_Score low	NA	NA	Stage III
GSM2236051	GSE84437	WM_Cluster D	Gene_Cluster C	31.4716	WM_Score high	NA	NA	Stage IV
GSM2236052	GSE84437	WM_Cluster D	Gene_Cluster D	-28.6009	WM_Score low	NA	NA	Stage IV
GSM2236053	GSE84437	WM_Cluster B	Gene_Cluster C	32.3612	WM_Score high	NA	NA	Stage IV
GSM2236054	GSE84437	WM_Cluster B	Gene_Cluster C	28.1808	WM_Score high	NA	NA	Stage IV
GSM2236055	GSE84437	WM_Cluster A	Gene_Cluster A	12.6498	WM_Score high	NA	NA	Stage IV
GSM2236056	GSE84437	WM_Cluster A	Gene_Cluster A	-6.04881	WM_Score low	NA	NA	Stage IV
GSM2236057	GSE84437	WM_Cluster A	Gene_Cluster C	14.1982	WM_Score high	NA	NA	Stage II
GSM2236058	GSE84437	WM_Cluster A	Gene_Cluster A	3.20283	WM_Score high	NA	NA	Stage II
GSM2236059	GSE84437	WM_Cluster A	Gene_Cluster C	9.59673	WM_Score high	NA	NA	Stage II
GSM2236060	GSE84437	WM_Cluster A	Gene_Cluster C	21.5801	WM_Score high	NA	NA	Stage IV
GSM2236061	GSE84437	WM_Cluster B	Gene_Cluster A	7.25419	WM_Score high	NA	NA	Stage II
GSM2236062	GSE84437	WM_Cluster D	Gene_Cluster D	-24.079	WM_Score low	NA	NA	Stage III
GSM2236063	GSE84437	WM_Cluster A	Gene_Cluster A	-5.29536	WM_Score low	NA	NA	Stage II
GSM2236064	GSE84437	WM_Cluster D	Gene_Cluster D	-25.9084	WM_Score low	NA	NA	Stage IV
GSM2236065	GSE84437	WM_Cluster B	Gene_Cluster A	11.0459	WM_Score high	NA	NA	Stage IV
GSM2236066	GSE84437	WM_Cluster D	Gene_Cluster A	17.9439	WM_Score high	NA	NA	Stage IV
GSM2236067	GSE84437	WM_Cluster D	Gene_Cluster D	-4.98765	WM_Score low	NA	NA	Stage IV
GSM2236068	GSE84437	WM_Cluster A	Gene_Cluster B	70.0242	WM_Score high	NA	NA	Stage IV
GSM2236069	GSE84437	WM_Cluster D	Gene_Cluster D	-22.0021	WM_Score low	NA	NA	Stage III
GSM2236070	GSE84437	WM_Cluster D	Gene_Cluster D	-15.1526	WM_Score low	NA	NA	Stage III
GSM2236071	GSE84437	WM_Cluster D	Gene_Cluster D	-30.7042	WM_Score low	NA	NA	Stage IV
GSM2236072	GSE84437	WM_Cluster D	Gene_Cluster D	-9.23825	WM_Score low	NA	NA	Stage III
GSM2236073	GSE84437	WM_Cluster B	Gene_Cluster A	-3.13501	WM_Score low	NA	NA	Stage IV
GSM2236074	GSE84437	WM_Cluster D	Gene_Cluster D	-20.2161	WM_Score low	NA	NA	Stage II
GSM2236075	GSE84437	WM_Cluster B	Gene_Cluster C	24.378	WM_Score high	NA	NA	Stage IV
GSM2236076	GSE84437	WM_Cluster A	Gene_Cluster A	-4.89493	WM_Score low	NA	NA	Stage III
GSM2236077	GSE84437	WM_Cluster D	Gene_Cluster D	-24.976	WM_Score low	NA	NA	Stage IV
GSM2236078	GSE84437	WM_Cluster A	Gene_Cluster D	-24.5128	WM_Score low	NA	NA	Stage IV
GSM2236079	GSE84437	WM_Cluster B	Gene_Cluster D	-18.1747	WM_Score low	NA	NA	Stage II
GSM2236080	GSE84437	WM_Cluster C	Gene_Cluster A	-3.78354	WM_Score low	NA	NA	Stage IV
GSM2236082	GSE84437	WM_Cluster A	Gene_Cluster A	-1.92847	WM_Score low	NA	NA	Stage IV
GSM2236083	GSE84437	WM_Cluster A	Gene_Cluster A	11.5577	WM_Score high	NA	NA	Stage IV
GSM2236084	GSE84437	WM_Cluster A	Gene_Cluster D	-16.2818	WM_Score low	NA	NA	Stage III
GSM2236085	GSE84437	WM_Cluster D	Gene_Cluster D	-24.2527	WM_Score low	NA	NA	Stage IV
GSM2236086	GSE84437	WM_Cluster A	Gene_Cluster A	-8.35429	WM_Score low	NA	NA	Stage IV
GSM2236087	GSE84437	WM_Cluster A	Gene_Cluster A	-13.6012	WM_Score low	NA	NA	Stage III
GSM2236088	GSE84437	WM_Cluster A	Gene_Cluster A	-10.869	WM_Score low	NA	NA	Stage IV
GSM2236089	GSE84437	WM_Cluster A	Gene_Cluster D	-16.6796	WM_Score low	NA	NA	Stage IV
GSM2236090	GSE84437	WM_Cluster A	Gene_Cluster A	2.40347	WM_Score high	NA	NA	Stage IV
GSM2236091	GSE84437	WM_Cluster A	Gene_Cluster A	-8.71709	WM_Score low	NA	NA	Stage III
GSM2236092	GSE84437	WM_Cluster A	Gene_Cluster D	-11.467	WM_Score low	NA	NA	Stage IV
GSM2236093	GSE84437	WM_Cluster D	Gene_Cluster D	-14.6647	WM_Score low	NA	NA	Stage III
GSM2236094	GSE84437	WM_Cluster A	Gene_Cluster D	-13.3111	WM_Score low	NA	NA	Stage IV
GSM2236095	GSE84437	WM_Cluster A	Gene_Cluster A	-1.83019	WM_Score low	NA	NA	Stage IV
