# Supplementary material for: Cross-talk of RNA modification "writers" describes tumor stemness and microenvironment and guides personalized immunotherapy for gastric cancer
Source: Aging (Albany NY). 2023 Jun 14;15(12):5445–81. doi: 10.18632/aging.204802 (PMC10333070; doi:10.18632/aging.204802)
Supplement: Supplementary Table 5 [file aging-15-204802-s006.xlsx]

## Sheet: Sheet1
Supplementary Table 5. The grouping information of patients in TCGA-STAD cohort.
Patient ID	Dataset	WM_Score	WM_Score_Group	Molecular subtypes	MSI status	EBV infection
TCGA-D7-A74A	TCGA	7.03608	WM_Score high	CIN	MSS	Negative
TCGA-BR-7704	TCGA	7.24189	WM_Score high	NA	MSS	NA
TCGA-VQ-A91N	TCGA	-23.781	WM_Score low	CIN	MSS	Negative
TCGA-CD-A4MH	TCGA	-1.59528	WM_Score high	CIN	MSS	Negative
TCGA-EQ-8122	TCGA	0.251821	WM_Score high	CIN	MSS	Negative
TCGA-VQ-A91Y	TCGA	10.7917	WM_Score high	CIN	MSS	Negative
TCGA-CG-4438	TCGA	-36.766	WM_Score low	CIN	MSS	Negative
TCGA-BR-4366	TCGA	-34.6172	WM_Score low	CIN	MSS	Negative
TCGA-VQ-AA64	TCGA	-7.05519	WM_Score low	CIN	MSS	Negative
TCGA-HF-7132	TCGA	-6.26825	WM_Score low	MSI	MSI-H	Negative
TCGA-CG-5717	TCGA	23.0671	WM_Score high	GS	MSS	Negative
TCGA-BR-A4J8	TCGA	25.6159	WM_Score high	CIN	MSS	Negative
TCGA-CG-5732	TCGA	19.7899	WM_Score high	CIN	MSS	Negative
TCGA-CG-4477	TCGA	-36.0275	WM_Score low	CIN	MSS	Negative
TCGA-HU-A4G3	TCGA	23.9423	WM_Score high	GS	MSS	Negative
TCGA-IN-AB1X	TCGA	-13.895	WM_Score low	CIN	MSI-L	Negative
TCGA-CD-5804	TCGA	39.714	WM_Score high	CIN	MSS	Negative
TCGA-CG-5721	TCGA	7.66878	WM_Score high	MSI	MSI-H	Negative
TCGA-CD-A489	TCGA	21.8401	WM_Score high	CIN	MSS	Negative
TCGA-RD-A8N4	TCGA	36.0159	WM_Score high	GS	MSS	Negative
TCGA-BR-6566	TCGA	31.6115	WM_Score high	MSI	MSI-H	Negative
TCGA-HU-8244	TCGA	10.38	WM_Score high	NA	MSI-L	NA
TCGA-FP-A9TM	TCGA	-12.5637	WM_Score low	CIN	MSS	Negative
TCGA-MX-A5UG	TCGA	12.5276	WM_Score high	GS	MSS	Negative
TCGA-VQ-A94U	TCGA	-4.9699	WM_Score low	CIN	MSS	Negative
TCGA-D7-A4Z0	TCGA	22.1645	WM_Score high	GS	MSS	Negative
TCGA-BR-8590	TCGA	-0.0180532	WM_Score high	CIN	MSS	Negative
TCGA-HU-8610	TCGA	2.98098	WM_Score high	GS	MSS	Negative
TCGA-VQ-AA69	TCGA	-73.7325	WM_Score low	EBV	MSS	Positive
TCGA-CG-5723	TCGA	8.16949	WM_Score high	MSI	MSI-H	Negative
TCGA-RD-A8N2	TCGA	39.3354	WM_Score high	GS	MSS	Negative
TCGA-BR-7722	TCGA	33.9942	WM_Score high	CIN	MSS	Negative
TCGA-D7-8576	TCGA	-4.22018	WM_Score high	CIN	MSS	Negative
TCGA-BR-8058	TCGA	7.118	WM_Score high	CIN	MSI-L	Negative
TCGA-VQ-A91E	TCGA	-13.4421	WM_Score low	NA	MSI-H	NA
TCGA-VQ-A8PO	TCGA	-14.3444	WM_Score low	MSI	MSI-H	Negative
TCGA-HU-8249	TCGA	-14.4426	WM_Score low	CIN	MSS	Negative
TCGA-CG-5725	TCGA	-4.52077	WM_Score high	NA	MSS	NA
TCGA-HU-A4H4	TCGA	-15.286	WM_Score low	MSI	MSI-H	Negative
TCGA-VQ-A8PJ	TCGA	-2.66456	WM_Score high	CIN	MSS	Negative
TCGA-BR-6565	TCGA	-8.52211	WM_Score low	CIN	MSS	Negative
TCGA-VQ-A923	TCGA	-13.7295	WM_Score low	EBV	MSS	Positive
TCGA-D7-A4YU	TCGA	-37.6097	WM_Score low	CIN	MSS	Negative
TCGA-VQ-AA6K	TCGA	4.27091	WM_Score high	CIN	MSS	Negative
TCGA-BR-8679	TCGA	-26.9062	WM_Score low	CIN	MSI-L	Negative
TCGA-F1-A448	TCGA	12.6252	WM_Score high	MSI	MSI-H	Negative
TCGA-CD-8535	TCGA	-41.6716	WM_Score low	CIN	MSS	Negative
TCGA-BR-6852	TCGA	4.82116	WM_Score high	MSI	MSI-H	Negative
TCGA-BR-6458	TCGA	-2.59851	WM_Score high	CIN	MSI-L	Negative
TCGA-ZA-A8F6	TCGA	24.1893	WM_Score high	CIN	MSS	Negative
TCGA-BR-7196	TCGA	11.6297	WM_Score high	EBV	MSS	Positive
TCGA-IN-A6RI	TCGA	-9.85229	WM_Score low	CIN	MSS	Negative
TCGA-HJ-7597	TCGA	-2.48397	WM_Score high	NA	MSI-H	NA
TCGA-HU-A4GQ	TCGA	-1.64555	WM_Score high	MSI	MSI-H	Negative
TCGA-B7-5818	TCGA	19.1476	WM_Score high	EBV	MSI-L	Positive
TCGA-BR-8588	TCGA	7.3761	WM_Score high	CIN	MSS	Negative
TCGA-VQ-A8DU	TCGA	-6.74751	WM_Score low	CIN	MSS	Negative
TCGA-HU-A4G9	TCGA	-8.03811	WM_Score low	MSI	MSI-H	Negative
TCGA-CD-A4MG	TCGA	10.0279	WM_Score high	MSI	MSI-H	Negative
TCGA-HU-8602	TCGA	-53.8235	WM_Score low	MSI	MSI-H	Negative
TCGA-VQ-A91S	TCGA	-29.1794	WM_Score low	CIN	MSS	Negative
TCGA-HU-A4GY	TCGA	5.83633	WM_Score high	CIN	MSS	Negative
TCGA-BR-8365	TCGA	28.982	WM_Score high	CIN	MSS	Negative
TCGA-D7-5578	TCGA	12.8129	WM_Score high	CIN	MSI-L	Negative
TCGA-BR-8682	TCGA	10.8237	WM_Score high	CIN	MSS	Negative
TCGA-D7-8570	TCGA	10.1838	WM_Score high	EBV	MSS	Positive
TCGA-BR-6453	TCGA	34.8487	WM_Score high	GS	MSS	Negative
TCGA-HU-A4GP	TCGA	2.43228	WM_Score high	CIN	MSI-L	Negative
TCGA-HU-A4H8	TCGA	-14.1058	WM_Score low	MSI	MSI-H	Negative
TCGA-VQ-A8E3	TCGA	-33.6328	WM_Score low	MSI	MSI-H	Negative
TCGA-KB-A93H	TCGA	-11.169	WM_Score low	NA	MSS	NA
TCGA-CG-4476	TCGA	-9.58402	WM_Score low	CIN	MSS	Negative
TCGA-BR-8297	TCGA	23.5662	WM_Score high	CIN	MSS	Negative
TCGA-HU-A4GF	TCGA	-18.0258	WM_Score low	CIN	MSS	Negative
TCGA-HU-A4GT	TCGA	-20.5689	WM_Score low	MSI	MSI-H	Negative
TCGA-VQ-A91A	TCGA	6.23255	WM_Score high	CIN	MSS	Negative
TCGA-VQ-A8PX	TCGA	-7.52272	WM_Score low	MSI	MSI-H	Negative
TCGA-IN-A7NR	TCGA	22.1869	WM_Score high	CIN	MSS	Negative
TCGA-HU-A4G8	TCGA	-33.6717	WM_Score low	MSI	MSI-H	Negative
TCGA-CG-5724	TCGA	19.6417	WM_Score high	CIN	MSI-L	Negative
TCGA-BR-4201	TCGA	-18.7592	WM_Score low	MSI	MSI-H	Negative
TCGA-VQ-A91K	TCGA	9.04358	WM_Score high	MSI	MSI-H	Negative
TCGA-IN-A6RL	TCGA	11.4292	WM_Score high	MSI	MSS	Negative
TCGA-MX-A5UJ	TCGA	10.3402	WM_Score high	MSI	MSI-H	Negative
TCGA-BR-8286	TCGA	-13.1545	WM_Score low	CIN	MSI-L	Negative
TCGA-R5-A7ZF	TCGA	-26.9195	WM_Score low	CIN	MSS	Negative
TCGA-D7-6815	TCGA	-3.90126	WM_Score high	CIN	MSS	Negative
TCGA-CD-8525	TCGA	10.6065	WM_Score high	NA	MSS	NA
TCGA-CG-5719	TCGA	39.6009	WM_Score high	CIN	MSS	Negative
TCGA-RD-A8NB	TCGA	-11.0357	WM_Score low	MSI	MSI-H	Negative
TCGA-BR-A4IV	TCGA	36.0344	WM_Score high	GS	MSS	Negative
TCGA-HF-A5NB	TCGA	-9.52247	WM_Score low	MSI	MSI-H	Negative
TCGA-FP-8099	TCGA	-6.41341	WM_Score low	CIN	MSS	Negative
TCGA-VQ-A94T	TCGA	-14.9248	WM_Score low	CIN	MSI-L	Negative
TCGA-CD-8533	TCGA	-45.6024	WM_Score low	NA	MSI-L	NA
TCGA-CD-8530	TCGA	18.76	WM_Score high	CIN	MSS	Negative
TCGA-VQ-AA68	TCGA	-2.83943	WM_Score high	CIN	MSS	Negative
TCGA-BR-8677	TCGA	3.26655	WM_Score high	CIN	MSS	Negative
TCGA-HU-A4HB	TCGA	4.16593	WM_Score high	NA	MSS	NA
TCGA-BR-7707	TCGA	0.85271	WM_Score high	MSI	MSI-H	Negative
TCGA-VQ-A8P8	TCGA	5.81306	WM_Score high	GS	MSS	Negative
TCGA-BR-8384	TCGA	27.2368	WM_Score high	GS	MSS	Negative
TCGA-RD-A8N1	TCGA	1.30748	WM_Score high	CIN	MSS	Negative
TCGA-VQ-A8DT	TCGA	6.09702	WM_Score high	GS	MSS	Negative
TCGA-BR-8487	TCGA	5.17304	WM_Score high	MSI	MSI-H	Negative
TCGA-CD-8526	TCGA	-34.0188	WM_Score low	CIN	MSS	Negative
TCGA-HU-A4H6	TCGA	11.0623	WM_Score high	CIN	MSS	Negative
TCGA-BR-7957	TCGA	5.30046	WM_Score high	CIN	MSS	Negative
TCGA-BR-6452	TCGA	-14.5749	WM_Score low	MSI	MSI-H	Negative
TCGA-BR-8592	TCGA	26.0921	WM_Score high	GS	MSS	Negative
TCGA-D7-8573	TCGA	-24.3494	WM_Score low	EBV	MSI-L	Positive
TCGA-D7-A6F0	TCGA	-30.4135	WM_Score low	CIN	MSS	Negative
TCGA-FP-A8CX	TCGA	17.5361	WM_Score high	CIN	MSS	Negative
TCGA-ZQ-A9CR	TCGA	10.8559	WM_Score high	CIN	MSI-L	Negative
TCGA-HU-8238	TCGA	20.1157	WM_Score high	NA	MSS	NA
TCGA-VQ-AA6A	TCGA	-8.1467	WM_Score low	CIN	MSS	Negative
TCGA-BR-8081	TCGA	-1.30839	WM_Score high	MSI	MSI-H	Negative
TCGA-VQ-AA6G	TCGA	7.28258	WM_Score high	CIN	MSS	Negative
TCGA-BR-8686	TCGA	-3.46544	WM_Score high	EBV	MSS	Positive
TCGA-VQ-A94O	TCGA	-32.1719	WM_Score low	CIN	MSS	Negative
TCGA-FP-8211	TCGA	14.9662	WM_Score high	CIN	MSS	Negative
TCGA-BR-7197	TCGA	-2.02215	WM_Score high	CIN	MSS	Negative
TCGA-FP-7735	TCGA	27.7683	WM_Score high	CIN	MSS	Negative
TCGA-D7-A6EY	TCGA	-4.07728	WM_Score high	MSI	MSI-H	Negative
TCGA-BR-8678	TCGA	-63.1533	WM_Score low	CIN	MSS	Negative
TCGA-BR-8680	TCGA	-36.2771	WM_Score low	MSI	MSS	Negative
TCGA-CG-4462	TCGA	14.6458	WM_Score high	GS	MSS	Negative
TCGA-RD-A8N5	TCGA	29.0845	WM_Score high	CIN	MSS	Negative
TCGA-BR-8295	TCGA	-31.654	WM_Score low	NA	MSI-L	NA
TCGA-D7-8578	TCGA	24.3242	WM_Score high	CIN	MSS	Negative
TCGA-R5-A7ZI	TCGA	21.0983	WM_Score high	MSI	MSI-H	Negative
TCGA-FP-8209	TCGA	28.4613	WM_Score high	GS	MSS	Negative
TCGA-D7-8574	TCGA	17.0475	WM_Score high	GS	MSS	Negative
TCGA-D7-5577	TCGA	9.14186	WM_Score high	EBV	MSS	Positive
TCGA-R5-A7O7	TCGA	12.0893	WM_Score high	CIN	MSS	Negative
TCGA-RD-A7BS	TCGA	20.2268	WM_Score high	GS	MSS	Negative
TCGA-BR-A4J5	TCGA	26.0632	WM_Score high	GS	MSS	Negative
TCGA-BR-6709	TCGA	10.0718	WM_Score high	NA	MSS	NA
TCGA-MX-A666	TCGA	-35.3681	WM_Score low	CIN	MSS	Negative
TCGA-BR-A44T	TCGA	26.881	WM_Score high	GS	MSS	Negative
TCGA-CD-5813	TCGA	40.6896	WM_Score high	NA	MSS	NA
TCGA-CG-4444	TCGA	-30.2732	WM_Score low	CIN	MSS	Negative
TCGA-CD-5798	TCGA	49.757	WM_Score high	GS	MSS	Negative
TCGA-BR-7851	TCGA	-20.7332	WM_Score low	MSI	MSI-H	Negative
TCGA-BR-8591	TCGA	-18.516	WM_Score low	MSI	MSI-H	Negative
TCGA-D7-A6EV	TCGA	-26.0883	WM_Score low	CIN	MSI-L	Negative
TCGA-R5-A805	TCGA	12.1952	WM_Score high	CIN	MSI-L	Negative
TCGA-VQ-AA6F	TCGA	5.62549	WM_Score high	CIN	MSS	Negative
TCGA-BR-4256	TCGA	-9.06811	WM_Score low	MSI	MSI-H	Negative
TCGA-BR-A4J6	TCGA	27.1108	WM_Score high	CIN	MSS	Negative
TCGA-CG-4443	TCGA	-11.6155	WM_Score low	CIN	MSS	Negative
TCGA-CG-5718	TCGA	27.3624	WM_Score high	CIN	MSS	Negative
TCGA-BR-6455	TCGA	-19.2389	WM_Score low	EBV	MSS	Positive
TCGA-BR-4363	TCGA	-29.2476	WM_Score low	MSI	MSI-H	Negative
TCGA-VQ-A8P5	TCGA	-15.7314	WM_Score low	CIN	MSI-L	Negative
TCGA-BR-A4PF	TCGA	-31.4559	WM_Score low	CIN	MSS	Negative
TCGA-VQ-A94R	TCGA	-12.4622	WM_Score low	CIN	MSI-L	Negative
TCGA-BR-4369	TCGA	-34.5393	WM_Score low	CIN	MSS	Negative
TCGA-D7-6519	TCGA	17.533	WM_Score high	CIN	MSS	Negative
TCGA-VQ-A91U	TCGA	-22.7464	WM_Score low	CIN	MSS	Negative
TCGA-VQ-A925	TCGA	-0.551624	WM_Score high	CIN	MSS	Negative
TCGA-BR-8372	TCGA	-43.842	WM_Score low	MSI	MSI-H	Negative
TCGA-F1-6875	TCGA	-14.98	WM_Score low	CIN	MSS	Negative
TCGA-FP-7916	TCGA	-4.31917	WM_Score high	EBV	MSS	Positive
TCGA-VQ-AA6D	TCGA	-35.3687	WM_Score low	MSI	MSI-H	Negative
TCGA-BR-8589	TCGA	-27.6286	WM_Score low	EBV	MSS	Positive
TCGA-3M-AB46	TCGA	-10.217	WM_Score low	CIN	MSS	Negative
TCGA-CG-5734	TCGA	43.3659	WM_Score high	CIN	MSI-L	Negative
TCGA-BR-4294	TCGA	18.9778	WM_Score high	CIN	MSI-L	Negative
TCGA-VQ-A924	TCGA	-21.8965	WM_Score low	MSI	MSI-H	Negative
TCGA-BR-8683	TCGA	-13.4802	WM_Score low	CIN	MSI-L	Negative
TCGA-VQ-A8PK	TCGA	-2.8846	WM_Score high	CIN	MSS	Negative
TCGA-BR-A4J4	TCGA	-10.5161	WM_Score low	EBV	MSI-L	Positive
TCGA-R5-A7ZE	TCGA	6.69101	WM_Score high	CIN	MSS	Negative
TCGA-D7-6522	TCGA	43.7439	WM_Score high	GS	MSS	Negative
TCGA-D7-6822	TCGA	-26.0089	WM_Score low	CIN	MSS	Negative
TCGA-BR-6803	TCGA	40.9413	WM_Score high	GS	MSS	Negative
TCGA-BR-8483	TCGA	3.89926	WM_Score high	CIN	MSS	Negative
TCGA-BR-6563	TCGA	38.3844	WM_Score high	GS	MSS	Negative
TCGA-VQ-A8E7	TCGA	1.8225	WM_Score high	CIN	MSS	Negative
TCGA-CG-4436	TCGA	-42.822	WM_Score low	CIN	MSI-L	Negative
TCGA-D7-6520	TCGA	22.2867	WM_Score high	CIN	MSS	Negative
TCGA-BR-4368	TCGA	-22.3478	WM_Score low	MSI	MSI-H	Negative
TCGA-BR-8676	TCGA	-9.30176	WM_Score low	NA	MSS	NA
TCGA-BR-6457	TCGA	48.5774	WM_Score high	GS	MSS	Negative
TCGA-D7-A747	TCGA	31.361	WM_Score high	CIN	MSS	Negative
TCGA-BR-A44U	TCGA	16.8697	WM_Score high	CIN	MSS	Negative
TCGA-KB-A93G	TCGA	21.8549	WM_Score high	NA	MSS	NA
TCGA-BR-8367	TCGA	1.54251	WM_Score high	GS	MSS	Negative
TCGA-D7-A6F2	TCGA	6.88428	WM_Score high	CIN	MSS	Negative
TCGA-D7-6521	TCGA	31.168	WM_Score high	CIN	MSI-L	Negative
TCGA-BR-6454	TCGA	8.43766	WM_Score high	CIN	MSS	Negative
TCGA-CG-4466	TCGA	-39.2101	WM_Score low	CIN	MSI-L	Negative
TCGA-CD-8524	TCGA	13.4622	WM_Score high	CIN	MSI-L	Negative
TCGA-BR-7723	TCGA	-36.054	WM_Score low	CIN	MSI-L	Negative
TCGA-CD-A48C	TCGA	7.9775	WM_Score high	CIN	MSS	Negative
TCGA-HU-A4GX	TCGA	-2.66964	WM_Score high	MSI	MSI-H	Negative
TCGA-BR-8382	TCGA	7.01552	WM_Score high	MSI	MSI-H	Negative
TCGA-IN-AB1V	TCGA	14.9045	WM_Score high	CIN	MSS	Negative
TCGA-CD-8532	TCGA	8.32156	WM_Score high	CIN	MSS	Negative
TCGA-IN-8663	TCGA	-26.373	WM_Score low	CIN	MSI-L	Negative
TCGA-VQ-A91D	TCGA	1.49645	WM_Score high	MSI	MSI-H	Negative
TCGA-KB-A6F7	TCGA	-19.0208	WM_Score low	CIN	MSS	Negative
TCGA-VQ-A8PQ	TCGA	-0.668492	WM_Score high	GS	MSS	Negative
TCGA-B7-A5TN	TCGA	21.395	WM_Score high	CIN	MSS	Negative
TCGA-VQ-A8E0	TCGA	-0.243308	WM_Score high	CIN	MSS	Negative
TCGA-CD-5803	TCGA	24.6285	WM_Score high	CIN	MSS	Negative
TCGA-BR-8371	TCGA	42.8061	WM_Score high	GS	MSS	Negative
TCGA-VQ-A8PU	TCGA	4.71354	WM_Score high	CIN	MSS	Negative
TCGA-HU-A4G2	TCGA	-5.77768	WM_Score low	EBV	MSS	Positive
TCGA-B7-A5TK	TCGA	5.65661	WM_Score high	EBV	MSS	Positive
TCGA-SW-A7EB	TCGA	10.4189	WM_Score high	CIN	MSS	Negative
TCGA-BR-8690	TCGA	14.3443	WM_Score high	NA	MSI-L	NA
TCGA-BR-4357	TCGA	-24.0662	WM_Score low	CIN	MSS	Negative
TCGA-CG-4440	TCGA	-33.1634	WM_Score low	CIN	MSI-L	Negative
TCGA-BR-6802	TCGA	9.37411	WM_Score high	MSI	MSI-H	Negative
TCGA-BR-4370	TCGA	-5.02941	WM_Score low	MSI	MSI-H	Negative
TCGA-VQ-A8E2	TCGA	-23.2551	WM_Score low	CIN	MSS	Negative
TCGA-D7-6818	TCGA	22.9791	WM_Score high	CIN	MSS	Negative
TCGA-RD-A8N9	TCGA	8.28101	WM_Score high	CIN	MSS	Negative
TCGA-D7-6525	TCGA	9.7489	WM_Score high	CIN	MSI-L	Negative
TCGA-HU-A4GU	TCGA	-27.7851	WM_Score low	MSI	MSI-H	Negative
TCGA-BR-8059	TCGA	22.2671	WM_Score high	MSI	MSI-H	Negative
TCGA-F1-6177	TCGA	-9.46265	WM_Score low	MSI	MSI-H	Negative
TCGA-CD-8528	TCGA	-28.8618	WM_Score low	CIN	MSI-L	Negative
TCGA-BR-6710	TCGA	43.4143	WM_Score high	NA	MSS	NA
TCGA-BR-8291	TCGA	21.3711	WM_Score high	CIN	MSS	Negative
TCGA-D7-6526	TCGA	-5.37972	WM_Score low	CIN	MSS	Negative
TCGA-VQ-A91X	TCGA	-7.72228	WM_Score low	CIN	MSI-L	Negative
TCGA-BR-6801	TCGA	29.9468	WM_Score high	CIN	MSI-L	Negative
TCGA-VQ-A91V	TCGA	5.47941	WM_Score high	CIN	MSS	Negative
TCGA-VQ-A8PM	TCGA	5.1153	WM_Score high	CIN	MSS	Negative
TCGA-CD-8529	TCGA	12.211	WM_Score high	MSI	MSS	Negative
TCGA-CG-4460	TCGA	-26.1821	WM_Score low	NA	MSI-H	NA
TCGA-BR-A4J9	TCGA	40.2998	WM_Score high	GS	MSS	Negative
TCGA-B7-A5TJ	TCGA	4.72433	WM_Score high	CIN	MSI-H	Negative
TCGA-IN-A6RS	TCGA	-2.9706	WM_Score high	CIN	MSS	Negative
TCGA-D7-A6EZ	TCGA	-24.9016	WM_Score low	EBV	MSS	Positive
TCGA-BR-7717	TCGA	27.5996	WM_Score high	CIN	MSS	Negative
TCGA-CD-8527	TCGA	12.9987	WM_Score high	NA	MSI-L	NA
TCGA-IN-A6RR	TCGA	13.5252	WM_Score high	CIN	MSS	Negative
TCGA-BR-7959	TCGA	8.36405	WM_Score high	CIN	MSI-L	Negative
TCGA-RD-A8MV	TCGA	4.86792	WM_Score high	CIN	MSS	Negative
TCGA-BR-8484	TCGA	-13.8749	WM_Score low	CIN	MSS	Negative
TCGA-HU-A4GC	TCGA	7.72914	WM_Score high	CIN	MSI-L	Negative
TCGA-CD-5799	TCGA	16.5704	WM_Score high	CIN	MSS	Negative
TCGA-HU-A4H0	TCGA	-45.0682	WM_Score low	EBV	MSS	Positive
TCGA-FP-A4BF	TCGA	8.79709	WM_Score high	CIN	MSS	Negative
TCGA-BR-8380	TCGA	27.4926	WM_Score high	GS	MSI-L	Negative
TCGA-VQ-A91Q	TCGA	-3.41124	WM_Score high	CIN	MSS	Negative
TCGA-FP-7829	TCGA	-12.7206	WM_Score low	CIN	MSS	Negative
TCGA-HF-7134	TCGA	-7.26041	WM_Score low	NA	MSI-L	NA
TCGA-CG-4441	TCGA	7.51546	WM_Score high	GS	MSS	Negative
TCGA-FP-8631	TCGA	4.08708	WM_Score high	CIN	MSS	Negative
TCGA-BR-4279	TCGA	5.20308	WM_Score high	CIN	MSS	Negative
TCGA-IN-A6RJ	TCGA	37.3773	WM_Score high	CIN	MSS	Negative
TCGA-VQ-AA6J	TCGA	-16.4199	WM_Score low	CIN	MSS	Negative
TCGA-CD-5800	TCGA	1.30441	WM_Score high	CIN	MSS	Negative
TCGA-CG-4442	TCGA	-29.5593	WM_Score low	MSI	MSI-H	Negative
TCGA-CG-4465	TCGA	-27.6136	WM_Score low	MSI	MSI-H	Negative
TCGA-CG-5720	TCGA	18.5264	WM_Score high	CIN	MSI-L	Negative
TCGA-D7-6524	TCGA	22.7935	WM_Score high	GS	MSS	Negative
TCGA-CD-A486	TCGA	8.8019	WM_Score high	CIN	MSS	Negative
TCGA-CG-5716	TCGA	19.4839	WM_Score high	NA	MSS	NA
TCGA-RD-A7BT	TCGA	-24.7487	WM_Score low	NA	MSI-L	NA
TCGA-IN-A7NT	TCGA	-22.8646	WM_Score low	CIN	MSI-L	Negative
TCGA-BR-8296	TCGA	5.18057	WM_Score high	NA	MSS	NA
TCGA-BR-4187	TCGA	19.8532	WM_Score high	GS	MSS	Negative
TCGA-SW-A7EA	TCGA	10.0858	WM_Score high	MSI	MSI-H	Negative
TCGA-BR-6705	TCGA	35.7076	WM_Score high	CIN	MSI-L	Negative
TCGA-BR-A4QL	TCGA	3.9468	WM_Score high	NA	MSI-H	NA
TCGA-BR-7716	TCGA	2.67312	WM_Score high	CIN	MSS	Negative
TCGA-HU-8608	TCGA	-41.2997	WM_Score low	EBV	MSS	Positive
TCGA-F1-A72C	TCGA	5.29983	WM_Score high	CIN	MSS	Negative
TCGA-VQ-A8P3	TCGA	10.8678	WM_Score high	GS	MSS	Negative
TCGA-IP-7968	TCGA	-16.0448	WM_Score low	CIN	MSS	Negative
TCGA-BR-4280	TCGA	-23.4211	WM_Score low	MSI	MSI-H	Negative
TCGA-IN-7808	TCGA	8.38898	WM_Score high	CIN	MSS	Negative
TCGA-D7-8572	TCGA	-18.8949	WM_Score low	GS	MSS	Negative
TCGA-BR-8366	TCGA	7.58005	WM_Score high	EBV	MSS	Positive
TCGA-CD-A48A	TCGA	12.9211	WM_Score high	CIN	MSI-L	Negative
TCGA-VQ-A8PC	TCGA	-4.41944	WM_Score high	CIN	MSS	Negative
TCGA-D7-6528	TCGA	-13.4023	WM_Score low	MSI	MSI-L	Negative
TCGA-BR-6707	TCGA	0.542195	WM_Score high	EBV	MSS	Positive
TCGA-BR-8368	TCGA	-22.0905	WM_Score low	MSI	MSI-H	Negative
TCGA-VQ-A92D	TCGA	-0.631925	WM_Score high	CIN	MSI-L	Negative
TCGA-HU-A4H2	TCGA	3.82618	WM_Score high	CIN	MSS	Negative
TCGA-BR-8361	TCGA	-13.4873	WM_Score low	MSI	MSI-H	Negative
TCGA-VQ-A91Z	TCGA	-30.8946	WM_Score low	CIN	MSS	Negative
TCGA-D7-6527	TCGA	26.3851	WM_Score high	CIN	MSI-L	Negative
TCGA-RD-A8MW	TCGA	12.2068	WM_Score high	CIN	MSS	Negative
TCGA-D7-A6EX	TCGA	-0.857088	WM_Score high	CIN	MSS	Negative
TCGA-VQ-A927	TCGA	15.8638	WM_Score high	GS	MSS	Negative
TCGA-BR-4257	TCGA	-13.2807	WM_Score low	MSI	MSI-H	Negative
TCGA-CG-4475	TCGA	-10.7683	WM_Score low	CIN	MSS	Negative
TCGA-CD-5801	TCGA	23.032	WM_Score high	EBV	MSS	Positive
TCGA-VQ-A8PP	TCGA	-8.16447	WM_Score low	MSI	MSI-H	Negative
TCGA-RD-A7C1	TCGA	-7.81379	WM_Score low	CIN	MSS	Negative
TCGA-HU-8604	TCGA	-12.1546	WM_Score low	CIN	MSS	Negative
TCGA-BR-6456	TCGA	11.3043	WM_Score high	CIN	MSS	Negative
TCGA-BR-A4CR	TCGA	-57.1917	WM_Score low	CIN	MSS	Negative
TCGA-BR-7901	TCGA	18.5392	WM_Score high	CIN	MSS	Negative
TCGA-BR-4371	TCGA	-26.2644	WM_Score low	GS	MSS	Negative
TCGA-MX-A663	TCGA	13.3651	WM_Score high	CIN	MSS	Negative
TCGA-VQ-A8PF	TCGA	-13.2682	WM_Score low	EBV	MSS	Positive
TCGA-BR-7715	TCGA	-6.6272	WM_Score low	CIN	MSS	Negative
TCGA-BR-4367	TCGA	-19.8378	WM_Score low	NA	MSS	NA
TCGA-HF-7133	TCGA	-13.4656	WM_Score low	CIN	MSS	Negative
TCGA-D7-8575	TCGA	5.31308	WM_Score high	CIN	MSS	Negative
TCGA-BR-8077	TCGA	3.80659	WM_Score high	CIN	MSS	Negative
TCGA-CD-8531	TCGA	-8.89525	WM_Score low	GS	MSS	Negative
TCGA-IN-7806	TCGA	2.24687	WM_Score high	CIN	MSS	Negative
TCGA-BR-8485	TCGA	-23.5011	WM_Score low	CIN	MSS	Negative
TCGA-BR-4361	TCGA	-40.486	WM_Score low	MSI	MSI-H	Negative
TCGA-IN-A7NU	TCGA	27.194	WM_Score high	CIN	MSS	Negative
TCGA-HU-A4H5	TCGA	-18.4747	WM_Score low	CIN	MSS	Negative
TCGA-RD-A7BW	TCGA	32.4828	WM_Score high	CIN	MSS	Negative
TCGA-D7-8579	TCGA	21.7818	WM_Score high	GS	MSS	Negative
TCGA-BR-8486	TCGA	0.769694	WM_Score high	CIN	MSS	Negative
TCGA-RD-A8N6	TCGA	0.65175	WM_Score high	CIN	MSS	Negative
TCGA-D7-A4YX	TCGA	-27.5843	WM_Score low	EBV	MSS	Positive
TCGA-BR-A4CS	TCGA	15.7759	WM_Score high	CIN	MSS	Negative
TCGA-BR-4191	TCGA	-9.23157	WM_Score low	CIN	MSS	Negative
TCGA-B7-A5TI	TCGA	4.89838	WM_Score high	MSI	MSI-H	Negative
TCGA-CG-5722	TCGA	8.37931	WM_Score high	EBV	MSS	Positive
TCGA-CG-5726	TCGA	3.11414	WM_Score high	MSI	MSI-H	Negative
TCGA-D7-A748	TCGA	41.8366	WM_Score high	GS	MSS	Negative
TCGA-BR-8373	TCGA	-12.1663	WM_Score low	CIN	MSI-L	Negative
TCGA-BR-A4J7	TCGA	29.8752	WM_Score high	CIN	MSS	Negative
TCGA-HU-A4GH	TCGA	6.852	WM_Score high	MSI	MSS	Negative
TCGA-CG-4437	TCGA	23.8504	WM_Score high	MSI	MSI-L	Negative
TCGA-CG-4469	TCGA	-30.9625	WM_Score low	CIN	MSI-L	Negative
TCGA-VQ-A8PE	TCGA	-35.1628	WM_Score low	CIN	MSS	Negative
TCGA-CD-8534	TCGA	7.20182	WM_Score high	GS	MSS	Negative
TCGA-VQ-A94P	TCGA	33.0685	WM_Score high	CIN	MSS	Negative
TCGA-BR-8364	TCGA	24.3043	WM_Score high	CIN	MSS	Negative
TCGA-KB-A93J	TCGA	1.11467	WM_Score high	CIN	MSS	Negative
TCGA-BR-8080	TCGA	13.947	WM_Score high	CIN	MSS	Negative
TCGA-IN-8462	TCGA	35.0356	WM_Score high	CIN	MSI-L	Negative
TCGA-F1-6874	TCGA	-6.50454	WM_Score low	MSI	MSI-H	Negative
TCGA-CD-A487	TCGA	0.595191	WM_Score high	CIN	MSS	Negative
TCGA-CG-4301	TCGA	-8.84405	WM_Score low	CIN	MSS	Negative
TCGA-BR-8060	TCGA	-24.233	WM_Score low	NA	MSS	NA
TCGA-HU-A4HD	TCGA	-7.65432	WM_Score low	CIN	MSI-L	Negative
TCGA-BR-8369	TCGA	0.120991	WM_Score high	CIN	MSS	Negative
TCGA-BR-4267	TCGA	0.791066	WM_Score high	CIN	MSS	Negative
TCGA-BR-8284	TCGA	-4.75982	WM_Score high	MSI	MSI-H	Negative
TCGA-VQ-A8PD	TCGA	-0.0383413	WM_Score high	GS	MSS	Negative
TCGA-VQ-A922	TCGA	-20.2595	WM_Score low	CIN	MSI-L	Negative
TCGA-VQ-A8PB	TCGA	-39.3315	WM_Score low	MSI	MSI-H	Negative
TCGA-FP-8210	TCGA	20.9064	WM_Score high	GS	MSS	Negative
TCGA-RD-A8N0	TCGA	12.8345	WM_Score high	GS	MSS	Negative
TCGA-BR-8289	TCGA	-4.44968	WM_Score high	CIN	MSS	Negative
TCGA-HU-A4GJ	TCGA	-3.86512	WM_Score high	NA	MSS	NA
TCGA-HU-A4H3	TCGA	-1.31787	WM_Score high	MSI	MSI-H	Negative
TCGA-VQ-A8P2	TCGA	-31.9843	WM_Score low	MSI	MSI-H	Negative
TCGA-BR-8687	TCGA	14.3298	WM_Score high	CIN	MSS	Negative
TCGA-BR-4253	TCGA	-52.8518	WM_Score low	EBV	MSS	Positive
TCGA-BR-8381	TCGA	-14.1034	WM_Score low	EBV	MSS	Positive
TCGA-FP-7998	TCGA	-5.82604	WM_Score low	EBV	MSS	Positive
TCGA-VQ-A8DZ	TCGA	3.10992	WM_Score high	CIN	MSS	Negative
TCGA-HU-A4GD	TCGA	-13.749	WM_Score low	CIN	MSS	Negative
TCGA-VQ-A8DV	TCGA	-1.63863	WM_Score high	CIN	MSS	Negative
TCGA-CG-4306	TCGA	-27.819	WM_Score low	MSI	MSI-H	Negative
TCGA-VQ-A8PH	TCGA	-18.1317	WM_Score low	CIN	MSS	Negative
TCGA-R5-A7ZR	TCGA	5.4733	WM_Score high	CIN	MSS	Negative
TCGA-BR-6564	TCGA	54.7997	WM_Score high	CIN	MSS	Negative
TCGA-IN-A6RN	TCGA	18.7725	WM_Score high	CIN	MSS	Negative
TCGA-VQ-A928	TCGA	2.49957	WM_Score high	GS	MSS	Negative
TCGA-BR-7958	TCGA	-3.00454	WM_Score high	EBV	MSS	Positive
TCGA-CG-4305	TCGA	-13.8073	WM_Score low	MSI	MSI-H	Negative
