# Supplementary material for: Cross-talk of RNA modification "writers" describes tumor stemness and microenvironment and guides personalized immunotherapy for gastric cancer
Source: Aging (Albany NY). 2023 Jun 14;15(12):5445–81. doi: 10.18632/aging.204802 (PMC10333070; doi:10.18632/aging.204802)
Supplement: Supplementary Table 6 [file aging-15-204802-s007.xlsx]

## Sheet: Sheet1
Supplementary Table 6. The differentially activated biological pathways between distinct RNA modification patterns by GSVA enrichment analysis.
WM_Cluster D vs WM_Cluster A
Pathway	logFC	AveExpr	t	P.Value	adj.P.Val	B
MISMATCH_REPAIR	0.289918	0.0953942	11.3668	5.19985e-27	6.65581e-25	50.5226
DNA_REPLICATION	0.299154	0.109777	10.476	1.61789e-23	1.03545e-21	42.5864
CELL_CYCLE	0.188916	0.070083	10.157	2.60215e-22	1.11025e-20	39.8476
NUCLEOTIDE_EXCISION_REPAIR	0.19993	0.0699191	9.92255	1.93285e-21	6.18511e-20	37.8715
SPLICEOSOME	0.176881	0.0484045	9.53512	4.95313e-20	1.268e-18	34.6766
HOMOLOGOUS_RECOMBINATION	0.215856	0.0499244	8.73855	2.92858e-17	5.35512e-16	28.3981
FOCAL_ADHESION	-0.153302	-0.0439427	-8.71599	3.48837e-17	5.58139e-16	28.2262
RNA_DEGRADATION	0.173638	0.059856	8.48274	2.08712e-16	2.96835e-15	26.4687
BASAL_TRANSCRIPTION_FACTORS	0.147854	0.0643463	8.46713	2.34951e-16	3.00737e-15	26.3524
RNA_POLYMERASE	0.187646	0.0594905	8.23853	1.30673e-15	1.52055e-14	24.6678
BASE_EXCISION_REPAIR	0.172885	0.0571864	7.1399	3.0059e-12	2.56503e-11	17.0859
ECM_RECEPTOR_INTERACTION	-0.155263	-0.0514203	-6.67551	6.08763e-11	4.8701e-10	14.1499
ADHERENS_JUNCTION	-0.101837	-0.0271914	-6.42446	2.89128e-10	2.17697e-09	12.6324
NON_HOMOLOGOUS_END_JOINING	0.160369	0.0229428	6.4007	3.34226e-10	2.37672e-09	12.4913
CYTOSOLIC_DNA_SENSING_PATHWAY	0.102347	0.0177943	5.46912	6.90451e-08	3.27325e-07	7.32255
WM_Cluster D vs WM_Cluster B
Pathway	logFC	AveExpr	t	P.Value	adj.P.Val	B
DNA_REPLICATION	0.540088	-0.0287552	19.6687	7.04213e-65	9.01393e-63	136.967
CELL_CYCLE	0.34409	-0.0191984	19.2927	4.96237e-63	3.17592e-61	132.728
NUCLEOTIDE_EXCISION_REPAIR	0.353141	-0.0180214	18.3619	1.7533e-58	7.48073e-57	122.299
MISMATCH_REPAIR	0.458964	-0.00054044	18.197	1.10829e-57	3.54653e-56	120.462
SPLICEOSOME	0.32977	-0.0397088	17.6004	8.49354e-55	2.17435e-53	113.849
RNA_POLYMERASE	0.382952	-0.0536737	17.2306	5.06704e-53	1.08097e-51	109.778
HOMOLOGOUS_RECOMBINATION	0.387197	-0.0485441	16.4427	2.84142e-49	5.19573e-48	101.185
BASAL_TRANSCRIPTION_FACTORS	0.286783	-0.0159243	16.3954	4.74989e-49	7.59983e-48	100.674
RNA_DEGRADATION	0.323295	-0.0263867	16.3772	5.7901e-49	8.23481e-48	100.477
BASE_EXCISION_REPAIR	0.353	-0.0471777	15.3644	3.10217e-44	3.97077e-43	89.6403
FOCAL_ADHESION	-0.244025	0.00757907	-13.3631	3.01081e-35	3.50349e-34	69.0613
OOCYTE_MEIOSIS	0.121983	-0.0133035	12.2882	1.1462e-30	1.22261e-29	58.5832
ECM_RECEPTOR_INTERACTION	-0.277657	0.0189019	-11.6522	4.69461e-28	4.62238e-27	52.6122
CALCIUM_SIGNALING_PATHWAY	-0.157013	0.00391536	-11.6279	5.88988e-28	5.38504e-27	52.3871
INSULIN_SIGNALING_PATHWAY	-0.109556	-0.0165975	-11.501	1.9117e-27	1.63132e-26	51.2189
TGF_BETA_SIGNALING_PATHWAY	-0.16514	0.0348007	-10.7468	1.77943e-24	1.42354e-23	44.4397
CELL_ADHESION_MOLECULES_CAMS	-0.20067	0.0537321	-10.1564	3.06692e-22	2.30921e-21	39.338
MTOR_SIGNALING_PATHWAY	-0.148907	0.00463016	-10.1233	4.07051e-22	2.89459e-21	39.0576
ADHERENS_JUNCTION	-0.155089	0.00286348	-10.1023	4.87146e-22	3.28183e-21	38.8798
NON_HOMOLOGOUS_END_JOINING	0.252398	-0.029244	10.0605	6.95473e-22	4.45103e-21	38.5273
GNRH_SIGNALING_PATHWAY	-0.116816	-0.00344838	-9.99039	1.26154e-21	7.68942e-21	37.9377
UBIQUITIN_MEDIATED_PROTEOLYSIS	0.114914	-0.0109833	9.41573	1.49304e-19	8.68676e-19	33.2147
MAPK_SIGNALING_PATHWAY	-0.100192	0.00457048	-9.23838	6.26439e-19	3.48627e-18	31.797
GLIOMA	-0.102501	-0.00636375	-7.9554	1.11326e-14	5.08917e-14	22.1415
CHEMOKINE_SIGNALING_PATHWAY	-0.137242	0.0339461	-7.82531	2.8256e-14	1.24716e-13	21.2245
P53_SIGNALING_PATHWAY	0.119659	0.0265827	7.62418	1.16562e-13	4.81287e-13	19.8303
RENIN_ANGIOTENSIN_SYSTEM	-0.165473	0.0413396	-7.46391	3.53265e-13	1.41306e-12	18.7402
CYTOSOLIC_DNA_SENSING_PATHWAY	0.131487	0.0020842	7.14079	3.12429e-12	1.1426e-11	16.5995
ACUTE_MYELOID_LEUKEMIA	-0.10565	-0.0149605	-6.73879	4.22834e-11	1.38776e-10	14.0456
BASAL_CELL_CARCINOMA	-0.103772	-0.0138333	-6.42912	2.89631e-10	8.82686e-10	12.1632
WM_Cluster D vs WM_Cluster C
Pathway	logFC	AveExpr	t	P.Value	adj.P.Val	B
NOTCH_SIGNALING_PATHWAY	-0.184706	0.0130309	-10.982	7.83169e-25	1.00246e-22	45.6157
P53_SIGNALING_PATHWAY	0.163211	0.0173084	9.93769	4.881e-21	3.12384e-19	37.002
MISMATCH_REPAIR	0.275138	0.136782	9.71695	2.89743e-20	1.23624e-18	35.2479
NUCLEOTIDE_EXCISION_REPAIR	0.188803	0.0989211	8.43842	5.27103e-16	1.34938e-14	25.6019
CELL_CYCLE	0.164958	0.104112	8.18147	3.38284e-15	7.21672e-14	23.7773
PROTEIN_EXPORT	0.215225	-0.0374082	7.88072	2.83162e-14	5.17782e-13	21.6937
BASAL_TRANSCRIPTION_FACTORS	0.149552	0.0809027	7.40817	7.10583e-13	1.01061e-11	18.538
DNA_REPLICATION	0.212302	0.187765	7.02746	8.5632e-12	9.96445e-11	16.105
BASAL_CELL_CARCINOMA	-0.124752	-0.0140636	-7.00658	9.7879e-12	1.04404e-10	15.9744
PANTOTHENATE_AND_COA_BIOSYNTHESIS	0.150128	0.0114959	6.72942	5.60881e-11	5.12805e-10	14.271
TYPE_I_DIABETES_MELLITUS	0.222886	-0.0420916	6.6638	8.4134e-11	7.17943e-10	13.8757
RNA_DEGRADATION	0.141771	0.0959846	6.23346	1.11298e-09	8.90381e-09	11.3622
GRAFT_VERSUS_HOST_DISEASE	0.244116	-0.0485216	6.20909	1.28306e-09	9.66069e-09	11.224
SYSTEMIC_LUPUS_ERYTHEMATOSUS	0.176517	-0.0550533	6.08437	2.63843e-09	1.86906e-08	10.5238
NOD_LIKE_RECEPTOR_SIGNALING_PATHWAY	0.14249	-0.0160011	6.05738	3.07925e-09	1.97072e-08	10.3738
LEISHMANIA_INFECTION	0.170433	-0.0594414	6.02692	3.66326e-09	2.23284e-08	10.2052
AUTOIMMUNE_THYROID_DISEASE	0.179066	-0.0405297	5.79156	1.36949e-08	7.62149e-08	8.9268
ALLOGRAFT_REJECTION	0.221444	-0.0534579	5.72939	1.92659e-08	1.02751e-07	8.59633
ANTIGEN_PROCESSING_AND_PRESENTATION	0.162083	-0.0114326	5.61136	3.65293e-08	1.8703e-07	7.97738
PORPHYRIN_AND_CHLOROPHYLL_METABOLISM	0.115327	0.0126921	5.43634	9.24881e-08	4.38462e-07	7.07994
PENTOSE_AND_GLUCURONATE_INTERCONVERSIONS	0.136251	-0.00955584	5.11633	4.75103e-07	1.78862e-06	5.50324
PROPANOATE_METABOLISM	0.118779	-0.022212	5.035	7.10876e-07	2.52756e-06	5.11593
SPLICEOSOME	0.100205	0.106995	4.79546	2.25851e-06	6.88309e-06	4.00725
VALINE_LEUCINE_AND_ISOLEUCINE_DEGRADATION	0.108379	-0.0386556	4.57743	6.21104e-06	1.72829e-05	3.0403
PRIMARY_IMMUNODEFICIENCY	0.116596	-0.0353269	3.64183	0.000304581	0.000639121	-0.639297
