# Supplementary material for: Cross-talk of RNA modification "writers" describes tumor stemness and microenvironment and guides personalized immunotherapy for gastric cancer
Source: Aging (Albany NY). 2023 Jun 14;15(12):5445–81. doi: 10.18632/aging.204802 (PMC10333070; doi:10.18632/aging.204802)
Supplement: Supplementary Table 8 [file aging-15-204802-s009.xlsx]

## Sheet: Sheet1
Supplementary Table 8. Estimation of the relative abundance of TME infiltrating cells for patients in the meta-GEO cohort by ssGSEA.
Patient ID	Activated.B.cell	Activated.CD4.T.cell	Activated.CD8.T.cell	Activated.dendritic.cell	CD56bright.natural.killer.cell	CD56dim.natural.killer.cell	Eosinophil	Gamma.delta.T.cell	Immature..B.cell	Immature.dendritic.cell	MDSC	Macrophages M1	Macrophages M2	Mast.cell	Monocyte	Natural.killer.T.cell	Natural.killer.cell	Neutrophil	Plasmacytoid.dendritic.cell	Regulatory.T.cell	T.follicular.helper.cell	Type.1.T.helper.cell	Type.17.T.helper.cell	Type.2.T.helper.cell
GSM387789	0.340129	0.714923	0.760598	0.708507	0.660236	0.675061	0.334577	0.74411	0.506257	0.758789	0.841982	0.599526	0.378654	0.564984	0.742169	0.576968	0.691498	0.260077	0.750627	0.639838	0.628746	0.614078	0.473633	0.580905
GSM387791	0.786588	0.854905	0.857025	0.779575	0.742565	0.624746	0.283241	0.667543	0.711565	0.7288	0.795062	0.485307	0.425254	0.411975	0.73802	0.489921	0.611016	0.208507	0.715059	0.585192	0.593272	0.599104	0.439214	0.599929
GSM387792	0.227091	0.653448	0.633427	0.650345	0.683133	0.691722	0.353588	0.699256	0.29016	0.711362	0.682223	0.383224	0.2961	0.46367	0.72197	0.529077	0.58984	0.336225	0.78081	0.531008	0.572369	0.542104	0.420577	0.615679
GSM387794	0.227373	0.509393	0.685357	0.641879	0.698258	0.638948	0.266513	0.660967	0.332261	0.770012	0.668773	0.362195	0.35659	0.577168	0.705239	0.549417	0.651308	0.138348	0.737855	0.581873	0.574468	0.577654	0.392664	0.565691
GSM387795	0.240773	0.568903	0.637123	0.583833	0.602738	0.58404	0.289486	0.638214	0.389906	0.76	0.588782	0.136464	0.163424	0.572197	0.687624	0.526289	0.619761	0.0468736	0.732123	0.508438	0.510199	0.550042	0.341767	0.583549
GSM387796	0.266832	0.606259	0.699029	0.687103	0.713734	0.719408	0.18676	0.601921	0.375826	0.650296	0.590533	0.553184	0.395004	0.454762	0.695529	0.504116	0.559391	0.237041	0.690661	0.360299	0.500543	0.570215	0.447718	0.541956
GSM387800	0.308095	0.605338	0.609744	0.677013	0.695048	0.696446	0.337868	0.661695	0.422465	0.74782	0.625069	0.476932	0.274819	0.447815	0.753656	0.516143	0.593822	0.220925	0.735313	0.480252	0.532561	0.565093	0.445693	0.530545
GSM387801	0.172498	0.688863	0.62905	0.665243	0.674222	0.714488	0.343116	0.682513	0.351651	0.744889	0.566086	0.440426	0.412599	0.451303	0.713063	0.511306	0.572628	0.293724	0.698902	0.469518	0.520318	0.530058	0.399677	0.573336
GSM387802	0.574564	0.779654	0.785682	0.730917	0.725755	0.682218	0.32914	0.663363	0.60414	0.692139	0.778786	0.781066	0.49871	0.519035	0.756011	0.593122	0.636916	0.345253	0.735788	0.529427	0.572737	0.609869	0.489305	0.606435
GSM387803	0.305443	0.732532	0.594326	0.677915	0.676645	0.64736	0.196886	0.635512	0.372251	0.655016	0.541533	0.47552	0.462737	0.394624	0.7329	0.494904	0.515898	0.204451	0.651414	0.396327	0.468906	0.51669	0.460774	0.538361
GSM387804	0.250731	0.52155	0.688418	0.637113	0.63292	0.614847	0.305897	0.639327	0.359268	0.767092	0.726009	0.325287	0.346721	0.56408	0.720972	0.506869	0.629801	0.101133	0.733317	0.561036	0.55939	0.589352	0.384882	0.531228
GSM387805	0.220847	0.754441	0.720261	0.688942	0.69583	0.667016	0.273653	0.676008	0.397218	0.73879	0.622072	0.524831	0.353919	0.373277	0.739674	0.496912	0.550923	0.177753	0.722563	0.475999	0.504102	0.578223	0.446334	0.617647
GSM387806	0.617996	0.76406	0.848606	0.721467	0.738487	0.691018	0.441471	0.738874	0.521414	0.758256	0.849592	0.443901	0.486115	0.627689	0.768224	0.570821	0.633262	0.210913	0.763775	0.634773	0.629749	0.644506	0.412963	0.63128
GSM387807	0.242704	0.684885	0.498723	0.724823	0.691433	0.677638	0.16262	0.736196	0.333969	0.76818	0.676414	0.774294	0.277827	0.497231	0.703108	0.529786	0.603686	0.317021	0.740169	0.527996	0.565248	0.5586	0.511954	0.569128
GSM387808	0.158865	0.690678	0.525116	0.65222	0.632554	0.675351	0.252146	0.730213	0.291014	0.768027	0.561214	0.441161	0.347276	0.414663	0.702929	0.522381	0.558685	0.247004	0.719831	0.492086	0.551404	0.546068	0.400729	0.630388
GSM387809	0.133664	0.704427	0.553612	0.658452	0.66513	0.710365	0.317628	0.660801	0.320564	0.709281	0.602313	0.284154	0.432734	0.510176	0.752576	0.555855	0.575621	0.17276	0.73881	0.450339	0.509296	0.542388	0.416475	0.618439
GSM387810	0.703288	0.80189	0.73296	0.70139	0.687798	0.606825	0.394132	0.726718	0.585171	0.74098	0.744849	0.370385	0.404752	0.328313	0.782879	0.533639	0.585631	0.172583	0.683857	0.522109	0.598326	0.570781	0.429267	0.573015
GSM387811	0.179199	0.737883	0.614146	0.716882	0.726956	0.718501	0.270038	0.748853	0.404054	0.786068	0.660362	0.595429	0.428647	0.499594	0.705531	0.587092	0.640273	0.311825	0.762578	0.601952	0.555345	0.578242	0.42676	0.579392
GSM387812	0.332564	0.726978	0.67888	0.7114	0.683391	0.646123	0.31508	0.758391	0.467176	0.758195	0.75188	0.426194	0.397482	0.580611	0.708683	0.562839	0.637742	0.230741	0.733617	0.597286	0.620105	0.589272	0.43371	0.550327
GSM387813	0.183447	0.718591	0.665309	0.699438	0.667871	0.691372	0.240762	0.700116	0.287648	0.714703	0.591311	0.47219	0.345159	0.394406	0.710694	0.568615	0.594872	0.224288	0.67032	0.491299	0.520198	0.568013	0.441343	0.586747
GSM387814	0.594472	0.783226	0.839924	0.731333	0.7067	0.649588	0.455794	0.705052	0.57885	0.744443	0.85239	0.366839	0.437343	0.585776	0.761935	0.573444	0.652184	0.162203	0.766798	0.622855	0.637148	0.651375	0.401292	0.624019
GSM387815	0.416548	0.649821	0.684008	0.665023	0.715107	0.632467	0.367451	0.684128	0.352855	0.756268	0.634575	0.457827	0.261407	0.353194	0.719978	0.476883	0.541603	0.16581	0.707856	0.453946	0.529846	0.564259	0.443227	0.58255
GSM387816	0.415229	0.791746	0.827718	0.685986	0.643967	0.601159	0.378744	0.714388	0.441341	0.759384	0.785627	0.619305	0.375062	0.519725	0.753844	0.554773	0.657485	0.036998	0.741615	0.647623	0.599186	0.614214	0.428991	0.602439
GSM387817	0.416824	0.653867	0.612657	0.650207	0.656351	0.666372	0.335383	0.690931	0.385721	0.729428	0.623829	0.399356	0.447705	0.443469	0.727515	0.489906	0.515686	0.243143	0.727751	0.470577	0.523253	0.541967	0.410104	0.574728
GSM387818	0.174154	0.684288	0.606774	0.696543	0.612755	0.659385	0.234421	0.693416	0.265324	0.722898	0.626849	0.269298	0.458724	0.442671	0.753374	0.504462	0.55662	0.324064	0.705201	0.520167	0.495661	0.547229	0.412419	0.531931
GSM387819	0.275638	0.627263	0.673052	0.707341	0.731993	0.685792	0.449169	0.762318	0.407874	0.790583	0.839994	0.387411	0.544481	0.717787	0.751204	0.615509	0.64412	0.34749	0.810584	0.691758	0.660015	0.614335	0.400682	0.563195
GSM387820	0.420786	0.7296	0.719027	0.711747	0.684892	0.667642	0.391994	0.706694	0.417472	0.799497	0.735181	0.369053	0.396995	0.506268	0.742009	0.521402	0.563761	0.20941	0.72554	0.54063	0.554089	0.574499	0.416378	0.594317
GSM387821	0.423788	0.62405	0.685047	0.657967	0.722294	0.618138	0.439695	0.716271	0.423845	0.740645	0.617819	0.380082	0.152959	0.541143	0.709763	0.482727	0.574648	0.239674	0.773944	0.493069	0.536389	0.570446	0.41183	0.601166
GSM387822	0.0925834	0.667137	0.562349	0.735267	0.685912	0.680037	0.247343	0.709661	0.38931	0.779674	0.690999	0.427165	0.278291	0.442941	0.726098	0.546116	0.638667	0.158295	0.728459	0.557749	0.573193	0.566667	0.450314	0.54309
GSM387823	0.227379	0.670388	0.67207	0.698819	0.721505	0.672596	0.255721	0.737039	0.413095	0.771655	0.752072	0.521857	0.467264	0.493629	0.69235	0.556185	0.600164	0.185508	0.755165	0.612765	0.614157	0.574172	0.382111	0.538285
GSM387824	0.336106	0.609878	0.734705	0.712951	0.66214	0.573645	0.410768	0.797501	0.464825	0.783388	0.844952	0.403608	0.424677	0.751321	0.755366	0.574577	0.646793	0.255764	0.775983	0.713249	0.599538	0.602082	0.320454	0.604161
GSM387825	0.43598	0.650019	0.714204	0.687853	0.709178	0.65724	0.345587	0.703535	0.385248	0.737756	0.748578	0.513397	0.41176	0.51098	0.756903	0.54324	0.62348	0.269199	0.779507	0.586022	0.600762	0.576595	0.406876	0.522158
GSM387826	0.359285	0.527187	0.723434	0.649058	0.621428	0.565852	0.350118	0.69718	0.482548	0.743202	0.711548	0.302548	0.207117	0.614236	0.701761	0.535896	0.640814	0.0608358	0.73418	0.585411	0.595673	0.58692	0.353504	0.562488
GSM387827	0.182517	0.573171	0.598194	0.655574	0.621208	0.578516	0.297719	0.721435	0.30902	0.730432	0.706669	0.34932	0.364574	0.639155	0.696714	0.54294	0.649456	0.265499	0.760677	0.627339	0.556425	0.52782	0.384106	0.561898
GSM387828	0.312031	0.783728	0.796665	0.772295	0.694008	0.656247	0.330882	0.786015	0.487384	0.78352	0.796109	0.551846	0.335549	0.4873	0.721468	0.587756	0.608129	0.138999	0.735577	0.722263	0.623507	0.589847	0.444923	0.535179
GSM387829	0.665557	0.655749	0.754516	0.705063	0.706324	0.660685	0.436491	0.761331	0.563954	0.770898	0.789833	0.294534	0.383835	0.591847	0.733825	0.498363	0.616729	0.2775	0.751461	0.632324	0.602663	0.610932	0.404151	0.559487
GSM387830	0.313769	0.755083	0.792893	0.721017	0.697292	0.688774	0.300244	0.684153	0.404424	0.742474	0.796068	0.471272	0.376939	0.467232	0.759634	0.562557	0.638936	0.149133	0.757577	0.636192	0.614014	0.602091	0.429718	0.56277
GSM387831	0.36	0.72905	0.692275	0.707865	0.700633	0.671624	0.358824	0.686596	0.349523	0.773696	0.707634	0.493307	0.422915	0.52507	0.728892	0.536405	0.597871	0.322871	0.74884	0.592873	0.568008	0.543837	0.424505	0.60937
GSM387832	0.509768	0.582486	0.712864	0.66727	0.703435	0.600214	0.415027	0.74564	0.548208	0.73078	0.705837	0.303266	0.383973	0.637129	0.732124	0.548144	0.617286	0.187717	0.79031	0.5948	0.644208	0.607295	0.419687	0.559833
GSM387833	0.177073	0.594485	0.574607	0.690141	0.705869	0.723728	0.195731	0.728259	0.264459	0.759507	0.674088	0.467088	0.431621	0.445104	0.728732	0.542488	0.603908	0.0759416	0.72385	0.531911	0.60714	0.546944	0.403017	0.528912
GSM387834	0.282523	0.660336	0.673473	0.678002	0.732921	0.628518	0.371049	0.702462	0.392204	0.757617	0.672332	0.419405	0.271339	0.646504	0.696734	0.53218	0.637309	0.115395	0.760422	0.595163	0.592546	0.591315	0.400186	0.640352
GSM387835	0.540346	0.793397	0.84238	0.815645	0.715518	0.641264	0.367476	0.76602	0.585162	0.799601	0.9412	0.471776	0.460389	0.596987	0.748593	0.576794	0.673468	0.481789	0.829208	0.738179	0.698604	0.67282	0.448217	0.569835
GSM387836	0.194024	0.692494	0.643705	0.685142	0.666418	0.630684	0.368379	0.657399	0.359765	0.742603	0.644838	0.360394	0.308098	0.494976	0.691469	0.534314	0.635824	0.153836	0.713778	0.501665	0.55787	0.576939	0.429426	0.568717
GSM387837	0.189424	0.653209	0.666318	0.65191	0.690897	0.631906	0.365435	0.658933	0.296194	0.722649	0.636813	0.526867	0.336001	0.484734	0.676463	0.546126	0.629804	0.128936	0.769613	0.522225	0.580858	0.580748	0.423173	0.603605
GSM387838	0.296966	0.532399	0.665712	0.731777	0.68689	0.573494	0.494729	0.783529	0.466732	0.789086	0.823091	0.330781	0.470647	0.781804	0.7502	0.549741	0.656246	0.394159	0.820909	0.669215	0.602468	0.614323	0.303645	0.582319
GSM387839	0.25966	0.726115	0.752146	0.720031	0.686163	0.695588	0.300715	0.731695	0.427444	0.747802	0.776453	0.507978	0.378314	0.39892	0.757796	0.543694	0.595871	0.204995	0.726828	0.597382	0.556825	0.576997	0.437437	0.60674
GSM387840	0.266451	0.466223	0.659343	0.619798	0.629837	0.569002	0.35056	0.677926	0.326618	0.757955	0.664892	0.245198	0.302832	0.692021	0.701664	0.539186	0.628256	0.0941483	0.752465	0.581801	0.537665	0.546754	0.305137	0.582041
GSM387841	0.523521	0.657541	0.777291	0.719858	0.699055	0.639402	0.470782	0.784807	0.556199	0.784124	0.873946	0.330224	0.545143	0.669148	0.752195	0.600883	0.665875	0.216787	0.805124	0.74854	0.675695	0.647699	0.42327	0.579182
GSM387842	0.216749	0.708366	0.715186	0.696504	0.65808	0.668697	0.3337	0.721386	0.376772	0.774269	0.747087	0.446241	0.419405	0.458327	0.728633	0.588986	0.610906	0.198206	0.720822	0.604507	0.595814	0.579844	0.36633	0.679247
GSM387843	0.249093	0.618784	0.649644	0.613524	0.691922	0.672883	0.279193	0.680916	0.277162	0.691413	0.605152	0.278182	0.515534	0.375582	0.755235	0.503152	0.57419	0.121515	0.744707	0.568352	0.576224	0.498048	0.323202	0.587507
GSM387845	0.316428	0.704923	0.670172	0.699604	0.73634	0.66897	0.348545	0.731595	0.449166	0.791477	0.76507	0.511254	0.428807	0.579816	0.723013	0.58956	0.645056	0.209395	0.756062	0.603489	0.588597	0.619344	0.450655	0.640048
GSM387846	0.236052	0.702874	0.72509	0.731196	0.681712	0.695669	0.301442	0.743376	0.420084	0.734712	0.779658	0.497172	0.487643	0.537596	0.750463	0.589272	0.650331	0.276803	0.729626	0.653794	0.597929	0.611661	0.435687	0.613517
GSM387847	0.258173	0.509567	0.711909	0.653513	0.707459	0.618809	0.491376	0.749866	0.404279	0.773993	0.75693	0.228598	0.320158	0.733463	0.744062	0.552849	0.628546	0.280181	0.797092	0.646266	0.643736	0.587109	0.332462	0.561972
GSM387848	0.562002	0.711173	0.842647	0.743291	0.745827	0.691184	0.451746	0.709121	0.452327	0.77182	0.84994	0.418369	0.441109	0.588562	0.800783	0.570717	0.645059	0.267177	0.776142	0.623725	0.610286	0.640596	0.442529	0.593432
GSM387849	0.184378	0.670205	0.669998	0.747784	0.731578	0.669936	0.376198	0.790024	0.348923	0.788525	0.792001	0.373803	0.499318	0.684447	0.754739	0.596258	0.652941	0.331504	0.806755	0.709598	0.61254	0.628018	0.407134	0.567629
GSM387850	0.574811	0.662959	0.806722	0.718541	0.727153	0.636989	0.45372	0.766523	0.51462	0.788256	0.870129	0.291909	0.449904	0.721784	0.773324	0.601774	0.653951	0.265913	0.792849	0.691675	0.641481	0.639006	0.367161	0.589364
GSM387851	0.278097	0.573421	0.679589	0.673025	0.652614	0.642102	0.276128	0.656266	0.429324	0.794081	0.793959	0.362681	0.494141	0.556689	0.743079	0.570394	0.662444	0.0685076	0.783906	0.611107	0.610136	0.594537	0.418464	0.570604
GSM387852	0.144318	0.54429	0.636364	0.736063	0.702738	0.666874	0.320185	0.763352	0.283954	0.758393	0.780335	0.406667	0.499495	0.576286	0.761184	0.582622	0.627492	0.275024	0.793232	0.64082	0.605427	0.585044	0.423337	0.551052
GSM387853	0.315985	0.530332	0.667841	0.663613	0.639153	0.596258	0.414768	0.68014	0.446483	0.749696	0.717792	0.308631	0.505517	0.681101	0.735485	0.531677	0.628408	0.138381	0.756973	0.594702	0.556913	0.560267	0.348747	0.569603
GSM387854	0.24339	0.656361	0.640447	0.630039	0.667417	0.633132	0.326953	0.727776	0.244741	0.66237	0.525043	0.147514	0.492865	0.315171	0.738315	0.442831	0.504292	0.078056	0.690085	0.500477	0.499893	0.48143	0.281677	0.598948
GSM387855	0.080193	0.657418	0.547768	0.656682	0.646521	0.663136	0.221876	0.651176	0.32089	0.730995	0.540784	0.461591	0.33885	0.385724	0.729259	0.519021	0.521573	0.186048	0.708505	0.445722	0.503737	0.536274	0.435184	0.574574
GSM387856	0.211311	0.733242	0.707241	0.796302	0.716464	0.70789	0.369937	0.768498	0.417472	0.792068	0.820768	0.524508	0.53608	0.589528	0.756262	0.600974	0.659342	0.451244	0.806725	0.708963	0.649366	0.634251	0.425101	0.565142
GSM387857	0.609611	0.641771	0.723846	0.668978	0.69924	0.641595	0.476336	0.665238	0.526198	0.734921	0.789005	0.291398	0.442262	0.6165	0.763794	0.550747	0.643201	0.125754	0.7927	0.61946	0.595318	0.630548	0.373133	0.563242
GSM387858	0.209278	0.662383	0.74556	0.690719	0.727703	0.676822	0.355245	0.698267	0.402927	0.770221	0.79857	0.364461	0.454709	0.576796	0.726777	0.552024	0.625427	0.240088	0.787752	0.639435	0.620894	0.580017	0.390294	0.591021
GSM387859	0.601511	0.710441	0.869124	0.768781	0.687697	0.701169	0.441749	0.811073	0.538986	0.743832	0.929486	0.495014	0.592762	0.620501	0.806654	0.635678	0.68176	0.424391	0.830036	0.761964	0.64926	0.669082	0.382915	0.559404
GSM387860	0.527905	0.700015	0.797807	0.751802	0.727029	0.69722	0.449786	0.721824	0.514875	0.783566	0.897237	0.527271	0.476654	0.606048	0.798381	0.580612	0.634088	0.322847	0.770625	0.661028	0.640698	0.662963	0.484522	0.603362
GSM387861	0.200894	0.728279	0.648664	0.706631	0.705474	0.707765	0.317204	0.750283	0.411511	0.747787	0.695958	0.501135	0.257751	0.547641	0.753299	0.527009	0.577881	0.129865	0.75569	0.562662	0.604617	0.576188	0.475319	0.681439
GSM387862	0.388049	0.632316	0.704722	0.732465	0.687641	0.654236	0.298622	0.741145	0.395008	0.767728	0.841083	0.311094	0.467818	0.600658	0.755114	0.587888	0.662747	0.257164	0.795185	0.678016	0.593888	0.638291	0.423872	0.587422
GSM387863	0.543726	0.651245	0.699215	0.742853	0.681701	0.652078	0.437298	0.754751	0.424036	0.742706	0.806892	0.501957	0.562367	0.70126	0.760984	0.580181	0.631146	0.324752	0.846496	0.640691	0.618221	0.650139	0.375092	0.57581
GSM387864	0.340818	0.712822	0.662303	0.71689	0.693641	0.693056	0.225515	0.652412	0.350451	0.794457	0.728722	0.727676	0.503564	0.501212	0.715927	0.593695	0.608139	0.263451	0.733242	0.547035	0.561261	0.571922	0.518395	0.546069
GSM387865	0.226807	0.665548	0.582522	0.649608	0.717345	0.684088	0.350792	0.698788	0.289814	0.73542	0.690336	0.218144	0.360532	0.486786	0.690511	0.554984	0.604774	0.135115	0.736997	0.559825	0.559705	0.522572	0.368103	0.538239
GSM387866	0.300626	0.585152	0.731462	0.749273	0.740043	0.657569	0.37907	0.797398	0.379716	0.798467	0.842435	0.322267	0.398674	0.638135	0.766382	0.58249	0.654115	0.356823	0.818003	0.666544	0.656379	0.615219	0.416051	0.541718
GSM387867	0.42809	0.694271	0.652621	0.723738	0.725924	0.675638	0.464784	0.736461	0.425707	0.768302	0.77016	0.405977	0.39882	0.548598	0.74372	0.538149	0.590644	0.251636	0.746199	0.581799	0.574886	0.600264	0.437842	0.616218
GSM387868	0.392865	0.699161	0.712985	0.783248	0.687337	0.628613	0.445878	0.759434	0.496301	0.813006	0.908485	0.383876	0.465227	0.665745	0.767924	0.612213	0.681141	0.432265	0.835382	0.77877	0.665703	0.650386	0.408487	0.606253
GSM387869	0.343889	0.664745	0.691714	0.695122	0.6947	0.610626	0.295765	0.706257	0.412123	0.744522	0.73329	0.349651	0.391712	0.560827	0.709893	0.518048	0.631965	0.12308	0.734412	0.579815	0.572481	0.575917	0.418313	0.56642
GSM387870	0.302365	0.693588	0.744074	0.695067	0.699487	0.661066	0.33932	0.706039	0.355419	0.769021	0.777505	0.365565	0.427803	0.55915	0.74616	0.56299	0.643371	0.243796	0.757298	0.559011	0.570647	0.616988	0.434227	0.628919
GSM387871	0.315459	0.729314	0.700773	0.692194	0.701117	0.635524	0.332118	0.692207	0.384779	0.728982	0.681053	0.377323	0.398038	0.447765	0.726087	0.510677	0.578359	0.215011	0.721502	0.499618	0.543892	0.560303	0.408968	0.594804
GSM387872	0.26713	0.6747	0.655777	0.674444	0.702749	0.686569	0.355808	0.767201	0.334533	0.72497	0.713121	0.279877	0.455528	0.569889	0.733546	0.537866	0.593908	0.322181	0.742108	0.600467	0.592061	0.554498	0.418861	0.568641
GSM387873	0.576622	0.757205	0.703014	0.728272	0.676244	0.616295	0.313773	0.66299	0.469267	0.714449	0.761348	0.607213	0.366055	0.504264	0.683081	0.521505	0.633793	0.262415	0.739129	0.515045	0.570991	0.618268	0.432959	0.50477
GSM387874	0.222364	0.664825	0.60856	0.72623	0.71098	0.666712	0.38674	0.704193	0.412548	0.771758	0.787159	0.523305	0.491539	0.59483	0.715557	0.593444	0.658684	0.215626	0.754167	0.640703	0.614327	0.61252	0.438197	0.564005
GSM387875	0.233746	0.644137	0.67789	0.670819	0.662327	0.58719	0.336955	0.73176	0.320615	0.76308	0.757441	0.338161	0.392278	0.648797	0.69641	0.558838	0.606244	0.130811	0.758665	0.615619	0.590336	0.570338	0.357714	0.560404
GSM387876	0.446129	0.669243	0.819353	0.696616	0.694964	0.632362	0.423138	0.705929	0.458915	0.772987	0.834382	0.383081	0.392061	0.647788	0.749737	0.553665	0.650116	0.0542021	0.769417	0.632826	0.653666	0.650593	0.404877	0.570474
GSM387877	0.463916	0.851644	0.91211	0.731582	0.733653	0.663626	0.362165	0.762073	0.524308	0.796302	0.91746	0.492081	0.32702	0.596881	0.754198	0.566983	0.658612	0.307791	0.754725	0.698897	0.687035	0.669782	0.45357	0.620105
GSM387878	0.239772	0.553694	0.53388	0.683604	0.710834	0.637495	0.347563	0.665136	0.372956	0.772467	0.690515	0.330409	0.504359	0.635461	0.714018	0.526376	0.612283	0.241878	0.749353	0.534949	0.52719	0.557158	0.39487	0.576253
GSM387879	0.433612	0.650172	0.702127	0.680778	0.728021	0.65728	0.422864	0.680671	0.358371	0.779189	0.69886	0.497091	0.42799	0.458896	0.744264	0.511444	0.571613	0.18724	0.710339	0.474583	0.539553	0.580039	0.421221	0.56898
GSM387880	0.340513	0.565413	0.706886	0.663691	0.702508	0.593236	0.365768	0.680599	0.385375	0.767233	0.774354	0.323577	0.388262	0.603696	0.717692	0.531398	0.622858	0.177022	0.778622	0.580842	0.585309	0.603029	0.408386	0.572302
GSM387881	0.215009	0.577477	0.564593	0.628694	0.632704	0.643608	0.358452	0.694332	0.363244	0.742188	0.65767	0.371223	0.291589	0.514658	0.728707	0.496039	0.636464	0.230803	0.752717	0.522444	0.541541	0.555213	0.387864	0.571859
GSM387882	0.412849	0.717312	0.645659	0.701739	0.725439	0.717175	0.340921	0.689739	0.36474	0.742952	0.722547	0.282865	0.468238	0.477964	0.745002	0.597377	0.613666	0.283207	0.717546	0.560105	0.564501	0.590303	0.405707	0.60722
GSM387883	0.540618	0.72018	0.70191	0.71091	0.729452	0.702146	0.406653	0.729163	0.433192	0.746213	0.74247	0.436434	0.245911	0.473015	0.761301	0.529013	0.617145	0.217876	0.721405	0.622541	0.605552	0.595907	0.471268	0.578366
GSM387884	0.334219	0.665194	0.680049	0.716196	0.713585	0.655685	0.442701	0.74739	0.434914	0.779199	0.711753	0.460428	0.435143	0.462711	0.732852	0.505309	0.587158	0.344595	0.747449	0.54728	0.572012	0.584098	0.439716	0.559458
GSM387885	0.820384	0.770311	0.792245	0.74089	0.734486	0.652392	0.382489	0.708906	0.663603	0.772282	0.800955	0.419882	0.517867	0.416672	0.798618	0.538627	0.60097	0.28963	0.731012	0.561989	0.584854	0.646988	0.421373	0.571244
GSM387886	0.421545	0.734936	0.780763	0.742773	0.709832	0.70274	0.405147	0.755977	0.430086	0.76211	0.827242	0.48855	0.505742	0.515605	0.74768	0.567033	0.63314	0.348938	0.767661	0.635915	0.601045	0.622377	0.466569	0.607303
GSM387887	0.580961	0.725274	0.823948	0.711459	0.730219	0.672677	0.492099	0.718035	0.582041	0.775061	0.856511	0.487431	0.39523	0.543173	0.764351	0.561482	0.63196	0.188862	0.752826	0.624255	0.600898	0.620874	0.452971	0.615618
GSM387888	0.235242	0.497172	0.527306	0.642838	0.650546	0.647915	0.391487	0.661866	0.280522	0.740445	0.635535	0.354774	0.363151	0.532236	0.712309	0.549233	0.610195	0.171727	0.732284	0.514137	0.563352	0.571944	0.443431	0.541585
GSM387889	0.519911	0.717398	0.676165	0.709555	0.746406	0.692143	0.409183	0.701503	0.49256	0.771367	0.735454	0.51414	0.440861	0.584117	0.763363	0.576492	0.609486	0.277242	0.775336	0.581045	0.572573	0.61753	0.431912	0.623131
GSM387890	0.473027	0.768525	0.68017	0.684082	0.656226	0.675413	0.339693	0.660374	0.462499	0.736193	0.607868	0.495694	0.474375	0.373176	0.752064	0.537001	0.532848	0.119949	0.703439	0.475354	0.540979	0.538304	0.437227	0.578945
GSM387891	0.500866	0.712138	0.775122	0.666242	0.756271	0.662508	0.416804	0.685301	0.478264	0.729653	0.780485	0.420438	0.330513	0.557323	0.753544	0.498224	0.596814	0.066098	0.716931	0.562498	0.567702	0.607569	0.446787	0.556932
GSM387892	0.212459	0.61568	0.558186	0.709745	0.702516	0.679915	0.301164	0.708202	0.334754	0.743411	0.602809	0.469681	0.402343	0.484421	0.694346	0.540471	0.62421	0.0992707	0.744413	0.509677	0.582077	0.564714	0.473346	0.581665
GSM387893	0.496797	0.538731	0.640341	0.724949	0.734289	0.674887	0.394672	0.721095	0.446029	0.779301	0.746665	0.391695	0.481027	0.595652	0.730202	0.524179	0.575947	0.281065	0.78271	0.590327	0.58894	0.588999	0.430881	0.538965
GSM387894	0.20209	0.699928	0.612047	0.73737	0.699483	0.674915	0.300595	0.744544	0.392718	0.766548	0.730426	0.510747	0.325406	0.455209	0.75701	0.532305	0.56799	0.306552	0.719378	0.530697	0.526423	0.566073	0.480632	0.573811
GSM387895	0.433421	0.731468	0.786204	0.743541	0.724265	0.636832	0.396721	0.717724	0.458194	0.761513	0.799124	0.362773	0.418387	0.552273	0.748779	0.536933	0.603126	0.280743	0.730755	0.597899	0.562596	0.6119	0.457137	0.595954
GSM387896	0.147806	0.669662	0.545445	0.700415	0.671598	0.66804	0.261056	0.71981	0.331006	0.743251	0.713156	0.437791	0.33361	0.532765	0.758446	0.540484	0.6047	0.203366	0.740635	0.562061	0.575634	0.571427	0.466964	0.638625
GSM387897	0.523613	0.69951	0.77855	0.708915	0.712584	0.643273	0.32461	0.693133	0.499079	0.755405	0.755587	0.349867	0.399451	0.468485	0.741678	0.51693	0.592563	0.117904	0.73566	0.573155	0.577879	0.597766	0.428593	0.593143
GSM387898	0.417977	0.575733	0.701163	0.666404	0.636584	0.586321	0.300191	0.641314	0.378453	0.748748	0.728304	0.267234	0.20167	0.594062	0.715921	0.544237	0.614666	0.0405986	0.752291	0.585983	0.576199	0.613412	0.39545	0.562517
GSM387899	0.341354	0.569795	0.655419	0.674439	0.697039	0.6149	0.315803	0.698182	0.43037	0.77613	0.653146	0.281364	0.370373	0.556865	0.746266	0.544565	0.610043	0.1279	0.78262	0.547034	0.579298	0.612042	0.41693	0.544102
GSM387900	0.514294	0.674233	0.75237	0.65162	0.718146	0.658693	0.453491	0.70804	0.434876	0.737209	0.704287	0.35581	0.353539	0.479402	0.75173	0.497471	0.563945	0.289273	0.728581	0.517006	0.564045	0.582078	0.408147	0.605858
GSM387901	0.09289	0.669288	0.57174	0.640087	0.681809	0.672021	0.308569	0.682745	0.252692	0.685682	0.522007	0.405503	0.312987	0.520595	0.668015	0.482781	0.560617	0.15062	0.707804	0.441493	0.491019	0.503757	0.41645	0.598574
GSM387902	0.780394	0.663614	0.818256	0.698977	0.716271	0.668857	0.412927	0.683945	0.609203	0.740109	0.768494	0.423035	0.270625	0.441385	0.788131	0.509104	0.591906	0.182073	0.766913	0.61419	0.599892	0.621509	0.477816	0.523318
GSM387903	0.0507585	0.628733	0.559153	0.577805	0.670667	0.63988	0.267546	0.690755	0.274936	0.68018	0.462402	0.399408	0.291309	0.371654	0.737424	0.479887	0.528093	0.252525	0.657008	0.40594	0.520548	0.476024	0.413096	0.579425
GSM387904	0.200083	0.672396	0.578627	0.662965	0.774381	0.613708	0.332322	0.690347	0.309929	0.710112	0.66452	0.698189	0.34518	0.41926	0.78193	0.51439	0.579641	0.301078	0.716053	0.497022	0.54596	0.509356	0.427905	0.593922
GSM387905	0.300238	0.722518	0.795114	0.729505	0.697542	0.628064	0.314532	0.759851	0.4401	0.804868	0.871722	0.401482	0.37488	0.634889	0.760323	0.599909	0.670123	0.244624	0.780469	0.663131	0.664129	0.642906	0.398105	0.623881
GSM387906	0.246997	0.623324	0.667032	0.695782	0.742615	0.647746	0.327597	0.702833	0.353006	0.7769	0.720176	0.422752	0.37027	0.534959	0.736731	0.550729	0.616923	0.256529	0.737201	0.566227	0.574152	0.606194	0.42849	0.61094
GSM387907	0.227869	0.57959	0.587058	0.720324	0.679761	0.674613	0.288068	0.709542	0.354264	0.75821	0.70877	0.528047	0.4266	0.441743	0.77909	0.575525	0.5731	0.231376	0.742851	0.553243	0.546846	0.517408	0.451215	0.484978
GSM387908	0.216577	0.676129	0.604788	0.715182	0.677084	0.677245	0.370459	0.745284	0.375163	0.737231	0.761929	0.488094	0.376787	0.555479	0.711387	0.555902	0.591825	0.221048	0.704298	0.637193	0.592445	0.580181	0.471141	0.528776
GSM387909	0.292283	0.588936	0.681036	0.637604	0.662709	0.644467	0.415075	0.675553	0.355132	0.694367	0.662286	0.331853	0.326486	0.530987	0.740197	0.514402	0.622386	0.183645	0.766323	0.572493	0.60064	0.554856	0.397575	0.519368
GSM387910	0.289648	0.649874	0.686486	0.66327	0.701267	0.655693	0.311965	0.698169	0.312573	0.748843	0.633661	0.383308	0.407199	0.474797	0.718169	0.538459	0.59777	0.275343	0.723428	0.514166	0.566338	0.565819	0.437376	0.599205
GSM387911	0.567067	0.75383	0.839335	0.701117	0.713511	0.65962	0.422973	0.751617	0.522638	0.762948	0.835916	0.436208	0.334322	0.553074	0.78512	0.57362	0.635426	0.232882	0.754773	0.676734	0.654463	0.63948	0.439363	0.596903
GSM387912	0.373107	0.655885	0.631247	0.685032	0.709208	0.674603	0.441611	0.741717	0.34085	0.738612	0.727141	0.37717	0.366331	0.548103	0.752742	0.543547	0.585924	0.378068	0.756538	0.543788	0.564811	0.605528	0.441193	0.596297
GSM387913	0.307298	0.718262	0.643469	0.674881	0.643573	0.671356	0.362888	0.659103	0.354544	0.746091	0.646144	0.399403	0.249184	0.513413	0.685155	0.521123	0.542468	0.231679	0.685085	0.48466	0.515175	0.536134	0.431985	0.560879
GSM387914	0.179484	0.674718	0.557485	0.739531	0.704688	0.634105	0.273709	0.774494	0.354549	0.800861	0.778269	0.48747	0.417219	0.462789	0.751086	0.56729	0.625454	0.242652	0.772015	0.693211	0.614737	0.59752	0.429268	0.568557
GSM387915	0.484644	0.728382	0.780748	0.719968	0.710117	0.657848	0.420416	0.726003	0.478203	0.76409	0.824054	0.506291	0.388483	0.579976	0.742296	0.588465	0.631795	0.197985	0.754388	0.627569	0.588255	0.608419	0.450575	0.609822
GSM387916	0.467321	0.614769	0.637031	0.60653	0.655711	0.658476	0.411637	0.664266	0.384568	0.65266	0.566257	0.465713	0.390244	0.374656	0.730435	0.486607	0.539069	0.227399	0.727514	0.434317	0.533336	0.534447	0.444567	0.480204
GSM387917	0.222376	0.663031	0.607255	0.724257	0.711591	0.648763	0.359793	0.662155	0.362158	0.748399	0.677936	0.454775	0.242487	0.532757	0.731574	0.497261	0.546933	0.296936	0.712894	0.463726	0.532284	0.560301	0.511731	0.58576
GSM387918	0.339675	0.671464	0.603196	0.657217	0.706261	0.689391	0.451584	0.696132	0.35137	0.780073	0.647769	0.41405	0.444089	0.497542	0.741042	0.502282	0.591781	0.328221	0.753473	0.479474	0.537466	0.59271	0.446447	0.600363
GSM387919	0.353474	0.674878	0.689096	0.749662	0.712426	0.652627	0.365712	0.719892	0.484618	0.802667	0.879446	0.372195	0.465309	0.615036	0.751802	0.584253	0.667631	0.328744	0.778424	0.687421	0.636024	0.6274	0.425093	0.580211
GSM387920	0.288336	0.700504	0.641545	0.635602	0.684572	0.680521	0.355637	0.686762	0.350015	0.720102	0.640652	0.401954	0.237997	0.431502	0.699021	0.517838	0.539584	0.266209	0.717634	0.497263	0.557005	0.546911	0.392197	0.608064
GSM387921	0.519708	0.789951	0.745122	0.700903	0.735539	0.675115	0.389055	0.720838	0.469874	0.747596	0.771471	0.433649	0.413788	0.544471	0.728347	0.565088	0.586679	0.214487	0.715713	0.566703	0.602573	0.596523	0.425975	0.590575
GSM387922	0.275255	0.782976	0.752395	0.670916	0.685712	0.660327	0.356183	0.718937	0.276064	0.705657	0.66912	0.548956	0.453839	0.444192	0.700284	0.562921	0.617037	0.182176	0.690145	0.569959	0.570942	0.573034	0.414526	0.570831
GSM387923	0.143159	0.570194	0.610234	0.664523	0.691919	0.63292	0.270132	0.743134	0.283949	0.736687	0.660635	0.29093	0.285368	0.443271	0.798789	0.54678	0.630148	0.325685	0.748857	0.586558	0.583598	0.568814	0.441136	0.531961
GSM387924	0.492523	0.725517	0.764291	0.689642	0.711535	0.666347	0.325915	0.685881	0.452255	0.754338	0.689667	0.439145	0.362353	0.454687	0.733983	0.521086	0.588744	0.204207	0.755225	0.521635	0.546817	0.601175	0.437594	0.612488
GSM387925	0.514582	0.687661	0.758402	0.702144	0.724599	0.645621	0.44389	0.706216	0.474756	0.740693	0.788772	0.339718	0.364042	0.575717	0.758193	0.530898	0.617677	0.184628	0.754389	0.572827	0.607747	0.630973	0.426187	0.599351
GSM387926	0.225995	0.696501	0.636967	0.693855	0.715517	0.677365	0.299034	0.734752	0.353454	0.755893	0.615888	0.43029	0.268992	0.465953	0.717927	0.54155	0.576059	0.297002	0.750838	0.483281	0.591566	0.566044	0.452301	0.604068
GSM387927	0.337927	0.77259	0.81186	0.750261	0.700917	0.655624	0.327629	0.718248	0.448369	0.714306	0.810247	0.633749	0.483985	0.60383	0.719207	0.590203	0.629979	0.222601	0.734424	0.645502	0.6129	0.618373	0.436544	0.58089
GSM387928	0.500228	0.829309	0.873074	0.753743	0.729875	0.660917	0.412727	0.774946	0.578751	0.760716	0.854859	0.562468	0.425693	0.472116	0.758389	0.562004	0.658928	0.34058	0.802926	0.669972	0.622085	0.642821	0.435976	0.622041
GSM387929	0.323503	0.606976	0.624668	0.667865	0.656979	0.625411	0.38044	0.688842	0.344804	0.769412	0.780327	0.462073	0.412598	0.565217	0.700773	0.555185	0.653049	0.235585	0.771943	0.618329	0.591644	0.581667	0.36876	0.547822
GSM387930	0.411786	0.80946	0.802569	0.726072	0.715723	0.695639	0.346959	0.731469	0.474859	0.7444	0.786906	0.635609	0.420194	0.480283	0.738074	0.551071	0.608212	0.325219	0.720815	0.617249	0.592134	0.606827	0.467641	0.62735
GSM387931	0.499152	0.61736	0.670953	0.737452	0.691631	0.611792	0.454932	0.782482	0.436204	0.763905	0.832988	0.404573	0.523028	0.674834	0.783167	0.590602	0.634419	0.2302	0.815356	0.663073	0.62378	0.624379	0.3626	0.607907
GSM387932	0.381808	0.738723	0.628794	0.646998	0.703144	0.662262	0.309373	0.690343	0.274018	0.764512	0.651391	0.141957	0.380165	0.407847	0.714136	0.476155	0.535252	0.117232	0.700089	0.479371	0.482641	0.519686	0.379249	0.55043
GSM387933	0.418321	0.66797	0.740895	0.678356	0.700415	0.661695	0.361771	0.755978	0.36174	0.760036	0.780583	0.38539	0.367368	0.537619	0.728563	0.519009	0.594082	0.292741	0.736526	0.612007	0.599258	0.607204	0.423149	0.588323
GSM387934	0.519528	0.748367	0.798905	0.754247	0.706802	0.680468	0.421863	0.758367	0.528251	0.78306	0.857675	0.526366	0.458164	0.542296	0.796337	0.564364	0.632657	0.424567	0.75566	0.650602	0.641087	0.617331	0.47244	0.615256
GSM387935	0.423048	0.671659	0.683002	0.700186	0.70961	0.707334	0.459481	0.707542	0.414022	0.773128	0.753311	0.356814	0.389155	0.549415	0.730807	0.525585	0.583227	0.31579	0.747596	0.513259	0.549966	0.581099	0.434106	0.605244
GSM387936	0.32607	0.55661	0.689113	0.715308	0.734412	0.62485	0.472939	0.774997	0.429621	0.770134	0.79582	0.349055	0.492945	0.688352	0.745986	0.608535	0.640995	0.267432	0.816074	0.629899	0.649847	0.625667	0.333213	0.598049
GSM387938	0.229292	0.611554	0.704708	0.695268	0.73372	0.663634	0.345095	0.692096	0.313589	0.751678	0.672334	0.425431	0.396854	0.476161	0.73603	0.509561	0.576252	0.278994	0.711964	0.507517	0.538326	0.560889	0.426435	0.546493
GSM387939	0.586835	0.700359	0.702498	0.680254	0.730685	0.6981	0.438167	0.677102	0.470843	0.740866	0.691377	0.475321	0.380075	0.466981	0.746445	0.504441	0.558052	0.201913	0.719038	0.481331	0.560009	0.578276	0.441813	0.578996
GSM387940	0.484825	0.668065	0.75862	0.70096	0.724048	0.689743	0.469631	0.69845	0.498767	0.746959	0.820564	0.319914	0.466637	0.598685	0.734274	0.551922	0.628155	0.139654	0.735425	0.604788	0.600328	0.634783	0.397863	0.579211
GSM387941	0.274964	0.753172	0.684001	0.74485	0.745387	0.748204	0.318445	0.78881	0.417237	0.798147	0.824786	0.635721	0.380303	0.548876	0.736002	0.592826	0.607909	0.450742	0.782016	0.714073	0.6291	0.595175	0.433544	0.544554
GSM387942	0.125297	0.669696	0.587537	0.654034	0.621667	0.631397	0.304934	0.665535	0.340012	0.7292	0.630549	0.306505	0.429282	0.430604	0.691402	0.523858	0.61201	0.187848	0.706558	0.491541	0.543082	0.564378	0.385253	0.60462
GSM387943	0.381393	0.639927	0.660941	0.632901	0.644017	0.57728	0.348162	0.677786	0.447209	0.708578	0.667737	0.296685	0.356696	0.54612	0.701784	0.54803	0.600569	0.0176092	0.731144	0.52061	0.541546	0.545421	0.387669	0.58419
GSM387944	0.578957	0.745343	0.734321	0.692343	0.680559	0.672811	0.328094	0.666659	0.442236	0.727896	0.707567	0.476756	0.360245	0.433432	0.756794	0.551635	0.567528	0.233503	0.698426	0.485182	0.541872	0.562314	0.459051	0.570267
GSM387945	0.233413	0.717436	0.643281	0.688299	0.686327	0.662547	0.339766	0.749541	0.316066	0.771023	0.714096	0.408902	0.431234	0.505566	0.751092	0.56363	0.627762	0.352722	0.773386	0.628276	0.612264	0.572517	0.401198	0.590872
GSM387946	0.75368	0.789691	0.854939	0.723787	0.714535	0.680154	0.390095	0.700086	0.600909	0.758548	0.839932	0.542096	0.40917	0.548365	0.774235	0.577132	0.634902	0.247566	0.753138	0.663091	0.628885	0.648769	0.42695	0.596227
GSM387947	0.512386	0.763702	0.787757	0.749037	0.734655	0.671771	0.444039	0.721782	0.464999	0.761029	0.817755	0.33625	0.384254	0.673433	0.75773	0.59023	0.652252	0.259457	0.798026	0.60633	0.62033	0.628331	0.373549	0.623953
GSM387948	0.406098	0.72288	0.745293	0.706478	0.711493	0.696778	0.337472	0.736961	0.364677	0.722533	0.754186	0.40303	0.380217	0.548022	0.719238	0.551706	0.605458	0.193543	0.718241	0.519922	0.546736	0.583173	0.450325	0.635932
GSM387949	0.295023	0.683465	0.66041	0.670386	0.71725	0.649277	0.398121	0.727686	0.370992	0.733859	0.654451	0.52558	0.357637	0.463582	0.715406	0.512779	0.534535	0.392595	0.704926	0.504661	0.541979	0.52227	0.440472	0.546685
GSM387950	0.688502	0.726101	0.845552	0.717751	0.691071	0.60632	0.40522	0.672329	0.578239	0.709554	0.768917	0.355158	0.25945	0.454988	0.776859	0.545752	0.651823	0.0960935	0.759681	0.646365	0.606278	0.619824	0.384718	0.618839
GSM387951	0.342387	0.649015	0.670472	0.693884	0.700772	0.695312	0.271579	0.723107	0.429808	0.692579	0.565521	0.524322	0.405663	0.367516	0.729829	0.496492	0.561005	0.407968	0.729102	0.400876	0.510553	0.569661	0.463696	0.564982
GSM387952	0.241822	0.729232	0.751755	0.717503	0.671503	0.714803	0.209562	0.664757	0.40073	0.693796	0.624145	0.356249	0.424301	0.452217	0.752039	0.539163	0.609234	0.294022	0.687307	0.534529	0.524312	0.570345	0.454067	0.574521
GSM387953	0.544475	0.744592	0.842144	0.754752	0.693417	0.670967	0.39837	0.690469	0.57589	0.757564	0.905194	0.560448	0.450179	0.575734	0.779869	0.55304	0.631172	0.294002	0.767654	0.698584	0.624924	0.62836	0.510474	0.619491
GSM387954	0.203133	0.653867	0.698291	0.697535	0.709422	0.634969	0.295953	0.705171	0.343019	0.753298	0.735767	0.359	0.432347	0.553862	0.730434	0.558495	0.626779	0.140792	0.740425	0.571004	0.591232	0.581908	0.465496	0.561992
GSM387955	0.183529	0.649988	0.601124	0.677309	0.68926	0.673863	0.257713	0.676111	0.331221	0.730013	0.605521	0.474597	0.350825	0.450821	0.741387	0.539654	0.588061	0.249334	0.74192	0.553545	0.555147	0.561099	0.419999	0.602405
GSM387956	0.312753	0.652664	0.572472	0.713312	0.690409	0.67505	0.369436	0.676553	0.400351	0.779684	0.68315	0.367785	0.383616	0.482472	0.733072	0.525432	0.597385	0.188007	0.764095	0.488177	0.564053	0.560276	0.417747	0.551958
GSM387957	0.210274	0.638263	0.629281	0.734933	0.666389	0.648488	0.168729	0.657934	0.339699	0.76532	0.701899	0.568941	0.37713	0.596632	0.710268	0.53589	0.586574	0.16121	0.729049	0.579573	0.548109	0.557074	0.423829	0.575027
GSM387958	0.165245	0.577319	0.513516	0.644835	0.649542	0.637467	0.312535	0.709196	0.26895	0.655708	0.403742	0.454156	0.25246	0.301499	0.714651	0.379481	0.551444	0.242606	0.68581	0.449655	0.477901	0.427708	0.341932	0.560966
GSM387959	0.433522	0.8538	0.903102	0.742273	0.697804	0.640261	0.4037	0.788308	0.509956	0.766685	0.927781	0.540135	0.50193	0.590255	0.744985	0.605003	0.682535	0.227751	0.784334	0.749449	0.665946	0.654205	0.435847	0.636649
GSM387960	0.233648	0.414487	0.511145	0.613291	0.662053	0.59954	0.389047	0.711678	0.372411	0.752978	0.579448	0.235283	0.469469	0.655807	0.723632	0.556222	0.624985	0.122595	0.761837	0.563129	0.54961	0.572189	0.319098	0.546174
GSM387961	0.563225	0.723526	0.790113	0.713676	0.708129	0.620027	0.320792	0.728064	0.465729	0.750709	0.816417	0.582039	0.423398	0.606968	0.749721	0.572607	0.627157	0.234211	0.769558	0.600886	0.615789	0.613774	0.464775	0.602842
GSM387962	0.433584	0.679501	0.731263	0.705828	0.728178	0.691358	0.353184	0.712257	0.48109	0.774315	0.746344	0.383279	0.403108	0.557992	0.729676	0.565277	0.649689	0.233156	0.76145	0.608085	0.609747	0.615407	0.46525	0.597623
GSM387963	0.454909	0.767171	0.782608	0.745842	0.722835	0.678546	0.327234	0.721807	0.498417	0.755036	0.757984	0.441138	0.297837	0.476882	0.747736	0.53709	0.638061	0.228121	0.735213	0.601327	0.601551	0.61599	0.449435	0.646545
GSM387964	0.3185	0.750823	0.763906	0.706326	0.680696	0.706123	0.284259	0.738457	0.467816	0.752377	0.692988	0.53044	0.471412	0.410855	0.729802	0.543128	0.6017	0.223462	0.736161	0.634584	0.588629	0.592946	0.458901	0.570071
GSM387965	0.295951	0.721094	0.672264	0.728002	0.745165	0.688651	0.350697	0.714266	0.45775	0.781218	0.799312	0.525199	0.406816	0.58112	0.765365	0.531133	0.636984	0.187643	0.756641	0.616036	0.615891	0.610979	0.482285	0.582224
GSM387966	0.141522	0.635242	0.534666	0.64977	0.683905	0.641277	0.33357	0.652459	0.241408	0.677874	0.541282	0.501898	0.430661	0.463198	0.704069	0.462602	0.491128	0.21764	0.65937	0.420751	0.500324	0.489601	0.446383	0.560756
GSM387967	0.571249	0.693347	0.731673	0.705796	0.675045	0.663725	0.410267	0.750259	0.486879	0.780972	0.806711	0.402068	0.453732	0.557958	0.726226	0.562015	0.599511	0.216314	0.812268	0.592293	0.565619	0.621996	0.422964	0.581781
GSM387968	0.23127	0.664249	0.611393	0.678254	0.705954	0.685169	0.35811	0.748253	0.342528	0.760216	0.663025	0.474445	0.218293	0.426913	0.712035	0.535693	0.60864	0.332111	0.730871	0.52435	0.545261	0.551304	0.492037	0.528028
GSM387969	0.903688	0.862831	0.942796	0.770442	0.724221	0.667598	0.47094	0.748749	0.776959	0.76433	0.932661	0.593636	0.550469	0.521558	0.817965	0.581563	0.653536	0.102641	0.801596	0.70507	0.71242	0.670978	0.466908	0.571848
GSM387970	0.119226	0.658026	0.538688	0.768517	0.694538	0.714257	0.280639	0.75369	0.34636	0.822362	0.765611	0.648956	0.287736	0.550541	0.740658	0.578215	0.650943	0.510902	0.823007	0.605376	0.587881	0.584976	0.466862	0.555604
GSM387971	0.190423	0.650793	0.667735	0.757845	0.706994	0.677215	0.345584	0.692378	0.399047	0.75175	0.731837	0.627098	0.524176	0.44703	0.747461	0.533428	0.615069	0.228628	0.765467	0.61476	0.625846	0.57353	0.480502	0.596838
GSM387972	0.454646	0.683862	0.635415	0.721834	0.655066	0.661992	0.256966	0.701492	0.380034	0.803528	0.776203	0.685655	0.295639	0.458315	0.751877	0.553534	0.629746	0.320552	0.733013	0.559862	0.596579	0.54906	0.443676	0.568003
GSM387973	0.242286	0.724454	0.686278	0.723959	0.683519	0.668066	0.360023	0.704241	0.387354	0.742874	0.718005	0.431677	0.247827	0.538977	0.735385	0.548545	0.617236	0.220197	0.74415	0.549232	0.557448	0.591554	0.441282	0.647358
GSM387974	0.475108	0.837421	0.879737	0.757198	0.680501	0.6765	0.263196	0.723637	0.545272	0.76622	0.84985	0.711411	0.394259	0.452527	0.792711	0.577611	0.683788	0.248923	0.742494	0.635196	0.639948	0.651333	0.465724	0.576803
GSM387975	0.285256	0.685171	0.749282	0.73282	0.688379	0.68509	0.269568	0.713769	0.459156	0.750195	0.738712	0.606056	0.412789	0.488869	0.753929	0.58719	0.656064	0.271843	0.740498	0.61548	0.611293	0.585731	0.44525	0.539047
GSM387976	0.215847	0.691067	0.70384	0.655347	0.709731	0.651569	0.29477	0.715255	0.316705	0.722387	0.711476	0.35538	0.37314	0.469541	0.742013	0.521092	0.627928	0.264338	0.719638	0.572857	0.597524	0.549177	0.388064	0.571015
GSM387977	0.593757	0.725205	0.752152	0.702143	0.706373	0.676284	0.41664	0.73535	0.553474	0.743754	0.737223	0.413775	0.406028	0.507269	0.758313	0.551163	0.590647	0.361161	0.740577	0.578745	0.594173	0.601462	0.43437	0.608404
GSM387978	0.289614	0.541441	0.685416	0.63176	0.641652	0.578736	0.257698	0.653141	0.400685	0.767432	0.700347	0.29653	0.370751	0.559956	0.699467	0.535029	0.629832	0.0613475	0.736379	0.546341	0.567339	0.571228	0.404553	0.549962
GSM387979	0.223166	0.637453	0.635064	0.640436	0.687337	0.658555	0.283322	0.675697	0.313051	0.74954	0.57432	0.338305	0.405	0.42702	0.693254	0.528702	0.599069	0.23933	0.727669	0.462448	0.554775	0.570785	0.405254	0.578377
GSM387980	0.158564	0.640773	0.605023	0.694	0.685045	0.653151	0.24618	0.679603	0.306974	0.757173	0.609803	0.466173	0.417413	0.454286	0.682727	0.544908	0.601917	0.126479	0.699411	0.508831	0.520068	0.553867	0.448602	0.628007
GSM387981	0.130083	0.674222	0.554069	0.688622	0.701501	0.64531	0.259172	0.715049	0.271186	0.780099	0.614787	0.498626	0.313996	0.498608	0.708599	0.526407	0.583159	0.286378	0.747262	0.556839	0.579175	0.542807	0.42378	0.604075
GSM387982	0.489619	0.602407	0.762491	0.691682	0.696974	0.670172	0.434928	0.642449	0.432252	0.736203	0.640572	0.296925	0.412153	0.39677	0.714029	0.463592	0.573004	0.115979	0.729863	0.499874	0.539037	0.574424	0.427656	0.575263
GSM387983	0.316854	0.644036	0.71772	0.706639	0.671986	0.675086	0.340028	0.693848	0.376825	0.751454	0.755982	0.546082	0.383904	0.576723	0.722952	0.565159	0.64809	0.206124	0.74923	0.570004	0.596105	0.593496	0.456879	0.539834
GSM387984	0.129481	0.716371	0.685293	0.708387	0.664058	0.671667	0.25283	0.696237	0.213277	0.733532	0.655866	0.4923	0.439221	0.482264	0.735867	0.568852	0.57875	0.272504	0.67227	0.480888	0.496029	0.557885	0.451813	0.48828
GSM387985	0.187185	0.621603	0.607365	0.692993	0.695001	0.718804	0.268144	0.70371	0.262101	0.733203	0.691562	0.452279	0.415926	0.506798	0.745257	0.544015	0.543699	0.284172	0.71812	0.510323	0.530564	0.562984	0.41526	0.547898
GSM387986	0.300479	0.671924	0.524827	0.640371	0.636925	0.712591	0.377804	0.685929	0.230944	0.714862	0.602161	0.35853	0.251005	0.368698	0.743077	0.450971	0.52866	0.238548	0.692599	0.493826	0.545642	0.484262	0.377868	0.521558
GSM387987	0.187196	0.610636	0.548621	0.625325	0.657753	0.679878	0.199353	0.719288	0.295546	0.74536	0.586739	0.399337	0.432739	0.331572	0.732904	0.501443	0.572278	0.208779	0.706679	0.482504	0.548825	0.475314	0.346866	0.458039
GSM858082	0.527441	0.818778	0.877668	0.755523	0.734245	0.682867	0.420302	0.755518	0.531545	0.766743	0.870089	0.53003	0.464814	0.573648	0.753439	0.58868	0.675641	0.157527	0.741374	0.664185	0.646307	0.631105	0.445289	0.616734
GSM858083	0.256308	0.813367	0.769956	0.819251	0.679917	0.682551	0.359296	0.725807	0.473469	0.74209	0.771837	0.86895	0.364004	0.502418	0.742353	0.562727	0.614037	0.337566	0.744059	0.617923	0.568853	0.603393	0.516133	0.592253
GSM858084	0.334497	0.706284	0.631835	0.720172	0.759819	0.671941	0.443609	0.767883	0.40672	0.78197	0.73559	0.514403	0.350639	0.559881	0.741765	0.565866	0.599328	0.293321	0.733799	0.585739	0.581294	0.598764	0.448766	0.651702
GSM858085	0.276242	0.738976	0.716903	0.669224	0.742097	0.656157	0.324973	0.701377	0.3133	0.695882	0.720041	0.406588	0.324373	0.422199	0.689086	0.557211	0.589674	0.156251	0.738246	0.570145	0.569688	0.550363	0.402617	0.582206
GSM858086	0.192066	0.63818	0.557893	0.693917	0.667214	0.695701	0.208165	0.739883	0.361698	0.742358	0.65147	0.364717	0.516872	0.48617	0.728281	0.547774	0.618244	0.154074	0.699103	0.576574	0.557947	0.560123	0.447145	0.521405
GSM858087	0.365237	0.659262	0.702802	0.710953	0.720617	0.679553	0.403548	0.71523	0.365961	0.788246	0.768612	0.438455	0.490213	0.581373	0.723478	0.554204	0.633959	0.176653	0.763248	0.598055	0.645825	0.626823	0.41745	0.57736
GSM858088	0.474866	0.754196	0.776533	0.722016	0.724446	0.675638	0.386306	0.734312	0.491732	0.78323	0.755766	0.536946	0.327989	0.472639	0.730723	0.535415	0.623612	0.240361	0.754615	0.624659	0.610966	0.619594	0.45918	0.625996
GSM858089	0.229134	0.437677	0.605863	0.646912	0.643019	0.609955	0.346531	0.712317	0.324924	0.728485	0.714539	0.243586	0.349987	0.701765	0.717264	0.537523	0.629941	0.132335	0.767265	0.592781	0.54777	0.597294	0.329141	0.573621
GSM858090	0.303899	0.495486	0.630081	0.63699	0.612667	0.585748	0.322015	0.655856	0.379249	0.742681	0.675268	0.222081	0.337737	0.594644	0.71129	0.504974	0.614754	0.0730743	0.745639	0.568062	0.536055	0.560125	0.33148	0.55632
GSM858091	0.52832	0.621452	0.754091	0.754644	0.663783	0.613116	0.462594	0.750701	0.484709	0.794724	0.893424	0.324506	0.518198	0.749635	0.747181	0.596754	0.669958	0.43572	0.81001	0.659002	0.612882	0.659539	0.361125	0.568938
GSM858092	0.230212	0.731607	0.636617	0.689153	0.708153	0.677141	0.302603	0.719499	0.306904	0.781664	0.706074	0.382947	0.348745	0.477666	0.719169	0.528811	0.58104	0.287556	0.725455	0.569162	0.561922	0.571273	0.366941	0.60808
GSM858093	0.558496	0.815594	0.814667	0.724637	0.687385	0.699298	0.348757	0.675138	0.5348	0.735072	0.757091	0.475947	0.363631	0.451811	0.73344	0.51116	0.585366	0.243526	0.734507	0.539865	0.549674	0.592998	0.423547	0.603987
GSM858094	0.421674	0.733663	0.798544	0.712942	0.677012	0.659479	0.260192	0.712528	0.464604	0.729214	0.75245	0.452395	0.347522	0.513875	0.735869	0.545268	0.638099	0.12338	0.72377	0.595409	0.604818	0.586544	0.437891	0.573307
GSM858095	0.167474	0.712722	0.658023	0.694881	0.668427	0.662248	0.373272	0.713636	0.313349	0.717304	0.653884	0.4774	0.367794	0.44973	0.79734	0.500176	0.561594	0.235273	0.711674	0.532583	0.516702	0.528384	0.407716	0.579913
GSM858096	0.664588	0.615784	0.786226	0.715314	0.720054	0.633061	0.453185	0.778651	0.602898	0.768766	0.89526	0.402697	0.625406	0.747695	0.764366	0.623365	0.652985	0.186794	0.816884	0.684888	0.648565	0.657761	0.324096	0.557033
GSM858097	0.257625	0.688575	0.689764	0.678597	0.718066	0.67714	0.308291	0.762548	0.39014	0.800739	0.74967	0.481295	0.400225	0.418684	0.768105	0.535893	0.632811	0.381823	0.751714	0.659715	0.614585	0.557	0.40791	0.553276
GSM858098	0.112554	0.61376	0.515587	0.65569	0.649915	0.668322	0.223051	0.697714	0.243209	0.750082	0.57534	0.343044	0.330833	0.405554	0.681302	0.501038	0.544638	0.201409	0.728823	0.496827	0.574789	0.504483	0.339595	0.529141
GSM858099	0.17607	0.721568	0.681326	0.682968	0.729514	0.652671	0.261662	0.706853	0.355136	0.717178	0.696426	0.578174	0.278926	0.411336	0.801744	0.494266	0.594626	0.244887	0.73313	0.556665	0.556331	0.502213	0.402717	0.573144
GSM858100	0.218032	0.626844	0.609169	0.647315	0.737092	0.656739	0.364756	0.695354	0.40657	0.749188	0.751113	0.430502	0.407176	0.598558	0.733595	0.555561	0.629952	0.192929	0.766873	0.600111	0.618819	0.621427	0.438951	0.653463
GSM858101	0.179955	0.718202	0.660491	0.700066	0.728522	0.674221	0.282726	0.716175	0.355471	0.709386	0.662023	0.556964	0.559219	0.51357	0.691367	0.552077	0.618904	0.173529	0.717919	0.576552	0.573944	0.555769	0.453655	0.623275
GSM858102	0.18598	0.698971	0.635683	0.771779	0.663871	0.639243	0.268568	0.734938	0.4409	0.795759	0.737037	0.506275	0.341915	0.441564	0.729356	0.534238	0.602331	0.347989	0.726834	0.621397	0.545967	0.57246	0.433348	0.525268
GSM858103	0.181179	0.594244	0.550911	0.703338	0.668011	0.677381	0.28636	0.697555	0.311563	0.797996	0.636955	0.579794	0.357317	0.358955	0.832231	0.509791	0.597395	0.27987	0.75604	0.566588	0.582333	0.527559	0.401678	0.495551
GSM858104	0.238044	0.437749	0.590434	0.627669	0.635452	0.653244	0.384332	0.611438	0.362179	0.709948	0.653389	0.376082	0.409274	0.470873	0.714784	0.524913	0.616718	0.0788424	0.804108	0.555971	0.576155	0.562398	0.397754	0.50311
GSM858105	0.446121	0.8412	0.908183	0.731411	0.748358	0.667241	0.346451	0.730562	0.526361	0.763364	0.870358	0.628824	0.368499	0.482384	0.752311	0.560362	0.653724	0.207457	0.74265	0.663343	0.650325	0.635865	0.472671	0.661125
GSM858106	0.369809	0.759206	0.742174	0.725145	0.677095	0.624055	0.402086	0.726341	0.401024	0.762557	0.778869	0.344192	0.384455	0.634142	0.692783	0.565644	0.63515	0.184286	0.758077	0.634694	0.605372	0.60588	0.402032	0.648595
GSM858107	0.671118	0.805703	0.816387	0.781866	0.750975	0.648999	0.451953	0.774003	0.596144	0.804179	0.923097	0.5737	0.496476	0.661568	0.785646	0.606579	0.647541	0.38996	0.817756	0.677027	0.647354	0.684679	0.452486	0.652481
GSM858108	0.159543	0.65748	0.556083	0.63431	0.675854	0.671421	0.248446	0.652526	0.240873	0.664196	0.504911	0.521776	0.325062	0.413282	0.70694	0.528313	0.518581	0.183255	0.703776	0.454222	0.487091	0.530603	0.455256	0.605724
GSM858109	0.171247	0.713165	0.645074	0.736636	0.672115	0.678861	0.267505	0.742661	0.324818	0.761756	0.672605	0.601601	0.406418	0.506505	0.745318	0.523522	0.59181	0.347294	0.72967	0.609186	0.543589	0.577436	0.464069	0.587657
GSM858110	0.456143	0.5401	0.702186	0.654726	0.697432	0.645047	0.441795	0.609771	0.353145	0.711559	0.619582	0.341512	0.38656	0.463034	0.721693	0.467991	0.590356	0.0596052	0.72543	0.473673	0.5086	0.566523	0.413429	0.487952
GSM858111	0.583906	0.806875	0.807604	0.735771	0.736328	0.675269	0.324225	0.765011	0.60509	0.803395	0.889929	0.464948	0.404211	0.594973	0.764635	0.591266	0.644479	0.160354	0.771638	0.689474	0.648386	0.646885	0.426885	0.618446
GSM858112	0.244965	0.680491	0.635959	0.696454	0.681981	0.657206	0.162075	0.713941	0.349597	0.703758	0.61807	0.503886	0.249104	0.354545	0.700383	0.523371	0.596456	0.255464	0.755613	0.51077	0.529415	0.553246	0.449186	0.565008
GSM858113	0.524093	0.694862	0.708007	0.676579	0.714027	0.641722	0.484433	0.699319	0.501124	0.761114	0.709333	0.355565	0.255387	0.462461	0.739013	0.472518	0.555683	0.25397	0.720641	0.465871	0.563443	0.561519	0.433023	0.597571
GSM858114	0.730501	0.658189	0.748727	0.694005	0.703285	0.62494	0.460959	0.714721	0.642478	0.749308	0.817057	0.340423	0.331388	0.656454	0.756389	0.545847	0.619687	0.201567	0.787066	0.644053	0.607037	0.623627	0.416097	0.592452
GSM858115	0.469413	0.745014	0.704097	0.696438	0.680163	0.693314	0.319576	0.684997	0.462843	0.770839	0.695815	0.328455	0.394495	0.49106	0.720347	0.502441	0.580087	0.193625	0.691927	0.541444	0.559193	0.553858	0.443859	0.562684
GSM858116	0.210455	0.706739	0.565146	0.658773	0.701749	0.673358	0.306684	0.635511	0.33654	0.744616	0.599319	0.370641	0.382609	0.453395	0.75286	0.481267	0.569747	0.137368	0.693026	0.441652	0.524978	0.515112	0.446142	0.592087
GSM858117	0.376541	0.731326	0.734236	0.667916	0.691944	0.683034	0.388837	0.701815	0.41314	0.758239	0.721156	0.588901	0.436101	0.502939	0.7256	0.549637	0.628366	0.177907	0.733231	0.515093	0.602611	0.605142	0.468363	0.642205
GSM858118	0.414005	0.694078	0.724793	0.700313	0.698572	0.645928	0.44627	0.744786	0.458894	0.756931	0.789678	0.426907	0.414879	0.682432	0.736461	0.590499	0.63739	0.378481	0.771278	0.651034	0.627068	0.625011	0.446575	0.573291
GSM858119	0.203137	0.355555	0.46782	0.590358	0.6262	0.593668	0.389091	0.661383	0.307464	0.7178	0.53089	0.210764	0.307352	0.627131	0.672463	0.495566	0.592787	0.101378	0.751102	0.474779	0.493237	0.526935	0.339749	0.557574
GSM858120	0.247107	0.706508	0.579893	0.672093	0.703266	0.668357	0.177786	0.682298	0.310278	0.722304	0.632274	0.354251	0.298561	0.36126	0.698989	0.516533	0.560533	0.234403	0.753933	0.52667	0.561237	0.568537	0.432296	0.590258
GSM858121	0.19211	0.585661	0.593797	0.690634	0.689137	0.64615	0.449349	0.709167	0.309983	0.769979	0.749179	0.360776	0.421459	0.521424	0.698065	0.594841	0.624056	0.145132	0.777636	0.60968	0.587473	0.5711	0.436549	0.575627
GSM858122	0.327105	0.625514	0.643933	0.660672	0.684112	0.653991	0.500399	0.700928	0.410919	0.724888	0.647181	0.358887	0.358976	0.504829	0.745235	0.483056	0.552038	0.413617	0.678086	0.446353	0.537108	0.578617	0.477808	0.56965
GSM858123	0.349857	0.673638	0.620225	0.686785	0.684877	0.670088	0.329872	0.677098	0.374654	0.754688	0.636988	0.329104	0.403933	0.499792	0.709966	0.539892	0.604903	0.149033	0.711326	0.504524	0.553148	0.562676	0.447858	0.552605
GSM858124	0.13926	0.619784	0.529518	0.68797	0.65499	0.697245	0.292766	0.680266	0.342814	0.729622	0.682727	0.478039	0.366159	0.457147	0.756655	0.568037	0.587468	0.344989	0.761007	0.543224	0.563351	0.532496	0.441685	0.515425
GSM858125	0.75916	0.702402	0.821749	0.689803	0.741184	0.65547	0.512185	0.707073	0.569243	0.743224	0.821665	0.329072	0.386855	0.579241	0.766924	0.514619	0.612487	0.255482	0.738602	0.569475	0.602835	0.620625	0.436237	0.582736
GSM858126	0.315828	0.58336	0.678587	0.6837	0.695934	0.677372	0.386774	0.688127	0.364033	0.716986	0.697879	0.358065	0.349431	0.41408	0.766028	0.496712	0.560831	0.372012	0.680487	0.527614	0.546497	0.54461	0.490021	0.532391
GSM858127	0.609729	0.719313	0.756849	0.690535	0.674476	0.662459	0.425304	0.691073	0.477343	0.753191	0.733954	0.317758	0.418912	0.532661	0.736445	0.520593	0.598292	0.211411	0.731821	0.548006	0.59299	0.587945	0.451533	0.580561
GSM858128	0.289297	0.73247	0.666202	0.716709	0.716689	0.645126	0.353138	0.685402	0.340296	0.783493	0.712471	0.460107	0.408814	0.539941	0.722304	0.535595	0.569796	0.247441	0.69142	0.571667	0.550325	0.558033	0.44414	0.591736
GSM858129	0.238379	0.709274	0.657554	0.70315	0.686681	0.67795	0.30677	0.742564	0.381004	0.729516	0.759955	0.44893	0.357955	0.543959	0.730889	0.545699	0.566148	0.324606	0.747699	0.607262	0.570511	0.579084	0.40215	0.643422
GSM858130	0.195193	0.508803	0.604533	0.622957	0.595677	0.583481	0.345034	0.639485	0.330486	0.764031	0.665701	0.205237	0.356223	0.624794	0.702008	0.527099	0.586896	0.115717	0.748885	0.521265	0.543077	0.560617	0.375931	0.529527
GSM858131	0.586811	0.768387	0.839637	0.70828	0.669037	0.679347	0.303283	0.745159	0.561986	0.702527	0.787139	0.374708	0.508265	0.527148	0.733945	0.578498	0.638014	0.0942808	0.756317	0.605593	0.630911	0.613495	0.372302	0.588909
GSM858132	0.530645	0.681906	0.822434	0.722794	0.699556	0.662964	0.401686	0.725204	0.474376	0.733392	0.764117	0.371875	0.343864	0.429611	0.758629	0.498429	0.603061	0.285448	0.715191	0.57386	0.562963	0.586359	0.433888	0.555811
GSM858133	0.104763	0.567597	0.517641	0.615691	0.670058	0.682359	0.172604	0.697773	0.280426	0.754696	0.506176	0.236514	0.321914	0.391199	0.720333	0.503905	0.615588	0.193003	0.674134	0.350099	0.538445	0.506684	0.381508	0.505396
GSM858134	0.572209	0.84511	0.931652	0.800688	0.768524	0.709537	0.485412	0.816986	0.617231	0.813402	0.984614	0.47357	0.489226	0.584596	0.814409	0.640895	0.715209	0.345866	0.788675	0.774154	0.715013	0.709947	0.491	0.642235
GSM858135	0.349592	0.720023	0.753721	0.761498	0.731084	0.668928	0.425575	0.743828	0.395487	0.765648	0.842607	0.789105	0.56333	0.656972	0.733471	0.645446	0.672749	0.243145	0.780033	0.684022	0.634982	0.672633	0.506944	0.636827
GSM858136	0.392236	0.694401	0.833513	0.682665	0.729896	0.672414	0.406892	0.720882	0.467289	0.74997	0.785645	0.399851	0.476875	0.643819	0.743828	0.592115	0.643662	0.156433	0.78334	0.638252	0.652925	0.650032	0.436375	0.623848
GSM858137	0.180735	0.629103	0.539787	0.696874	0.704599	0.689783	0.255728	0.737898	0.30328	0.740566	0.649792	0.370653	0.48614	0.539724	0.732201	0.596302	0.635877	0.193879	0.709719	0.571216	0.558494	0.568779	0.44694	0.599868
GSM1379261	0.306401	0.745343	0.700232	0.704727	0.701234	0.682462	0.355742	0.708492	0.402213	0.760401	0.756512	0.442051	0.419988	0.549625	0.686685	0.597546	0.609458	0.201239	0.689411	0.56568	0.561873	0.543826	0.435941	0.599471
GSM1379262	0.710458	0.659142	0.661946	0.736277	0.633961	0.704458	0.334897	0.665794	0.521451	0.793537	0.775694	0.424462	0.386204	0.530252	0.739923	0.49785	0.619871	0.254356	0.76642	0.552235	0.607048	0.581592	0.411526	0.539184
GSM1379263	0.552864	0.710709	0.737423	0.671667	0.72197	0.669801	0.434942	0.700864	0.428231	0.706611	0.741961	0.387919	0.345163	0.608435	0.764892	0.507779	0.583871	0.22555	0.693054	0.520963	0.544072	0.591342	0.454297	0.590088
GSM1379264	0.462628	0.822449	0.813269	0.745545	0.720871	0.622306	0.370731	0.690729	0.534588	0.79432	0.728908	0.514776	0.342761	0.496394	0.74289	0.52416	0.63251	0.237876	0.750292	0.575429	0.560036	0.592118	0.440641	0.690644
GSM1379265	0.653749	0.658178	0.787219	0.718352	0.741109	0.608026	0.368526	0.744073	0.566448	0.752269	0.850295	0.373119	0.480398	0.678843	0.774695	0.57165	0.605543	0.199811	0.789014	0.613506	0.62703	0.641232	0.440356	0.54793
GSM1379266	0.324896	0.749261	0.793216	0.790367	0.685537	0.667787	0.394556	0.721344	0.482574	0.774547	0.800082	0.421308	0.338909	0.505742	0.73642	0.568915	0.636208	0.284411	0.760363	0.631951	0.570396	0.613455	0.470217	0.592426
GSM1379267	0.384574	0.570809	0.551694	0.692073	0.714603	0.685946	0.452584	0.698673	0.40553	0.779446	0.800548	0.383384	0.499222	0.625075	0.728116	0.622867	0.659683	0.117181	0.781288	0.667371	0.631736	0.600999	0.422067	0.565331
GSM1379268	0.381281	0.759845	0.645423	0.701468	0.731422	0.629146	0.363157	0.71952	0.444784	0.758353	0.74697	0.367373	0.329495	0.484721	0.719795	0.517459	0.586058	0.419752	0.739682	0.595913	0.5506	0.571568	0.428329	0.60386
GSM1379269	0.454038	0.53186	0.720783	0.692977	0.695406	0.642398	0.454804	0.702525	0.439172	0.769277	0.810809	0.301179	0.407028	0.720627	0.787409	0.561225	0.630578	0.188373	0.769182	0.63148	0.657425	0.659774	0.442659	0.55616
GSM1379270	0.296998	0.697349	0.664002	0.620026	0.674851	0.664684	0.399429	0.691445	0.276616	0.687743	0.594353	0.325945	0.466789	0.457052	0.745151	0.495522	0.575595	0.229476	0.708792	0.481163	0.575327	0.482405	0.35645	0.557877
GSM1379271	0.443022	0.770049	0.870901	0.724371	0.694964	0.685784	0.396739	0.764522	0.460071	0.771841	0.81548	0.556402	0.410359	0.526935	0.768777	0.562068	0.601098	0.155251	0.725919	0.65093	0.617398	0.629507	0.445435	0.595258
GSM1379272	0.438461	0.704094	0.70547	0.708506	0.690764	0.671512	0.43555	0.699909	0.432001	0.730745	0.702587	0.464547	0.365571	0.541691	0.714492	0.546991	0.595347	0.157317	0.75583	0.58743	0.583641	0.555102	0.418343	0.600231
GSM1379273	0.204295	0.630261	0.56363	0.669362	0.629773	0.639246	0.299298	0.679732	0.356162	0.721829	0.569791	0.461561	0.339306	0.432851	0.732292	0.496611	0.565597	0.134986	0.680364	0.410499	0.552972	0.526501	0.415106	0.519384
GSM1379274	0.215173	0.739539	0.722358	0.702131	0.693415	0.68026	0.345412	0.661727	0.333742	0.715629	0.704483	0.539621	0.38033	0.467283	0.727843	0.508195	0.576931	0.267349	0.743125	0.48785	0.538422	0.530265	0.443677	0.61223
GSM1379275	0.27887	0.657236	0.524087	0.671845	0.665375	0.674942	0.265802	0.746057	0.383253	0.800091	0.649474	0.486388	0.408349	0.467749	0.686639	0.59793	0.588198	0.269773	0.738705	0.612073	0.583967	0.545245	0.408323	0.506615
GSM1379276	0.613077	0.717905	0.684565	0.72805	0.758783	0.678127	0.411898	0.736413	0.490734	0.773727	0.837272	0.393796	0.363157	0.578189	0.729313	0.544736	0.622347	0.313259	0.733684	0.640916	0.600792	0.601119	0.429073	0.616612
GSM1379277	0.478607	0.700794	0.726932	0.731558	0.698217	0.678819	0.313315	0.717973	0.453874	0.741244	0.783605	0.417408	0.405551	0.569565	0.674444	0.585715	0.638128	0.109394	0.74146	0.619361	0.600297	0.601958	0.427946	0.578757
GSM1379278	0.235302	0.62425	0.5759	0.684947	0.705435	0.674031	0.281526	0.675397	0.34979	0.721502	0.61726	0.414438	0.311503	0.465062	0.71876	0.487488	0.559725	0.34394	0.714586	0.46146	0.532309	0.528755	0.435431	0.577342
GSM1379279	0.181838	0.693466	0.592531	0.701441	0.686817	0.636228	0.401471	0.769253	0.359487	0.770583	0.708066	0.536914	0.341637	0.532047	0.709456	0.539474	0.629358	0.305571	0.751529	0.633053	0.578268	0.563973	0.43291	0.592546
GSM1379280	0.21977	0.630946	0.619023	0.637823	0.777029	0.648262	0.3966	0.707389	0.298444	0.697073	0.646426	0.800294	0.368445	0.490558	0.706947	0.507764	0.601804	0.185447	0.762988	0.502346	0.520993	0.586245	0.489979	0.656367
GSM1379281	0.423133	0.772274	0.802687	0.746409	0.719003	0.642285	0.324756	0.862463	0.482993	0.801401	0.884505	0.710602	0.351294	0.65649	0.740323	0.62942	0.64024	0.303875	0.763551	0.805374	0.645154	0.656346	0.446298	0.635192
GSM1379282	0.198859	0.717356	0.730583	0.707205	0.661993	0.658857	0.357281	0.707616	0.365623	0.728499	0.676087	0.480789	0.335666	0.439729	0.734994	0.5419	0.616848	0.202415	0.708716	0.565179	0.537083	0.58912	0.44097	0.588575
GSM1379283	0.292189	0.521703	0.6173	0.743966	0.668809	0.605039	0.33044	0.762216	0.464269	0.739444	0.854738	0.385781	0.483405	0.642589	0.753157	0.614077	0.670523	0.150446	0.786876	0.72043	0.650577	0.637657	0.383807	0.579429
GSM1379284	0.174932	0.531578	0.547682	0.707831	0.68811	0.673957	0.275422	0.683322	0.34419	0.743025	0.659283	0.34056	0.476818	0.499335	0.731217	0.568672	0.652211	0.308345	0.741239	0.469597	0.561678	0.551049	0.384269	0.527794
GSM1379285	0.557909	0.692598	0.729362	0.700453	0.69921	0.673603	0.399929	0.697293	0.462257	0.75433	0.745095	0.450221	0.394905	0.546471	0.752099	0.520198	0.584837	0.222415	0.73988	0.555467	0.568893	0.611856	0.456235	0.588661
GSM1379286	0.172592	0.677243	0.629862	0.690385	0.716553	0.61943	0.242285	0.70303	0.284404	0.714625	0.681806	0.411666	0.520883	0.418325	0.739519	0.497059	0.595086	0.219879	0.704804	0.518517	0.55327	0.547575	0.38653	0.58723
GSM1379287	0.280864	0.635751	0.675591	0.681422	0.652003	0.684934	0.409059	0.724941	0.377924	0.760348	0.776747	0.584461	0.336949	0.550198	0.738235	0.540511	0.623776	0.291326	0.789802	0.626857	0.570435	0.608884	0.432822	0.536443
GSM1379288	0.195886	0.692579	0.605741	0.676061	0.617031	0.705186	0.361821	0.682048	0.317311	0.697981	0.658967	0.340551	0.376942	0.474157	0.739304	0.535033	0.583392	0.314792	0.719663	0.552832	0.525134	0.548577	0.447276	0.582407
GSM1379289	0.159608	0.568755	0.54129	0.674802	0.675994	0.692748	0.377802	0.692738	0.359251	0.709747	0.613323	0.361998	0.42145	0.482985	0.70312	0.512842	0.599963	0.259927	0.729406	0.526594	0.525831	0.540385	0.496098	0.564234
GSM1379290	0.500562	0.58042	0.738258	0.717705	0.709305	0.618107	0.438841	0.659888	0.482156	0.739174	0.775557	0.362535	0.326249	0.620173	0.713921	0.577522	0.65654	0.149523	0.767081	0.600958	0.618451	0.659757	0.434595	0.582909
GSM1379291	0.352476	0.788237	0.81599	0.712416	0.685407	0.695003	0.427365	0.714752	0.424146	0.767992	0.812176	0.427416	0.454443	0.533319	0.743982	0.593501	0.624165	0.25164	0.747399	0.669706	0.594766	0.59771	0.41698	0.626009
GSM1379292	0.268085	0.542474	0.560924	0.643811	0.634231	0.669017	0.250699	0.622824	0.353014	0.794385	0.542282	0.0758398	0.382032	0.404377	0.71475	0.461145	0.574951	0.249273	0.732824	0.42263	0.539951	0.521291	0.361965	0.518761
GSM1379293	0.359411	0.576413	0.590409	0.64107	0.698522	0.64905	0.357212	0.67368	0.355511	0.708792	0.597314	0.397058	0.363705	0.396301	0.698115	0.433057	0.533803	0.286136	0.665467	0.40124	0.549934	0.5176	0.404996	0.485202
GSM1379294	0.352695	0.683725	0.730253	0.670488	0.677233	0.624222	0.384981	0.717131	0.412665	0.704816	0.710835	0.391933	0.329723	0.492253	0.728108	0.515806	0.579069	0.117605	0.737243	0.586182	0.616911	0.569503	0.470974	0.604898
GSM1379295	0.557315	0.731819	0.705123	0.806791	0.71345	0.616479	0.372304	0.732846	0.508458	0.792077	0.861804	0.525538	0.375637	0.584734	0.716782	0.554783	0.671158	0.237032	0.763758	0.682277	0.565934	0.609598	0.451082	0.596176
GSM1379296	0.190299	0.651156	0.565093	0.626506	0.735053	0.656597	0.291055	0.690689	0.346533	0.779507	0.613333	0.499326	0.37038	0.436888	0.711333	0.526778	0.589172	0.184152	0.758579	0.483327	0.557888	0.532981	0.397602	0.575829
GSM1379297	0.360725	0.664871	0.673551	0.746523	0.682264	0.658985	0.354143	0.679901	0.412388	0.73423	0.716037	0.399269	0.328199	0.465293	0.745311	0.528177	0.626767	0.297283	0.699639	0.537722	0.528086	0.593576	0.461269	0.549346
GSM1379298	0.322385	0.613645	0.672315	0.668838	0.699209	0.646516	0.480132	0.70692	0.395966	0.765098	0.820194	0.282057	0.46645	0.730949	0.713732	0.623225	0.628804	0.283948	0.801854	0.602507	0.607703	0.627082	0.395624	0.564295
GSM1379299	0.193991	0.673671	0.606479	0.663404	0.673862	0.660946	0.326638	0.706042	0.303385	0.726916	0.592327	0.426727	0.370092	0.483707	0.718116	0.529178	0.582097	0.089124	0.703595	0.494886	0.570642	0.498721	0.344297	0.571639
GSM1379300	0.275295	0.60551	0.651285	0.67739	0.668365	0.672394	0.327191	0.691267	0.336864	0.720524	0.698015	0.276844	0.372777	0.524054	0.683541	0.552731	0.647122	0.125401	0.758807	0.511439	0.581171	0.603232	0.417388	0.538094
GSM1379301	0.60406	0.83651	0.83884	0.719348	0.696565	0.639053	0.335225	0.769841	0.594344	0.768647	0.866484	0.313216	0.394205	0.506153	0.80377	0.572212	0.593424	0.188702	0.779592	0.678899	0.614166	0.599156	0.395358	0.570381
GSM1379302	0.208612	0.660514	0.595975	0.62702	0.700827	0.626049	0.334862	0.700376	0.253166	0.721971	0.558685	0.290467	0.374087	0.390438	0.731322	0.49738	0.522779	0.0758142	0.73585	0.476111	0.498318	0.507438	0.309779	0.517257
GSM1379303	0.488859	0.721056	0.715657	0.718802	0.739207	0.704881	0.416495	0.756182	0.440373	0.778461	0.77134	0.504215	0.513751	0.563763	0.742446	0.612392	0.625959	0.244024	0.786268	0.651449	0.627723	0.616329	0.415962	0.555417
GSM1379304	0.178475	0.565571	0.591429	0.692473	0.707173	0.711131	0.283221	0.682661	0.324609	0.80127	0.73855	0.372687	0.391901	0.503547	0.793707	0.531246	0.591931	0.202107	0.768034	0.592102	0.600799	0.588288	0.414732	0.529725
GSM1379305	0.255705	0.65977	0.618438	0.660559	0.650298	0.674384	0.312837	0.706327	0.370463	0.708084	0.645785	0.331922	0.388485	0.420453	0.715968	0.504494	0.622985	0.304145	0.744421	0.575722	0.57404	0.530266	0.385645	0.55154
GSM1379306	0.337649	0.762677	0.762316	0.721171	0.702998	0.65528	0.37686	0.643223	0.46064	0.731096	0.675064	0.502261	0.301315	0.531687	0.730304	0.505427	0.622426	0.163	0.720298	0.497546	0.510995	0.602128	0.418588	0.647306
GSM1379307	0.61058	0.806903	0.939342	0.804976	0.773927	0.66148	0.408104	0.865766	0.726963	0.832703	0.994892	0.607955	0.486833	0.667472	0.806646	0.652491	0.724006	0.178655	0.801176	0.823876	0.747996	0.751692	0.465491	0.651805
GSM1379308	0.421745	0.788526	0.828256	0.718935	0.655945	0.700293	0.296109	0.725914	0.466629	0.7475	0.747435	0.474403	0.351181	0.461588	0.746018	0.562084	0.622575	0.373653	0.756207	0.600904	0.55336	0.602919	0.44952	0.545638
GSM1379309	0.281047	0.649996	0.623951	0.687681	0.627078	0.674324	0.294504	0.65076	0.36193	0.749474	0.657436	0.44362	0.418374	0.39468	0.774333	0.489456	0.606858	0.455564	0.711828	0.489921	0.54487	0.555092	0.446588	0.565835
GSM1379310	0.564236	0.648836	0.742576	0.683801	0.725719	0.670861	0.361485	0.682738	0.48305	0.744998	0.764865	0.357551	0.341918	0.563784	0.777364	0.535817	0.613866	0.17735	0.760495	0.56475	0.608498	0.610763	0.438416	0.558813
GSM1379311	0.19079	0.628528	0.602705	0.653952	0.70959	0.661697	0.276611	0.677809	0.336672	0.719702	0.634205	0.340095	0.360491	0.463374	0.763442	0.512476	0.559055	0.290805	0.728095	0.52551	0.557163	0.555759	0.413316	0.527573
GSM1379312	0.201297	0.644633	0.593629	0.694118	0.693048	0.658851	0.519918	0.647168	0.345375	0.782848	0.693531	0.310514	0.419358	0.544305	0.738111	0.497471	0.593944	0.287721	0.718457	0.591616	0.607241	0.536321	0.382351	0.590397
GSM1379313	0.292334	0.713048	0.674818	0.6465	0.723495	0.644069	0.297995	0.693005	0.346842	0.748674	0.689555	0.558979	0.357234	0.494137	0.722333	0.526677	0.512937	0.17034	0.725228	0.553463	0.544594	0.542809	0.414758	0.626175
GSM1379314	0.234301	0.610487	0.515316	0.686181	0.710341	0.712715	0.367426	0.671945	0.31544	0.770044	0.671466	0.291818	0.321613	0.591829	0.686107	0.547634	0.605519	0.278317	0.720887	0.474638	0.541062	0.593566	0.466412	0.558283
GSM1379315	0.353676	0.75855	0.841169	0.720299	0.709666	0.67444	0.414903	0.727731	0.494931	0.790185	0.754427	0.842813	0.659144	0.488456	0.76994	0.55867	0.647493	0.208263	0.777294	0.648394	0.602409	0.62474	0.472754	0.654038
GSM1379316	0.169991	0.656104	0.58116	0.658701	0.703658	0.66611	0.210519	0.702445	0.286697	0.708358	0.591508	0.483866	0.399311	0.454312	0.72303	0.547483	0.605819	0.180673	0.710511	0.480058	0.538542	0.54591	0.463458	0.62377
GSM1379317	0.370939	0.772256	0.819399	0.750209	0.703787	0.687516	0.301273	0.76345	0.467856	0.768078	0.820261	0.464561	0.352524	0.493126	0.738399	0.560448	0.641057	0.294065	0.748268	0.677117	0.632108	0.643408	0.446158	0.644025
GSM1379318	0.347612	0.740803	0.855932	0.789239	0.700859	0.66372	0.350838	0.759072	0.50823	0.756412	0.857223	0.458664	0.365737	0.452892	0.768272	0.586352	0.658732	0.199284	0.743307	0.719854	0.621511	0.643063	0.430466	0.595056
GSM1379319	0.28813	0.62194	0.674343	0.657887	0.648039	0.644764	0.277233	0.667575	0.305121	0.717211	0.673709	0.342342	0.351957	0.478577	0.734617	0.5205	0.580044	0.114451	0.689306	0.535024	0.557189	0.56346	0.432253	0.573312
GSM1379320	0.348638	0.717325	0.797246	0.719329	0.688619	0.667155	0.36792	0.708516	0.412844	0.78548	0.807504	0.457942	0.355233	0.528031	0.758137	0.557589	0.638578	0.234965	0.788436	0.64559	0.645548	0.60552	0.383705	0.596881
GSM1379321	0.156508	0.619826	0.547157	0.638321	0.713325	0.684865	0.241977	0.631917	0.316684	0.702772	0.608086	0.426254	0.37248	0.432451	0.717575	0.47863	0.52931	0.31329	0.710287	0.400245	0.575686	0.500841	0.432853	0.604793
GSM1379322	0.348536	0.791083	0.779088	0.700105	0.675262	0.71401	0.394709	0.717841	0.485757	0.784342	0.777646	0.418104	0.342714	0.470674	0.755447	0.559747	0.635029	0.179202	0.734318	0.639606	0.590796	0.595683	0.442993	0.595838
GSM1379323	0.183074	0.654583	0.580585	0.646412	0.715855	0.658824	0.296657	0.731088	0.319921	0.753972	0.595049	0.464633	0.360133	0.470158	0.710746	0.50404	0.564263	0.426491	0.71778	0.483551	0.513965	0.538326	0.416983	0.578945
GSM1379324	0.319655	0.671197	0.605148	0.671963	0.734265	0.671791	0.304569	0.734742	0.352572	0.74652	0.649997	0.407469	0.404919	0.47591	0.729934	0.526146	0.546147	0.235593	0.712363	0.534894	0.545536	0.563727	0.41721	0.598041
GSM1379325	0.288193	0.770942	0.740126	0.695179	0.692042	0.673167	0.385454	0.750746	0.356829	0.756106	0.747102	0.445774	0.439527	0.611356	0.722677	0.537272	0.604846	0.230952	0.738695	0.611838	0.564743	0.604035	0.43803	0.646876
GSM1379326	0.299393	0.691097	0.729219	0.703512	0.706273	0.664462	0.352822	0.68146	0.40046	0.739128	0.685171	0.346225	0.417579	0.44147	0.763948	0.553009	0.612391	0.163129	0.706549	0.520031	0.537758	0.582026	0.458297	0.60623
GSM1379327	0.29549	0.660326	0.669123	0.665225	0.637873	0.648296	0.221911	0.721954	0.404462	0.744369	0.663216	0.550976	0.377844	0.439189	0.704306	0.528931	0.56409	0.0862299	0.704831	0.558324	0.560605	0.549381	0.403689	0.550069
GSM1379328	0.654845	0.792445	0.942303	0.763842	0.743482	0.645637	0.441739	0.752317	0.662147	0.756663	0.906953	0.488674	0.435355	0.554387	0.783967	0.59812	0.719304	0.192241	0.795629	0.701216	0.690898	0.728368	0.462712	0.646508
GSM1379329	0.223954	0.572753	0.649078	0.67768	0.689311	0.65754	0.358343	0.697953	0.329264	0.728914	0.666042	0.568906	0.520648	0.538977	0.715854	0.543012	0.626787	0.185415	0.759566	0.568422	0.578328	0.549347	0.442571	0.520251
GSM1379330	0.743655	0.613074	0.785016	0.681151	0.665605	0.612841	0.478444	0.653243	0.634973	0.753258	0.826909	0.27034	0.430125	0.615528	0.777988	0.542903	0.64622	0.0978947	0.773581	0.577533	0.647319	0.64209	0.429691	0.556733
GSM1523727	0.217161	0.579998	0.579412	0.659767	0.65492	0.649423	0.281791	0.633679	0.328845	0.71976	0.592017	0.369267	0.390202	0.388834	0.74521	0.449477	0.561838	0.0867861	0.666303	0.463059	0.491028	0.526865	0.459653	0.476196
GSM1523728	0.265492	0.760837	0.707058	0.718617	0.683676	0.65575	0.355213	0.71475	0.400543	0.738932	0.775385	0.486528	0.347841	0.519989	0.746653	0.584989	0.636976	0.214752	0.730391	0.60778	0.563998	0.593531	0.438485	0.58895
GSM1523729	0.247018	0.647605	0.62926	0.664905	0.673279	0.650483	0.468487	0.706415	0.404871	0.736201	0.657844	0.347192	0.405254	0.525467	0.73984	0.509799	0.597249	0.223385	0.724821	0.475945	0.542833	0.573024	0.441061	0.609337
GSM1523744	0.234677	0.731702	0.624203	0.69845	0.668069	0.692403	0.252128	0.677105	0.335215	0.733968	0.607849	0.591828	0.369939	0.445467	0.70131	0.57831	0.591095	0.0833983	0.684007	0.560342	0.503118	0.548481	0.472121	0.56456
GSM1523745	0.242011	0.758722	0.651293	0.69788	0.680173	0.643581	0.329559	0.705229	0.383164	0.739593	0.707085	0.384634	0.423076	0.487734	0.698181	0.549069	0.578963	0.23897	0.728816	0.604034	0.557844	0.559169	0.403589	0.669376
GSM1523746	0.272719	0.678987	0.602135	0.622504	0.695232	0.62882	0.405096	0.719736	0.308978	0.750401	0.646416	0.200786	0.315874	0.5629	0.679466	0.49951	0.5532	0.226382	0.69183	0.536739	0.519622	0.556233	0.358058	0.604255
GSM1523747	0.169702	0.678526	0.615249	0.667509	0.668875	0.664625	0.219447	0.709017	0.29812	0.713249	0.664706	0.253872	0.371687	0.363668	0.732246	0.518584	0.571892	0.378587	0.686476	0.580348	0.542768	0.52678	0.393039	0.602888
GSM1523748	0.394357	0.625457	0.665013	0.690012	0.712383	0.628544	0.388632	0.744762	0.373166	0.761475	0.738233	0.359924	0.417668	0.534229	0.732259	0.504792	0.572131	0.199477	0.738275	0.579062	0.566216	0.593424	0.445351	0.60026
GSM1523765	0.195382	0.679997	0.620254	0.665421	0.641811	0.659169	0.33416	0.661762	0.258722	0.744648	0.577299	0.3288	0.330924	0.446511	0.669115	0.552417	0.557834	0.0363234	0.718307	0.555728	0.516905	0.530108	0.398335	0.527011
GSM1523768	0.26759	0.702759	0.686185	0.748512	0.716717	0.677827	0.39769	0.728267	0.40517	0.783009	0.809501	0.55468	0.558691	0.648456	0.734929	0.590619	0.649347	0.277534	0.779848	0.650093	0.606578	0.634668	0.44834	0.622155
GSM1523769	0.610114	0.71654	0.792753	0.711879	0.736493	0.662972	0.461703	0.792176	0.55049	0.797982	0.851912	0.419127	0.395038	0.624421	0.770584	0.59407	0.628223	0.350747	0.790018	0.666525	0.643848	0.666993	0.430555	0.607752
GSM1523770	0.248922	0.782953	0.799129	0.740863	0.644396	0.640514	0.321126	0.698183	0.423671	0.71012	0.772183	0.532595	0.42608	0.510615	0.677608	0.544312	0.622239	0.191936	0.728514	0.631479	0.586034	0.579657	0.347727	0.562887
GSM1523771	0.298175	0.587458	0.800129	0.69355	0.686203	0.600457	0.412866	0.723575	0.466434	0.780401	0.851377	0.318859	0.452734	0.671327	0.71637	0.635393	0.673505	0.19257	0.794164	0.64696	0.645633	0.661215	0.380074	0.588006
GSM1523772	0.369597	0.502342	0.667223	0.664979	0.694159	0.648742	0.375477	0.638831	0.37176	0.766872	0.730526	0.33355	0.417905	0.516606	0.730162	0.577263	0.653209	0.101677	0.759987	0.540004	0.599165	0.610646	0.466707	0.573255
GSM1523773	0.384718	0.603574	0.746959	0.679124	0.671824	0.595828	0.450953	0.642912	0.442034	0.735196	0.800999	0.288885	0.469018	0.666361	0.728915	0.555706	0.640709	0.182039	0.776686	0.591771	0.661452	0.628527	0.423559	0.592904
GSM1523774	0.579232	0.602041	0.652512	0.65902	0.690837	0.585459	0.503034	0.693256	0.501116	0.74458	0.727235	0.28613	0.361249	0.623337	0.715791	0.502456	0.619991	0.204933	0.739714	0.559197	0.579419	0.606172	0.409932	0.572099
GSM1523775	0.270371	0.716239	0.665897	0.661596	0.63687	0.68405	0.315253	0.706002	0.39148	0.706253	0.690986	0.38165	0.375624	0.494741	0.714846	0.511485	0.549899	0.269631	0.720266	0.554543	0.521531	0.548546	0.413562	0.579466
GSM1523776	0.386471	0.803327	0.79511	0.729698	0.644472	0.66348	0.32765	0.652888	0.442753	0.74368	0.674483	0.56991	0.365991	0.374465	0.740308	0.513264	0.646116	0.0896893	0.713306	0.533655	0.562225	0.594634	0.3808	0.534355
GSM1523777	0.213071	0.61636	0.567462	0.64133	0.627268	0.686079	0.318686	0.688727	0.268362	0.716549	0.561152	0.434007	0.381718	0.398281	0.674045	0.486798	0.577104	0.173044	0.730271	0.505689	0.50598	0.512289	0.378816	0.497325
GSM1523778	0.350816	0.696782	0.68635	0.706577	0.736369	0.686038	0.387748	0.74634	0.409778	0.776532	0.818291	0.486718	0.415065	0.573881	0.758296	0.572825	0.627879	0.423947	0.80459	0.671639	0.625263	0.62449	0.487798	0.622885
GSM1523779	0.433665	0.708997	0.746011	0.69409	0.67419	0.668267	0.317556	0.736516	0.485182	0.731886	0.720619	0.330083	0.330209	0.457015	0.728987	0.516638	0.606098	0.174034	0.716662	0.57586	0.570355	0.564066	0.420186	0.586916
GSM1523780	0.204822	0.722142	0.711985	0.684303	0.68179	0.675148	0.224862	0.74417	0.370782	0.758794	0.703601	0.419485	0.41279	0.49508	0.75381	0.565878	0.623029	0.203511	0.741454	0.593991	0.585989	0.589143	0.41355	0.662552
GSM1523781	0.074114	0.59367	0.464309	0.598333	0.63095	0.647281	0.27266	0.670931	0.253952	0.797966	0.51334	0.129063	0.393237	0.3641	0.661215	0.441258	0.542427	0.247527	0.722969	0.450449	0.558525	0.47063	0.319233	0.555082
GSM1523782	0.137543	0.688826	0.61026	0.713314	0.688185	0.698288	0.282184	0.702607	0.367781	0.74911	0.742038	0.548914	0.423301	0.522936	0.691139	0.584163	0.63825	0.199017	0.74563	0.627995	0.558331	0.569997	0.430623	0.624004
GSM1523783	0.797934	0.64891	0.759173	0.721528	0.70912	0.657305	0.500168	0.728503	0.711102	0.799622	0.841842	0.604096	0.371566	0.576347	0.784584	0.530215	0.624997	0.444655	0.768691	0.632909	0.6279	0.622185	0.486717	0.552655
GSM1523784	0.403824	0.67769	0.716387	0.72471	0.719883	0.643178	0.488034	0.720503	0.432739	0.788101	0.786371	0.41314	0.462562	0.581336	0.74456	0.506946	0.61334	0.297416	0.763625	0.565676	0.59805	0.605033	0.429725	0.636808
GSM1523785	0.377984	0.668356	0.723108	0.713207	0.715539	0.672995	0.361811	0.726105	0.406113	0.760228	0.740272	0.395021	0.408571	0.462484	0.757729	0.554732	0.636224	0.229612	0.73707	0.582588	0.573728	0.611513	0.475363	0.575652
GSM1523786	0.61828	0.71521	0.790965	0.724333	0.730963	0.631394	0.486672	0.714038	0.561918	0.795579	0.834025	0.372093	0.442909	0.543806	0.757659	0.552455	0.622226	0.147057	0.774943	0.571857	0.617575	0.625666	0.43318	0.594015
GSM1523787	0.250049	0.62089	0.612411	0.631734	0.671952	0.680262	0.189484	0.625725	0.298994	0.687855	0.584499	0.430219	0.453986	0.419611	0.744022	0.485012	0.547928	0.233495	0.711704	0.439249	0.509785	0.5115	0.404541	0.613974
GSM1523788	0.686083	0.671327	0.743001	0.694156	0.758808	0.623941	0.515341	0.731887	0.603366	0.815308	0.824903	0.433839	0.536703	0.674936	0.743766	0.603135	0.617369	0.223891	0.78788	0.660729	0.62562	0.637749	0.416868	0.631107
GSM1523789	0.165679	0.585892	0.645069	0.66957	0.673281	0.652952	0.273611	0.705745	0.335667	0.758747	0.701116	0.385045	0.402943	0.418672	0.705257	0.562317	0.618571	0.179183	0.761595	0.591817	0.589755	0.561231	0.415023	0.609192
GSM1523790	0.215801	0.777084	0.786996	0.811059	0.688283	0.686878	0.432247	0.742156	0.482077	0.754811	0.837086	0.450045	0.419086	0.604762	0.769519	0.60759	0.660149	0.456931	0.796038	0.700259	0.614263	0.639805	0.453154	0.691748
GSM1523791	0.322054	0.758727	0.776297	0.740212	0.713733	0.635931	0.285825	0.687568	0.453035	0.728953	0.773192	0.598779	0.439511	0.51968	0.752759	0.589559	0.668071	0.153365	0.749197	0.627219	0.587697	0.617197	0.473204	0.659494
GSM1523792	0.343145	0.727473	0.708787	0.665881	0.679776	0.658744	0.361884	0.702966	0.359811	0.73279	0.645122	0.49578	0.278559	0.443925	0.711833	0.485738	0.539026	0.182361	0.726113	0.525419	0.534966	0.534235	0.439017	0.609114
GSM1523793	0.409614	0.727022	0.755355	0.677819	0.684432	0.648251	0.307634	0.699207	0.401938	0.701376	0.723968	0.510749	0.350147	0.493493	0.718858	0.526198	0.644212	0.326537	0.733994	0.571274	0.548273	0.561701	0.476774	0.591897
GSM1523794	0.233139	0.677283	0.834029	0.742634	0.70215	0.686717	0.302591	0.814264	0.427998	0.783006	0.857358	0.594296	0.595379	0.529597	0.758651	0.650683	0.668562	0.397108	0.71638	0.65993	0.636205	0.652907	0.459841	0.693265
GSM1523795	0.236026	0.686503	0.66131	0.696358	0.688705	0.691806	0.257457	0.723405	0.34085	0.761647	0.691292	0.476092	0.42522	0.550997	0.780198	0.545713	0.602522	0.302405	0.752002	0.625953	0.605341	0.558658	0.340338	0.542163
GSM1523796	0.334096	0.634112	0.700233	0.786665	0.714594	0.63952	0.457308	0.814023	0.508022	0.813869	0.905867	0.345165	0.513328	0.708557	0.77905	0.628479	0.682338	0.537571	0.859596	0.746436	0.679378	0.672088	0.42314	0.597288
GSM1523797	0.24032	0.6523	0.67933	0.685283	0.693563	0.664758	0.391834	0.716894	0.409821	0.765742	0.72268	0.410813	0.339085	0.498493	0.721596	0.507009	0.527486	0.290943	0.710281	0.530241	0.548739	0.564318	0.430269	0.633568
GSM1523798	0.881833	0.814513	0.930242	0.765799	0.761324	0.666629	0.588467	0.823994	0.791959	0.783943	0.979668	0.576015	0.547129	0.731321	0.81487	0.647664	0.676532	0.333061	0.813614	0.720049	0.715462	0.686411	0.447214	0.634656
GSM1523799	0.254883	0.738915	0.673637	0.737607	0.686841	0.69328	0.319607	0.723969	0.418657	0.80164	0.801656	0.419613	0.489318	0.62791	0.733955	0.564314	0.647353	0.301668	0.771563	0.667829	0.625556	0.537832	0.373856	0.657865
GSM1523800	0.287051	0.799875	0.825047	0.753203	0.619243	0.639089	0.340135	0.762568	0.455255	0.764154	0.826732	0.5491	0.459275	0.508394	0.755268	0.610274	0.633797	0.23871	0.716866	0.651002	0.597301	0.612453	0.424447	0.525184
GSM1523801	0.355566	0.77663	0.767438	0.679171	0.661686	0.670931	0.362211	0.701541	0.431606	0.717907	0.74362	0.655084	0.402587	0.442226	0.736777	0.575581	0.637691	0.19852	0.708212	0.582869	0.562794	0.604093	0.482256	0.616042
GSM1523802	0.298232	0.672227	0.643664	0.718632	0.703586	0.68165	0.276679	0.732276	0.380467	0.776062	0.743187	0.329293	0.340544	0.499684	0.732976	0.545717	0.615321	0.370657	0.730933	0.558469	0.572136	0.563371	0.443999	0.545774
GSM1523803	0.361173	0.718758	0.688276	0.668062	0.662121	0.642659	0.370095	0.691364	0.431617	0.742888	0.715181	0.294149	0.432781	0.507418	0.721679	0.500221	0.588744	0.177585	0.728432	0.565	0.585199	0.541477	0.390668	0.597441
GSM1523804	0.572195	0.705698	0.731291	0.706552	0.694476	0.680863	0.415193	0.760113	0.498779	0.783052	0.806175	0.374904	0.433026	0.583411	0.749815	0.558435	0.605102	0.206104	0.760645	0.642541	0.627304	0.63037	0.433342	0.612865
GSM1523805	0.408953	0.731387	0.803695	0.7088	0.71374	0.678044	0.345681	0.72672	0.520035	0.793089	0.826444	0.536252	0.386287	0.543729	0.73238	0.557188	0.663357	0.293699	0.759535	0.627019	0.603623	0.627837	0.463705	0.625364
GSM1523806	0.378086	0.67073	0.694514	0.704696	0.687061	0.68726	0.356944	0.719356	0.463376	0.759403	0.764786	0.565276	0.362574	0.53432	0.748671	0.526894	0.605712	0.234345	0.73216	0.595561	0.574697	0.567956	0.451666	0.563581
GSM1523807	0.389444	0.750341	0.688398	0.72896	0.724919	0.702601	0.460268	0.743042	0.480246	0.801719	0.811839	0.409856	0.465004	0.654686	0.756787	0.555336	0.6394	0.450271	0.790045	0.658743	0.638183	0.596197	0.39	0.607879
GSM1523808	0.487436	0.715618	0.77632	0.719355	0.701139	0.672356	0.470064	0.758507	0.499182	0.780872	0.816054	0.426999	0.352609	0.576295	0.755174	0.588408	0.641087	0.341971	0.795905	0.659818	0.643061	0.629331	0.457854	0.609259
GSM1523809	0.364195	0.722242	0.731531	0.713098	0.636079	0.685689	0.331546	0.737376	0.440266	0.70462	0.765559	0.513926	0.402445	0.481834	0.714751	0.545088	0.590257	0.157737	0.718605	0.571833	0.564881	0.584519	0.462752	0.526638
GSM1523810	0.418995	0.793992	0.882166	0.760195	0.706127	0.698765	0.34445	0.765915	0.501492	0.756172	0.910088	0.629102	0.531023	0.559344	0.760043	0.617647	0.721788	0.218923	0.761795	0.694511	0.635766	0.670157	0.485478	0.656815
GSM1523811	0.526525	0.781641	0.811498	0.718434	0.710372	0.669389	0.368188	0.752108	0.550588	0.764305	0.818707	0.514368	0.351171	0.543963	0.753562	0.566425	0.628252	0.25316	0.734872	0.634072	0.583412	0.615704	0.437744	0.639179
GSM1523812	0.469092	0.785745	0.85814	0.723507	0.724028	0.669112	0.377737	0.763346	0.515421	0.785208	0.880283	0.471889	0.51395	0.620049	0.765448	0.585056	0.677535	0.206108	0.772113	0.686959	0.661538	0.65849	0.404593	0.624473
GSM1523813	0.17748	0.680836	0.631796	0.688847	0.660282	0.643185	0.417072	0.691107	0.288442	0.733754	0.617672	0.509104	0.409473	0.486065	0.705536	0.560613	0.588972	0.188325	0.710122	0.570592	0.533412	0.547047	0.426826	0.622938
GSM1523814	0.295887	0.713774	0.667606	0.698378	0.660208	0.661419	0.327058	0.719104	0.394436	0.747123	0.713846	0.467823	0.528726	0.51462	0.736401	0.523952	0.589032	0.122426	0.738998	0.653117	0.610878	0.561938	0.416159	0.570597
GSM1523815	0.270848	0.693412	0.710682	0.651509	0.69567	0.625593	0.251846	0.707597	0.42228	0.70451	0.612682	0.421458	0.327699	0.368284	0.724967	0.518083	0.604538	0.155458	0.72364	0.565092	0.545849	0.55278	0.38017	0.628636
GSM1523816	0.150966	0.658498	0.638705	0.651619	0.679054	0.687578	0.273639	0.661189	0.279257	0.738416	0.632315	0.436361	0.39321	0.416662	0.728224	0.523465	0.554641	0.224594	0.713315	0.518668	0.515848	0.555016	0.436613	0.601266
GSM1523817	0.327137	0.592006	0.554994	0.620586	0.700737	0.620086	0.321814	0.705845	0.342608	0.739674	0.565886	0.250145	0.373297	0.456551	0.709289	0.481488	0.57898	0.0771498	0.71416	0.485103	0.586568	0.487873	0.312533	0.579406
GSM1523818	0.297283	0.654492	0.681585	0.724919	0.687956	0.667877	0.301285	0.659937	0.424874	0.729549	0.725804	0.402039	0.363583	0.418435	0.738832	0.500717	0.586103	0.168108	0.664876	0.509943	0.53422	0.55114	0.458943	0.516111
GSM1523819	0.179892	0.592621	0.543915	0.632006	0.646426	0.724782	0.22469	0.669492	0.349142	0.690812	0.574169	0.338093	0.313703	0.448993	0.749847	0.530644	0.572214	0.264606	0.721777	0.499519	0.532711	0.517695	0.385049	0.49989
GSM1523820	0.182778	0.645659	0.648387	0.697372	0.698589	0.693618	0.289584	0.733014	0.388602	0.758432	0.713816	0.684149	0.512125	0.478933	0.81579	0.544474	0.588171	0.522991	0.76061	0.604791	0.576915	0.537146	0.404437	0.570993
GSM1523821	0.37842	0.732662	0.690392	0.699697	0.677882	0.655579	0.337422	0.725341	0.427948	0.738624	0.735918	0.468266	0.367357	0.431962	0.727633	0.5107	0.604326	0.314033	0.696467	0.536521	0.542757	0.609494	0.44709	0.596153
GSM1523822	0.315981	0.732718	0.791548	0.784734	0.722197	0.621046	0.454857	0.752073	0.480338	0.78218	0.879806	0.43122	0.469407	0.609997	0.754507	0.565466	0.672819	0.561211	0.790073	0.646267	0.613256	0.623146	0.465352	0.655396
GSM1523823	0.398413	0.815037	0.78519	0.778683	0.691039	0.623738	0.323338	0.711693	0.535435	0.736008	0.826172	0.474926	0.376021	0.53816	0.771194	0.56439	0.640235	0.273898	0.760993	0.626529	0.574414	0.624407	0.431123	0.577568
GSM1523824	0.304703	0.70089	0.665667	0.678276	0.652713	0.675322	0.399788	0.675238	0.354067	0.745839	0.697918	0.720136	0.324253	0.469657	0.716027	0.539376	0.632153	0.214586	0.734389	0.604675	0.575005	0.567522	0.477966	0.543217
GSM1523825	0.151133	0.542176	0.50935	0.671173	0.686918	0.67928	0.194338	0.723548	0.312865	0.807244	0.53039	0.366621	0.324118	0.447776	0.661713	0.510049	0.522686	0.196786	0.715711	0.529431	0.503481	0.538814	0.387808	0.565451
GSM1523826	0.549754	0.70536	0.768134	0.73033	0.719888	0.646856	0.326279	0.763695	0.475955	0.755862	0.73885	0.365457	0.379285	0.542201	0.772745	0.530848	0.617004	0.283384	0.757752	0.640647	0.621989	0.59015	0.419102	0.578279
GSM1523827	0.739288	0.720815	0.844185	0.710409	0.72652	0.638732	0.491062	0.735741	0.631303	0.804275	0.876134	0.397465	0.520759	0.558841	0.771469	0.546164	0.666159	0.279993	0.742442	0.649132	0.645112	0.64476	0.460229	0.607414
GSM1523828	0.429985	0.690468	0.658445	0.72456	0.72104	0.607228	0.380508	0.752045	0.397646	0.785911	0.801408	0.474042	0.358848	0.627777	0.739439	0.573489	0.615067	0.166505	0.770478	0.670209	0.617211	0.61252	0.39679	0.606168
GSM1523829	0.273475	0.620109	0.628954	0.633732	0.687431	0.648715	0.285524	0.713335	0.388991	0.746873	0.637598	0.261885	0.312378	0.466808	0.801541	0.50305	0.597086	0.404769	0.714062	0.526674	0.553499	0.530204	0.376737	0.532098
GSM1523830	0.392795	0.776292	0.759665	0.732772	0.634929	0.721868	0.352261	0.708193	0.457298	0.738415	0.735245	0.62126	0.381326	0.500101	0.752731	0.511546	0.645032	0.17621	0.694178	0.56029	0.56909	0.585564	0.434647	0.547159
GSM1523831	0.193595	0.670419	0.55337	0.627079	0.689188	0.625026	0.33705	0.664117	0.283809	0.710195	0.566442	0.337612	0.303871	0.42563	0.680856	0.475531	0.59111	0.165117	0.701375	0.523959	0.530634	0.504755	0.426354	0.585609
GSM1523832	0.469538	0.681198	0.691567	0.733072	0.749339	0.659449	0.294865	0.726602	0.4331	0.762592	0.734564	0.322997	0.326602	0.49447	0.73833	0.54595	0.63724	0.278936	0.726949	0.57392	0.579989	0.587633	0.425764	0.598506
GSM1523833	0.218226	0.710762	0.665108	0.681991	0.705997	0.65464	0.274976	0.723354	0.388377	0.766498	0.661394	0.518885	0.393475	0.579961	0.722827	0.511323	0.568605	0.250487	0.714083	0.559232	0.544144	0.558997	0.430686	0.588846
GSM1523834	0.654595	0.733499	0.831315	0.756077	0.748473	0.659747	0.479316	0.813897	0.644088	0.831253	0.927273	0.379097	0.514835	0.732999	0.765079	0.599947	0.664679	0.401896	0.782551	0.740503	0.680669	0.677673	0.459756	0.585006
GSM1523835	0.255024	0.625594	0.501571	0.62987	0.690617	0.623691	0.204339	0.679043	0.339203	0.739025	0.699849	0.392778	0.238097	0.540021	0.699114	0.539541	0.604173	0.16702	0.737237	0.57149	0.60411	0.546615	0.409967	0.582411
GSM1523836	0.348803	0.798039	0.724739	0.765796	0.697593	0.631246	0.431971	0.744895	0.485576	0.814344	0.847111	0.458086	0.489355	0.659773	0.727945	0.535829	0.626622	0.464558	0.787719	0.656246	0.613312	0.615029	0.409274	0.587772
GSM1523837	0.225952	0.618411	0.591842	0.591785	0.602065	0.655008	0.444772	0.678665	0.273671	0.665783	0.551213	0.405108	0.319591	0.429753	0.743617	0.453834	0.53284	0.283965	0.720294	0.478389	0.498694	0.529607	0.415658	0.511151
GSM1523838	0.389146	0.796952	0.815919	0.75863	0.6507	0.642614	0.336983	0.747869	0.476733	0.764456	0.834934	0.539666	0.418052	0.576558	0.732105	0.563351	0.66687	0.195207	0.749531	0.683284	0.595474	0.657463	0.443875	0.622417
GSM1523839	0.402437	0.691509	0.620934	0.730894	0.756054	0.679579	0.48296	0.744652	0.444165	0.805353	0.84583	0.508545	0.375557	0.630683	0.749823	0.575657	0.644402	0.442479	0.822584	0.731406	0.655234	0.641997	0.472663	0.651757
GSM1523840	0.233517	0.736822	0.660082	0.64607	0.707464	0.61163	0.259514	0.688865	0.268255	0.713897	0.614046	0.46271	0.406045	0.5037	0.68729	0.485048	0.57999	0.198919	0.687654	0.558755	0.503352	0.538526	0.444843	0.659037
GSM1523841	0.28106	0.722899	0.673542	0.672543	0.672405	0.671134	0.342816	0.73091	0.385504	0.719213	0.723558	0.46716	0.37787	0.471431	0.708394	0.518874	0.618873	0.278122	0.736497	0.640405	0.601394	0.577245	0.40416	0.618221
GSM1523842	0.447816	0.694842	0.739224	0.675783	0.733218	0.665862	0.402316	0.738778	0.445011	0.774551	0.722819	0.314081	0.295349	0.547725	0.720797	0.520303	0.596558	0.215099	0.727479	0.555553	0.587854	0.572482	0.394889	0.591944
GSM1523843	0.443529	0.680983	0.695808	0.683964	0.733997	0.666086	0.39297	0.714766	0.426064	0.779115	0.777338	0.33184	0.36336	0.581544	0.763323	0.568038	0.612925	0.146175	0.766554	0.605973	0.607241	0.616702	0.457817	0.628864
GSM1523844	0.17179	0.608566	0.526958	0.665915	0.679427	0.655015	0.18865	0.71037	0.307393	0.773735	0.639495	0.50228	0.35527	0.522577	0.710747	0.56762	0.623871	0.139754	0.729407	0.625622	0.547863	0.562185	0.394539	0.596647
GSM1523845	0.355962	0.723444	0.695167	0.731109	0.736156	0.708741	0.304518	0.753495	0.461249	0.77034	0.859726	0.576823	0.443511	0.570527	0.732592	0.61648	0.674266	0.24414	0.763937	0.74995	0.653351	0.629911	0.412014	0.598355
GSM1523846	0.489197	0.70546	0.797855	0.711514	0.725549	0.619702	0.425403	0.726985	0.507001	0.769307	0.837663	0.406345	0.381342	0.579392	0.743842	0.579959	0.662482	0.160962	0.766056	0.629822	0.625122	0.623558	0.406744	0.601629
GSM1523847	0.197948	0.742982	0.676293	0.736186	0.682341	0.703677	0.349458	0.658509	0.413232	0.758332	0.716424	0.522882	0.41063	0.474785	0.740011	0.538036	0.602931	0.235154	0.706644	0.576164	0.564777	0.603887	0.403165	0.58595
GSM1523848	0.702309	0.810554	0.943874	0.758012	0.713353	0.69541	0.465307	0.766776	0.682859	0.780461	0.933508	0.624601	0.488683	0.59979	0.791238	0.640603	0.732656	0.127582	0.764708	0.726888	0.729376	0.714829	0.432207	0.618815
GSM1523849	0.249434	0.724716	0.703754	0.6859	0.713094	0.619231	0.339205	0.762025	0.392612	0.770853	0.805689	0.363373	0.381237	0.562843	0.709669	0.570178	0.661447	0.287375	0.79519	0.708021	0.638357	0.611356	0.37183	0.613477
GSM1523850	0.385924	0.631716	0.720986	0.656064	0.693228	0.645094	0.428947	0.675351	0.419439	0.753278	0.697823	0.332664	0.341358	0.514713	0.723797	0.536106	0.645086	0.127795	0.765593	0.51729	0.596054	0.60663	0.381083	0.601158
GSM1523851	0.255626	0.791	0.745906	0.766766	0.704157	0.659293	0.329343	0.727922	0.46504	0.767741	0.797711	0.56795	0.379504	0.565557	0.736851	0.551254	0.634165	0.319432	0.760376	0.626023	0.556203	0.616289	0.455502	0.626537
GSM1523852	0.550175	0.680932	0.784241	0.701937	0.70098	0.634822	0.396551	0.749767	0.492658	0.767062	0.765216	0.411419	0.457785	0.530834	0.742415	0.490083	0.631388	0.386407	0.718823	0.568555	0.601283	0.601098	0.4822	0.566882
GSM1523853	0.269096	0.696057	0.648984	0.629058	0.717205	0.66431	0.365701	0.718131	0.366851	0.737783	0.624174	0.615505	0.281657	0.533499	0.687131	0.494494	0.570664	0.266712	0.734442	0.569533	0.549771	0.57223	0.439689	0.601549
GSM1523854	0.427174	0.730679	0.776261	0.705826	0.721601	0.646394	0.336724	0.801255	0.49824	0.758051	0.791949	0.444937	0.508329	0.509591	0.713336	0.570707	0.64493	0.30996	0.755167	0.690385	0.621545	0.620812	0.427235	0.627287
GSM1523855	0.207295	0.593179	0.600443	0.632458	0.706352	0.618257	0.411439	0.680695	0.264402	0.688111	0.622003	0.492301	0.469992	0.528885	0.711514	0.481523	0.562251	0.271355	0.714015	0.527192	0.565272	0.533314	0.415438	0.465101
GSM1523856	0.228347	0.728659	0.733552	0.690379	0.719762	0.6367	0.26858	0.749229	0.334591	0.802902	0.728229	0.478124	0.399824	0.514867	0.687645	0.562565	0.605773	0.184088	0.721892	0.609838	0.560406	0.601694	0.426863	0.659702
GSM1523857	0.260097	0.581679	0.642279	0.638437	0.691865	0.621496	0.328267	0.707555	0.363618	0.733689	0.671609	0.325526	0.387773	0.526733	0.681033	0.533289	0.611743	0.172472	0.736498	0.524134	0.578371	0.592378	0.44915	0.548138
GSM1523858	0.305516	0.425428	0.599739	0.57858	0.633441	0.551775	0.377399	0.626364	0.365008	0.706941	0.617882	0.252859	0.352988	0.668567	0.690003	0.522511	0.637895	0.0560592	0.747185	0.544769	0.561886	0.604822	0.337725	0.5505
GSM1523859	0.30979	0.681045	0.609327	0.684959	0.696693	0.692499	0.301751	0.681425	0.397725	0.768693	0.676563	0.597593	0.395266	0.482029	0.753139	0.544211	0.613497	0.184912	0.752391	0.584869	0.587147	0.59966	0.457816	0.530674
GSM1523860	0.309654	0.749315	0.760688	0.759914	0.711969	0.64459	0.339576	0.732785	0.421977	0.759233	0.793549	0.600104	0.402507	0.518904	0.757172	0.588121	0.657857	0.241313	0.703538	0.627095	0.59248	0.622001	0.436396	0.554977
GSM1523861	0.271753	0.721724	0.738702	0.68719	0.732121	0.637442	0.417739	0.778253	0.432289	0.751365	0.757842	0.511449	0.365237	0.552151	0.704436	0.51951	0.605632	0.367761	0.757867	0.622462	0.581137	0.571493	0.430581	0.640093
GSM1523862	0.557823	0.590719	0.741689	0.657403	0.656867	0.575281	0.393979	0.669332	0.539899	0.7283	0.767993	0.318566	0.328423	0.53477	0.721714	0.540936	0.66351	0.0834845	0.744492	0.582775	0.61077	0.6272	0.395487	0.61315
GSM1523863	0.283312	0.797273	0.861124	0.762263	0.732024	0.644773	0.352181	0.730327	0.481236	0.73454	0.853413	0.465802	0.383513	0.52416	0.739243	0.578962	0.68127	0.203162	0.734215	0.650425	0.602642	0.626531	0.461513	0.649159
GSM1523864	0.228811	0.689048	0.627974	0.688797	0.686237	0.697782	0.268197	0.648298	0.329448	0.722063	0.656607	0.468071	0.300087	0.453015	0.719945	0.487102	0.585359	0.209085	0.712197	0.522846	0.519864	0.53932	0.478653	0.593589
GSM1523865	0.252237	0.690443	0.657325	0.658066	0.652807	0.653404	0.262996	0.715161	0.339949	0.724544	0.659074	0.397719	0.348232	0.413395	0.704363	0.534268	0.604925	0.196648	0.711928	0.548029	0.530487	0.539469	0.340298	0.500655
GSM1523866	0.561408	0.750302	0.776756	0.70204	0.699515	0.634433	0.371475	0.763701	0.534673	0.782799	0.855528	0.458303	0.428869	0.63773	0.73735	0.600907	0.640819	0.144758	0.794965	0.712511	0.661559	0.682023	0.428891	0.656367
GSM1523867	0.376814	0.725969	0.707183	0.697439	0.708267	0.669069	0.395022	0.759931	0.392889	0.750841	0.74018	0.341075	0.355393	0.529802	0.728245	0.498309	0.578191	0.289609	0.742599	0.569671	0.573157	0.577206	0.438043	0.621489
GSM1523868	0.361181	0.813726	0.817751	0.779894	0.700062	0.658595	0.457447	0.780056	0.585908	0.802515	0.86361	0.531512	0.463371	0.608447	0.804062	0.58593	0.703261	0.455157	0.796628	0.703965	0.64751	0.630797	0.468552	0.659382
GSM1523869	0.379126	0.682302	0.654182	0.755359	0.720902	0.657735	0.424456	0.707766	0.432316	0.756669	0.726856	0.429523	0.353098	0.577316	0.743067	0.517588	0.611091	0.379114	0.748792	0.558447	0.593537	0.589288	0.441402	0.561846
GSM1523870	0.276697	0.772952	0.731393	0.692794	0.674208	0.625826	0.25829	0.702412	0.417288	0.732185	0.668133	0.421888	0.337872	0.445071	0.716636	0.54951	0.578844	0.0760324	0.701427	0.55559	0.513109	0.597187	0.420957	0.600892
GSM1523871	0.33196	0.746411	0.695316	0.700305	0.701385	0.66156	0.346532	0.737748	0.402666	0.754614	0.70328	0.44555	0.376197	0.527654	0.727673	0.539363	0.593596	0.155936	0.725981	0.581636	0.575345	0.578334	0.4212	0.59961
GSM1523872	0.466565	0.683594	0.736121	0.765243	0.69371	0.676907	0.399817	0.744172	0.508452	0.802727	0.870523	0.41484	0.360091	0.56582	0.748103	0.596357	0.669632	0.250988	0.800709	0.714294	0.657337	0.614688	0.448672	0.577143
GSM1523873	0.701694	0.821363	0.876551	0.740699	0.748045	0.701782	0.325645	0.744353	0.602552	0.787725	0.919692	0.613933	0.563265	0.512366	0.772424	0.586977	0.672869	0.131635	0.730608	0.688808	0.649688	0.619895	0.409355	0.603442
GSM1523874	0.177665	0.699233	0.624984	0.7612	0.671842	0.715696	0.273763	0.761723	0.417453	0.716933	0.736811	0.608831	0.3212	0.538758	0.748894	0.541323	0.638813	0.343536	0.772007	0.666771	0.632704	0.600024	0.422668	0.550061
GSM1523875	0.143107	0.699045	0.572137	0.577267	0.680623	0.619011	0.241472	0.62639	0.27804	0.674172	0.630461	0.656628	0.372423	0.433699	0.711637	0.464273	0.518361	0.126623	0.697866	0.449944	0.501704	0.484818	0.393522	0.592895
GSM1523876	0.279478	0.706165	0.704014	0.726196	0.696277	0.670649	0.308332	0.717072	0.377029	0.734538	0.697227	0.448682	0.304073	0.457978	0.737805	0.519207	0.592438	0.227215	0.692056	0.546806	0.524338	0.589116	0.442017	0.640531
GSM1523877	0.108484	0.612712	0.519359	0.612203	0.603975	0.707383	0.257026	0.624115	0.260541	0.669588	0.586895	0.59878	0.28696	0.464313	0.739683	0.430101	0.548832	0.174971	0.699183	0.47402	0.50765	0.495782	0.454043	0.579089
GSM1523878	0.475116	0.75532	0.815778	0.734568	0.72019	0.664638	0.408073	0.726917	0.481279	0.757848	0.812919	0.461632	0.38492	0.525151	0.74009	0.530486	0.638068	0.292228	0.725655	0.607664	0.596268	0.590563	0.436375	0.606369
GSM1523879	0.277473	0.681709	0.678173	0.657054	0.683959	0.637375	0.35223	0.713905	0.396686	0.710707	0.658492	0.358815	0.317122	0.439408	0.753375	0.472016	0.578562	0.263056	0.757927	0.542992	0.569793	0.527289	0.384066	0.527245
GSM1523880	0.513257	0.808529	0.807819	0.710698	0.673572	0.665605	0.382458	0.704585	0.49948	0.72492	0.768243	0.501351	0.404601	0.490152	0.719955	0.515759	0.626621	0.258256	0.721722	0.58327	0.564135	0.604153	0.456976	0.637324
GSM1523881	0.196481	0.63615	0.622418	0.692599	0.670565	0.67184	0.345327	0.687238	0.287223	0.712673	0.699041	0.394235	0.311302	0.514634	0.724319	0.518702	0.627444	0.210794	0.708069	0.505848	0.514339	0.563944	0.457738	0.552715
GSM1523882	0.243627	0.791957	0.735154	0.699894	0.690195	0.661627	0.349634	0.675001	0.428939	0.729061	0.785067	0.555119	0.584434	0.430709	0.69197	0.523257	0.585507	0.218025	0.684557	0.590971	0.561479	0.554695	0.419281	0.621358
GSM1523883	0.33245	0.745023	0.780836	0.704227	0.681227	0.657273	0.351521	0.690128	0.400624	0.719289	0.761411	0.486315	0.395305	0.444003	0.735936	0.526395	0.601234	0.221309	0.704541	0.58117	0.559633	0.56351	0.469407	0.590657
GSM1523884	0.477064	0.704631	0.661751	0.700875	0.70127	0.643539	0.487068	0.738211	0.440017	0.771937	0.802109	0.373245	0.391409	0.650459	0.758512	0.567174	0.623512	0.295683	0.743662	0.600513	0.607167	0.619813	0.435958	0.603842
GSM1523885	0.233995	0.779597	0.811283	0.7571	0.709645	0.657352	0.381851	0.703262	0.47479	0.765773	0.800592	0.430116	0.410258	0.536237	0.734934	0.550726	0.63623	0.320336	0.70706	0.570224	0.57342	0.616491	0.447495	0.628487
GSM1523886	0.41754	0.741121	0.76199	0.792075	0.729612	0.640237	0.471619	0.754194	0.515171	0.797629	0.878735	0.76941	0.548395	0.718855	0.740917	0.614082	0.674856	0.369718	0.842449	0.730254	0.66503	0.687828	0.481728	0.64334
GSM1523887	0.388956	0.752721	0.769519	0.756714	0.695012	0.694622	0.291985	0.682806	0.450337	0.733921	0.829464	0.84328	0.422038	0.529206	0.716724	0.610291	0.646786	0.256985	0.719448	0.635127	0.638809	0.598204	0.491532	0.530406
GSM1523888	0.425338	0.837708	0.884006	0.73414	0.703695	0.655269	0.385067	0.738137	0.48596	0.746477	0.879262	0.447535	0.424437	0.475619	0.734973	0.594586	0.699021	0.128252	0.726215	0.642845	0.621182	0.653611	0.428361	0.632827
GSM1523889	0.22211	0.631787	0.631582	0.653524	0.711832	0.645476	0.262011	0.653032	0.275597	0.727325	0.595633	0.385628	0.30056	0.440301	0.725989	0.460734	0.553195	0.201971	0.621625	0.44962	0.491283	0.529477	0.436742	0.608328
GSM1523890	0.439799	0.648561	0.683497	0.728561	0.712052	0.654288	0.420258	0.713954	0.407718	0.777293	0.770627	0.328731	0.41938	0.541767	0.753381	0.508722	0.606379	0.162945	0.723164	0.531805	0.58006	0.550924	0.426797	0.568478
GSM1523891	0.269655	0.710787	0.614989	0.811221	0.747999	0.652866	0.436281	0.825329	0.423285	0.816234	0.868428	0.457115	0.55231	0.729847	0.750399	0.635508	0.667385	0.499426	0.843818	0.753819	0.663216	0.610475	0.371154	0.576317
GSM1523892	0.515862	0.738879	0.744282	0.70861	0.714247	0.686657	0.385214	0.730905	0.47069	0.781152	0.767537	0.356894	0.308233	0.563734	0.721398	0.589964	0.649165	0.232618	0.722198	0.644865	0.624687	0.591789	0.503901	0.55834
GSM1523893	0.245448	0.648052	0.660616	0.651835	0.667925	0.62114	0.380782	0.673438	0.338542	0.717045	0.637764	0.433682	0.416254	0.458294	0.720078	0.495369	0.574829	0.207886	0.707159	0.567936	0.53576	0.536816	0.398251	0.555388
GSM1523894	0.203581	0.669747	0.598969	0.67759	0.642121	0.662974	0.242008	0.701227	0.312765	0.710005	0.603869	0.613962	0.335458	0.48019	0.712141	0.539019	0.604798	0.334765	0.686548	0.500379	0.528967	0.528069	0.458087	0.59477
GSM1523895	0.210224	0.761804	0.664906	0.668828	0.653885	0.642185	0.262427	0.696475	0.321497	0.677838	0.656205	0.468413	0.345717	0.472611	0.755314	0.537276	0.551143	0.176255	0.685561	0.542161	0.547351	0.505567	0.352727	0.598798
GSM1523896	0.510292	0.714743	0.818223	0.737486	0.706021	0.644604	0.334791	0.775679	0.539601	0.71979	0.825478	0.38002	0.35874	0.520806	0.756977	0.581147	0.651941	0.19165	0.777806	0.655021	0.619805	0.608827	0.386012	0.590841
GSM1523897	0.187818	0.69374	0.570431	0.636284	0.634918	0.669564	0.213685	0.644821	0.353258	0.723564	0.579011	0.482182	0.395126	0.426584	0.743862	0.534699	0.553667	0.106619	0.75812	0.441769	0.511167	0.510918	0.426012	0.627726
GSM1523898	0.18446	0.645502	0.667176	0.649037	0.685259	0.614602	0.400632	0.732034	0.308749	0.719653	0.650336	0.454291	0.420962	0.486701	0.702804	0.483633	0.557804	0.243689	0.689547	0.567744	0.505715	0.525664	0.432507	0.482307
GSM1523899	0.263535	0.657145	0.749999	0.686895	0.716078	0.717283	0.33074	0.697677	0.340141	0.666948	0.643124	0.530085	0.324141	0.494047	0.740426	0.544113	0.573633	0.0318844	0.723569	0.462113	0.534824	0.549358	0.496439	0.56942
GSM1523901	0.235877	0.765801	0.786071	0.733118	0.707392	0.661747	0.299367	0.754111	0.420773	0.760671	0.781775	0.485101	0.410174	0.510521	0.711116	0.580673	0.643639	0.217586	0.708275	0.62709	0.598978	0.61301	0.458825	0.616492
GSM1523903	0.133865	0.655527	0.630306	0.664005	0.698473	0.638882	0.237792	0.639897	0.28374	0.740188	0.621143	0.310518	0.341982	0.438759	0.690332	0.527378	0.545034	0.0800502	0.699613	0.491677	0.515219	0.548065	0.432087	0.621234
GSM1523904	0.365766	0.717783	0.729386	0.680917	0.726269	0.679984	0.395554	0.723946	0.435027	0.796249	0.766642	0.341896	0.340271	0.606226	0.698961	0.546277	0.602223	0.144635	0.711271	0.603508	0.601336	0.586892	0.43142	0.590785
GSM1523905	0.262041	0.673596	0.626141	0.682011	0.660267	0.632263	0.359822	0.693313	0.386811	0.742284	0.721679	0.337539	0.329461	0.465561	0.718252	0.543758	0.600354	0.24352	0.733726	0.551265	0.570618	0.575812	0.425155	0.6026
GSM1523906	0.792096	0.847832	0.885319	0.723099	0.719752	0.64105	0.432924	0.737012	0.69996	0.767084	0.886163	0.449063	0.425848	0.636954	0.782635	0.589206	0.679119	0.159051	0.784452	0.68751	0.669268	0.662924	0.429305	0.625283
GSM1523908	0.338114	0.770329	0.757681	0.745928	0.703205	0.653951	0.337717	0.754178	0.525602	0.786139	0.822484	0.485495	0.501439	0.58439	0.726887	0.667188	0.64108	0.254258	0.775728	0.674191	0.636288	0.608529	0.467745	0.601639
GSM1523909	0.301114	0.808237	0.855855	0.751333	0.684335	0.660396	0.300913	0.757574	0.453314	0.770113	0.786876	0.526456	0.409351	0.508025	0.734035	0.599529	0.670542	0.147354	0.726466	0.641695	0.573724	0.645237	0.449591	0.579521
GSM1523910	0.310916	0.799255	0.818022	0.735767	0.645348	0.652118	0.27	0.700708	0.415601	0.752008	0.747289	0.471135	0.410572	0.528597	0.72278	0.543013	0.614173	0.208038	0.712985	0.599561	0.539054	0.596532	0.443169	0.584889
GSM1523911	0.17558	0.680348	0.648965	0.703692	0.718037	0.679969	0.253871	0.734985	0.400422	0.744078	0.653682	0.456669	0.477167	0.508173	0.737409	0.550703	0.607271	0.243208	0.723653	0.560782	0.533957	0.565849	0.444101	0.521478
GSM1523918	0.307139	0.572222	0.6148	0.6542	0.675495	0.641049	0.279709	0.665305	0.36876	0.740038	0.716111	0.413117	0.367255	0.518802	0.687552	0.575099	0.618073	0.0256567	0.73646	0.574643	0.569408	0.58301	0.377266	0.597831
GSM1523919	0.544624	0.629007	0.722904	0.679548	0.727537	0.659267	0.31365	0.744401	0.452054	0.751104	0.715241	0.445615	0.361364	0.567811	0.743876	0.527636	0.584251	0.280489	0.744155	0.557913	0.601406	0.595277	0.464808	0.539581
GSM1523920	0.413538	0.530168	0.70803	0.68338	0.745191	0.624727	0.451393	0.729734	0.482486	0.802201	0.781593	0.372958	0.299509	0.487624	0.748058	0.512093	0.60107	0.164638	0.755288	0.629278	0.588891	0.563768	0.427497	0.535546
GSM1523921	0.317661	0.713517	0.731639	0.721607	0.6983	0.658454	0.294005	0.691583	0.386913	0.747209	0.746396	0.418953	0.451736	0.446645	0.730101	0.551613	0.634146	0.326945	0.754556	0.618354	0.579539	0.593809	0.397319	0.593874
GSM1523922	0.141763	0.707516	0.613434	0.742749	0.684901	0.674994	0.447396	0.693596	0.396254	0.77048	0.778428	0.409795	0.538937	0.582549	0.75189	0.536982	0.617537	0.41809	0.800782	0.614007	0.601579	0.589424	0.418637	0.57965
GSM1523923	0.331463	0.699223	0.659061	0.703225	0.674991	0.654855	0.402353	0.752209	0.35199	0.748657	0.696994	0.414153	0.339456	0.520528	0.731311	0.531984	0.572329	0.332432	0.71006	0.561983	0.595527	0.555326	0.453051	0.556139
GSM1523924	0.408731	0.617485	0.755378	0.699005	0.729345	0.653761	0.360367	0.710948	0.469546	0.763192	0.704589	0.319566	0.355927	0.480699	0.727855	0.521887	0.595186	0.149741	0.765032	0.556718	0.594426	0.575273	0.419221	0.591582
GSM1523925	0.351971	0.69232	0.638508	0.653505	0.687872	0.659778	0.29851	0.707559	0.334163	0.821853	0.677481	0.435848	0.320063	0.490158	0.751691	0.532269	0.577236	0.22266	0.725683	0.531148	0.563192	0.526087	0.39753	0.52842
GSM1523926	0.29416	0.624104	0.553328	0.676856	0.687536	0.672818	0.338057	0.675155	0.314911	0.667845	0.530586	0.388783	0.369601	0.389657	0.722019	0.505941	0.545561	0.154982	0.669658	0.42682	0.455703	0.498032	0.442386	0.548975
GSM1523927	0.372848	0.595086	0.623391	0.670731	0.690098	0.641527	0.400251	0.758034	0.39222	0.742807	0.710054	0.362131	0.390372	0.606106	0.760466	0.516422	0.565709	0.279583	0.73222	0.591164	0.599718	0.590065	0.462967	0.571097
GSM1523928	0.140776	0.651701	0.526519	0.673073	0.637315	0.689714	0.298655	0.661237	0.28983	0.730617	0.696467	0.496237	0.583139	0.431706	0.771718	0.557473	0.584829	0.155924	0.714499	0.591938	0.571411	0.56313	0.403684	0.543077
GSM1523929	0.447866	0.745595	0.731105	0.719925	0.680999	0.69009	0.291124	0.75063	0.478219	0.764276	0.79547	0.471321	0.449103	0.505037	0.74594	0.570417	0.630053	0.288277	0.733146	0.581969	0.583331	0.601541	0.428893	0.584426
GSM1523930	0.251381	0.612393	0.582141	0.681572	0.672031	0.696486	0.368342	0.715048	0.318854	0.727107	0.691048	0.545527	0.395297	0.517269	0.816578	0.589229	0.649408	0.223997	0.755584	0.495697	0.571902	0.567351	0.429312	0.543034
GSM1523931	0.736747	0.78283	0.896248	0.755946	0.734619	0.693105	0.375985	0.743824	0.647729	0.784432	0.909574	0.518569	0.629701	0.500434	0.771349	0.577329	0.653748	0.117196	0.766033	0.652537	0.646312	0.653113	0.439278	0.578039
GSM1523932	0.299153	0.654925	0.607311	0.678815	0.6683	0.665931	0.35532	0.727053	0.358683	0.7035	0.614016	0.420105	0.294468	0.464299	0.731885	0.477852	0.56972	0.196628	0.707203	0.526469	0.53821	0.517281	0.400604	0.484364
GSM1523933	0.307028	0.750862	0.68373	0.718472	0.718099	0.668927	0.263776	0.709403	0.365201	0.789081	0.771572	0.690789	0.517798	0.616038	0.72913	0.590375	0.640468	0.301493	0.741825	0.591835	0.61977	0.578769	0.444984	0.570142
GSM1523934	0.274173	0.61317	0.534345	0.698332	0.650372	0.718393	0.241008	0.653858	0.310513	0.727527	0.583817	0.373054	0.301066	0.40487	0.740347	0.533026	0.585772	0.154922	0.757404	0.488347	0.541696	0.547979	0.369793	0.548073
GSM1523935	0.381394	0.661522	0.629887	0.770679	0.722217	0.659838	0.520013	0.793797	0.484498	0.791935	0.876099	0.466917	0.483806	0.67504	0.758051	0.628202	0.672783	0.439761	0.872328	0.76339	0.66846	0.675055	0.381024	0.622264
GSM1523936	0.440164	0.61248	0.698032	0.734109	0.720122	0.653655	0.398132	0.718533	0.411085	0.795945	0.788414	0.337782	0.374541	0.534123	0.729845	0.558133	0.618477	0.211541	0.75684	0.600778	0.619278	0.61865	0.429708	0.598323
GSM1523937	0.350106	0.66442	0.698477	0.792832	0.689254	0.662553	0.441161	0.725418	0.4557	0.80331	0.870834	0.418125	0.398747	0.544175	0.763613	0.562342	0.632147	0.485945	0.784768	0.652586	0.612368	0.594287	0.452846	0.531466
GSM1523938	0.308178	0.566497	0.663614	0.652413	0.699189	0.616358	0.419498	0.66179	0.373821	0.719807	0.682374	0.332132	0.363706	0.56163	0.719308	0.588025	0.616113	0.0522348	0.751154	0.557814	0.623749	0.612791	0.434365	0.582857
GSM1523939	0.569682	0.494896	0.693662	0.657037	0.688827	0.615521	0.370216	0.689978	0.469992	0.727792	0.769317	0.338747	0.301404	0.658748	0.716228	0.544553	0.672589	0.131006	0.783342	0.620527	0.624172	0.625532	0.410988	0.540723
GSM1523940	0.263182	0.636915	0.568749	0.640001	0.689847	0.696049	0.265257	0.681445	0.29426	0.719194	0.568111	0.205944	0.337343	0.395368	0.690795	0.504217	0.569261	0.0850744	0.693702	0.460212	0.52877	0.541412	0.393932	0.553997
GSM1523941	0.440591	0.758157	0.886368	0.706268	0.707998	0.683316	0.367943	0.744123	0.468333	0.753132	0.797779	0.556606	0.500123	0.494866	0.78663	0.578745	0.642298	0.147607	0.739023	0.640707	0.604357	0.635582	0.43093	0.620158
GSM1523942	0.255734	0.650939	0.58721	0.688639	0.699501	0.709019	0.301103	0.711732	0.326395	0.769341	0.666928	0.456924	0.337161	0.514424	0.739423	0.559407	0.595428	0.225511	0.73338	0.517533	0.551159	0.575814	0.410239	0.58112
GSM1523943	0.205042	0.675369	0.682661	0.716119	0.679558	0.648549	0.393949	0.72864	0.421916	0.766544	0.711519	0.41527	0.305732	0.506046	0.753138	0.544956	0.605853	0.266959	0.710456	0.537895	0.556055	0.548066	0.425294	0.568545
GSM1523944	0.63681	0.770706	0.844721	0.773677	0.791997	0.628075	0.324572	0.713882	0.5391	0.774419	0.845801	0.645993	0.532899	0.52258	0.797551	0.578955	0.60358	0.19659	0.7461	0.702197	0.610802	0.609084	0.486601	0.566952
GSM1523945	0.231872	0.694545	0.644569	0.762317	0.721974	0.662917	0.450165	0.769364	0.37501	0.799344	0.881716	0.42258	0.445105	0.658963	0.744943	0.593264	0.66249	0.269066	0.820065	0.74767	0.630666	0.607314	0.426259	0.566015
GSM1523946	0.226088	0.713896	0.675655	0.771183	0.708473	0.687692	0.411595	0.758793	0.358291	0.782845	0.761953	0.416195	0.310412	0.522063	0.757183	0.541938	0.627474	0.512499	0.762497	0.582206	0.608486	0.563917	0.373474	0.632229
GSM1523947	0.291822	0.798335	0.744342	0.696365	0.658908	0.652057	0.361913	0.709739	0.365312	0.693313	0.693165	0.562529	0.417306	0.497434	0.735466	0.563162	0.606124	0.124189	0.689932	0.554759	0.529582	0.571054	0.452883	0.563227
GSM1523948	0.242048	0.570904	0.670738	0.703306	0.72138	0.668626	0.375572	0.694932	0.352175	0.758151	0.757961	0.494099	0.35628	0.63801	0.750094	0.533142	0.60352	0.279138	0.785829	0.58739	0.577203	0.575756	0.419027	0.56456
GSM1523949	0.461177	0.579947	0.732532	0.652583	0.699918	0.631475	0.44931	0.663258	0.471132	0.726419	0.782986	0.26954	0.35293	0.61466	0.737634	0.536142	0.660196	0.14235	0.734631	0.53787	0.609884	0.627778	0.438252	0.553568
GSM1523950	0.147298	0.699809	0.596698	0.64386	0.659091	0.636817	0.241402	0.692386	0.32261	0.655239	0.552108	0.417795	0.318917	0.346456	0.690222	0.505711	0.525586	0.149666	0.673497	0.416929	0.478059	0.482673	0.371005	0.52083
GSM1523951	0.709894	0.758948	0.852181	0.728879	0.723068	0.65319	0.331012	0.703721	0.650121	0.757717	0.915049	0.461817	0.507826	0.484189	0.77166	0.5938	0.676903	0.133673	0.783056	0.661549	0.635863	0.642743	0.43871	0.582095
GSM1523952	0.475938	0.741603	0.762675	0.730275	0.728477	0.676404	0.384117	0.734647	0.447889	0.792357	0.808803	0.386741	0.334699	0.603529	0.74619	0.564448	0.584358	0.247124	0.803211	0.59892	0.579719	0.615923	0.435737	0.652494
GSM1523953	0.225155	0.631697	0.526193	0.566504	0.684689	0.661971	0.312809	0.610678	0.232249	0.716908	0.445534	0.174362	0.352401	0.532538	0.661808	0.430078	0.483377	0.0907474	0.692345	0.409011	0.489455	0.451887	0.360008	0.538332
GSM1523954	0.241078	0.389198	0.551082	0.608518	0.671651	0.662787	0.299614	0.661371	0.292651	0.706961	0.456263	0.303884	0.378746	0.340056	0.74721	0.430061	0.562461	0.233481	0.678065	0.396377	0.493881	0.514306	0.416995	0.486729
GSM1523955	0.469751	0.52177	0.723012	0.614682	0.715461	0.641211	0.426797	0.646915	0.361074	0.727149	0.650166	0.218925	0.287644	0.496529	0.740513	0.446167	0.578252	0.0723554	0.750822	0.427576	0.515094	0.55148	0.46423	0.547034
GSM1523956	0.189781	0.723235	0.578998	0.657176	0.708941	0.674153	0.221073	0.668759	0.29551	0.692492	0.621189	0.478347	0.304299	0.495773	0.718961	0.519623	0.525528	0.247345	0.735984	0.522084	0.515873	0.514145	0.481244	0.630974
GSM1523957	0.217743	0.606623	0.48474	0.607536	0.701964	0.699264	0.343233	0.643413	0.278914	0.72572	0.484179	0.151944	0.310823	0.463365	0.724489	0.487027	0.529207	0.0987993	0.653065	0.321678	0.493937	0.5121	0.408883	0.55984
GSM1523958	0.551804	0.713142	0.823357	0.741317	0.754829	0.653465	0.386156	0.781671	0.521784	0.813709	0.845139	0.461835	0.415613	0.581852	0.743672	0.55926	0.643426	0.264032	0.77097	0.63324	0.636362	0.640174	0.473467	0.635441
GSM1523959	0.191517	0.681465	0.540141	0.636545	0.684136	0.676133	0.386115	0.678146	0.293159	0.728218	0.576173	0.302826	0.281566	0.510996	0.674763	0.484558	0.533881	0.278887	0.698226	0.438442	0.508754	0.515691	0.415717	0.539395
GSM1523960	0.122802	0.591874	0.485939	0.618217	0.667905	0.676902	0.320243	0.683006	0.24453	0.711614	0.483468	0.388345	0.272603	0.416768	0.707481	0.501607	0.555681	0.236138	0.72447	0.384403	0.532456	0.523847	0.3159	0.545802
GSM1523961	0.251117	0.677091	0.575332	0.659858	0.637086	0.68655	0.256607	0.662688	0.310582	0.699606	0.558677	0.489248	0.309606	0.379342	0.725279	0.51449	0.553991	0.23915	0.740813	0.406513	0.503528	0.547294	0.393675	0.56902
GSM1523962	0.600802	0.577244	0.659401	0.653404	0.674087	0.631238	0.399326	0.705789	0.492828	0.747839	0.750196	0.263403	0.330357	0.587751	0.753988	0.539037	0.628246	0.267383	0.762377	0.577936	0.617519	0.607787	0.42613	0.545782
GSM1523963	0.24251	0.610142	0.664699	0.716005	0.711467	0.663954	0.308988	0.703738	0.334373	0.794807	0.704691	0.364503	0.279104	0.467354	0.713595	0.502081	0.561699	0.128858	0.72794	0.522675	0.545172	0.557371	0.453887	0.553403
GSM1523964	0.23897	0.648691	0.643232	0.643821	0.662821	0.658726	0.188855	0.643219	0.328356	0.680675	0.561251	0.369677	0.319594	0.357432	0.732899	0.479436	0.576242	0.122584	0.697346	0.42483	0.493174	0.555646	0.417025	0.592081
GSM1523965	0.313476	0.794622	0.686464	0.774174	0.755973	0.677737	0.49902	0.782073	0.441117	0.819179	0.864486	0.675149	0.447231	0.820603	0.7714	0.617365	0.652051	0.40529	0.855184	0.729732	0.672251	0.656564	0.484384	0.672096
GSM1523966	0.566781	0.718461	0.701237	0.665804	0.694815	0.647317	0.442333	0.697826	0.465049	0.727398	0.682137	0.422393	0.331324	0.514626	0.750003	0.506613	0.547948	0.123738	0.718401	0.562647	0.579049	0.568572	0.369769	0.59096
GSM1523967	0.612626	0.717081	0.758331	0.69727	0.709524	0.643986	0.474848	0.696071	0.513858	0.765505	0.773858	0.357389	0.406296	0.508775	0.745859	0.48248	0.619568	0.199225	0.756079	0.581106	0.571459	0.578401	0.423183	0.620432
GSM1523968	0.221245	0.479567	0.627882	0.621174	0.646323	0.618142	0.39403	0.662513	0.345874	0.758821	0.687466	0.284991	0.423271	0.56364	0.696187	0.522385	0.620806	0.0389568	0.75881	0.529969	0.607366	0.603955	0.375548	0.52719
GSM1523969	0.462459	0.515878	0.664662	0.640917	0.667406	0.636832	0.357996	0.694369	0.391114	0.736816	0.649753	0.262687	0.262228	0.440419	0.734738	0.463147	0.577132	0.199082	0.735415	0.483097	0.563902	0.587951	0.405568	0.54065
GSM1523970	0.154902	0.613557	0.491442	0.618726	0.711598	0.701428	0.232674	0.643193	0.283158	0.67934	0.448989	0.2816	0.34672	0.47132	0.719234	0.499654	0.525392	0.184038	0.711618	0.43148	0.483405	0.512677	0.455505	0.516377
GSM1523971	0.732251	0.562165	0.712643	0.676115	0.695177	0.630846	0.428174	0.635114	0.509037	0.750086	0.747678	0.260549	0.398262	0.637139	0.736015	0.52063	0.656646	0.0691155	0.753291	0.569393	0.618494	0.60504	0.43666	0.485898
GSM1523972	0.21043	0.595626	0.553902	0.703049	0.689359	0.70941	0.221045	0.662548	0.347084	0.770449	0.715579	0.492689	0.37809	0.446121	0.814165	0.574572	0.592815	0.103552	0.771905	0.536294	0.579707	0.519313	0.384646	0.463472
GSM1523973	0.222196	0.652791	0.622009	0.693296	0.718768	0.646901	0.437995	0.687945	0.326049	0.775679	0.721912	0.32675	0.393343	0.62314	0.72294	0.548209	0.601579	0.16386	0.749122	0.541317	0.558127	0.565832	0.426844	0.61517
GSM1523974	0.145702	0.613858	0.523667	0.582272	0.731766	0.625623	0.262362	0.654755	0.2277	0.73706	0.592744	0.484505	0.412786	0.336945	0.709464	0.468386	0.518766	0.293072	0.712999	0.403567	0.502357	0.523445	0.377053	0.588928
GSM1523975	0.68202	0.775413	0.921635	0.737371	0.685039	0.643399	0.335835	0.729773	0.628241	0.744959	0.866378	0.458407	0.519541	0.459688	0.780783	0.601652	0.678409	0.0577347	0.758163	0.660723	0.669022	0.640909	0.418801	0.592265
GSM1523976	0.315766	0.635396	0.597115	0.704702	0.682527	0.68031	0.307008	0.6648	0.358171	0.726797	0.58232	0.379383	0.234202	0.43893	0.715211	0.487233	0.568086	0.187872	0.696645	0.479972	0.551632	0.548698	0.464584	0.589163
GSM1523977	0.185365	0.619249	0.493778	0.599598	0.65308	0.662451	0.279929	0.706801	0.267469	0.744931	0.572182	0.275519	0.462594	0.378132	0.742367	0.499705	0.57699	0.163605	0.678443	0.466716	0.511148	0.465511	0.376817	0.523556
GSM1523978	0.197763	0.672095	0.685179	0.718337	0.702572	0.682335	0.46926	0.729371	0.368803	0.728297	0.740989	0.609252	0.392693	0.558087	0.767293	0.509655	0.588763	0.221143	0.770702	0.579487	0.591529	0.549339	0.493213	0.548645
GSM1523979	0.256038	0.797674	0.784088	0.676237	0.739287	0.654032	0.275082	0.708755	0.344857	0.710759	0.748761	0.424536	0.455272	0.495828	0.699746	0.584979	0.599595	0.133841	0.708375	0.573964	0.557417	0.603824	0.43251	0.638656
GSM1523980	0.805776	0.739921	0.830751	0.734052	0.73967	0.651775	0.485354	0.737856	0.674823	0.821049	0.868807	0.451443	0.377029	0.561286	0.778762	0.576756	0.612347	0.286583	0.781975	0.63727	0.640939	0.657512	0.46491	0.618059
GSM1523981	0.338182	0.702216	0.714199	0.760825	0.702716	0.650739	0.482789	0.817754	0.460439	0.816885	0.901732	0.521725	0.593131	0.688829	0.780504	0.659474	0.684237	0.380209	0.856143	0.782041	0.696293	0.66352	0.399848	0.623276
GSM1523982	0.355137	0.646765	0.74364	0.842224	0.711302	0.662728	0.473982	0.826909	0.471127	0.836703	0.968833	0.447145	0.576614	0.750775	0.793377	0.6727	0.685657	0.517507	0.875118	0.884765	0.733421	0.699367	0.412203	0.586459
GSM1523983	0.253128	0.752431	0.69233	0.716402	0.674235	0.632651	0.369786	0.690608	0.382454	0.725202	0.728872	0.427098	0.247039	0.513215	0.724095	0.515422	0.594837	0.228826	0.716067	0.572237	0.490583	0.578865	0.426461	0.54954
GSM1523984	0.189969	0.651069	0.581457	0.586094	0.612735	0.62253	0.289753	0.655057	0.241108	0.672527	0.562695	0.197182	0.253943	0.41389	0.668365	0.42376	0.446299	0.03092	0.653568	0.479109	0.510527	0.500918	0.304258	0.65594
GSM1523985	0.437319	0.753012	0.779852	0.697676	0.70426	0.698849	0.380103	0.720594	0.401005	0.785128	0.798161	0.514371	0.371124	0.499593	0.748174	0.538305	0.628478	0.233877	0.74543	0.559872	0.595705	0.617317	0.419222	0.638465
GSM1523986	0.587861	0.646013	0.828364	0.732176	0.728985	0.666491	0.376258	0.786657	0.578711	0.781244	0.855802	0.39508	0.382173	0.621984	0.807334	0.55316	0.670639	0.232675	0.778831	0.659794	0.654476	0.641155	0.437378	0.593891
GSM1523987	0.656012	0.702252	0.786558	0.677336	0.69304	0.680756	0.439904	0.68091	0.536598	0.765778	0.744894	0.336546	0.381015	0.456549	0.751671	0.486286	0.577202	0.127701	0.734785	0.510301	0.59469	0.589304	0.424363	0.564554
GSM1523988	0.401687	0.566303	0.756149	0.637806	0.651019	0.577795	0.284283	0.651586	0.444372	0.75806	0.697111	0.356728	0.370863	0.449106	0.699237	0.542419	0.608458	0.0778546	0.767424	0.605315	0.584367	0.616665	0.327997	0.586137
GSM1523989	0.419672	0.66492	0.7182	0.706283	0.698488	0.657662	0.451269	0.744515	0.490342	0.778803	0.802256	0.371788	0.385129	0.556768	0.74913	0.563265	0.597604	0.124504	0.791348	0.625958	0.62623	0.616354	0.427634	0.616925
GSM1523990	0.217358	0.55135	0.547139	0.658558	0.737403	0.669982	0.258787	0.684324	0.303173	0.760316	0.64605	0.274953	0.552027	0.468256	0.699622	0.546684	0.59017	0	0.756093	0.548732	0.572577	0.527833	0.39374	0.520379
GSM1523991	0.226511	0.591884	0.714544	0.663457	0.713519	0.664779	0.31863	0.665002	0.304935	0.715772	0.546605	0.43931	0.350474	0.501835	0.725257	0.498715	0.597656	0.143457	0.713644	0.43109	0.52547	0.553304	0.428786	0.618071
GSM1523992	0.241621	0.524134	0.618774	0.660385	0.668479	0.652725	0.318054	0.690738	0.282309	0.721841	0.53875	0.344725	0.347474	0.366185	0.729906	0.4613	0.564887	0.198706	0.719642	0.427192	0.523903	0.542779	0.452369	0.495448
GSM1523993	0.638869	0.734192	0.785549	0.698604	0.726894	0.625318	0.398264	0.69831	0.565718	0.790488	0.789095	0.54722	0.315896	0.515572	0.748235	0.543917	0.591068	0.211258	0.763774	0.620165	0.610271	0.637553	0.449172	0.679322
GSM1523994	0.421831	0.599067	0.69938	0.682292	0.711749	0.677165	0.381163	0.716924	0.383821	0.748583	0.731517	0.391087	0.356242	0.4962	0.732641	0.515796	0.607706	0.210759	0.725705	0.545304	0.594069	0.585925	0.430551	0.535076
GSM1523995	0.194001	0.592827	0.548459	0.663311	0.675482	0.648456	0.206747	0.648735	0.291765	0.718522	0.584694	0.561097	0.222528	0.43772	0.711222	0.449822	0.574072	0.393488	0.732313	0.386464	0.546905	0.537295	0.412607	0.507658
GSM1523996	0.191357	0.560419	0.678856	0.659888	0.691401	0.679041	0.310889	0.724058	0.382241	0.769272	0.674456	0.333642	0.340197	0.498304	0.719026	0.526682	0.584186	0.199627	0.748155	0.550093	0.578441	0.578032	0.427315	0.584061
GSM1523997	0.280598	0.678203	0.653951	0.647876	0.6347	0.636394	0.347395	0.725848	0.341802	0.731295	0.610209	0.395886	0.45819	0.503991	0.71418	0.510791	0.584198	0.260543	0.69205	0.497458	0.538617	0.532832	0.405606	0.472155
GSM1523998	0.197071	0.600378	0.529527	0.655309	0.706695	0.687919	0.312419	0.635421	0.312253	0.70551	0.585148	0.363768	0.394653	0.41252	0.733533	0.462534	0.584666	0.070271	0.734895	0.479262	0.505201	0.490866	0.421098	0.516074
GSM1523999	0.145854	0.5637	0.497399	0.631644	0.663861	0.707345	0.243517	0.668009	0.271993	0.713195	0.572427	0.512707	0.431265	0.326147	0.695828	0.509425	0.547115	0.350433	0.765442	0.429538	0.510506	0.51365	0.447946	0.477051
GSM1524000	0.50943	0.701196	0.739958	0.719034	0.710979	0.646185	0.332664	0.721997	0.500267	0.785284	0.79306	0.329188	0.343858	0.501673	0.730197	0.585636	0.581906	0.184287	0.73453	0.624289	0.606403	0.618485	0.439194	0.592672
GSM1524001	0.36403	0.659328	0.656923	0.673369	0.640596	0.673285	0.344855	0.672647	0.34286	0.720826	0.676356	0.289743	0.437145	0.464233	0.741708	0.531994	0.583016	0.192946	0.702534	0.481026	0.559226	0.510195	0.383073	0.551175
GSM1524002	0.568516	0.819574	0.86273	0.767799	0.706569	0.685999	0.388361	0.740734	0.579403	0.746569	0.886615	0.619532	0.396169	0.451105	0.77497	0.55376	0.671325	0.35204	0.756819	0.614064	0.611421	0.65059	0.477685	0.598795
GSM1524003	0.261087	0.519232	0.554867	0.631447	0.657998	0.608077	0.2767	0.663657	0.345767	0.68761	0.532999	0.311057	0.356971	0.370697	0.760374	0.462305	0.541172	0.345878	0.741996	0.452167	0.530282	0.498678	0.402418	0.481399
GSM1524004	0.391986	0.685798	0.727345	0.707011	0.740305	0.669191	0.408005	0.713793	0.377112	0.763686	0.741516	0.433205	0.369257	0.492247	0.741015	0.515795	0.622919	0.256444	0.720666	0.560256	0.565017	0.558233	0.423366	0.59996
GSM1524005	0.317431	0.696115	0.653467	0.658974	0.664868	0.676848	0.323274	0.724347	0.350065	0.77347	0.609938	0.321857	0.392055	0.434628	0.711528	0.518058	0.582898	0.14619	0.72435	0.565531	0.554473	0.526867	0.378558	0.57639
GSM1524006	0.398367	0.521891	0.751159	0.64567	0.672978	0.597386	0.40379	0.664191	0.456986	0.713072	0.751595	0.216617	0.47008	0.669703	0.724989	0.564984	0.652538	0.0716451	0.790439	0.602059	0.648451	0.651865	0.382641	0.584209
GSM1524007	0.509475	0.752202	0.721081	0.665457	0.693456	0.663563	0.422624	0.712895	0.42489	0.766652	0.703385	0.37737	0.418821	0.580171	0.744272	0.529026	0.579462	0.229207	0.73823	0.595588	0.620786	0.576094	0.379637	0.58105
GSM1524008	0.299201	0.737324	0.63411	0.725852	0.677649	0.693959	0.339289	0.695152	0.395989	0.759233	0.723726	0.463827	0.314043	0.619089	0.754837	0.571607	0.588216	0.257932	0.754853	0.548766	0.572952	0.585077	0.440779	0.614064
GSM1524009	0.428071	0.635235	0.663403	0.711351	0.728106	0.65965	0.449716	0.684332	0.388842	0.77547	0.787738	0.385135	0.335762	0.610062	0.750133	0.568647	0.622925	0.140925	0.781947	0.569805	0.608537	0.644901	0.451867	0.578549
GSM1524010	0.702246	0.577266	0.772834	0.663765	0.685	0.610221	0.505858	0.705842	0.634554	0.729156	0.745633	0.349072	0.390944	0.657672	0.753364	0.539839	0.645303	0.272928	0.738239	0.538098	0.63562	0.613502	0.442939	0.531005
GSM1524011	0.16818	0.562026	0.48524	0.665568	0.648785	0.698602	0.285836	0.649032	0.318431	0.753185	0.516154	0.317991	0.339323	0.36893	0.71695	0.485071	0.531397	0.277236	0.718749	0.400761	0.487694	0.519022	0.44906	0.564402
GSM1524012	0.345277	0.677149	0.707425	0.753341	0.714493	0.67484	0.359458	0.795579	0.405546	0.803114	0.816232	0.389479	0.450926	0.581804	0.773712	0.562949	0.572178	0.5303	0.740135	0.659745	0.595789	0.598028	0.435669	0.636219
GSM1524013	0.315398	0.697532	0.617392	0.701771	0.691186	0.639541	0.29693	0.714467	0.428659	0.752888	0.746878	0.461833	0.368934	0.444515	0.727583	0.515583	0.63316	0.500898	0.741919	0.566574	0.522941	0.57932	0.444045	0.563378
GSM1524014	0.182152	0.60679	0.582549	0.641696	0.610699	0.688146	0.266038	0.643389	0.345836	0.693155	0.492087	0.441405	0.368972	0.325468	0.71873	0.451635	0.573754	0.21845	0.725141	0.386253	0.523844	0.531343	0.418967	0.628984
GSM1524015	0.275698	0.626987	0.593553	0.61922	0.707906	0.695802	0.294387	0.687653	0.232055	0.743687	0.617659	0.260039	0.408672	0.323706	0.753128	0.46789	0.504317	0.233171	0.710709	0.465461	0.522304	0.529666	0.377712	0.510833
GSM1524016	0.615468	0.755889	0.765032	0.732224	0.708387	0.683855	0.417435	0.711557	0.55115	0.782178	0.814728	0.426134	0.435513	0.51824	0.782124	0.523587	0.612633	0.234032	0.783002	0.606461	0.603434	0.599662	0.461684	0.598507
GSM1524017	0.335255	0.70492	0.721932	0.720204	0.716092	0.667759	0.286754	0.719421	0.39239	0.748367	0.729601	0.38562	0.325647	0.43743	0.73907	0.528774	0.599164	0.218074	0.72166	0.544253	0.559416	0.561321	0.433077	0.560691
GSM1524018	0.258779	0.653893	0.642619	0.709213	0.71394	0.690337	0.264573	0.709277	0.351108	0.758639	0.70304	0.317897	0.419147	0.499775	0.732941	0.528362	0.551132	0.129675	0.723061	0.54547	0.548813	0.56418	0.4269	0.549849
GSM1524019	0.468905	0.724192	0.729407	0.713793	0.690012	0.661257	0.440561	0.737158	0.465551	0.760209	0.795451	0.361465	0.483431	0.569514	0.721167	0.538321	0.602139	0.209874	0.74615	0.60664	0.612712	0.568767	0.429671	0.63284
GSM1524020	0.465328	0.683773	0.682199	0.699014	0.713332	0.688528	0.359642	0.686314	0.437311	0.740335	0.739475	0.394001	0.318864	0.526855	0.735789	0.528249	0.593032	0.217119	0.714852	0.561246	0.561804	0.573566	0.433768	0.564715
GSM1524021	0.479102	0.706644	0.695495	0.728991	0.708807	0.660396	0.348746	0.744909	0.452378	0.79721	0.791931	0.501023	0.265581	0.607482	0.754322	0.560184	0.616535	0.287546	0.773248	0.612789	0.608468	0.611899	0.464897	0.610269
GSM1524022	0.610406	0.718169	0.7364	0.672332	0.710556	0.637863	0.42528	0.706449	0.583315	0.740642	0.748534	0.36688	0.496972	0.580864	0.748855	0.608063	0.632635	0.0256704	0.772928	0.658765	0.634865	0.612396	0.420663	0.644342
GSM1524023	0.270634	0.688907	0.701274	0.685331	0.690266	0.684504	0.259782	0.691816	0.31054	0.746418	0.694419	0.320887	0.339145	0.441519	0.694789	0.52309	0.589442	0.259913	0.747217	0.51024	0.542878	0.540423	0.395002	0.568323
GSM1524024	0.32429	0.589319	0.641324	0.685306	0.710182	0.702195	0.315	0.697759	0.331436	0.757714	0.664205	0.339705	0.324826	0.486045	0.71014	0.498451	0.591426	0.124206	0.76551	0.548292	0.562212	0.57568	0.442293	0.615226
GSM1524025	0.230183	0.75186	0.723017	0.765629	0.694532	0.69133	0.263148	0.744051	0.410045	0.741828	0.783721	0.637016	0.466358	0.573579	0.712981	0.571622	0.657209	0.37858	0.779376	0.663749	0.612582	0.61261	0.440853	0.529003
GSM1524026	0.358113	0.563864	0.650739	0.68695	0.665644	0.670257	0.379297	0.689489	0.405202	0.723114	0.76543	0.381726	0.449186	0.554457	0.715098	0.58197	0.612997	0.202297	0.778033	0.565471	0.594335	0.601325	0.476244	0.531483
GSM1524027	0.270045	0.638942	0.567275	0.699953	0.670989	0.69229	0.3763	0.669736	0.352623	0.734086	0.715731	0.347752	0.373894	0.493745	0.748275	0.537003	0.607929	0.273293	0.744464	0.527089	0.572464	0.561162	0.458267	0.546215
GSM1524028	0.334926	0.676609	0.678892	0.702946	0.723536	0.668573	0.395101	0.694253	0.315338	0.735091	0.664258	0.521969	0.332204	0.467846	0.740788	0.473968	0.56085	0.368488	0.74851	0.504807	0.521714	0.539158	0.441879	0.602287
GSM1524029	0.446744	0.500718	0.677361	0.637165	0.678622	0.631988	0.393735	0.60735	0.407866	0.691941	0.701432	0.346451	0.31242	0.532107	0.710283	0.481682	0.63818	0.0104157	0.724369	0.485184	0.589104	0.592278	0.409732	0.490162
GSM1524030	0.582064	0.482045	0.690885	0.602805	0.663744	0.580341	0.448568	0.621077	0.553829	0.720519	0.699248	0.182331	0.32672	0.642613	0.696333	0.504272	0.631937	0.0392863	0.752857	0.568031	0.563635	0.610612	0.366444	0.567958
GSM1524031	0.165277	0.703234	0.608839	0.677282	0.641148	0.703583	0.228751	0.701768	0.279942	0.742043	0.656463	0.510811	0.345948	0.500107	0.737036	0.545002	0.604264	0.174367	0.73297	0.569609	0.54917	0.561964	0.452369	0.552348
GSM1524032	0.158552	0.73947	0.593653	0.787088	0.671905	0.707424	0.350712	0.737861	0.320804	0.762777	0.758375	0.711838	0.302056	0.566723	0.699556	0.568843	0.641813	0.345111	0.783476	0.639126	0.596985	0.612871	0.465147	0.591621
GSM1524033	0.637319	0.757115	0.818284	0.706293	0.7125	0.693317	0.364212	0.721211	0.543139	0.752251	0.8346	0.513896	0.404464	0.471008	0.763981	0.587704	0.656985	0.262243	0.746819	0.577447	0.607591	0.600306	0.449157	0.556876
GSM1524034	0.638033	0.624154	0.733166	0.705283	0.768281	0.655087	0.479249	0.720217	0.566309	0.769352	0.818447	0.333824	0.434458	0.677409	0.762336	0.527177	0.598142	0.2555	0.74114	0.577979	0.589697	0.606586	0.447585	0.557816
GSM1524035	0.495999	0.643657	0.756841	0.691141	0.719667	0.646233	0.402814	0.721649	0.457653	0.742157	0.809507	0.387748	0.457244	0.678073	0.752568	0.554826	0.660933	0.0563658	0.760485	0.60092	0.64392	0.625543	0.425216	0.596706
GSM1524036	0.245071	0.639139	0.569876	0.659454	0.66401	0.660184	0.214799	0.686656	0.285411	0.725265	0.624899	0.313725	0.36929	0.416812	0.716101	0.537705	0.580831	0.127992	0.729693	0.500745	0.592437	0.521264	0.390593	0.514073
GSM1524037	0.362468	0.585618	0.640617	0.708149	0.678168	0.692481	0.457219	0.735684	0.419044	0.754494	0.781093	0.402208	0.336571	0.528796	0.72903	0.5738	0.634563	0.170187	0.78345	0.642414	0.612213	0.60482	0.427403	0.5351
GSM1524038	0.30693	0.800867	0.810619	0.85116	0.72369	0.725679	0.406068	0.748829	0.409178	0.816452	0.899306	0.752949	0.598938	0.676217	0.755881	0.618127	0.6588	0.387208	0.827822	0.707695	0.643129	0.65924	0.511502	0.582021
GSM1524039	0.309117	0.68015	0.642294	0.799574	0.781948	0.670332	0.52025	0.810253	0.44675	0.830673	0.901001	0.53574	0.474385	0.856622	0.765014	0.6866	0.668864	0.535952	0.854721	0.809119	0.726309	0.703525	0.482261	0.622368
GSM1524040	0.582513	0.784804	0.740718	0.734857	0.750852	0.686151	0.410378	0.732671	0.497476	0.80446	0.819923	0.391508	0.524832	0.681575	0.748544	0.542366	0.593342	0.371408	0.745609	0.609953	0.594105	0.622466	0.434957	0.630768
GSM1524041	0.206519	0.775385	0.684945	0.715049	0.700377	0.643333	0.318881	0.754073	0.350166	0.6923	0.746449	0.64173	0.452934	0.530443	0.69046	0.592041	0.616565	0.129349	0.698697	0.633143	0.56255	0.595389	0.427876	0.556304
GSM1524042	0.5066	0.760556	0.738066	0.750643	0.741858	0.670823	0.436282	0.708336	0.446712	0.83703	0.832624	0.73672	0.450739	0.631116	0.745977	0.562126	0.669447	0.49922	0.7986	0.613722	0.614778	0.616484	0.467807	0.576646
GSM1524043	0.408673	0.796479	0.867515	0.760827	0.71619	0.677169	0.431021	0.772651	0.4677	0.755329	0.833867	0.675961	0.55929	0.530973	0.746291	0.595381	0.660971	0.258262	0.747153	0.668658	0.622415	0.634162	0.49752	0.649791
GSM1524044	0.38318	0.647722	0.679794	0.66843	0.697091	0.64689	0.357204	0.726356	0.370051	0.742338	0.68088	0.440143	0.383322	0.518948	0.746304	0.527043	0.617763	0.0756233	0.758377	0.567056	0.620038	0.586724	0.435075	0.56952
GSM1524045	0.26084	0.593669	0.579009	0.60784	0.744234	0.690216	0.325776	0.668173	0.332587	0.717358	0.471138	0.370291	0.278231	0.516935	0.723682	0.493068	0.526816	0.296022	0.7552	0.446165	0.552531	0.579513	0.431804	0.547191
GSM1524046	0.601376	0.680564	0.690356	0.702248	0.700442	0.680988	0.430411	0.692397	0.48634	0.760746	0.794294	0.314836	0.36017	0.538859	0.756524	0.545556	0.603954	0.123166	0.784004	0.579862	0.617951	0.632969	0.386303	0.601954
GSM1524047	0.373979	0.570851	0.593514	0.745798	0.681062	0.678207	0.452772	0.696343	0.440187	0.754582	0.738676	0.363014	0.349534	0.500267	0.76054	0.482156	0.593159	0.253554	0.727005	0.534263	0.604594	0.556246	0.434492	0.536797
GSM1524048	0.243942	0.7226	0.748877	0.696056	0.615479	0.651159	0.302021	0.721162	0.370255	0.78132	0.76447	0.282415	0.400182	0.485189	0.725479	0.545773	0.655588	0.123196	0.748867	0.64246	0.602042	0.593501	0.405668	0.568212
GSM1524049	0.388162	0.676753	0.693327	0.716982	0.723174	0.681066	0.280561	0.68942	0.413079	0.786974	0.714259	0.513351	0.4324	0.5126	0.712574	0.57504	0.616971	0.181305	0.737143	0.593496	0.579616	0.619597	0.482906	0.572494
GSM1524050	0.193961	0.521911	0.566794	0.660886	0.722034	0.75374	0.265262	0.704628	0.279005	0.735637	0.549148	0.282671	0.339261	0.437798	0.699219	0.512159	0.56582	0.241841	0.691241	0.483684	0.525922	0.55759	0.423341	0.482596
GSM1524051	0.482155	0.687946	0.786576	0.728587	0.739868	0.664448	0.36149	0.736647	0.472644	0.784559	0.801442	0.51968	0.373838	0.516324	0.754781	0.532686	0.607549	0.298284	0.762867	0.60061	0.621879	0.612241	0.490314	0.597262
GSM1524052	0.175981	0.489759	0.570091	0.646464	0.692741	0.570682	0.232659	0.658317	0.318464	0.736649	0.634239	0.285616	0.296255	0.502723	0.717166	0.514346	0.60867	0.139357	0.73321	0.502586	0.540449	0.588548	0.458651	0.574624
GSM1524053	0.324474	0.621506	0.637639	0.703686	0.677528	0.688968	0.267541	0.689502	0.381223	0.725727	0.700438	0.415965	0.370112	0.429445	0.715065	0.511329	0.631043	0.253454	0.712533	0.578999	0.63297	0.539923	0.449209	0.551719
GSM1524054	0.200081	0.738008	0.654662	0.659605	0.683645	0.663072	0.268869	0.733213	0.301574	0.695254	0.604307	0.359	0.326762	0.423926	0.700429	0.540434	0.570135	0.147776	0.659474	0.551211	0.535613	0.551171	0.403498	0.598617
GSM1524055	0.230135	0.672738	0.565558	0.697439	0.723919	0.715838	0.317506	0.769135	0.38189	0.783958	0.710529	0.431737	0.528145	0.557866	0.743087	0.572885	0.633016	0.231702	0.783347	0.665608	0.610478	0.595946	0.383221	0.566799
GSM1524056	0.310263	0.64673	0.626639	0.740218	0.677898	0.690478	0.325938	0.720217	0.379812	0.724534	0.735839	0.48097	0.485585	0.513233	0.79691	0.550148	0.591122	0.23615	0.743063	0.614084	0.599303	0.572946	0.406555	0.47473
GSM1524057	0.244407	0.465983	0.626178	0.608875	0.623792	0.539806	0.24106	0.693044	0.328974	0.728656	0.639495	0.212313	0.382394	0.52185	0.688182	0.542008	0.631556	0.0427783	0.748092	0.57744	0.583051	0.565938	0.360026	0.560559
GSM1524058	0.719798	0.743013	0.84306	0.769835	0.766977	0.66777	0.472046	0.758703	0.597121	0.807658	0.936578	0.651594	0.504829	0.691887	0.793153	0.640081	0.704098	0.316405	0.803291	0.697506	0.681683	0.71638	0.442738	0.61247
GSM1524059	0.523764	0.784571	0.727675	0.799676	0.751306	0.623674	0.540005	0.80635	0.546768	0.825676	0.92502	0.58286	0.530087	0.807325	0.816812	0.628789	0.665882	0.537655	0.875536	0.735219	0.687559	0.693747	0.462264	0.608124
GSM1524060	0.137948	0.634383	0.541461	0.691416	0.702641	0.694748	0.275359	0.710216	0.293928	0.736368	0.627665	0.689887	0.3708	0.480165	0.691506	0.55575	0.607013	0.142956	0.685839	0.542607	0.510215	0.557079	0.498108	0.537914
GSM1524061	0.178455	0.657947	0.628293	0.666427	0.675143	0.659689	0.233262	0.65009	0.305229	0.689743	0.536326	0.496061	0.410514	0.347712	0.730311	0.511889	0.569631	0.137743	0.659943	0.455056	0.481693	0.557103	0.410175	0.602643
GSM1524062	0.45664	0.523613	0.720452	0.626979	0.644605	0.580629	0.387438	0.636103	0.517435	0.706146	0.682543	0.222537	0.376376	0.616939	0.723605	0.489999	0.62759	0.0645908	0.726977	0.546873	0.590232	0.631464	0.407658	0.54855
GSM1524068	0.335642	0.645607	0.693368	0.683047	0.646959	0.688964	0.360198	0.695338	0.355472	0.717749	0.593384	0.407186	0.45412	0.36581	0.732908	0.488652	0.568461	0.134309	0.67751	0.498835	0.570821	0.562625	0.342053	0.519042
GSM1524069	0.157052	0.631549	0.62465	0.680296	0.61947	0.689706	0.35481	0.683419	0.305516	0.712796	0.648473	0.279499	0.307873	0.421442	0.7081	0.45477	0.540637	0.203753	0.687365	0.441962	0.484132	0.540306	0.402209	0.54154
GSM1524070	0.240306	0.530107	0.63084	0.66015	0.712142	0.68878	0.34438	0.64931	0.348074	0.704274	0.59628	0.310728	0.41261	0.45783	0.726645	0.488683	0.528747	0.124437	0.733615	0.43029	0.521279	0.540084	0.427603	0.57535
GSM1524071	0.356613	0.575519	0.659323	0.67131	0.679415	0.700115	0.350426	0.699119	0.325797	0.707088	0.659946	0.503738	0.412033	0.407974	0.727477	0.500176	0.612413	0.320035	0.705482	0.458362	0.544599	0.555361	0.404812	0.521146
GSM1524072	0.468066	0.604566	0.679602	0.704233	0.70005	0.661542	0.359026	0.668034	0.37874	0.755109	0.750781	0.422852	0.400254	0.496167	0.759806	0.520506	0.623531	0.0980095	0.752439	0.494238	0.589242	0.569066	0.451012	0.533932
GSM2235556	0.129001	0.575114	0.560379	0.64507	0.65578	0.669647	0.313077	0.625456	0.204669	0.712905	0.577183	0.268346	0.525854	0.436011	0.735736	0.471224	0.559712	0.172619	0.728049	0.490195	0.566316	0.492286	0.355093	0.506233
GSM2235557	0.277933	0.524052	0.610335	0.694203	0.730848	0.707085	0.362158	0.683274	0.398082	0.771573	0.687485	0.366802	0.432724	0.47335	0.758225	0.542896	0.568046	0.193057	0.756302	0.545094	0.608414	0.602345	0.452945	0.495425
GSM2235558	0.442906	0.547302	0.674099	0.66663	0.713215	0.702275	0.438814	0.651696	0.446855	0.734745	0.730252	0.446897	0.457914	0.446893	0.760464	0.490197	0.584718	0.26967	0.749838	0.536562	0.611119	0.598873	0.428164	0.483935
GSM2235559	0.525068	0.625524	0.710377	0.664832	0.655963	0.705999	0.417299	0.637778	0.483518	0.76458	0.740521	0.362505	0.514363	0.406433	0.777777	0.525954	0.574537	0.0942351	0.751413	0.565563	0.613469	0.590201	0.451829	0.547031
GSM2235560	0.297186	0.630842	0.739765	0.691113	0.674696	0.685472	0.363432	0.619761	0.407633	0.771666	0.770891	0.367226	0.398263	0.495048	0.768709	0.526129	0.607704	0.0250193	0.751884	0.565326	0.593764	0.618093	0.456706	0.507754
GSM2235561	0.538761	0.663687	0.707226	0.661628	0.712174	0.679185	0.341075	0.666647	0.473955	0.724879	0.746672	0.44933	0.439986	0.498153	0.765818	0.536177	0.564546	0.0816887	0.757664	0.586844	0.636804	0.625902	0.447638	0.558354
GSM2235562	0.167707	0.645859	0.549532	0.641986	0.682537	0.687246	0.370871	0.647933	0.265532	0.706578	0.56532	0.314978	0.398608	0.364864	0.714879	0.486998	0.570867	0.250054	0.703683	0.470115	0.563398	0.525149	0.41409	0.547176
GSM2235563	0.204241	0.680046	0.638292	0.657259	0.695852	0.67073	0.382921	0.68708	0.347472	0.779067	0.639222	0.442213	0.461282	0.394131	0.721054	0.53632	0.5483	0.0565235	0.723097	0.597877	0.57954	0.55744	0.322152	0.539406
GSM2235564	0.15126	0.65552	0.565168	0.618646	0.690498	0.654182	0.317762	0.663255	0.247747	0.717276	0.55539	0.383614	0.444192	0.379655	0.715683	0.43183	0.514659	0.208924	0.671928	0.424727	0.48029	0.497509	0.403249	0.576403
GSM2235565	0.220749	0.497125	0.63465	0.658139	0.636907	0.639561	0.27181	0.609264	0.298842	0.736567	0.616482	0.275108	0.492528	0.477952	0.719285	0.491214	0.638036	0.0456016	0.755193	0.505549	0.556173	0.56458	0.396366	0.503312
GSM2235566	0.390502	0.613023	0.65505	0.663915	0.667791	0.692161	0.359879	0.631693	0.31064	0.703141	0.662754	0.391683	0.539732	0.411218	0.7479	0.465525	0.599544	0.110433	0.711364	0.499677	0.543921	0.521589	0.421417	0.588018
GSM2235567	0.415242	0.582883	0.66489	0.666691	0.682074	0.698096	0.401635	0.651355	0.349795	0.741522	0.702825	0.352515	0.503704	0.508424	0.768629	0.538097	0.589927	0.0250521	0.766996	0.561369	0.527423	0.568741	0.397742	0.55288
GSM2235568	0.127931	0.597599	0.473812	0.634025	0.685947	0.682336	0.356895	0.600656	0.234268	0.697792	0.54501	0.342068	0.549061	0.374625	0.728263	0.461795	0.592884	0.208188	0.725439	0.363748	0.485901	0.484758	0.351732	0.582409
GSM2235569	0.141159	0.664201	0.548165	0.674693	0.681958	0.67253	0.305544	0.681678	0.225325	0.717992	0.569084	0.598562	0.394565	0.420589	0.750339	0.52475	0.58665	0.248249	0.709281	0.477355	0.54123	0.522371	0.442243	0.547733
GSM2235570	0.268429	0.619871	0.518529	0.715988	0.692072	0.693538	0.335924	0.672708	0.326158	0.770381	0.697971	0.406871	0.50921	0.425153	0.763863	0.556399	0.668287	0.121117	0.768347	0.577289	0.578161	0.572801	0.401646	0.572521
GSM2235571	0.224089	0.672237	0.614981	0.737884	0.696265	0.721677	0.321829	0.66156	0.295635	0.760044	0.742412	0.479795	0.377049	0.44887	0.764529	0.554416	0.627028	0.290242	0.763767	0.569577	0.561418	0.544901	0.456713	0.488091
GSM2235572	0.521298	0.649772	0.806841	0.725083	0.693257	0.683912	0.408202	0.632658	0.465313	0.770602	0.783715	0.336059	0.60878	0.468353	0.76004	0.526208	0.62647	0.1637	0.757151	0.562515	0.60034	0.607807	0.399436	0.575836
GSM2235573	0.449786	0.692733	0.756813	0.701047	0.698424	0.695153	0.383754	0.653607	0.47162	0.774868	0.775324	0.384339	0.385153	0.467918	0.763023	0.51176	0.601571	0.108433	0.734596	0.566248	0.607216	0.617203	0.467796	0.526003
GSM2235574	0.163855	0.609665	0.564684	0.642182	0.682833	0.67512	0.384845	0.701161	0.249731	0.752733	0.706599	0.605195	0.334014	0.524814	0.712885	0.582958	0.581197	0.178439	0.742406	0.568737	0.566688	0.56661	0.439865	0.487637
GSM2235575	0.15285	0.634603	0.509433	0.641704	0.717007	0.678145	0.343269	0.596057	0.217955	0.738149	0.650198	0.747093	0.385353	0.443069	0.741295	0.465935	0.52176	0.321068	0.7003	0.500509	0.522824	0.512135	0.508242	0.562749
GSM2235576	0.303424	0.736809	0.758233	0.703633	0.791867	0.688544	0.474332	0.719092	0.447599	0.720936	0.867003	0.61912	0.30883	0.509553	0.748358	0.508939	0.523525	0.142597	0.691048	0.681475	0.617269	0.590698	0.413867	0.559106
GSM2235577	0.364401	0.646613	0.725334	0.671003	0.703464	0.663205	0.375124	0.691507	0.408849	0.800529	0.842822	0.472886	0.365303	0.539309	0.737398	0.547546	0.559538	0.0998841	0.733746	0.638412	0.601267	0.625251	0.452302	0.572601
GSM2235578	0.388921	0.727154	0.767116	0.646491	0.720652	0.690401	0.452009	0.702594	0.423899	0.72109	0.77787	0.425186	0.499249	0.549398	0.742308	0.523738	0.525116	0.16186	0.723256	0.614105	0.61123	0.567627	0.390087	0.551136
GSM2235579	0.259074	0.652242	0.744632	0.665683	0.783099	0.689418	0.286553	0.69501	0.45542	0.771777	0.850706	0.445573	0.326502	0.416454	0.714497	0.547243	0.565812	0.0891508	0.712291	0.648915	0.633307	0.621833	0.418803	0.527196
GSM2235580	0.646596	0.725506	0.780053	0.695464	0.680879	0.682456	0.428822	0.704333	0.589622	0.808798	0.865952	0.528713	0.311898	0.531699	0.775535	0.580442	0.554839	0.194813	0.739227	0.662833	0.63161	0.643068	0.448763	0.540508
GSM2235582	0.306554	0.603609	0.618222	0.717805	0.686615	0.695487	0.50284	0.640325	0.402228	0.747771	0.680859	0.33066	0.444371	0.496499	0.758638	0.522315	0.537093	0.268336	0.7096	0.544303	0.577153	0.563363	0.433383	0.457705
GSM2235584	0.243479	0.568773	0.597167	0.646512	0.712688	0.675122	0.438684	0.687943	0.319462	0.745232	0.722429	0.430062	0.322858	0.535937	0.734526	0.524016	0.560603	0.422827	0.71958	0.562419	0.573025	0.55396	0.448599	0.532334
GSM2235585	0.39765	0.719131	0.789667	0.68738	0.737964	0.706473	0.380242	0.726556	0.537467	0.766961	0.867508	0.509799	0.314549	0.519461	0.76876	0.562646	0.579668	0.182358	0.752676	0.719316	0.668545	0.623547	0.464358	0.612534
GSM2235586	0.773926	0.793495	0.909392	0.719547	0.760914	0.663053	0.527222	0.719889	0.721445	0.767571	0.915732	0.62795	0.32752	0.640458	0.775661	0.55488	0.617202	0.115403	0.763342	0.73919	0.735856	0.664756	0.43655	0.589756
GSM2235587	0.330428	0.660683	0.65708	0.709847	0.719937	0.681932	0.41063	0.680028	0.421322	0.753902	0.754022	0.436504	0.363687	0.54943	0.727559	0.526961	0.561841	0.0968256	0.722181	0.614551	0.578935	0.592247	0.419686	0.572011
GSM2235588	0.229108	0.532864	0.563747	0.639879	0.676448	0.635811	0.304501	0.642774	0.389123	0.760598	0.67399	0.470779	0.322921	0.553074	0.734577	0.532336	0.542339	0.132769	0.706732	0.560004	0.590928	0.604288	0.456158	0.548228
GSM2235589	0.200329	0.671086	0.594873	0.617257	0.670568	0.653355	0.461206	0.713536	0.316613	0.689434	0.614274	0.278432	0.313443	0.538095	0.744366	0.524216	0.558993	0.184257	0.721059	0.486259	0.520254	0.552667	0.412816	0.561688
GSM2235593	0.347405	0.72599	0.688563	0.669644	0.697277	0.649938	0.408885	0.69843	0.427865	0.752489	0.733848	0.452357	0.300409	0.479006	0.735097	0.560932	0.541557	0.282583	0.688327	0.570646	0.576206	0.595034	0.477121	0.56925
GSM2235595	0.678481	0.705467	0.82313	0.687275	0.710674	0.73306	0.446254	0.627606	0.583842	0.745381	0.792507	0.397047	0.429116	0.576266	0.765854	0.530388	0.603651	0.138489	0.753318	0.602687	0.627018	0.624174	0.448774	0.552253
GSM2235596	0.383303	0.667188	0.676024	0.660902	0.727103	0.651008	0.426641	0.648139	0.382334	0.746068	0.719632	0.238643	0.397049	0.454113	0.749777	0.476255	0.549728	0.308019	0.70973	0.508048	0.566164	0.574205	0.396023	0.588276
GSM2235597	0.328116	0.701076	0.607667	0.665891	0.634014	0.677553	0.370611	0.666138	0.362014	0.695884	0.665245	0.822044	0.384857	0.441266	0.751211	0.463882	0.542844	0.277149	0.727175	0.485423	0.540004	0.515905	0.463213	0.572354
GSM2235598	0.837396	0.709956	0.827462	0.708194	0.695562	0.703372	0.513775	0.684789	0.688572	0.754349	0.85003	0.476468	0.449027	0.539326	0.791068	0.587777	0.594217	0.188804	0.748501	0.648374	0.658226	0.641432	0.422315	0.524249
GSM2235599	0.400306	0.688426	0.725332	0.707261	0.69482	0.719699	0.296312	0.694046	0.452803	0.768442	0.717313	0.334502	0.422031	0.480049	0.736979	0.522573	0.579214	0.145228	0.739736	0.558149	0.592635	0.584555	0.416543	0.550547
GSM2235600	0.274841	0.673855	0.658148	0.672403	0.699064	0.68734	0.345705	0.727955	0.34997	0.766353	0.766673	0.430106	0.354613	0.565831	0.770832	0.571256	0.617741	0.235731	0.755358	0.652143	0.620107	0.614047	0.42381	0.575102
GSM2235601	0.466194	0.60892	0.680658	0.659013	0.698052	0.661657	0.329927	0.704474	0.475165	0.769397	0.772019	0.339513	0.386954	0.628177	0.740525	0.539101	0.609245	0.117711	0.740195	0.567301	0.625171	0.632144	0.447241	0.56348
GSM2235602	0.702092	0.67597	0.801981	0.685022	0.687152	0.698044	0.441799	0.64539	0.592585	0.724708	0.775234	0.431823	0.437549	0.520483	0.77762	0.552327	0.604311	0.147296	0.771978	0.625086	0.659801	0.626589	0.421123	0.550618
GSM2235603	0.195765	0.66423	0.568425	0.680378	0.687207	0.693952	0.240295	0.667459	0.301956	0.729815	0.645358	0.39022	0.37873	0.412139	0.722593	0.531122	0.586549	0.198791	0.707416	0.530462	0.582475	0.551374	0.364318	0.533276
GSM2235604	0.216756	0.696439	0.679334	0.685075	0.704593	0.714747	0.337248	0.701125	0.338022	0.694125	0.664231	0.472001	0.411659	0.512921	0.732258	0.538669	0.603372	0.0468312	0.749332	0.530412	0.549186	0.566702	0.450309	0.600583
GSM2235605	0.355355	0.630965	0.714302	0.688702	0.722459	0.706481	0.384086	0.683611	0.451789	0.771513	0.762431	0.345098	0.432123	0.612844	0.739397	0.526349	0.581047	0.169043	0.762645	0.576183	0.636558	0.630052	0.428044	0.569078
GSM2235606	0.604143	0.665523	0.796608	0.703716	0.70378	0.689305	0.388352	0.696298	0.556961	0.760907	0.856127	0.43937	0.415299	0.614964	0.777041	0.553625	0.616166	0.146337	0.781443	0.630234	0.664121	0.642667	0.393969	0.562801
GSM2235607	0.182588	0.637076	0.613672	0.757668	0.697736	0.708978	0.368647	0.765961	0.445363	0.813264	0.794396	0.534798	0.342771	0.627858	0.753516	0.595259	0.659827	0.450382	0.775672	0.685358	0.621986	0.606242	0.476647	0.573308
GSM2235608	0.120636	0.665469	0.614276	0.653827	0.67391	0.671427	0.358749	0.705414	0.268156	0.741527	0.619862	0.461484	0.409728	0.470845	0.718547	0.491112	0.556412	0.21219	0.652937	0.544859	0.535407	0.523426	0.403545	0.605663
GSM2235609	0.584423	0.721304	0.848163	0.705459	0.719701	0.696778	0.405696	0.725481	0.579281	0.786698	0.874784	0.471932	0.364137	0.58517	0.775088	0.579771	0.601154	0.178967	0.758015	0.631332	0.650138	0.648398	0.429514	0.605287
GSM2235610	0.332341	0.612718	0.74279	0.673829	0.686544	0.702799	0.279542	0.749151	0.437028	0.766806	0.798972	0.378115	0.343179	0.581161	0.737926	0.590665	0.615242	0.194703	0.752863	0.611407	0.601374	0.602536	0.452743	0.589778
GSM2235611	0.32641	0.599346	0.645898	0.667402	0.731774	0.67338	0.317929	0.733185	0.402483	0.772949	0.711228	0.405483	0.283226	0.51922	0.728515	0.52786	0.57573	0.221883	0.692421	0.551784	0.55314	0.570678	0.452717	0.55645
GSM2235612	0.375927	0.560718	0.712105	0.668	0.685365	0.661029	0.309837	0.673043	0.440751	0.745989	0.726041	0.413864	0.344473	0.526833	0.729454	0.543553	0.62979	0.117173	0.732712	0.569953	0.595537	0.601931	0.413151	0.542327
GSM2235613	0.152661	0.623417	0.581088	0.609232	0.699881	0.670436	0.331035	0.667987	0.219347	0.743464	0.604618	0.547396	0.324771	0.44698	0.727588	0.490054	0.528168	0.227817	0.704703	0.490607	0.499468	0.506581	0.423183	0.57027
GSM2235614	0.369609	0.743678	0.816665	0.696284	0.714938	0.683343	0.321896	0.731561	0.504202	0.79234	0.809356	0.498119	0.431544	0.51766	0.740863	0.559388	0.620364	0.169481	0.705888	0.648457	0.645456	0.607535	0.420378	0.587155
GSM2235615	0.286042	0.620639	0.587762	0.656929	0.687826	0.706137	0.383314	0.665419	0.300791	0.750462	0.646989	0.336537	0.420822	0.524876	0.76453	0.543524	0.583972	0.183228	0.740616	0.532063	0.551902	0.585882	0.41128	0.55411
GSM2235616	0.342493	0.684826	0.73445	0.719781	0.686188	0.692194	0.273791	0.729013	0.480225	0.817166	0.78767	0.427815	0.427796	0.541401	0.741374	0.532864	0.629876	0.378403	0.741321	0.609182	0.622884	0.605183	0.462	0.560422
GSM2235617	0.205674	0.723191	0.699151	0.694178	0.710131	0.670957	0.281361	0.683625	0.391657	0.794536	0.722838	0.820952	0.26767	0.503145	0.715636	0.515063	0.601859	0.132739	0.695511	0.566362	0.562628	0.557584	0.471119	0.618041
GSM2235618	0.214462	0.685727	0.627477	0.674412	0.733171	0.688054	0.349711	0.666191	0.303285	0.750886	0.638633	0.302053	0.448978	0.434901	0.740179	0.470079	0.570608	0.0701603	0.704255	0.477551	0.525803	0.55765	0.437769	0.546627
GSM2235619	0.274313	0.634313	0.61294	0.692366	0.68229	0.680767	0.382121	0.647626	0.383488	0.728976	0.627497	0.356083	0.479545	0.48591	0.733512	0.508488	0.564868	0.19317	0.731312	0.496108	0.561725	0.544426	0.426152	0.595641
GSM2235620	0.334238	0.643122	0.637549	0.670766	0.724127	0.709511	0.302351	0.683522	0.402255	0.762704	0.701614	0.420521	0.302123	0.409345	0.727248	0.511011	0.581701	0.149113	0.700336	0.550078	0.545107	0.564654	0.446581	0.542194
GSM2235621	0.195135	0.602379	0.630794	0.660339	0.636343	0.683587	0.378767	0.679535	0.283101	0.7494	0.680479	0.435085	0.460994	0.527936	0.722882	0.497171	0.6026	0.318981	0.747578	0.474444	0.538644	0.571076	0.365064	0.51479
GSM2235622	0.576565	0.629814	0.757986	0.665341	0.696983	0.659149	0.516662	0.69572	0.532149	0.729305	0.753853	0.368095	0.401027	0.612489	0.754764	0.524846	0.612643	0.167472	0.766045	0.583993	0.625048	0.624912	0.390895	0.566788
GSM2235623	0.260318	0.696527	0.682881	0.709264	0.694228	0.709595	0.333327	0.718032	0.408108	0.739084	0.723963	0.440434	0.3807	0.602232	0.741205	0.549582	0.594256	0.267815	0.693166	0.566837	0.537717	0.544076	0.453583	0.617508
GSM2235624	0.237108	0.724543	0.681219	0.684008	0.696731	0.673248	0.35491	0.722573	0.364331	0.77926	0.702725	0.419771	0.272247	0.502915	0.722331	0.5831	0.563127	0.26478	0.723623	0.590311	0.540405	0.568771	0.418627	0.611303
GSM2235625	0.433541	0.595213	0.767434	0.688199	0.686134	0.655139	0.370294	0.739538	0.465402	0.794328	0.834942	0.408711	0.371295	0.643698	0.732314	0.550953	0.62273	0.196468	0.74654	0.625735	0.628897	0.634654	0.453736	0.571463
GSM2235626	0.351891	0.595892	0.689531	0.675434	0.717906	0.659919	0.487172	0.79704	0.475053	0.796022	0.87581	0.422491	0.322383	0.6715	0.745943	0.609224	0.638214	0.305444	0.777874	0.712399	0.651213	0.644691	0.386735	0.563592
GSM2235627	0.229692	0.64859	0.63623	0.644021	0.711912	0.696181	0.284356	0.68338	0.399034	0.729042	0.748353	0.461822	0.338802	0.477453	0.727709	0.510961	0.582253	0.316901	0.727766	0.597891	0.558157	0.574255	0.41583	0.535973
GSM2235628	0.313324	0.593898	0.636851	0.676907	0.700516	0.660882	0.410002	0.725723	0.420381	0.777042	0.801322	0.401044	0.306302	0.573592	0.711552	0.576518	0.634583	0.225393	0.741491	0.705574	0.629182	0.611706	0.388668	0.569352
GSM2235629	0.525223	0.702428	0.763166	0.682445	0.67719	0.688124	0.459551	0.766286	0.518208	0.78172	0.858228	0.479894	0.332392	0.704262	0.750386	0.576148	0.625773	0.330122	0.771064	0.68481	0.622533	0.637108	0.404826	0.593352
GSM2235630	0.557664	0.612753	0.730397	0.66715	0.680265	0.656025	0.431816	0.712161	0.559782	0.742264	0.774848	0.350276	0.442824	0.610585	0.777354	0.53704	0.609347	0.19917	0.790739	0.608467	0.632332	0.648528	0.380473	0.519306
GSM2235631	0.604663	0.708965	0.836865	0.700968	0.71423	0.670492	0.440567	0.708647	0.603332	0.790605	0.829878	0.423867	0.334796	0.541657	0.744534	0.562337	0.60182	0.219189	0.749968	0.646001	0.649169	0.648322	0.413514	0.543219
GSM2235632	0.575975	0.774212	0.790561	0.668661	0.690918	0.66556	0.356795	0.762562	0.586655	0.777357	0.842232	0.459175	0.286192	0.558707	0.768438	0.549466	0.591732	0.254246	0.72921	0.666943	0.66547	0.626198	0.437865	0.581023
GSM2235633	0.422547	0.689555	0.782273	0.695897	0.706362	0.644533	0.396996	0.729773	0.529334	0.809897	0.878827	0.426688	0.25868	0.592992	0.749652	0.559433	0.632436	0.218248	0.768755	0.656772	0.647048	0.654662	0.438104	0.572908
GSM2235634	0.247339	0.629076	0.577458	0.694644	0.726732	0.68166	0.30083	0.738586	0.355535	0.806717	0.720198	0.528892	0.295723	0.692859	0.73814	0.552622	0.573799	0.216509	0.771396	0.561863	0.582021	0.600614	0.49603	0.565882
GSM2235635	0.344455	0.764637	0.768942	0.703527	0.689598	0.67442	0.374511	0.714739	0.408795	0.758079	0.718733	0.360691	0.388332	0.488054	0.761087	0.550027	0.590424	0.200111	0.727939	0.601833	0.606872	0.59315	0.394342	0.576763
GSM2235636	0.300654	0.570461	0.749319	0.661901	0.707353	0.640461	0.340834	0.70601	0.442428	0.808702	0.806497	0.390053	0.296968	0.604862	0.739562	0.527437	0.590949	0.232346	0.767129	0.605838	0.635995	0.63311	0.418094	0.546
GSM2235637	0.462153	0.747974	0.760953	0.72185	0.733963	0.703606	0.415559	0.683694	0.535055	0.757742	0.753531	0.489778	0.477645	0.550901	0.761734	0.561445	0.589912	0.211256	0.750217	0.580079	0.578821	0.591223	0.457438	0.578813
GSM2235695	0.267065	0.723372	0.571941	0.764103	0.689898	0.657359	0.299158	0.704691	0.407164	0.722171	0.583487	0.336643	0.497021	0.441551	0.745342	0.555919	0.669155	0.286972	0.68019	0.500964	0.51925	0.528993	0.459873	0.626927
GSM2235696	0.291133	0.799952	0.803703	0.688776	0.667137	0.670387	0.355555	0.706776	0.473562	0.705716	0.732399	0.529445	0.400116	0.466444	0.728004	0.610721	0.655574	0.232349	0.707202	0.600839	0.571607	0.584839	0.392433	0.653928
GSM2235697	0.199806	0.628816	0.515271	0.640989	0.661497	0.662895	0.293328	0.668472	0.286097	0.69054	0.534527	0.413852	0.501826	0.412715	0.754418	0.498667	0.56757	0.154765	0.709423	0.465114	0.472405	0.484645	0.341286	0.601803
GSM2235698	0.200242	0.682785	0.684014	0.686295	0.657755	0.687162	0.333805	0.687349	0.343321	0.713382	0.628034	0.292025	0.388079	0.52312	0.740007	0.545634	0.554989	0.213593	0.721757	0.525415	0.551323	0.543336	0.400201	0.541808
GSM2235699	0.193035	0.638404	0.610207	0.660806	0.680096	0.668092	0.278276	0.728624	0.328879	0.768188	0.674094	0.382269	0.401977	0.508909	0.684722	0.54302	0.612711	0.134603	0.724457	0.596653	0.582052	0.564374	0.420761	0.589618
GSM2235700	0.386553	0.717565	0.698565	0.714268	0.679709	0.672691	0.450027	0.710188	0.449123	0.763857	0.741035	0.270002	0.468776	0.563197	0.714221	0.544272	0.6023	0.247806	0.753241	0.593679	0.58147	0.581305	0.430209	0.601058
GSM2235701	0.184003	0.698225	0.55771	0.615764	0.664878	0.660977	0.377978	0.668893	0.261705	0.69235	0.602759	0.459804	0.3982	0.488023	0.71655	0.485456	0.551549	0.217498	0.700383	0.475252	0.50964	0.510371	0.396011	0.565085
GSM2235702	0.184003	0.608263	0.618376	0.708681	0.714761	0.664949	0.356466	0.684034	0.339586	0.774172	0.702959	0.211732	0.384496	0.504442	0.703805	0.541412	0.641566	0.115269	0.734987	0.576207	0.590347	0.58164	0.410972	0.582207
GSM2235703	0.495157	0.706414	0.682686	0.670088	0.666099	0.652984	0.389413	0.708973	0.48257	0.74586	0.720654	0.295687	0.395132	0.533402	0.699017	0.525445	0.624745	0.160003	0.736675	0.563283	0.5791	0.574001	0.40618	0.596769
GSM2235704	0.413986	0.641635	0.655975	0.691673	0.683219	0.641927	0.438799	0.695797	0.447621	0.740016	0.721611	0.350527	0.397174	0.557087	0.738067	0.556093	0.615813	0.26509	0.735449	0.576005	0.59394	0.583291	0.435592	0.531949
GSM2235705	0.279613	0.582932	0.611799	0.698016	0.675597	0.658354	0.443234	0.68997	0.405281	0.732258	0.71447	0.298115	0.281688	0.572008	0.783296	0.559176	0.589105	0.342469	0.751425	0.577009	0.597279	0.571392	0.442225	0.513525
GSM2235706	0.231477	0.639202	0.568196	0.661306	0.628676	0.65558	0.276318	0.689487	0.339359	0.71836	0.648477	0.369169	0.347274	0.494445	0.727729	0.561245	0.564778	0.201681	0.704308	0.520984	0.551056	0.521898	0.373809	0.553077
GSM2235707	0.292881	0.714484	0.6474	0.70028	0.700178	0.657863	0.408534	0.708335	0.395851	0.809272	0.738071	0.272457	0.274359	0.474605	0.734808	0.529483	0.607827	0.209745	0.710344	0.597343	0.558487	0.561117	0.463203	0.609265
GSM2235708	0.378249	0.73706	0.703035	0.688864	0.637244	0.654567	0.385396	0.691301	0.433972	0.730823	0.643467	0.291046	0.471796	0.449038	0.77226	0.519101	0.618929	0.27293	0.733601	0.561674	0.568398	0.564406	0.412646	0.617528
GSM2235709	0.176086	0.70908	0.73066	0.676527	0.680834	0.678555	0.367668	0.674119	0.317458	0.746083	0.622112	0.249023	0.524125	0.50077	0.811504	0.54098	0.556277	0.290815	0.743912	0.534626	0.560955	0.528901	0.373463	0.606993
GSM2235710	0.203705	0.662252	0.611165	0.701178	0.677158	0.673698	0.372258	0.6885	0.362008	0.767459	0.668868	0.462072	0.347969	0.528159	0.763682	0.564174	0.645579	0.243719	0.78776	0.621265	0.587781	0.558705	0.461286	0.60446
GSM2235711	0.26265	0.759262	0.749984	0.694095	0.691024	0.679061	0.318211	0.69485	0.379857	0.722529	0.661544	0.274782	0.388525	0.454972	0.709671	0.519077	0.612181	0.254623	0.720744	0.571785	0.570297	0.553631	0.395742	0.624299
GSM2235712	0.112582	0.637523	0.494378	0.662729	0.624968	0.62914	0.271695	0.621745	0.273345	0.696187	0.462557	0.315532	0.539451	0.40635	0.717002	0.478338	0.527535	0.321432	0.674381	0.419591	0.472713	0.46361	0.388426	0.57543
GSM2235713	0.413807	0.533256	0.613215	0.643073	0.672177	0.628739	0.405155	0.653222	0.466106	0.714929	0.635629	0.375688	0.344275	0.493289	0.727575	0.494589	0.642316	0.0911589	0.71406	0.531405	0.581707	0.581054	0.459276	0.528818
GSM2235714	0.111102	0.568924	0.528846	0.637786	0.675673	0.631729	0.318873	0.633303	0.267559	0.693303	0.509415	0.270965	0.394002	0.435359	0.745491	0.425796	0.534651	0.263578	0.71357	0.449736	0.485822	0.481724	0.42213	0.62822
GSM2235715	0.308016	0.795272	0.839823	0.729925	0.689967	0.639833	0.336981	0.762454	0.497296	0.794822	0.817554	0.527056	0.342685	0.497908	0.740518	0.587122	0.654388	0.231228	0.728717	0.679086	0.598915	0.603576	0.446774	0.630775
GSM2235716	0.172625	0.692153	0.563637	0.60836	0.679828	0.598209	0.360118	0.679623	0.250875	0.674455	0.546939	0.678019	0.533956	0.385909	0.66885	0.500659	0.637349	0.0941469	0.694854	0.482377	0.510434	0.480567	0.398162	0.658781
GSM2235717	0.196169	0.567879	0.682718	0.696602	0.658615	0.664097	0.375789	0.670744	0.365137	0.726655	0.741416	0.339222	0.480475	0.583073	0.735087	0.544748	0.605665	0.243584	0.746988	0.529503	0.574311	0.584465	0.397437	0.550086
GSM2235718	0.498757	0.668274	0.732076	0.698301	0.721397	0.695893	0.425882	0.673041	0.439849	0.749582	0.731381	0.431919	0.449537	0.578984	0.772458	0.501376	0.587137	0.398473	0.756927	0.551866	0.582138	0.5614	0.465146	0.563014
GSM2235719	0.261218	0.666157	0.66235	0.710517	0.692017	0.688686	0.344363	0.701755	0.363253	0.750022	0.711369	0.496317	0.494512	0.528847	0.724477	0.573457	0.576621	0.229023	0.729903	0.578368	0.570826	0.553497	0.460726	0.50318
GSM2235720	0.290047	0.659766	0.650141	0.679321	0.720356	0.708028	0.243983	0.721724	0.404055	0.764538	0.672298	0.420201	0.356392	0.411358	0.735162	0.539107	0.56788	0.178617	0.768797	0.606904	0.537093	0.55514	0.354238	0.582877
GSM2235721	0.23162	0.696465	0.693624	0.707244	0.68545	0.679187	0.331076	0.738953	0.404548	0.730304	0.707954	0.590737	0.337061	0.540613	0.770028	0.555988	0.646821	0.23224	0.742569	0.597421	0.585201	0.605108	0.437981	0.548485
GSM2235722	0.436586	0.689282	0.720698	0.713227	0.689213	0.704627	0.303438	0.710977	0.434825	0.757591	0.789979	0.403393	0.324268	0.575542	0.735268	0.556973	0.633365	0.228885	0.7294	0.533445	0.572943	0.61101	0.434988	0.593565
GSM2235723	0.152999	0.577326	0.537175	0.639614	0.684133	0.706914	0.345005	0.648062	0.267031	0.698443	0.545599	0.361279	0.435631	0.435222	0.730546	0.427151	0.536566	0.285624	0.701393	0.41878	0.496356	0.492001	0.391551	0.555647
GSM2235724	0.457914	0.741752	0.734216	0.704946	0.717942	0.666232	0.34894	0.745531	0.484902	0.762732	0.816931	0.546096	0.311805	0.624864	0.739816	0.588478	0.614387	0.159146	0.722914	0.629334	0.601829	0.62698	0.44833	0.633028
GSM2235725	0.367754	0.766285	0.880166	0.740881	0.687986	0.687579	0.367012	0.771744	0.521812	0.753854	0.927724	0.606706	0.383425	0.636781	0.768255	0.626706	0.691227	0.238665	0.76566	0.717698	0.638476	0.674935	0.464384	0.60862
GSM2235726	0.692772	0.791066	0.924867	0.743528	0.702587	0.637615	0.383726	0.77	0.653881	0.738609	0.939211	0.420809	0.391473	0.613095	0.787892	0.589048	0.675303	0.283156	0.794991	0.700726	0.703582	0.652151	0.43125	0.624953
GSM2235727	0.327451	0.652986	0.755996	0.702233	0.738976	0.693908	0.366375	0.709583	0.391542	0.726846	0.749603	0.344938	0.37045	0.597818	0.823521	0.498344	0.591928	0.29749	0.721484	0.563584	0.57402	0.594174	0.429466	0.564246
GSM2235728	0.342479	0.695029	0.692822	0.683344	0.701565	0.681992	0.356146	0.729639	0.386445	0.768302	0.755929	0.419374	0.391876	0.652771	0.764928	0.55105	0.619453	0.225311	0.783681	0.571159	0.587815	0.614643	0.387382	0.607414
GSM2235729	0.379588	0.721171	0.7632	0.724742	0.684151	0.663672	0.388295	0.739869	0.454272	0.759278	0.793861	0.596909	0.436034	0.690254	0.734185	0.561384	0.640655	0.204086	0.758402	0.633691	0.605223	0.611352	0.452988	0.582536
GSM2235730	0.239982	0.713405	0.588032	0.67026	0.685584	0.674885	0.337002	0.691605	0.348165	0.736451	0.672497	0.479894	0.380188	0.478717	0.692452	0.542301	0.554772	0.271483	0.677916	0.580097	0.544773	0.534039	0.392608	0.543682
GSM2235731	0.24883	0.724583	0.742763	0.703267	0.654506	0.68142	0.337893	0.662968	0.36646	0.679691	0.660359	0.512336	0.405967	0.469828	0.766204	0.508385	0.60401	0.303797	0.681853	0.499931	0.506659	0.554537	0.35563	0.542183
GSM2235732	0.544576	0.732222	0.78822	0.680273	0.682486	0.666143	0.448131	0.768108	0.542031	0.76282	0.828587	0.39972	0.372861	0.608669	0.746902	0.538538	0.622541	0.36556	0.774516	0.622668	0.628887	0.588592	0.397592	0.597925
GSM2235733	0.206619	0.691526	0.668111	0.753576	0.720654	0.684762	0.296935	0.696028	0.420446	0.772553	0.805542	0.408473	0.419169	0.58739	0.727226	0.594227	0.657163	0.233279	0.737346	0.627965	0.573539	0.588937	0.437996	0.60004
GSM2235734	0.25019	0.645669	0.576025	0.677234	0.674201	0.683949	0.347576	0.688338	0.378304	0.721611	0.718641	0.37109	0.406791	0.605697	0.74516	0.53677	0.580969	0.250896	0.699383	0.50668	0.603602	0.570345	0.434991	0.534401
GSM2235735	0.33901	0.714758	0.568313	0.796437	0.652252	0.663631	0.455762	0.713041	0.486019	0.799033	0.772068	0.453582	0.353817	0.587975	0.712277	0.556155	0.603622	0.602485	0.768692	0.575339	0.509041	0.577538	0.493038	0.629803
GSM2235736	0.10973	0.601008	0.496541	0.62719	0.697216	0.668933	0.299222	0.675367	0.297617	0.68219	0.515938	0.625085	0.43191	0.380571	0.710973	0.475721	0.533297	0.240785	0.724214	0.462951	0.470912	0.471599	0.38449	0.576792
GSM2235737	0.712447	0.70166	0.693281	0.747674	0.666346	0.64706	0.465173	0.732108	0.610816	0.756992	0.823034	0.608446	0.419765	0.585798	0.75229	0.568253	0.628009	0.398209	0.775791	0.648275	0.632721	0.594086	0.473624	0.566916
GSM2235738	0.133201	0.708559	0.615632	0.705505	0.608338	0.651934	0.333425	0.683324	0.307304	0.711871	0.624405	0.438544	0.4664	0.402726	0.748869	0.520099	0.609019	0.196211	0.731896	0.550126	0.540562	0.527837	0.388708	0.551264
GSM2235739	0.121356	0.637909	0.506136	0.674062	0.665837	0.681632	0.347026	0.67917	0.271974	0.721769	0.594134	0.362481	0.381867	0.573605	0.728494	0.548543	0.560366	0.249664	0.681573	0.472004	0.539714	0.511164	0.40454	0.56396
GSM2235740	0.355011	0.616022	0.662562	0.714645	0.682909	0.687857	0.440258	0.63858	0.422292	0.715936	0.622313	0.41746	0.452425	0.403977	0.758513	0.501953	0.58333	0.450047	0.713742	0.506113	0.529791	0.558681	0.491607	0.547304
GSM2235741	0.110905	0.669753	0.511957	0.675331	0.660204	0.650832	0.235129	0.680591	0.355267	0.681929	0.688312	0.380669	0.559741	0.441184	0.693378	0.496413	0.609611	0.173154	0.708792	0.561174	0.579281	0.519372	0.329307	0.559784
GSM2235742	0.3607	0.727603	0.692837	0.706942	0.653566	0.686506	0.343534	0.716503	0.446326	0.732128	0.740467	0.359703	0.483709	0.474134	0.726047	0.54215	0.648601	0.102713	0.731272	0.612276	0.61089	0.557788	0.39682	0.508901
GSM2235743	0.260895	0.708016	0.699566	0.736969	0.709139	0.680778	0.419738	0.722961	0.389633	0.758684	0.789357	0.475019	0.4238	0.562436	0.754829	0.568338	0.598564	0.232952	0.759804	0.69684	0.570866	0.588944	0.419378	0.551848
GSM2235744	0.303382	0.552634	0.603927	0.679904	0.681878	0.689535	0.34928	0.681612	0.358149	0.752087	0.63549	0.369977	0.433816	0.553015	0.745976	0.51386	0.579388	0.125397	0.749533	0.526587	0.562822	0.573929	0.410078	0.521331
GSM2235745	0.450271	0.725482	0.819978	0.752045	0.678052	0.600793	0.334136	0.672282	0.463666	0.719414	0.76641	0.708102	0.42623	0.532173	0.733782	0.559126	0.652057	0.183403	0.722598	0.577675	0.570076	0.580452	0.433381	0.583936
GSM2235746	0.406287	0.63382	0.749747	0.681759	0.749261	0.639326	0.397917	0.721372	0.423192	0.708786	0.682772	0.408891	0.306627	0.563204	0.719469	0.438282	0.575536	0.222509	0.718198	0.524844	0.528344	0.559233	0.428345	0.52376
GSM2235747	0.12539	0.693748	0.637607	0.729259	0.661178	0.674182	0.351328	0.752187	0.318099	0.753384	0.732127	0.345514	0.433383	0.522352	0.722902	0.576283	0.631126	0.236768	0.748286	0.705308	0.591215	0.58302	0.387386	0.599225
GSM2235748	0.298204	0.774946	0.642194	0.672464	0.626966	0.715136	0.357156	0.732564	0.360989	0.758184	0.66052	0.333527	0.518809	0.481037	0.717709	0.592316	0.649324	0.144863	0.777797	0.554889	0.570626	0.607023	0.412636	0.626672
GSM2235749	0.293397	0.633064	0.546705	0.636152	0.655732	0.691143	0.345098	0.619214	0.359334	0.698834	0.558864	0.34212	0.439469	0.40252	0.729387	0.501649	0.535366	0.250686	0.748498	0.547179	0.507871	0.50971	0.363707	0.572749
GSM2235750	0.143897	0.622318	0.533924	0.67577	0.671138	0.696148	0.302172	0.7344	0.319276	0.730129	0.692112	0.451967	0.428484	0.485703	0.707966	0.582246	0.606467	0.203173	0.730948	0.579318	0.585692	0.572689	0.438705	0.545342
GSM2235751	0.264944	0.741344	0.781881	0.714445	0.77	0.602242	0.432337	0.71498	0.451709	0.779154	0.811471	0.462447	0.341325	0.552176	0.729386	0.547844	0.592581	0.16436	0.699895	0.717531	0.626815	0.575452	0.429743	0.603608
GSM2235752	0.433443	0.730021	0.791704	0.761892	0.704781	0.644418	0.343883	0.704962	0.496852	0.767307	0.771926	0.396788	0.382178	0.487544	0.759649	0.521662	0.616773	0.419602	0.727806	0.560663	0.566554	0.580605	0.509994	0.610871
GSM2235753	0.489708	0.708121	0.788223	0.719743	0.658917	0.681038	0.410195	0.70736	0.485267	0.729632	0.856869	0.429004	0.315172	0.583329	0.76473	0.546262	0.63873	0.200986	0.76228	0.616176	0.648312	0.577643	0.426826	0.555326
GSM2235754	0.175993	0.584355	0.584738	0.705621	0.689703	0.666448	0.393789	0.793151	0.407324	0.793703	0.808471	0.343888	0.262911	0.671988	0.732095	0.576239	0.642233	0.366843	0.782374	0.732116	0.633487	0.613508	0.36173	0.546893
GSM2235755	0.393332	0.537621	0.717499	0.663481	0.663685	0.604675	0.397987	0.663495	0.427658	0.727494	0.690972	0.319706	0.38765	0.607416	0.695357	0.508461	0.615039	0.104585	0.754591	0.548064	0.578566	0.615064	0.410395	0.548513
GSM2235756	0.545439	0.661032	0.733227	0.69426	0.71384	0.658792	0.421536	0.73403	0.490947	0.771562	0.83419	0.374635	0.32909	0.65631	0.748038	0.566264	0.614841	0.181233	0.765907	0.656581	0.600419	0.59887	0.374363	0.545391
GSM2235757	0.321249	0.709605	0.60906	0.675835	0.684541	0.652182	0.336506	0.75111	0.428482	0.791346	0.750289	0.546813	0.406474	0.533764	0.711824	0.567188	0.628153	0.164894	0.758036	0.633681	0.602213	0.556401	0.364192	0.557767
GSM2235758	0.135484	0.567706	0.535655	0.710304	0.682167	0.663586	0.213447	0.655807	0.310199	0.703828	0.707619	0.466788	0.293677	0.432642	0.717568	0.4976	0.571596	0.296602	0.721581	0.509284	0.554136	0.538939	0.495284	0.558159
GSM2235759	0.263743	0.553039	0.664102	0.693908	0.680479	0.643527	0.313542	0.752656	0.408125	0.763217	0.800544	0.394108	0.43108	0.556902	0.7333	0.596481	0.658569	0.272821	0.767242	0.615686	0.6202	0.58884	0.35433	0.499953
GSM2235760	0.163556	0.656756	0.611705	0.658456	0.654939	0.647112	0.291416	0.686688	0.320179	0.737655	0.601163	0.369679	0.341755	0.47721	0.748465	0.525163	0.593881	0.11858	0.747386	0.519796	0.57672	0.548021	0.406853	0.537904
GSM2235761	0.502002	0.637905	0.717401	0.690169	0.707381	0.677643	0.443536	0.668101	0.465675	0.753761	0.729875	0.30945	0.456138	0.559236	0.750126	0.527908	0.594859	0.131493	0.773339	0.567691	0.573285	0.619906	0.368202	0.55236
GSM2235762	0.234094	0.668692	0.59939	0.705508	0.673998	0.686737	0.286269	0.707087	0.360616	0.726376	0.783747	0.450958	0.396265	0.559612	0.745957	0.539205	0.586388	0.210075	0.714701	0.610567	0.577293	0.567281	0.467091	0.552105
GSM2235763	0.5257	0.746301	0.765594	0.699019	0.671652	0.640102	0.338545	0.699551	0.512686	0.736357	0.733222	0.41275	0.37203	0.46972	0.760206	0.502395	0.607866	0.35834	0.726454	0.556117	0.602904	0.576018	0.437539	0.623994
GSM2235764	0.219031	0.652893	0.628116	0.727637	0.70606	0.653928	0.424823	0.675759	0.319529	0.740719	0.641433	0.448381	0.445696	0.471747	0.722942	0.512303	0.571675	0.295827	0.732823	0.511172	0.52851	0.556476	0.456026	0.63247
GSM2235765	0.379466	0.569648	0.638649	0.694288	0.671158	0.664852	0.265929	0.674756	0.426395	0.746246	0.765136	0.397107	0.469763	0.530679	0.745353	0.551044	0.678126	0.258456	0.757027	0.57527	0.604548	0.602201	0.45291	0.471282
GSM2235766	0.22844	0.66987	0.546776	0.653721	0.656431	0.682884	0.304995	0.688354	0.251194	0.740264	0.582725	0.423738	0.52089	0.420456	0.726216	0.49465	0.61309	0.343724	0.721831	0.516166	0.529236	0.529454	0.37236	0.529241
GSM2235767	0.298104	0.492464	0.636648	0.651742	0.65669	0.610773	0.332379	0.692613	0.355082	0.740607	0.695603	0.299071	0.351369	0.661427	0.709956	0.519799	0.634776	0.188495	0.752095	0.518478	0.567539	0.590918	0.386716	0.507225
GSM2235768	0.456226	0.767531	0.854956	0.76747	0.76178	0.652559	0.428372	0.807241	0.55341	0.791696	0.92556	0.622834	0.390862	0.607879	0.755965	0.618182	0.681776	0.380482	0.766539	0.718441	0.66325	0.66999	0.453376	0.575204
GSM2235769	0.194015	0.650879	0.536624	0.666472	0.696154	0.660978	0.240536	0.72495	0.288159	0.767758	0.686436	0.385873	0.389847	0.444528	0.704787	0.522889	0.589661	0.307581	0.716134	0.543834	0.549841	0.50894	0.388945	0.507143
GSM2235770	0.294668	0.69325	0.677491	0.742699	0.686521	0.662152	0.361851	0.63973	0.354566	0.771188	0.656765	0.277908	0.582151	0.631171	0.724661	0.530438	0.635537	0.227873	0.76	0.501247	0.566348	0.567657	0.397788	0.580433
GSM2235771	0.408591	0.7042	0.673311	0.714219	0.7112	0.657014	0.34447	0.671692	0.444629	0.773758	0.691835	0.257821	0.534357	0.590572	0.701248	0.526316	0.641326	0.156922	0.771254	0.548618	0.561532	0.594202	0.38456	0.59836
GSM2235772	0.477833	0.770715	0.666613	0.693111	0.702804	0.661024	0.369737	0.691871	0.477719	0.764467	0.7064	0.307431	0.497649	0.568966	0.709703	0.550816	0.648739	0.156245	0.744755	0.54855	0.553382	0.59816	0.387166	0.625615
GSM2235773	0.389349	0.73184	0.676726	0.740356	0.714573	0.66787	0.313922	0.68755	0.44947	0.763343	0.699185	0.378202	0.49648	0.555246	0.706704	0.557496	0.650857	0.126674	0.74631	0.567257	0.547794	0.596586	0.424083	0.601852
GSM2235774	0.237187	0.638043	0.657129	0.744926	0.713056	0.677868	0.252888	0.681761	0.385385	0.758927	0.675624	0.441538	0.488687	0.574882	0.74215	0.559961	0.628116	0.165263	0.749749	0.56984	0.554917	0.588415	0.426307	0.574219
GSM2235775	0.249384	0.652219	0.717775	0.754621	0.691306	0.653467	0.280029	0.695436	0.392612	0.769992	0.723795	0.352057	0.604746	0.589134	0.720058	0.554676	0.644035	0.175281	0.760003	0.571971	0.553446	0.596971	0.424616	0.606606
GSM2235776	0.276711	0.650943	0.711292	0.753914	0.69875	0.672786	0.285699	0.704879	0.419173	0.768629	0.711199	0.340172	0.482064	0.57402	0.724813	0.550946	0.64952	0.152045	0.767823	0.575019	0.551111	0.600877	0.437284	0.595546
GSM2235777	0.355743	0.724246	0.795282	0.758062	0.725462	0.677711	0.30733	0.720744	0.472689	0.780616	0.787238	0.329055	0.470881	0.569402	0.74045	0.599836	0.654614	0.143641	0.75618	0.631859	0.577642	0.612034	0.410438	0.618279
GSM2235778	0.175531	0.626676	0.575611	0.68526	0.661875	0.668937	0.26103	0.700396	0.265755	0.750271	0.675795	0.382385	0.300026	0.479875	0.735698	0.573599	0.611408	0.206673	0.744298	0.57236	0.55001	0.552736	0.436307	0.526823
GSM2235779	0.264995	0.698119	0.780756	0.714418	0.717952	0.635744	0.247099	0.735248	0.436867	0.730629	0.711448	0.510251	0.393927	0.471601	0.752264	0.615791	0.60441	0.222305	0.720047	0.555208	0.617046	0.597413	0.434119	0.641896
GSM2235780	0.295815	0.675259	0.834259	0.730146	0.673174	0.667771	0.321622	0.71664	0.42264	0.715838	0.735537	0.39835	0.424532	0.481382	0.752631	0.548089	0.633544	0.334093	0.729396	0.545729	0.592305	0.599187	0.462579	0.614113
GSM2235781	0.298028	0.660655	0.637448	0.674959	0.680517	0.636315	0.345321	0.72694	0.346514	0.756991	0.688858	0.495412	0.376694	0.565528	0.71077	0.530792	0.60331	0.299145	0.759073	0.589769	0.551401	0.537112	0.390521	0.539334
GSM2235782	0.337962	0.623683	0.668143	0.695142	0.787385	0.638109	0.257047	0.744022	0.418075	0.810661	0.785923	0.522487	0.421796	0.55191	0.704773	0.581521	0.640976	0.169911	0.74333	0.656676	0.587699	0.606281	0.313812	0.559178
GSM2235783	0.409282	0.621839	0.699235	0.703796	0.689912	0.672875	0.347866	0.661392	0.378627	0.742947	0.703503	0.343352	0.454866	0.56403	0.744587	0.54997	0.606332	0.259675	0.752436	0.529961	0.571542	0.582218	0.425222	0.535652
GSM2235784	0.354703	0.788429	0.839943	0.765345	0.674433	0.701542	0.296295	0.709229	0.461706	0.763615	0.846318	0.599603	0.416978	0.473422	0.777469	0.599254	0.634949	0.280983	0.761063	0.619227	0.595907	0.622037	0.442303	0.60627
GSM2235785	0.483531	0.80584	0.884681	0.769998	0.703287	0.641126	0.37674	0.766985	0.574163	0.746363	0.890276	0.586	0.363417	0.649701	0.803222	0.608169	0.674858	0.424248	0.776984	0.671516	0.662152	0.64418	0.476024	0.631627
GSM2235786	0.752681	0.65695	0.746274	0.682368	0.690244	0.659513	0.466881	0.653713	0.57817	0.750248	0.793209	0.321585	0.422117	0.542212	0.770303	0.541067	0.628375	0.156837	0.786518	0.590385	0.631934	0.650898	0.42857	0.533971
GSM2235787	0.352723	0.71198	0.64955	0.686724	0.684732	0.669724	0.360157	0.660101	0.41346	0.747093	0.647739	0.314414	0.384705	0.545836	0.714935	0.514054	0.634887	0.115371	0.761467	0.552389	0.565992	0.598711	0.475195	0.563221
GSM2235788	0.625006	0.861186	0.859361	0.719532	0.674953	0.655653	0.329999	0.742931	0.601158	0.739844	0.844053	0.462018	0.329015	0.572364	0.733152	0.56378	0.626618	0.282773	0.719003	0.641814	0.639421	0.608823	0.443211	0.610801
GSM2235789	0.420514	0.721846	0.783111	0.710168	0.694919	0.671557	0.343626	0.704618	0.464884	0.734307	0.715776	0.399247	0.330069	0.51364	0.737583	0.537158	0.648807	0.199709	0.725548	0.575263	0.586898	0.599718	0.486816	0.614026
GSM2235790	0.670768	0.748754	0.700474	0.720925	0.700881	0.663908	0.408722	0.688172	0.573508	0.766456	0.728686	0.372321	0.444907	0.481513	0.711004	0.518504	0.605658	0.236676	0.740722	0.572964	0.600069	0.589732	0.443999	0.565904
GSM2235791	0.341775	0.6754	0.686634	0.663769	0.710561	0.671657	0.442185	0.683643	0.449344	0.735116	0.765687	0.317491	0.294194	0.616255	0.715575	0.55282	0.640036	0.0711868	0.767832	0.574801	0.636445	0.644397	0.428548	0.603215
GSM2235792	0.228214	0.708689	0.612827	0.685579	0.708484	0.646895	0.298396	0.753084	0.392306	0.796336	0.698111	0.325021	0.281813	0.525613	0.701424	0.525611	0.593481	0.0911	0.725499	0.633604	0.584949	0.588234	0.42625	0.630519
GSM2235793	0.4172	0.638355	0.676861	0.662953	0.689789	0.638561	0.440931	0.770344	0.414719	0.767474	0.770931	0.487056	0.273243	0.692382	0.753731	0.577809	0.650444	0.218405	0.797433	0.62469	0.627391	0.628385	0.392432	0.595377
GSM2235794	0.349885	0.755926	0.758077	0.676711	0.699522	0.621168	0.318605	0.75553	0.427732	0.753497	0.769611	0.312233	0.333084	0.571064	0.697907	0.542052	0.636372	0.237323	0.728484	0.619348	0.594291	0.598375	0.413436	0.625851
GSM2235795	0.196434	0.63215	0.566825	0.710194	0.713893	0.627582	0.354047	0.768573	0.34308	0.784463	0.744504	0.577173	0.315558	0.565147	0.732009	0.588287	0.611975	0.2546	0.79552	0.671663	0.553509	0.572561	0.41363	0.597908
GSM2235796	0.350342	0.665965	0.698256	0.711747	0.693677	0.618759	0.43532	0.752414	0.39786	0.753913	0.819894	0.45266	0.369912	0.704337	0.740625	0.586078	0.603189	0.31575	0.810949	0.615461	0.621511	0.632501	0.37505	0.5724
GSM2235797	0.231514	0.683325	0.728804	0.662525	0.723592	0.633719	0.289942	0.698641	0.424551	0.71976	0.725761	0.452806	0.225421	0.510184	0.753946	0.594107	0.59011	0.23403	0.683947	0.549553	0.610115	0.579226	0.478652	0.591421
GSM2235798	0.210868	0.655061	0.596708	0.671289	0.702363	0.641528	0.279458	0.684103	0.364525	0.744693	0.669989	0.43073	0.292362	0.491019	0.740934	0.520605	0.611828	0.32601	0.720078	0.540464	0.539395	0.540449	0.447218	0.55694
GSM2235799	0.275655	0.739213	0.613365	0.682228	0.739519	0.664208	0.257793	0.708132	0.368727	0.741922	0.724254	0.557165	0.360557	0.505717	0.727362	0.538094	0.561532	0.185592	0.712497	0.5517	0.568838	0.559262	0.407622	0.580511
GSM2235800	0.596835	0.701472	0.864032	0.720745	0.702149	0.666987	0.42524	0.681921	0.502799	0.731077	0.805781	0.386782	0.414648	0.54575	0.722939	0.558863	0.640408	0.205221	0.783485	0.608206	0.613808	0.637882	0.443085	0.582892
GSM2235801	0.609108	0.652928	0.765615	0.722969	0.716775	0.673797	0.418857	0.688224	0.506927	0.773492	0.782659	0.390318	0.428047	0.580434	0.783347	0.51471	0.602269	0.188375	0.793233	0.551874	0.581201	0.616481	0.433327	0.579746
GSM2235802	0.462374	0.83602	0.784318	0.703355	0.734647	0.609906	0.386218	0.794657	0.54233	0.766349	0.806463	0.628734	0.394608	0.506096	0.692077	0.570078	0.626848	0.162781	0.721767	0.694132	0.611685	0.588726	0.469522	0.639719
GSM2235803	0.364815	0.778597	0.701553	0.677084	0.665803	0.671727	0.30509	0.694999	0.413117	0.694369	0.639998	0.347517	0.265273	0.429453	0.724179	0.519331	0.63323	0.275249	0.707639	0.589364	0.602434	0.598987	0.40013	0.607094
GSM2235804	0.227805	0.591729	0.691537	0.746071	0.66801	0.663419	0.310566	0.697503	0.388032	0.770959	0.687413	0.268498	0.437004	0.529849	0.710179	0.523713	0.633581	0.223731	0.770484	0.569134	0.60055	0.598624	0.479997	0.571133
GSM2235805	0.222027	0.568117	0.550389	0.690642	0.659217	0.658543	0.380161	0.665356	0.327433	0.767427	0.604084	0.373821	0.408807	0.557439	0.706144	0.51399	0.678986	0.1517	0.763819	0.506385	0.58563	0.594468	0.429729	0.59553
GSM2235806	0.16575	0.65343	0.574181	0.709804	0.668944	0.668297	0.372042	0.660562	0.276487	0.743653	0.654513	0.309721	0.490891	0.390667	0.737037	0.492417	0.545486	0.199934	0.75919	0.475883	0.545274	0.543047	0.461355	0.587797
GSM2235807	0.242125	0.669866	0.603872	0.695357	0.694361	0.679877	0.329542	0.695878	0.327691	0.750545	0.621559	0.359131	0.397325	0.549368	0.707205	0.508877	0.613514	0.186252	0.723999	0.516218	0.50995	0.584734	0.423893	0.615211
GSM2235808	0.355814	0.744269	0.700427	0.746232	0.652418	0.683306	0.332072	0.686349	0.459816	0.77643	0.702935	0.336824	0.454792	0.422253	0.739054	0.533083	0.66346	0.26005	0.742827	0.653298	0.580352	0.568003	0.425596	0.574219
GSM2235809	0.406257	0.76167	0.839413	0.773101	0.657064	0.65059	0.407645	0.708317	0.464425	0.793726	0.799639	0.344256	0.437336	0.53521	0.727278	0.550263	0.61775	0.455191	0.76473	0.596952	0.606958	0.60055	0.426865	0.635476
GSM2235810	0.187503	0.698314	0.567761	0.708879	0.645142	0.664784	0.272549	0.714924	0.328489	0.72412	0.653144	0.458339	0.178559	0.543317	0.731087	0.531729	0.627626	0.2586	0.68612	0.57026	0.543295	0.56773	0.461657	0.62222
GSM2235811	0.292877	0.754258	0.671169	0.683275	0.678341	0.585695	0.359201	0.735284	0.421097	0.733602	0.76553	0.499792	0.237437	0.550757	0.710343	0.518732	0.626084	0.200728	0.69765	0.610567	0.576761	0.569487	0.442672	0.625328
GSM2235812	0.162245	0.668497	0.63559	0.69365	0.65468	0.650612	0.264942	0.71991	0.324785	0.733056	0.565092	0.429775	0.307951	0.381679	0.723519	0.518931	0.57263	0.137678	0.691249	0.505505	0.549295	0.560266	0.442294	0.585338
GSM2235813	0.48725	0.716402	0.688176	0.703598	0.682637	0.681834	0.394465	0.668956	0.454157	0.758804	0.747559	0.362823	0.498469	0.505327	0.774973	0.511933	0.615517	0.296381	0.712544	0.58075	0.54765	0.58514	0.427978	0.572563
GSM2235814	0.708429	0.786677	0.803315	0.720467	0.687285	0.634941	0.408914	0.681177	0.585498	0.758644	0.759152	0.345083	0.258922	0.538688	0.72613	0.573069	0.619525	0.0603391	0.701422	0.616051	0.604181	0.60898	0.445748	0.600957
GSM2235815	0.276906	0.706379	0.659646	0.654298	0.630259	0.643485	0.32676	0.71383	0.339116	0.69285	0.659994	0.500752	0.298132	0.517523	0.705484	0.532142	0.546518	0.254771	0.704762	0.574327	0.568706	0.538182	0.41299	0.584875
GSM2235816	0.519811	0.708239	0.75729	0.754746	0.681562	0.63928	0.382624	0.706736	0.487337	0.776001	0.805628	0.423476	0.421384	0.560063	0.768159	0.543975	0.634802	0.331766	0.750333	0.540536	0.576806	0.618817	0.40554	0.623246
GSM2235817	0.21321	0.657141	0.658456	0.701057	0.66432	0.651225	0.274767	0.68269	0.38776	0.752616	0.750735	0.738076	0.28474	0.427392	0.720492	0.500463	0.614159	0.500547	0.729375	0.52041	0.545429	0.532852	0.525318	0.565484
GSM2235818	0.337147	0.767929	0.821135	0.786429	0.738731	0.626211	0.409329	0.779957	0.487452	0.777384	0.880324	0.477185	0.40794	0.571303	0.750113	0.631999	0.653121	0.295121	0.742241	0.663024	0.625648	0.605965	0.453907	0.667671
GSM2235819	0.223205	0.629492	0.560282	0.703802	0.677196	0.663857	0.239619	0.678961	0.343407	0.727363	0.695728	0.518912	0.278661	0.475313	0.713055	0.565244	0.60612	0.222469	0.738141	0.590821	0.531676	0.571736	0.393354	0.552312
GSM2235820	0.701211	0.658843	0.767065	0.713758	0.680181	0.636551	0.384053	0.692036	0.561561	0.741683	0.82646	0.407154	0.288883	0.575601	0.743922	0.575115	0.626672	0.172883	0.75891	0.609964	0.625609	0.642935	0.408119	0.554509
GSM2235821	0.375367	0.752531	0.820795	0.710819	0.734886	0.633125	0.300796	0.732403	0.454499	0.758991	0.78648	0.654843	0.420435	0.481452	0.734868	0.536661	0.610626	0.194277	0.718566	0.585665	0.585162	0.562961	0.462631	0.584953
GSM2235822	0.170722	0.66368	0.573125	0.685061	0.706679	0.656377	0.244357	0.687255	0.338948	0.777078	0.678654	0.423912	0.363218	0.439386	0.773081	0.539948	0.579709	0.252659	0.710726	0.581095	0.563657	0.529032	0.347807	0.544704
GSM2235823	0.580583	0.662592	0.780534	0.723442	0.720381	0.664615	0.426464	0.665345	0.4813	0.748341	0.778461	0.62735	0.429523	0.575073	0.761235	0.552575	0.63706	0.123879	0.777156	0.585315	0.601716	0.63409	0.453306	0.565713
GSM2235824	0.571217	0.59991	0.753405	0.687164	0.701825	0.660921	0.366372	0.649099	0.482361	0.754584	0.734396	0.34656	0.497646	0.53853	0.733567	0.530046	0.653054	0.112656	0.796924	0.583817	0.593244	0.617087	0.421143	0.558968
GSM2235825	0.233182	0.631585	0.575276	0.66454	0.70737	0.6897	0.375429	0.698205	0.364344	0.753782	0.747327	0.475649	0.401839	0.627502	0.724743	0.571655	0.648699	0.250626	0.746987	0.578737	0.573273	0.572663	0.406072	0.588927
GSM2235826	0.22164	0.697429	0.601392	0.694637	0.726851	0.63613	0.249446	0.723067	0.34106	0.720718	0.650581	0.715223	0.352982	0.486804	0.687361	0.587568	0.632712	0.153519	0.726179	0.572793	0.549208	0.546769	0.391387	0.64019
GSM2235827	0.482558	0.579356	0.719117	0.683214	0.689802	0.638833	0.30142	0.675261	0.440661	0.737521	0.749398	0.337824	0.424497	0.627137	0.71964	0.542402	0.631855	0.0415945	0.773369	0.541157	0.57949	0.608842	0.39715	0.557035
GSM2235828	0.385203	0.811553	0.852695	0.74773	0.751242	0.627255	0.458227	0.821956	0.555755	0.773264	0.949544	0.328374	0.351455	0.570503	0.735709	0.653354	0.742991	0.249307	0.789313	0.770944	0.695619	0.691135	0.47469	0.687365
GSM2235829	0.424068	0.773351	0.745805	0.725437	0.672657	0.650747	0.304561	0.705519	0.477289	0.737502	0.743924	0.338346	0.235545	0.403628	0.760031	0.573069	0.643264	0.289879	0.701088	0.594782	0.577291	0.584036	0.444045	0.61722
GSM2235830	0.150062	0.622957	0.517308	0.674585	0.661081	0.637814	0.258009	0.628694	0.355847	0.727997	0.503506	0.336816	0.367547	0.434009	0.720309	0.505357	0.623052	0.302085	0.697151	0.463519	0.512093	0.546332	0.454509	0.544934
GSM2235831	0.269005	0.663815	0.562526	0.675161	0.659281	0.644728	0.246857	0.706221	0.38653	0.733242	0.587314	0.379816	0.495777	0.473521	0.695491	0.51366	0.587832	0.272665	0.719277	0.532341	0.535856	0.55872	0.433885	0.610511
GSM2235837	0.449645	0.721174	0.724247	0.691939	0.649171	0.659685	0.323473	0.735905	0.493054	0.733973	0.732038	0.270642	0.280351	0.54147	0.726737	0.607958	0.649981	0.267163	0.735295	0.660052	0.644631	0.554342	0.483248	0.581659
GSM2235838	0.293649	0.648	0.617016	0.694833	0.594794	0.6966	0.352056	0.646828	0.313666	0.76534	0.592182	0.229163	0.435615	0.428635	0.7408	0.520901	0.625429	0.152761	0.753088	0.49214	0.531909	0.56169	0.373358	0.545844
GSM2235839	0.433477	0.713987	0.635693	0.674562	0.640262	0.685024	0.30876	0.679343	0.437573	0.697687	0.612973	0.241597	0.331988	0.394192	0.744941	0.573082	0.653957	0.176699	0.713462	0.573105	0.52848	0.595344	0.480614	0.57572
GSM2235840	0.189029	0.695896	0.57663	0.688758	0.686539	0.617473	0.253036	0.712971	0.291195	0.701709	0.698776	0.506314	0.322491	0.454394	0.712821	0.519585	0.545694	0.23711	0.731574	0.544715	0.534591	0.515334	0.446929	0.619099
GSM2235841	0.342539	0.686886	0.679717	0.70033	0.710202	0.649826	0.406219	0.747719	0.454104	0.787353	0.826308	0.295808	0.31188	0.601342	0.746283	0.580303	0.632232	0.395243	0.754185	0.645233	0.606471	0.596205	0.456823	0.62342
GSM2235842	0.163932	0.657325	0.539522	0.653343	0.702089	0.608631	0.301442	0.72596	0.343462	0.748562	0.577933	0.435762	0.33957	0.541248	0.674012	0.531486	0.60684	0.279968	0.73193	0.525687	0.563412	0.539996	0.409454	0.615177
GSM2235843	0.435141	0.681108	0.684068	0.710377	0.707647	0.598849	0.33881	0.763371	0.457457	0.754216	0.82291	0.439679	0.287555	0.651734	0.755805	0.572842	0.621961	0.192022	0.752555	0.62823	0.625976	0.593836	0.476018	0.562659
GSM2235844	0.328873	0.751201	0.755414	0.710064	0.664583	0.659636	0.265566	0.712141	0.470494	0.756977	0.737237	0.307936	0.229289	0.406524	0.7405	0.572253	0.64424	0.194526	0.733214	0.55227	0.572468	0.578649	0.499822	0.565437
GSM2235845	0.315868	0.737057	0.718569	0.737978	0.644967	0.668112	0.297888	0.713611	0.454712	0.768698	0.74085	0.220509	0.24015	0.41029	0.743557	0.565899	0.642395	0.176437	0.744244	0.557742	0.581203	0.561529	0.499269	0.570854
GSM2235846	0.252164	0.646542	0.619825	0.690949	0.645399	0.592731	0.323456	0.687971	0.361369	0.739881	0.679281	0.429918	0.352792	0.508772	0.728626	0.544704	0.602954	0.273802	0.769061	0.572167	0.606144	0.589851	0.487443	0.572206
GSM2235847	0.494659	0.783194	0.87852	0.755037	0.694981	0.654254	0.359934	0.769552	0.497105	0.763028	0.895248	0.398605	0.430751	0.558345	0.737096	0.590466	0.669922	0.337995	0.757781	0.637909	0.633183	0.652822	0.420254	0.642966
GSM2235848	0.487575	0.585004	0.707888	0.670374	0.675391	0.611504	0.384971	0.674508	0.445251	0.719961	0.746031	0.293804	0.447062	0.581066	0.731068	0.548132	0.645652	0.080631	0.76038	0.543726	0.61739	0.61661	0.41152	0.541767
GSM2235849	0.524264	0.706697	0.704832	0.683802	0.736978	0.634997	0.373338	0.718829	0.422983	0.744084	0.713773	0.407662	0.338853	0.540186	0.728784	0.553084	0.602483	0.215026	0.728075	0.582665	0.58063	0.59691	0.406181	0.590347
GSM2235850	0.672597	0.676048	0.733912	0.700934	0.715194	0.657652	0.454824	0.710707	0.543327	0.760388	0.81946	0.360824	0.422943	0.593336	0.760734	0.56024	0.624943	0.17803	0.75384	0.619379	0.588549	0.608831	0.39092	0.557863
GSM2235851	0.451255	0.674581	0.655173	0.702443	0.685039	0.625145	0.26046	0.695797	0.440236	0.717233	0.741998	0.452454	0.30633	0.485171	0.798681	0.496782	0.597081	0.399143	0.732189	0.58537	0.518321	0.576229	0.462558	0.61567
GSM2235852	0.887677	0.758813	0.867749	0.754424	0.700387	0.683305	0.48998	0.677173	0.712195	0.719348	0.80045	0.362786	0.542022	0.403481	0.793867	0.574342	0.595324	0.190738	0.782561	0.65484	0.603965	0.657163	0.409473	0.56595
GSM2235853	0.568061	0.764922	0.843613	0.750039	0.731188	0.681827	0.35806	0.711692	0.512667	0.746741	0.817446	0.698751	0.483071	0.575922	0.777216	0.543926	0.636998	0.241851	0.743436	0.555803	0.583682	0.622585	0.45656	0.616628
GSM2235854	0.43413	0.742745	0.742195	0.722165	0.717938	0.685927	0.368364	0.755904	0.42549	0.768629	0.741569	0.521123	0.454812	0.552444	0.745518	0.557769	0.605171	0.0512245	0.759513	0.606128	0.611415	0.593795	0.438628	0.619812
GSM2235855	0.921291	0.828631	0.931718	0.737304	0.741561	0.661891	0.465729	0.755077	0.7302	0.727345	0.94867	0.534503	0.353123	0.594903	0.810928	0.564956	0.625327	0.151409	0.762464	0.687549	0.673145	0.638112	0.43097	0.62398
GSM2235862	0.451408	0.801084	0.885099	0.727558	0.658292	0.702627	0.377518	0.737239	0.48939	0.736171	0.869063	0.534371	0.365125	0.56153	0.736957	0.627367	0.649103	0.338055	0.742411	0.626877	0.624246	0.658244	0.429112	0.621401
GSM2235863	0.265177	0.591439	0.629306	0.683947	0.683768	0.660019	0.339657	0.719299	0.40712	0.768891	0.796147	0.51182	0.367852	0.564171	0.725188	0.547273	0.625515	0.281747	0.757937	0.559123	0.603406	0.607288	0.422054	0.588565
GSM2235864	0.382343	0.620751	0.676037	0.689166	0.686604	0.656433	0.277169	0.694463	0.386187	0.735853	0.708798	0.452273	0.24325	0.512472	0.721393	0.536166	0.583749	0.281788	0.730688	0.501514	0.538567	0.599226	0.433666	0.601605
GSM2235865	0.221611	0.635772	0.58196	0.679993	0.653727	0.64423	0.235856	0.731855	0.272267	0.753184	0.659438	0.362957	0.353076	0.506175	0.72053	0.501863	0.557986	0.461744	0.727392	0.503839	0.522188	0.564478	0.419178	0.603128
GSM2235866	0.295602	0.682357	0.696409	0.743785	0.709739	0.680866	0.246712	0.744126	0.444647	0.783955	0.883765	0.479404	0.319709	0.569303	0.737253	0.593509	0.667604	0.349405	0.748282	0.681005	0.613053	0.632521	0.437054	0.587199
GSM2235867	0.325205	0.68347	0.791804	0.728804	0.720486	0.633699	0.31804	0.760237	0.45114	0.781018	0.8709	0.418051	0.283766	0.604218	0.755027	0.612116	0.643875	0.279574	0.751668	0.648741	0.606821	0.617741	0.441282	0.625214
GSM2235878	0.432942	0.703926	0.749537	0.712007	0.706178	0.674931	0.334642	0.729933	0.429157	0.765917	0.779081	0.549794	0.413896	0.581254	0.785356	0.579511	0.625281	0.414071	0.77089	0.600104	0.58395	0.554285	0.421268	0.591638
GSM2235879	0.22681	0.690477	0.710109	0.717667	0.727956	0.64345	0.2685	0.799198	0.424983	0.789672	0.807772	0.739429	0.290707	0.602207	0.724206	0.62708	0.670201	0.226865	0.761853	0.687584	0.595037	0.608956	0.429813	0.619385
GSM2235880	0.567456	0.700596	0.795152	0.687966	0.72147	0.6802	0.353994	0.733015	0.47531	0.720418	0.798492	0.397907	0.350865	0.570831	0.750828	0.558471	0.599764	0.227294	0.758624	0.555367	0.591856	0.621929	0.458262	0.528866
GSM2235881	0.50387	0.61477	0.645825	0.706786	0.694422	0.650422	0.396143	0.722123	0.431057	0.776746	0.795728	0.385562	0.365884	0.57309	0.758668	0.545388	0.581118	0.375728	0.753348	0.572446	0.588948	0.577616	0.438881	0.560394
GSM2235882	0.677295	0.739117	0.812935	0.736402	0.71471	0.672958	0.423785	0.707042	0.545345	0.753086	0.827871	0.445256	0.345421	0.631332	0.768325	0.571048	0.617945	0.329839	0.772302	0.610235	0.612694	0.608519	0.471044	0.582172
GSM2235883	0.491499	0.69759	0.734688	0.687111	0.718361	0.670083	0.407974	0.700829	0.428473	0.761971	0.774846	0.407657	0.330128	0.650079	0.739361	0.570651	0.605062	0.173507	0.780736	0.600837	0.596404	0.631995	0.436773	0.628698
GSM2235884	0.71165	0.682265	0.801667	0.746647	0.715138	0.679763	0.487741	0.715466	0.576691	0.764264	0.876998	0.376987	0.49009	0.684247	0.790475	0.578845	0.651286	0.255619	0.830047	0.645306	0.669645	0.673616	0.380434	0.597107
GSM2235885	0.355116	0.720155	0.85987	0.781006	0.734624	0.65417	0.381611	0.783281	0.489584	0.823017	0.901237	0.445963	0.450137	0.537776	0.766012	0.669032	0.699384	0.273739	0.794293	0.747262	0.663868	0.668182	0.474137	0.634793
GSM2235886	0.218761	0.688903	0.556372	0.708851	0.711211	0.679763	0.299195	0.771237	0.357608	0.758408	0.70249	0.667254	0.429968	0.567471	0.70241	0.611847	0.633687	0.200119	0.773858	0.645357	0.569197	0.588669	0.383491	0.625856
GSM2235887	0.185509	0.620851	0.565456	0.653033	0.719685	0.623493	0.266645	0.672854	0.272627	0.756164	0.63084	0.332003	0.339875	0.43053	0.710645	0.549916	0.605899	0.268192	0.741057	0.523197	0.591217	0.524855	0.368294	0.593753
GSM2235888	0.554476	0.664204	0.708848	0.695821	0.705012	0.681028	0.420368	0.671122	0.479997	0.731015	0.701328	0.340201	0.407611	0.503246	0.756699	0.510632	0.582308	0.269145	0.766151	0.48571	0.539767	0.596495	0.447837	0.577713
GSM2235889	0.553717	0.658474	0.655207	0.708301	0.690221	0.722686	0.422886	0.619399	0.433829	0.759642	0.695927	0.483026	0.573765	0.480924	0.75556	0.495246	0.607855	0.442983	0.782956	0.495324	0.537596	0.5571	0.378816	0.543372
GSM2235899	0.482351	0.690835	0.75742	0.695381	0.724637	0.692967	0.412968	0.739699	0.498391	0.786614	0.809175	0.483479	0.344833	0.595398	0.750242	0.54865	0.616533	0.300327	0.766503	0.576944	0.61699	0.611723	0.425303	0.615815
GSM2235900	0.507533	0.746014	0.784406	0.705045	0.757036	0.675177	0.346667	0.780792	0.555615	0.778487	0.882865	0.434855	0.255339	0.653959	0.780018	0.59361	0.628983	0.271544	0.734752	0.616443	0.671116	0.645624	0.447924	0.612555
GSM2235901	0.17581	0.637264	0.537088	0.666362	0.721712	0.671073	0.314502	0.717287	0.339397	0.779448	0.67403	0.444838	0.450945	0.54323	0.730066	0.561604	0.611384	0.242929	0.736617	0.591426	0.557367	0.551684	0.345578	0.55725
GSM2235902	0.376246	0.522934	0.734665	0.644177	0.676037	0.612212	0.238802	0.678383	0.45441	0.757387	0.7482	0.37827	0.327072	0.539927	0.707204	0.549299	0.625501	0.087662	0.743514	0.552705	0.595565	0.607674	0.40237	0.567454
GSM2235903	0.172772	0.636205	0.577352	0.694165	0.68638	0.681195	0.304512	0.703349	0.32716	0.71403	0.646686	0.463412	0.390279	0.489024	0.722884	0.550589	0.623821	0.18036	0.779008	0.585602	0.583958	0.566771	0.422021	0.53665
GSM2235904	0.148304	0.584267	0.501342	0.685665	0.686952	0.652701	0.28596	0.679971	0.277494	0.779228	0.649035	0.362917	0.310957	0.541593	0.694245	0.567297	0.594335	0.296365	0.767282	0.514719	0.568548	0.588305	0.401706	0.577711
GSM2235905	0.704928	0.706459	0.814315	0.724724	0.734822	0.660092	0.339028	0.731328	0.589558	0.801528	0.930089	0.424211	0.332432	0.598424	0.761015	0.604936	0.636649	0.201928	0.793696	0.665757	0.662372	0.660022	0.433436	0.593983
GSM2235906	0.234064	0.67056	0.614102	0.723884	0.730433	0.67413	0.315532	0.747555	0.377719	0.765121	0.737808	0.73605	0.329162	0.511992	0.72126	0.573336	0.599765	0.373984	0.764762	0.586105	0.580577	0.571106	0.472995	0.599487
GSM2235907	0.227917	0.733312	0.730909	0.722335	0.71806	0.655322	0.269303	0.765187	0.406628	0.762227	0.748542	0.752125	0.36722	0.520439	0.736728	0.611126	0.621767	0.241396	0.715427	0.623052	0.582504	0.616932	0.47198	0.567219
GSM2235908	0.322581	0.607149	0.651132	0.66828	0.68423	0.662923	0.32158	0.686986	0.357575	0.720709	0.674036	0.452606	0.387523	0.472583	0.727536	0.557504	0.592093	0.209122	0.744574	0.504382	0.542138	0.597989	0.436224	0.601941
GSM2235909	0.32969	0.666676	0.695448	0.667491	0.64608	0.682664	0.329685	0.690495	0.393895	0.704916	0.723175	0.355185	0.399982	0.457236	0.763881	0.546549	0.580382	0.267852	0.733274	0.54782	0.574135	0.533236	0.381343	0.490786
GSM2235910	0.456391	0.789883	0.791137	0.75758	0.710948	0.661609	0.377137	0.772409	0.554262	0.78413	0.899518	0.583068	0.503225	0.601662	0.768911	0.638928	0.684162	0.232865	0.788187	0.747553	0.651252	0.618707	0.427785	0.644375
GSM2235921	0.338476	0.647533	0.565578	0.63457	0.678661	0.657395	0.42927	0.662586	0.335077	0.737066	0.550846	0.449924	0.502825	0.460311	0.711806	0.518445	0.542587	0.197072	0.746206	0.506396	0.54237	0.517872	0.367318	0.539423
GSM2235922	0.253763	0.689948	0.77532	0.715376	0.695661	0.681735	0.321502	0.684648	0.406778	0.7776	0.766675	0.386759	0.506634	0.480222	0.762606	0.557631	0.640533	0.255454	0.764544	0.582927	0.620027	0.555634	0.350002	0.527627
GSM2235923	0.184195	0.539635	0.60231	0.678297	0.690067	0.673089	0.320623	0.666344	0.269685	0.722276	0.662884	0.397478	0.439432	0.471059	0.728427	0.501404	0.572115	0.190419	0.734415	0.431348	0.531981	0.563438	0.430835	0.549222
GSM2235924	0.218483	0.637402	0.587875	0.688673	0.720613	0.695796	0.216594	0.687247	0.323244	0.728336	0.641805	0.441417	0.396628	0.474055	0.722729	0.521391	0.625596	0.165853	0.706731	0.488354	0.540201	0.579564	0.424521	0.565282
GSM2235925	0.513869	0.678101	0.684502	0.691402	0.678149	0.669994	0.434902	0.645074	0.440302	0.712644	0.701095	0.428908	0.526886	0.466629	0.776659	0.505967	0.578835	0.219849	0.746988	0.520006	0.585398	0.582374	0.402658	0.538936
GSM2235926	0.475997	0.792926	0.858263	0.72955	0.738978	0.665608	0.414572	0.746919	0.552117	0.783706	0.893223	0.528253	0.418148	0.555266	0.748956	0.55985	0.676771	0.172271	0.78251	0.653101	0.658604	0.629369	0.420341	0.641299
GSM2235927	0.0961342	0.602541	0.512438	0.66578	0.699536	0.661138	0.249777	0.704773	0.286477	0.72096	0.526174	0.501942	0.478242	0.388315	0.704299	0.532135	0.558202	0.182777	0.68447	0.428198	0.496606	0.529329	0.417397	0.571962
GSM2235928	0.196404	0.665796	0.560494	0.669441	0.693082	0.665367	0.212409	0.72202	0.311589	0.769605	0.603367	0.46731	0.368769	0.498914	0.715743	0.555881	0.628555	0.270794	0.731613	0.504597	0.571779	0.549909	0.413717	0.626963
GSM2235929	0.478168	0.563166	0.720374	0.715021	0.69616	0.629203	0.350908	0.751428	0.448821	0.803449	0.859444	0.372559	0.48401	0.672018	0.723778	0.609392	0.617842	0.105751	0.819845	0.616271	0.621784	0.644358	0.359623	0.576746
GSM2235930	0.214315	0.602364	0.582368	0.716605	0.666809	0.671915	0.348112	0.682448	0.331095	0.749103	0.694255	0.539	0.546142	0.546794	0.717246	0.545993	0.612531	0.142247	0.744272	0.560829	0.600307	0.560754	0.42512	0.570284
GSM2235931	0.44368	0.723475	0.774353	0.752176	0.709008	0.653898	0.392659	0.679627	0.490554	0.786045	0.761547	0.364171	0.51176	0.462791	0.758535	0.516143	0.601012	0.234516	0.728269	0.53772	0.559914	0.569019	0.401376	0.59662
GSM2235932	0.24162	0.715123	0.690887	0.773075	0.678494	0.721489	0.335073	0.630724	0.329084	0.735705	0.668262	0.446984	0.59084	0.411003	0.793811	0.538945	0.603592	0.233522	0.721082	0.476015	0.500984	0.573623	0.454313	0.581464
GSM2235933	0.619331	0.604151	0.73438	0.717572	0.704405	0.681916	0.449457	0.735354	0.564666	0.773749	0.888309	0.475253	0.478825	0.762736	0.741093	0.637525	0.694113	0.218251	0.796555	0.701715	0.644913	0.674613	0.391488	0.584768
GSM2235934	0.623522	0.823268	0.924762	0.769591	0.764944	0.647457	0.424408	0.811382	0.629344	0.792365	0.948279	0.486417	0.39704	0.593132	0.749508	0.607222	0.687506	0.301128	0.776095	0.723264	0.691578	0.684207	0.466654	0.641224
GSM2235935	0.412234	0.621431	0.747895	0.693405	0.728229	0.64391	0.418562	0.71519	0.440038	0.745803	0.761413	0.357686	0.273951	0.527295	0.728535	0.553667	0.599395	0.233996	0.708888	0.540338	0.597015	0.613593	0.439749	0.523671
GSM2235936	0.31168	0.602173	0.625016	0.681457	0.677269	0.642432	0.360179	0.701098	0.360368	0.734716	0.735784	0.359966	0.298028	0.54814	0.708817	0.48923	0.569764	0.27323	0.714067	0.529775	0.530898	0.562534	0.420506	0.550546
GSM2235937	0.232963	0.657472	0.59918	0.699237	0.671513	0.656614	0.433355	0.71009	0.359482	0.771294	0.716944	0.498378	0.283294	0.526558	0.735935	0.51655	0.562722	0.362815	0.744825	0.602628	0.552397	0.562653	0.461505	0.556329
GSM2235938	0.232562	0.749686	0.636983	0.666043	0.717702	0.648105	0.370028	0.702884	0.315317	0.728506	0.708697	0.48643	0.356671	0.520221	0.701147	0.506209	0.553751	0.282896	0.682184	0.560752	0.536645	0.50239	0.374643	0.638906
GSM2235939	0.385647	0.565306	0.721778	0.662137	0.722632	0.675331	0.38123	0.689523	0.383405	0.733255	0.689312	0.35837	0.323438	0.549154	0.730107	0.492762	0.604726	0.152966	0.752358	0.523955	0.61371	0.583908	0.424952	0.507972
GSM2235940	0.438901	0.697688	0.853029	0.685947	0.700763	0.649643	0.354592	0.75292	0.467244	0.742445	0.827286	0.521018	0.277349	0.600159	0.739287	0.566651	0.589508	0.223791	0.750388	0.592465	0.596683	0.631619	0.451322	0.590194
GSM2235941	0.387965	0.800411	0.843187	0.752116	0.713701	0.6691	0.365652	0.795665	0.539503	0.773033	0.878488	0.518523	0.23604	0.560041	0.736591	0.619934	0.666298	0.423625	0.75088	0.673365	0.641631	0.652722	0.457938	0.652013
GSM2235942	0.272938	0.652223	0.679408	0.676519	0.714173	0.654189	0.300496	0.707562	0.369694	0.727995	0.675432	0.443857	0.268927	0.485976	0.73172	0.488749	0.570239	0.2886	0.692732	0.547977	0.526958	0.538692	0.439233	0.568698
GSM2235943	0.422027	0.776242	0.876399	0.709171	0.69137	0.672902	0.380558	0.762436	0.505561	0.742551	0.869411	0.452097	0.380266	0.628851	0.72737	0.640683	0.643407	0.172082	0.729304	0.660853	0.682669	0.591252	0.413578	0.604495
GSM2235944	0.788117	0.608999	0.744738	0.709917	0.679709	0.64461	0.37215	0.689819	0.633868	0.71058	0.802932	0.383029	0.458227	0.589741	0.819296	0.55731	0.5963	0.0914063	0.776397	0.597251	0.644119	0.654326	0.377518	0.56715
GSM2235945	0.284654	0.614371	0.590992	0.708076	0.706929	0.694664	0.239662	0.711608	0.415801	0.764636	0.798937	0.501007	0.41321	0.493562	0.766145	0.573995	0.617567	0.353247	0.781822	0.64023	0.590455	0.574975	0.3905	0.547962
GSM2235946	0.216076	0.667212	0.625449	0.727286	0.652527	0.69636	0.308786	0.656008	0.364964	0.768022	0.73301	0.560426	0.528001	0.391339	0.750031	0.555314	0.539503	0.295083	0.7514	0.482819	0.549095	0.53198	0.394736	0.626503
GSM2235947	0.454306	0.789305	0.831547	0.76181	0.637592	0.644714	0.371218	0.733131	0.507717	0.765497	0.833873	0.434293	0.467299	0.476815	0.770212	0.556569	0.639734	0.27777	0.744868	0.578348	0.602515	0.58872	0.422553	0.586027
GSM2235948	0.760511	0.608679	0.739873	0.677302	0.709132	0.612106	0.518623	0.733722	0.601347	0.730042	0.826909	0.372469	0.39824	0.751751	0.764524	0.568126	0.625328	0.170054	0.808713	0.608706	0.608121	0.663221	0.332667	0.591943
GSM2235949	0.657392	0.785599	0.824397	0.737545	0.703513	0.674733	0.424021	0.737027	0.599791	0.770907	0.842796	0.501318	0.438068	0.56717	0.774383	0.54035	0.629691	0.3215	0.761224	0.632568	0.634534	0.624922	0.448087	0.62128
GSM2235950	0.374147	0.469138	0.674381	0.634003	0.662972	0.548941	0.368276	0.708044	0.387826	0.736353	0.672365	0.296841	0.420233	0.71458	0.694194	0.532216	0.621835	0.0690179	0.770003	0.561807	0.560256	0.585861	0.320675	0.534596
GSM2235951	0.282285	0.554195	0.671233	0.668462	0.66216	0.60752	0.324786	0.686475	0.390156	0.766654	0.747603	0.358401	0.426226	0.623114	0.703598	0.543053	0.621662	0.0412399	0.775566	0.554003	0.62709	0.607286	0.384944	0.568814
GSM2235952	0.273332	0.667324	0.746515	0.778007	0.689054	0.688835	0.263874	0.679712	0.373972	0.751847	0.700054	0.469192	0.478298	0.510061	0.725335	0.573835	0.595717	0.128099	0.727898	0.580826	0.541106	0.594021	0.447596	0.634257
GSM2235953	0.150071	0.525203	0.497412	0.661516	0.726608	0.621618	0.316502	0.662866	0.239531	0.735535	0.564941	0.336137	0.329331	0.539951	0.691722	0.480223	0.607411	0.0803459	0.703767	0.433543	0.51124	0.537322	0.426134	0.560516
GSM2235954	0.413359	0.759096	0.810143	0.741275	0.694986	0.632206	0.367453	0.720418	0.488401	0.756628	0.81248	0.50523	0.401469	0.531368	0.757929	0.558927	0.638841	0.178943	0.736496	0.621042	0.631696	0.588065	0.45925	0.561928
GSM2235955	0.303978	0.696203	0.735047	0.69862	0.698702	0.651036	0.340667	0.670151	0.427998	0.764645	0.753272	0.391355	0.359529	0.52247	0.738566	0.552726	0.615986	0.140772	0.729532	0.595311	0.619629	0.607981	0.439884	0.568286
GSM2235956	0.131092	0.570172	0.57626	0.689061	0.687687	0.67399	0.195468	0.680017	0.259424	0.709807	0.611908	0.388791	0.315693	0.480255	0.731371	0.508558	0.598859	0.220005	0.697522	0.49398	0.507611	0.552976	0.505169	0.54213
GSM2235957	0.23261	0.667177	0.732546	0.688664	0.693249	0.640419	0.293058	0.758248	0.416113	0.740237	0.756536	0.636188	0.374895	0.464928	0.741755	0.582849	0.600437	0.18076	0.72852	0.647165	0.602243	0.60839	0.395768	0.514962
GSM2235958	0.253345	0.536263	0.61324	0.696615	0.700135	0.645665	0.373689	0.668776	0.348651	0.748221	0.766019	0.326993	0.42999	0.616066	0.729721	0.539632	0.611924	0.138374	0.785703	0.531352	0.616864	0.621585	0.392753	0.552997
GSM2235959	0.193135	0.731164	0.653613	0.742088	0.623357	0.626038	0.37547	0.676194	0.331318	0.714601	0.661849	0.53326	0.393358	0.412841	0.725621	0.551233	0.578114	0.152545	0.692524	0.49993	0.547428	0.543541	0.321495	0.608693
GSM2235960	0.147986	0.694823	0.632492	0.704192	0.697046	0.665587	0.2815	0.6941	0.339934	0.680291	0.725445	0.677711	0.319041	0.547607	0.731701	0.547624	0.605783	0.398902	0.721646	0.562825	0.538768	0.589914	0.446601	0.579102
GSM2235961	0.168293	0.557374	0.609225	0.67972	0.684178	0.63559	0.436835	0.706893	0.349966	0.804086	0.744326	0.321016	0.506857	0.592925	0.727358	0.590037	0.649365	0.167208	0.764889	0.637195	0.601143	0.587126	0.360558	0.561219
GSM2235962	0.303889	0.652816	0.681528	0.73228	0.693962	0.69757	0.271419	0.753454	0.469189	0.777365	0.74784	0.765446	0.333565	0.518619	0.730361	0.593727	0.641389	0.240852	0.764133	0.616158	0.592767	0.579443	0.459113	0.584753
GSM2235963	0.115175	0.671285	0.533828	0.69403	0.70611	0.674044	0.26297	0.636806	0.305698	0.671408	0.543475	0.33357	0.372067	0.411142	0.73764	0.512447	0.574468	0.152475	0.69976	0.479704	0.516352	0.525526	0.354232	0.519443
GSM2235964	0.52819	0.781134	0.838277	0.732067	0.709852	0.640487	0.370521	0.715013	0.514471	0.76765	0.822564	0.545739	0.399172	0.517099	0.754706	0.542536	0.630856	0.169795	0.755644	0.626369	0.630885	0.620637	0.423559	0.607335
GSM2235965	0.277692	0.653734	0.736307	0.739851	0.653581	0.615507	0.426731	0.670437	0.253251	0.730729	0.688869	0.262117	0.549714	0.445984	0.775078	0.552988	0.544044	0.154836	0.742207	0.468407	0.540744	0.53135	0.342595	0.591506
GSM2235966	0.544718	0.569914	0.721074	0.668172	0.725372	0.641964	0.403324	0.70096	0.433811	0.71867	0.686752	0.380533	0.425258	0.473054	0.751374	0.443736	0.609486	0.170837	0.755023	0.52161	0.58345	0.587538	0.429063	0.497225
GSM2235967	0.163149	0.547675	0.505668	0.611799	0.718678	0.619987	0.280114	0.67156	0.229551	0.64164	0.441012	0.766169	0.476876	0.319478	0.698431	0.436406	0.502001	0.112227	0.711554	0.388423	0.470698	0.439019	0.365457	0.594544
GSM2235968	0.177544	0.410655	0.547959	0.643149	0.623895	0.572364	0.278007	0.689336	0.34927	0.687037	0.560082	0.292052	0.435581	0.405515	0.643041	0.481006	0.542637	0.0893335	0.737243	0.550187	0.559277	0.529553	0.446269	0.564993
GSM2235969	0.251282	0.658173	0.739141	0.742454	0.625479	0.705606	0.320045	0.643543	0.292375	0.724573	0.696025	0.519586	0.525534	0.374357	0.772467	0.515485	0.607999	0.276334	0.743545	0.505191	0.530757	0.565445	0.451364	0.525499
GSM2235970	0.525256	0.646387	0.739753	0.724181	0.722804	0.643959	0.351688	0.703551	0.476557	0.768123	0.742025	0.395183	0.388757	0.516308	0.74668	0.547134	0.626335	0.133444	0.782592	0.613113	0.616069	0.625268	0.425229	0.568767
GSM2235971	0.595619	0.678015	0.802018	0.705676	0.63044	0.67049	0.469269	0.659827	0.440694	0.719783	0.721059	0.356059	0.477949	0.443814	0.741379	0.4967	0.605351	0.170568	0.771663	0.532043	0.610316	0.629939	0.415647	0.51645
GSM2235972	0.157366	0.644569	0.703565	0.6783	0.672523	0.690012	0.343735	0.665368	0.283831	0.715626	0.576558	0.765468	0.559338	0.355853	0.716251	0.458745	0.587032	0.245301	0.692827	0.435563	0.523723	0.478896	0.43923	0.569827
GSM2235973	0.131558	0.525749	0.571845	0.657955	0.69101	0.718828	0.283999	0.621899	0.287928	0.70358	0.583963	0.303407	0.576082	0.361195	0.744953	0.498103	0.569894	0.274737	0.73513	0.403533	0.523366	0.532404	0.459783	0.494131
GSM2235974	0.151545	0.655465	0.591394	0.651346	0.662365	0.670206	0.298304	0.661036	0.213516	0.740957	0.594796	0.444151	0.538979	0.374343	0.725111	0.48194	0.531194	0.259285	0.727244	0.440423	0.499084	0.495782	0.341192	0.547849
GSM2235975	0.32367	0.73273	0.851785	0.734429	0.665218	0.711077	0.369846	0.674535	0.375396	0.766643	0.767141	0.327648	0.62681	0.391102	0.751121	0.546151	0.599969	0.344716	0.757729	0.543964	0.562089	0.583655	0.369119	0.557668
GSM2235976	0.357758	0.787896	0.869812	0.755535	0.657165	0.675028	0.480538	0.642965	0.349316	0.750921	0.736323	0.264506	0.571616	0.486984	0.783846	0.605937	0.631049	0.344978	0.753149	0.563676	0.594169	0.572909	0.372846	0.590934
GSM2235977	0.112644	0.504389	0.504996	0.680738	0.665828	0.694717	0.210324	0.6635	0.236167	0.742828	0.521382	0.336877	0.423835	0.452171	0.741456	0.517354	0.585341	0.0924472	0.737954	0.423606	0.516448	0.543608	0.424513	0.536659
GSM2235978	0.483142	0.764671	0.890392	0.728598	0.720625	0.651785	0.347061	0.755712	0.536781	0.695451	0.871505	0.486871	0.418476	0.623884	0.764455	0.552908	0.651516	0.225137	0.752411	0.667012	0.665043	0.638154	0.471399	0.59817
GSM2235979	0.328371	0.610717	0.63951	0.666962	0.708488	0.668927	0.344933	0.729012	0.377704	0.751161	0.708332	0.423967	0.316915	0.556219	0.720845	0.528653	0.592788	0.293058	0.733921	0.582981	0.581993	0.584753	0.409593	0.543251
GSM2235980	0.340551	0.705293	0.857134	0.787365	0.796765	0.673154	0.475482	0.728385	0.448958	0.808371	0.814363	0.395959	0.4705	0.694969	0.745483	0.580409	0.619866	0.48403	0.782523	0.589776	0.601182	0.612114	0.460319	0.613055
GSM2235981	0.317303	0.730933	0.770684	0.678628	0.682387	0.678886	0.279231	0.743584	0.435463	0.765739	0.778571	0.432406	0.374152	0.51026	0.742139	0.550141	0.619945	0.210189	0.727903	0.627927	0.602012	0.589817	0.469996	0.54432
GSM2235982	0.289015	0.697899	0.724721	0.761349	0.719086	0.701977	0.358852	0.725431	0.449849	0.803232	0.820793	0.526904	0.397041	0.53011	0.754202	0.574512	0.644293	0.275125	0.77942	0.670437	0.635844	0.642377	0.49203	0.60763
GSM2235983	0.718211	0.804619	0.924555	0.726886	0.721692	0.672449	0.419358	0.77321	0.646872	0.763427	0.927467	0.540836	0.308858	0.638833	0.798142	0.569662	0.665975	0.300157	0.778364	0.706757	0.678398	0.67971	0.440276	0.618963
GSM2235984	0.325124	0.694527	0.720862	0.65732	0.743577	0.683638	0.338723	0.727151	0.373465	0.751755	0.691079	0.538951	0.354671	0.585148	0.696947	0.523304	0.565364	0.162355	0.704439	0.54443	0.554935	0.584552	0.433449	0.565662
GSM2235985	0.4566	0.690795	0.687794	0.79967	0.710784	0.707848	0.449186	0.709348	0.496341	0.791666	0.859089	0.391027	0.478709	0.576864	0.774268	0.552752	0.641193	0.449918	0.797721	0.67221	0.616995	0.59799	0.488548	0.520042
GSM2235986	0.350363	0.666838	0.68849	0.652997	0.701674	0.643447	0.384239	0.713171	0.398421	0.71599	0.694815	0.435756	0.257152	0.497347	0.743164	0.501104	0.562312	0.210241	0.695082	0.511483	0.547665	0.562819	0.437066	0.547894
GSM2235987	0.317524	0.676938	0.750792	0.73286	0.70598	0.708498	0.314471	0.779102	0.439649	0.774767	0.820861	0.587935	0.310149	0.611679	0.756204	0.595765	0.615318	0.260191	0.750919	0.658355	0.639992	0.622655	0.429605	0.598746
GSM2235988	0.39176	0.626814	0.643354	0.656679	0.694437	0.668868	0.41712	0.68688	0.35186	0.730293	0.60497	0.342547	0.433196	0.482568	0.732808	0.445187	0.547283	0.153857	0.721883	0.461162	0.544417	0.552064	0.407991	0.567673
GSM2235991	0.35813	0.564576	0.638651	0.720257	0.673822	0.652833	0.233697	0.743269	0.445738	0.76326	0.843754	0.620243	0.386112	0.526245	0.729716	0.538282	0.617492	0.221854	0.697308	0.544461	0.611389	0.569919	0.500078	0.495981
GSM2235992	0.396434	0.591387	0.661117	0.698066	0.684124	0.657039	0.351844	0.68495	0.395325	0.736102	0.728713	0.371578	0.495876	0.497717	0.717601	0.536309	0.564731	0.214151	0.754637	0.490114	0.558478	0.575526	0.415957	0.583011
GSM2235993	0.657257	0.7833	0.90721	0.72893	0.726045	0.687621	0.389948	0.739182	0.589732	0.780856	0.883588	0.511575	0.510871	0.554208	0.7707	0.551389	0.654092	0.189181	0.767521	0.648722	0.646836	0.64943	0.433958	0.617173
GSM2235994	0.199284	0.348126	0.480181	0.639956	0.591262	0.570933	0.201461	0.704562	0.324544	0.714628	0.535835	0.360881	0.505127	0.551591	0.654587	0.451448	0.614458	0.164584	0.739716	0.446935	0.471594	0.489524	0.351288	0.574933
GSM2235995	0.192944	0.663469	0.649507	0.70677	0.707243	0.654283	0.276072	0.688052	0.326273	0.757235	0.637751	0.367425	0.37718	0.459829	0.751151	0.51278	0.581818	0.228525	0.654751	0.517607	0.52284	0.566128	0.418118	0.587787
GSM2235996	0.338223	0.615569	0.686131	0.778596	0.680779	0.675485	0.389984	0.749695	0.562384	0.837004	0.847393	0.960327	0.489734	0.620884	0.765065	0.571743	0.630952	0.598415	0.808329	0.599268	0.613124	0.582786	0.5656	0.586548
GSM2235997	0.185194	0.66809	0.654662	0.725356	0.731927	0.679989	0.302183	0.628134	0.293563	0.739093	0.664694	0.48985	0.550275	0.543664	0.735508	0.572655	0.631692	0.207704	0.756332	0.549212	0.566047	0.574774	0.411777	0.559586
GSM2235998	0.175614	0.616708	0.625829	0.699665	0.70397	0.621093	0.361601	0.673166	0.287054	0.712301	0.59924	0.420516	0.507178	0.428304	0.7712	0.497488	0.618083	0.033294	0.734786	0.484567	0.513705	0.536086	0.408213	0.57043
GSM2235999	0.29711	0.691148	0.598184	0.7211	0.676407	0.646789	0.271798	0.71768	0.360402	0.704064	0.640842	0.507982	0.419055	0.426013	0.748971	0.554865	0.617623	0.166597	0.707541	0.56766	0.567833	0.556624	0.418201	0.557144
GSM2236000	0.278815	0.595073	0.54674	0.718033	0.631447	0.650723	0.205161	0.703396	0.308212	0.755961	0.693567	0.301276	0.54796	0.425602	0.828786	0.531082	0.602438	0.160645	0.753943	0.562303	0.5552	0.522758	0.386944	0.506683
GSM2236001	0.334629	0.622365	0.708238	0.715496	0.720107	0.660977	0.410416	0.690539	0.414317	0.76557	0.731236	0.399642	0.512586	0.576361	0.725855	0.539231	0.603811	0.0678241	0.795174	0.555961	0.612243	0.624335	0.43047	0.568646
GSM2236002	0.0696477	0.655446	0.529247	0.680384	0.662298	0.63817	0.406853	0.672218	0.241499	0.674978	0.535566	0.495424	0.488044	0.443631	0.723789	0.487654	0.564311	0.0656448	0.680096	0.460708	0.494918	0.513786	0.401009	0.532155
GSM2236003	0.183863	0.522559	0.551996	0.655118	0.656808	0.63421	0.30815	0.648097	0.276422	0.73106	0.575787	0.388331	0.474665	0.470665	0.703513	0.487832	0.618952	0.0234566	0.739661	0.496314	0.527323	0.552968	0.428207	0.519075
GSM2236004	0.184946	0.623312	0.632636	0.683065	0.735094	0.63461	0.367876	0.710794	0.356923	0.70375	0.676791	0.475123	0.464557	0.458864	0.723957	0.497053	0.587705	0.355477	0.718171	0.508745	0.565169	0.550366	0.419447	0.553742
GSM2236005	0.157531	0.623949	0.57107	0.71796	0.679049	0.687546	0.265009	0.664511	0.27456	0.730259	0.554221	0.411913	0.46278	0.408495	0.735091	0.530004	0.61581	0.184754	0.742864	0.445014	0.506741	0.541823	0.460946	0.562972
GSM2236006	0.180691	0.663221	0.587326	0.672298	0.658399	0.678636	0.265379	0.677038	0.341187	0.72455	0.662833	0.442246	0.529129	0.419034	0.711557	0.512746	0.577472	0.250431	0.709104	0.490056	0.556268	0.507942	0.447861	0.592735
GSM2236007	0.308828	0.709289	0.744021	0.756492	0.704869	0.682163	0.27702	0.806951	0.48378	0.776317	0.877394	0.701384	0.372692	0.575415	0.761476	0.609142	0.672011	0.227491	0.756799	0.723165	0.633973	0.63072	0.461919	0.608386
GSM2236008	0.497081	0.596159	0.791289	0.724869	0.700148	0.616371	0.346566	0.772275	0.539953	0.79246	0.859918	0.465297	0.402482	0.72186	0.781487	0.551234	0.643147	0.171755	0.786855	0.579798	0.633896	0.635187	0.496775	0.571136
GSM2236009	0.320639	0.688929	0.654441	0.721498	0.655502	0.656264	0.263819	0.680399	0.366425	0.736004	0.691434	0.367239	0.528873	0.443194	0.699276	0.523134	0.591661	0.081713	0.735082	0.525464	0.546228	0.576223	0.388041	0.522246
GSM2236010	0.445608	0.718847	0.718835	0.705195	0.726648	0.66366	0.399073	0.699451	0.455527	0.722645	0.646443	0.404831	0.421225	0.568686	0.723733	0.464077	0.574999	0.19443	0.707391	0.492787	0.562626	0.571554	0.508041	0.539766
GSM2236011	0.313832	0.680286	0.703736	0.708134	0.64465	0.63559	0.402327	0.697461	0.376108	0.707432	0.724486	0.435831	0.485077	0.587798	0.733862	0.530269	0.602425	0.207433	0.765979	0.524463	0.548297	0.554537	0.416156	0.59333
GSM2236012	0.225964	0.70455	0.63467	0.70299	0.702198	0.639237	0.3459	0.726429	0.402999	0.82168	0.643271	0.531146	0.425503	0.511265	0.714895	0.548793	0.632829	0.190738	0.734362	0.559894	0.574099	0.596717	0.450693	0.642723
GSM2236013	0.265756	0.74583	0.6746	0.70978	0.66544	0.684332	0.321481	0.736045	0.41373	0.787208	0.718257	0.514423	0.250157	0.539887	0.751614	0.567297	0.644891	0.335675	0.728747	0.639598	0.604841	0.605887	0.447114	0.644323
GSM2236014	0.141981	0.755779	0.762533	0.734024	0.636441	0.6521	0.329172	0.704619	0.332812	0.758825	0.667183	0.371721	0.383452	0.378657	0.747063	0.534511	0.624112	0.276223	0.683503	0.497187	0.484174	0.543834	0.473072	0.561423
GSM2236015	0.607845	0.659201	0.71846	0.651822	0.683431	0.643305	0.408467	0.678675	0.519031	0.752457	0.717002	0.392702	0.431468	0.499107	0.713541	0.503027	0.662153	0.0865156	0.729854	0.550326	0.552921	0.604785	0.395638	0.581987
GSM2236016	0.185498	0.736579	0.621222	0.664638	0.669456	0.681476	0.315733	0.703372	0.306449	0.752645	0.607276	0.414286	0.295498	0.572089	0.686258	0.514309	0.62535	0.290315	0.705204	0.515237	0.513874	0.553613	0.431515	0.712645
GSM2236017	0.220304	0.590246	0.628281	0.678999	0.673182	0.668726	0.233886	0.708491	0.339052	0.764122	0.580254	0.247256	0.389928	0.482077	0.704411	0.479154	0.607935	0.249109	0.715848	0.511699	0.527916	0.563847	0.405473	0.598353
GSM2236018	0.332186	0.665558	0.702346	0.649476	0.733628	0.646478	0.456939	0.712849	0.404632	0.765803	0.653536	0.316194	0.421747	0.476214	0.72772	0.509648	0.614734	0.293198	0.723137	0.518644	0.548634	0.595233	0.46803	0.61743
GSM2236019	0.18686	0.699563	0.617648	0.64457	0.694611	0.60434	0.390967	0.700931	0.309362	0.687092	0.58329	0.51066	0.438154	0.448992	0.716444	0.505931	0.587189	0.189312	0.746902	0.555023	0.540854	0.537581	0.440814	0.528985
GSM2236020	0.28398	0.763936	0.702945	0.726622	0.67144	0.653971	0.270049	0.705163	0.423803	0.670471	0.633312	0.425216	0.316346	0.425775	0.713114	0.522805	0.639306	0.358732	0.685054	0.534727	0.509974	0.558655	0.445418	0.592194
GSM2236021	0.366789	0.602594	0.685094	0.664775	0.67003	0.64939	0.346752	0.692545	0.417496	0.749077	0.675485	0.299267	0.332845	0.530519	0.704266	0.551245	0.646554	0.0206077	0.78051	0.561433	0.591817	0.633582	0.42231	0.573104
GSM2236022	0.166348	0.673478	0.614499	0.694209	0.67448	0.662074	0.336574	0.706221	0.303645	0.710352	0.60531	0.44929	0.265034	0.503246	0.739261	0.518738	0.621694	0.30135	0.725526	0.538209	0.538989	0.557485	0.461731	0.610933
GSM2236023	0.53995	0.829614	0.810723	0.743987	0.701648	0.631178	0.382852	0.714298	0.581309	0.74375	0.800958	0.418324	0.327381	0.486454	0.739159	0.552547	0.590805	0.167096	0.728684	0.650466	0.560467	0.631121	0.472452	0.64071
GSM2236024	0.795845	0.783355	0.820309	0.732094	0.692123	0.662247	0.408532	0.631697	0.675163	0.762079	0.754762	0.414029	0.513015	0.480563	0.771215	0.518344	0.62469	0.252989	0.736189	0.560993	0.584915	0.621742	0.445751	0.566701
GSM2236025	0.904294	0.688103	0.804354	0.725688	0.726451	0.634213	0.47106	0.698721	0.761147	0.770256	0.851658	0.344095	0.508838	0.644173	0.808387	0.542694	0.64714	0.111478	0.81868	0.627093	0.654334	0.679686	0.409096	0.595178
GSM2236026	0.333742	0.526239	0.641562	0.692664	0.672179	0.61146	0.379179	0.776039	0.506509	0.771941	0.747307	0.583995	0.455943	0.675857	0.695063	0.556662	0.634904	0.238437	0.76306	0.567583	0.610474	0.545948	0.482547	0.561339
GSM2236027	0.219496	0.568479	0.62323	0.764021	0.678969	0.650881	0.391472	0.774576	0.421413	0.799912	0.760151	0.555718	0.483179	0.722492	0.707772	0.537981	0.626628	0.328315	0.756287	0.595668	0.599715	0.566168	0.44506	0.596872
GSM2236028	0.252794	0.698662	0.709224	0.743942	0.739207	0.621804	0.333518	0.776715	0.426945	0.769607	0.826292	0.429929	0.357233	0.576368	0.734948	0.58816	0.617177	0.300493	0.700282	0.597546	0.584064	0.626495	0.47114	0.629725
GSM2236029	0.713812	0.808921	0.836936	0.711619	0.681692	0.677937	0.390405	0.680952	0.615375	0.720199	0.794996	0.388826	0.467419	0.407408	0.722511	0.504444	0.567264	0.181099	0.723197	0.579166	0.605776	0.595416	0.389313	0.638545
GSM2236030	0.192129	0.706697	0.640565	0.71197	0.689855	0.676834	0.378895	0.6965	0.376785	0.751132	0.737155	0.405195	0.343402	0.525514	0.732756	0.57792	0.607645	0.121782	0.698505	0.612557	0.584484	0.57455	0.418301	0.557987
GSM2236031	0.559139	0.630971	0.684268	0.695547	0.72517	0.616328	0.468894	0.730066	0.498005	0.768338	0.81664	0.329697	0.500102	0.645668	0.729212	0.589173	0.588789	0.192615	0.796483	0.584265	0.630363	0.654497	0.410741	0.574733
GSM2236032	0.265194	0.747898	0.734379	0.698877	0.683929	0.670189	0.311613	0.687688	0.390991	0.708092	0.686088	0.498299	0.302585	0.475647	0.740099	0.542033	0.614664	0.143866	0.679508	0.540224	0.542171	0.599769	0.44114	0.617796
GSM2236033	0.197349	0.57468	0.535144	0.689185	0.679629	0.607773	0.193524	0.681621	0.2997	0.760597	0.655838	0.313965	0.385977	0.412065	0.709566	0.526676	0.56585	0.22189	0.700468	0.559321	0.547649	0.505317	0.28394	0.53195
GSM2236034	0.676119	0.782472	0.874551	0.739632	0.732943	0.653152	0.372888	0.69393	0.57739	0.720468	0.824645	0.39971	0.431273	0.463619	0.780259	0.546678	0.643907	0.244921	0.763198	0.615178	0.629513	0.645124	0.474495	0.650467
GSM2236036	0.234881	0.670719	0.603399	0.629211	0.714317	0.661122	0.34878	0.671951	0.324303	0.716299	0.599363	0.349705	0.30372	0.500349	0.700777	0.471368	0.564459	0.170765	0.669095	0.482468	0.532419	0.515888	0.406713	0.621819
GSM2236037	0.207951	0.576762	0.637846	0.705127	0.707552	0.669752	0.330516	0.757161	0.409841	0.788101	0.783206	0.433839	0.384266	0.593101	0.742925	0.585828	0.641718	0.182243	0.757248	0.617594	0.636273	0.617786	0.434225	0.566828
GSM2236038	0.48395	0.663159	0.787098	0.693079	0.718568	0.677729	0.373537	0.673093	0.4566	0.775609	0.770435	0.395402	0.348266	0.497275	0.749743	0.542476	0.613904	0.186263	0.767134	0.517684	0.593934	0.616952	0.427988	0.525432
GSM2236039	0.165712	0.636381	0.607538	0.611594	0.70968	0.6621	0.309819	0.691804	0.260636	0.716546	0.625779	0.508426	0.340994	0.429682	0.688772	0.468588	0.564462	0.268791	0.720587	0.472114	0.514315	0.516225	0.391503	0.591808
GSM2236040	0.219964	0.713995	0.674105	0.69826	0.680179	0.632918	0.436806	0.702679	0.391787	0.691126	0.726126	0.514177	0.291	0.595578	0.733623	0.487878	0.556031	0.459144	0.685355	0.527774	0.502204	0.571959	0.488934	0.673844
GSM2236041	0.578949	0.714235	0.798147	0.696983	0.75552	0.66351	0.474828	0.75946	0.546214	0.801357	0.874614	0.485511	0.395505	0.712969	0.761078	0.560114	0.64192	0.323258	0.774082	0.647337	0.660137	0.664708	0.464166	0.637237
GSM2236042	0.37355	0.639921	0.705057	0.667815	0.70749	0.657202	0.438065	0.662197	0.392855	0.69161	0.586606	0.431756	0.452408	0.478114	0.729975	0.509593	0.583719	0.1406	0.734149	0.515134	0.556421	0.551449	0.438134	0.477852
GSM2236043	0.503176	0.71695	0.720825	0.690692	0.721623	0.663272	0.399086	0.740863	0.475216	0.772808	0.794128	0.482654	0.346722	0.529918	0.770969	0.524614	0.620805	0.288579	0.771116	0.635515	0.618279	0.593895	0.478454	0.626645
GSM2236044	0.171262	0.636712	0.539044	0.678168	0.652253	0.647253	0.333737	0.659589	0.228606	0.741617	0.567327	0.555409	0.47883	0.379101	0.700795	0.532675	0.573346	0.104286	0.744853	0.452245	0.506993	0.511077	0.410967	0.522007
GSM2236045	0.282053	0.699924	0.755388	0.732655	0.681387	0.623934	0.211551	0.738457	0.471851	0.749631	0.689375	0.486997	0.361018	0.565129	0.725268	0.51986	0.585419	0.40243	0.707922	0.523256	0.571895	0.570733	0.546291	0.573119
GSM2236046	0.299884	0.637611	0.62383	0.701949	0.696634	0.674409	0.361752	0.674139	0.370971	0.724006	0.61753	0.413318	0.432901	0.467993	0.744674	0.514864	0.604074	0.201971	0.705364	0.489169	0.551023	0.560145	0.439753	0.546117
GSM2236047	0.874959	0.788344	0.701979	0.76687	0.723989	0.663829	0.447949	0.759628	0.686291	0.765166	0.798493	0.343234	0.541837	0.559726	0.804651	0.582202	0.632438	0.0253202	0.804252	0.675814	0.665289	0.631103	0.41275	0.562028
GSM2236048	0.28857	0.842583	0.681358	0.682771	0.660717	0.647097	0.251363	0.717954	0.446556	0.670695	0.639655	0.43308	0.405836	0.46458	0.692461	0.526583	0.605272	0.215927	0.702108	0.552386	0.556813	0.548795	0.411805	0.615021
GSM2236049	1	0.875955	0.81229	0.707869	0.714355	0.668273	0.481373	0.731268	0.85356	0.713604	0.811723	0.27886	0.550688	0.458147	0.810367	0.555163	0.643872	0.0549386	0.799846	0.654068	0.640069	0.649201	0.365531	0.612282
GSM2236050	0.221829	0.688878	0.574184	0.671642	0.675545	0.657543	0.359734	0.700428	0.37549	0.717761	0.578848	0.384843	0.516476	0.397498	0.749592	0.504778	0.604757	0.117826	0.753283	0.551344	0.566291	0.524298	0.411948	0.596852
GSM2236051	0.452033	0.655647	0.67988	0.68544	0.633484	0.652231	0.436955	0.674019	0.502426	0.72162	0.644747	0.244291	0.655057	0.531769	0.704421	0.550506	0.632432	0.106698	0.804196	0.542441	0.54983	0.61176	0.407839	0.572106
GSM2236052	0.146201	0.734426	0.594793	0.665817	0.668421	0.640668	0.28844	0.702998	0.275329	0.726242	0.608539	0.264943	0.428728	0.463112	0.69961	0.508582	0.601838	0.296877	0.689853	0.503354	0.525354	0.520364	0.425818	0.610579
GSM2236053	0.215542	0.616178	0.550378	0.687518	0.657814	0.62832	0.388139	0.71713	0.378949	0.757449	0.658223	0.199104	0.501462	0.523396	0.71181	0.54894	0.667287	0.120596	0.789889	0.587321	0.583026	0.569793	0.353183	0.593589
GSM2236054	0.268143	0.607241	0.621536	0.696525	0.719906	0.647208	0.349055	0.711852	0.411212	0.803427	0.750458	0.337111	0.468723	0.582686	0.726484	0.557286	0.662454	0.16406	0.764438	0.654727	0.624941	0.63487	0.394009	0.586764
GSM2236055	0.133549	0.589267	0.566694	0.631301	0.655554	0.587918	0.308477	0.695705	0.286505	0.728394	0.540621	0.401219	0.279772	0.359848	0.691175	0.50441	0.607744	0.150532	0.696856	0.537748	0.566421	0.528979	0.448492	0.586805
GSM2236056	0.220808	0.581073	0.617736	0.637949	0.704279	0.669277	0.377607	0.673058	0.329073	0.6582	0.522592	0.389245	0.351445	0.455544	0.744206	0.465104	0.562586	0.36622	0.721657	0.483989	0.516259	0.562224	0.37775	0.510795
GSM2236057	0.585213	0.699161	0.714474	0.693548	0.730309	0.647877	0.339834	0.724808	0.540209	0.746464	0.767706	0.281393	0.373474	0.639858	0.722334	0.524341	0.597656	0.0689254	0.775111	0.604763	0.632543	0.638808	0.423682	0.60491
GSM2236058	0.358987	0.689984	0.651974	0.650402	0.696678	0.678967	0.353927	0.701525	0.412349	0.75571	0.63219	0.359465	0.342535	0.549799	0.684415	0.492816	0.589695	0.265057	0.730219	0.520259	0.57633	0.576961	0.443178	0.608755
GSM2236059	0.211455	0.62479	0.589118	0.721165	0.729113	0.665967	0.400436	0.74038	0.358679	0.787851	0.730172	0.543827	0.384316	0.576486	0.736591	0.591932	0.623459	0.151552	0.756786	0.643253	0.577767	0.593894	0.487346	0.549493
GSM2236060	0.424908	0.746572	0.750547	0.747415	0.71967	0.665056	0.543738	0.817956	0.488018	0.817308	0.87925	0.431767	0.376396	0.740864	0.750275	0.639761	0.658658	0.459646	0.838066	0.757189	0.678016	0.673063	0.422752	0.601129
GSM2236061	0.493157	0.695203	0.798511	0.679708	0.743161	0.64843	0.51589	0.829711	0.522327	0.808648	0.910787	0.388712	0.287135	0.715641	0.78699	0.599704	0.646114	0.254014	0.76936	0.758036	0.693527	0.658463	0.46463	0.611834
GSM2236062	0.220326	0.754988	0.678263	0.695958	0.682579	0.675441	0.367959	0.764332	0.417891	0.767438	0.738404	0.45643	0.370431	0.587343	0.729296	0.556492	0.627762	0.387146	0.730886	0.633361	0.578776	0.605345	0.447227	0.599762
GSM2236063	0.173389	0.650554	0.595499	0.646437	0.690217	0.643209	0.391928	0.743763	0.35875	0.735513	0.669388	0.753942	0.34363	0.573547	0.725686	0.566797	0.60096	0.25554	0.768241	0.608382	0.575339	0.566022	0.464362	0.514894
GSM2236064	0.154106	0.697456	0.671747	0.659502	0.703343	0.693637	0.274482	0.727579	0.333695	0.699176	0.639151	0.596407	0.452874	0.54886	0.737546	0.540983	0.568143	0.325673	0.712125	0.538158	0.535716	0.569045	0.438511	0.600382
GSM2236065	0.212846	0.70238	0.624443	0.663873	0.632645	0.577613	0.361599	0.693292	0.313381	0.722555	0.595239	0.229916	0.406922	0.334735	0.697654	0.533489	0.628171	0.0771277	0.711102	0.49081	0.55288	0.53949	0.4078	0.611616
GSM2236066	0.51972	0.679286	0.624231	0.676107	0.627763	0.668048	0.480288	0.661241	0.460116	0.759795	0.576326	0.219331	0.373414	0.385351	0.731357	0.572564	0.640959	0.261375	0.744207	0.5735	0.553735	0.566276	0.482867	0.549288
GSM2236067	0.295443	0.716112	0.716095	0.74132	0.670111	0.62301	0.33424	0.749213	0.424708	0.739434	0.661687	0.398086	0.310329	0.42436	0.739879	0.547917	0.665868	0.353224	0.765038	0.638852	0.557158	0.588141	0.45415	0.65126
GSM2236068	0.525399	0.520335	0.686412	0.626644	0.653645	0.587347	0.385868	0.685831	0.471806	0.736009	0.683731	0.241383	0.243193	0.490434	0.714111	0.526883	0.625895	0.0614904	0.745567	0.518841	0.575209	0.60531	0.389021	0.550702
GSM2236069	0.262179	0.647324	0.556792	0.71757	0.658177	0.654867	0.377867	0.645141	0.317882	0.680695	0.522045	0.231781	0.405721	0.31831	0.749452	0.47605	0.567987	0.23654	0.644647	0.410162	0.516163	0.509883	0.502289	0.549086
GSM2236070	0.427756	0.781718	0.881441	0.753767	0.727193	0.603575	0.379432	0.701119	0.460916	0.772306	0.787816	0.611404	0.279563	0.437051	0.758566	0.579301	0.65566	0.355529	0.76806	0.628416	0.612185	0.608176	0.546618	0.653204
GSM2236071	0.401229	0.858459	0.816262	0.703144	0.690129	0.594574	0.397639	0.727596	0.512394	0.771695	0.77664	0.335187	0.268983	0.506242	0.703436	0.528944	0.631832	0.323099	0.712753	0.619696	0.601246	0.592958	0.478511	0.659111
GSM2236072	0.339975	0.756019	0.797232	0.759629	0.727153	0.584047	0.271729	0.716776	0.455061	0.757348	0.826917	0.458989	0.274216	0.467758	0.702665	0.588381	0.654191	0.187738	0.685137	0.657532	0.616743	0.591451	0.443157	0.60637
GSM2236073	0.223079	0.674063	0.6005	0.661184	0.661707	0.690631	0.250748	0.682049	0.316072	0.749663	0.67354	0.476539	0.464081	0.561224	0.784998	0.540073	0.619825	0.189903	0.714003	0.539923	0.551086	0.552758	0.370899	0.561614
GSM2236074	0.327109	0.75211	0.683861	0.667075	0.668743	0.622344	0.276516	0.662844	0.361786	0.72831	0.631935	0.690276	0.512764	0.433464	0.75058	0.539245	0.644056	0.19713	0.744253	0.533265	0.508839	0.51747	0.392741	0.658867
GSM2236075	0.302623	0.69888	0.670238	0.702095	0.684334	0.651373	0.407871	0.735652	0.396473	0.781436	0.774304	0.32885	0.499514	0.607577	0.716969	0.5738	0.652838	0.18492	0.779948	0.611612	0.613105	0.629839	0.377795	0.589044
GSM2236076	0.563926	0.832299	0.865283	0.780732	0.792271	0.646813	0.426967	0.696716	0.577631	0.758751	0.80676	0.650116	0.532243	0.539985	0.76142	0.527194	0.639732	0.183718	0.770332	0.605235	0.600455	0.625214	0.510761	0.661328
GSM2236077	0.313832	0.767917	0.790373	0.714664	0.718951	0.652057	0.341512	0.729293	0.455497	0.737981	0.70527	0.418861	0.440801	0.438729	0.723408	0.570463	0.617722	0.286647	0.716007	0.580091	0.569378	0.604522	0.420895	0.628314
GSM2236078	0.163768	0.643228	0.500401	0.625367	0.692047	0.621177	0.24762	0.665108	0.281132	0.704309	0.562566	0.339356	0.398862	0.42191	0.717878	0.505059	0.551314	0.112097	0.697349	0.478715	0.513487	0.514877	0.391594	0.635477
GSM2236079	0.371721	0.795557	0.815526	0.756087	0.727099	0.642259	0.395276	0.723986	0.485549	0.808111	0.821995	0.615918	0.570928	0.456882	0.736041	0.522806	0.647539	0.213747	0.748739	0.613683	0.622135	0.621056	0.444204	0.600106
GSM2236080	0.207716	0.784756	0.682789	0.767824	0.696865	0.670017	0.5109	0.747517	0.418179	0.797572	0.791071	0.71076	0.54141	0.679542	0.713111	0.600178	0.640404	0.379142	0.795575	0.695412	0.592996	0.638509	0.470929	0.636429
GSM2236082	0.62586	0.698273	0.70201	0.697578	0.695886	0.64436	0.44082	0.716295	0.544402	0.757865	0.732396	0.309653	0.494672	0.520688	0.751711	0.444515	0.603513	0.122595	0.727487	0.568608	0.59867	0.581269	0.420172	0.605861
GSM2236083	0.421304	0.567649	0.71298	0.657505	0.734969	0.606325	0.367661	0.688435	0.401893	0.713416	0.616587	0.227367	0.472599	0.547807	0.736487	0.431634	0.576366	0.101177	0.72742	0.452661	0.54616	0.557596	0.3936	0.519018
GSM2236084	0.250997	0.690975	0.628553	0.710353	0.670565	0.659448	0.400943	0.715136	0.35742	0.728442	0.678824	0.446909	0.440446	0.548245	0.723963	0.509301	0.589874	0.256661	0.742265	0.549344	0.557164	0.593035	0.39818	0.58539
GSM2236085	0.311802	0.757917	0.798323	0.67417	0.710298	0.651655	0.398014	0.740999	0.440203	0.761173	0.766232	0.374171	0.277592	0.535569	0.718506	0.531201	0.589015	0.361508	0.71568	0.603238	0.585576	0.614292	0.451497	0.64612
GSM2236086	0.494972	0.796159	0.846612	0.719952	0.687403	0.649102	0.405197	0.733469	0.56913	0.754404	0.879463	0.483241	0.396136	0.543025	0.747097	0.57243	0.620207	0.284487	0.757443	0.697453	0.653978	0.666413	0.433211	0.621566
GSM2236087	0.299224	0.736485	0.709968	0.698501	0.708872	0.676867	0.375854	0.731906	0.416585	0.779653	0.813489	0.477053	0.375996	0.485371	0.713189	0.54309	0.60488	0.284782	0.741873	0.591787	0.590828	0.624982	0.406576	0.594864
GSM2236088	0.176393	0.669406	0.645668	0.653218	0.705914	0.685553	0.378073	0.724074	0.386863	0.784154	0.741226	0.437969	0.43925	0.559822	0.69103	0.523341	0.570336	0.382365	0.733607	0.611403	0.561501	0.60492	0.403315	0.614806
GSM2236089	0.351895	0.761628	0.794971	0.672947	0.738716	0.678939	0.389647	0.754769	0.454859	0.778593	0.780209	0.419176	0.324566	0.563871	0.698841	0.517958	0.620929	0.241674	0.738848	0.583947	0.601881	0.618635	0.46625	0.626748
GSM2236090	0.607305	0.717183	0.734878	0.684021	0.699857	0.652426	0.484152	0.706908	0.574411	0.763158	0.750479	0.444677	0.390345	0.507264	0.723369	0.53398	0.568578	0.182479	0.744426	0.637234	0.596	0.641424	0.415813	0.593536
GSM2236091	0.254305	0.664318	0.659137	0.673449	0.716328	0.674096	0.388668	0.728391	0.376977	0.799725	0.739907	0.394918	0.364266	0.540633	0.70843	0.534914	0.583522	0.211165	0.7425	0.575178	0.591825	0.576521	0.391631	0.608869
GSM2236092	0.242946	0.682904	0.663479	0.686591	0.701271	0.653624	0.374933	0.726891	0.378736	0.796292	0.749366	0.360522	0.277935	0.532192	0.70949	0.518525	0.567449	0.280574	0.726478	0.570353	0.570602	0.578299	0.390489	0.588091
GSM2236093	0.269738	0.661157	0.704822	0.684558	0.708036	0.679535	0.407627	0.714948	0.393716	0.765336	0.710745	0.28639	0.277011	0.559965	0.708264	0.545032	0.578989	0.268376	0.748693	0.568839	0.553805	0.585595	0.410031	0.576399
GSM2236094	0.270619	0.688445	0.70174	0.673759	0.702497	0.66296	0.377721	0.726914	0.395836	0.760496	0.72311	0.448214	0.395203	0.557371	0.712356	0.528316	0.593929	0.314556	0.707351	0.560673	0.567642	0.577914	0.440234	0.605226
GSM2236095	0.252903	0.660927	0.672809	0.670587	0.696767	0.671695	0.415765	0.71374	0.378593	0.760315	0.71831	0.332308	0.337206	0.580161	0.716452	0.550167	0.582345	0.287898	0.714339	0.560937	0.568619	0.587026	0.394379	0.599759
