# Supplementary material for: Cross-talk of RNA modification "writers" describes tumor stemness and microenvironment and guides personalized immunotherapy for gastric cancer
Source: Aging (Albany NY). 2023 Jun 14;15(12):5445–81. doi: 10.18632/aging.204802 (PMC10333070; doi:10.18632/aging.204802)
Supplement: Supplementary Table 10 [file aging-15-204802-s011.xlsx]

## Sheet: Sheet1
Supplementary Table 10. Evaluating the relative activation of immune functions of patients in the meta-GEO cohort by ssGSEA.
Patient ID	APC_co_inhibition	APC_co_stimulation	CCR	Check-point	Cytolytic_activity	HLA	Inflammation-promoting	MHC_class_I	Parainflammation	T_cell_co-inhibition	T_cell_co-stimulation	Type_I_IFN_Reponse	Type_II_IFN_Reponse
GSM387789	0.615237	0.381545	0.422423	0.417491	0.712005	0.838934	0.60475	0.99163	0.698827	0.516116	0.33068	0.812212	0.509059
GSM387791	0.481529	0.472891	0.44883	0.434073	0.774083	0.866364	0.742035	0.997553	0.685072	0.542247	0.450204	0.828873	0.52514
GSM387792	0.472432	0.334063	0.379635	0.314131	0.47645	0.714284	0.520682	0.991046	0.674658	0.383267	0.212785	0.733881	0.559572
GSM387794	0.465206	0.280991	0.368806	0.283996	0.618525	0.728621	0.499187	0.979652	0.656521	0.384157	0.132464	0.741684	0.548381
GSM387795	0.450402	0.226356	0.330146	0.286779	0.418838	0.741875	0.447524	0.967446	0.553268	0.431568	0.181351	0.63571	0.567348
GSM387796	0.631849	0.383872	0.370151	0.383847	0.620598	0.84899	0.646442	0.998589	0.708528	0.42154	0.251884	0.732805	0.474629
GSM387800	0.63548	0.339231	0.385313	0.334706	0.433434	0.791146	0.488931	0.99609	0.697268	0.434325	0.175926	0.873763	0.579544
GSM387801	0.553009	0.330674	0.372112	0.331605	0.50124	0.675581	0.483105	0.98595	0.645513	0.393528	0.240906	0.663984	0.529221
GSM387802	0.613781	0.458588	0.4898	0.466168	0.761406	0.919239	0.71309	1	0.742125	0.497017	0.470578	0.78614	0.454332
GSM387803	0.630765	0.396493	0.346332	0.336897	0.409725	0.766786	0.509267	0.993938	0.634814	0.380556	0.280281	0.617807	0.501805
GSM387804	0.49066	0.282541	0.360893	0.297679	0.597611	0.756976	0.521068	0.97035	0.607093	0.407692	0.219878	0.668278	0.540051
GSM387805	0.505004	0.379875	0.407328	0.361666	0.648972	0.830478	0.642134	0.988254	0.7211	0.452007	0.288966	0.837749	0.562982
GSM387806	0.61144	0.390302	0.461765	0.422305	0.806564	0.833741	0.681539	0.995317	0.733231	0.546568	0.390901	0.729522	0.567017
GSM387807	0.547154	0.380596	0.378178	0.347502	0.270299	0.802357	0.322752	0.991845	0.614393	0.445385	0.119642	0.544752	0.62743
GSM387808	0.3996	0.230854	0.36349	0.293151	0.294372	0.620735	0.406144	0.970133	0.624291	0.366972	0.173435	0.614485	0.468433
GSM387809	0.492359	0.315684	0.372304	0.285706	0.347638	0.709192	0.449318	0.990562	0.605798	0.306837	0.177186	0.495783	0.451491
GSM387810	0.568794	0.322295	0.399796	0.374594	0.471985	0.819545	0.606851	0.991391	0.656153	0.418223	0.384255	0.749772	0.503822
GSM387811	0.479604	0.256016	0.432444	0.332471	0.483409	0.703723	0.58445	0.995316	0.721677	0.442064	0.22515	0.762939	0.439627
GSM387812	0.604494	0.435422	0.422868	0.399403	0.543157	0.809571	0.531238	0.995794	0.719846	0.390511	0.321435	0.832838	0.523745
GSM387813	0.547172	0.363379	0.376256	0.329125	0.662086	0.648258	0.562771	0.982009	0.693042	0.427533	0.198897	0.719926	0.428998
GSM387814	0.615003	0.397575	0.450534	0.436727	0.755064	0.875215	0.678757	0.994466	0.700436	0.563763	0.411077	0.774907	0.553368
GSM387815	0.664709	0.309343	0.373185	0.315567	0.593222	0.747837	0.525673	0.991051	0.63101	0.426226	0.212011	0.648868	0.558371
GSM387816	0.544999	0.394403	0.414572	0.414506	0.852932	0.827254	0.687584	0.991836	0.688555	0.536272	0.375655	0.73836	0.531619
GSM387817	0.644826	0.258871	0.371521	0.277681	0.375497	0.755818	0.484133	0.988989	0.571219	0.384223	0.171637	0.545945	0.536727
GSM387818	0.497077	0.332919	0.373538	0.316874	0.367873	0.622324	0.478497	0.974389	0.543966	0.363154	0.215795	0.449229	0.466716
GSM387819	0.503798	0.401319	0.428908	0.400963	0.51381	0.82062	0.480718	0.974496	0.69342	0.522915	0.23747	0.689612	0.664425
GSM387820	0.67785	0.324701	0.388372	0.336016	0.565344	0.787924	0.583369	0.98933	0.664305	0.470297	0.221397	0.672927	0.55791
GSM387821	0.660835	0.293187	0.362339	0.337666	0.64897	0.795263	0.444859	0.979012	0.605335	0.460603	0.266953	0.749866	0.569758
GSM387822	0.555221	0.343748	0.380044	0.32083	0.378982	0.73648	0.435991	0.99099	0.672024	0.382842	0.165284	0.702924	0.444933
GSM387823	0.294936	0.39577	0.375346	0.380381	0.530543	0.769411	0.593799	0.99054	0.690225	0.417904	0.283602	0.777407	0.487827
GSM387824	0.473595	0.357544	0.410544	0.360492	0.70328	0.784582	0.601077	0.977092	0.638436	0.52919	0.295763	0.746461	0.607518
GSM387825	0.611121	0.426761	0.411895	0.387228	0.605981	0.771724	0.574069	0.992612	0.741995	0.480182	0.323588	0.889577	0.551276
GSM387826	0.458508	0.341917	0.364384	0.32657	0.727397	0.766466	0.530851	0.962593	0.594461	0.464258	0.2731	0.720337	0.566621
GSM387827	0.46648	0.321334	0.382164	0.290997	0.514764	0.706079	0.456478	0.987186	0.595328	0.41521	0.168357	0.621787	0.541877
GSM387828	0.508179	0.387271	0.418068	0.410751	0.767	0.829083	0.697373	0.993823	0.698617	0.502185	0.355782	0.715006	0.411937
GSM387829	0.592043	0.308299	0.414881	0.348853	0.717848	0.810314	0.525492	0.973505	0.65794	0.452626	0.291205	0.69111	0.594271
GSM387830	0.547575	0.360523	0.425721	0.375254	0.731358	0.785663	0.647161	0.987386	0.689492	0.487517	0.331894	0.783247	0.49755
GSM387831	0.535956	0.353646	0.406602	0.380815	0.558653	0.752335	0.555483	0.99234	0.692413	0.485229	0.340314	0.620899	0.486431
GSM387832	0.501508	0.283201	0.392564	0.340991	0.665627	0.81212	0.506126	0.978043	0.673634	0.462954	0.300413	0.795648	0.662584
GSM387833	0.432438	0.30297	0.349934	0.302789	0.317762	0.686536	0.465704	0.982513	0.640446	0.332775	0.200024	0.643163	0.475168
GSM387834	0.406614	0.311219	0.378274	0.325411	0.54818	0.770371	0.463532	0.969175	0.673641	0.429466	0.249373	0.711641	0.577147
GSM387835	0.596549	0.486066	0.457134	0.480754	0.872744	0.862471	0.725621	0.996275	0.76613	0.548481	0.470124	0.836593	0.515833
GSM387836	0.547048	0.347731	0.376186	0.330007	0.475121	0.803233	0.451894	0.985158	0.662048	0.413208	0.249706	0.80987	0.529499
GSM387837	0.407537	0.353745	0.369505	0.312643	0.422998	0.772843	0.48198	0.98641	0.618281	0.458994	0.189602	0.578146	0.529098
GSM387838	0.500124	0.350127	0.403945	0.33665	0.552709	0.782766	0.477501	0.968423	0.618577	0.450791	0.234339	0.706101	0.59796
GSM387839	0.339218	0.390845	0.398928	0.365587	0.735729	0.796926	0.671441	0.995048	0.674124	0.437177	0.31583	0.705099	0.444353
GSM387840	0.482647	0.296195	0.348347	0.305086	0.627637	0.727054	0.471764	0.961791	0.523786	0.455803	0.207338	0.605527	0.541709
GSM387841	0.576983	0.351574	0.433848	0.410919	0.779954	0.852163	0.587405	0.980157	0.685577	0.559909	0.331614	0.736925	0.580482
GSM387842	0.446827	0.457681	0.381649	0.391688	0.574017	0.775447	0.577055	0.995502	0.732226	0.52876	0.297299	0.818718	0.486723
GSM387843	0.346781	0.246416	0.323897	0.278999	0.421104	0.721532	0.494971	0.974522	0.555532	0.343005	0.22124	0.558899	0.371181
GSM387845	0.577621	0.323305	0.393609	0.347283	0.517415	0.788392	0.525406	0.988626	0.716719	0.481386	0.244435	0.681625	0.565587
GSM387846	0.488184	0.414261	0.430099	0.387751	0.668485	0.778549	0.638784	0.99465	0.755366	0.443436	0.324404	0.847443	0.398476
GSM387847	0.497483	0.319547	0.38246	0.354707	0.653776	0.744545	0.46483	0.969376	0.637882	0.504039	0.262336	0.706098	0.716252
GSM387848	0.679486	0.441433	0.454971	0.425343	0.78069	0.774003	0.641289	0.992321	0.745661	0.535882	0.328633	0.843213	0.605594
GSM387849	0.51317	0.324075	0.427054	0.330812	0.553784	0.79051	0.472594	0.988325	0.724128	0.460752	0.225565	0.841128	0.666261
GSM387850	0.522816	0.369138	0.442587	0.407881	0.710582	0.803703	0.598595	0.982415	0.694838	0.513357	0.396722	0.711152	0.655138
GSM387851	0.573835	0.327101	0.382349	0.346588	0.482296	0.809132	0.50217	0.984148	0.687942	0.498495	0.25685	0.748497	0.561385
GSM387852	0.50773	0.363319	0.378076	0.33374	0.490553	0.731996	0.390404	0.966737	0.613429	0.431815	0.217993	0.590456	0.580033
GSM387853	0.5305	0.267818	0.37209	0.314132	0.676854	0.749459	0.54049	0.978223	0.595148	0.497501	0.230125	0.652312	0.567336
GSM387854	0.381739	0.206196	0.28466	0.242571	0.547711	0.696635	0.511376	0.984851	0.43448	0.344215	0.183201	0.454563	0.424769
GSM387855	0.590413	0.338731	0.353918	0.289899	0.216963	0.617303	0.361746	0.94218	0.639519	0.348072	0.104691	0.549351	0.483922
GSM387856	0.499415	0.472291	0.476297	0.41673	0.578329	0.746446	0.669466	0.988906	0.744616	0.472368	0.321187	0.746899	0.426261
GSM387857	0.48235	0.317028	0.415399	0.387493	0.521783	0.765746	0.528727	0.98269	0.636696	0.474672	0.371499	0.691499	0.703753
GSM387858	0.405315	0.404384	0.364444	0.385036	0.573456	0.817878	0.49993	0.991783	0.646178	0.472569	0.291935	0.648073	0.492175
GSM387859	0.548477	0.369025	0.448779	0.442476	0.914595	0.81491	0.716717	0.989624	0.645632	0.608073	0.399551	0.691225	0.658431
GSM387860	0.693092	0.455969	0.476616	0.458342	0.756669	0.875538	0.671808	0.996675	0.755267	0.521489	0.404338	0.839136	0.575039
GSM387861	0.519796	0.391887	0.37749	0.370561	0.438947	0.77011	0.493962	0.984941	0.723455	0.468685	0.22774	0.805809	0.446303
GSM387862	0.598608	0.379497	0.445416	0.389741	0.644777	0.806995	0.644464	0.989385	0.706873	0.46786	0.325578	0.771738	0.709841
GSM387863	0.48342	0.326876	0.436955	0.373184	0.633185	0.745738	0.516126	0.978302	0.637533	0.442601	0.313005	0.631515	0.685004
GSM387864	0.621123	0.44882	0.408662	0.37789	0.640329	0.834163	0.547933	0.994412	0.706496	0.414492	0.32114	0.765555	0.518965
GSM387865	0.476737	0.2888	0.342827	0.325838	0.357748	0.759483	0.38262	0.985278	0.627975	0.444762	0.169898	0.703071	0.524674
GSM387866	0.566738	0.319402	0.406803	0.360494	0.685927	0.774103	0.470647	0.979466	0.688758	0.498092	0.305441	0.687455	0.616437
GSM387867	0.640437	0.358622	0.415404	0.358702	0.351845	0.784576	0.46046	0.982326	0.647293	0.453848	0.282065	0.563706	0.618107
GSM387868	0.564375	0.396816	0.47577	0.424796	0.633083	0.799222	0.648404	0.993194	0.711811	0.550155	0.348663	0.757109	0.692031
GSM387869	0.596564	0.332728	0.390221	0.343901	0.53726	0.819283	0.554944	0.979496	0.676632	0.475293	0.278692	0.77138	0.541701
GSM387870	0.437823	0.311134	0.402045	0.352268	0.614806	0.796742	0.533766	0.993668	0.713505	0.45948	0.299405	0.730141	0.578795
GSM387871	0.588387	0.336587	0.382704	0.328774	0.620677	0.787416	0.524681	0.993432	0.633006	0.433674	0.259019	0.637203	0.524824
GSM387872	0.659074	0.328984	0.380819	0.332857	0.428815	0.7595	0.473667	0.986162	0.702963	0.432537	0.197425	0.828312	0.543701
GSM387873	0.695493	0.416035	0.424835	0.42801	0.725819	0.798586	0.680254	0.996889	0.66712	0.522048	0.414101	0.736639	0.571856
GSM387874	0.558889	0.318403	0.422873	0.355212	0.415562	0.762371	0.517485	0.991101	0.690913	0.445005	0.2446	0.773275	0.549093
GSM387875	0.516811	0.272859	0.38756	0.307422	0.651092	0.748875	0.552018	0.985864	0.618324	0.476517	0.223525	0.616165	0.57523
GSM387876	0.626659	0.363843	0.411036	0.409534	0.824713	0.810676	0.592374	0.984076	0.706807	0.517058	0.371051	0.890311	0.613368
GSM387877	0.629181	0.479537	0.469621	0.496281	0.912221	0.87758	0.761027	0.997524	0.764696	0.598601	0.494752	0.772872	0.468736
GSM387878	0.536166	0.25992	0.373989	0.302872	0.311996	0.684362	0.361547	0.97895	0.61452	0.388651	0.203748	0.588894	0.587023
GSM387879	0.720564	0.284291	0.393195	0.330156	0.637046	0.788609	0.547112	0.988886	0.648726	0.47501	0.202822	0.700681	0.532547
GSM387880	0.55007	0.270803	0.385064	0.327154	0.655754	0.801242	0.475101	0.980428	0.627625	0.420835	0.266506	0.730133	0.593205
GSM387881	0.499325	0.269246	0.350988	0.292279	0.332953	0.74828	0.375462	0.981809	0.598753	0.380672	0.19842	0.629396	0.582317
GSM387882	0.703882	0.347113	0.410408	0.374596	0.39596	0.765906	0.501487	0.993085	0.669297	0.429246	0.314577	0.633162	0.571171
GSM387883	0.63621	0.383661	0.416543	0.381278	0.630654	0.789886	0.621147	0.99338	0.700966	0.473132	0.297792	0.727562	0.549795
GSM387884	0.746981	0.383566	0.399544	0.382324	0.725184	0.775084	0.486072	0.991261	0.697665	0.488268	0.300648	0.800974	0.525883
GSM387885	0.638949	0.387711	0.4306	0.411972	0.596619	0.863359	0.620924	0.993969	0.690203	0.477697	0.418167	0.838089	0.602832
GSM387886	0.637061	0.375784	0.452498	0.40733	0.815269	0.808943	0.649581	0.996966	0.764668	0.534591	0.36498	0.87926	0.537093
GSM387887	0.657501	0.367665	0.431428	0.411787	0.835633	0.837724	0.652626	0.989862	0.72734	0.55426	0.346043	0.877477	0.554913
GSM387888	0.641345	0.297044	0.35884	0.31398	0.367263	0.765531	0.377575	0.988188	0.626282	0.409968	0.185412	0.717569	0.679631
GSM387889	0.644825	0.306781	0.462592	0.366979	0.453884	0.753064	0.60502	0.992953	0.72599	0.463913	0.274609	0.740118	0.608805
GSM387890	0.498416	0.366415	0.36937	0.349851	0.463298	0.743124	0.54033	0.990186	0.600425	0.389164	0.307173	0.530572	0.469654
GSM387891	0.621245	0.339459	0.399814	0.356317	0.69539	0.801971	0.595102	0.985137	0.65365	0.496342	0.279098	0.720217	0.575125
GSM387892	0.566165	0.4042	0.36438	0.325414	0.30908	0.730797	0.457183	0.992075	0.676368	0.410689	0.148935	0.774744	0.420369
GSM387893	0.646824	0.320264	0.389623	0.337458	0.414326	0.746574	0.436758	0.965773	0.606215	0.426236	0.263976	0.587445	0.631545
GSM387894	0.629019	0.353963	0.419577	0.369026	0.554551	0.779536	0.5449	0.991652	0.694608	0.466076	0.343408	0.711228	0.45743
GSM387895	0.645004	0.387945	0.424204	0.385133	0.676809	0.829762	0.588507	0.98328	0.708969	0.500951	0.293184	0.786373	0.533105
GSM387896	0.577267	0.379021	0.383707	0.334102	0.214602	0.763216	0.394451	0.993381	0.686712	0.446093	0.193008	0.8355	0.553653
GSM387897	0.667075	0.342832	0.400688	0.362175	0.646163	0.824886	0.582762	0.989005	0.674924	0.461353	0.302495	0.727267	0.537784
GSM387898	0.52101	0.338966	0.383295	0.335158	0.631828	0.736954	0.515518	0.968046	0.620186	0.475198	0.25382	0.649807	0.550659
GSM387899	0.557325	0.295731	0.375267	0.308366	0.432335	0.782296	0.453036	0.965344	0.614715	0.388086	0.210652	0.604121	0.679447
GSM387900	0.703017	0.28859	0.397344	0.353186	0.684913	0.780382	0.548858	0.990618	0.62876	0.486294	0.338239	0.71118	0.523815
GSM387901	0.490101	0.33821	0.326051	0.262756	0.294839	0.632792	0.337144	0.993506	0.645469	0.252138	0.0927035	0.687961	0.441186
GSM387902	0.66524	0.348169	0.418416	0.389318	0.755957	0.818835	0.605493	0.985626	0.651795	0.464046	0.356077	0.661507	0.574223
GSM387903	0.456448	0.329588	0.328177	0.253763	0.321685	0.596542	0.334081	0.988407	0.589843	0.293528	0.10541	0.639576	0.453685
GSM387904	0.40341	0.317921	0.352406	0.300358	0.636071	0.721407	0.455708	0.989112	0.652891	0.397507	0.151326	0.730129	0.483389
GSM387905	0.586973	0.371063	0.424158	0.381104	0.692202	0.830986	0.562961	0.984966	0.706681	0.481811	0.299827	0.749993	0.627818
GSM387906	0.592341	0.317981	0.397048	0.33382	0.527655	0.759667	0.491628	0.981177	0.636804	0.419103	0.241321	0.691699	0.596907
GSM387907	0.584747	0.375472	0.372975	0.358974	0.352518	0.791337	0.408942	0.991004	0.635298	0.417962	0.223869	0.668197	0.504035
GSM387908	0.539234	0.400377	0.375964	0.369272	0.42902	0.765621	0.485535	0.985417	0.695063	0.442431	0.222997	0.734121	0.414959
GSM387909	0.42214	0.269631	0.348741	0.31074	0.486306	0.746749	0.451108	0.967585	0.61721	0.411749	0.202105	0.705004	0.562924
GSM387910	0.606423	0.272651	0.376336	0.314177	0.61534	0.76095	0.50784	0.992212	0.665605	0.405735	0.235542	0.723411	0.561836
GSM387911	0.601877	0.376535	0.421119	0.409792	0.753832	0.841684	0.59581	0.987766	0.690819	0.529948	0.36348	0.753371	0.605211
GSM387912	0.630409	0.319435	0.401931	0.340026	0.494661	0.775294	0.472398	0.988741	0.68087	0.451624	0.240984	0.683937	0.568348
GSM387913	0.55175	0.282377	0.36087	0.290609	0.431275	0.70317	0.497948	0.981821	0.636607	0.350736	0.215586	0.596221	0.486692
GSM387914	0.434872	0.347899	0.383228	0.349799	0.347288	0.713589	0.422964	0.983604	0.710621	0.41179	0.247272	0.726256	0.485121
GSM387915	0.58684	0.354505	0.433074	0.389451	0.761318	0.816178	0.691699	0.99362	0.718619	0.538536	0.354313	0.771047	0.563668
GSM387916	0.578618	0.316976	0.357443	0.314968	0.465497	0.738339	0.543294	0.994442	0.635299	0.35838	0.237124	0.752193	0.503779
GSM387917	0.671839	0.389997	0.374679	0.351476	0.305854	0.809357	0.466423	0.988618	0.670828	0.426734	0.194791	0.741645	0.478657
GSM387918	0.704011	0.310074	0.401336	0.341969	0.399974	0.695567	0.487579	0.992985	0.656614	0.399234	0.208892	0.729508	0.578449
GSM387919	0.541643	0.355259	0.429939	0.377123	0.521868	0.819505	0.551552	0.990201	0.733753	0.510649	0.271093	0.855823	0.56765
GSM387920	0.54378	0.311264	0.368995	0.303507	0.415171	0.73876	0.461114	0.992442	0.58273	0.350946	0.222162	0.533897	0.478578
GSM387921	0.586536	0.401779	0.431396	0.394947	0.677027	0.805658	0.646295	0.993614	0.707543	0.50062	0.355504	0.731644	0.559809
GSM387922	0.557072	0.360678	0.401714	0.375143	0.758692	0.7469	0.650726	0.994408	0.659337	0.44549	0.343001	0.708437	0.396935
GSM387923	0.514066	0.349799	0.351264	0.32795	0.331475	0.739246	0.419184	0.985649	0.628511	0.403228	0.184713	0.647361	0.488355
GSM387924	0.676485	0.351438	0.4096	0.368314	0.640258	0.79194	0.575262	0.994867	0.691995	0.454785	0.318807	0.869618	0.607398
GSM387925	0.631219	0.382905	0.413629	0.376742	0.619842	0.806493	0.56322	0.985244	0.68446	0.439042	0.348885	0.709612	0.618533
GSM387926	0.58629	0.348601	0.380069	0.379831	0.507411	0.790392	0.576636	0.994649	0.733651	0.468673	0.256658	0.807911	0.495765
GSM387927	0.633239	0.384871	0.435832	0.443942	0.857222	0.868145	0.740288	0.998536	0.726819	0.530282	0.337825	0.804478	0.410724
GSM387928	0.456481	0.491394	0.46605	0.48575	0.878503	0.887717	0.746405	0.998004	0.740377	0.583206	0.452171	0.747719	0.496007
GSM387929	0.547137	0.357329	0.415557	0.337483	0.402722	0.754008	0.541104	0.980244	0.677295	0.448751	0.216967	0.711493	0.542611
GSM387930	0.59569	0.424086	0.444324	0.432622	0.760778	0.822304	0.678237	0.993001	0.680825	0.536056	0.377548	0.638256	0.471826
GSM387931	0.497838	0.340441	0.43222	0.392505	0.461663	0.777281	0.474922	0.98469	0.621382	0.476706	0.386036	0.650774	0.71552
GSM387932	0.458522	0.278905	0.349036	0.300101	0.446245	0.719833	0.50209	0.983709	0.549684	0.40734	0.261949	0.564794	0.510267
GSM387933	0.673501	0.393292	0.403243	0.384824	0.706185	0.801956	0.536754	0.984955	0.65939	0.52936	0.284852	0.724856	0.530656
GSM387934	0.731548	0.420422	0.451052	0.442843	0.706292	0.817772	0.617878	0.994602	0.71042	0.546492	0.410038	0.729891	0.547486
GSM387935	0.616669	0.326128	0.410387	0.352844	0.614433	0.767287	0.587903	0.993516	0.717757	0.448408	0.297819	0.776765	0.513333
GSM387936	0.452746	0.354986	0.423014	0.399761	0.633043	0.773204	0.53419	0.988164	0.675344	0.482813	0.345706	0.710837	0.721541
GSM387938	0.665418	0.339638	0.390286	0.294816	0.576474	0.736403	0.578946	0.985173	0.676683	0.400059	0.171156	0.670063	0.589604
GSM387939	0.594398	0.346069	0.398972	0.35514	0.455631	0.775125	0.500532	0.982875	0.615996	0.37183	0.317167	0.537067	0.533779
GSM387940	0.510158	0.388554	0.425207	0.370955	0.728288	0.821019	0.609725	0.986052	0.689368	0.471139	0.316764	0.715779	0.561118
GSM387941	0.579599	0.348016	0.442677	0.414016	0.634718	0.845077	0.611511	0.994891	0.74225	0.511299	0.33945	0.768171	0.43922
GSM387942	0.49909	0.296819	0.359656	0.271351	0.240842	0.705299	0.37898	0.976631	0.669544	0.371344	0.145284	0.781405	0.565218
GSM387943	0.493409	0.185418	0.355659	0.277352	0.570484	0.78649	0.551169	0.990887	0.613119	0.424496	0.194458	0.749653	0.49487
GSM387944	0.605615	0.367324	0.402268	0.360502	0.628682	0.789964	0.519724	0.990908	0.655174	0.409063	0.320054	0.631789	0.519035
GSM387945	0.491956	0.382622	0.402779	0.381234	0.460267	0.702092	0.531563	0.991253	0.730676	0.449764	0.268291	0.850255	0.491213
GSM387946	0.542658	0.385052	0.454702	0.403029	0.76881	0.854119	0.677931	0.992507	0.693567	0.494359	0.38372	0.661598	0.598358
GSM387947	0.60022	0.374196	0.435618	0.411791	0.66059	0.798395	0.603593	0.991175	0.732213	0.498045	0.35705	0.765895	0.617396
GSM387948	0.617578	0.365979	0.40411	0.347304	0.665234	0.766585	0.583383	0.993962	0.724115	0.481674	0.196034	0.812013	0.567137
GSM387949	0.590332	0.355758	0.361755	0.332969	0.626781	0.778307	0.437103	0.994838	0.684098	0.443539	0.255956	0.718977	0.455132
GSM387950	0.493947	0.422301	0.435413	0.441324	0.768956	0.841206	0.700027	0.996115	0.716296	0.539349	0.476432	0.787531	0.632347
GSM387951	0.659409	0.425666	0.385861	0.341475	0.611722	0.898998	0.538217	0.995345	0.700123	0.396851	0.226878	0.85105	0.534488
GSM387952	0.702924	0.449309	0.392192	0.39957	0.781744	0.760791	0.6411	0.997258	0.710983	0.494994	0.30519	0.847096	0.46488
GSM387953	0.685198	0.481063	0.469742	0.468031	0.836533	0.836502	0.686938	0.994924	0.762129	0.537414	0.424547	0.887812	0.453993
GSM387954	0.607658	0.46242	0.398154	0.419931	0.397239	0.762072	0.502778	0.985264	0.670912	0.428255	0.387672	0.721524	0.488147
GSM387955	0.538111	0.323832	0.374874	0.319161	0.494336	0.73122	0.455696	0.982725	0.666447	0.426598	0.222607	0.715109	0.514427
GSM387956	0.62656	0.320954	0.385686	0.334753	0.267683	0.779292	0.408279	0.986006	0.592875	0.427071	0.278437	0.61343	0.538867
GSM387957	0.514412	0.399891	0.393709	0.325833	0.548682	0.770468	0.427792	0.981511	0.604712	0.385348	0.243472	0.645708	0.555956
GSM387958	0.428937	0.162231	0.241869	0.240947	0.248197	0.712356	0.344401	0.981568	0.372548	0.380832	0.149167	0.5103	0.354246
GSM387959	0.51895	0.513572	0.460527	0.501608	0.923232	0.877981	0.742033	0.99654	0.750194	0.614018	0.45805	0.804458	0.490539
GSM387960	0.489381	0.263117	0.341999	0.284977	0.275831	0.758616	0.315542	0.974294	0.578734	0.419176	0.155453	0.653325	0.641133
GSM387961	0.557902	0.384251	0.431252	0.383186	0.763705	0.803689	0.637157	0.992529	0.721287	0.490493	0.298913	0.814673	0.612993
GSM387962	0.564624	0.44514	0.425785	0.398723	0.68175	0.818812	0.600932	0.992534	0.71233	0.461425	0.348238	0.81853	0.604095
GSM387963	0.652921	0.402428	0.429292	0.424583	0.694552	0.888853	0.668632	0.997285	0.742571	0.554498	0.369498	0.83248	0.501196
GSM387964	0.422962	0.447928	0.408449	0.439614	0.753626	0.777473	0.649955	0.993161	0.754925	0.568599	0.366664	0.909842	0.444862
GSM387965	0.587058	0.397212	0.436823	0.393734	0.423704	0.824976	0.509397	0.998962	0.723089	0.476258	0.336001	0.855672	0.599324
GSM387966	0.616473	0.20583	0.34507	0.242917	0.264208	0.632405	0.332863	0.978904	0.549816	0.344718	0.125945	0.479225	0.463744
GSM387967	0.550621	0.297887	0.427699	0.367102	0.567542	0.754479	0.539909	0.992036	0.583711	0.496953	0.371425	0.583736	0.721907
GSM387968	0.620307	0.435323	0.395194	0.358557	0.393268	0.749039	0.494795	0.995291	0.69984	0.425256	0.230012	0.745676	0.460669
GSM387969	0.571125	0.502509	0.482729	0.553912	0.935053	0.932301	0.789195	0.994068	0.702164	0.712412	0.599392	0.810651	0.547521
GSM387970	0.530543	0.378481	0.397783	0.352491	0.291094	0.59446	0.240252	0.988609	0.645008	0.400907	0.185898	0.604973	0.455606
GSM387971	0.414129	0.319619	0.434577	0.404336	0.615112	0.794684	0.577649	0.991525	0.681929	0.480873	0.348406	0.622707	0.460679
GSM387972	0.447401	0.399556	0.414627	0.383126	0.504089	0.809957	0.559657	0.99301	0.652065	0.394127	0.35831	0.647824	0.503412
GSM387973	0.458901	0.340877	0.399409	0.347291	0.596926	0.809054	0.569273	0.995663	0.678751	0.421675	0.251235	0.708133	0.602731
GSM387974	0.602868	0.468995	0.449843	0.482445	0.95065	0.861879	0.710397	0.99795	0.714714	0.626346	0.439052	0.79602	0.589056
GSM387975	0.393191	0.461858	0.417873	0.416684	0.731413	0.901127	0.70873	0.998536	0.742475	0.517271	0.329154	0.765928	0.45515
GSM387976	0.513281	0.261869	0.402804	0.327506	0.579057	0.740149	0.561599	0.99083	0.674968	0.42236	0.296983	0.712361	0.544552
GSM387977	0.628769	0.363665	0.425798	0.382026	0.631586	0.825177	0.598545	0.99298	0.711954	0.478558	0.327767	0.746715	0.569699
GSM387978	0.471377	0.27057	0.349964	0.303926	0.603264	0.762681	0.517851	0.966677	0.625494	0.42834	0.187524	0.699613	0.542868
GSM387979	0.522572	0.305149	0.350599	0.286081	0.599292	0.691471	0.490553	0.994604	0.642827	0.388422	0.153973	0.690391	0.578584
GSM387980	0.564754	0.283972	0.370599	0.287996	0.553701	0.667241	0.490422	0.98782	0.670917	0.42404	0.123112	0.779729	0.515354
GSM387981	0.536762	0.302877	0.392509	0.328053	0.374143	0.685343	0.470264	0.992318	0.703431	0.406156	0.20547	0.799816	0.517914
GSM387982	0.663109	0.292999	0.373812	0.331715	0.688554	0.780823	0.598288	0.9805	0.611942	0.435699	0.284618	0.704623	0.511392
GSM387983	0.527912	0.382667	0.407913	0.365164	0.586233	0.758988	0.547399	0.987354	0.678225	0.44132	0.316279	0.674814	0.54041
GSM387984	0.222723	0.340274	0.393796	0.308408	0.484263	0.577636	0.597901	0.978337	0.639915	0.416976	0.209519	0.490456	0.462617
GSM387985	0.687212	0.335177	0.377584	0.340159	0.365454	0.769426	0.447537	0.992345	0.618612	0.438717	0.223949	0.566425	0.575745
GSM387986	0.490672	0.239519	0.318066	0.271568	0.238565	0.699137	0.411155	0.972931	0.545744	0.316406	0.157918	0.586577	0.467489
GSM387987	0.380073	0.345381	0.309536	0.296557	0.340601	0.703941	0.436618	0.982291	0.607223	0.343439	0.199564	0.61354	0.451195
GSM858082	0.636862	0.543237	0.483222	0.511853	0.881115	0.867185	0.754223	0.998216	0.785291	0.658149	0.436268	0.870723	0.493898
GSM858083	0.400931	0.466816	0.43412	0.427114	0.688541	0.795587	0.670693	0.997843	0.737565	0.530098	0.372923	0.742884	0.482395
GSM858084	0.657101	0.322813	0.438569	0.351843	0.495732	0.758942	0.490852	0.987225	0.687103	0.438158	0.26159	0.654408	0.613556
GSM858085	0.345566	0.241911	0.39254	0.327161	0.759819	0.753383	0.678253	0.994996	0.622534	0.430822	0.293295	0.659943	0.445057
GSM858086	0.550466	0.352127	0.351192	0.341228	0.400544	0.725198	0.383921	0.982961	0.630492	0.40181	0.19592	0.702847	0.471784
GSM858087	0.51561	0.344752	0.421061	0.367973	0.563982	0.804691	0.515608	0.987324	0.662506	0.402393	0.310992	0.616156	0.52719
GSM858088	0.67337	0.323511	0.431913	0.392442	0.68077	0.838881	0.667748	0.99734	0.725996	0.515784	0.321111	0.826315	0.518182
GSM858089	0.548122	0.270323	0.3641	0.298719	0.561496	0.751334	0.449551	0.965275	0.604155	0.439721	0.163185	0.690173	0.713482
GSM858090	0.581099	0.259522	0.359952	0.300953	0.558335	0.745468	0.517043	0.978777	0.584943	0.418906	0.244958	0.61335	0.58186
GSM858091	0.582165	0.374625	0.455749	0.368119	0.761662	0.786115	0.639865	0.981622	0.669061	0.466364	0.334596	0.713741	0.721073
GSM858092	0.534205	0.324676	0.384236	0.313952	0.534054	0.72461	0.493402	0.98034	0.636674	0.40912	0.235378	0.612637	0.589772
GSM858093	0.608393	0.310136	0.417385	0.390495	0.747377	0.835148	0.69616	0.995983	0.696302	0.51322	0.375762	0.699705	0.503323
GSM858094	0.585171	0.449611	0.421022	0.413871	0.715683	0.841399	0.613661	0.995502	0.712668	0.502334	0.377036	0.816456	0.544848
GSM858095	0.409547	0.322793	0.367995	0.288857	0.551298	0.75149	0.49401	0.986555	0.617316	0.368246	0.228553	0.483616	0.512336
GSM858096	0.540625	0.328999	0.411444	0.411132	0.743662	0.85464	0.638859	0.981621	0.659808	0.540324	0.374812	0.764587	0.645842
GSM858097	0.449631	0.34085	0.39936	0.339575	0.661548	0.751899	0.664397	0.990877	0.694954	0.436141	0.271127	0.81513	0.474787
GSM858098	0.44241	0.343575	0.326791	0.314268	0.209233	0.710793	0.361433	0.98635	0.622288	0.343459	0.213948	0.552315	0.43905
GSM858099	0.330302	0.364226	0.406585	0.352019	0.558508	0.780004	0.534643	0.987618	0.62882	0.372583	0.353608	0.583929	0.386309
GSM858100	0.582507	0.312662	0.379665	0.327606	0.462207	0.819389	0.496294	0.985837	0.669113	0.43024	0.168599	0.755367	0.587236
GSM858101	0.360299	0.375072	0.417252	0.337232	0.534127	0.755278	0.544912	0.996433	0.669835	0.390953	0.217981	0.640719	0.486484
GSM858102	0.518874	0.405212	0.361646	0.347328	0.497318	0.792462	0.445907	0.99654	0.603393	0.456089	0.213294	0.642427	0.453758
GSM858103	0.463798	0.363201	0.374218	0.329383	0.254396	0.678854	0.431261	0.956303	0.588323	0.355457	0.2159	0.542403	0.468928
GSM858104	0.61694	0.277432	0.335953	0.322368	0.43136	0.763835	0.379604	0.971125	0.608976	0.40037	0.202241	0.757906	0.672296
GSM858105	0.546348	0.446109	0.44597	0.466368	0.824843	0.881933	0.734732	0.995767	0.762931	0.622504	0.445882	0.753289	0.50604
GSM858106	0.4719	0.334206	0.424392	0.352442	0.713896	0.772877	0.639109	0.987631	0.707353	0.461996	0.305387	0.831209	0.603066
GSM858107	0.616821	0.428957	0.477917	0.446868	0.689872	0.837388	0.624422	0.992104	0.766496	0.551213	0.425135	0.85315	0.636075
GSM858108	0.424173	0.303077	0.336984	0.276075	0.215605	0.634664	0.299854	0.991552	0.625922	0.229041	0.165542	0.684737	0.436365
GSM858109	0.660019	0.401031	0.414036	0.346156	0.58711	0.725203	0.465715	0.992415	0.720703	0.458734	0.194151	0.844322	0.485937
GSM858110	0.543479	0.238674	0.36349	0.293442	0.566319	0.785689	0.539811	0.973152	0.534735	0.371841	0.223285	0.573852	0.586306
GSM858111	0.548938	0.501631	0.452641	0.467099	0.809763	0.865791	0.706992	0.996195	0.749955	0.572805	0.469239	0.892305	0.540292
GSM858112	0.563226	0.441478	0.380079	0.380468	0.46308	0.71131	0.556208	0.993622	0.703272	0.384755	0.304159	0.933238	0.43665
GSM858113	0.769479	0.285661	0.391486	0.344751	0.599352	0.804548	0.570999	0.989491	0.663311	0.432315	0.267741	0.770091	0.492212
GSM858114	0.581292	0.336957	0.418311	0.370526	0.601966	0.831813	0.567573	0.982371	0.609294	0.511356	0.353126	0.664088	0.731841
GSM858115	0.654112	0.337163	0.38283	0.370259	0.578079	0.827023	0.569739	0.993722	0.697999	0.480594	0.26454	0.84351	0.488606
GSM858116	0.533498	0.263561	0.335477	0.302654	0.4257	0.76095	0.456536	0.988179	0.62239	0.338777	0.259753	0.661996	0.488622
GSM858117	0.621709	0.420749	0.401592	0.398247	0.590701	0.775061	0.533897	0.986177	0.702999	0.46128	0.340002	0.865527	0.52333
GSM858118	0.579171	0.37885	0.432348	0.361723	0.617365	0.797449	0.511172	0.989298	0.684535	0.443009	0.300191	0.715475	0.639565
GSM858119	0.559792	0.246474	0.309086	0.264374	0.230098	0.661296	0.248646	0.969334	0.522651	0.382761	0.122985	0.601456	0.706505
GSM858120	0.483192	0.344561	0.352385	0.308384	0.419932	0.688592	0.469607	0.985401	0.648911	0.336989	0.215297	0.669202	0.472251
GSM858121	0.534804	0.349584	0.410813	0.375188	0.445381	0.771763	0.521664	0.995559	0.696254	0.458429	0.218482	0.781695	0.508145
GSM858122	0.678733	0.349206	0.38005	0.351679	0.642856	0.782352	0.468773	0.991449	0.640195	0.469666	0.250447	0.719799	0.495901
GSM858123	0.461168	0.34684	0.383926	0.33856	0.405598	0.720472	0.465497	0.978461	0.630436	0.358776	0.256022	0.652724	0.483198
GSM858124	0.485251	0.290385	0.358126	0.28414	0.298793	0.727043	0.385333	0.97448	0.619368	0.384734	0.12455	0.62242	0.49505
GSM858125	0.626637	0.343128	0.432233	0.379574	0.738012	0.821419	0.603803	0.987372	0.660298	0.508894	0.38433	0.622378	0.570551
GSM858126	0.65274	0.307487	0.358037	0.332555	0.604562	0.769896	0.475843	0.987626	0.650647	0.46851	0.215463	0.725106	0.538005
GSM858127	0.62399	0.378053	0.409556	0.371764	0.638146	0.777478	0.519214	0.984199	0.628907	0.459234	0.342708	0.601195	0.581789
GSM858128	0.706144	0.304763	0.38611	0.336299	0.604112	0.797956	0.508767	0.98913	0.692868	0.484617	0.186935	0.717953	0.477235
GSM858129	0.596172	0.317605	0.413005	0.321388	0.420336	0.717337	0.509637	0.985868	0.697977	0.436207	0.222735	0.736666	0.603154
GSM858130	0.49488	0.253485	0.330071	0.267803	0.425465	0.723474	0.391512	0.968007	0.510844	0.370029	0.175764	0.551072	0.547597
GSM858131	0.445699	0.379218	0.418568	0.40824	0.834238	0.872882	0.661535	0.994281	0.696682	0.544972	0.372324	0.826669	0.641962
GSM858132	0.684586	0.349217	0.4008	0.394794	0.807213	0.842101	0.630648	0.989988	0.64412	0.52719	0.35373	0.705247	0.556749
GSM858133	0.437866	0.298409	0.326619	0.271221	0.141039	0.578411	0.322169	0.943172	0.606487	0.304356	0.133679	0.479743	0.479159
GSM858134	0.674235	0.497651	0.500381	0.555817	0.934695	0.857273	0.816871	0.99827	0.739669	0.722605	0.570795	0.794545	0.571782
GSM858135	0.544158	0.470321	0.513672	0.442828	0.768285	0.788036	0.698618	0.995345	0.758937	0.49214	0.397141	0.81442	0.505353
GSM858136	0.560829	0.44624	0.43037	0.419267	0.803426	0.833877	0.590688	0.987555	0.729238	0.502444	0.356997	0.812947	0.656586
GSM858137	0.601151	0.367195	0.379027	0.32208	0.30853	0.698395	0.376531	0.993693	0.742561	0.391415	0.109377	0.885332	0.465926
GSM1379261	0.461737	0.334028	0.4127	0.337139	0.631532	0.789574	0.594525	0.994571	0.659698	0.455401	0.247493	0.68972	0.507425
GSM1379262	0.579231	0.314824	0.408996	0.399454	0.432344	0.787986	0.559528	0.983485	0.638692	0.43946	0.361568	0.628814	0.487147
GSM1379263	0.605809	0.294466	0.424408	0.354886	0.562446	0.74127	0.565993	0.967125	0.62685	0.422485	0.295319	0.655997	0.529254
GSM1379264	0.38908	0.411343	0.426398	0.392291	0.73452	0.848192	0.71962	0.999068	0.720199	0.542388	0.352076	0.857655	0.530444
GSM1379265	0.626813	0.349993	0.399161	0.40142	0.687926	0.824695	0.576766	0.97878	0.643301	0.511552	0.345664	0.664556	0.704698
GSM1379266	0.621656	0.453213	0.44526	0.421572	0.745042	0.797377	0.646073	0.99404	0.765028	0.521382	0.382819	0.873116	0.486693
GSM1379267	0.603233	0.372307	0.412836	0.37884	0.353512	0.767744	0.444579	0.983357	0.621432	0.448907	0.23068	0.692617	0.711252
GSM1379268	0.623128	0.309623	0.401916	0.37765	0.533771	0.792394	0.551038	0.989206	0.682888	0.476861	0.335925	0.86748	0.486899
GSM1379269	0.684587	0.338659	0.413052	0.377678	0.653158	0.815997	0.506135	0.973519	0.695501	0.482875	0.301458	0.824534	0.758465
GSM1379270	0.426379	0.26337	0.350996	0.29908	0.647988	0.648851	0.545182	0.978705	0.563294	0.380594	0.25572	0.51076	0.492066
GSM1379271	0.59031	0.442397	0.447337	0.441526	0.816773	0.833493	0.718014	0.997152	0.745512	0.579091	0.407263	0.713415	0.49463
GSM1379272	0.620541	0.370502	0.43012	0.365336	0.576695	0.788365	0.548068	0.990981	0.682796	0.42236	0.307782	0.683647	0.532928
GSM1379273	0.617569	0.32654	0.348499	0.301996	0.449025	0.716441	0.369917	0.980018	0.578123	0.420616	0.182548	0.620575	0.502042
GSM1379274	0.548845	0.377702	0.38407	0.355763	0.734618	0.822121	0.613941	0.98852	0.682986	0.492187	0.26115	0.755513	0.465615
GSM1379275	0.449421	0.326441	0.383283	0.331937	0.316029	0.711216	0.454424	0.993646	0.728124	0.415207	0.225247	0.836242	0.528205
GSM1379276	0.604578	0.355954	0.429459	0.358432	0.457063	0.750262	0.524744	0.979072	0.697503	0.433394	0.293629	0.742693	0.621826
GSM1379277	0.528704	0.457566	0.429962	0.400148	0.643992	0.815174	0.665574	0.996248	0.683288	0.496737	0.275545	0.719935	0.537416
GSM1379278	0.640904	0.411748	0.359757	0.346051	0.361427	0.81941	0.363047	0.99229	0.650028	0.379574	0.175746	0.737975	0.507437
GSM1379279	0.563256	0.343628	0.387899	0.307711	0.401389	0.739908	0.356231	0.985663	0.660342	0.392174	0.150632	0.672838	0.530573
GSM1379280	0.561561	0.277758	0.383431	0.29727	0.374179	0.650015	0.399851	0.963472	0.654988	0.406467	0.169434	0.738189	0.549042
GSM1379281	0.5501	0.359492	0.476414	0.400707	0.758775	0.811403	0.632347	0.992184	0.744277	0.524394	0.351738	0.810065	0.540454
GSM1379282	0.609728	0.317862	0.390022	0.351414	0.726863	0.691004	0.622684	0.994254	0.716021	0.447215	0.283074	0.817852	0.490463
GSM1379283	0.590989	0.424836	0.423794	0.381692	0.499392	0.809753	0.462482	0.977811	0.68984	0.458625	0.245589	0.738704	0.724994
GSM1379284	0.543888	0.346552	0.353403	0.316009	0.408325	0.737879	0.368725	0.973693	0.682861	0.376749	0.164361	0.683917	0.510732
GSM1379285	0.685536	0.376561	0.403829	0.365054	0.596947	0.832529	0.566174	0.991681	0.715492	0.447829	0.284969	0.856396	0.526594
GSM1379286	0.467439	0.303366	0.358948	0.299578	0.477254	0.719545	0.435307	0.985185	0.617289	0.354324	0.213569	0.630612	0.461708
GSM1379287	0.60837	0.333266	0.398088	0.362864	0.585832	0.752771	0.53846	0.991123	0.68368	0.455596	0.309434	0.775906	0.468589
GSM1379288	0.518	0.392894	0.376857	0.326347	0.419207	0.720549	0.374185	0.965519	0.5588	0.36995	0.252929	0.551299	0.501723
GSM1379289	0.625104	0.363025	0.362518	0.316668	0.282946	0.690135	0.330441	0.986858	0.658466	0.390903	0.10641	0.674618	0.49984
GSM1379290	0.560226	0.347908	0.420229	0.404042	0.582291	0.844601	0.573057	0.986597	0.704118	0.452031	0.306269	0.769022	0.645459
GSM1379291	0.58102	0.364004	0.427232	0.392701	0.797522	0.800852	0.679986	0.995422	0.712697	0.548904	0.327558	0.678293	0.484617
GSM1379292	0.469138	0.309094	0.330943	0.287193	0.315378	0.698873	0.330744	0.969092	0.551742	0.342589	0.206524	0.503542	0.534875
GSM1379293	0.493724	0.287667	0.344634	0.300023	0.374299	0.687246	0.402848	0.970958	0.507947	0.393742	0.223722	0.519062	0.504456
GSM1379294	0.557713	0.373939	0.3897	0.361515	0.620727	0.764297	0.59928	0.977785	0.636895	0.413675	0.311073	0.623634	0.520941
GSM1379295	0.630076	0.376456	0.447313	0.41676	0.715106	0.846111	0.645642	0.989116	0.670685	0.468335	0.39793	0.789556	0.587076
GSM1379296	0.374387	0.394834	0.351027	0.329026	0.418745	0.743469	0.433572	0.985717	0.624134	0.370935	0.21681	0.626447	0.495652
GSM1379297	0.671917	0.384326	0.392285	0.362533	0.531983	0.773374	0.572198	0.997259	0.650947	0.461678	0.262055	0.709435	0.495441
GSM1379298	0.572141	0.297971	0.422333	0.351169	0.575314	0.746454	0.385504	0.972292	0.6085	0.444651	0.256563	0.622513	0.761518
GSM1379299	0.549919	0.301566	0.327311	0.310652	0.420727	0.71407	0.458291	0.99529	0.636163	0.370761	0.265572	0.769018	0.465251
GSM1379300	0.437832	0.378991	0.387415	0.357534	0.541588	0.705338	0.545581	0.978566	0.629838	0.383086	0.23129	0.75944	0.537856
GSM1379301	0.430471	0.345624	0.412106	0.405293	0.84116	0.818173	0.715356	0.995076	0.702686	0.597302	0.446909	0.765765	0.47968
GSM1379302	0.188126	0.242865	0.331875	0.251616	0.442445	0.654421	0.407061	0.975948	0.547277	0.310708	0.166653	0.448559	0.485152
GSM1379303	0.528843	0.416964	0.411551	0.392877	0.578763	0.810939	0.559136	0.990542	0.690765	0.416174	0.360984	0.669357	0.597527
GSM1379304	0.381631	0.342847	0.395354	0.32057	0.501266	0.72698	0.449667	0.980359	0.643751	0.370313	0.255489	0.5999	0.572042
GSM1379305	0.562709	0.312351	0.362683	0.326064	0.529674	0.73827	0.560283	0.993482	0.681193	0.426231	0.233586	0.694475	0.48081
GSM1379306	0.605661	0.400008	0.425614	0.365078	0.700061	0.824914	0.633478	0.997551	0.721467	0.456639	0.354055	0.796846	0.485834
GSM1379307	0.66789	0.570075	0.506334	0.584228	0.943004	0.922827	0.783613	0.99827	0.794182	0.719735	0.605747	0.876095	0.641657
GSM1379308	0.645434	0.318974	0.404041	0.395598	0.818385	0.872973	0.704782	0.997739	0.701097	0.518502	0.337787	0.847497	0.445417
GSM1379309	0.599218	0.284071	0.382906	0.32328	0.496087	0.778019	0.517841	0.989562	0.655509	0.425841	0.2555	0.79667	0.52141
GSM1379310	0.640792	0.290079	0.370901	0.323006	0.529794	0.779847	0.504775	0.975869	0.628036	0.423694	0.248655	0.712815	0.688325
GSM1379311	0.560769	0.273409	0.373272	0.317661	0.418666	0.779192	0.454532	0.989682	0.613578	0.35346	0.231569	0.581053	0.498611
GSM1379312	0.493438	0.246734	0.356081	0.314885	0.526137	0.742572	0.459166	0.962654	0.556356	0.406566	0.225498	0.701157	0.570625
GSM1379313	0.634431	0.332163	0.372874	0.347814	0.524638	0.762541	0.509885	0.980861	0.619953	0.433173	0.263633	0.688614	0.557882
GSM1379314	0.521771	0.242717	0.36204	0.296032	0.247279	0.795722	0.329177	0.97697	0.615125	0.331989	0.13411	0.662988	0.612654
GSM1379315	0.538759	0.353037	0.416739	0.407653	0.902062	0.803246	0.735167	0.997605	0.709237	0.547102	0.365993	0.750051	0.505634
GSM1379316	0.5654	0.309535	0.369217	0.289761	0.391519	0.732634	0.422811	0.992581	0.669639	0.353115	0.174335	0.596496	0.512214
GSM1379317	0.595434	0.433768	0.448814	0.441885	0.792182	0.81553	0.691474	0.99654	0.745945	0.533761	0.455039	0.823307	0.544912
GSM1379318	0.574246	0.434221	0.456728	0.471485	0.828093	0.878687	0.733797	0.999281	0.74646	0.645616	0.424986	0.886062	0.454999
GSM1379319	0.651324	0.369333	0.37251	0.352289	0.473598	0.741773	0.509759	0.988672	0.623085	0.429435	0.297226	0.641005	0.478204
GSM1379320	0.460984	0.364616	0.424185	0.409739	0.773455	0.749616	0.644729	0.996223	0.688882	0.494305	0.400233	0.781569	0.524225
GSM1379321	0.52601	0.32739	0.356822	0.275383	0.299631	0.69228	0.39804	0.978789	0.68304	0.331716	0.112616	0.732706	0.520233
GSM1379322	0.482602	0.436105	0.418512	0.40592	0.704835	0.821166	0.647929	0.993587	0.722219	0.562809	0.319125	0.86675	0.507585
GSM1379323	0.58561	0.335554	0.35271	0.291803	0.372544	0.750248	0.42798	0.993429	0.668843	0.358343	0.209737	0.836512	0.503133
GSM1379324	0.602804	0.285268	0.386106	0.297149	0.421756	0.721075	0.484435	0.988648	0.694178	0.412948	0.202435	0.790637	0.528564
GSM1379325	0.60606	0.337605	0.400152	0.354124	0.669454	0.741058	0.609418	0.978445	0.694758	0.487562	0.261447	0.689045	0.499255
GSM1379326	0.576479	0.407205	0.381815	0.348787	0.585784	0.794412	0.526619	0.992555	0.674454	0.389705	0.25326	0.784983	0.504833
GSM1379327	0.407344	0.324249	0.371958	0.339601	0.700991	0.777905	0.631928	0.994494	0.571946	0.402156	0.26695	0.525666	0.465036
GSM1379328	0.646058	0.549183	0.484336	0.558058	0.926317	0.89951	0.809583	0.998856	0.780968	0.72433	0.512542	0.887464	0.607903
GSM1379329	0.446887	0.399607	0.360842	0.310691	0.420862	0.734136	0.470136	0.986652	0.610399	0.359234	0.199903	0.548094	0.464909
GSM1379330	0.635759	0.315623	0.415279	0.378361	0.711538	0.841635	0.558777	0.97058	0.651323	0.509889	0.340231	0.744701	0.716683
GSM1523727	0.60901	0.301927	0.342105	0.280328	0.362034	0.77121	0.403576	0.992501	0.600496	0.366087	0.182025	0.630038	0.497647
GSM1523728	0.560671	0.413981	0.422584	0.375821	0.653587	0.783844	0.611597	0.996035	0.70946	0.46307	0.232137	0.790011	0.523792
GSM1523729	0.649307	0.307516	0.367127	0.296505	0.414928	0.756952	0.444678	0.986965	0.653328	0.40007	0.176058	0.662572	0.573462
GSM1523744	0.545868	0.369807	0.38209	0.344282	0.389717	0.754759	0.528231	0.986859	0.683636	0.41664	0.220307	0.797254	0.473633
GSM1523745	0.407669	0.328736	0.382016	0.300076	0.461391	0.710083	0.488274	0.970128	0.646909	0.382275	0.211702	0.70334	0.482384
GSM1523746	0.472109	0.197834	0.340596	0.277141	0.523987	0.695104	0.377868	0.974049	0.558649	0.364961	0.220904	0.53601	0.510995
GSM1523747	0.346033	0.3112	0.347079	0.291239	0.425747	0.710323	0.409561	0.954719	0.590066	0.333243	0.227907	0.635974	0.445343
GSM1523748	0.604155	0.296183	0.390881	0.317434	0.528608	0.776727	0.423638	0.981291	0.643563	0.433215	0.213537	0.69861	0.561267
GSM1523765	0.443015	0.40509	0.341196	0.31024	0.390789	0.665657	0.370721	0.968015	0.525225	0.329914	0.210918	0.379392	0.471605
GSM1523768	0.505073	0.415809	0.442491	0.385518	0.54227	0.781301	0.515221	0.981386	0.679384	0.443604	0.303096	0.667915	0.556799
GSM1523769	0.620835	0.357092	0.454957	0.419008	0.710055	0.80319	0.670278	0.991477	0.706141	0.544511	0.36991	0.706154	0.630301
GSM1523770	0.618153	0.377381	0.395719	0.412988	0.813957	0.857283	0.704567	0.998057	0.69741	0.541456	0.325939	0.864931	0.451812
GSM1523771	0.550716	0.405368	0.41542	0.400011	0.691872	0.795363	0.544826	0.983844	0.673944	0.505827	0.341669	0.769694	0.69267
GSM1523772	0.555743	0.320471	0.391356	0.339632	0.558753	0.7529	0.552837	0.987969	0.675328	0.431268	0.234564	0.773434	0.55244
GSM1523773	0.500305	0.320725	0.405439	0.371028	0.650995	0.804164	0.519491	0.981996	0.64628	0.457536	0.311741	0.710076	0.649019
GSM1523774	0.646094	0.256783	0.395688	0.32787	0.556025	0.789594	0.476487	0.971358	0.596931	0.461389	0.273305	0.67842	0.594941
GSM1523775	0.416775	0.307988	0.372695	0.314872	0.529227	0.71452	0.484993	0.972179	0.615672	0.399282	0.274223	0.556521	0.480159
GSM1523776	0.647785	0.343764	0.387753	0.403183	0.758499	0.737388	0.685831	0.998163	0.649847	0.522665	0.34387	0.744638	0.482983
GSM1523777	0.521678	0.314785	0.332898	0.315288	0.275159	0.68387	0.330497	0.984313	0.534589	0.315551	0.236552	0.546756	0.385779
GSM1523778	0.55447	0.321889	0.438947	0.358657	0.54385	0.749009	0.578628	0.989139	0.747448	0.444697	0.262552	0.840819	0.66051
GSM1523779	0.649966	0.325631	0.390185	0.366318	0.739398	0.824078	0.650388	0.995423	0.696434	0.555715	0.285858	0.847593	0.497078
GSM1523780	0.458242	0.481963	0.403557	0.402875	0.624222	0.736381	0.634391	0.995582	0.745977	0.447482	0.267156	0.878512	0.524294
GSM1523781	0.509563	0.216676	0.313114	0.232321	0.263244	0.554703	0.259225	0.925399	0.499724	0.339847	0.165344	0.44508	0.493265
GSM1523782	0.487424	0.444933	0.400863	0.369042	0.363492	0.803505	0.459761	0.994916	0.701267	0.38306	0.165926	0.704267	0.449259
GSM1523783	0.721633	0.354603	0.423787	0.414421	0.576716	0.848288	0.489359	0.980533	0.673265	0.567281	0.321197	0.710215	0.580687
GSM1523784	0.670759	0.293592	0.398986	0.36572	0.569124	0.792338	0.420494	0.98242	0.622432	0.457247	0.296908	0.678867	0.664968
GSM1523785	0.619312	0.419764	0.413084	0.398452	0.685391	0.822354	0.630093	0.997392	0.738795	0.523537	0.25303	0.879201	0.509487
GSM1523786	0.648541	0.35525	0.423284	0.400882	0.69463	0.86482	0.621232	0.989536	0.699844	0.54189	0.36384	0.772992	0.580549
GSM1523787	0.507331	0.338446	0.349363	0.288584	0.432045	0.717547	0.413224	0.984302	0.617958	0.294416	0.176031	0.547564	0.511763
GSM1523788	0.575115	0.338662	0.440911	0.384174	0.606433	0.791797	0.587343	0.983208	0.683196	0.471896	0.322966	0.701456	0.70561
GSM1523789	0.599142	0.369108	0.374414	0.352392	0.484134	0.749505	0.446754	0.983913	0.701569	0.448797	0.189709	0.809135	0.534445
GSM1523790	0.665753	0.502871	0.45868	0.457192	0.821807	0.804771	0.684207	0.998696	0.750239	0.557861	0.377013	0.917494	0.490596
GSM1523791	0.684509	0.452746	0.440056	0.445386	0.753767	0.825537	0.703164	0.997098	0.738088	0.648449	0.300326	0.869148	0.494658
GSM1523792	0.486837	0.28685	0.352991	0.314644	0.608339	0.739893	0.529695	0.990009	0.636409	0.368852	0.282654	0.639397	0.445269
GSM1523793	0.548351	0.263743	0.376842	0.339314	0.803459	0.785713	0.650028	0.991521	0.639542	0.488432	0.303603	0.755214	0.470873
GSM1523794	0.409199	0.43752	0.462492	0.428611	0.94541	0.844448	0.709658	0.994651	0.725579	0.594307	0.356719	0.759804	0.468738
GSM1523795	0.330569	0.399893	0.395195	0.351556	0.505729	0.723047	0.470966	0.991073	0.680668	0.395629	0.30648	0.585278	0.511944
GSM1523796	0.612374	0.390569	0.449605	0.41719	0.635805	0.802753	0.563205	0.98399	0.689189	0.494855	0.316501	0.731513	0.799246
GSM1523797	0.588649	0.272046	0.359661	0.306456	0.60549	0.740568	0.514845	0.981582	0.662936	0.440524	0.205061	0.791933	0.518216
GSM1523798	0.682674	0.47636	0.509569	0.561226	0.913151	0.908146	0.78798	0.996036	0.729846	0.824151	0.606815	0.791809	0.671371
GSM1523799	0.603485	0.34705	0.419588	0.38526	0.534161	0.746929	0.550537	0.975464	0.705955	0.508342	0.30286	0.745913	0.460789
GSM1523800	0.59043	0.393949	0.419343	0.429099	0.768412	0.854664	0.690247	0.996992	0.697233	0.598237	0.354791	0.870684	0.340137
GSM1523801	0.608306	0.362913	0.400408	0.39005	0.774233	0.812465	0.678756	0.997232	0.639809	0.474826	0.332659	0.602142	0.521656
GSM1523802	0.59136	0.371559	0.395431	0.369527	0.455207	0.873828	0.517727	0.990357	0.707892	0.478207	0.249849	0.846911	0.530937
GSM1523803	0.488018	0.295672	0.374317	0.325735	0.573556	0.753312	0.553611	0.985746	0.60968	0.412511	0.245384	0.60869	0.504019
GSM1523804	0.643363	0.324249	0.422081	0.370983	0.583092	0.805719	0.533016	0.984729	0.666462	0.476855	0.312023	0.695972	0.615168
GSM1523805	0.578517	0.438315	0.449138	0.41538	0.804812	0.837554	0.689703	0.994921	0.754716	0.525501	0.367337	0.863202	0.519848
GSM1523806	0.562735	0.301039	0.40289	0.328938	0.634135	0.783769	0.554892	0.984241	0.696723	0.450061	0.254104	0.744737	0.537962
GSM1523807	0.521413	0.395811	0.443417	0.38786	0.542601	0.77543	0.55973	0.994656	0.756287	0.467441	0.32633	0.859239	0.563171
GSM1523808	0.606758	0.369523	0.44903	0.40186	0.632588	0.802696	0.58429	0.99434	0.724284	0.488756	0.367298	0.758846	0.578204
GSM1523809	0.55068	0.327291	0.379027	0.348676	0.662527	0.826663	0.651122	0.994148	0.654553	0.474571	0.285105	0.720802	0.532039
GSM1523810	0.580354	0.505909	0.468039	0.49705	0.887417	0.887088	0.739076	0.999121	0.737905	0.638439	0.443318	0.772834	0.499905
GSM1523811	0.605951	0.339784	0.435426	0.384815	0.817734	0.835757	0.70037	0.996009	0.748192	0.539379	0.336581	0.843901	0.545672
GSM1523812	0.66815	0.402005	0.457494	0.450937	0.818863	0.849096	0.742188	0.99827	0.733648	0.631352	0.380195	0.778831	0.622477
GSM1523813	0.436928	0.35843	0.375599	0.320638	0.481497	0.67654	0.463517	0.976547	0.635173	0.37489	0.170573	0.602473	0.511354
GSM1523814	0.505266	0.315875	0.380631	0.349867	0.450609	0.720195	0.530581	0.972151	0.64387	0.457496	0.285508	0.707965	0.458076
GSM1523815	0.261715	0.267015	0.325934	0.323372	0.606797	0.776837	0.589873	0.98366	0.567512	0.416866	0.294685	0.658697	0.494666
GSM1523816	0.434448	0.378015	0.371982	0.315703	0.510737	0.766948	0.44746	0.987647	0.597132	0.343486	0.23477	0.504152	0.475108
GSM1523817	0.293277	0.246424	0.306214	0.247554	0.386426	0.651974	0.353853	0.963301	0.443268	0.326463	0.153698	0.468268	0.329543
GSM1523818	0.653216	0.333349	0.371619	0.336158	0.593081	0.791523	0.525276	0.989133	0.659385	0.458456	0.256402	0.706972	0.477679
GSM1523819	0.46684	0.295287	0.332609	0.281761	0.286243	0.687195	0.311443	0.950879	0.5521	0.360995	0.156234	0.499536	0.473689
GSM1523820	0.331091	0.367653	0.403038	0.325659	0.642184	0.750691	0.449482	0.985894	0.694976	0.38477	0.253756	0.829426	0.465209
GSM1523821	0.609969	0.354229	0.406706	0.351939	0.647935	0.82119	0.644894	0.994916	0.675156	0.45019	0.278	0.696177	0.480798
GSM1523822	0.591207	0.463655	0.442962	0.427556	0.718164	0.838072	0.632669	0.996196	0.755773	0.563083	0.351727	0.836787	0.583524
GSM1523823	0.611698	0.448391	0.445879	0.417429	0.770676	0.796874	0.717525	0.997498	0.711927	0.528376	0.376313	0.879686	0.497223
GSM1523824	0.562066	0.348146	0.409283	0.357977	0.630831	0.776573	0.658591	0.995266	0.66637	0.405593	0.34215	0.602355	0.434944
GSM1523825	0.445409	0.331132	0.314559	0.255247	0.148384	0.650356	0.308957	0.990396	0.639208	0.319967	0.128575	0.773634	0.459296
GSM1523826	0.583345	0.360155	0.430506	0.37708	0.673803	0.766647	0.638739	0.992318	0.683098	0.4896	0.339565	0.768378	0.539255
GSM1523827	0.68077	0.344172	0.441474	0.445152	0.733449	0.862392	0.648906	0.992694	0.707736	0.667059	0.414149	0.799145	0.603973
GSM1523828	0.493236	0.396508	0.423601	0.361322	0.444939	0.748496	0.506667	0.972293	0.661837	0.428773	0.274171	0.590731	0.540028
GSM1523829	0.534352	0.277889	0.352761	0.304461	0.49709	0.733747	0.56833	0.984298	0.691249	0.41658	0.18606	0.823818	0.520124
GSM1523830	0.644423	0.41035	0.403469	0.401728	0.710498	0.794968	0.632005	0.994355	0.664721	0.550864	0.372441	0.731123	0.476624
GSM1523831	0.376702	0.275876	0.346638	0.292791	0.389802	0.66785	0.460019	0.982783	0.623213	0.352128	0.172911	0.625229	0.478587
GSM1523832	0.491563	0.345633	0.392126	0.33559	0.62291	0.801064	0.570735	0.989328	0.654524	0.431245	0.28643	0.737792	0.531697
GSM1523833	0.5142	0.346516	0.375744	0.339759	0.556911	0.722312	0.40858	0.989721	0.645605	0.402777	0.217983	0.658826	0.536171
GSM1523834	0.66088	0.431025	0.471732	0.461449	0.715634	0.820859	0.631791	0.990024	0.733017	0.586729	0.418167	0.849792	0.600208
GSM1523835	0.325569	0.303313	0.38073	0.342129	0.228905	0.755622	0.436543	0.983813	0.620705	0.327841	0.28462	0.576088	0.483635
GSM1523836	0.524551	0.487996	0.462317	0.390546	0.510535	0.763602	0.579621	0.991021	0.698158	0.451185	0.378032	0.726205	0.609133
GSM1523837	0.515113	0.306457	0.331932	0.294285	0.339069	0.66457	0.374885	0.963198	0.526249	0.339305	0.200136	0.421242	0.502917
GSM1523838	0.461215	0.512529	0.454718	0.43681	0.792283	0.928623	0.689668	0.99867	0.716391	0.502864	0.398276	0.774987	0.503287
GSM1523839	0.599539	0.331018	0.45125	0.380238	0.385542	0.756932	0.39839	0.979841	0.701533	0.470702	0.242519	0.73205	0.625544
GSM1523840	0.369267	0.282924	0.370428	0.274826	0.719782	0.697725	0.534441	0.982154	0.598043	0.307304	0.202804	0.592337	0.481286
GSM1523841	0.53134	0.400986	0.406937	0.37428	0.448361	0.786852	0.503809	0.990697	0.705792	0.470857	0.279526	0.744984	0.545388
GSM1523842	0.526533	0.317437	0.396636	0.37895	0.675241	0.76036	0.599019	0.992585	0.679152	0.482809	0.376065	0.831764	0.578363
GSM1523843	0.573329	0.384024	0.41473	0.392852	0.508977	0.782254	0.540281	0.988656	0.671439	0.459739	0.323669	0.715877	0.67101
GSM1523844	0.399012	0.295787	0.370996	0.304945	0.211173	0.68781	0.366218	0.976316	0.627747	0.310514	0.177679	0.649349	0.465694
GSM1523845	0.515464	0.453406	0.447959	0.453034	0.553645	0.857686	0.609849	0.99447	0.73254	0.547417	0.365783	0.76938	0.439106
GSM1523846	0.630819	0.38164	0.422676	0.427881	0.739311	0.857331	0.653581	0.996141	0.685502	0.552027	0.371722	0.733845	0.594557
GSM1523847	0.594771	0.341871	0.399059	0.360151	0.61768	0.761362	0.629917	0.992081	0.706918	0.447973	0.283962	0.779686	0.497932
GSM1523848	0.648373	0.513574	0.494379	0.570552	0.936815	0.902112	0.822809	0.998057	0.71206	0.767408	0.553386	0.782299	0.609171
GSM1523849	0.490943	0.315645	0.425371	0.372798	0.637514	0.7374	0.607466	0.99492	0.724537	0.467873	0.301158	0.870017	0.561817
GSM1523850	0.626468	0.318123	0.387402	0.340741	0.651963	0.804183	0.494449	0.988084	0.643071	0.442182	0.262702	0.790038	0.627699
GSM1523851	0.548071	0.450574	0.432335	0.379214	0.654823	0.825319	0.64719	0.996432	0.757146	0.447724	0.303591	0.845288	0.505732
GSM1523852	0.672924	0.312521	0.42614	0.385568	0.729268	0.822372	0.651876	0.990194	0.695344	0.541321	0.321874	0.770406	0.561805
GSM1523853	0.519788	0.276132	0.3934	0.300884	0.581815	0.73103	0.510666	0.986411	0.634887	0.392739	0.240396	0.651259	0.483313
GSM1523854	0.598095	0.38479	0.443494	0.398821	0.765295	0.820993	0.701522	0.994626	0.73559	0.49697	0.342949	0.806299	0.54805
GSM1523855	0.504581	0.320103	0.355475	0.277361	0.483653	0.64412	0.420812	0.953629	0.541761	0.314836	0.14451	0.516637	0.504837
GSM1523856	0.309308	0.36201	0.401452	0.351458	0.646257	0.671999	0.635674	0.964995	0.633625	0.410562	0.29474	0.63411	0.499891
GSM1523857	0.511004	0.328283	0.377937	0.325183	0.443169	0.754916	0.465949	0.985511	0.644255	0.356559	0.213899	0.77839	0.595593
GSM1523858	0.483854	0.240156	0.355067	0.281154	0.433501	0.698128	0.409177	0.941566	0.549279	0.390141	0.181394	0.668827	0.689609
GSM1523859	0.628028	0.354931	0.409938	0.339693	0.409105	0.763408	0.492246	0.984347	0.69182	0.400713	0.206927	0.710939	0.496321
GSM1523860	0.631843	0.39694	0.43889	0.394872	0.67847	0.821386	0.672956	0.996939	0.722685	0.490415	0.331056	0.774144	0.468081
GSM1523861	0.598741	0.270275	0.41535	0.343891	0.812486	0.769838	0.640501	0.994173	0.710808	0.46908	0.250537	0.822909	0.602052
GSM1523862	0.505686	0.337832	0.394385	0.352245	0.607218	0.822599	0.585836	0.971462	0.63334	0.484306	0.314119	0.70829	0.665153
GSM1523863	0.587455	0.515084	0.435081	0.47313	0.859789	0.880317	0.761669	0.998589	0.743522	0.612128	0.414781	0.814168	0.488032
GSM1523864	0.613213	0.412683	0.392489	0.340767	0.541952	0.81806	0.497251	0.992291	0.617598	0.382614	0.228499	0.610714	0.482609
GSM1523865	0.474094	0.322432	0.353296	0.309954	0.469305	0.751369	0.474911	0.988285	0.584335	0.380008	0.184573	0.506356	0.504874
GSM1523866	0.597948	0.37894	0.451346	0.403355	0.74292	0.81246	0.673634	0.988721	0.696912	0.496044	0.324044	0.772589	0.679325
GSM1523867	0.610383	0.327415	0.40103	0.345883	0.641231	0.723884	0.54565	0.99274	0.700564	0.454682	0.283622	0.803477	0.571719
GSM1523868	0.64215	0.459161	0.458297	0.47384	0.826242	0.833921	0.675183	0.997897	0.796735	0.618298	0.382582	0.905756	0.533867
GSM1523869	0.584045	0.429494	0.399894	0.375689	0.568435	0.802396	0.521778	0.986815	0.697752	0.45506	0.239544	0.766296	0.50958
GSM1523870	0.538443	0.34708	0.38218	0.343119	0.710404	0.881977	0.687495	0.997231	0.68645	0.488755	0.269132	0.794661	0.460215
GSM1523871	0.643767	0.330116	0.391094	0.35326	0.60687	0.780634	0.535506	0.991228	0.703144	0.474893	0.27507	0.875814	0.527142
GSM1523872	0.658486	0.49654	0.447214	0.453397	0.605837	0.81641	0.563811	0.991449	0.700629	0.502118	0.364649	0.695296	0.519889
GSM1523873	0.71049	0.43075	0.487728	0.476097	0.853669	0.883758	0.787358	0.994465	0.761853	0.67333	0.429737	0.802351	0.51491
GSM1523874	0.5557	0.43356	0.434407	0.380208	0.440732	0.77314	0.553539	0.986511	0.719696	0.416465	0.29789	0.762098	0.490325
GSM1523875	0.185974	0.304852	0.345776	0.254805	0.309038	0.696756	0.429633	0.985112	0.586564	0.304881	0.165129	0.647692	0.450255
GSM1523876	0.563485	0.468465	0.403377	0.376019	0.664452	0.806098	0.58199	0.996753	0.706573	0.475001	0.271413	0.758901	0.511417
GSM1523877	0.498232	0.280321	0.325998	0.250004	0.161567	0.628062	0.197088	0.959263	0.529349	0.309299	0.12716	0.599453	0.452745
GSM1523878	0.656438	0.468676	0.438992	0.453219	0.748838	0.871825	0.678983	0.995929	0.742008	0.579157	0.378315	0.826294	0.547812
GSM1523879	0.587623	0.304823	0.362406	0.33125	0.588134	0.739131	0.481015	0.991025	0.64996	0.409597	0.288574	0.674388	0.530354
GSM1523880	0.583575	0.365196	0.41288	0.392063	0.715008	0.841933	0.691204	0.995741	0.680207	0.544115	0.347351	0.732249	0.525749
GSM1523881	0.476524	0.323627	0.371882	0.289499	0.397805	0.689143	0.374694	0.980576	0.608239	0.316874	0.175037	0.603192	0.516191
GSM1523882	0.565655	0.38359	0.393157	0.374783	0.605853	0.812537	0.59755	0.993639	0.725842	0.475655	0.332718	0.755697	0.493723
GSM1523883	0.526188	0.401458	0.405182	0.374647	0.70703	0.847439	0.623961	0.995848	0.699437	0.473586	0.310094	0.741155	0.492505
GSM1523884	0.607871	0.302462	0.425054	0.354346	0.519241	0.787054	0.532156	0.98643	0.687028	0.455736	0.267408	0.669602	0.680068
GSM1523885	0.597515	0.481696	0.420488	0.403757	0.76109	0.834714	0.677567	0.996565	0.757872	0.537215	0.329602	0.864122	0.465098
GSM1523886	0.616928	0.499138	0.504457	0.449573	0.753913	0.807981	0.700809	0.992906	0.734623	0.489503	0.403277	0.796834	0.640818
GSM1523887	0.532219	0.45356	0.46448	0.436774	0.760098	0.876668	0.656173	0.993744	0.662155	0.519975	0.405445	0.599205	0.489262
GSM1523888	0.611013	0.435054	0.432456	0.456533	0.899813	0.867995	0.76987	0.99779	0.71364	0.657622	0.458532	0.76797	0.502692
GSM1523889	0.611292	0.243631	0.340458	0.258803	0.402598	0.771525	0.366224	0.985151	0.56305	0.328887	0.140011	0.622521	0.496887
GSM1523890	0.708798	0.319696	0.388591	0.351485	0.52096	0.809048	0.426366	0.980736	0.627489	0.490606	0.250966	0.66929	0.537235
GSM1523891	0.518561	0.388364	0.458186	0.374315	0.354789	0.741281	0.41703	0.989481	0.737293	0.475165	0.194938	0.859697	0.661321
GSM1523892	0.592456	0.40904	0.428975	0.40065	0.693952	0.847052	0.627333	0.992976	0.70338	0.471838	0.385309	0.770418	0.560088
GSM1523893	0.618855	0.321046	0.361438	0.309086	0.43859	0.700043	0.438719	0.981143	0.612734	0.369084	0.229216	0.641883	0.477445
GSM1523894	0.485158	0.380278	0.387455	0.300148	0.46827	0.706509	0.460867	0.982335	0.6466	0.347715	0.162784	0.63221	0.462855
GSM1523895	0.358324	0.365805	0.383385	0.316818	0.55034	0.820688	0.600946	0.993081	0.645349	0.392696	0.263464	0.629895	0.449275
GSM1523896	0.593261	0.46307	0.441933	0.437776	0.727613	0.87661	0.67586	0.996619	0.709035	0.586681	0.403732	0.761713	0.571719
GSM1523897	0.224995	0.399557	0.365741	0.310555	0.34728	0.816791	0.337983	0.983315	0.640649	0.370043	0.152321	0.664415	0.478918
GSM1523898	0.509613	0.297995	0.376602	0.279137	0.537622	0.659083	0.450364	0.98199	0.598189	0.35332	0.212322	0.450019	0.505058
GSM1523899	0.647885	0.363791	0.377008	0.390631	0.758958	0.787319	0.568585	0.988186	0.667452	0.530233	0.249114	0.774465	0.485924
GSM1523901	0.614091	0.433089	0.432282	0.401612	0.726645	0.863604	0.675018	0.995074	0.72071	0.521403	0.269904	0.737352	0.518839
GSM1523903	0.482773	0.301624	0.369469	0.285527	0.355368	0.698851	0.381591	0.991623	0.586726	0.349405	0.134895	0.492597	0.522815
GSM1523904	0.579112	0.279434	0.395006	0.348356	0.686077	0.798773	0.599045	0.986526	0.705154	0.489526	0.213673	0.799161	0.581122
GSM1523905	0.683716	0.300592	0.39051	0.32614	0.428387	0.774308	0.460692	0.988145	0.66985	0.399025	0.185093	0.693011	0.656272
GSM1523906	0.649486	0.533123	0.476717	0.524049	0.87111	0.89594	0.757399	0.996487	0.761524	0.641222	0.497451	0.831874	0.600564
GSM1523908	0.541809	0.442789	0.453285	0.454715	0.790377	0.821349	0.69599	0.997497	0.766592	0.562826	0.366348	0.91257	0.502028
GSM1523909	0.375353	0.416849	0.444379	0.432244	0.898017	0.786803	0.756853	0.995582	0.754562	0.611188	0.33259	0.795564	0.505937
GSM1523910	0.543212	0.448556	0.426236	0.425212	0.796759	0.801579	0.674783	0.997337	0.716708	0.493607	0.374636	0.896961	0.480245
GSM1523911	0.581184	0.38348	0.403246	0.353585	0.655574	0.850657	0.56628	0.995264	0.698579	0.485022	0.24172	0.790977	0.492701
GSM1523918	0.418412	0.332912	0.359686	0.31229	0.490922	0.757578	0.488768	0.984639	0.63166	0.372439	0.183788	0.635949	0.612486
GSM1523919	0.6492	0.334558	0.409067	0.394283	0.715894	0.805292	0.598483	0.996834	0.693786	0.51368	0.369986	0.770307	0.62859
GSM1523920	0.677876	0.288973	0.388454	0.342512	0.67472	0.796401	0.556017	0.988207	0.697146	0.51166	0.243116	0.858344	0.639787
GSM1523921	0.55411	0.402338	0.390417	0.368269	0.639323	0.801496	0.63846	0.991137	0.661011	0.422259	0.289212	0.709517	0.425549
GSM1523922	0.504957	0.419744	0.41848	0.335191	0.470157	0.747305	0.497301	0.992688	0.725502	0.372442	0.246934	0.842646	0.521642
GSM1523923	0.655601	0.329514	0.384264	0.342926	0.613354	0.751327	0.45457	0.987743	0.703823	0.408709	0.210313	0.792914	0.508913
GSM1523924	0.683376	0.294358	0.37971	0.341492	0.69352	0.809452	0.547735	0.985291	0.685244	0.43558	0.261486	0.820235	0.556342
GSM1523925	0.463201	0.364822	0.371507	0.368018	0.424162	0.719945	0.539513	0.971525	0.637668	0.425779	0.38403	0.670304	0.489477
GSM1523926	0.627817	0.23907	0.312968	0.28704	0.250018	0.88518	0.309854	0.989542	0.604938	0.386881	0.15068	0.715799	0.470274
GSM1523927	0.626283	0.340648	0.398866	0.364884	0.296766	0.75	0.321267	0.980981	0.601064	0.396611	0.32923	0.557675	0.578433
GSM1523928	0.453586	0.268195	0.393421	0.29428	0.379715	0.649873	0.451579	0.992897	0.629522	0.371089	0.180945	0.485409	0.506901
GSM1523929	0.585792	0.440274	0.433151	0.426109	0.744613	0.802811	0.663907	0.99529	0.694148	0.579733	0.339037	0.720923	0.525795
GSM1523930	0.61865	0.328404	0.434663	0.343306	0.436902	0.716088	0.517873	0.98799	0.6337	0.39907	0.253487	0.604141	0.534039
GSM1523931	0.635688	0.457147	0.469174	0.489033	0.885227	0.876538	0.789656	0.998403	0.719692	0.717916	0.473556	0.731726	0.605998
GSM1523932	0.538447	0.299792	0.365173	0.296654	0.437969	0.716729	0.504154	0.99072	0.709753	0.388738	0.216785	0.825497	0.504794
GSM1523933	0.40174	0.342455	0.442494	0.356564	0.539731	0.692282	0.545597	0.97622	0.698291	0.425273	0.278982	0.769501	0.499918
GSM1523934	0.579819	0.316056	0.354299	0.324847	0.273963	0.684687	0.417967	0.978947	0.643366	0.36508	0.200155	0.649604	0.487097
GSM1523935	0.523281	0.386095	0.477946	0.403673	0.451452	0.785584	0.500805	0.985188	0.67872	0.478853	0.319425	0.654006	0.677044
GSM1523936	0.615774	0.336944	0.407165	0.358961	0.53232	0.814749	0.474938	0.980371	0.637144	0.440351	0.258265	0.621877	0.601312
GSM1523937	0.709847	0.349664	0.406828	0.380226	0.717248	0.82657	0.558165	0.996888	0.719196	0.524111	0.27776	0.818283	0.572303
GSM1523938	0.477645	0.336913	0.385892	0.339856	0.553598	0.743969	0.503742	0.978922	0.631288	0.368481	0.253138	0.720057	0.709988
GSM1523939	0.645726	0.281465	0.40267	0.360222	0.576556	0.812767	0.508378	0.981741	0.620755	0.447942	0.284218	0.766962	0.803607
GSM1523940	0.568148	0.279236	0.339324	0.272975	0.339296	0.695189	0.396892	0.973116	0.578666	0.370149	0.169786	0.571746	0.566114
GSM1523941	0.365838	0.387819	0.437248	0.416149	0.891401	0.814098	0.738179	0.993087	0.683488	0.536101	0.400699	0.670631	0.518872
GSM1523942	0.608058	0.359074	0.397115	0.331365	0.353089	0.7567	0.421891	0.991258	0.643667	0.393088	0.22481	0.677931	0.569582
GSM1523943	0.592502	0.301202	0.394528	0.32272	0.562825	0.772998	0.548193	0.995715	0.730352	0.433466	0.210079	0.821955	0.49659
GSM1523944	0.57725	0.358366	0.445885	0.418731	0.831458	0.838459	0.740943	0.99686	0.671008	0.538658	0.415841	0.811819	0.512545
GSM1523945	0.465603	0.432754	0.469324	0.368233	0.505143	0.747469	0.478289	0.982382	0.658263	0.46342	0.215484	0.627738	0.67139
GSM1523946	0.421713	0.3668	0.419425	0.35246	0.52744	0.711916	0.488678	0.991553	0.684837	0.40475	0.316556	0.742199	0.501179
GSM1523947	0.632447	0.409285	0.394823	0.372753	0.673632	0.784391	0.604739	0.996008	0.645086	0.479201	0.278794	0.673743	0.503632
GSM1523948	0.625664	0.287109	0.366851	0.336112	0.493141	0.745882	0.425621	0.952111	0.592056	0.412318	0.194018	0.628256	0.560614
GSM1523949	0.666185	0.288372	0.405608	0.353515	0.547493	0.784063	0.553463	0.982197	0.667417	0.44388	0.27529	0.827905	0.667564
GSM1523950	0.571797	0.260249	0.324595	0.276316	0.448411	0.75788	0.446898	0.996486	0.62629	0.334832	0.211634	0.728984	0.455742
GSM1523951	0.641767	0.398431	0.450757	0.481429	0.85375	0.872349	0.769358	0.996381	0.712478	0.661453	0.485387	0.820537	0.526475
GSM1523952	0.65417	0.300668	0.424342	0.353195	0.728855	0.812193	0.614752	0.991317	0.700419	0.445672	0.353277	0.727694	0.636163
GSM1523953	0.443082	0.285979	0.305314	0.241304	0.205363	0.521649	0.314405	0.970197	0.517788	0.28091	0.16309	0.462245	0.523998
GSM1523954	0.699042	0.285481	0.317285	0.281501	0.606567	0.660473	0.396191	0.988013	0.615677	0.427954	0.120623	0.792415	0.503749
GSM1523955	0.622599	0.227471	0.351934	0.289078	0.636012	0.727245	0.430475	0.941515	0.521111	0.318699	0.256732	0.562214	0.668902
GSM1523956	0.415136	0.282973	0.37555	0.273705	0.520048	0.722596	0.538459	0.984273	0.64892	0.337478	0.179938	0.700473	0.476013
GSM1523957	0.634322	0.243349	0.32259	0.276713	0.231685	0.611431	0.349692	0.985383	0.56585	0.372293	0.158252	0.564991	0.530414
GSM1523958	0.671152	0.426213	0.460703	0.462892	0.834886	0.86949	0.713444	0.997126	0.745181	0.642456	0.395285	0.895125	0.566662
GSM1523959	0.511974	0.259625	0.329289	0.271816	0.273723	0.699955	0.266614	0.984894	0.556628	0.308531	0.181245	0.518791	0.503935
GSM1523960	0.388839	0.326276	0.309199	0.268644	0.14897	0.582005	0.28007	0.992053	0.623149	0.268747	0.144053	0.61062	0.492073
GSM1523961	0.428682	0.328097	0.360587	0.291007	0.489711	0.758806	0.581692	0.995979	0.651048	0.374683	0.212709	0.805058	0.503991
GSM1523962	0.541371	0.316312	0.399843	0.358409	0.554192	0.825431	0.491036	0.970959	0.614237	0.457261	0.297302	0.644819	0.690241
GSM1523963	0.679094	0.257673	0.371036	0.311013	0.576607	0.740423	0.449208	0.990308	0.668264	0.472656	0.215901	0.805476	0.580254
GSM1523964	0.544994	0.326038	0.356069	0.299768	0.485363	0.774191	0.493225	0.996383	0.648835	0.344335	0.186581	0.700921	0.514263
GSM1523965	0.518055	0.454581	0.498343	0.441149	0.546361	0.725556	0.550797	0.985449	0.73557	0.466204	0.404525	0.80129	0.596924
GSM1523966	0.480549	0.33685	0.383186	0.343898	0.521629	0.826714	0.590511	0.993161	0.699252	0.411339	0.261683	0.633574	0.499357
GSM1523967	0.650667	0.289201	0.410847	0.358707	0.742158	0.787808	0.646744	0.995586	0.693187	0.459534	0.343383	0.78362	0.545947
GSM1523968	0.577534	0.302885	0.365785	0.305119	0.473455	0.719403	0.395848	0.966437	0.639959	0.410937	0.205852	0.776225	0.593992
GSM1523969	0.647226	0.291268	0.361969	0.306142	0.508711	0.739434	0.440828	0.972989	0.589539	0.376982	0.259733	0.604833	0.527534
GSM1523970	0.395141	0.354547	0.326364	0.286793	0	0.539652	0.183315	0.895869	0.515729	0.305046	0.114354	0.447282	0.474072
GSM1523971	0.538823	0.336669	0.406755	0.369463	0.441425	0.789304	0.518557	0.970025	0.604072	0.419995	0.36439	0.597179	0.640065
GSM1523972	0.507777	0.403557	0.365822	0.380882	0.344533	0.833025	0.400631	0.985668	0.661218	0.413766	0.276894	0.707868	0.52958
GSM1523973	0.625512	0.286348	0.362101	0.303157	0.339752	0.746084	0.321122	0.981811	0.590102	0.435207	0.162545	0.54443	0.60399
GSM1523974	0.339418	0.292455	0.370324	0.275161	0.28849	0.697442	0.413527	0.987028	0.572607	0.280955	0.15929	0.528049	0.50021
GSM1523975	0.607158	0.557944	0.465085	0.516346	0.877208	0.872067	0.767837	0.995236	0.738726	0.660576	0.510171	0.902316	0.60247
GSM1523976	0.501908	0.279972	0.371308	0.311921	0.531664	0.784756	0.526898	0.991358	0.647579	0.370686	0.294165	0.788198	0.547757
GSM1523977	0.475888	0.292017	0.323697	0.254348	0.198485	0.631983	0.276227	0.946166	0.58372	0.266988	0.145206	0.532772	0.464693
GSM1523978	0.521441	0.404165	0.415425	0.349764	0.669033	0.77194	0.516383	0.992854	0.694966	0.408439	0.300281	0.662348	0.457848
GSM1523979	0.470324	0.415581	0.409336	0.378085	0.756332	0.787752	0.682764	0.997151	0.723215	0.413798	0.299273	0.805576	0.482746
GSM1523980	0.621477	0.423689	0.460282	0.436642	0.751991	0.866376	0.651306	0.989674	0.714015	0.510697	0.424056	0.695594	0.55657
GSM1523981	0.558115	0.395323	0.502426	0.429125	0.663758	0.758902	0.612369	0.98604	0.737417	0.51882	0.324873	0.810716	0.73891
GSM1523982	0.533758	0.477465	0.475676	0.457816	0.659226	0.806519	0.549234	0.98124	0.71656	0.540575	0.351702	0.710623	0.618812
GSM1523983	0.52091	0.379546	0.390619	0.346497	0.561672	0.729768	0.574529	0.991382	0.646794	0.361953	0.272001	0.704235	0.476358
GSM1523984	0.26076	0.25011	0.277737	0.217865	0.347839	0.529222	0.444777	0.919739	0.438584	0.242307	0.162715	0.401752	0.152163
GSM1523985	0.576083	0.393719	0.455247	0.431143	0.729207	0.772015	0.68089	0.995769	0.683589	0.5035	0.413185	0.712899	0.611694
GSM1523986	0.701568	0.356632	0.435292	0.422938	0.893695	0.887414	0.710527	0.994417	0.703479	0.6028	0.385047	0.76287	0.564871
GSM1523987	0.677241	0.291843	0.389802	0.374127	0.706349	0.801947	0.550681	0.984257	0.630813	0.490741	0.366982	0.683767	0.54917
GSM1523988	0.474747	0.336083	0.391637	0.372792	0.72949	0.750318	0.622235	0.986941	0.625576	0.456309	0.381414	0.784304	0.720653
GSM1523989	0.606105	0.339689	0.413135	0.376855	0.689412	0.808471	0.587551	0.992113	0.714392	0.469653	0.279796	0.806082	0.617317
GSM1523990	0.306806	0.26805	0.365399	0.330189	0.152535	0.717577	0.39293	0.977017	0.596802	0.352827	0.27468	0.614517	0.485983
GSM1523991	0.506461	0.443635	0.369757	0.330451	0.552547	0.718024	0.516503	0.985933	0.630338	0.385241	0.220847	0.653368	0.521748
GSM1523992	0.709343	0.292511	0.331874	0.303936	0.445001	0.759099	0.412167	0.990122	0.601964	0.425487	0.203945	0.651405	0.541997
GSM1523993	0.619235	0.368008	0.451371	0.408116	0.772141	0.853177	0.722073	0.996993	0.69479	0.473535	0.382744	0.746645	0.612341
GSM1523994	0.696703	0.276059	0.377394	0.346263	0.682898	0.801917	0.557911	0.989511	0.709629	0.450288	0.283777	0.840925	0.555734
GSM1523995	0.458479	0.234519	0.360085	0.290953	0.419771	0.786706	0.497351	0.984553	0.578609	0.323632	0.196826	0.608636	0.455616
GSM1523996	0.671976	0.275262	0.375079	0.314205	0.602622	0.769592	0.452044	0.986629	0.659779	0.397356	0.153444	0.771498	0.655632
GSM1523997	0.337689	0.272921	0.388753	0.273005	0.470299	0.702281	0.486092	0.989656	0.649247	0.352728	0.215897	0.631382	0.445348
GSM1523998	0.562904	0.318596	0.327052	0.299107	0.312051	0.867532	0.28734	0.981133	0.612692	0.34351	0.150733	0.613811	0.444658
GSM1523999	0.482156	0.305047	0.339746	0.294507	0.18515	0.698717	0.225214	0.978565	0.617802	0.320772	0.222308	0.666159	0.515142
GSM1524000	0.6304	0.317089	0.407324	0.355891	0.639016	0.825639	0.606635	0.991286	0.671163	0.457253	0.298304	0.689147	0.614309
GSM1524001	0.494835	0.275243	0.389339	0.30603	0.590224	0.735118	0.562437	0.991415	0.668687	0.375606	0.24117	0.798171	0.49884
GSM1524002	0.424263	0.495255	0.438837	0.490198	0.913748	0.853994	0.790924	0.99803	0.762733	0.610239	0.514832	0.840318	0.499313
GSM1524003	0.72294	0.301701	0.31986	0.31406	0.37109	0.788664	0.315796	0.985935	0.581859	0.404463	0.240573	0.598491	0.410128
GSM1524004	0.67649	0.264213	0.392883	0.338278	0.725988	0.820904	0.56931	0.993462	0.697414	0.445011	0.246849	0.745046	0.547085
GSM1524005	0.510402	0.289832	0.363266	0.304034	0.640025	0.734584	0.538209	0.983281	0.632506	0.352218	0.262318	0.67894	0.472446
GSM1524006	0.521672	0.44955	0.400124	0.413929	0.62156	0.778715	0.506906	0.97072	0.633041	0.473665	0.340995	0.734264	0.759349
GSM1524007	0.595745	0.288316	0.405829	0.341569	0.604071	0.718361	0.581936	0.986758	0.679252	0.459446	0.309302	0.693207	0.493271
GSM1524008	0.563264	0.373725	0.406304	0.355971	0.368824	0.733511	0.508202	0.994068	0.733619	0.430056	0.236609	0.869334	0.47292
GSM1524009	0.632935	0.315809	0.427221	0.355358	0.479423	0.744366	0.495621	0.987477	0.672845	0.431358	0.294355	0.622515	0.655961
GSM1524010	0.644708	0.294264	0.403622	0.376274	0.706691	0.805892	0.552668	0.979783	0.640208	0.50968	0.331409	0.712242	0.568776
GSM1524011	0.733546	0.267841	0.318233	0.300943	0.322087	0.71522	0.30379	0.972433	0.557345	0.388037	0.164414	0.644961	0.592248
GSM1524012	0.374466	0.309395	0.410134	0.355306	0.610811	0.733556	0.595379	0.985017	0.727045	0.426052	0.291704	0.681789	0.442156
GSM1524013	0.467267	0.29845	0.407256	0.334591	0.544959	0.819981	0.59638	0.993002	0.643419	0.380991	0.299979	0.739041	0.44202
GSM1524014	0.547669	0.345657	0.333413	0.341426	0.270232	0.60698	0.347969	0.987458	0.643451	0.407935	0.193264	0.835886	0.458725
GSM1524015	0.422001	0.208708	0.323218	0.260205	0.45682	0.680067	0.382588	0.981696	0.562045	0.287261	0.207327	0.643289	0.522179
GSM1524016	0.679198	0.365872	0.433447	0.423798	0.747372	0.804362	0.603226	0.992511	0.708667	0.521656	0.407148	0.850828	0.522232
GSM1524017	0.642116	0.342806	0.380908	0.353827	0.638568	0.803804	0.594544	0.995928	0.705861	0.436981	0.280242	0.830264	0.526727
GSM1524018	0.691584	0.290017	0.358978	0.32749	0.630575	0.76719	0.484198	0.985129	0.604156	0.484669	0.24514	0.641555	0.498532
GSM1524019	0.587784	0.307715	0.413359	0.370188	0.672176	0.801471	0.554733	0.987433	0.679372	0.436617	0.323159	0.742291	0.524786
GSM1524020	0.64763	0.286469	0.391144	0.355051	0.610969	0.756094	0.550824	0.988075	0.672024	0.436252	0.236013	0.747161	0.527638
GSM1524021	0.650007	0.340898	0.444453	0.396102	0.568717	0.799722	0.5606	0.992536	0.71416	0.467791	0.366684	0.795483	0.509668
GSM1524022	0.564503	0.396018	0.412068	0.402604	0.521847	0.813999	0.603922	0.994146	0.737178	0.478449	0.315694	0.86902	0.636044
GSM1524023	0.499092	0.263682	0.377464	0.322471	0.630678	0.743837	0.57329	0.994972	0.669157	0.383917	0.272565	0.656518	0.493999
GSM1524024	0.637153	0.328902	0.3936	0.322265	0.49591	0.732745	0.419049	0.986683	0.663474	0.4011	0.200217	0.732141	0.558727
GSM1524025	0.374274	0.411972	0.431976	0.395537	0.723211	0.762984	0.630082	0.995373	0.770281	0.521739	0.280766	0.876652	0.474698
GSM1524026	0.641933	0.342183	0.416244	0.379507	0.568694	0.84625	0.536844	0.988426	0.637605	0.431581	0.280817	0.738687	0.720648
GSM1524027	0.608828	0.300836	0.377199	0.303837	0.461148	0.824876	0.416995	0.993992	0.608768	0.396074	0.177256	0.596935	0.575617
GSM1524028	0.448877	0.255745	0.354446	0.309749	0.617567	0.743599	0.533132	0.986389	0.653559	0.376281	0.220157	0.716479	0.540715
GSM1524029	0.575796	0.233672	0.370442	0.315971	0.549241	0.823743	0.502709	0.974062	0.582496	0.376491	0.28902	0.65472	0.618175
GSM1524030	0.45978	0.286546	0.377476	0.317206	0.562998	0.7557	0.486632	0.949359	0.594525	0.378495	0.271315	0.738311	0.729426
GSM1524031	0.451424	0.342847	0.388167	0.334099	0.451684	0.702689	0.489566	0.989786	0.588397	0.369985	0.293747	0.475643	0.476574
GSM1524032	0.521723	0.542389	0.430981	0.395404	0.265436	0.720898	0.394399	0.990566	0.695821	0.392188	0.235445	0.709022	0.482151
GSM1524033	0.58583	0.415616	0.449523	0.464407	0.888441	0.867625	0.744666	0.997552	0.736071	0.563858	0.434619	0.813907	0.463176
GSM1524034	0.703311	0.312861	0.410261	0.38736	0.665402	0.809706	0.5729	0.985838	0.675325	0.525588	0.315033	0.765888	0.536465
GSM1524035	0.557359	0.354522	0.408163	0.390881	0.679989	0.831299	0.587039	0.985284	0.677466	0.479595	0.343523	0.761081	0.703271
GSM1524036	0.453707	0.341421	0.349327	0.309033	0.404687	0.670956	0.399891	0.978018	0.575812	0.369346	0.223387	0.519678	0.53054
GSM1524037	0.579444	0.342202	0.377582	0.347814	0.383368	0.798818	0.486478	0.984157	0.662093	0.447785	0.238876	0.686716	0.516529
GSM1524038	0.612197	0.580661	0.499721	0.496112	0.733321	0.755521	0.634496	0.993913	0.710862	0.503527	0.556876	0.748615	0.486649
GSM1524039	0.617189	0.455639	0.49696	0.440852	0.469156	0.762136	0.457965	0.983413	0.721199	0.481856	0.295819	0.655964	0.681827
GSM1524040	0.641691	0.339391	0.431301	0.382938	0.689238	0.807675	0.637358	0.990561	0.72523	0.534952	0.339895	0.845518	0.547875
GSM1524041	0.582473	0.359705	0.42618	0.377834	0.520855	0.775913	0.557682	0.995079	0.741297	0.428962	0.287021	0.841593	0.464701
GSM1524042	0.430545	0.377542	0.481219	0.402308	0.700556	0.783574	0.699644	0.98914	0.693502	0.446292	0.370075	0.727431	0.530089
GSM1524043	0.601357	0.475759	0.466716	0.510401	0.897468	0.912026	0.756468	0.998642	0.716354	0.673739	0.490731	0.79445	0.444741
GSM1524044	0.543611	0.337882	0.423244	0.345381	0.609291	0.741998	0.586396	0.990363	0.64658	0.40087	0.301857	0.602152	0.550457
GSM1524045	0.57441	0.385934	0.354001	0.322918	0.352199	0.705572	0.441807	0.974419	0.607024	0.317131	0.219819	0.647401	0.531645
GSM1524046	0.631578	0.254128	0.400744	0.342007	0.553845	0.795004	0.558422	0.987922	0.629011	0.466438	0.281574	0.608855	0.696728
GSM1524047	0.730189	0.286783	0.3725	0.341394	0.42318	0.823149	0.424336	0.987143	0.611763	0.447073	0.275019	0.584514	0.493744
GSM1524048	0.557319	0.390983	0.386967	0.374682	0.684635	0.75563	0.578154	0.973843	0.616888	0.475318	0.290071	0.630189	0.481638
GSM1524049	0.526522	0.398744	0.410648	0.372398	0.573461	0.787702	0.63655	0.994545	0.730188	0.460395	0.255118	0.856606	0.514697
GSM1524050	0.669137	0.277059	0.331209	0.280186	0.455716	0.664427	0.354624	0.990725	0.621209	0.398572	0.112501	0.707375	0.562296
GSM1524051	0.68275	0.405732	0.439887	0.427159	0.78317	0.816748	0.666284	0.997073	0.780092	0.575213	0.392643	0.909493	0.492564
GSM1524052	0.488853	0.274717	0.333408	0.284949	0.30374	0.739416	0.310217	0.957256	0.582304	0.352083	0.126925	0.60908	0.594788
GSM1524053	0.609772	0.461354	0.398221	0.39655	0.48119	0.79744	0.525047	0.993747	0.665412	0.459648	0.327039	0.777297	0.49842
GSM1524054	0.540168	0.332117	0.375277	0.31702	0.577749	0.747768	0.554278	0.993721	0.662574	0.431664	0.229094	0.801487	0.491334
GSM1524055	0.579786	0.348597	0.430413	0.351591	0.28868	0.687974	0.464645	0.986148	0.717698	0.40217	0.247825	0.724682	0.54681
GSM1524056	0.589952	0.358234	0.416025	0.354468	0.538042	0.877531	0.535241	0.992366	0.674579	0.443809	0.272236	0.711259	0.48856
GSM1524057	0.536221	0.291645	0.363237	0.298567	0.524614	0.750268	0.442252	0.966474	0.593571	0.367439	0.183326	0.667511	0.682256
GSM1524058	0.648276	0.465701	0.533688	0.522985	0.838256	0.855032	0.771919	0.997791	0.743983	0.605319	0.526444	0.771732	0.750083
GSM1524059	0.587881	0.485622	0.499007	0.453886	0.497816	0.832717	0.539053	0.979459	0.690603	0.490234	0.463714	0.674148	0.74406
GSM1524060	0.477058	0.304837	0.403037	0.341397	0.345409	0.654687	0.414448	0.97539	0.602528	0.387163	0.245663	0.590683	0.471957
GSM1524061	0.57585	0.443181	0.335223	0.328354	0.437752	0.797042	0.45389	0.989541	0.645965	0.365596	0.211806	0.628289	0.393329
GSM1524062	0.538693	0.271319	0.373402	0.323842	0.602933	0.762502	0.471068	0.942595	0.56441	0.43016	0.288674	0.645384	0.601243
GSM1524068	0.570943	0.372713	0.374682	0.340132	0.638265	0.748787	0.609399	0.994148	0.631488	0.440786	0.242378	0.572144	0.47561
GSM1524069	0.718296	0.295107	0.337639	0.287462	0.503153	0.712299	0.442891	0.992954	0.642647	0.405839	0.162496	0.804024	0.50273
GSM1524070	0.525842	0.277626	0.336522	0.285032	0.375741	0.733483	0.391526	0.977015	0.636324	0.339866	0.163773	0.60773	0.531134
GSM1524071	0.656441	0.3011	0.375273	0.334886	0.56352	0.715964	0.490476	0.988477	0.673802	0.455152	0.174322	0.785547	0.520715
GSM1524072	0.696481	0.275337	0.378095	0.345804	0.514453	0.778619	0.464737	0.9839	0.638014	0.476333	0.268829	0.704445	0.602579
GSM2235556	0.481765	0.36125	0.338978	0.321373	0.292572	0.660625	0.360045	0.973031	0.611857	0.411001	0.279989	0.663564	0.48175
GSM2235557	0.675445	0.406949	0.393881	0.387672	0.401615	0.795251	0.421036	0.985786	0.701608	0.445361	0.236363	0.744112	0.656908
GSM2235558	0.664857	0.360652	0.38173	0.400218	0.479773	0.801103	0.558144	0.988304	0.682343	0.500206	0.321481	0.750239	0.564314
GSM2235559	0.518648	0.391486	0.407117	0.383448	0.348622	0.789329	0.525345	0.990077	0.635166	0.451461	0.357861	0.633951	0.480957
GSM2235560	0.610044	0.394886	0.394671	0.387611	0.521051	0.843533	0.489468	0.987234	0.672571	0.470386	0.33575	0.703676	0.545073
GSM2235561	0.574894	0.320379	0.385853	0.37541	0.411341	0.783857	0.516976	0.981473	0.692483	0.447419	0.318933	0.719017	0.600433
GSM2235562	0.525344	0.377431	0.348915	0.331589	0.303108	0.644588	0.406291	0.987365	0.591625	0.372296	0.232754	0.564935	0.475648
GSM2235563	0.52854	0.343279	0.356226	0.349011	0.467157	0.69198	0.540481	0.990634	0.659347	0.454457	0.272794	0.663192	0.483785
GSM2235564	0.265803	0.303844	0.330849	0.249408	0.341503	0.582545	0.366649	0.975184	0.629823	0.260191	0.194976	0.681462	0.688878
GSM2235565	0.544608	0.332891	0.348217	0.316521	0.494666	0.744972	0.382029	0.979919	0.597443	0.414167	0.233633	0.65117	0.587271
GSM2235566	0.463697	0.344705	0.345727	0.349462	0.453027	0.702598	0.493027	0.991045	0.545851	0.452106	0.298713	0.672079	0.531612
GSM2235567	0.603321	0.372841	0.373495	0.371946	0.457874	0.702074	0.454999	0.982082	0.61471	0.442888	0.29469	0.617805	0.63123
GSM2235568	0.469687	0.374673	0.352369	0.319213	0.134183	0.665538	0.295833	0.97683	0.639029	0.374159	0.191359	0.728975	0.516636
GSM2235569	0.474129	0.285032	0.354382	0.302925	0.332563	0.609877	0.335324	0.978328	0.616062	0.360425	0.175969	0.572377	0.445187
GSM2235570	0.441597	0.317727	0.381142	0.340162	0.365729	0.731027	0.416262	0.981451	0.669587	0.399983	0.203561	0.666332	0.517979
GSM2235571	0.489804	0.356405	0.39768	0.358762	0.542079	0.730905	0.497012	0.987025	0.613758	0.382179	0.275103	0.601232	0.485132
GSM2235572	0.5652	0.445416	0.433229	0.459454	0.667549	0.83504	0.681026	0.99614	0.702757	0.529107	0.442874	0.782591	0.603883
GSM2235573	0.603653	0.395741	0.414941	0.430472	0.567164	0.815997	0.634889	0.991203	0.698797	0.498696	0.401437	0.784359	0.508664
GSM2235574	0.487899	0.332398	0.407025	0.330785	0.367161	0.661565	0.483359	0.979089	0.686383	0.389544	0.224727	0.635903	0.475688
GSM2235575	0.337442	0.302224	0.357555	0.29532	0.155203	0.609305	0.340352	0.980121	0.607382	0.329359	0.24813	0.620551	0.450446
GSM2235576	0.544562	0.406602	0.41355	0.405102	0.704416	0.856214	0.650245	0.994172	0.747075	0.524289	0.35471	0.75836	0.480357
GSM2235577	0.598052	0.349599	0.421207	0.369232	0.572754	0.780441	0.634666	0.986968	0.695995	0.454374	0.331694	0.686907	0.479238
GSM2235578	0.496819	0.35763	0.411484	0.392482	0.72053	0.77341	0.652293	0.9917	0.675667	0.481093	0.416779	0.607614	0.498537
GSM2235579	0.491448	0.380575	0.40151	0.427638	0.611322	0.846625	0.60769	0.990847	0.718449	0.534955	0.388943	0.870444	0.462476
GSM2235580	0.648617	0.388725	0.426136	0.427427	0.619118	0.839128	0.635989	0.99074	0.697528	0.581839	0.398434	0.775435	0.621427
GSM2235582	0.649258	0.470207	0.395215	0.393501	0.40316	0.786021	0.455243	0.99247	0.665741	0.428431	0.301934	0.643412	0.513972
GSM2235584	0.594167	0.287197	0.395944	0.306846	0.456964	0.71789	0.442139	0.990104	0.648707	0.399142	0.199455	0.653613	0.505055
GSM2235585	0.633158	0.447335	0.439742	0.427178	0.735691	0.842862	0.668496	0.992207	0.736953	0.496243	0.366367	0.736739	0.545535
GSM2235586	0.639799	0.433169	0.474745	0.499424	0.88028	0.894493	0.782761	0.993958	0.702486	0.670732	0.523081	0.810562	0.550582
GSM2235587	0.623521	0.364233	0.401894	0.363963	0.340343	0.798658	0.531522	0.989704	0.719285	0.502034	0.273241	0.735881	0.480166
GSM2235588	0.582919	0.278163	0.348048	0.287621	0.322247	0.738084	0.375388	0.965064	0.616278	0.410194	0.142979	0.639477	0.511551
GSM2235589	0.568948	0.417814	0.368011	0.357482	0.311935	0.618141	0.484898	0.984006	0.67716	0.39387	0.214886	0.757644	0.52786
GSM2235593	0.618917	0.341504	0.4065	0.378797	0.556404	0.722659	0.618984	0.991559	0.746311	0.422387	0.32683	0.843872	0.427267
GSM2235595	0.63063	0.363136	0.437015	0.427459	0.589973	0.827876	0.606853	0.991334	0.656974	0.513759	0.431655	0.706402	0.56462
GSM2235596	0.484559	0.267115	0.388438	0.314991	0.499998	0.774671	0.526687	0.987748	0.634027	0.424001	0.281981	0.793616	0.503586
GSM2235597	0.59229	0.31681	0.354397	0.335981	0.394689	0.652477	0.476958	0.976157	0.56573	0.389854	0.27167	0.526623	0.448562
GSM2235598	0.613609	0.407905	0.454182	0.450175	0.617277	0.857069	0.611758	0.990323	0.670383	0.561414	0.474414	0.710374	0.527547
GSM2235599	0.563769	0.343116	0.39321	0.363461	0.612977	0.794393	0.610487	0.994411	0.696173	0.488481	0.313874	0.728137	0.507855
GSM2235600	0.556091	0.403214	0.431174	0.393221	0.475287	0.720687	0.462446	0.984944	0.710558	0.451897	0.293647	0.695725	0.507846
GSM2235601	0.592631	0.292047	0.4023	0.350778	0.443647	0.777798	0.505075	0.971677	0.660636	0.429037	0.247286	0.671651	0.602577
GSM2235602	0.678428	0.423382	0.440674	0.459907	0.631438	0.842766	0.636759	0.991198	0.664808	0.559049	0.45696	0.685926	0.545441
GSM2235603	0.423706	0.356268	0.35268	0.33377	0.378049	0.694733	0.509183	0.989649	0.694856	0.407761	0.205708	0.670437	0.473872
GSM2235604	0.501415	0.367598	0.380212	0.382494	0.580336	0.731158	0.595928	0.992655	0.667197	0.444955	0.324832	0.724218	0.486941
GSM2235605	0.59029	0.342054	0.394333	0.357731	0.58728	0.805214	0.500042	0.989127	0.663828	0.447706	0.290344	0.727051	0.620408
GSM2235606	0.613533	0.376504	0.443206	0.419778	0.684635	0.839714	0.584754	0.984055	0.673787	0.529069	0.421775	0.700375	0.602039
GSM2235607	0.470093	0.354992	0.424525	0.341485	0.479629	0.739141	0.478318	0.99295	0.732102	0.426944	0.211173	0.708244	0.516187
GSM2235608	0.459446	0.38689	0.371885	0.30943	0.490455	0.684414	0.450888	0.991808	0.665192	0.345988	0.230429	0.750657	0.455142
GSM2235609	0.624814	0.388132	0.45045	0.431824	0.821752	0.864884	0.684814	0.993056	0.713628	0.54324	0.415846	0.789404	0.560828
GSM2235610	0.549713	0.43527	0.38782	0.379223	0.590926	0.793964	0.528372	0.976311	0.689583	0.456931	0.269779	0.755995	0.57233
GSM2235611	0.665599	0.285252	0.387677	0.328468	0.522198	0.786966	0.471025	0.978226	0.65278	0.429585	0.254269	0.722931	0.471141
GSM2235612	0.558645	0.328406	0.38734	0.337364	0.54745	0.793711	0.509964	0.988649	0.65472	0.479104	0.256805	0.761401	0.514073
GSM2235613	0.482848	0.284492	0.358736	0.281902	0.470075	0.600671	0.370037	0.955235	0.565853	0.313998	0.208805	0.544336	0.472557
GSM2235614	0.62663	0.401333	0.436055	0.432805	0.797563	0.844434	0.653435	0.995874	0.707227	0.556843	0.373794	0.744364	0.463976
GSM2235615	0.59115	0.371709	0.409352	0.334912	0.371693	0.702214	0.478438	0.988139	0.630879	0.39376	0.247458	0.621886	0.641221
GSM2235616	0.612051	0.334642	0.415697	0.378627	0.702372	0.862893	0.632819	0.997072	0.7101	0.472665	0.292601	0.812527	0.545816
GSM2235617	0.606401	0.313095	0.388845	0.324561	0.503823	0.755122	0.520462	0.986333	0.660867	0.419045	0.205842	0.619409	0.471187
GSM2235618	0.607228	0.320779	0.387063	0.333762	0.469311	0.697578	0.506196	0.991225	0.654868	0.411031	0.23687	0.620447	0.510155
GSM2235619	0.65796	0.338455	0.363233	0.325946	0.371347	0.747191	0.46223	0.983554	0.642267	0.431835	0.22394	0.765425	0.50229
GSM2235620	0.603486	0.283273	0.376542	0.332829	0.470019	0.759791	0.563482	0.989979	0.67558	0.452594	0.253058	0.777778	0.495923
GSM2235621	0.570104	0.321279	0.382604	0.319803	0.368563	0.702941	0.40586	0.984161	0.591025	0.417592	0.205939	0.649019	0.543946
GSM2235622	0.669677	0.359177	0.403912	0.402628	0.5676	0.783593	0.559886	0.983563	0.659256	0.471471	0.386434	0.723199	0.576788
GSM2235623	0.476289	0.319201	0.41633	0.359563	0.705702	0.787784	0.630249	0.991989	0.729052	0.507235	0.232999	0.809685	0.48611
GSM2235624	0.60344	0.305579	0.386163	0.343389	0.565918	0.735746	0.492511	0.992605	0.632396	0.407942	0.221411	0.583276	0.437006
GSM2235625	0.667676	0.287955	0.413172	0.353319	0.669905	0.794995	0.538047	0.978004	0.64543	0.458612	0.240863	0.673763	0.56098
GSM2235626	0.639204	0.395166	0.434999	0.407955	0.555996	0.814637	0.436519	0.986791	0.681105	0.515551	0.30919	0.699078	0.638102
GSM2235627	0.568594	0.290901	0.392785	0.330552	0.53684	0.777749	0.50837	0.995635	0.676264	0.433246	0.238175	0.795972	0.486309
GSM2235628	0.518139	0.361106	0.406341	0.353847	0.416406	0.780012	0.354274	0.976203	0.649639	0.410624	0.234563	0.67433	0.499147
GSM2235629	0.551876	0.361957	0.445655	0.38248	0.647157	0.778312	0.613714	0.98535	0.71376	0.505264	0.308531	0.744612	0.625489
GSM2235630	0.626413	0.3379	0.405599	0.37177	0.600976	0.814241	0.527712	0.987631	0.640609	0.495428	0.294053	0.728829	0.610149
GSM2235631	0.664684	0.359929	0.429869	0.422177	0.799677	0.842371	0.626601	0.992421	0.702066	0.586976	0.389566	0.748192	0.507918
GSM2235632	0.669256	0.403587	0.429174	0.452636	0.67954	0.812789	0.617732	0.99146	0.71544	0.541592	0.379935	0.678291	0.502923
GSM2235633	0.586476	0.332457	0.424267	0.386798	0.679149	0.823746	0.571808	0.980987	0.689876	0.485602	0.317662	0.754318	0.534557
GSM2235634	0.730618	0.309548	0.392026	0.355784	0.353409	0.768265	0.417601	0.98575	0.686731	0.433603	0.223822	0.752188	0.530607
GSM2235635	0.359982	0.309908	0.401276	0.389276	0.751523	0.773305	0.637629	0.983325	0.669516	0.462801	0.379059	0.635461	0.485845
GSM2235636	0.699834	0.312659	0.389305	0.366913	0.671183	0.815722	0.463525	0.985362	0.702004	0.460364	0.256197	0.836163	0.5508
GSM2235637	0.682105	0.360552	0.432091	0.433793	0.60201	0.84233	0.625444	0.997471	0.70253	0.569457	0.38616	0.782403	0.559476
GSM2235695	0.670155	0.339217	0.360866	0.330203	0.452069	0.805945	0.478747	0.995078	0.602043	0.441779	0.185101	0.666244	0.572105
GSM2235696	0.427859	0.333173	0.391954	0.414945	0.808565	0.83274	0.667157	0.997098	0.610822	0.529492	0.401465	0.733162	0.488599
GSM2235697	0.335714	0.337054	0.339486	0.267456	0.364339	0.609869	0.313955	0.967707	0.493232	0.360803	0.155227	0.586503	0.469759
GSM2235698	0.536043	0.309701	0.381022	0.323462	0.545491	0.714553	0.527001	0.983205	0.623817	0.474324	0.235051	0.685023	0.534901
GSM2235699	0.420051	0.355138	0.372703	0.326799	0.560099	0.720821	0.456015	0.985811	0.630737	0.384201	0.219394	0.662541	0.494421
GSM2235700	0.522174	0.350237	0.412798	0.362254	0.571731	0.76708	0.597636	0.994785	0.694668	0.462672	0.286368	0.770371	0.605934
GSM2235701	0.464194	0.313428	0.345051	0.279854	0.471087	0.628026	0.481407	0.99175	0.57338	0.352295	0.222766	0.538543	0.469722
GSM2235702	0.530552	0.343552	0.382274	0.349245	0.399504	0.784853	0.414668	0.987855	0.62436	0.428434	0.230951	0.689498	0.514513
GSM2235703	0.518356	0.326699	0.39444	0.330792	0.534927	0.791925	0.562943	0.98497	0.655669	0.445225	0.289859	0.721582	0.61609
GSM2235704	0.658715	0.280814	0.381605	0.334132	0.444467	0.767781	0.496862	0.977312	0.691672	0.440668	0.228674	0.808564	0.510638
GSM2235705	0.683128	0.289618	0.373932	0.32982	0.442206	0.740841	0.433649	0.982741	0.715001	0.446037	0.185754	0.8189	0.500739
GSM2235706	0.498924	0.294265	0.362253	0.262911	0.338492	0.653801	0.402354	0.965585	0.600642	0.366631	0.147062	0.611054	0.467133
GSM2235707	0.578671	0.30243	0.397375	0.312668	0.529977	0.770162	0.538673	0.987921	0.679441	0.430492	0.22514	0.725388	0.552761
GSM2235708	0.548498	0.380627	0.416475	0.357179	0.61564	0.807861	0.625583	0.991552	0.676852	0.423573	0.334779	0.729825	0.505082
GSM2235709	0.547539	0.353369	0.396599	0.354609	0.718906	0.728547	0.630815	0.993218	0.689156	0.468662	0.2854	0.730791	0.527905
GSM2235710	0.464039	0.375417	0.401922	0.347208	0.488354	0.790747	0.491021	0.973377	0.692271	0.415977	0.223867	0.766941	0.572205
GSM2235711	0.506599	0.385955	0.389211	0.371187	0.629216	0.746409	0.596647	0.989348	0.696556	0.476394	0.275309	0.706563	0.531137
GSM2235712	0.351482	0.306876	0.344552	0.234149	0.234195	0.645507	0.286296	0.993144	0.472659	0.25888	0.136745	0.456505	0.484798
GSM2235713	0.558759	0.328585	0.381159	0.312725	0.44704	0.744949	0.467548	0.981818	0.587702	0.398303	0.257581	0.680584	0.627451
GSM2235714	0.562341	0.355713	0.345014	0.278527	0.294493	0.602851	0.292425	0.980176	0.590426	0.355766	0.132429	0.638754	0.526928
GSM2235715	0.490466	0.428556	0.433846	0.4321	0.864955	0.885649	0.72001	0.996859	0.700937	0.609194	0.36337	0.743439	0.538917
GSM2235716	0.257582	0.26466	0.357749	0.262844	0.300843	0.593715	0.366374	0.985159	0.490494	0.308526	0.17579	0.544514	0.499996
GSM2235717	0.655087	0.390172	0.383121	0.349964	0.533898	0.810401	0.423728	0.987487	0.644712	0.420665	0.265312	0.703852	0.548052
GSM2235718	0.671564	0.303265	0.412671	0.37596	0.714638	0.777066	0.551999	0.991526	0.699437	0.50091	0.337103	0.84097	0.521983
GSM2235719	0.584545	0.287123	0.3949	0.328352	0.674495	0.734484	0.532384	0.993166	0.6775	0.41697	0.225844	0.679508	0.479787
GSM2235720	0.486595	0.334236	0.369667	0.324643	0.570232	0.810301	0.521479	0.991597	0.641301	0.427152	0.234424	0.605481	0.493697
GSM2235721	0.497986	0.325277	0.412374	0.34524	0.641093	0.722612	0.555282	0.971398	0.679024	0.455395	0.25585	0.625533	0.475973
GSM2235722	0.622567	0.38105	0.415787	0.385316	0.664872	0.837576	0.603805	0.9967	0.747618	0.497293	0.308024	0.897354	0.49443
GSM2235723	0.404576	0.242784	0.304364	0.229377	0.259494	0.640038	0.299475	0.983627	0.47052	0.330115	0.129308	0.475885	0.438307
GSM2235724	0.604074	0.363068	0.422269	0.385598	0.592911	0.825664	0.579691	0.988533	0.710082	0.440066	0.317232	0.739677	0.535475
GSM2235725	0.531841	0.502897	0.459254	0.480184	0.934359	0.864178	0.742994	0.998056	0.741108	0.600668	0.369741	0.815665	0.463838
GSM2235726	0.701204	0.420775	0.480235	0.523738	0.896959	0.895814	0.752872	0.997632	0.738964	0.685337	0.504975	0.915567	0.641629
GSM2235727	0.650479	0.272089	0.394309	0.354753	0.748893	0.808571	0.554072	0.986614	0.654933	0.476713	0.272417	0.698736	0.489377
GSM2235728	0.635321	0.322329	0.415363	0.350434	0.637859	0.781124	0.518428	0.991869	0.657753	0.435411	0.316032	0.618677	0.688834
GSM2235729	0.649533	0.364003	0.430723	0.400254	0.743153	0.807708	0.617815	0.993198	0.70588	0.510438	0.351094	0.812955	0.575756
GSM2235730	0.593084	0.249436	0.368659	0.301014	0.481195	0.72341	0.432679	0.993457	0.656852	0.406	0.25608	0.682402	0.506757
GSM2235731	0.608706	0.317658	0.376434	0.340686	0.776449	0.763225	0.598317	0.997152	0.617412	0.487899	0.291275	0.730096	0.47861
GSM2235732	0.559869	0.318316	0.432129	0.393727	0.704042	0.808848	0.616033	0.991206	0.715461	0.502178	0.348337	0.887909	0.560795
GSM2235733	0.569063	0.366543	0.439384	0.39537	0.650858	0.81964	0.620972	0.995768	0.714287	0.444929	0.279187	0.844848	0.494518
GSM2235734	0.555843	0.309935	0.378818	0.346738	0.376027	0.763169	0.439244	0.989639	0.630472	0.427347	0.283856	0.761061	0.647706
GSM2235735	0.564384	0.335625	0.416176	0.354387	0.463335	0.790627	0.530342	0.997657	0.715081	0.480129	0.190609	0.910239	0.514482
GSM2235736	0.270726	0.273391	0.331331	0.252389	0.320881	0.55523	0.285311	0.875989	0.530301	0.287895	0.180824	0.539064	0.484148
GSM2235737	0.594831	0.450394	0.438234	0.414092	0.457337	0.831718	0.54747	0.983394	0.72827	0.508768	0.347538	0.842316	0.524015
GSM2235738	0.603551	0.378678	0.362621	0.360393	0.562053	0.733177	0.452534	0.996487	0.585487	0.428733	0.310743	0.643735	0.475619
GSM2235739	0.537051	0.293279	0.362641	0.275633	0.257332	0.681777	0.400458	0.984802	0.592066	0.3204	0.151971	0.467219	0.445475
GSM2235740	0.689263	0.380801	0.404462	0.36128	0.734601	0.746517	0.552007	0.992166	0.675653	0.457707	0.262022	0.816317	0.538435
GSM2235741	0.465762	0.319918	0.369218	0.325367	0.258428	0.75515	0.381863	0.96634	0.532851	0.376676	0.291171	0.44009	0.519012
GSM2235742	0.475305	0.351874	0.395253	0.360138	0.637892	0.826235	0.598474	0.989803	0.612688	0.466641	0.331494	0.654254	0.480919
GSM2235743	0.579315	0.346868	0.426397	0.372296	0.620667	0.760039	0.511997	0.994442	0.674614	0.461846	0.309005	0.705803	0.546686
GSM2235744	0.632397	0.318192	0.371063	0.34313	0.508703	0.769187	0.342836	0.980769	0.638254	0.399771	0.272275	0.704531	0.581177
GSM2235745	0.597654	0.350544	0.397443	0.3963	0.741103	0.837099	0.644777	0.987923	0.631887	0.551885	0.320001	0.740676	0.583666
GSM2235746	0.667542	0.272762	0.389681	0.32726	0.673808	0.800269	0.522331	0.990141	0.60275	0.484874	0.243434	0.749914	0.598887
GSM2235747	0.616868	0.378968	0.394923	0.389951	0.693231	0.767914	0.524054	0.994868	0.673156	0.4523	0.2522	0.696054	0.480569
GSM2235748	0.561352	0.320184	0.409909	0.329493	0.494281	0.759523	0.551449	0.980503	0.661896	0.458081	0.218273	0.728992	0.647204
GSM2235749	0.491233	0.325155	0.368998	0.295493	0.269352	0.641127	0.395005	0.988388	0.677993	0.373171	0.157715	0.638298	0.556553
GSM2235750	0.51518	0.304997	0.359309	0.318749	0.286464	0.71594	0.375579	0.979091	0.619445	0.393574	0.16326	0.623406	0.493997
GSM2235751	0.458365	0.33673	0.375694	0.404069	0.733717	0.780979	0.622638	0.987468	0.651337	0.516833	0.268822	0.57521	0.47151
GSM2235752	0.673272	0.386953	0.437251	0.439814	0.86703	0.813405	0.66572	0.99638	0.685647	0.641027	0.362661	0.804117	0.470879
GSM2235753	0.602284	0.329723	0.414425	0.393498	0.761219	0.845246	0.644359	0.99105	0.596303	0.489056	0.37898	0.645838	0.499808
GSM2235754	0.582768	0.349519	0.409722	0.356362	0.452934	0.766983	0.438661	0.982357	0.693939	0.436288	0.19416	0.721277	0.530721
GSM2235755	0.581682	0.290548	0.375814	0.329237	0.666515	0.792139	0.513102	0.971021	0.612309	0.431679	0.263404	0.669506	0.561736
GSM2235756	0.464855	0.409294	0.410257	0.397269	0.602516	0.803074	0.597795	0.985051	0.673688	0.476649	0.311783	0.768896	0.598417
GSM2235757	0.381791	0.28581	0.387423	0.321687	0.415953	0.770452	0.538447	0.992126	0.707165	0.426905	0.248544	0.727019	0.452777
GSM2235758	0.503458	0.254178	0.348573	0.289688	0.293263	0.785784	0.365524	0.993564	0.652867	0.360904	0.124818	0.642435	0.429858
GSM2235759	0.496863	0.456447	0.411652	0.376398	0.59381	0.764632	0.488285	0.976018	0.635945	0.436892	0.226384	0.693465	0.601181
GSM2235760	0.502183	0.292283	0.3469	0.281877	0.442421	0.697279	0.434414	0.972034	0.604756	0.361306	0.153244	0.608349	0.513784
GSM2235761	0.595084	0.373736	0.400185	0.371853	0.576174	0.815326	0.56346	0.991951	0.676532	0.466413	0.303595	0.800152	0.656043
GSM2235762	0.595228	0.333891	0.36487	0.346581	0.493838	0.756448	0.445955	0.958762	0.618075	0.452613	0.238285	0.602847	0.468646
GSM2235763	0.633277	0.310667	0.414024	0.363626	0.597674	0.807641	0.638817	0.994201	0.667046	0.482026	0.312884	0.596441	0.491153
GSM2235764	0.543923	0.345624	0.365176	0.345564	0.455138	0.732571	0.507202	0.993349	0.714005	0.438993	0.219447	0.784608	0.540942
GSM2235765	0.54874	0.32389	0.419733	0.354623	0.428756	0.768375	0.589923	0.988376	0.680842	0.447155	0.266157	0.745963	0.462072
GSM2235766	0.446752	0.284667	0.344057	0.276531	0.381556	0.658369	0.428616	0.973194	0.665602	0.354131	0.213033	0.74123	0.530641
GSM2235767	0.505155	0.235548	0.359507	0.291712	0.49286	0.753052	0.442204	0.958695	0.621766	0.432076	0.173611	0.761684	0.597327
GSM2235768	0.529472	0.48855	0.474046	0.472946	0.854387	0.874344	0.753521	0.997232	0.731402	0.556544	0.410178	0.827136	0.465243
GSM2235769	0.416047	0.329782	0.360211	0.31952	0.371258	0.70731	0.443925	0.989852	0.594652	0.337101	0.217148	0.6105	0.441401
GSM2235770	0.65223	0.438045	0.41151	0.365042	0.609739	0.726837	0.524661	0.992615	0.712413	0.42927	0.272152	0.773146	0.507526
GSM2235771	0.577922	0.417956	0.421736	0.364397	0.555906	0.76241	0.560762	0.992032	0.707184	0.435618	0.28502	0.817564	0.605092
GSM2235772	0.496777	0.367542	0.421889	0.346397	0.538728	0.774032	0.579313	0.992167	0.703559	0.434315	0.259511	0.837345	0.617841
GSM2235773	0.529701	0.334702	0.404667	0.34923	0.581341	0.815284	0.590237	0.992512	0.720637	0.444493	0.245672	0.788253	0.576045
GSM2235774	0.483454	0.342703	0.380764	0.351596	0.532055	0.827703	0.531907	0.989414	0.710468	0.433859	0.236827	0.735526	0.543115
GSM2235775	0.531134	0.389867	0.400786	0.371098	0.651013	0.86188	0.592708	0.996357	0.719581	0.462879	0.263739	0.743505	0.528084
GSM2235776	0.535949	0.345201	0.395308	0.357089	0.657041	0.855345	0.586277	0.994181	0.733118	0.466999	0.25723	0.752258	0.549332
GSM2235777	0.497778	0.373398	0.416417	0.416641	0.841583	0.858974	0.714285	0.995879	0.748973	0.530344	0.348959	0.78518	0.560236
GSM2235778	0.622366	0.319341	0.352436	0.299177	0.372283	0.665939	0.350412	0.979355	0.675477	0.374012	0.136209	0.699711	0.478304
GSM2235779	0.463186	0.388453	0.376182	0.388867	0.77991	0.798551	0.700884	0.995715	0.736565	0.535381	0.291501	0.892367	0.444167
GSM2235780	0.574816	0.490536	0.401614	0.410707	0.797092	0.815545	0.613448	0.993646	0.723191	0.461061	0.319496	0.771889	0.537129
GSM2235781	0.502916	0.313759	0.38816	0.307726	0.67806	0.725492	0.554666	0.988579	0.703265	0.374449	0.262777	0.741528	0.481488
GSM2235782	0.425192	0.34466	0.4101	0.352848	0.674288	0.736077	0.61308	0.986572	0.681325	0.426848	0.27096	0.736272	0.455398
GSM2235783	0.629178	0.330452	0.406843	0.346911	0.6773	0.7546	0.554919	0.98203	0.682254	0.436208	0.284853	0.748557	0.569299
GSM2235784	0.557918	0.430381	0.433718	0.436551	0.877875	0.848501	0.736842	0.994758	0.716879	0.53416	0.429267	0.805965	0.505314
GSM2235785	0.586287	0.466272	0.465275	0.501772	0.930799	0.824698	0.741722	0.995075	0.742481	0.684536	0.453234	0.881562	0.493278
GSM2235786	0.632376	0.385546	0.403479	0.402726	0.607568	0.838947	0.573612	0.98925	0.606162	0.483028	0.372542	0.708869	0.7583
GSM2235787	0.576398	0.352905	0.415209	0.335488	0.49384	0.777254	0.489879	0.993913	0.682071	0.391485	0.263453	0.765958	0.633851
GSM2235788	0.631456	0.408578	0.450353	0.458521	0.759898	0.885313	0.689304	0.996965	0.670846	0.589535	0.46197	0.772704	0.539794
GSM2235789	0.560298	0.377981	0.402147	0.392193	0.754261	0.836146	0.637159	0.995502	0.729379	0.593264	0.276129	0.858744	0.546622
GSM2235790	0.625012	0.382609	0.424414	0.389685	0.519886	0.802995	0.597295	0.990864	0.65746	0.519188	0.374127	0.736911	0.51536
GSM2235791	0.545467	0.334985	0.387581	0.344213	0.568306	0.8262	0.517067	0.985951	0.673699	0.437817	0.255042	0.791258	0.629258
GSM2235792	0.629941	0.378522	0.384549	0.34677	0.436604	0.766537	0.463622	0.976965	0.666404	0.467344	0.174346	0.705617	0.504939
GSM2235793	0.521079	0.341185	0.425656	0.351395	0.590047	0.790539	0.514694	0.981291	0.687386	0.441166	0.27748	0.714227	0.711007
GSM2235794	0.515893	0.335102	0.400339	0.363868	0.72864	0.803632	0.626348	0.994442	0.705711	0.486362	0.347019	0.876174	0.553098
GSM2235795	0.37809	0.312142	0.382972	0.296698	0.358886	0.731399	0.293913	0.953106	0.667616	0.354907	0.11485	0.561766	0.479454
GSM2235796	0.628081	0.346995	0.424906	0.336372	0.698356	0.770231	0.47198	0.984741	0.694585	0.413515	0.242563	0.688216	0.607894
GSM2235797	0.576932	0.342684	0.376987	0.373066	0.845216	0.787178	0.637494	0.99428	0.675219	0.483564	0.246827	0.739887	0.436169
GSM2235798	0.552291	0.326413	0.360571	0.284045	0.481878	0.705501	0.412204	0.989607	0.690461	0.365729	0.175663	0.766881	0.462535
GSM2235799	0.625887	0.266268	0.356239	0.279699	0.409528	0.760095	0.442749	0.986883	0.683645	0.35357	0.178066	0.650032	0.452745
GSM2235800	0.66141	0.388884	0.433914	0.42065	0.828308	0.842495	0.682619	0.994762	0.700311	0.524099	0.398768	0.860549	0.596582
GSM2235801	0.683265	0.349763	0.422894	0.381639	0.617597	0.811575	0.545552	0.982448	0.676026	0.479557	0.338867	0.760736	0.591515
GSM2235802	0.450787	0.363021	0.440644	0.395921	0.785605	0.837431	0.690311	0.996087	0.721489	0.542966	0.369565	0.796391	0.546446
GSM2235803	0.590291	0.36594	0.37384	0.358268	0.629864	0.720539	0.600219	0.984525	0.646337	0.469467	0.283898	0.786947	0.490389
GSM2235804	0.545829	0.409807	0.394415	0.367142	0.544327	0.764292	0.464305	0.976682	0.633549	0.452339	0.29446	0.674586	0.600964
GSM2235805	0.467736	0.409555	0.390428	0.339561	0.366767	0.718554	0.393585	0.98311	0.611559	0.379424	0.20603	0.585832	0.617671
GSM2235806	0.654433	0.399558	0.363826	0.35452	0.37501	0.692766	0.335092	0.976144	0.645814	0.468379	0.177564	0.644808	0.494535
GSM2235807	0.564522	0.320081	0.39193	0.307627	0.441386	0.729314	0.514255	0.991627	0.656634	0.391401	0.184851	0.754425	0.660575
GSM2235808	0.530666	0.459646	0.436048	0.40232	0.576897	0.844035	0.641258	0.99564	0.686843	0.494436	0.332124	0.753137	0.523174
GSM2235809	0.652622	0.380006	0.434519	0.404594	0.779605	0.820384	0.666806	0.997604	0.676282	0.578716	0.353507	0.679467	0.57508
GSM2235810	0.563117	0.309785	0.357148	0.319289	0.49046	0.637168	0.475046	0.984999	0.70407	0.353302	0.140048	0.847722	0.381674
GSM2235811	0.609691	0.34039	0.389231	0.32967	0.588662	0.81695	0.552216	0.985651	0.631572	0.400366	0.227578	0.573117	0.484113
GSM2235812	0.575904	0.296896	0.350199	0.29383	0.465588	0.702075	0.460151	0.990676	0.65393	0.401322	0.163489	0.635242	0.485994
GSM2235813	0.528159	0.353476	0.42156	0.360881	0.576945	0.830517	0.648285	0.995028	0.694411	0.455154	0.317243	0.766237	0.478344
GSM2235814	0.626779	0.331061	0.419818	0.347745	0.704085	0.822586	0.647393	0.985282	0.676586	0.469822	0.317383	0.734122	0.488668
GSM2235815	0.539574	0.312469	0.38165	0.302717	0.536378	0.713185	0.577141	0.97786	0.691613	0.324726	0.255344	0.624424	0.45509
GSM2235816	0.638832	0.310751	0.436267	0.348292	0.70153	0.81858	0.647702	0.994628	0.738813	0.446677	0.304787	0.914831	0.598847
GSM2235817	0.539161	0.277962	0.371907	0.325904	0.553681	0.813162	0.44509	0.963687	0.596916	0.382332	0.202049	0.697729	0.501753
GSM2235818	0.57416	0.420795	0.430537	0.415021	0.816405	0.856605	0.693218	0.995423	0.76456	0.504086	0.335893	0.838446	0.488091
GSM2235819	0.531878	0.285433	0.359015	0.288869	0.420773	0.710845	0.368291	0.973877	0.703818	0.329001	0.150141	0.725142	0.42588
GSM2235820	0.640455	0.342043	0.410511	0.370553	0.683135	0.824776	0.596578	0.983268	0.651672	0.432322	0.328693	0.62638	0.59258
GSM2235821	0.499508	0.384349	0.414484	0.385538	0.758942	0.856233	0.681953	0.995078	0.654968	0.453192	0.342124	0.653836	0.499521
GSM2235822	0.375319	0.317428	0.347176	0.304987	0.619244	0.796616	0.479943	0.993697	0.634262	0.339144	0.201641	0.665241	0.447285
GSM2235823	0.635556	0.350993	0.418495	0.386308	0.639642	0.838297	0.590429	0.984923	0.65938	0.472498	0.363017	0.752119	0.62839
GSM2235824	0.638819	0.374371	0.400355	0.375658	0.601517	0.827244	0.567688	0.983919	0.696341	0.460786	0.316007	0.856405	0.63822
GSM2235825	0.485549	0.309602	0.40439	0.311633	0.453829	0.747619	0.446758	0.969131	0.662794	0.393019	0.18674	0.74104	0.582541
GSM2235826	0.368003	0.319078	0.391109	0.279823	0.562973	0.713132	0.536269	0.988318	0.689382	0.3846	0.185705	0.813017	0.496972
GSM2235827	0.64246	0.310735	0.393253	0.344228	0.601801	0.787702	0.507722	0.96216	0.606391	0.412096	0.287591	0.619384	0.62959
GSM2235828	0.712664	0.452364	0.455313	0.483852	0.902316	0.87226	0.738033	0.993777	0.737018	0.557315	0.433592	0.759957	0.544875
GSM2235829	0.625281	0.380432	0.401412	0.365391	0.690362	0.735871	0.627543	0.990238	0.714887	0.416653	0.292564	0.806483	0.487888
GSM2235830	0.590649	0.360463	0.365221	0.294036	0.288138	0.695212	0.341027	0.995931	0.690766	0.351152	0.123361	0.805196	0.54231
GSM2235831	0.690656	0.298915	0.369252	0.325047	0.427483	0.714482	0.490563	0.987349	0.720967	0.390353	0.174105	0.871744	0.5691
GSM2235837	0.348231	0.404958	0.41345	0.370039	0.509092	0.810844	0.527717	0.981175	0.655789	0.391806	0.301602	0.677406	0.538462
GSM2235838	0.495894	0.39661	0.394329	0.352452	0.426091	0.683096	0.486417	0.984339	0.636098	0.398077	0.281415	0.748197	0.568189
GSM2235839	0.355674	0.369224	0.399482	0.324106	0.562957	0.779472	0.609736	0.997313	0.673828	0.374995	0.212126	0.82692	0.528673
GSM2235840	0.334193	0.334825	0.390359	0.284371	0.52515	0.639274	0.471005	0.97358	0.587233	0.302014	0.257653	0.593901	0.505994
GSM2235841	0.571875	0.290691	0.40986	0.337605	0.582598	0.7868	0.544848	0.981667	0.709542	0.407644	0.218008	0.783179	0.600295
GSM2235842	0.386196	0.362613	0.346362	0.303557	0.322458	0.705223	0.40423	0.98166	0.617277	0.304695	0.141944	0.619427	0.474622
GSM2235843	0.596501	0.327769	0.416272	0.34006	0.539865	0.82199	0.543883	0.980725	0.653721	0.402938	0.228588	0.713678	0.618217
GSM2235844	0.449395	0.385326	0.409528	0.362153	0.723777	0.863497	0.69299	0.995503	0.693219	0.376533	0.274886	0.686025	0.468425
GSM2235845	0.559814	0.371055	0.418719	0.370176	0.576664	0.838887	0.606757	0.992137	0.647628	0.414075	0.309957	0.627905	0.519902
GSM2235846	0.587199	0.354569	0.409313	0.349246	0.483513	0.805132	0.479187	0.987616	0.6537	0.370799	0.25742	0.669315	0.553905
GSM2235847	0.669539	0.428535	0.450931	0.49446	0.89585	0.864222	0.741663	0.99513	0.737871	0.670402	0.474263	0.860045	0.56403
GSM2235848	0.602118	0.377837	0.386937	0.381426	0.492046	0.8182	0.505657	0.956962	0.627533	0.427999	0.27311	0.746754	0.650842
GSM2235849	0.630091	0.290029	0.37789	0.34887	0.61075	0.789236	0.530551	0.970806	0.675069	0.452387	0.278034	0.808167	0.564464
GSM2235850	0.660832	0.31799	0.426444	0.384763	0.595605	0.823307	0.592425	0.97934	0.682785	0.513751	0.327622	0.718239	0.641017
GSM2235851	0.622348	0.334533	0.403445	0.341373	0.506129	0.835945	0.494661	0.988027	0.618753	0.398715	0.310474	0.618861	0.583771
GSM2235852	0.637532	0.458568	0.434568	0.455433	0.680699	0.890569	0.6133	0.985453	0.662765	0.5212	0.512841	0.742425	0.693111
GSM2235853	0.707626	0.421161	0.444886	0.450271	0.787845	0.854734	0.697775	0.996407	0.722312	0.579671	0.450799	0.818789	0.605301
GSM2235854	0.64647	0.338198	0.399838	0.385419	0.668036	0.822724	0.570977	0.974898	0.638297	0.51677	0.361082	0.622271	0.534353
GSM2235855	0.695939	0.409835	0.463995	0.494979	0.937063	0.901345	0.746199	0.993485	0.711539	0.68865	0.527032	0.881099	0.624258
GSM2235862	0.653909	0.425131	0.445212	0.490767	0.95691	0.811913	0.766863	0.995556	0.670404	0.628911	0.489027	0.741934	0.509117
GSM2235863	0.644813	0.376581	0.390636	0.344	0.449901	0.8154	0.477159	0.987874	0.707323	0.439162	0.263615	0.864997	0.555247
GSM2235864	0.675252	0.297647	0.393909	0.333626	0.534459	0.766201	0.398036	0.967977	0.633582	0.409016	0.234691	0.680323	0.510407
GSM2235865	0.600387	0.328674	0.358984	0.306125	0.448505	0.687695	0.409088	0.96813	0.651231	0.361949	0.17064	0.72108	0.549333
GSM2235866	0.53226	0.3977	0.403217	0.37517	0.595017	0.818603	0.526729	0.969522	0.691471	0.398843	0.244315	0.773178	0.470769
GSM2235867	0.669458	0.343154	0.410667	0.390209	0.847493	0.820497	0.655743	0.994305	0.745672	0.531059	0.30577	0.904041	0.502727
GSM2235878	0.546079	0.352612	0.436601	0.352019	0.758407	0.736144	0.609087	0.98613	0.709213	0.441646	0.337924	0.801272	0.523904
GSM2235879	0.608024	0.391977	0.426899	0.377003	0.633986	0.784418	0.553368	0.990199	0.734816	0.493997	0.278214	0.877621	0.477957
GSM2235880	0.642334	0.310791	0.391921	0.359838	0.707447	0.812696	0.550261	0.974449	0.631504	0.445857	0.325534	0.610501	0.599079
GSM2235881	0.64071	0.310679	0.40463	0.331698	0.462961	0.776772	0.448688	0.982918	0.655905	0.406477	0.240516	0.622728	0.523684
GSM2235882	0.579757	0.393688	0.435234	0.417915	0.74874	0.840426	0.655171	0.98277	0.713403	0.500623	0.365021	0.770416	0.567205
GSM2235883	0.566106	0.312477	0.420017	0.3637	0.615651	0.805267	0.527879	0.969549	0.647252	0.472905	0.314643	0.732689	0.625411
GSM2235884	0.656458	0.406068	0.462021	0.455754	0.720025	0.821976	0.642703	0.986272	0.693028	0.559184	0.477615	0.752794	0.711097
GSM2235885	0.545861	0.535136	0.452194	0.504156	0.91608	0.873899	0.716632	0.996167	0.735536	0.585747	0.440652	0.828812	0.499548
GSM2235886	0.414592	0.36195	0.408942	0.323274	0.412683	0.758732	0.37993	0.975091	0.63927	0.40279	0.193353	0.47714	0.504353
GSM2235887	0.494179	0.302465	0.365393	0.278534	0.45503	0.666019	0.466628	0.977119	0.669587	0.333352	0.132951	0.771789	0.45421
GSM2235888	0.66997	0.306079	0.38058	0.347018	0.512956	0.793171	0.453795	0.969436	0.599464	0.437783	0.274531	0.589235	0.640572
GSM2235889	0.630156	0.397172	0.420087	0.380376	0.425655	0.725598	0.541087	0.989625	0.670933	0.503276	0.354771	0.665147	0.52964
GSM2235899	0.546856	0.374094	0.415977	0.382337	0.591426	0.768515	0.565498	0.985459	0.716317	0.46801	0.339014	0.825965	0.502872
GSM2235900	0.690929	0.353539	0.424242	0.405106	0.689502	0.858473	0.593415	0.987613	0.709559	0.524297	0.343645	0.686659	0.522647
GSM2235901	0.428983	0.328511	0.381255	0.294697	0.298987	0.725259	0.469781	0.992347	0.72963	0.387338	0.20775	0.892084	0.490315
GSM2235902	0.53588	0.324302	0.369339	0.318739	0.65393	0.815308	0.487962	0.964973	0.592258	0.409733	0.242476	0.715942	0.602889
GSM2235903	0.504731	0.375959	0.395206	0.334868	0.38673	0.688735	0.458126	0.953402	0.588176	0.401498	0.207664	0.562503	0.486331
GSM2235904	0.626762	0.312923	0.347085	0.336158	0.241532	0.700587	0.344209	0.981886	0.66608	0.415318	0.153084	0.728632	0.547397
GSM2235905	0.629118	0.39148	0.420809	0.415454	0.72147	0.870582	0.610538	0.978328	0.68077	0.533181	0.390563	0.760763	0.631488
GSM2235906	0.55934	0.337351	0.408191	0.354853	0.498255	0.789513	0.476795	0.987885	0.668614	0.378669	0.274874	0.590538	0.50279
GSM2235907	0.509822	0.369151	0.422876	0.394139	0.858358	0.762383	0.694628	0.995768	0.729132	0.477221	0.251635	0.848904	0.479025
GSM2235908	0.590478	0.328264	0.355225	0.312581	0.410835	0.722965	0.42816	0.984376	0.632157	0.419111	0.202321	0.705335	0.565338
GSM2235909	0.522375	0.313532	0.378394	0.333162	0.752317	0.741468	0.592401	0.989851	0.645847	0.416113	0.291514	0.675571	0.511278
GSM2235910	0.497809	0.448456	0.468858	0.48047	0.762568	0.860514	0.731065	0.998296	0.717684	0.583201	0.440949	0.842863	0.529958
GSM2235921	0.530181	0.351358	0.335588	0.292682	0.267409	0.652326	0.45427	0.988682	0.573364	0.33416	0.203614	0.515971	0.492304
GSM2235922	0.56598	0.381261	0.401196	0.398566	0.75616	0.770338	0.675801	0.996433	0.735667	0.502361	0.35858	0.889593	0.477027
GSM2235923	0.5933	0.327619	0.350166	0.322391	0.410315	0.629516	0.431055	0.991188	0.662548	0.361812	0.207525	0.786615	0.471022
GSM2235924	0.568665	0.3684	0.374682	0.32983	0.415992	0.726815	0.49308	0.99311	0.658256	0.358766	0.19945	0.740175	0.509521
GSM2235925	0.623268	0.392439	0.409004	0.367995	0.446873	0.72807	0.466521	0.984413	0.614403	0.390984	0.353502	0.563745	0.585955
GSM2235926	0.641083	0.417779	0.45972	0.464465	0.832545	0.874757	0.737361	0.996727	0.700055	0.585472	0.453532	0.719438	0.570507
GSM2235927	0.609739	0.304783	0.347357	0.28719	0.285366	0.646836	0.356171	0.988268	0.650386	0.318122	0.150412	0.749975	0.465648
GSM2235928	0.415569	0.332182	0.365632	0.308369	0.386969	0.680438	0.426887	0.978352	0.682785	0.368497	0.145224	0.71155	0.456322
GSM2235929	0.472206	0.340357	0.398847	0.367215	0.666423	0.805983	0.53509	0.971025	0.605081	0.464325	0.306908	0.624385	0.752771
GSM2235930	0.624167	0.333574	0.367322	0.349468	0.347011	0.721727	0.374967	0.994099	0.622155	0.42203	0.294462	0.69452	0.568967
GSM2235931	0.634603	0.391084	0.405636	0.420613	0.703328	0.826674	0.61821	0.99561	0.689195	0.588141	0.388173	0.831189	0.512184
GSM2235932	0.64309	0.407173	0.395571	0.387428	0.575877	0.783864	0.598669	0.988453	0.679665	0.474105	0.280257	0.75052	0.469675
GSM2235933	0.583557	0.550178	0.454238	0.446051	0.562498	0.842947	0.534405	0.961637	0.673754	0.485699	0.356335	0.738363	0.67756
GSM2235934	0.685367	0.468609	0.500202	0.521806	0.933843	0.88602	0.778675	0.99662	0.760377	0.652219	0.531056	0.906143	0.515144
GSM2235935	0.633786	0.372322	0.388512	0.342137	0.64199	0.796627	0.510443	0.977383	0.6595	0.439136	0.220464	0.672006	0.483881
GSM2235936	0.642093	0.270991	0.360758	0.296004	0.443286	0.730942	0.41428	0.964132	0.574635	0.375738	0.202909	0.622943	0.523166
GSM2235937	0.652171	0.29661	0.379056	0.310437	0.409761	0.690969	0.384888	0.985086	0.625205	0.372745	0.175354	0.571801	0.462798
GSM2235938	0.508596	0.318022	0.382595	0.291933	0.540981	0.732475	0.464948	0.98397	0.639601	0.365758	0.197497	0.502734	0.448611
GSM2235939	0.623853	0.265079	0.377226	0.320463	0.599678	0.799173	0.472711	0.971746	0.608614	0.439556	0.232024	0.736963	0.543262
GSM2235940	0.678168	0.341695	0.414848	0.369544	0.883579	0.836356	0.655245	0.99091	0.71466	0.486641	0.295597	0.782787	0.568772
GSM2235941	0.653952	0.481116	0.449169	0.471866	0.853383	0.894484	0.719492	0.99606	0.757322	0.557012	0.389442	0.769426	0.456646
GSM2235942	0.677982	0.293244	0.373938	0.326998	0.666053	0.780821	0.504838	0.985537	0.639883	0.417458	0.226588	0.674869	0.457678
GSM2235943	0.550912	0.473988	0.427653	0.467236	0.954867	0.836763	0.754881	0.996673	0.654755	0.567874	0.427398	0.719849	0.520606
GSM2235944	0.651415	0.415379	0.41264	0.414724	0.608563	0.885353	0.533954	0.970494	0.635363	0.475059	0.409561	0.708564	0.691654
GSM2235945	0.454136	0.451729	0.408531	0.41238	0.430256	0.837349	0.549508	0.991949	0.702734	0.453135	0.318004	0.840878	0.475732
GSM2235946	0.542211	0.386324	0.38222	0.349463	0.428359	0.710826	0.52843	0.996115	0.691163	0.437935	0.311543	0.82969	0.499598
GSM2235947	0.512628	0.430109	0.419237	0.445252	0.784022	0.891048	0.716208	0.997232	0.729047	0.58381	0.374324	0.867506	0.496696
GSM2235948	0.529954	0.371694	0.438759	0.388482	0.661667	0.83281	0.547622	0.963307	0.623452	0.47611	0.36107	0.672322	0.7817
GSM2235949	0.631924	0.433192	0.462252	0.453988	0.804269	0.853818	0.703362	0.99569	0.717875	0.553144	0.488886	0.790945	0.59196
GSM2235950	0.487428	0.315248	0.361465	0.304764	0.639254	0.732943	0.417813	0.945534	0.554311	0.416007	0.240778	0.683459	0.66168
GSM2235951	0.561888	0.339482	0.372667	0.343563	0.626811	0.793369	0.453522	0.965646	0.638151	0.43432	0.271161	0.694198	0.623564
GSM2235952	0.548679	0.412991	0.409479	0.377888	0.823619	0.754897	0.697109	0.990856	0.675258	0.491656	0.28068	0.703265	0.474209
GSM2235953	0.535475	0.266947	0.313641	0.269017	0.260492	0.646155	0.285056	0.974024	0.61837	0.290417	0.0991625	0.735628	0.494616
GSM2235954	0.587697	0.394008	0.426781	0.402932	0.817806	0.878156	0.686722	0.995079	0.683773	0.518252	0.385925	0.730981	0.520655
GSM2235955	0.572532	0.401218	0.3928	0.371107	0.632823	0.74127	0.557499	0.96297	0.644195	0.429659	0.312946	0.671344	0.491219
GSM2235956	0.348932	0.328173	0.353915	0.303827	0.461042	0.637573	0.428134	0.984894	0.693548	0.348215	0.180854	0.814503	0.470436
GSM2235957	0.546879	0.352183	0.395819	0.362548	0.787926	0.798392	0.656582	0.995982	0.657588	0.431789	0.278571	0.603802	0.492414
GSM2235958	0.603498	0.301955	0.361818	0.352657	0.43987	0.789141	0.376947	0.976183	0.585347	0.426227	0.246638	0.600538	0.64709
GSM2235959	0.31616	0.358886	0.342825	0.310226	0.589582	0.648501	0.532391	0.980077	0.670401	0.385017	0.181218	0.584633	0.501603
GSM2235960	0.669808	0.386481	0.39468	0.352162	0.673102	0.703025	0.521504	0.989604	0.656079	0.352928	0.215496	0.682298	0.438028
GSM2235961	0.492007	0.328968	0.378061	0.337328	0.538074	0.745078	0.379137	0.974068	0.61474	0.428114	0.175291	0.5685	0.627386
GSM2235962	0.50672	0.397591	0.438529	0.391003	0.648651	0.856031	0.652435	0.996461	0.781435	0.498458	0.285376	0.84687	0.474786
GSM2235963	0.590185	0.254547	0.344616	0.28137	0.307102	0.737254	0.324983	0.983505	0.590683	0.343367	0.145871	0.500389	0.4487
GSM2235964	0.625746	0.381152	0.424405	0.414724	0.777202	0.864199	0.653992	0.992402	0.681199	0.579173	0.373198	0.701	0.596926
GSM2235965	0.537556	0.476438	0.341414	0.438326	0.565909	0.728103	0.489654	0.986392	0.628699	0.575648	0.342621	0.668862	0.576804
GSM2235966	0.679159	0.308878	0.37494	0.354685	0.600244	0.764914	0.516676	0.98654	0.578814	0.543455	0.281761	0.726774	0.739688
GSM2235967	0.23691	0.223179	0.265758	0.214538	0.15393	0.643321	0.211424	0.991625	0.438673	0.293157	0.147331	0.563202	0.466273
GSM2235968	0.359294	0.356151	0.328398	0.301609	0.412141	0.704612	0.41827	0.970996	0.52299	0.344896	0.142709	0.6239	0.429579
GSM2235969	0.641262	0.372157	0.37754	0.419147	0.575444	0.744273	0.632762	0.993902	0.628926	0.551104	0.386968	0.699464	0.510373
GSM2235970	0.622214	0.377809	0.413478	0.405794	0.608013	0.822298	0.596317	0.990828	0.731264	0.519089	0.325588	0.790495	0.584039
GSM2235971	0.663973	0.45022	0.40843	0.452107	0.616299	0.802178	0.544567	0.991812	0.669935	0.537217	0.457366	0.77788	0.559859
GSM2235972	0.608772	0.306361	0.341708	0.326811	0.49889	0.724113	0.468605	0.995686	0.590311	0.478192	0.240105	0.524603	0.519361
GSM2235973	0.584005	0.286984	0.329544	0.316621	0.298705	0.686765	0.331993	0.995555	0.584188	0.450816	0.197198	0.672117	0.523072
GSM2235974	0.4929	0.282572	0.327255	0.31648	0.4215	0.712281	0.409666	0.989412	0.569566	0.416244	0.241597	0.53693	0.48062
GSM2235975	0.623028	0.399118	0.412764	0.490171	0.749676	0.770739	0.629323	0.997231	0.653702	0.718368	0.507672	0.653151	0.562158
GSM2235976	0.608638	0.440233	0.405434	0.503408	0.837284	0.801866	0.70024	0.999547	0.675468	0.748862	0.442434	0.818233	0.517536
GSM2235977	0.461209	0.314874	0.316784	0.301449	0.303591	0.626997	0.299752	0.975505	0.626584	0.384286	0.161368	0.655828	0.507044
GSM2235978	0.667563	0.473141	0.444128	0.484932	0.893634	0.882727	0.728901	0.997312	0.688944	0.631105	0.459823	0.784986	0.552341
GSM2235979	0.595196	0.266881	0.392077	0.320787	0.53288	0.789512	0.429137	0.98498	0.653925	0.420976	0.253256	0.689852	0.553511
GSM2235980	0.409023	0.359822	0.435157	0.456076	0.929312	0.751262	0.659094	0.996193	0.764178	0.656155	0.335237	0.866951	0.579935
GSM2235981	0.600964	0.360076	0.40274	0.411639	0.755514	0.827172	0.648712	0.997684	0.713423	0.537881	0.313639	0.874279	0.479898
GSM2235982	0.623964	0.457598	0.428807	0.42914	0.598496	0.84949	0.583275	0.993721	0.730637	0.501298	0.318253	0.714427	0.530841
GSM2235983	0.666017	0.420215	0.484492	0.503572	0.81757	0.888229	0.737008	0.996779	0.711204	0.693597	0.526483	0.740251	0.681147
GSM2235984	0.607109	0.272602	0.381067	0.31695	0.583945	0.76977	0.527621	0.990373	0.689426	0.439228	0.246943	0.776059	0.517324
GSM2235985	0.602139	0.342634	0.436105	0.394376	0.456164	0.83098	0.535985	0.99343	0.711083	0.482136	0.322322	0.762505	0.472967
GSM2235986	0.582433	0.299179	0.368296	0.304301	0.544158	0.803755	0.470456	0.981792	0.61684	0.409814	0.226944	0.612253	0.504423
GSM2235987	0.528261	0.439113	0.436581	0.421403	0.750591	0.833495	0.649755	0.996274	0.760499	0.513458	0.335144	0.742788	0.557323
GSM2235988	0.681726	0.284184	0.370255	0.308061	0.469763	0.736098	0.435111	0.984501	0.616263	0.400756	0.20729	0.669883	0.581743
GSM2235991	0.460704	0.345011	0.391483	0.345401	0.476722	0.808449	0.569304	0.99378	0.668751	0.449449	0.240563	0.761021	0.428626
GSM2235992	0.556651	0.350925	0.368968	0.323107	0.601653	0.741565	0.460993	0.985972	0.676063	0.394654	0.255127	0.829367	0.655758
GSM2235993	0.630364	0.414793	0.464677	0.467773	0.89879	0.885132	0.749226	0.99622	0.72734	0.653857	0.488662	0.826586	0.58575
GSM2235994	0.453362	0.295636	0.341635	0.290853	0.2352	0.597771	0.31354	0.949029	0.517064	0.415782	0.177837	0.610091	0.498882
GSM2235995	0.44562	0.399524	0.36368	0.339695	0.602157	0.718356	0.515558	0.991726	0.712555	0.400176	0.203042	0.880398	0.477268
GSM2235996	0.619615	0.419609	0.524022	0.445184	0.493817	0.734795	0.671906	0.996833	0.742488	0.548042	0.388709	0.771692	0.57581
GSM2235997	0.570989	0.427771	0.426451	0.374201	0.526683	0.782423	0.544352	0.9963	0.671543	0.438529	0.276671	0.628208	0.476823
GSM2235998	0.343801	0.409893	0.36822	0.325024	0.491239	0.688981	0.535133	0.977655	0.632803	0.337771	0.225789	0.560802	0.480009
GSM2235999	0.560552	0.325614	0.390481	0.303939	0.525692	0.695555	0.545924	0.989384	0.623903	0.376734	0.195405	0.561706	0.515386
GSM2236000	0.488429	0.370141	0.376065	0.358515	0.317655	0.731243	0.457165	0.98467	0.601417	0.3975	0.290267	0.535004	0.529992
GSM2236001	0.643909	0.387587	0.390301	0.36142	0.603659	0.764727	0.430837	0.980948	0.688555	0.452355	0.293557	0.783083	0.637759
GSM2236002	0.452106	0.336417	0.324534	0.260352	0.43205	0.576326	0.347801	0.975352	0.553365	0.295243	0.153162	0.468857	0.46826
GSM2236003	0.484175	0.312342	0.330436	0.279073	0.362088	0.738405	0.305507	0.972259	0.563915	0.345689	0.194993	0.628963	0.538304
GSM2236004	0.581446	0.357173	0.371614	0.324812	0.490848	0.745379	0.495002	0.990441	0.704272	0.389431	0.236065	0.782002	0.527162
GSM2236005	0.401914	0.373874	0.364377	0.317978	0.365329	0.8017	0.471405	0.996806	0.671755	0.345064	0.171342	0.652166	0.497154
GSM2236006	0.481156	0.296639	0.37304	0.313339	0.279015	0.652143	0.477724	0.98341	0.646244	0.371101	0.267879	0.650171	0.500949
GSM2236007	0.5469	0.389105	0.448216	0.401217	0.745626	0.849432	0.654264	0.996646	0.781571	0.478392	0.306803	0.865864	0.505546
GSM2236008	0.543316	0.362117	0.449912	0.391809	0.7224	0.835369	0.624342	0.986794	0.675125	0.491993	0.352009	0.744995	0.621961
GSM2236009	0.54628	0.410568	0.365925	0.348655	0.458367	0.772624	0.489116	0.992633	0.647734	0.461118	0.251823	0.801637	0.574992
GSM2236010	0.584379	0.329489	0.370952	0.341864	0.581358	0.781499	0.443107	0.992637	0.594067	0.416689	0.282979	0.61491	0.544054
GSM2236011	0.53533	0.333311	0.387515	0.34865	0.619223	0.748129	0.629363	0.997153	0.641666	0.465964	0.3013	0.645295	0.482585
GSM2236012	0.578252	0.339323	0.402679	0.350987	0.491283	0.805406	0.503973	0.994864	0.691301	0.408459	0.218725	0.786239	0.615284
GSM2236013	0.496517	0.361161	0.429533	0.377064	0.55322	0.82842	0.551313	0.994549	0.695518	0.414385	0.271747	0.751976	0.507247
GSM2236014	0.261854	0.296772	0.388215	0.326975	0.8282	0.645984	0.63798	0.997204	0.603921	0.470382	0.270933	0.648143	0.459182
GSM2236015	0.588388	0.31321	0.398957	0.333854	0.593288	0.801376	0.558975	0.976598	0.621506	0.411179	0.308146	0.626313	0.622998
GSM2236016	0.477247	0.304552	0.382121	0.301907	0.446152	0.741174	0.53447	0.994227	0.643114	0.349719	0.140319	0.597726	0.469982
GSM2236017	0.614776	0.292743	0.37116	0.311796	0.534361	0.692885	0.478763	0.985438	0.638977	0.354858	0.183437	0.728685	0.598796
GSM2236018	0.601645	0.34346	0.409611	0.336528	0.666866	0.70436	0.526188	0.983506	0.653488	0.490226	0.21736	0.725717	0.644092
GSM2236019	0.425089	0.351826	0.365525	0.287883	0.441742	0.656584	0.483553	0.989825	0.601432	0.308742	0.176412	0.509566	0.497104
GSM2236020	0.650404	0.298184	0.387992	0.339684	0.625866	0.845713	0.603144	0.997098	0.701221	0.463315	0.226035	0.915358	0.51942
GSM2236021	0.547813	0.354069	0.384287	0.357239	0.629237	0.764211	0.518755	0.978321	0.620929	0.429152	0.224748	0.682844	0.742599
GSM2236022	0.511268	0.308284	0.364237	0.318914	0.464983	0.690531	0.462027	0.991178	0.669712	0.424756	0.169644	0.855352	0.488856
GSM2236023	0.599584	0.349977	0.429908	0.403936	0.687109	0.90652	0.718741	0.996699	0.73735	0.525375	0.387037	0.845359	0.488828
GSM2236024	0.654145	0.367322	0.432744	0.427302	0.636581	0.876686	0.609575	0.994867	0.639063	0.54739	0.414487	0.648906	0.540658
GSM2236025	0.607698	0.450979	0.454716	0.45268	0.658553	0.882149	0.577254	0.978357	0.673461	0.542701	0.477556	0.712471	0.735842
GSM2236026	0.519794	0.262994	0.414199	0.329485	0.582753	0.765736	0.482799	0.965072	0.586248	0.40635	0.279778	0.573059	0.586146
GSM2236027	0.551595	0.329976	0.432011	0.339845	0.452741	0.719609	0.474181	0.985149	0.63781	0.393445	0.217782	0.537819	0.569832
GSM2236028	0.525438	0.411971	0.4292	0.372709	0.725642	0.817673	0.67329	0.993962	0.730258	0.366057	0.288703	0.76176	0.454451
GSM2236029	0.524054	0.403326	0.412096	0.396681	0.665192	0.890329	0.662215	0.995928	0.670184	0.52395	0.395024	0.704592	0.521251
GSM2236030	0.564462	0.309446	0.384427	0.321733	0.519145	0.724605	0.512036	0.94284	0.601294	0.421751	0.206623	0.545076	0.458759
GSM2236031	0.555545	0.361687	0.40377	0.395079	0.568676	0.823504	0.546536	0.988959	0.68383	0.472697	0.344948	0.834674	0.79379
GSM2236032	0.613443	0.322903	0.392892	0.355088	0.76729	0.829515	0.677796	0.997152	0.668156	0.514622	0.270538	0.750245	0.495695
GSM2236033	0.324284	0.34705	0.336676	0.300261	0.32364	0.69121	0.383567	0.97567	0.618233	0.369296	0.201971	0.663142	0.471691
GSM2236034	0.671073	0.500632	0.455698	0.490192	0.763731	0.908113	0.717613	0.996966	0.742675	0.586319	0.492981	0.825711	0.523001
GSM2236036	0.681948	0.244103	0.333599	0.273319	0.436888	0.720411	0.43825	0.972261	0.604186	0.412189	0.150226	0.72132	0.46279
GSM2236037	0.643378	0.339173	0.385913	0.372143	0.543785	0.778992	0.425535	0.984707	0.705662	0.463506	0.214014	0.814306	0.558433
GSM2236038	0.581743	0.323863	0.389854	0.342751	0.712307	0.817166	0.574958	0.977311	0.661425	0.466729	0.289081	0.752772	0.525856
GSM2236039	0.374494	0.215622	0.340648	0.248093	0.552013	0.639562	0.427462	0.970488	0.59241	0.305856	0.140702	0.591132	0.450544
GSM2236040	0.670881	0.440594	0.381633	0.3404	0.651613	0.792189	0.471473	0.988898	0.669524	0.337499	0.196201	0.755181	0.458745
GSM2236041	0.615205	0.343988	0.457254	0.419092	0.75566	0.837328	0.59445	0.986823	0.736565	0.503337	0.399659	0.821132	0.617761
GSM2236042	0.554152	0.34566	0.369582	0.330696	0.561144	0.755001	0.558489	0.99404	0.654549	0.422353	0.280075	0.710657	0.535285
GSM2236043	0.597212	0.356264	0.419838	0.38445	0.607619	0.855152	0.569867	0.987493	0.704073	0.476938	0.315391	0.766655	0.551164
GSM2236044	0.520618	0.336491	0.338601	0.302462	0.282345	0.647688	0.413639	0.96891	0.59647	0.336607	0.220171	0.623199	0.461005
GSM2236045	0.536684	0.267344	0.418895	0.338937	0.731034	0.798828	0.614835	0.995425	0.73067	0.399461	0.261153	0.813781	0.48601
GSM2236046	0.609018	0.369895	0.347869	0.314959	0.412833	0.819909	0.469664	0.992823	0.636275	0.377106	0.25283	0.710814	0.528299
GSM2236047	0.502963	0.482469	0.423266	0.453526	0.541888	0.854597	0.514347	0.98187	0.637574	0.539135	0.448829	0.58748	0.73999
GSM2236048	0.521718	0.308868	0.358067	0.318747	0.600053	0.896768	0.61249	0.997764	0.584547	0.441773	0.255811	0.573871	0.482336
GSM2236049	0.498391	0.541023	0.424244	0.473085	0.645638	0.898968	0.546276	0.985629	0.6	0.567547	0.512508	0.603916	0.783144
GSM2236050	0.468078	0.301346	0.361226	0.295949	0.456774	0.753801	0.45112	0.982784	0.580901	0.340131	0.223721	0.507334	0.488479
GSM2236051	0.557488	0.369656	0.399269	0.347229	0.53975	0.795622	0.504997	0.983019	0.612896	0.384447	0.246913	0.571564	0.784622
GSM2236052	0.455405	0.368116	0.359272	0.291074	0.410117	0.650263	0.405723	0.988117	0.627175	0.328312	0.180931	0.531985	0.576444
GSM2236053	0.546593	0.36436	0.366308	0.339196	0.295105	0.771421	0.355556	0.974832	0.653028	0.418361	0.215894	0.538583	0.659789
GSM2236054	0.594599	0.342011	0.393606	0.368569	0.416457	0.807738	0.409442	0.990967	0.670724	0.461313	0.318267	0.719299	0.711239
GSM2236055	0.395715	0.30384	0.315653	0.289346	0.515607	0.691519	0.39988	0.981893	0.580108	0.336406	0.151803	0.627427	0.456996
GSM2236056	0.584714	0.299317	0.371569	0.297333	0.446216	0.702857	0.423515	0.990942	0.652736	0.382372	0.218893	0.795132	0.546798
GSM2236057	0.539655	0.319455	0.417664	0.385434	0.646169	0.817586	0.615771	0.990618	0.696325	0.498105	0.348478	0.797712	0.675988
GSM2236058	0.528339	0.256311	0.378407	0.292773	0.467623	0.740471	0.542186	0.989795	0.716128	0.40817	0.205585	0.768861	0.59269
GSM2236059	0.536792	0.378335	0.436811	0.339787	0.38056	0.762529	0.447018	0.978288	0.698477	0.436807	0.205666	0.711218	0.606566
GSM2236060	0.512408	0.389313	0.479244	0.429675	0.779849	0.795378	0.606877	0.988625	0.701631	0.540056	0.419833	0.756821	0.67012
GSM2236061	0.508868	0.475293	0.455732	0.456159	0.771295	0.860853	0.637492	0.990013	0.710646	0.559578	0.449289	0.749467	0.632021
GSM2236062	0.577254	0.310934	0.404673	0.336133	0.640363	0.778809	0.545701	0.993642	0.690943	0.403124	0.229629	0.733177	0.430561
GSM2236063	0.489476	0.326575	0.383914	0.324335	0.527511	0.73377	0.461457	0.989215	0.697493	0.40188	0.222563	0.77233	0.531171
GSM2236064	0.393434	0.381095	0.392973	0.336358	0.575949	0.722132	0.548682	0.990822	0.748879	0.360843	0.232724	0.670639	0.42586
GSM2236065	0.534255	0.331823	0.367807	0.284943	0.433559	0.721646	0.458642	0.983772	0.615441	0.370503	0.168481	0.578377	0.524085
GSM2236066	0.536127	0.397351	0.428048	0.341989	0.415339	0.745611	0.487353	0.979824	0.586994	0.31411	0.279027	0.509178	0.553528
GSM2236067	0.673925	0.403476	0.444416	0.35788	0.485148	0.830216	0.593222	0.989547	0.696802	0.397357	0.280897	0.744576	0.550209
GSM2236068	0.511424	0.277386	0.36545	0.288291	0.614091	0.736596	0.537648	0.942257	0.571937	0.372914	0.209389	0.645323	0.659059
GSM2236069	0.59842	0.320834	0.356949	0.301675	0.34949	0.755779	0.379088	0.971863	0.538595	0.307019	0.190829	0.510126	0.478146
GSM2236070	0.442657	0.436525	0.434228	0.446	0.886555	0.956923	0.752386	0.998482	0.711469	0.590248	0.385191	0.785718	0.5038
GSM2236071	0.607578	0.410637	0.417818	0.404143	0.790851	0.860358	0.694312	0.996035	0.672851	0.511379	0.371848	0.811294	0.497277
GSM2236072	0.574638	0.437394	0.426073	0.398594	0.776927	0.838099	0.679733	0.993435	0.683511	0.43911	0.31597	0.676314	0.468744
GSM2236073	0.450461	0.30269	0.383494	0.31068	0.459635	0.758406	0.452529	0.978597	0.601912	0.370065	0.241445	0.59146	0.638329
GSM2236074	0.227991	0.331733	0.369757	0.324859	0.609919	0.744593	0.568059	0.995265	0.58365	0.421059	0.312986	0.613306	0.539046
GSM2236075	0.532256	0.32276	0.42436	0.354393	0.600606	0.795101	0.536794	0.990366	0.68635	0.453476	0.309405	0.788355	0.726376
GSM2236076	0.624887	0.516312	0.469565	0.518952	0.830029	0.896809	0.706891	0.992663	0.669137	0.658499	0.528117	0.699632	0.549874
GSM2236077	0.576373	0.413275	0.396039	0.394234	0.752785	0.821472	0.673503	0.996301	0.717699	0.534074	0.29905	0.856031	0.504514
GSM2236078	0.274001	0.422827	0.309952	0.299501	0.146914	0.638456	0.239482	0.970417	0.557446	0.314598	0.11498	0.465083	0.50575
GSM2236079	0.524187	0.423466	0.448807	0.437061	0.714122	0.909857	0.647705	0.998562	0.726545	0.544147	0.422626	0.715144	0.583416
GSM2236080	0.490257	0.430586	0.475204	0.416058	0.646112	0.781329	0.630151	0.997658	0.726677	0.467907	0.456279	0.802394	0.640931
GSM2236082	0.650859	0.295687	0.401928	0.367288	0.561616	0.837577	0.569445	0.986328	0.631394	0.477004	0.34331	0.731127	0.716636
GSM2236083	0.55346	0.288145	0.345556	0.317371	0.671606	0.770135	0.481142	0.980067	0.531745	0.460164	0.246289	0.682388	0.724383
GSM2236084	0.632509	0.359637	0.401552	0.350453	0.532846	0.766223	0.502997	0.992682	0.631557	0.453044	0.305142	0.6658	0.580394
GSM2236085	0.516738	0.37812	0.425686	0.373363	0.767275	0.878895	0.65842	0.997683	0.713329	0.516018	0.343835	0.758035	0.544385
GSM2236086	0.5537	0.47165	0.461939	0.487696	0.836133	0.923354	0.74274	0.998402	0.739933	0.618825	0.516613	0.872825	0.501381
GSM2236087	0.446586	0.375899	0.416589	0.379313	0.607638	0.81468	0.620917	0.993746	0.707257	0.453057	0.311196	0.706077	0.546352
GSM2236088	0.535803	0.346522	0.406049	0.328806	0.370423	0.773502	0.507994	0.992338	0.708696	0.420388	0.233949	0.755702	0.543987
GSM2236089	0.553176	0.397235	0.437548	0.376697	0.719764	0.895755	0.683621	0.997071	0.70888	0.479501	0.350463	0.72987	0.529826
GSM2236090	0.543959	0.351936	0.437058	0.374575	0.560123	0.833911	0.647043	0.996273	0.711538	0.484189	0.390669	0.785384	0.656095
GSM2236091	0.481306	0.330564	0.413697	0.335019	0.527467	0.818451	0.606551	0.993272	0.709601	0.421195	0.292113	0.786986	0.578585
GSM2236092	0.471666	0.322362	0.402742	0.309566	0.562296	0.827931	0.622145	0.994148	0.710116	0.428736	0.260072	0.774533	0.489988
GSM2236093	0.508278	0.332814	0.404065	0.322523	0.564461	0.826342	0.62181	0.993776	0.717645	0.447923	0.286495	0.768914	0.454653
GSM2236094	0.505325	0.300495	0.406557	0.332841	0.60326	0.843574	0.601074	0.994492	0.697371	0.452812	0.2624	0.748601	0.504612
GSM2236095	0.508898	0.32352	0.401518	0.311717	0.561929	0.827687	0.597579	0.993722	0.700063	0.414586	0.246948	0.747574	0.523878
