# Supplementary material for: Cross-talk of RNA modification "writers" describes tumor stemness and microenvironment and guides personalized immunotherapy for gastric cancer
Source: Aging (Albany NY). 2023 Jun 14;15(12):5445–81. doi: 10.18632/aging.204802 (PMC10333070; doi:10.18632/aging.204802)
Supplement: Supplementary Table 11 [file aging-15-204802-s012.xlsx]

## Sheet: Sheet1
Supplementary Table 11. The relative enrichment of biological pathways and their representative gene signatures.
EMT1	VIM	TWIST1	ZEB1	ZEB2	SNAI2	CDH1
EMT2	AXL	FAP	LOXL2	ROR2	TAGLN	TWIST2	WNT5A
EMT3	FOXF1	GATA6	SOX9	TWIST1	ZEB1	ZEB2
Pan-F-TBRS	ACTA2	ACTG2	ADAM12	ADAM19	CNN1	COL4A1	CTGF	CTPS1	FAM101B	FSTL3	HSPB1	IGFBP3	PXDC1	SEMA7A	SH3PXD2A	TAGLN	TGFBI	TNS1	TPM1
Angiogenesis	CDH5	SOX17	SOX18	TEK
APM	B2M	HLA-A	HLA-B	HLA-C	TAP1	TAP2
CD8 T effector	CXCL9	CXCL10	CD8A	GZMA	GZMB	IFNG	PRF1	TBX21
p53 signaling pathway	RCHY1	CASP8	PMAIP1	CCNE2	CHEK1	CCNB1	RRM2	APAF1	CHEK2	BID	CCNB2	CDK2	RPRM
Cell cycle	CCNH	MAD2L1	PCNA	ABL1	STAG2	RB1	E2F5	HDAC2	TFDP1	CDK7	SMC3	MYC	CCNE2	CHEK1	CCNB1	RAD21	CCNA2	BUB3	YWHAQ	BUB1	CHEK2	CDC7	YWHAB	CDC23	YWHAE	BUB1B	SKP2	TTK	CDC25C	CCNB2	PTTG1	CDK2	MCM6
Cellular senescence	NBN	RB1	E2F5	MAP2K6	MYC	CCNE2	RAF1	MAPK3	CHEK1	CCNB1	CCNA2	PPID	NFATC4	RRAS	CHEK2	RAD1	LIN9	PIK3CB	NRAS	TSC1	MAPK14	TGFBR1	TGFBR2	LIN54	CCNB2	MYBL2	CDK2	PPP3CB	MRAS
MAPK signaling pathway	CACNB3	MAP2K6	MAPKAPK5	MKNK2	MYC	MAP3K3	RAF1	MAPK3	RPS6KA2	CACNA1H	RRAS	MAPK7	NLK	JUND	FGF4	NRAS	DUSP2	MET	PDGFRB	PDGFC	CHUK	MAPK14	PPP5C	STK3	TNFRSF1A	FGF6	TGFBR1	TGFBR2	IGF1R	GNA12	HSPB1	STMN1	RASGRP2	EFNA5	PPP3CB	NTF3	MRAS
mTOR signaling pathway	TSC2	IGF1	RPS6KA6	MTOR	EIF4B	EIF4E	EIF4EBP1	RICTOR	INS	PGF	ULK1	RHEB	BRAF	HIF1A	PDPK1	RPTOR	AKT1	AKT2	RPS6KA2	RPS6KA3	RPS6KB1	MLST8	AKT3	RPS6KB2	TSC1	ULK2	CAB39	MAPK3	CAB39L	RPS6	MAPK1	RPS6KA1	PIK3R5	ULK3	EIF4E1B	STK11	EIF4E2	VEGFA	PRKAA2	VEGFC	PRKAA1	VEGFB	STRADA	PIK3R3	VEGFD	DDIT4	PIK3CA	PIK3CB	PIK3CD
Notch signaling pathway	HES5	DTX3	NOTCH4	DTX3L	NOTCH3	NOTCH2	EP300	HES1	NOTCH1	NUMB	PSEN2	PSEN1	PTCRA	SNW1	APH1A	KAT2A	ADAM17	RFNG	RBPJ	DTX1	CREBBP	DTX2	MAML1	CTBP2	NCOR2	CTBP1	DVL3	JAG2	DVL2	NUMBL	MAML2	KAT2B	DLL4	PSENEN	DLL3	DVL1	CIR1	DLL1	LFNG	JAG1	MAML3	HDAC1	HDAC2	NCSTN	DTX4	MFNG	RBPJL
T cell receptor signaling pathway	MALT1	DLG1	RAF1	MAPK3	IFNG	MAP2K2	PRKCQ	MAP2K1	MAP2K7	CTLA4	PIK3CB	NA	NRAS	CBLB	CHUK	MAPK14	PAK3	MAP3K14	PPP3CB
TGF-beta signaling pathway	TFDP1	NOG	TNF	GDF7	INHBB	INHBC	COMP	INHBA	THBS4	RHOA	CREBBP	ROCK1	ID1	ID2	RPS6KB1	RPS6KB2	CUL1	SKP1P2	ID4	SMAD3	MAPK3	RBL2	SMAD4	RBL1	NODAL	SMAD1	MYC	SMAD2	MAPK1	SMURF2	SMURF1	EP300	BMP8A	GDF5	SKP1	CHRD	TGFB2	TGFB1	IFNG	CDKN2B	PPP2CB	PPP2CA	PPP2R1A	ID3	SMAD5	RBX1	FST	PITX2	PPP2R1B
ECM receptor interaction	GP1BA	COL6A2	COL6A3	GP1BB	COL5A2	COL6A1	LAMA1	VWF	HSPG2	TNN	FN1	ITGA9	GP9	COMP	IBSP	CD36	CHAD	GP5	VTN	THBS4	ITGA4	ITGA3	ITGA2B	ITGA7	ITGA5	COL5A1	COL4A6	ITGA11	SV2C	COL2A1	COL3A1	COL4A1	AGRN	COL4A2	COL4A4	ITGB3	ITGB4	RELN	ITGB5	ITGB6	ITGB7	LAMC2	ITGAV	ITGB1	LAMB2	SPP1	LAMB3	LAMC1	COL1A1
Rap1 signaling pathway	GNAI3	RAPGEF1	ADCY9	MAP2K6	ADCY4	RAF1	MAPK3	RRAS	RAPGEF3	PIK3CB	FGF4	NRAS	MET	PDGFRB	PDGFC	MAPK14	PARD6B	GNAO1	DRD2	FGF6	GNAI2	GRIN2B	ACTB	IGF1R	EVL	RASGRP2	EFNA5	MRAS
Toll-like receptor signaling pathway	JUN	CD80	CD86	STAT1	TLR9	CCL3	MYD88	CCL5	MAP2K4	CCL4	LBP	RIPK1	TLR6	IKBKB	LY96	MAP3K8	MAP3K7	AKT1	AKT2	CD14	CTSK	AKT3	SPP1	IKBKE	NFKB1	NFKBIA	PIK3R5	TLR5	TIRAP	MAPK14	MAPK12	RELA	TRAF6	TRAF3	TOLLIP	CXCL11	TAB2	TLR7	TLR8	CXCL10	CASP8	TICAM1	CHUK	TNF	IFNA5	IFNA4	IFNA2	FADD	IFNA1
NOD-like receptor signaling pathway	TRIP6	CASP8	CHUK	TAB3	CXCL1	RIPK2	TNF	BIRC3	CCL2	XIAP	CCL5	NOD1	CARD6	CCL13	CCL11	CCL8	CARD8	CCL7	MEFV	CXCL8	MAPK9	MAPK10	MAPK11	ERBIN	MAPK13	CASP5	IKBKB	NOD2	MAP3K7	CASP1	CARD18	TNFAIP3	SUGT1	MAPK3	PSTPIP1	NFKB1	NFKBIB	NFKBIA	MAPK1	IKBKG	CARD9	MAPK8	MAPK14	MAPK12	IL18	RELA	PYDC1	TRAF6	HSP90AA1
C-type lectin receptor signaling pathway	CASP8	MALT1	CLEC4E	RAF1	MAPK3	NFATC4	RRAS	PTPN11	PIK3CB	STAT1	NRAS	CBLB	CHUK	MAPK14	PPP3CB	MRAS
PD-L1 expression and PD-1 checkpoint	MAP2K6	MAP3K3	RAF1	MAPK3	IFNG	PRKCQ	PTPN11	PIK3CB	STAT1	NRAS	CSNK2A1	CHUK	CD274	MAPK14	EML4	PPP3CB
Immune activation	TNF	IFNG	GZMB	CD8A	PRF1	GZMA	CXCL9	CXCL10
Immune checkpoint	PD-L1	CTLA-4	DIDO1	LAG3	HAVCR2	PD-1	PD-L2	CD80	CD86	TNFRSF9
[truncated: 53 more columns]
