# Supplementary material for: Cross-talk of RNA modification "writers" describes tumor stemness and microenvironment and guides personalized immunotherapy for gastric cancer
Source: Aging (Albany NY). 2023 Jun 14;15(12):5445–81. doi: 10.18632/aging.204802 (PMC10333070; doi:10.18632/aging.204802)
Supplement: Supplementary Table 12 [file aging-15-204802-s013.xlsx]

## Sheet: Sheet1
Supplementary Table 12. Analyzing the relative enrichment of biological pathways of patients in the meta-GEO cohort.
Patient ID	EMT1	EMT2	EMT3	Pan-F-TBRS	Angiogenesis	APM	CD8 T effector	p53 signaling pathway	Cell cycle	Cellular senescence	MAPK signaling pathway	mTOR signaling pathway	Notch signaling pathway	T cell receptor signaling pathway	TGF-beta signaling pathway	ECM receptor interaction	Rap1 signaling pathway	Toll-like receptor signaling pathway	NOD-like receptor signaling pathway	C-type lectin receptor signaling pathway	PD-L1 expression and PD-1 checkpoint	Immune activation	Immune checkpoint
GSM387789	0.704976	0.575922	0.723685	0.824717	0.455067	0.945469	0.697235	0.58072	0.768108	0.646343	0.636298	0.631653	0.595456	0.639305	0.581233	0.609866	0.567414	0.596892	0.653524	0.70804	0.741853	0.792595	0.513499
GSM387791	0.666088	0.401166	0.669752	0.706913	0.282216	0.963663	0.824019	0.632106	0.812022	0.645187	0.629205	0.630308	0.622844	0.654096	0.537793	0.515033	0.539403	0.577869	0.622711	0.688815	0.756019	0.885213	0.410167
GSM387792	0.618044	0.602606	0.612251	0.790844	0.427889	0.920775	0.512858	0.673013	0.824229	0.690646	0.639931	0.61721	0.616409	0.664055	0.573259	0.591708	0.56288	0.526494	0.597822	0.707013	0.754731	0.610892	0.3366
GSM387794	0.694274	0.706559	0.558776	0.856091	0.514152	0.887323	0.603189	0.390214	0.653784	0.569235	0.675476	0.63801	0.622982	0.634107	0.626586	0.650634	0.598789	0.55071	0.596446	0.707174	0.714689	0.694494	0.363569
GSM387795	0.470222	0.623041	0.412882	0.840719	0.475197	0.872144	0.506066	0.412467	0.672255	0.581273	0.674198	0.655455	0.581493	0.636769	0.587886	0.609744	0.590311	0.520411	0.590477	0.718856	0.720545	0.58437	0.339449
GSM387796	0.565937	0.429343	0.682389	0.630609	0	0.973688	0.72077	0.583797	0.70776	0.622403	0.600177	0.587666	0.661656	0.660868	0.53242	0.519713	0.537687	0.542238	0.584442	0.691072	0.692447	0.793965	0.317438
GSM387800	0.614881	0.455175	0.660775	0.685575	0.495029	0.936792	0.462843	0.603549	0.753148	0.617178	0.614017	0.614103	0.616333	0.649126	0.550359	0.553501	0.543954	0.531338	0.60989	0.711938	0.74943	0.508426	0.287197
GSM387801	0.520013	0.434062	0.53015	0.695008	0.414283	0.881508	0.532936	0.667539	0.815348	0.66378	0.595862	0.621642	0.588579	0.661262	0.52018	0.553316	0.525619	0.506678	0.604005	0.702802	0.749603	0.619217	0.285273
GSM387802	0.649151	0.50841	0.653409	0.686472	0.426142	1	0.791764	0.669591	0.790911	0.648819	0.640447	0.618161	0.631134	0.667815	0.555733	0.585539	0.554173	0.594196	0.685093	0.707081	0.76235	0.860377	0.374671
GSM387803	0.399769	0.239205	0.491851	0.559106	0.337155	0.920032	0.531836	0.680926	0.840238	0.688696	0.609392	0.585978	0.598387	0.681087	0.50286	0.444013	0.500874	0.519214	0.58663	0.705729	0.77125	0.606498	0.275445
GSM387804	0.630938	0.661219	0.593641	0.836603	0.438651	0.883016	0.582911	0.397788	0.639718	0.57048	0.661116	0.647122	0.581322	0.629638	0.590705	0.603009	0.576847	0.550269	0.594156	0.705081	0.728622	0.672992	0.321017
GSM387805	0.535775	0.2626	0.581132	0.570451	0.282136	0.979231	0.682089	0.735147	0.826161	0.662802	0.599137	0.623107	0.600649	0.672966	0.511553	0.501538	0.552605	0.564588	0.64481	0.716097	0.751076	0.75838	0.392795
GSM387806	0.642264	0.529578	0.643309	0.750235	0.448501	0.952136	0.78112	0.588521	0.739441	0.617155	0.634943	0.610759	0.562602	0.660339	0.550943	0.58126	0.536732	0.582413	0.658497	0.703075	0.735522	0.853212	0.44237
GSM387807	0.658999	0.475405	0.705858	0.668959	0.337639	0.924717	0.272309	0.627735	0.812374	0.659599	0.613702	0.640101	0.619925	0.6324	0.56332	0.575731	0.514747	0.543844	0.64524	0.686276	0.698627	0.27937	0.327758
GSM387808	0.57836	0.541498	0.542357	0.690986	0.329618	0.8419	0.388612	0.716276	0.811458	0.667197	0.615636	0.624137	0.613957	0.636016	0.561402	0.579676	0.506103	0.536778	0.637423	0.692508	0.730919	0.46924	0.33222
GSM387809	0.657857	0.631173	0.640456	0.740777	0.439107	0.932966	0.476212	0.703682	0.815694	0.659945	0.649289	0.615923	0.612974	0.611929	0.565265	0.613982	0.559972	0.522055	0.629464	0.689331	0.703162	0.553666	0.311983
GSM387810	0.591563	0.371182	0.696862	0.602873	0.170483	0.928711	0.567478	0.68318	0.853958	0.707844	0.630935	0.622757	0.621736	0.657627	0.524031	0.507037	0.564202	0.560689	0.62328	0.716177	0.745755	0.683447	0.470667
GSM387811	0.804681	0.635384	0.684037	0.782524	0.397996	0.943084	0.602277	0.697864	0.83242	0.661766	0.664651	0.623881	0.616764	0.6476	0.585594	0.639955	0.553435	0.552491	0.656367	0.712663	0.745024	0.678244	0.373854
GSM387812	0.632578	0.567351	0.615671	0.771486	0.437609	0.977498	0.607027	0.667693	0.799116	0.652649	0.618628	0.617141	0.578839	0.648525	0.574637	0.590687	0.538621	0.571686	0.678179	0.720314	0.74022	0.662709	0.430588
GSM387813	0.597544	0.517221	0.562605	0.659224	0.208528	0.924301	0.621747	0.745003	0.855153	0.672483	0.593598	0.604296	0.589515	0.63068	0.539391	0.561096	0.502639	0.551223	0.645357	0.67232	0.707173	0.697783	0.389395
GSM387814	0.805144	0.61543	0.692638	0.794481	0.41777	0.931395	0.785859	0.602239	0.783905	0.628064	0.650777	0.631532	0.623112	0.663088	0.596459	0.618618	0.568391	0.584448	0.64892	0.702174	0.750145	0.869332	0.469058
GSM387815	0.557536	0.399772	0.621048	0.709714	0.320002	0.922578	0.535001	0.537569	0.739842	0.616273	0.619359	0.623463	0.574396	0.644358	0.558074	0.54365	0.531976	0.515621	0.593353	0.685269	0.711312	0.595947	0.247964
GSM387816	0.576443	0.611687	0.671779	0.830932	0.473527	0.928733	0.822316	0.64986	0.814131	0.673275	0.673196	0.637572	0.615369	0.655315	0.606047	0.635311	0.583054	0.573557	0.613461	0.691698	0.744845	0.908583	0.475477
GSM387817	0.53554	0.469854	0.597151	0.759337	0.51374	0.914125	0.460085	0.596033	0.770909	0.620575	0.604552	0.618335	0.578495	0.661355	0.541576	0.544053	0.527109	0.510419	0.601787	0.665115	0.730165	0.458811	0.262142
GSM387818	0.599828	0.562302	0.61615	0.768949	0.426325	0.858191	0.480424	0.609003	0.793118	0.639262	0.617102	0.611101	0.614773	0.658794	0.554549	0.608575	0.546189	0.521211	0.596963	0.694159	0.709479	0.571851	0.312292
GSM387819	0.821077	0.679861	0.729952	0.842572	0.748159	0.898095	0.564343	0.460029	0.692215	0.581794	0.654695	0.643008	0.637112	0.642331	0.624668	0.649161	0.583601	0.568098	0.647363	0.700061	0.697772	0.63697	0.412293
GSM387820	0.575941	0.545534	0.598875	0.737004	0.468797	0.928499	0.606274	0.622159	0.790856	0.644071	0.640297	0.596542	0.580011	0.650603	0.547333	0.563342	0.547347	0.533179	0.623972	0.696592	0.728079	0.683685	0.352276
GSM387821	0.673982	0.527925	0.675145	0.753174	0.514568	0.890561	0.526727	0.562472	0.755191	0.615603	0.632411	0.643555	0.597983	0.645311	0.588251	0.561574	0.569393	0.524472	0.609339	0.691819	0.721874	0.559934	0.263348
GSM387822	0.733489	0.641907	0.681553	0.743522	0.317934	0.897436	0.44274	0.657676	0.812241	0.653598	0.629004	0.607241	0.609605	0.618523	0.575723	0.629148	0.537018	0.54442	0.626427	0.692679	0.697373	0.511067	0.339152
GSM387823	0.776147	0.672607	0.624628	0.812431	0.316129	0.922492	0.617514	0.695857	0.819701	0.666685	0.64175	0.612452	0.615456	0.624267	0.602578	0.623279	0.551055	0.55366	0.613642	0.693661	0.749573	0.728758	0.46627
GSM387824	0.546217	0.619301	0.441888	0.818035	0.602556	0.888383	0.692917	0.46925	0.693623	0.60246	0.671899	0.642511	0.582948	0.636608	0.603211	0.603958	0.584049	0.573009	0.647273	0.731602	0.737876	0.766218	0.382122
GSM387825	0.661559	0.516858	0.650205	0.736044	0.341466	0.916489	0.586473	0.563062	0.748252	0.618958	0.621422	0.599433	0.614431	0.605976	0.56243	0.576374	0.538367	0.553671	0.59161	0.669942	0.708934	0.653155	0.415834
GSM387826	0.738836	0.61524	0.560568	0.8191	0.533269	0.848104	0.622929	0.349308	0.615783	0.550261	0.651209	0.654199	0.591063	0.643533	0.601773	0.593901	0.57453	0.540801	0.601328	0.703775	0.734861	0.694386	0.341099
GSM387827	0.579323	0.604397	0.479335	0.823036	0.470229	0.890038	0.470458	0.487141	0.712512	0.612792	0.659652	0.635621	0.591954	0.621359	0.572187	0.596838	0.565859	0.538723	0.631529	0.71165	0.715899	0.536538	0.338819
GSM387828	0.64958	0.516689	0.534468	0.68744	0.247577	0.963393	0.803454	0.759743	0.857128	0.686002	0.645462	0.596811	0.593569	0.685953	0.561911	0.593184	0.533689	0.590793	0.6676	0.711489	0.79858	0.885015	0.541798
GSM387829	0.741359	0.521132	0.708537	0.782346	0.579633	0.903659	0.580946	0.42771	0.671042	0.569518	0.636303	0.638465	0.596962	0.630034	0.593161	0.591893	0.565089	0.549936	0.628948	0.69568	0.710721	0.633212	0.301423
GSM387830	0.611106	0.637091	0.544259	0.819455	0.46442	0.915189	0.743584	0.627269	0.778198	0.63295	0.620366	0.618229	0.589221	0.663443	0.577777	0.607222	0.538237	0.567747	0.628151	0.695541	0.741719	0.830465	0.453894
GSM387831	0.548825	0.401653	0.603245	0.693323	0.117142	0.932591	0.590887	0.693279	0.838861	0.658474	0.608211	0.603096	0.574219	0.610673	0.555966	0.515938	0.500699	0.550614	0.642707	0.675062	0.729527	0.692126	0.430605
GSM387832	0.818534	0.568727	0.670422	0.815413	0.677404	0.903052	0.51793	0.380074	0.629484	0.54869	0.650978	0.670068	0.646785	0.622122	0.608588	0.595071	0.599518	0.536689	0.619636	0.694974	0.695568	0.595631	0.312164
GSM387833	0.671941	0.606167	0.72459	0.794017	0.357223	0.882682	0.455848	0.583788	0.762713	0.621048	0.625431	0.616325	0.638601	0.602072	0.580606	0.631669	0.536342	0.513187	0.565239	0.705208	0.704773	0.549083	0.296305
GSM387834	0.743398	0.633232	0.710914	0.839117	0.626348	0.851557	0.544539	0.50041	0.721087	0.599291	0.646039	0.653771	0.619564	0.623373	0.613713	0.64413	0.569295	0.550115	0.614324	0.698303	0.707975	0.636084	0.372554
GSM387835	0.567825	0.603121	0.6331	0.77735	0.43277	0.962989	0.838863	0.685289	0.800607	0.67094	0.620528	0.616539	0.590724	0.667403	0.579406	0.609568	0.55991	0.617102	0.653428	0.746921	0.769371	0.907797	0.534516
GSM387836	0.664727	0.538087	0.652896	0.800872	0.399256	0.906444	0.482184	0.567069	0.735465	0.632194	0.62421	0.61215	0.588979	0.652181	0.586282	0.601199	0.556048	0.536992	0.601607	0.712306	0.741069	0.564803	0.323164
GSM387837	0.605874	0.607594	0.614874	0.83584	0.456364	0.903808	0.493315	0.585638	0.757739	0.636497	0.6497	0.626233	0.621997	0.642653	0.608037	0.631073	0.566598	0.541668	0.59872	0.725735	0.73682	0.570234	0.346275
GSM387838	0.551822	0.65091	0.400392	0.85331	0.648819	0.867102	0.518288	0.410011	0.632947	0.566892	0.673954	0.660427	0.599687	0.640546	0.617184	0.632746	0.579271	0.564382	0.65258	0.716528	0.726515	0.591071	0.357409
GSM387839	0.582697	0.505835	0.609562	0.712237	0.376199	0.948979	0.760469	0.677093	0.814481	0.659586	0.615176	0.613319	0.58304	0.66728	0.542674	0.591441	0.526255	0.574267	0.634806	0.691514	0.747635	0.849108	0.432199
GSM387840	0.550987	0.626965	0.422004	0.855517	0.670784	0.861355	0.551257	0.314834	0.615411	0.559548	0.669901	0.652022	0.614587	0.64324	0.60256	0.624172	0.588847	0.528989	0.592201	0.716305	0.711939	0.601833	0.32436
GSM387841	0.617546	0.670235	0.494348	0.818658	0.574966	0.912363	0.679796	0.428462	0.672283	0.566304	0.655616	0.668539	0.618657	0.649967	0.633872	0.631112	0.545801	0.60968	0.653152	0.680431	0.717953	0.760644	0.447652
GSM387842	0.52765	0.539013	0.583525	0.802625	0.421926	0.94106	0.637087	0.687041	0.81681	0.653822	0.646027	0.600422	0.591809	0.645469	0.598364	0.614551	0.546204	0.54954	0.59303	0.699817	0.745398	0.738549	0.465616
GSM387843	0.621374	0.504367	0.564949	0.671472	0.288561	0.854953	0.530797	0.647932	0.833451	0.671376	0.642303	0.598984	0.605587	0.620457	0.586997	0.541786	0.523045	0.516111	0.538174	0.695609	0.73778	0.650367	0.413274
GSM387845	0.67007	0.634408	0.684061	0.810143	0.466637	0.918448	0.538731	0.59813	0.771463	0.622938	0.640888	0.599636	0.600666	0.645071	0.587296	0.647747	0.556993	0.556592	0.609269	0.703577	0.722006	0.650874	0.355543
GSM387846	0.679032	0.623184	0.593453	0.760513	0.345073	0.963654	0.686516	0.67175	0.794593	0.644063	0.619247	0.607177	0.595201	0.639532	0.577526	0.64015	0.522335	0.583418	0.659113	0.687812	0.71413	0.775436	0.432838
GSM387847	0.707299	0.589571	0.636465	0.837187	0.883996	0.887902	0.603804	0.310767	0.596908	0.549891	0.684415	0.664459	0.662086	0.638856	0.638403	0.594851	0.617987	0.559411	0.627793	0.727244	0.700048	0.626891	0.321493
GSM387848	0.746717	0.573083	0.717212	0.787143	0.589167	0.927055	0.74901	0.50033	0.691182	0.577918	0.619838	0.621831	0.588893	0.636457	0.582149	0.615129	0.547502	0.584087	0.652972	0.681197	0.710688	0.823621	0.37436
GSM387849	0.801981	0.649674	0.704467	0.825909	0.559495	0.911527	0.576372	0.490176	0.717766	0.60179	0.639231	0.646575	0.63472	0.633291	0.582817	0.621234	0.565272	0.564188	0.657476	0.715974	0.719535	0.636883	0.322685
GSM387850	0.773198	0.649546	0.645076	0.853024	0.701229	0.904419	0.63706	0.414341	0.623301	0.533468	0.653316	0.661782	0.623341	0.645885	0.610542	0.654018	0.586325	0.570953	0.643986	0.701134	0.70963	0.718148	0.400987
GSM387851	0.620782	0.67785	0.588465	0.854825	0.468185	0.905908	0.541213	0.499078	0.690534	0.606877	0.645662	0.639019	0.621557	0.658607	0.589156	0.642764	0.569627	0.564578	0.609797	0.726617	0.727964	0.610068	0.383903
GSM387852	0.755601	0.641642	0.721835	0.787861	0.58148	0.874887	0.453061	0.472	0.708401	0.599584	0.639626	0.626765	0.61562	0.620574	0.601019	0.620211	0.562263	0.535619	0.624101	0.67224	0.687712	0.455291	0.319637
GSM387853	0.69342	0.615794	0.528649	0.855093	0.609044	0.881441	0.588733	0.389902	0.638301	0.579965	0.675027	0.656982	0.605916	0.638309	0.598106	0.616754	0.591202	0.550728	0.611198	0.71956	0.714218	0.658321	0.366579
GSM387854	0.524361	0.440659	0.554895	0.730693	0.40221	0.899276	0.553474	0.747866	0.879622	0.667642	0.622488	0.599068	0.619978	0.585991	0.564261	0.485202	0.488876	0.479143	0.504268	0.603039	0.680969	0.661456	0.344199
GSM387855	0.548875	0.483311	0.574515	0.681695	0.379995	0.813429	0.325463	0.685891	0.830566	0.683176	0.630228	0.609742	0.597468	0.674209	0.580931	0.556329	0.52714	0.518338	0.577731	0.709453	0.730548	0.397707	0.249682
GSM387856	0.854995	0.75564	0.734876	0.831136	0.371906	0.900684	0.633852	0.580519	0.764229	0.629605	0.642982	0.612953	0.615736	0.623674	0.596845	0.649835	0.548022	0.58685	0.687842	0.699071	0.713835	0.736726	0.391704
GSM387857	0.731501	0.631849	0.662644	0.863401	0.667613	0.896229	0.468607	0.404425	0.652899	0.571116	0.674752	0.654919	0.661361	0.635414	0.624749	0.652702	0.599699	0.54141	0.618761	0.705287	0.707348	0.527544	0.364918
GSM387858	0.784911	0.65498	0.697069	0.789409	0.538297	0.913306	0.595181	0.571568	0.752793	0.605652	0.638909	0.621046	0.628904	0.602933	0.611216	0.6295	0.573878	0.546338	0.568767	0.673168	0.704028	0.682531	0.410246
GSM387859	0.679257	0.769258	0.492139	0.835749	0.666915	0.951069	0.834696	0.559387	0.75439	0.638041	0.646248	0.652269	0.626816	0.659656	0.592747	0.648953	0.575137	0.618021	0.668209	0.729058	0.732442	0.8929	0.487837
GSM387860	0.68572	0.562826	0.701998	0.791694	0.432949	0.960124	0.749247	0.494676	0.665035	0.557009	0.624947	0.615906	0.603999	0.636702	0.576678	0.627937	0.562273	0.592905	0.653547	0.677333	0.705794	0.832189	0.485483
GSM387861	0.59202	0.544622	0.619331	0.712474	0.280026	0.905688	0.50374	0.673528	0.794432	0.647537	0.61726	0.587228	0.572557	0.652955	0.554879	0.576274	0.539333	0.557905	0.59875	0.69728	0.744913	0.594677	0.435599
GSM387862	0.767115	0.723522	0.655239	0.854404	0.677893	0.90314	0.646245	0.44175	0.670599	0.578463	0.664821	0.643512	0.64198	0.632604	0.622516	0.667449	0.595018	0.569476	0.65873	0.706676	0.713785	0.74296	0.37155
GSM387863	0.706222	0.783373	0.510978	0.884767	0.76953	0.909485	0.538817	0.48338	0.705878	0.606308	0.668262	0.647675	0.634421	0.627779	0.619317	0.673188	0.590488	0.560668	0.665812	0.717546	0.699521	0.568428	0.341345
GSM387864	0.675252	0.611583	0.673015	0.81486	0.530201	0.955611	0.629717	0.604675	0.746471	0.605252	0.617228	0.61762	0.630122	0.619611	0.592619	0.638111	0.553912	0.568661	0.609874	0.647504	0.677498	0.700774	0.319104
GSM387865	0.633273	0.59368	0.620468	0.806733	0.407885	0.907222	0.351976	0.635567	0.830479	0.676151	0.63276	0.618159	0.616169	0.638028	0.565194	0.610873	0.548878	0.536713	0.589588	0.700403	0.716316	0.410116	0.369624
GSM387866	0.872842	0.642447	0.742793	0.802134	0.764365	0.898071	0.614272	0.453944	0.672757	0.566603	0.648694	0.650995	0.646371	0.637678	0.610739	0.645798	0.584874	0.577537	0.623504	0.69611	0.716368	0.693427	0.329314
GSM387867	0.639692	0.59473	0.618113	0.751479	0.583339	0.90499	0.414354	0.60808	0.788564	0.640435	0.636042	0.612758	0.591636	0.616203	0.579533	0.604055	0.540971	0.52617	0.616432	0.670884	0.711086	0.480199	0.360473
GSM387868	0.838145	0.797236	0.665812	0.872741	0.732619	0.926667	0.652625	0.534454	0.716756	0.607959	0.660539	0.639842	0.637409	0.647722	0.602684	0.668591	0.588758	0.604006	0.68794	0.736301	0.725166	0.756733	0.448079
GSM387869	0.634441	0.6008	0.591258	0.838067	0.406226	0.91408	0.576032	0.490569	0.717118	0.606596	0.644488	0.61761	0.599792	0.635336	0.595323	0.615558	0.555193	0.529205	0.602456	0.682375	0.726645	0.664989	0.347226
GSM387870	0.637494	0.599283	0.591377	0.836167	0.457047	0.940597	0.584522	0.577227	0.745723	0.621887	0.657466	0.62098	0.598894	0.636687	0.580747	0.657123	0.590891	0.562405	0.631085	0.697877	0.713478	0.673099	0.331369
GSM387871	0.557171	0.494126	0.613852	0.729825	0.480255	0.920056	0.592305	0.609301	0.802158	0.656795	0.627308	0.63018	0.600819	0.641923	0.562076	0.57006	0.52235	0.539212	0.617258	0.691333	0.723902	0.671952	0.341085
GSM387872	0.631852	0.569038	0.618174	0.751949	0.450673	0.914051	0.481614	0.63141	0.792439	0.644948	0.628192	0.59685	0.591128	0.611074	0.565408	0.581891	0.523246	0.544443	0.613169	0.668881	0.718262	0.54648	0.340881
GSM387873	0.647576	0.338607	0.676811	0.71263	0.530305	0.944134	0.759215	0.607802	0.769814	0.604404	0.624886	0.615461	0.625484	0.634212	0.530864	0.536098	0.555554	0.544914	0.62576	0.676971	0.712676	0.806943	0.338103
GSM387874	0.765317	0.694435	0.68872	0.863745	0.531066	0.927662	0.503317	0.547096	0.716949	0.594864	0.658764	0.615008	0.636184	0.612423	0.590098	0.664854	0.573364	0.552501	0.656659	0.713053	0.702079	0.616157	0.367681
GSM387875	0.672725	0.621175	0.559727	0.837972	0.557726	0.893931	0.618734	0.543128	0.745654	0.626316	0.657773	0.632499	0.5874	0.622162	0.575231	0.629359	0.574899	0.544272	0.613275	0.700874	0.711088	0.708185	0.379391
GSM387876	0.779036	0.641865	0.751335	0.822028	0.559257	0.899565	0.736179	0.465732	0.701714	0.58906	0.646949	0.654547	0.627426	0.661355	0.61007	0.606347	0.568735	0.579343	0.612588	0.696945	0.728468	0.813698	0.419577
GSM387877	0.726738	0.625189	0.698303	0.736421	0.538182	0.974015	0.89539	0.660862	0.794825	0.655312	0.653455	0.610999	0.610904	0.670261	0.574205	0.605641	0.573056	0.615218	0.67022	0.701065	0.76852	0.959597	0.587434
GSM387878	0.757709	0.567685	0.72982	0.835511	0.499188	0.872914	0.31939	0.491366	0.697797	0.59056	0.642739	0.654397	0.642503	0.647102	0.576928	0.616844	0.579802	0.511428	0.6144	0.716425	0.714541	0.341173	0.200949
GSM387879	0.570231	0.547268	0.62891	0.765539	0.378734	0.906706	0.575181	0.513311	0.696357	0.574756	0.608798	0.624145	0.591157	0.625106	0.560335	0.5759	0.550807	0.538124	0.632021	0.682555	0.689863	0.639325	0.280598
GSM387880	0.82788	0.66962	0.737237	0.816554	0.536438	0.883316	0.549843	0.386267	0.643404	0.563562	0.635007	0.654059	0.619902	0.629857	0.609322	0.620714	0.582668	0.535411	0.601125	0.711184	0.713379	0.611287	0.31064
GSM387881	0.740225	0.655322	0.748893	0.832623	0.55215	0.884824	0.346952	0.514665	0.730313	0.608616	0.653815	0.616009	0.632576	0.624485	0.594346	0.651014	0.593034	0.501969	0.580742	0.698287	0.698106	0.391064	0.274725
GSM387882	0.60791	0.550273	0.634965	0.79773	0.383032	0.917773	0.441636	0.59045	0.766091	0.633234	0.62221	0.606618	0.638802	0.635606	0.573345	0.612906	0.543031	0.539156	0.643887	0.68216	0.711957	0.474494	0.302854
GSM387883	0.588336	0.473646	0.633339	0.712142	0.511174	0.902785	0.645177	0.609001	0.755963	0.622861	0.610843	0.616284	0.607736	0.641963	0.536788	0.567549	0.536328	0.548914	0.625123	0.685737	0.725468	0.738133	0.378562
GSM387884	0.601849	0.500033	0.596222	0.734629	0.412038	0.915996	0.561187	0.588904	0.731226	0.601146	0.622482	0.6144	0.586323	0.644621	0.579085	0.572387	0.561467	0.546005	0.621904	0.702526	0.723128	0.5906	0.29713
GSM387885	0.628526	0.39322	0.591677	0.7485	0.578647	0.94824	0.590853	0.500609	0.7095	0.589284	0.617463	0.632302	0.626254	0.687	0.556692	0.557113	0.548787	0.550161	0.604133	0.71758	0.746443	0.693736	0.360645
GSM387886	0.678092	0.593041	0.65399	0.730036	0.449847	0.957651	0.749494	0.576111	0.733779	0.6018	0.624355	0.609163	0.608289	0.64147	0.566751	0.613801	0.556205	0.583367	0.66143	0.70101	0.721392	0.834643	0.456118
GSM387887	0.681793	0.580272	0.699806	0.773634	0.47141	0.914534	0.725458	0.505682	0.690833	0.582564	0.636277	0.615294	0.597501	0.643197	0.600988	0.596845	0.557727	0.579445	0.648102	0.688661	0.709108	0.80643	0.429362
GSM387888	0.782286	0.662599	0.770433	0.827986	0.625991	0.916576	0.373235	0.412476	0.689424	0.573635	0.644515	0.629763	0.64505	0.605948	0.601436	0.641124	0.565852	0.506383	0.581824	0.679111	0.671031	0.43751	0.290139
GSM387889	0.739704	0.660541	0.677092	0.817131	0.593734	0.910877	0.594518	0.612503	0.772252	0.62573	0.660496	0.611362	0.61616	0.629737	0.611712	0.651834	0.576425	0.546784	0.660075	0.697817	0.702916	0.662207	0.328167
GSM387890	0.489414	0.4446	0.431862	0.609348	0.29232	0.939095	0.517354	0.695525	0.848304	0.663905	0.607567	0.60777	0.636376	0.660663	0.517851	0.532481	0.503956	0.526128	0.602582	0.690794	0.737822	0.565527	0.397538
GSM387891	0.595958	0.439829	0.629117	0.713437	0.448197	0.896515	0.67624	0.534612	0.690912	0.572251	0.620032	0.622204	0.565063	0.649631	0.560592	0.526299	0.533938	0.547871	0.609792	0.687513	0.740049	0.757436	0.365976
GSM387892	0.71146	0.715345	0.66652	0.842508	0.365633	0.940907	0.442869	0.588008	0.741243	0.620727	0.635309	0.591097	0.614313	0.612592	0.61506	0.655392	0.560345	0.526911	0.573081	0.673281	0.687625	0.542078	0.307224
GSM387893	0.677821	0.572954	0.661438	0.773697	0.65314	0.875724	0.417114	0.435693	0.672297	0.561793	0.636483	0.639297	0.611766	0.62909	0.585528	0.594716	0.547362	0.526532	0.62738	0.677202	0.689754	0.397591	0.27349
GSM387894	0.476715	0.38325	0.562422	0.651821	0.466237	0.912443	0.576661	0.717757	0.805893	0.640211	0.610195	0.592307	0.60032	0.666631	0.538849	0.554697	0.519014	0.546131	0.637223	0.719953	0.7793	0.626517	0.381563
GSM387895	0.682503	0.553756	0.702068	0.726099	0.295274	0.898976	0.670653	0.611327	0.769264	0.623021	0.619209	0.605397	0.572945	0.626181	0.568084	0.586211	0.546401	0.558159	0.654463	0.68592	0.703437	0.764021	0.413732
GSM387896	0.567748	0.502964	0.573198	0.781364	0.476607	0.937078	0.415466	0.650737	0.800758	0.658401	0.630176	0.600084	0.598343	0.618423	0.561506	0.618046	0.554823	0.53804	0.626611	0.701439	0.703699	0.460683	0.347625
GSM387897	0.596749	0.451567	0.610092	0.716246	0.40079	0.906049	0.593388	0.504057	0.734599	0.608898	0.623115	0.617115	0.58996	0.643107	0.560417	0.561673	0.547546	0.537243	0.597968	0.693849	0.714516	0.694593	0.313574
GSM387898	0.640136	0.634499	0.534409	0.849975	0.478408	0.850294	0.566167	0.410532	0.67355	0.589546	0.674354	0.661937	0.594936	0.649538	0.6052	0.643001	0.592234	0.549626	0.615094	0.716405	0.720349	0.634442	0.36338
GSM387899	0.657911	0.636187	0.659057	0.837707	0.627965	0.858695	0.443155	0.47873	0.717618	0.600845	0.643982	0.647655	0.640966	0.608795	0.606692	0.635705	0.581011	0.509412	0.604373	0.682882	0.697252	0.50508	0.264455
GSM387900	0.540694	0.446218	0.572955	0.737137	0.440294	0.912926	0.625791	0.559544	0.732295	0.603487	0.604445	0.610372	0.579146	0.642896	0.547517	0.54099	0.524221	0.528408	0.62736	0.671686	0.705924	0.665423	0.302798
GSM387901	0.543973	0.368592	0.597142	0.617415	0.402672	0.924669	0.352192	0.668115	0.803428	0.646995	0.614764	0.583107	0.617662	0.579051	0.525404	0.53325	0.495954	0.480021	0.57146	0.637084	0.66795	0.401412	0.190022
GSM387902	0.617032	0.526313	0.61689	0.798453	0.366461	0.904272	0.644704	0.465494	0.672933	0.580637	0.620055	0.618246	0.613599	0.640794	0.568535	0.580947	0.558607	0.535379	0.603558	0.673404	0.702926	0.72154	0.270315
GSM387903	0.50701	0.360248	0.548442	0.612761	0.386427	0.916725	0.355259	0.717254	0.862377	0.669522	0.625571	0.576686	0.605086	0.614245	0.556168	0.513864	0.477787	0.479877	0.541163	0.680965	0.689453	0.379185	0.213637
GSM387904	0.626803	0.525405	0.604091	0.672526	0.391766	0.898993	0.487624	0.658456	0.816776	0.64603	0.61104	0.600587	0.615062	0.59389	0.565968	0.564058	0.503971	0.532014	0.570603	0.668259	0.699515	0.574856	0.341306
GSM387905	0.763308	0.68176	0.654292	0.82415	0.533824	0.907742	0.634402	0.563743	0.745333	0.612884	0.642607	0.636573	0.586765	0.635698	0.588626	0.635653	0.570517	0.579751	0.644948	0.704079	0.717066	0.718375	0.423274
GSM387906	0.643711	0.629109	0.651181	0.814211	0.562458	0.870706	0.536589	0.541519	0.749091	0.613107	0.628067	0.621897	0.601449	0.608065	0.602824	0.621965	0.556635	0.519708	0.620467	0.682819	0.688037	0.575951	0.245491
GSM387907	0.538	0.413942	0.612012	0.708692	0.476117	0.921314	0.352685	0.529009	0.722905	0.604083	0.588891	0.618569	0.613691	0.630958	0.520038	0.551616	0.516071	0.538447	0.606237	0.68607	0.707613	0.418047	0.322095
GSM387908	0.725443	0.658049	0.706733	0.782202	0.303986	0.909375	0.473971	0.680479	0.824253	0.655429	0.632797	0.596101	0.573817	0.62124	0.56847	0.611692	0.541695	0.555995	0.644992	0.684279	0.703715	0.550609	0.402703
GSM387909	0.585591	0.644841	0.645064	0.815366	0.524317	0.85978	0.462632	0.477273	0.697357	0.591269	0.652472	0.638226	0.609361	0.603188	0.587143	0.623975	0.570532	0.522426	0.587519	0.677559	0.69538	0.514857	0.307017
GSM387910	0.622245	0.587014	0.605763	0.79101	0.534944	0.914085	0.624417	0.559573	0.747998	0.607418	0.628844	0.600735	0.579509	0.632457	0.561494	0.592764	0.552073	0.529035	0.605662	0.681468	0.700714	0.714541	0.288164
GSM387911	0.781978	0.597911	0.717791	0.759376	0.446232	0.912766	0.677109	0.617322	0.76083	0.621527	0.648797	0.627425	0.596627	0.638262	0.583646	0.616677	0.569138	0.572746	0.612408	0.69529	0.721898	0.75845	0.465396
GSM387912	0.636916	0.565712	0.606032	0.767347	0.505144	0.920175	0.49214	0.572526	0.733619	0.617105	0.632812	0.610573	0.592294	0.631562	0.571433	0.607024	0.55767	0.527979	0.621948	0.683121	0.707929	0.536593	0.338722
GSM387913	0.530297	0.424326	0.587032	0.68702	0.313184	0.899735	0.540052	0.69794	0.813983	0.664592	0.630825	0.595455	0.588998	0.638433	0.52689	0.528676	0.489909	0.515846	0.600351	0.679079	0.731317	0.621478	0.312794
GSM387914	0.688345	0.614721	0.632916	0.821042	0.324539	0.90472	0.374179	0.684409	0.809634	0.66067	0.620317	0.595346	0.596984	0.614883	0.571886	0.635599	0.537696	0.533244	0.596673	0.721655	0.711292	0.435668	0.360715
GSM387915	0.664578	0.598553	0.614082	0.825962	0.539276	0.926828	0.747434	0.575167	0.747782	0.617289	0.646804	0.629525	0.600828	0.6553	0.566209	0.627308	0.574064	0.571657	0.628556	0.711891	0.732367	0.835213	0.432426
GSM387916	0.522136	0.412561	0.593699	0.709608	0.308567	0.930683	0.486055	0.625785	0.775813	0.629075	0.600995	0.615253	0.626247	0.612319	0.543358	0.517998	0.533662	0.517223	0.582897	0.657187	0.706405	0.56038	0.269474
GSM387917	0.579635	0.50906	0.648502	0.669101	0.286939	0.900117	0.467249	0.638521	0.758048	0.628489	0.612031	0.598352	0.58841	0.627507	0.565805	0.579584	0.530562	0.524867	0.602041	0.664068	0.687578	0.536457	0.313375
GSM387918	0.573526	0.529953	0.605722	0.76431	0.528302	0.908464	0.394638	0.598817	0.737519	0.607899	0.644935	0.624221	0.623191	0.646864	0.572684	0.597921	0.558409	0.518132	0.643332	0.692224	0.711022	0.42347	0.236994
GSM387919	0.632758	0.56278	0.639904	0.818318	0.45112	0.917066	0.557046	0.557434	0.735015	0.61435	0.641401	0.613266	0.607165	0.631312	0.593681	0.632353	0.570808	0.571997	0.61516	0.702151	0.720513	0.653525	0.395902
GSM387920	0.535191	0.498041	0.553906	0.729155	0.404928	0.922184	0.454185	0.674608	0.830645	0.666672	0.621239	0.587839	0.587322	0.637241	0.560881	0.544312	0.523531	0.507345	0.61063	0.709891	0.721507	0.517484	0.270014
GSM387921	0.568032	0.538148	0.55596	0.714483	0.451668	0.93909	0.659393	0.683026	0.828959	0.67838	0.622861	0.60348	0.612547	0.650816	0.543746	0.553398	0.526906	0.554436	0.629324	0.694992	0.73327	0.755124	0.419179
GSM387922	0.589281	0.514996	0.577939	0.656704	0.249604	0.960631	0.71643	0.772749	0.890879	0.703828	0.602868	0.600116	0.594021	0.641431	0.520906	0.539318	0.496997	0.570559	0.640164	0.675942	0.732663	0.811543	0.458298
GSM387923	0.549009	0.556215	0.574491	0.783096	0.421435	0.890082	0.394446	0.510938	0.719234	0.597099	0.627105	0.607234	0.62394	0.596958	0.573162	0.599498	0.557764	0.521092	0.572129	0.662355	0.668582	0.492335	0.298849
GSM387924	0.587302	0.556006	0.599372	0.778686	0.513044	0.923994	0.610062	0.597164	0.771792	0.623916	0.627409	0.612209	0.600739	0.627841	0.56744	0.6076	0.555561	0.535489	0.613044	0.686483	0.709433	0.691447	0.33277
GSM387925	0.650583	0.64965	0.637664	0.799469	0.578185	0.887294	0.571551	0.532312	0.731447	0.605612	0.637833	0.633777	0.619911	0.622334	0.608761	0.638638	0.569327	0.544973	0.627294	0.682938	0.700451	0.63732	0.336614
GSM387926	0.558745	0.482358	0.58177	0.7111	0.236363	0.939653	0.615244	0.691814	0.811312	0.649103	0.617664	0.599581	0.571307	0.649385	0.547224	0.569518	0.52065	0.547423	0.603582	0.70464	0.755783	0.716911	0.423262
GSM387927	0.708848	0.691714	0.697494	0.795306	0.313944	0.993265	0.823495	0.697342	0.809706	0.650999	0.644388	0.607719	0.576841	0.674357	0.570735	0.619431	0.533333	0.599206	0.672329	0.700837	0.737773	0.911631	0.566517
GSM387928	0.63235	0.463766	0.572526	0.651258	0.410983	0.978987	0.868589	0.722615	0.854409	0.685521	0.636248	0.6289	0.595517	0.677227	0.540574	0.589451	0.564759	0.609592	0.673521	0.697314	0.781409	0.943258	0.564386
GSM387929	0.658205	0.682633	0.61384	0.843445	0.561578	0.897648	0.519145	0.49855	0.730072	0.599737	0.666587	0.631351	0.606037	0.633991	0.600684	0.617323	0.566675	0.574187	0.661488	0.703948	0.709842	0.610556	0.362754
GSM387930	0.586596	0.458105	0.598261	0.676562	0.282863	0.928939	0.7632	0.708474	0.835929	0.677312	0.622362	0.607535	0.563266	0.68841	0.528942	0.549269	0.537253	0.583339	0.657921	0.686087	0.766937	0.858563	0.50098
GSM387931	0.718424	0.727838	0.540017	0.873632	0.745334	0.918284	0.436902	0.49275	0.692478	0.597882	0.672686	0.675256	0.641651	0.648372	0.605858	0.644618	0.595665	0.562025	0.644799	0.722223	0.714326	0.465031	0.367403
GSM387932	0.511754	0.412155	0.458683	0.666025	0.194664	0.89406	0.495523	0.751267	0.866234	0.678966	0.60393	0.615298	0.574178	0.618441	0.519259	0.492151	0.491048	0.521029	0.599214	0.639804	0.70175	0.576314	0.316574
GSM387933	0.670655	0.624503	0.592103	0.782543	0.434758	0.896013	0.659085	0.536809	0.743888	0.616594	0.627568	0.610006	0.573153	0.632932	0.58243	0.587542	0.545014	0.538038	0.616832	0.679868	0.703565	0.72721	0.361564
GSM387934	0.685603	0.59307	0.636632	0.740181	0.452195	0.923931	0.687419	0.624541	0.757532	0.617027	0.629446	0.629476	0.609704	0.644234	0.57235	0.614515	0.542291	0.558622	0.626982	0.691777	0.72718	0.761471	0.426201
GSM387935	0.586347	0.534406	0.615477	0.768285	0.414316	0.925216	0.630228	0.588941	0.708661	0.59574	0.62466	0.610437	0.593727	0.665064	0.541507	0.584319	0.566399	0.556611	0.623273	0.704636	0.733146	0.683452	0.339513
GSM387936	0.75795	0.719682	0.754987	0.868937	0.811757	0.919134	0.63106	0.414244	0.642491	0.556762	0.665465	0.662142	0.634746	0.62419	0.626432	0.64236	0.587074	0.581317	0.656784	0.722253	0.705045	0.679516	0.395706
GSM387938	0.559697	0.535126	0.617366	0.782703	0.471792	0.888217	0.662671	0.601826	0.744995	0.617395	0.621336	0.604156	0.572558	0.633825	0.574016	0.566519	0.540911	0.534744	0.626567	0.698298	0.714059	0.735578	0.215578
GSM387939	0.507785	0.408821	0.557437	0.69432	0.382768	0.885689	0.503408	0.631479	0.7558	0.634798	0.611574	0.600803	0.576112	0.631402	0.555549	0.520813	0.51636	0.514898	0.604585	0.663603	0.692213	0.530141	0.290629
GSM387940	0.619839	0.546754	0.663537	0.820592	0.491775	0.917188	0.6826	0.494502	0.687352	0.595352	0.656884	0.633655	0.589189	0.644646	0.592881	0.617316	0.552792	0.570169	0.632852	0.712239	0.735063	0.771719	0.378426
GSM387941	0.536857	0.483002	0.536225	0.70618	0.367731	0.947317	0.633666	0.63861	0.78386	0.641519	0.616021	0.599265	0.565409	0.658683	0.543756	0.57307	0.505693	0.577738	0.671706	0.706424	0.752029	0.730327	0.517939
GSM387942	0.56568	0.57166	0.595093	0.841667	0.514431	0.873011	0.396117	0.604273	0.798063	0.660533	0.652944	0.613489	0.602312	0.648366	0.610837	0.626512	0.561747	0.527713	0.595035	0.697985	0.743637	0.448089	0.267702
GSM387943	0.60195	0.560738	0.714675	0.837454	0.480607	0.922082	0.575022	0.540814	0.765947	0.655412	0.660782	0.648583	0.587518	0.647413	0.584655	0.617251	0.576269	0.539231	0.595468	0.726732	0.749313	0.667375	0.318989
GSM387944	0.558707	0.378396	0.621839	0.701693	0.32948	0.924386	0.541428	0.643362	0.800177	0.630038	0.608182	0.602979	0.58418	0.60755	0.547571	0.522443	0.518432	0.536034	0.606905	0.664376	0.695422	0.636796	0.281986
GSM387945	0.731951	0.67522	0.671212	0.798996	0.426684	0.949112	0.524845	0.670935	0.826655	0.667718	0.651022	0.601057	0.591632	0.610539	0.586579	0.638665	0.55418	0.560492	0.657637	0.697271	0.706326	0.605525	0.42986
GSM387946	0.746313	0.584432	0.711871	0.795912	0.589757	0.927027	0.722759	0.595189	0.780274	0.636926	0.642698	0.617443	0.604015	0.631154	0.581867	0.611349	0.554888	0.565126	0.64125	0.704456	0.708442	0.806584	0.387049
GSM387947	0.728251	0.587527	0.698881	0.807945	0.500532	0.910216	0.666757	0.564496	0.729995	0.615865	0.652993	0.619561	0.608347	0.632075	0.584663	0.637117	0.567138	0.561048	0.643862	0.702754	0.7216	0.746804	0.428806
GSM387948	0.625025	0.520168	0.648084	0.753386	0.426381	0.927905	0.682448	0.634489	0.782892	0.635148	0.62362	0.59199	0.581354	0.611614	0.5648	0.57086	0.525416	0.545973	0.627025	0.671261	0.70463	0.745449	0.378869
GSM387949	0.50798	0.427413	0.521626	0.667376	0.318126	0.961762	0.506442	0.689919	0.815175	0.651816	0.617865	0.584053	0.588426	0.618634	0.541686	0.513934	0.50439	0.529405	0.596998	0.656284	0.703963	0.56793	0.32897
GSM387950	0.685899	0.561178	0.626069	0.841304	0.526919	0.946125	0.770496	0.487105	0.692587	0.607949	0.672223	0.647158	0.625412	0.663263	0.599833	0.635599	0.599432	0.560218	0.610823	0.727326	0.74484	0.859577	0.466884
GSM387951	0.483465	0.263906	0.545225	0.656141	0.302597	0.950163	0.58855	0.641991	0.766138	0.622796	0.613972	0.587395	0.57246	0.627952	0.533238	0.542426	0.536471	0.512954	0.582556	0.674155	0.70746	0.633195	0.238214
GSM387952	0.584924	0.562149	0.594437	0.71023	0.290029	0.964489	0.745769	0.698749	0.823375	0.664582	0.602122	0.608519	0.59995	0.670963	0.566017	0.597376	0.547636	0.558255	0.609846	0.681027	0.751534	0.80844	0.426164
GSM387953	0.679195	0.526496	0.670354	0.791692	0.438837	0.959825	0.777803	0.543943	0.662505	0.618489	0.646068	0.617495	0.566635	0.672658	0.56328	0.606814	0.590256	0.606712	0.64219	0.735353	0.734913	0.838167	0.524204
GSM387954	0.717253	0.691784	0.66267	0.833933	0.469361	0.910498	0.519224	0.59205	0.705398	0.599989	0.638245	0.605364	0.63941	0.637435	0.590033	0.639841	0.566181	0.541936	0.599281	0.701755	0.707378	0.593163	0.40298
GSM387955	0.609328	0.584313	0.553303	0.803007	0.500879	0.934174	0.448515	0.592961	0.742626	0.618615	0.654749	0.619552	0.613958	0.615083	0.586101	0.628726	0.583293	0.523976	0.594397	0.677133	0.700002	0.479635	0.304738
GSM387956	0.604649	0.507983	0.581848	0.794679	0.484424	0.893188	0.23583	0.565329	0.714339	0.620063	0.618669	0.641925	0.635207	0.639585	0.563252	0.589547	0.575714	0.52346	0.579098	0.684064	0.704796	0.277778	0.306742
GSM387957	0.534372	0.577044	0.596747	0.828156	0.531938	0.8873	0.515439	0.531081	0.747097	0.636822	0.647057	0.630208	0.61004	0.635693	0.613951	0.592559	0.574717	0.526027	0.605578	0.693547	0.728914	0.576989	0.343245
GSM387958	0.295426	0.311365	0.388269	0.560625	0.0662107	0.909532	0.345954	0.769734	0.853201	0.634141	0.582791	0.607505	0.589793	0.629055	0.50592	0.394197	0.486132	0.480177	0.494432	0.646805	0.698066	0.409461	0.276805
GSM387959	0.597401	0.502862	0.545246	0.759054	0.482888	0.985276	0.920155	0.696413	0.841125	0.682009	0.628225	0.623282	0.56365	0.677838	0.572562	0.56613	0.514618	0.618491	0.670894	0.696708	0.787006	0.978357	0.608922
GSM387960	0.656431	0.619941	0.539218	0.84805	0.69595	0.888514	0.28113	0.295906	0.59935	0.555292	0.681702	0.66379	0.635926	0.613263	0.620192	0.65897	0.618022	0.515984	0.578907	0.715956	0.689237	0.324316	0.274878
GSM387961	0.667987	0.584748	0.572185	0.804914	0.577621	0.936557	0.708828	0.561467	0.753373	0.626837	0.655322	0.63263	0.603185	0.648264	0.583843	0.640924	0.573237	0.570267	0.643352	0.72339	0.752255	0.795732	0.394167
GSM387962	0.705247	0.58875	0.675715	0.795415	0.511076	0.931572	0.664532	0.568556	0.747448	0.617033	0.64167	0.612116	0.606613	0.624538	0.601803	0.622968	0.563382	0.554282	0.629921	0.687138	0.717074	0.747397	0.379781
GSM387963	0.624743	0.505002	0.65595	0.737893	0.414265	0.967875	0.749982	0.657424	0.814637	0.65572	0.631185	0.613564	0.596861	0.664633	0.54836	0.581948	0.550471	0.582143	0.633246	0.67036	0.74044	0.837126	0.46248
GSM387964	0.589481	0.464067	0.536609	0.627176	0.313226	0.953928	0.74414	0.738329	0.840058	0.679111	0.649718	0.586144	0.576846	0.638204	0.549868	0.564335	0.563707	0.575751	0.622852	0.681363	0.753626	0.799685	0.561364
GSM387965	0.718928	0.515269	0.698708	0.766866	0.57521	0.981082	0.540459	0.584633	0.751447	0.618515	0.622936	0.620005	0.615103	0.670515	0.571175	0.610886	0.562312	0.570491	0.646646	0.724775	0.757987	0.593185	0.422013
GSM387966	0.485826	0.405298	0.589288	0.66738	0.41087	0.881631	0.381113	0.69149	0.850421	0.687526	0.628244	0.622492	0.598775	0.656181	0.557934	0.491039	0.508771	0.506132	0.59199	0.671358	0.703256	0.432411	0.180955
GSM387967	0.774728	0.71776	0.684048	0.85496	0.725687	0.923238	0.508915	0.529056	0.722417	0.605664	0.656336	0.663145	0.662248	0.660298	0.58191	0.655373	0.593076	0.542232	0.643251	0.716679	0.708291	0.529845	0.363493
GSM387968	0.693748	0.582399	0.643819	0.715026	0.15897	0.951654	0.504783	0.676459	0.82417	0.659506	0.619238	0.588779	0.59316	0.628368	0.539507	0.576296	0.512431	0.533362	0.635521	0.672525	0.707278	0.579543	0.301401
GSM387969	0.658944	0.460293	0.59093	0.684415	0.418269	0.96849	0.926437	0.604009	0.775888	0.638513	0.62235	0.63691	0.582793	0.704327	0.549242	0.509152	0.537464	0.636313	0.660402	0.724001	0.780151	0.970441	0.664528
GSM387970	0.832135	0.74185	0.70223	0.859707	0.483003	0.906504	0.168441	0.658087	0.771798	0.632378	0.655818	0.649769	0.636726	0.631889	0.593173	0.674842	0.569155	0.521126	0.637072	0.728326	0.716198	0.178038	0.259207
GSM387971	0.645465	0.471902	0.583625	0.695602	0.42015	0.923589	0.631644	0.644694	0.785	0.614276	0.603904	0.606183	0.607143	0.615125	0.539136	0.569906	0.532412	0.569972	0.646516	0.66593	0.71903	0.727959	0.43888
GSM387972	0.659445	0.631007	0.689873	0.828312	0.533414	0.919257	0.527788	0.631358	0.783887	0.605853	0.639206	0.623502	0.625895	0.593774	0.593313	0.610909	0.533763	0.530578	0.613714	0.666945	0.680058	0.64633	0.332894
GSM387973	0.689066	0.559625	0.716965	0.754669	0.480541	0.932415	0.659181	0.641257	0.795082	0.653645	0.638243	0.61775	0.616926	0.601646	0.585963	0.602214	0.557222	0.537594	0.609194	0.66954	0.70566	0.757646	0.388537
GSM387974	0.616294	0.436674	0.64159	0.694821	0.379257	0.971734	0.91811	0.684232	0.838672	0.660969	0.62316	0.623416	0.591868	0.668639	0.540916	0.542867	0.558243	0.579289	0.630759	0.683059	0.763551	0.959968	0.517332
GSM387975	0.747917	0.548872	0.647728	0.753114	0.333781	0.998875	0.800874	0.678294	0.800732	0.670611	0.642349	0.611764	0.610279	0.693551	0.566549	0.63676	0.562617	0.572414	0.642547	0.701506	0.780364	0.878015	0.47849
GSM387976	0.600667	0.624215	0.59878	0.799598	0.424341	0.91367	0.598406	0.659204	0.828529	0.667884	0.639447	0.616913	0.628359	0.624827	0.588222	0.607772	0.540368	0.538187	0.610264	0.701114	0.724139	0.702655	0.37827
GSM387977	0.653956	0.539612	0.645089	0.725372	0.357905	0.936198	0.597274	0.626727	0.783282	0.638341	0.618661	0.605692	0.578502	0.632468	0.574726	0.590641	0.539842	0.546621	0.614114	0.693555	0.723123	0.683198	0.419205
GSM387978	0.71229	0.637625	0.661779	0.842402	0.407698	0.860565	0.576377	0.399079	0.663416	0.585188	0.667506	0.651408	0.580776	0.62331	0.612546	0.612626	0.57641	0.545006	0.590342	0.712677	0.716496	0.651134	0.357904
GSM387979	0.635136	0.540568	0.665337	0.813614	0.404349	0.910958	0.548411	0.559164	0.741333	0.611993	0.634237	0.641394	0.616665	0.652563	0.596745	0.617242	0.572401	0.517543	0.587645	0.709242	0.741922	0.62554	0.256231
GSM387980	0.672525	0.623029	0.663788	0.838284	0.441393	0.913479	0.520773	0.646754	0.799362	0.672463	0.674974	0.630994	0.601582	0.646993	0.597822	0.64573	0.594581	0.534279	0.591871	0.713787	0.731924	0.606946	0.271561
GSM387981	0.597248	0.575908	0.64011	0.786724	0.422974	0.906698	0.47871	0.668354	0.803421	0.658865	0.622732	0.61243	0.599886	0.633128	0.583147	0.585152	0.533712	0.530105	0.627513	0.713861	0.731497	0.556722	0.330837
GSM387982	0.637914	0.45104	0.654402	0.785207	0.455251	0.892933	0.660846	0.467482	0.683014	0.547597	0.617363	0.637827	0.627811	0.668558	0.565315	0.576494	0.568994	0.505391	0.571337	0.686384	0.706091	0.714951	0.22424
GSM387983	0.684309	0.696394	0.663187	0.859934	0.569045	0.924737	0.618101	0.523534	0.730361	0.603736	0.665569	0.634398	0.640425	0.640586	0.617246	0.668016	0.585915	0.545523	0.646696	0.705956	0.704364	0.694408	0.376675
GSM387984	0.619531	0.599443	0.617308	0.717971	0.099747	0.829958	0.662688	0.682302	0.812966	0.673534	0.624623	0.618066	0.596499	0.664527	0.554516	0.605924	0.556016	0.561715	0.63963	0.692838	0.737225	0.748337	0.40571
GSM387985	0.629591	0.536275	0.653972	0.732709	0.492708	0.919773	0.452135	0.593152	0.75865	0.627684	0.612996	0.603632	0.596239	0.639831	0.554212	0.576963	0.552102	0.521682	0.594091	0.680537	0.723005	0.538049	0.314433
GSM387986	0.47115	0.496872	0.512144	0.694892	0.323078	0.903912	0.402883	0.631378	0.804676	0.616066	0.595018	0.587195	0.610217	0.615854	0.544942	0.517822	0.493596	0.486186	0.546647	0.622056	0.675513	0.462168	0.245226
GSM387987	0.526993	0.468816	0.611208	0.766217	0.283466	0.90794	0.427877	0.662451	0.849166	0.68023	0.619818	0.595913	0.610031	0.617464	0.558157	0.55452	0.509691	0.502081	0.569401	0.666264	0.725329	0.52229	0.319945
GSM858082	0.681235	0.564406	0.684221	0.728534	0.467946	0.97004	0.901972	0.661744	0.795921	0.651792	0.629768	0.608777	0.595753	0.689117	0.567806	0.584757	0.543533	0.597566	0.674466	0.70752	0.772358	0.964197	0.537668
GSM858083	0.515472	0.52035	0.581771	0.745644	0.301261	0.958868	0.745148	0.746162	0.859025	0.684482	0.63157	0.615741	0.611175	0.683221	0.554638	0.572236	0.540525	0.594099	0.678478	0.715853	0.773039	0.814804	0.45468
GSM858084	0.602605	0.546912	0.63348	0.754066	0.455493	0.928756	0.517314	0.60295	0.768354	0.626448	0.620511	0.614765	0.588293	0.654466	0.573714	0.578096	0.521317	0.547714	0.647934	0.701421	0.721331	0.589906	0.365666
GSM858085	0.746964	0.538498	0.678786	0.713951	0.420181	0.934324	0.745089	0.696287	0.856018	0.664054	0.614765	0.600069	0.600878	0.613006	0.590432	0.556283	0.507863	0.55128	0.604794	0.667634	0.717357	0.842218	0.451267
GSM858086	0.747106	0.629843	0.701713	0.824286	0.433873	0.901999	0.413667	0.62838	0.780175	0.649027	0.645935	0.613665	0.609875	0.642265	0.577465	0.643643	0.554402	0.533891	0.602022	0.702444	0.707602	0.45793	0.380289
GSM858087	0.66349	0.660017	0.665067	0.806307	0.407687	0.943531	0.566219	0.539446	0.707253	0.586765	0.642734	0.623154	0.642476	0.614122	0.600355	0.633292	0.569071	0.561222	0.649466	0.685225	0.705002	0.660199	0.327036
GSM858088	0.661247	0.596258	0.67084	0.796177	0.42704	0.938228	0.715137	0.593767	0.756595	0.619799	0.645362	0.63543	0.609457	0.664344	0.584818	0.629823	0.598697	0.568219	0.634455	0.721246	0.749396	0.793069	0.386991
GSM858089	0.575166	0.682277	0.479644	0.866104	0.695717	0.867032	0.478047	0.429861	0.647335	0.571496	0.674216	0.65461	0.604642	0.627312	0.623129	0.648509	0.614446	0.541894	0.614836	0.715628	0.686972	0.549493	0.300652
GSM858090	0.621268	0.586424	0.561405	0.841043	0.509365	0.872158	0.548521	0.417022	0.641045	0.576612	0.656808	0.654491	0.604392	0.632145	0.585406	0.633721	0.604727	0.526714	0.584741	0.713724	0.710982	0.627299	0.307117
GSM858091	0.634425	0.67393	0.523752	0.863113	0.649523	0.904065	0.700471	0.388693	0.611914	0.552008	0.676313	0.659137	0.604294	0.642488	0.607968	0.640719	0.597254	0.586358	0.678698	0.72459	0.703337	0.760828	0.372218
GSM858092	0.563616	0.558432	0.587875	0.743695	0.473871	0.919195	0.493256	0.634752	0.811431	0.648641	0.628329	0.622561	0.607526	0.652387	0.560741	0.579949	0.533304	0.529187	0.603047	0.693786	0.727299	0.587534	0.327869
GSM858093	0.526647	0.466687	0.596744	0.69704	0.482087	0.932934	0.73852	0.682584	0.827905	0.656848	0.607043	0.623592	0.609781	0.680796	0.523116	0.527072	0.534222	0.551744	0.63583	0.700412	0.763543	0.796822	0.404178
GSM858094	0.636028	0.552992	0.638038	0.743379	0.530725	0.94899	0.721631	0.594479	0.785872	0.651785	0.649205	0.615306	0.601243	0.648264	0.568417	0.589252	0.56062	0.568832	0.634393	0.697459	0.745245	0.811101	0.411183
GSM858095	0.552408	0.437872	0.574885	0.683448	0.439156	0.937682	0.543652	0.658532	0.828834	0.667074	0.619429	0.618964	0.599708	0.631939	0.567447	0.526885	0.51087	0.536146	0.631567	0.697624	0.76359	0.628314	0.349157
GSM858096	0.782203	0.692774	0.669477	0.843564	0.629078	0.916149	0.688861	0.383734	0.650516	0.574056	0.665502	0.644367	0.642363	0.606392	0.618029	0.62682	0.597245	0.59459	0.639641	0.699443	0.683599	0.760773	0.408255
GSM858097	0.632018	0.536067	0.596496	0.759328	0.406874	0.918485	0.711559	0.662091	0.820587	0.667235	0.618345	0.609177	0.568272	0.644733	0.557201	0.571231	0.537235	0.56423	0.62669	0.702491	0.75898	0.804663	0.455742
GSM858098	0.605987	0.550251	0.616306	0.721982	0.268784	0.92018	0.264807	0.676814	0.8404	0.683403	0.620617	0.598549	0.618204	0.617299	0.548094	0.567845	0.532496	0.495896	0.547475	0.705371	0.732107	0.355642	0.319436
GSM858099	0.652957	0.522502	0.584175	0.721931	0.434642	0.907899	0.596142	0.605916	0.789878	0.626492	0.622768	0.620338	0.613269	0.62533	0.56884	0.573298	0.520381	0.531147	0.59601	0.676727	0.734071	0.679437	0.394101
GSM858100	0.666843	0.592823	0.722342	0.822437	0.51198	0.901222	0.495351	0.522928	0.692729	0.599166	0.645075	0.628	0.623899	0.636862	0.598203	0.629588	0.575965	0.560206	0.609981	0.693745	0.696846	0.616224	0.34508
GSM858101	0.707481	0.593703	0.674407	0.728445	0.462394	0.956656	0.572734	0.721246	0.844301	0.668136	0.614823	0.588166	0.588388	0.596142	0.574554	0.589767	0.513956	0.54936	0.630365	0.679039	0.722909	0.681705	0.35581
GSM858102	0.55531	0.435486	0.549204	0.678425	0.253476	0.934539	0.463968	0.663778	0.82001	0.656101	0.63527	0.636816	0.628364	0.677404	0.559384	0.591156	0.541676	0.529979	0.621932	0.708416	0.753125	0.504175	0.339075
GSM858103	0.449554	0.227751	0.557951	0.598215	0.199753	0.818386	0.378544	0.633054	0.794159	0.65616	0.593238	0.601436	0.596074	0.621986	0.556242	0.486705	0.512544	0.541379	0.604502	0.692514	0.721237	0.485449	0.343352
GSM858104	0.596429	0.649267	0.685847	0.832885	0.557743	0.875598	0.405208	0.349133	0.613637	0.559334	0.645448	0.632681	0.668235	0.62363	0.611868	0.639665	0.602408	0.504411	0.549504	0.660661	0.681516	0.457933	0.280519
GSM858105	0.606553	0.538376	0.630131	0.769852	0.302682	0.950431	0.861958	0.703951	0.831421	0.684961	0.632527	0.620013	0.589844	0.672584	0.567444	0.573398	0.542954	0.597446	0.618814	0.689447	0.767848	0.926871	0.5629
GSM858106	0.729666	0.606487	0.625556	0.829165	0.526782	0.906732	0.67724	0.654558	0.812898	0.655121	0.658274	0.635653	0.586695	0.630616	0.599808	0.632984	0.559493	0.572152	0.656937	0.699198	0.715268	0.779196	0.36
GSM858107	0.763234	0.668505	0.639975	0.833766	0.559321	0.934194	0.656031	0.578742	0.76765	0.628869	0.639227	0.629198	0.606574	0.652385	0.576458	0.616202	0.567314	0.595923	0.698938	0.722953	0.728144	0.730611	0.46594
GSM858108	0.49889	0.477533	0.54794	0.67821	0.24734	0.920948	0.233435	0.712551	0.852622	0.68763	0.617084	0.608573	0.614014	0.602396	0.556772	0.569	0.507517	0.507519	0.603117	0.664404	0.68583	0.249121	0.225287
GSM858109	0.624583	0.526576	0.587128	0.686522	0.405325	0.938738	0.548645	0.673401	0.82326	0.670155	0.613421	0.612643	0.570329	0.63152	0.540876	0.571093	0.523624	0.558112	0.652921	0.689949	0.710261	0.586255	0.349351
GSM858110	0.583131	0.436993	0.632197	0.762383	0.416816	0.88553	0.574607	0.433944	0.596045	0.52218	0.618	0.635943	0.607506	0.591445	0.58725	0.526073	0.548409	0.491998	0.561043	0.651434	0.707955	0.62982	0.236637
GSM858111	0.710765	0.564531	0.614125	0.743039	0.373492	0.963399	0.789507	0.638509	0.803327	0.645607	0.638415	0.62246	0.602531	0.652242	0.558827	0.60005	0.568846	0.59109	0.642269	0.720176	0.754563	0.858079	0.55003
GSM858112	0.562885	0.58639	0.630957	0.746012	0.255796	0.895273	0.59926	0.66309	0.796822	0.656855	0.616566	0.622989	0.602581	0.615518	0.553446	0.573314	0.512603	0.543307	0.595895	0.667357	0.72245	0.663758	0.359085
GSM858113	0.519165	0.468156	0.590604	0.751999	0.409007	0.915295	0.544925	0.577573	0.737734	0.611845	0.618245	0.601668	0.584081	0.65266	0.546777	0.53138	0.538425	0.533104	0.613441	0.691528	0.712204	0.630745	0.281589
GSM858114	0.628219	0.628707	0.516899	0.844051	0.767091	0.904755	0.538397	0.439585	0.671062	0.58536	0.65455	0.664791	0.625962	0.648657	0.605393	0.62578	0.60639	0.541807	0.623072	0.714182	0.709511	0.609954	0.312713
GSM858115	0.560417	0.483884	0.614541	0.727477	0.390227	0.950353	0.572983	0.62296	0.795426	0.638691	0.609442	0.59255	0.602655	0.64893	0.534768	0.53633	0.534375	0.557308	0.60024	0.688403	0.731806	0.669261	0.433839
GSM858116	0.566983	0.451725	0.601344	0.667568	0.326507	0.927634	0.444351	0.670102	0.816595	0.648707	0.61248	0.604928	0.596699	0.613604	0.51366	0.54864	0.517587	0.512803	0.582145	0.656391	0.675599	0.548694	0.316542
GSM858117	0.657723	0.599644	0.596437	0.793762	0.498999	0.929159	0.592498	0.594226	0.784707	0.633674	0.641143	0.629073	0.613568	0.638965	0.582234	0.606636	0.561072	0.555509	0.596553	0.693673	0.723429	0.682905	0.377187
GSM858118	0.782124	0.616155	0.723813	0.814273	0.525423	0.924874	0.559742	0.549754	0.729483	0.610164	0.658147	0.627452	0.570351	0.639145	0.590227	0.632745	0.565432	0.563208	0.635252	0.713987	0.709403	0.643599	0.358583
GSM858119	0.570748	0.626826	0.412325	0.845142	0.847279	0.872003	0.195779	0.348357	0.588578	0.54526	0.665123	0.649815	0.634903	0.621509	0.597131	0.655089	0.627852	0.495029	0.552675	0.701054	0.681239	0.226761	0.232945
GSM858120	0.629323	0.537332	0.593667	0.760911	0.437858	0.89637	0.476101	0.66887	0.803608	0.664121	0.635074	0.598476	0.601299	0.613032	0.554399	0.579497	0.512744	0.522963	0.582357	0.702407	0.715122	0.558642	0.318252
GSM858121	0.826781	0.763844	0.748543	0.849294	0.609445	0.929758	0.50661	0.554691	0.712946	0.608235	0.650428	0.636053	0.648619	0.631795	0.59441	0.675562	0.594278	0.577576	0.642286	0.704976	0.688227	0.610302	0.371888
GSM858122	0.520242	0.429809	0.543012	0.725094	0.390088	0.930021	0.550556	0.490435	0.659966	0.573889	0.610989	0.618213	0.576481	0.662644	0.561931	0.528994	0.521635	0.548761	0.607792	0.693679	0.71557	0.592255	0.313411
GSM858123	0.705387	0.639999	0.668978	0.822284	0.389148	0.841563	0.452505	0.608303	0.751122	0.625758	0.649398	0.599014	0.608114	0.617557	0.597632	0.634218	0.563601	0.519794	0.595554	0.696866	0.71381	0.520975	0.307394
GSM858124	0.686845	0.59686	0.684719	0.799981	0.292697	0.883209	0.39513	0.60371	0.775325	0.652973	0.631732	0.624174	0.620672	0.633915	0.589526	0.593076	0.562906	0.541419	0.598597	0.698896	0.715093	0.44838	0.290538
GSM858125	0.659103	0.438481	0.707642	0.780602	0.538382	0.908441	0.652672	0.455881	0.662323	0.560619	0.639162	0.626544	0.58182	0.647465	0.571106	0.568304	0.54561	0.544795	0.62553	0.687811	0.712865	0.719057	0.363242
GSM858126	0.488114	0.402678	0.53297	0.673648	0.348046	0.931909	0.548651	0.591691	0.733441	0.608068	0.610164	0.604002	0.592071	0.614952	0.551431	0.516952	0.520313	0.536228	0.595667	0.659907	0.663453	0.62254	0.330201
GSM858127	0.687504	0.583104	0.64174	0.792332	0.481777	0.910585	0.5364	0.609108	0.763552	0.630458	0.637404	0.631391	0.588237	0.637456	0.577843	0.586752	0.553143	0.526514	0.596117	0.686026	0.714261	0.576214	0.333435
GSM858128	0.529216	0.486785	0.55384	0.70193	0.441497	0.935654	0.567618	0.64369	0.818956	0.660395	0.620878	0.579228	0.578471	0.669972	0.551558	0.560364	0.51141	0.550296	0.608383	0.68495	0.745054	0.660981	0.385583
GSM858129	0.646531	0.608227	0.655515	0.7661	0.601361	0.914509	0.517602	0.666736	0.8269	0.67609	0.623288	0.621117	0.600274	0.650199	0.578049	0.613361	0.536382	0.553449	0.650132	0.688874	0.712269	0.596823	0.296769
GSM858130	0.513042	0.604012	0.434173	0.863718	0.449243	0.845574	0.376012	0.443866	0.657424	0.573617	0.658484	0.651804	0.591831	0.645536	0.578697	0.639445	0.583368	0.514555	0.5795	0.701369	0.702637	0.41371	0.279118
GSM858131	0.766915	0.501359	0.703906	0.692524	0.48629	0.956345	0.777032	0.599331	0.790089	0.648322	0.643768	0.632245	0.614138	0.634622	0.562662	0.59217	0.568784	0.554588	0.643581	0.696155	0.727676	0.851496	0.460249
GSM858132	0.498814	0.432049	0.589307	0.723858	0.308786	0.928604	0.732667	0.543364	0.710932	0.581231	0.612005	0.60073	0.57241	0.641951	0.545859	0.518116	0.530516	0.533941	0.623069	0.677214	0.70446	0.786527	0.363255
GSM858133	0.720483	0.594073	0.758243	0.798694	0.299801	0.766795	0.394456	0.590466	0.766578	0.620921	0.628982	0.640737	0.66672	0.581696	0.561074	0.621297	0.547908	0.49286	0.527268	0.661258	0.676345	0.453648	0.260208
GSM858134	0.765867	0.538505	0.716214	0.683502	0.459525	0.974997	0.941116	0.638161	0.788893	0.645467	0.64786	0.633413	0.601285	0.70922	0.552198	0.600017	0.569765	0.627896	0.669723	0.740108	0.794092	0.983883	0.665001
GSM858135	0.810094	0.771643	0.653358	0.872092	0.605863	0.956316	0.763262	0.550647	0.712493	0.592495	0.656183	0.628166	0.636205	0.644847	0.643364	0.685945	0.579284	0.602164	0.717545	0.711697	0.726923	0.843527	0.471341
GSM858136	0.822561	0.632589	0.717438	0.792766	0.619199	0.928212	0.730436	0.50678	0.707874	0.581888	0.661286	0.638801	0.633193	0.63454	0.606576	0.61903	0.581581	0.564908	0.639306	0.685106	0.701138	0.796009	0.389777
GSM858137	0.745037	0.71482	0.704337	0.82924	0.386959	0.92772	0.410451	0.632833	0.768954	0.630695	0.649371	0.613045	0.595655	0.607654	0.602689	0.658233	0.551239	0.54902	0.61454	0.686052	0.675929	0.41844	0.33621
GSM1379261	0.564914	0.550827	0.705754	0.70923	0.414672	0.961481	0.656531	0.646663	0.817403	0.687867	0.631792	0.601786	0.579641	0.659665	0.540623	0.568042	0.545373	0.555845	0.6487	0.713967	0.737867	0.753995	0.380467
GSM1379262	0.469702	0.312534	0.563835	0.728787	0.354032	0.900576	0.463029	0.540038	0.708412	0.607984	0.605609	0.641464	0.628582	0.646932	0.549339	0.565187	0.553665	0.541053	0.603262	0.680491	0.713491	0.555318	0.325344
GSM1379263	0.571838	0.516326	0.674648	0.758041	0.310806	0.860409	0.553398	0.566036	0.743408	0.628674	0.642293	0.614736	0.596213	0.62562	0.578167	0.565244	0.569303	0.544161	0.635231	0.703464	0.70175	0.614993	0.305191
GSM1379264	0.509101	0.433908	0.51415	0.651416	0.355213	0.967964	0.795044	0.723894	0.845482	0.681999	0.627765	0.622745	0.577996	0.65217	0.56298	0.516096	0.526774	0.561771	0.646021	0.700929	0.749999	0.857497	0.391457
GSM1379265	0.780413	0.514856	0.726422	0.746872	0.612543	0.908367	0.615047	0.443946	0.694769	0.581555	0.617107	0.644523	0.586228	0.611307	0.564154	0.587812	0.558365	0.559152	0.611374	0.6911	0.676481	0.686806	0.329084
GSM1379266	0.682884	0.610708	0.65995	0.76	0.375501	0.952698	0.722463	0.60571	0.754757	0.617068	0.627932	0.610313	0.582615	0.656115	0.560924	0.602107	0.540409	0.597262	0.663022	0.700294	0.729018	0.809753	0.485502
GSM1379267	0.814313	0.748622	0.723786	0.866844	0.832456	0.904514	0.413042	0.437531	0.652662	0.584994	0.669504	0.664642	0.666335	0.617774	0.623743	0.680504	0.602038	0.554337	0.632353	0.703377	0.681699	0.493705	0.361474
GSM1379268	0.541657	0.458531	0.561871	0.694522	0.424219	0.939578	0.538219	0.647601	0.861839	0.64838	0.619015	0.608414	0.564374	0.604047	0.528111	0.502473	0.485012	0.56121	0.625485	0.655608	0.692346	0.630515	0.389548
GSM1379269	0.831746	0.663396	0.730972	0.831146	0.647116	0.889584	0.575668	0.326997	0.601777	0.540937	0.63776	0.64475	0.6183	0.624324	0.605974	0.633046	0.592062	0.549072	0.618249	0.684342	0.67331	0.610514	0.333759
GSM1379270	0.57291	0.546541	0.637648	0.711091	0.342779	0.811326	0.582844	0.676219	0.811406	0.625654	0.634979	0.607346	0.659987	0.634959	0.551934	0.530036	0.546931	0.512157	0.562293	0.6862	0.721565	0.670766	0.371252
GSM1379271	0.624794	0.623713	0.621561	0.786538	0.356352	0.951105	0.84916	0.621846	0.771519	0.64025	0.641314	0.62335	0.618348	0.678232	0.586238	0.63437	0.54072	0.591499	0.647033	0.702935	0.761769	0.921824	0.498743
GSM1379272	0.573197	0.528803	0.561043	0.74247	0.603376	0.924502	0.539251	0.617025	0.795807	0.652421	0.644942	0.621022	0.60381	0.607303	0.545981	0.570501	0.519933	0.55099	0.644814	0.6668	0.702903	0.606045	0.346631
GSM1379273	0.538816	0.424637	0.632248	0.680833	0.449873	0.870609	0.37895	0.615271	0.796165	0.663187	0.619366	0.613801	0.610242	0.678148	0.562755	0.544279	0.541802	0.516918	0.588718	0.714178	0.741371	0.421325	0.305972
GSM1379274	0.439025	0.3748	0.558311	0.694451	0.304796	0.925954	0.707699	0.605656	0.77439	0.627255	0.622431	0.618832	0.623311	0.644616	0.538713	0.535941	0.527606	0.532247	0.624471	0.698498	0.714429	0.790269	0.414341
GSM1379275	0.734096	0.606363	0.693611	0.782492	0.429927	0.934695	0.422852	0.665854	0.792523	0.651504	0.648526	0.622113	0.585149	0.613282	0.573238	0.600391	0.562977	0.556787	0.654834	0.695696	0.719163	0.461875	0.369259
GSM1379276	0.59959	0.545788	0.584405	0.801206	0.48121	0.904347	0.450332	0.570099	0.736514	0.62734	0.647431	0.609267	0.586164	0.632014	0.56991	0.602536	0.56579	0.557973	0.629285	0.688982	0.700078	0.503052	0.338807
GSM1379277	0.681817	0.581908	0.635385	0.824164	0.473186	0.959784	0.729548	0.637763	0.80415	0.661639	0.629123	0.613281	0.599417	0.651828	0.583391	0.62252	0.556169	0.586979	0.64863	0.721572	0.73869	0.817139	0.422808
GSM1379278	0.497728	0.314497	0.584022	0.616509	0.273605	0.943808	0.345532	0.659438	0.794038	0.657923	0.619203	0.611587	0.60779	0.656529	0.555631	0.5145	0.513023	0.531935	0.603235	0.709434	0.733974	0.406652	0.278062
GSM1379279	0.697213	0.650784	0.602364	0.83585	0.488899	0.913514	0.388374	0.643069	0.803535	0.650682	0.638515	0.613172	0.579967	0.611853	0.595918	0.624243	0.535709	0.544257	0.633447	0.684595	0.70462	0.427786	0.309828
GSM1379280	0.740916	0.582391	0.708015	0.781344	0.622907	0.853271	0.454014	0.582645	0.742015	0.648595	0.636977	0.600562	0.563632	0.622209	0.589704	0.619629	0.532532	0.53469	0.60949	0.690711	0.67284	0.528814	0.23911
GSM1379281	0.797784	0.695349	0.649839	0.834139	0.483061	0.946584	0.733838	0.65626	0.80709	0.634519	0.665074	0.622426	0.559185	0.620111	0.586295	0.64175	0.55037	0.593864	0.693585	0.697134	0.71087	0.824386	0.48511
GSM1379282	0.642423	0.57955	0.632872	0.705271	0.333308	0.928896	0.708955	0.713421	0.838211	0.680351	0.644083	0.618035	0.599029	0.652409	0.578901	0.596671	0.553167	0.56341	0.629427	0.702018	0.73353	0.781981	0.384214
GSM1379283	0.741422	0.711041	0.670699	0.858116	0.621619	0.893678	0.494947	0.394117	0.627397	0.564338	0.64766	0.660379	0.590662	0.624016	0.617131	0.667514	0.590672	0.562403	0.626128	0.708785	0.691152	0.531228	0.383561
GSM1379284	0.589532	0.615323	0.566093	0.834574	0.452531	0.902432	0.376347	0.516599	0.728362	0.602123	0.628223	0.612461	0.629196	0.611642	0.58727	0.653875	0.548517	0.511306	0.575085	0.682556	0.690587	0.404932	0.270465
GSM1379285	0.637498	0.37709	0.647966	0.730701	0.508173	0.934275	0.572524	0.559085	0.721796	0.597839	0.626147	0.62467	0.604582	0.64652	0.566754	0.566221	0.570695	0.554418	0.607821	0.697186	0.724813	0.663804	0.328294
GSM1379286	0.490673	0.517406	0.524585	0.787834	0.33489	0.903713	0.509884	0.596277	0.781994	0.656735	0.624632	0.604432	0.643466	0.634357	0.573934	0.588874	0.537136	0.533648	0.559446	0.668027	0.72313	0.610948	0.331885
GSM1379287	0.710163	0.647635	0.678539	0.803479	0.345437	0.910671	0.571056	0.559924	0.724867	0.599938	0.620022	0.641116	0.592601	0.633372	0.577149	0.605628	0.534676	0.567551	0.631926	0.702568	0.725828	0.673757	0.34517
GSM1379288	0.629785	0.576136	0.663609	0.775768	0.505789	0.848044	0.365426	0.616517	0.783931	0.649139	0.645952	0.604596	0.593694	0.633956	0.552394	0.569565	0.548449	0.522355	0.617691	0.679508	0.716543	0.415209	0.318349
GSM1379289	0.621777	0.606622	0.636576	0.802211	0.332672	0.892005	0.338128	0.55069	0.684544	0.586818	0.633374	0.634336	0.6298	0.63673	0.581768	0.649116	0.583988	0.526788	0.573474	0.700222	0.711704	0.389733	0.263138
GSM1379290	0.787362	0.725887	0.770321	0.871967	0.558841	0.910367	0.582695	0.352824	0.583296	0.530879	0.66062	0.633819	0.616257	0.623986	0.615945	0.636394	0.607067	0.572654	0.638511	0.712875	0.701914	0.688968	0.368002
GSM1379291	0.589469	0.560432	0.630262	0.757733	0.348775	0.950599	0.766635	0.606255	0.798163	0.674375	0.65123	0.61517	0.591886	0.665714	0.560394	0.574903	0.551744	0.594577	0.651038	0.727498	0.752951	0.854382	0.453082
GSM1379292	0.529183	0.437075	0.606336	0.718808	0.329968	0.853868	0.247354	0.513206	0.702995	0.588795	0.635645	0.62275	0.646225	0.596171	0.560009	0.547327	0.547827	0.487309	0.550243	0.691998	0.705644	0.294543	0.261445
GSM1379293	0.465466	0.399413	0.555979	0.762895	0.31405	0.865345	0.361237	0.574595	0.724063	0.613869	0.612568	0.624028	0.644673	0.645185	0.560268	0.539615	0.541461	0.492749	0.564857	0.693194	0.733888	0.392981	0.258217
GSM1379294	0.656599	0.610396	0.604393	0.81757	0.402728	0.894182	0.660705	0.601413	0.833078	0.679966	0.649346	0.63188	0.62548	0.633861	0.587554	0.569637	0.53646	0.548201	0.606442	0.676002	0.747037	0.749211	0.379123
GSM1379295	0.875206	0.710197	0.722784	0.841294	0.473433	0.91612	0.679008	0.501348	0.762144	0.618113	0.639454	0.612025	0.581471	0.637445	0.607882	0.629904	0.550567	0.596646	0.667811	0.73218	0.721591	0.770995	0.430382
GSM1379296	0.595858	0.590855	0.607384	0.7732	0.446387	0.891853	0.433994	0.618655	0.790823	0.634173	0.637615	0.656977	0.604452	0.620835	0.582347	0.594693	0.559645	0.522501	0.578019	0.661625	0.708157	0.522178	0.330062
GSM1379297	0.683105	0.592774	0.651831	0.741579	0.384728	0.955845	0.609359	0.6417	0.762809	0.632097	0.615419	0.608065	0.596391	0.633334	0.549176	0.602642	0.556403	0.564334	0.634452	0.682537	0.708874	0.672202	0.364881
GSM1379298	0.846196	0.706856	0.742252	0.873154	0.894704	0.88139	0.465641	0.415313	0.643703	0.580861	0.682419	0.660679	0.612279	0.618453	0.622832	0.674728	0.608801	0.546987	0.642418	0.709241	0.702883	0.48921	0.283192
GSM1379299	0.562499	0.513011	0.615885	0.725416	0.435772	0.948718	0.459768	0.647061	0.831784	0.662506	0.626848	0.609102	0.622429	0.611453	0.531212	0.555452	0.515697	0.510337	0.576794	0.659789	0.708113	0.508799	0.337801
GSM1379300	0.821002	0.702893	0.756908	0.8775	0.60389	0.877463	0.575713	0.507156	0.704693	0.596532	0.636044	0.654065	0.650455	0.618535	0.612197	0.671638	0.592608	0.532427	0.595906	0.716519	0.697429	0.678961	0.319773
GSM1379301	0.551741	0.413707	0.498018	0.691194	0.621492	0.955144	0.810665	0.601159	0.78279	0.626919	0.626133	0.609923	0.580437	0.660509	0.546481	0.514583	0.52836	0.563466	0.594319	0.723542	0.775933	0.876637	0.494589
GSM1379302	0.678354	0.522438	0.544761	0.694303	0.542997	0.898283	0.427718	0.661837	0.84356	0.665224	0.630633	0.621374	0.574893	0.632701	0.584299	0.503058	0.484142	0.519063	0.594807	0.650635	0.728486	0.49203	0.289916
GSM1379303	0.693304	0.629317	0.685719	0.812088	0.434755	0.931709	0.56249	0.548833	0.721893	0.598648	0.634085	0.61277	0.631734	0.632149	0.583954	0.62834	0.57017	0.540345	0.619417	0.701499	0.722889	0.651019	0.394141
GSM1379304	0.763906	0.672123	0.719422	0.833376	0.657205	0.876372	0.487445	0.537387	0.708179	0.597156	0.629265	0.639535	0.647928	0.626214	0.600529	0.632305	0.560789	0.558291	0.637091	0.713237	0.715319	0.564332	0.312231
GSM1379305	0.530246	0.465897	0.577742	0.741924	0.355699	0.926559	0.578473	0.617593	0.783503	0.620559	0.640568	0.616986	0.628821	0.613615	0.560426	0.563136	0.541939	0.516572	0.579074	0.681241	0.728084	0.673038	0.364615
GSM1379306	0.607329	0.58259	0.603548	0.747926	0.353545	0.9677	0.690126	0.670909	0.79819	0.662307	0.643105	0.630813	0.626284	0.63559	0.577432	0.596118	0.565706	0.552033	0.635802	0.700624	0.713905	0.753952	0.379708
GSM1379307	0.7588	0.56591	0.681762	0.782698	0.547908	0.972299	0.962821	0.560473	0.711565	0.603085	0.645926	0.647849	0.605041	0.707311	0.5826	0.649755	0.587664	0.641307	0.691748	0.751237	0.79847	0.996299	0.679518
GSM1379308	0.601042	0.497777	0.456658	0.635052	0.430029	0.9713	0.764628	0.685452	0.820491	0.65989	0.618183	0.62324	0.606663	0.687186	0.547574	0.554462	0.551704	0.580717	0.628168	0.71937	0.758797	0.853474	0.453166
GSM1379309	0.508208	0.478609	0.592592	0.748046	0.339107	0.935121	0.501721	0.574636	0.744607	0.611166	0.605613	0.622843	0.632055	0.624213	0.569905	0.581257	0.522404	0.532449	0.588054	0.646082	0.680595	0.575914	0.372618
GSM1379310	0.711636	0.569919	0.660451	0.813517	0.551213	0.879377	0.512171	0.545135	0.714925	0.600282	0.637477	0.631037	0.607322	0.639948	0.57928	0.621259	0.582924	0.518634	0.580335	0.694379	0.717454	0.566329	0.31179
GSM1379311	0.571457	0.541236	0.579121	0.742404	0.540655	0.9114	0.503744	0.558692	0.764963	0.629036	0.63879	0.622798	0.600327	0.640832	0.550157	0.5756	0.580721	0.522676	0.596226	0.686225	0.704411	0.595863	0.283068
GSM1379312	0.657242	0.631175	0.545947	0.783778	0.3972	0.862719	0.572286	0.648126	0.734292	0.592012	0.637473	0.617645	0.602121	0.635496	0.582502	0.586965	0.539682	0.53001	0.601957	0.674132	0.706406	0.627761	0.37651
GSM1379313	0.540061	0.407303	0.592762	0.668004	0.484885	0.896541	0.542493	0.577548	0.802952	0.646917	0.621237	0.61104	0.546501	0.653104	0.527246	0.520843	0.522278	0.530641	0.58917	0.650652	0.674482	0.57874	0.340782
GSM1379314	0.742681	0.60835	0.680102	0.817703	0.427463	0.893035	0.314882	0.597694	0.720337	0.609593	0.667651	0.623938	0.616288	0.627864	0.591402	0.635128	0.572529	0.500166	0.612345	0.673987	0.682345	0.347888	0.249836
GSM1379315	0.613524	0.538856	0.554291	0.761478	0.347706	0.967836	0.84014	0.614979	0.749066	0.600947	0.652469	0.62385	0.593221	0.651676	0.59982	0.615293	0.561767	0.582232	0.629677	0.699583	0.744706	0.915099	0.493171
GSM1379316	0.633849	0.612639	0.511445	0.813532	0.385613	0.913081	0.43508	0.649208	0.822061	0.680111	0.651898	0.627411	0.603788	0.622516	0.571234	0.619304	0.544498	0.534076	0.620932	0.698533	0.719636	0.520191	0.286419
GSM1379317	0.662663	0.585305	0.640969	0.815145	0.339108	0.949327	0.758427	0.678509	0.803397	0.653554	0.616603	0.612187	0.606404	0.667914	0.581106	0.611916	0.549425	0.58137	0.641984	0.699697	0.745135	0.848028	0.499402
GSM1379318	0.623269	0.488676	0.620731	0.742361	0.396787	0.984384	0.827782	0.663958	0.798849	0.666881	0.630835	0.614951	0.62018	0.686389	0.576795	0.598504	0.587148	0.607759	0.700657	0.71655	0.75089	0.90035	0.552877
GSM1379319	0.58393	0.5671	0.679085	0.743761	0.441561	0.914918	0.537471	0.57173	0.729962	0.633532	0.624487	0.598245	0.626483	0.637423	0.539198	0.578207	0.539416	0.534372	0.573269	0.672116	0.698026	0.627744	0.369469
GSM1379320	0.678025	0.546991	0.635842	0.837622	0.632988	0.926353	0.742502	0.597519	0.746673	0.629024	0.63798	0.642246	0.642648	0.659194	0.57881	0.624777	0.587021	0.559914	0.621976	0.719404	0.760003	0.836368	0.434723
GSM1379321	0.574013	0.412179	0.605996	0.668403	0.292851	0.877202	0.380499	0.586814	0.804376	0.641225	0.595112	0.594457	0.607749	0.608552	0.562232	0.541448	0.4991	0.492149	0.554005	0.667106	0.679343	0.478348	0.237537
GSM1379322	0.539443	0.52669	0.446187	0.770869	0.350443	0.927772	0.712464	0.676153	0.815054	0.66463	0.620915	0.58948	0.571075	0.667157	0.567537	0.581799	0.531556	0.575277	0.652097	0.701529	0.740419	0.803799	0.477616
GSM1379323	0.562571	0.521366	0.585385	0.719821	0.450843	0.943083	0.395934	0.606129	0.792359	0.63462	0.620703	0.597823	0.595348	0.608398	0.537664	0.557639	0.510178	0.516064	0.630309	0.675102	0.703223	0.440902	0.261084
GSM1379324	0.565302	0.568267	0.500468	0.768949	0.469085	0.927069	0.477516	0.606025	0.771091	0.641827	0.642212	0.617817	0.576397	0.626639	0.561583	0.57822	0.546172	0.538319	0.625721	0.68918	0.704764	0.549464	0.284068
GSM1379325	0.579288	0.561227	0.616021	0.771188	0.391493	0.870343	0.68006	0.625116	0.799764	0.657486	0.649862	0.605511	0.603716	0.671347	0.574095	0.606886	0.56714	0.553552	0.638407	0.723266	0.73241	0.76534	0.399589
GSM1379326	0.604104	0.529237	0.593546	0.74161	0.41066	0.945343	0.569431	0.669842	0.82914	0.656238	0.624862	0.609401	0.586824	0.618929	0.570361	0.603482	0.548404	0.546951	0.59655	0.668712	0.714269	0.669193	0.340345
GSM1379327	0.640654	0.556908	0.625546	0.748877	0.430581	0.944881	0.654867	0.65256	0.785213	0.625595	0.625039	0.622413	0.621057	0.610958	0.578918	0.583111	0.539048	0.564455	0.627557	0.678752	0.734945	0.754358	0.385227
GSM1379328	0.820502	0.616152	0.726651	0.762306	0.552188	0.971296	0.955234	0.551729	0.71783	0.601276	0.644778	0.660286	0.614244	0.693864	0.581579	0.628811	0.591646	0.621852	0.673466	0.732038	0.789846	0.987402	0.64722
GSM1379329	0.72678	0.723766	0.683697	0.836102	0.373785	0.917663	0.515197	0.603972	0.755019	0.643849	0.663995	0.634867	0.623379	0.635902	0.622408	0.645517	0.578401	0.531108	0.581396	0.711988	0.733847	0.592037	0.314859
GSM1379330	0.637702	0.699043	0.701461	0.862449	0.553914	0.868505	0.589203	0.29442	0.571329	0.521294	0.660701	0.659329	0.626528	0.64307	0.593858	0.654725	0.626946	0.54881	0.611254	0.700577	0.699547	0.647353	0.328485
GSM1523727	0.460421	0.430827	0.564074	0.709098	0.286462	0.9399	0.408523	0.57699	0.788497	0.663861	0.646303	0.608647	0.607447	0.650508	0.581138	0.533399	0.553924	0.514773	0.582204	0.714913	0.726997	0.468038	0.270136
GSM1523728	0.687215	0.603354	0.634399	0.794536	0.569542	0.970697	0.657675	0.643012	0.809845	0.660413	0.661561	0.634372	0.604667	0.634437	0.585552	0.626911	0.584321	0.585357	0.664101	0.709711	0.731894	0.736485	0.407454
GSM1523729	0.601304	0.544814	0.594276	0.761945	0.43584	0.906903	0.426386	0.628426	0.787633	0.642768	0.638949	0.628043	0.581857	0.610525	0.567861	0.573397	0.541742	0.532536	0.602564	0.687731	0.700895	0.482877	0.289956
GSM1523744	0.656721	0.610592	0.617975	0.742702	0.337021	0.911123	0.531782	0.691496	0.818553	0.656722	0.648403	0.614613	0.601315	0.654839	0.563844	0.604204	0.562634	0.554481	0.631352	0.690192	0.717754	0.599849	0.365769
GSM1523745	0.685107	0.697953	0.645779	0.752833	0.453567	0.858825	0.520649	0.676812	0.838428	0.676336	0.615061	0.609747	0.608403	0.604641	0.572914	0.602635	0.539054	0.546902	0.624865	0.680712	0.694161	0.608895	0.349488
GSM1523746	0.538963	0.471173	0.618263	0.749788	0.353513	0.865379	0.436775	0.618591	0.801153	0.640145	0.620064	0.600811	0.59638	0.601838	0.559405	0.576457	0.512423	0.499198	0.602373	0.668638	0.72683	0.460927	0.269392
GSM1523747	0.618169	0.514759	0.658094	0.725774	0.347061	0.839554	0.435583	0.642854	0.831126	0.670128	0.639292	0.582063	0.59335	0.606045	0.524529	0.534632	0.552798	0.523992	0.608614	0.695806	0.745567	0.509255	0.308442
GSM1523748	0.599423	0.524595	0.573042	0.746108	0.508875	0.88348	0.471388	0.574424	0.769089	0.624714	0.619028	0.620579	0.559581	0.615465	0.574561	0.562537	0.5277	0.537438	0.611331	0.680858	0.697844	0.523631	0.2933
GSM1523765	0.516624	0.569975	0.521877	0.752483	0.380372	0.850084	0.353407	0.689464	0.838409	0.679552	0.650932	0.583439	0.610149	0.610936	0.545863	0.563886	0.557077	0.499084	0.577879	0.655885	0.690792	0.441334	0.345154
GSM1523768	0.829782	0.715786	0.738557	0.853814	0.563972	0.90016	0.584233	0.57621	0.727031	0.616977	0.649877	0.629748	0.597747	0.640614	0.598603	0.655501	0.570294	0.575182	0.681385	0.713572	0.70766	0.64064	0.396694
GSM1523769	0.768106	0.655527	0.621126	0.795625	0.510526	0.929872	0.703084	0.546866	0.723946	0.606696	0.642066	0.634855	0.583345	0.657221	0.583988	0.628013	0.582031	0.576129	0.634663	0.722664	0.745203	0.792313	0.422962
GSM1523770	0.60541	0.552276	0.6245	0.756151	0.242699	0.967493	0.836097	0.721494	0.83625	0.680017	0.646252	0.630121	0.575923	0.706876	0.537902	0.559713	0.553071	0.584853	0.685788	0.726046	0.7929	0.905657	0.554144
GSM1523771	0.763896	0.679045	0.667714	0.875324	0.556821	0.904061	0.708092	0.44207	0.645903	0.566016	0.64872	0.652765	0.582575	0.649195	0.631835	0.662114	0.598365	0.581337	0.6291	0.725069	0.735135	0.7982	0.405763
GSM1523772	0.695949	0.622273	0.650559	0.86852	0.455099	0.91046	0.562168	0.415928	0.608409	0.568215	0.664088	0.628391	0.63244	0.61874	0.617507	0.667222	0.61419	0.55583	0.601144	0.698239	0.699246	0.663394	0.311083
GSM1523773	0.738327	0.677154	0.734925	0.859104	0.549083	0.896062	0.61786	0.360644	0.615558	0.549077	0.648055	0.641099	0.60532	0.620367	0.619845	0.66463	0.583494	0.560876	0.62045	0.694106	0.69054	0.704966	0.348189
GSM1523774	0.767784	0.565616	0.720564	0.821163	0.598891	0.872664	0.480019	0.439598	0.635885	0.565013	0.636727	0.642656	0.565278	0.642312	0.600626	0.603002	0.569756	0.535581	0.633105	0.702651	0.706368	0.518731	0.29531
GSM1523775	0.57495	0.575451	0.538888	0.74035	0.308302	0.863037	0.517453	0.660757	0.836023	0.670301	0.640528	0.629151	0.590234	0.665787	0.565398	0.569535	0.544549	0.548741	0.619106	0.71793	0.733748	0.581939	0.360234
GSM1523776	0.535817	0.428788	0.626425	0.711932	0.394745	0.935191	0.785006	0.637622	0.818856	0.653053	0.611248	0.64337	0.631607	0.65429	0.544565	0.558621	0.519891	0.55629	0.622747	0.686584	0.731619	0.856975	0.435154
GSM1523777	0.644493	0.587243	0.631407	0.775239	0.364503	0.928963	0.292211	0.642304	0.811099	0.653743	0.654001	0.618445	0.621405	0.638571	0.565194	0.569034	0.538611	0.527468	0.600717	0.688805	0.725514	0.361526	0.294632
GSM1523778	0.729303	0.667966	0.64194	0.808332	0.615037	0.908344	0.609724	0.574675	0.755425	0.613358	0.628762	0.616939	0.587008	0.626237	0.594475	0.628969	0.552744	0.583078	0.658705	0.70648	0.72119	0.707319	0.408747
GSM1523779	0.51801	0.446495	0.520253	0.731779	0.430326	0.942938	0.712523	0.660254	0.833189	0.671134	0.610673	0.605209	0.580801	0.652975	0.56014	0.525007	0.535899	0.563854	0.617101	0.703384	0.734594	0.798702	0.405916
GSM1523780	0.753235	0.679946	0.644376	0.824382	0.382426	0.935349	0.669795	0.684762	0.834606	0.672296	0.635268	0.608295	0.597384	0.641693	0.592812	0.654559	0.580837	0.561464	0.627021	0.729244	0.737093	0.756061	0.436053
GSM1523781	0.467306	0.491291	0.482288	0.751963	0.302461	0.750707	0.243377	0.64194	0.822724	0.656451	0.610904	0.607908	0.580498	0.632377	0.555569	0.565183	0.552784	0.468605	0.56117	0.686603	0.745136	0.210594	0.269801
GSM1523782	0.641139	0.618511	0.601116	0.800642	0.364163	0.943832	0.435827	0.620358	0.795349	0.651707	0.654362	0.597845	0.615811	0.608135	0.565435	0.619224	0.565591	0.548573	0.636862	0.681345	0.702497	0.496012	0.36267
GSM1523783	0.57482	0.478213	0.569108	0.770371	0.420307	0.906172	0.439223	0.495053	0.638533	0.545723	0.639559	0.633038	0.595161	0.633666	0.563306	0.566701	0.555897	0.553089	0.607785	0.686176	0.690191	0.484995	0.377538
GSM1523784	0.654073	0.566643	0.663371	0.762105	0.554965	0.883863	0.472715	0.538158	0.723123	0.603684	0.642875	0.626972	0.590552	0.624429	0.567306	0.584704	0.567001	0.53917	0.631628	0.693854	0.706266	0.518245	0.325041
GSM1523785	0.587188	0.530713	0.570739	0.784869	0.391695	0.955417	0.703256	0.570157	0.737684	0.617782	0.630625	0.609356	0.578225	0.650894	0.599431	0.618193	0.549997	0.561565	0.634488	0.706998	0.726716	0.782597	0.399733
GSM1523786	0.628152	0.572262	0.602265	0.779103	0.467234	0.929084	0.671432	0.531616	0.721206	0.598055	0.625592	0.626701	0.582723	0.6274	0.570247	0.573385	0.556455	0.571208	0.631228	0.685544	0.709277	0.752982	0.408756
GSM1523787	0.459956	0.367055	0.491176	0.709551	0.380124	0.91435	0.41097	0.648284	0.830627	0.671765	0.630235	0.634051	0.614742	0.63803	0.58671	0.540625	0.54314	0.507919	0.561456	0.693337	0.731599	0.466225	0.310879
GSM1523788	0.86449	0.734241	0.722253	0.850552	0.633413	0.89562	0.60451	0.500346	0.715666	0.596749	0.646606	0.630478	0.600954	0.599818	0.614871	0.663257	0.570432	0.556722	0.622063	0.694344	0.691944	0.683982	0.356354
GSM1523789	0.763672	0.671044	0.645408	0.79071	0.616671	0.905051	0.48296	0.547968	0.744503	0.637424	0.640155	0.621225	0.617016	0.634861	0.58059	0.622582	0.583495	0.55216	0.585435	0.703992	0.711612	0.528399	0.358243
GSM1523790	0.810915	0.707973	0.743363	0.835506	0.503798	0.985665	0.771109	0.668606	0.78933	0.644131	0.651126	0.616296	0.589187	0.653999	0.579593	0.647574	0.581883	0.614999	0.710184	0.719829	0.745546	0.858071	0.516037
GSM1523791	0.663325	0.580137	0.613989	0.756724	0.438066	0.957516	0.796302	0.67601	0.815425	0.668639	0.631615	0.637763	0.603464	0.679082	0.59678	0.631778	0.613997	0.613586	0.688511	0.729992	0.769353	0.862791	0.519477
GSM1523792	0.525087	0.447868	0.536635	0.714492	0.402929	0.929816	0.585827	0.713789	0.856226	0.68149	0.626991	0.609009	0.554181	0.637251	0.562397	0.52351	0.523315	0.534332	0.598192	0.692654	0.733276	0.66263	0.331243
GSM1523793	0.590044	0.510463	0.436044	0.722006	0.388422	0.941576	0.721111	0.625015	0.786146	0.624238	0.618188	0.621103	0.592242	0.667891	0.562666	0.529109	0.505354	0.553792	0.598561	0.677265	0.717397	0.812792	0.375112
GSM1523794	0.736574	0.581444	0.434421	0.778899	0.437442	0.951555	0.874233	0.629345	0.789885	0.665551	0.680955	0.623066	0.590027	0.662172	0.609298	0.647387	0.58169	0.594734	0.681135	0.702083	0.728957	0.922881	0.535602
GSM1523795	0.703251	0.605463	0.624794	0.724246	0.437747	0.943472	0.5042	0.669595	0.814981	0.671872	0.640864	0.628035	0.623102	0.627721	0.579014	0.595047	0.573324	0.562581	0.667975	0.684201	0.726906	0.560742	0.370299
GSM1523796	0.90039	0.807735	0.69715	0.884535	0.822613	0.908769	0.609438	0.504339	0.694029	0.59033	0.642344	0.639711	0.607977	0.61402	0.587668	0.67991	0.590213	0.583795	0.662349	0.721807	0.704364	0.69478	0.437779
GSM1523797	0.504693	0.405248	0.562889	0.734658	0.261889	0.893633	0.578367	0.621989	0.82487	0.657788	0.605089	0.605759	0.586696	0.625184	0.557733	0.532288	0.505188	0.539235	0.583034	0.706664	0.700979	0.659958	0.261651
GSM1523798	0.752612	0.513393	0.627343	0.758661	0.665049	0.96316	0.92908	0.552869	0.731279	0.606262	0.637659	0.646994	0.581913	0.710443	0.565075	0.568441	0.578066	0.61923	0.676508	0.730634	0.781788	0.972056	0.592106
GSM1523799	0.72562	0.608375	0.550977	0.782298	0.501165	0.886948	0.599163	0.632846	0.798923	0.664373	0.677456	0.631055	0.570999	0.66663	0.550015	0.557427	0.574698	0.587061	0.659619	0.714524	0.7675	0.68747	0.462359
GSM1523800	0.591626	0.385215	0.682406	0.682832	0.387646	0.956073	0.77518	0.685303	0.853906	0.685174	0.643233	0.626697	0.594946	0.711395	0.55108	0.566444	0.574785	0.602077	0.679324	0.714001	0.789189	0.846033	0.53996
GSM1523801	0.574694	0.482779	0.578969	0.740797	0.404003	0.96388	0.73464	0.702558	0.850638	0.67727	0.639047	0.610311	0.618398	0.680616	0.547374	0.556628	0.524435	0.57047	0.628559	0.701254	0.750465	0.823606	0.431041
GSM1523802	0.598629	0.504831	0.610231	0.722888	0.446721	0.926158	0.512159	0.550548	0.75045	0.605352	0.60296	0.610309	0.569748	0.612481	0.535055	0.551356	0.527618	0.5613	0.614425	0.675215	0.696836	0.623919	0.35867
GSM1523803	0.600916	0.523955	0.656029	0.739629	0.616545	0.914528	0.581278	0.647591	0.833309	0.674716	0.627174	0.602454	0.612506	0.674291	0.554756	0.529249	0.530198	0.545372	0.606503	0.695892	0.727735	0.666082	0.385257
GSM1523804	0.752641	0.618213	0.717925	0.777146	0.529823	0.907089	0.539694	0.552631	0.747427	0.613342	0.632085	0.616009	0.575875	0.626433	0.572241	0.611773	0.570258	0.563116	0.621036	0.697194	0.697844	0.597648	0.357672
GSM1523805	0.756604	0.636476	0.679402	0.797618	0.636604	0.934326	0.780728	0.606787	0.780464	0.623531	0.635555	0.613607	0.594593	0.633834	0.60148	0.615909	0.562081	0.57738	0.671056	0.693265	0.718534	0.862825	0.43677
GSM1523806	0.617421	0.47969	0.65897	0.761285	0.403902	0.89645	0.587114	0.586054	0.770385	0.647077	0.632232	0.605476	0.59473	0.628374	0.57107	0.569656	0.554956	0.544916	0.607766	0.70648	0.728317	0.653929	0.347976
GSM1523807	0.71234	0.644871	0.640461	0.774705	0.576165	0.931863	0.579222	0.636174	0.780956	0.638513	0.66072	0.611686	0.60323	0.618614	0.571205	0.599253	0.544129	0.584088	0.6497	0.704694	0.731252	0.678382	0.380734
GSM1523808	0.693493	0.657408	0.618616	0.804171	0.46613	0.919415	0.641281	0.571524	0.737879	0.61191	0.642009	0.627189	0.58919	0.649212	0.582418	0.621423	0.564676	0.580039	0.64437	0.720759	0.733483	0.722869	0.400672
GSM1523809	0.62421	0.517374	0.642842	0.725495	0.460109	0.924742	0.727936	0.627636	0.80944	0.675308	0.633064	0.609607	0.605902	0.680505	0.568173	0.56709	0.558744	0.553915	0.6168	0.72349	0.760005	0.78879	0.362892
GSM1523810	0.753555	0.634157	0.725758	0.798357	0.483836	0.985575	0.857727	0.655601	0.818366	0.66657	0.643	0.615043	0.613658	0.663202	0.57836	0.623478	0.570249	0.61136	0.686905	0.714347	0.757421	0.923392	0.594713
GSM1523811	0.63081	0.560651	0.607362	0.763011	0.443767	0.956388	0.791651	0.656728	0.819543	0.655707	0.634105	0.598594	0.589462	0.664946	0.579389	0.574936	0.54489	0.583521	0.654453	0.71779	0.744058	0.866528	0.413478
GSM1523812	0.731272	0.62426	0.704626	0.77864	0.58553	0.961683	0.862469	0.613491	0.77458	0.635775	0.646178	0.626838	0.628449	0.674483	0.596485	0.625001	0.569737	0.592603	0.65851	0.697399	0.768473	0.925967	0.537726
GSM1523813	0.672295	0.676448	0.600037	0.809254	0.514511	0.860161	0.497077	0.699648	0.836707	0.654577	0.635741	0.61792	0.586047	0.6186	0.578578	0.629803	0.534476	0.538902	0.58786	0.689211	0.698109	0.598012	0.299149
GSM1523814	0.626521	0.494948	0.626464	0.722034	0.418923	0.862252	0.548946	0.6324	0.793725	0.658664	0.624017	0.637623	0.585694	0.638391	0.533481	0.564132	0.528841	0.5689	0.644937	0.685962	0.717066	0.655985	0.453923
GSM1523815	0.531711	0.486271	0.466885	0.774995	0.446533	0.903593	0.597503	0.676366	0.836647	0.665285	0.629321	0.636491	0.614889	0.66832	0.541301	0.566427	0.541643	0.528969	0.523283	0.678587	0.745585	0.690938	0.385589
GSM1523816	0.551357	0.458476	0.567236	0.732431	0.435483	0.922287	0.486151	0.623081	0.791575	0.643087	0.619015	0.614851	0.604404	0.632837	0.563826	0.543844	0.50579	0.526503	0.606199	0.689316	0.719302	0.552809	0.302264
GSM1523817	0.696707	0.533732	0.713197	0.770277	0.377336	0.889393	0.358563	0.610036	0.774783	0.622952	0.649267	0.668837	0.608002	0.692935	0.558734	0.57658	0.514076	0.543813	0.584399	0.680362	0.72966	0.404141	0.302735
GSM1523818	0.516557	0.431498	0.549395	0.703033	0.357893	0.923801	0.588046	0.604757	0.755941	0.627447	0.623197	0.590827	0.621333	0.65995	0.556965	0.529107	0.535729	0.544016	0.599198	0.70373	0.721065	0.661375	0.305561
GSM1523819	0.537618	0.482221	0.602104	0.766499	0.420971	0.847122	0.320808	0.548174	0.720892	0.593134	0.640293	0.612806	0.628829	0.617152	0.573694	0.56559	0.538386	0.512422	0.538091	0.666418	0.692414	0.341273	0.32719
GSM1523820	0.594178	0.398473	0.572887	0.70006	0.403338	0.914224	0.534628	0.57754	0.739603	0.604669	0.623065	0.622255	0.590508	0.620709	0.549315	0.547368	0.531959	0.581492	0.657897	0.693048	0.721444	0.554901	0.347256
GSM1523821	0.563489	0.435708	0.545043	0.708647	0.329471	0.970235	0.641767	0.680511	0.82881	0.663264	0.624783	0.601392	0.588753	0.629819	0.5421	0.535072	0.516467	0.570485	0.638662	0.684	0.710375	0.737791	0.349755
GSM1523822	0.764349	0.621088	0.725926	0.764611	0.507378	0.95161	0.755391	0.600708	0.772078	0.634896	0.640748	0.631435	0.587059	0.670099	0.583187	0.623149	0.582601	0.5897	0.649604	0.71969	0.762872	0.835791	0.442956
GSM1523823	0.715339	0.611443	0.671213	0.768203	0.399682	0.953231	0.809245	0.691555	0.825912	0.666616	0.643309	0.628479	0.611655	0.673496	0.584439	0.595492	0.557433	0.601903	0.686821	0.721304	0.763856	0.879852	0.48335
GSM1523824	0.633408	0.52832	0.628649	0.73675	0.384251	0.934116	0.708796	0.67201	0.80665	0.658518	0.624892	0.623654	0.610587	0.643176	0.558739	0.563931	0.516694	0.568033	0.639356	0.673872	0.752278	0.801417	0.409041
GSM1523825	0.652103	0.588386	0.543091	0.790031	0.291969	0.96511	0.277391	0.69097	0.811929	0.684762	0.660659	0.634802	0.636331	0.626495	0.588412	0.623126	0.547741	0.518148	0.569533	0.714528	0.731777	0.29152	0.267429
GSM1523826	0.66707	0.547667	0.590046	0.763026	0.462099	0.931356	0.696069	0.581761	0.782056	0.640192	0.620807	0.615477	0.554053	0.618218	0.566116	0.558105	0.533537	0.571359	0.654126	0.683823	0.7177	0.785533	0.359963
GSM1523827	0.701889	0.561659	0.701867	0.766141	0.518786	0.919715	0.709547	0.49984	0.692047	0.588726	0.639984	0.63116	0.597678	0.655605	0.588859	0.570838	0.559201	0.586777	0.636207	0.702981	0.732505	0.781226	0.428107
GSM1523828	0.681687	0.654502	0.669775	0.84801	0.464797	0.874817	0.491747	0.585963	0.786475	0.667252	0.647164	0.641015	0.582377	0.635092	0.593462	0.660434	0.57779	0.566223	0.654687	0.724919	0.710755	0.569546	0.398896
GSM1523829	0.548562	0.412669	0.544074	0.700714	0.357959	0.901556	0.533578	0.632241	0.795734	0.65049	0.628755	0.592991	0.557764	0.628129	0.545574	0.527172	0.52831	0.535105	0.589883	0.709369	0.752338	0.624283	0.311461
GSM1523830	0.599218	0.431184	0.585281	0.715678	0.390289	0.923415	0.708985	0.668423	0.81498	0.651882	0.619431	0.625043	0.620771	0.659756	0.55764	0.533774	0.518453	0.566721	0.613813	0.699662	0.746949	0.791721	0.451821
GSM1523831	0.546451	0.494532	0.564129	0.730705	0.41905	0.882896	0.468441	0.70172	0.84992	0.683379	0.637611	0.651545	0.612043	0.626741	0.606945	0.576143	0.5337	0.532548	0.571541	0.676566	0.728213	0.574041	0.386987
GSM1523832	0.763476	0.588232	0.674716	0.775969	0.453695	0.928141	0.613307	0.57817	0.756047	0.625904	0.626227	0.628759	0.583037	0.63897	0.589768	0.608944	0.541043	0.531139	0.597604	0.700712	0.733355	0.689469	0.299683
GSM1523833	0.632442	0.465636	0.622233	0.690682	0.474188	0.898046	0.475882	0.670282	0.812097	0.667163	0.640545	0.624334	0.606146	0.638257	0.566607	0.558552	0.564519	0.531509	0.615425	0.704315	0.716882	0.50635	0.342732
GSM1523834	0.82998	0.663092	0.726479	0.793903	0.535909	0.920116	0.670294	0.520755	0.694085	0.586412	0.63857	0.615133	0.585903	0.628482	0.57914	0.609075	0.569672	0.594581	0.661981	0.712967	0.721168	0.756575	0.46414
GSM1523835	0.696965	0.729328	0.691645	0.837854	0.411055	0.915719	0.343794	0.617377	0.787184	0.643998	0.631032	0.6209	0.618054	0.611409	0.591224	0.625039	0.540745	0.538149	0.579377	0.664405	0.678192	0.43429	0.347228
GSM1523836	0.774469	0.543042	0.760209	0.739709	0.426064	0.909926	0.61247	0.665855	0.818578	0.656792	0.631209	0.63805	0.586161	0.653109	0.578412	0.58898	0.528795	0.590828	0.661838	0.706043	0.749704	0.703514	0.418382
GSM1523837	0.579794	0.47216	0.61421	0.696302	0.335269	0.83859	0.357563	0.677073	0.791567	0.63273	0.629333	0.627732	0.606315	0.590325	0.573174	0.533825	0.522997	0.520779	0.581666	0.651225	0.66639	0.417908	0.273891
GSM1523838	0.723659	0.615213	0.713932	0.766587	0.391241	0.934828	0.822081	0.648369	0.806137	0.654459	0.63804	0.619995	0.60079	0.666987	0.558344	0.613216	0.566535	0.60233	0.678847	0.721889	0.742521	0.900338	0.508157
GSM1523839	0.815901	0.738673	0.71089	0.811807	0.551363	0.891666	0.378295	0.582579	0.735743	0.617032	0.646056	0.61485	0.581565	0.609185	0.59628	0.643336	0.554281	0.567924	0.659067	0.698748	0.702222	0.389941	0.419581
GSM1523840	0.578334	0.615345	0.545195	0.718119	0.344152	0.855659	0.607538	0.657417	0.829783	0.657086	0.620545	0.609847	0.534737	0.643845	0.555834	0.524314	0.513794	0.522461	0.58793	0.668131	0.734502	0.694727	0.391907
GSM1523841	0.654742	0.534457	0.672378	0.721389	0.580918	0.918828	0.538713	0.625805	0.797998	0.651914	0.636619	0.622726	0.614142	0.6509	0.558821	0.579528	0.545404	0.560251	0.602683	0.678318	0.740482	0.634178	0.446269
GSM1523842	0.575587	0.521139	0.587537	0.749125	0.467461	0.918785	0.675093	0.590091	0.770165	0.63553	0.632913	0.616378	0.582841	0.650304	0.566828	0.547142	0.529225	0.537923	0.607338	0.695888	0.749232	0.757269	0.397829
GSM1523843	0.655349	0.610419	0.648391	0.78411	0.610992	0.922927	0.537554	0.597013	0.769224	0.63303	0.623115	0.613377	0.587514	0.605438	0.571295	0.601136	0.546361	0.551522	0.628664	0.673707	0.704594	0.634736	0.379825
GSM1523844	0.777763	0.711479	0.674524	0.877983	0.428525	0.873993	0.346571	0.651682	0.77472	0.644265	0.652139	0.615461	0.616685	0.630881	0.623751	0.672067	0.57492	0.518911	0.603648	0.695215	0.702604	0.396405	0.297959
GSM1523845	0.760108	0.632054	0.722077	0.818505	0.563056	0.947661	0.648103	0.64552	0.777489	0.620978	0.626612	0.619535	0.608268	0.654108	0.577272	0.636226	0.553761	0.605448	0.672771	0.713112	0.747599	0.743204	0.551106
GSM1523846	0.725476	0.598004	0.750873	0.758726	0.626271	0.945963	0.777558	0.608733	0.76079	0.635012	0.653767	0.651972	0.629516	0.672731	0.589024	0.616503	0.596775	0.581739	0.648161	0.709939	0.772052	0.860764	0.430337
GSM1523847	0.422378	0.507884	0.629692	0.733425	0.443226	0.928559	0.67994	0.699388	0.811054	0.654066	0.626161	0.601865	0.603789	0.654459	0.556631	0.592476	0.536917	0.56928	0.635345	0.695714	0.718252	0.76636	0.423831
GSM1523848	0.809224	0.670302	0.760166	0.789162	0.539098	0.983927	0.970959	0.568613	0.758766	0.632609	0.653284	0.644557	0.612475	0.71017	0.577762	0.617301	0.581008	0.630925	0.675067	0.722633	0.787076	0.992946	0.669855
GSM1523849	0.809871	0.713518	0.710156	0.856465	0.64633	0.949994	0.677033	0.666774	0.802898	0.66394	0.650163	0.635676	0.609395	0.642913	0.622465	0.646398	0.562978	0.577316	0.645313	0.723486	0.737464	0.753129	0.428661
GSM1523850	0.784043	0.649111	0.696634	0.841852	0.683289	0.907821	0.590979	0.487579	0.68541	0.58862	0.646035	0.642309	0.611845	0.645888	0.605496	0.634005	0.577786	0.535511	0.6049	0.709878	0.71536	0.671752	0.307015
GSM1523851	0.595809	0.57483	0.586612	0.749256	0.396259	0.957463	0.674478	0.715889	0.858972	0.677259	0.632134	0.614775	0.609261	0.639739	0.568499	0.593162	0.550109	0.592166	0.670429	0.714305	0.723829	0.761782	0.398967
GSM1523852	0.585526	0.542886	0.576785	0.724876	0.400957	0.927514	0.683554	0.522629	0.713975	0.581823	0.623015	0.608523	0.569549	0.640632	0.572232	0.533572	0.518779	0.560866	0.635958	0.686926	0.724296	0.772856	0.333938
GSM1523853	0.555315	0.545935	0.567014	0.737766	0.333592	0.89978	0.578375	0.676807	0.812866	0.651114	0.625765	0.611519	0.570519	0.640477	0.573157	0.539532	0.510376	0.527947	0.60603	0.680291	0.72361	0.663129	0.303602
GSM1523854	0.743635	0.637194	0.646686	0.75666	0.536125	0.941572	0.786404	0.608312	0.780011	0.632671	0.631749	0.593304	0.583754	0.653619	0.585945	0.607627	0.545731	0.572229	0.636527	0.707113	0.76026	0.854892	0.413453
GSM1523855	0.510286	0.435018	0.546596	0.710706	0.288269	0.838145	0.451809	0.578822	0.756402	0.639358	0.635222	0.610014	0.625731	0.589538	0.587021	0.524071	0.513979	0.514974	0.59398	0.657472	0.712057	0.483251	0.285479
GSM1523856	0.726261	0.617621	0.605554	0.789224	0.413323	0.858668	0.722328	0.691287	0.853003	0.657827	0.645562	0.613678	0.587155	0.668518	0.574039	0.60731	0.525136	0.554846	0.64908	0.718813	0.75531	0.807607	0.392285
GSM1523857	0.722807	0.657655	0.706393	0.854109	0.541166	0.912259	0.501492	0.490758	0.72695	0.610113	0.641425	0.642479	0.609653	0.602566	0.611816	0.654575	0.561557	0.545793	0.608798	0.688983	0.699649	0.620288	0.300225
GSM1523858	0.713907	0.717879	0.694127	0.872247	0.734095	0.817668	0.422278	0.309584	0.550717	0.534264	0.663263	0.663441	0.597568	0.615706	0.622867	0.645368	0.622803	0.506782	0.575695	0.693426	0.665244	0.504635	0.262839
GSM1523859	0.641469	0.597378	0.616632	0.770567	0.567641	0.914153	0.49272	0.561028	0.753484	0.621442	0.630391	0.628059	0.602611	0.63885	0.568263	0.591477	0.542152	0.561823	0.640337	0.693296	0.701683	0.592985	0.335379
GSM1523860	0.698242	0.576366	0.614117	0.787593	0.401963	0.948181	0.76306	0.674633	0.829413	0.68113	0.622316	0.619851	0.603379	0.674245	0.57076	0.604136	0.549512	0.59505	0.681147	0.731372	0.752815	0.842151	0.470609
GSM1523861	0.667175	0.476221	0.639682	0.747132	0.447427	0.94332	0.724646	0.591991	0.773612	0.622245	0.614371	0.623509	0.574679	0.624736	0.595878	0.577091	0.523357	0.568925	0.635374	0.698866	0.708982	0.822413	0.388882
GSM1523862	0.7529	0.663002	0.700427	0.845992	0.622982	0.879218	0.604672	0.430169	0.63355	0.556862	0.657733	0.65366	0.585442	0.625879	0.600315	0.639792	0.591837	0.546967	0.57863	0.707442	0.705325	0.702328	0.379087
GSM1523863	0.631679	0.463088	0.633497	0.725006	0.342269	0.984664	0.905614	0.678813	0.842298	0.68443	0.628681	0.61651	0.605424	0.712386	0.569462	0.563914	0.55425	0.604446	0.666097	0.730081	0.786759	0.957425	0.572322
GSM1523864	0.577125	0.526055	0.599021	0.710901	0.298519	0.938891	0.516293	0.622831	0.788332	0.647763	0.645543	0.633552	0.596907	0.67401	0.557686	0.58746	0.592424	0.551341	0.607287	0.723044	0.736883	0.610087	0.306713
GSM1523865	0.659036	0.566579	0.51367	0.750434	0.431296	0.910386	0.490224	0.675604	0.836723	0.660345	0.620119	0.616914	0.636069	0.633424	0.562568	0.585593	0.528539	0.524448	0.561386	0.671656	0.716504	0.573747	0.328321
GSM1523866	0.77073	0.764805	0.643539	0.770969	0.633451	0.923836	0.753527	0.552829	0.768747	0.625175	0.648872	0.630807	0.631743	0.661814	0.598389	0.660195	0.572066	0.580811	0.665539	0.69427	0.731836	0.839799	0.471869
GSM1523867	0.580677	0.485859	0.54973	0.726587	0.372574	0.945073	0.601566	0.647374	0.819894	0.663517	0.616111	0.614877	0.578048	0.664921	0.5793	0.558869	0.507955	0.553348	0.630773	0.70982	0.744134	0.652576	0.331778
GSM1523868	0.728662	0.550253	0.635181	0.792777	0.549486	0.964988	0.809858	0.697092	0.836855	0.682559	0.654619	0.650396	0.626317	0.698634	0.571225	0.63079	0.590793	0.608387	0.684137	0.735736	0.762282	0.868389	0.553563
GSM1523869	0.60877	0.49803	0.599074	0.705936	0.434877	0.914844	0.54288	0.571687	0.757026	0.606167	0.633704	0.638825	0.592207	0.630894	0.572187	0.569178	0.541639	0.543951	0.5917	0.694509	0.722828	0.618624	0.353012
GSM1523870	0.612585	0.506819	0.587854	0.734072	0.34218	0.959779	0.759305	0.711975	0.856527	0.67689	0.617106	0.605074	0.605831	0.682328	0.54505	0.569261	0.532129	0.570716	0.64043	0.700191	0.76706	0.837507	0.422023
GSM1523871	0.593943	0.517061	0.579808	0.736763	0.354187	0.919772	0.589616	0.658667	0.826404	0.654049	0.624791	0.61344	0.591811	0.62292	0.585957	0.573273	0.537367	0.553595	0.628083	0.666868	0.69228	0.656518	0.399291
GSM1523872	0.783387	0.684812	0.677988	0.804316	0.418648	0.935553	0.599573	0.539071	0.717986	0.606119	0.651824	0.636968	0.603194	0.639488	0.598762	0.636795	0.574432	0.589605	0.645501	0.702632	0.719345	0.68974	0.44089
GSM1523873	0.59402	0.494821	0.606959	0.720512	0.410767	0.966851	0.883499	0.614916	0.790028	0.637299	0.618302	0.613194	0.62514	0.664057	0.575826	0.588187	0.516036	0.592982	0.646052	0.665163	0.732715	0.927288	0.563899
GSM1523874	0.705963	0.605616	0.651734	0.839377	0.57221	0.891833	0.534963	0.621243	0.778626	0.644229	0.644114	0.617399	0.609794	0.667378	0.587725	0.641467	0.553099	0.565662	0.654647	0.707138	0.741554	0.631739	0.385059
GSM1523875	0.539527	0.484006	0.505151	0.710761	0.374074	0.883879	0.461232	0.640285	0.848333	0.664147	0.607099	0.612502	0.621743	0.659392	0.561701	0.533472	0.494892	0.514816	0.588109	0.671545	0.762913	0.509596	0.332537
GSM1523876	0.553351	0.492978	0.517981	0.736725	0.371867	0.974108	0.645671	0.666697	0.808031	0.650659	0.617925	0.609672	0.579618	0.654374	0.573748	0.552819	0.528573	0.558415	0.646725	0.697613	0.735353	0.710261	0.327638
GSM1523877	0.575776	0.465694	0.605398	0.678234	0.354931	0.852621	0.153975	0.597135	0.815281	0.641929	0.622135	0.600924	0.6181	0.609071	0.556466	0.529835	0.49726	0.488969	0.564881	0.649905	0.696435	0.149023	0.238221
GSM1523878	0.607421	0.488173	0.641028	0.709199	0.520896	0.937022	0.763439	0.597784	0.763012	0.629089	0.63111	0.627897	0.592246	0.673369	0.562126	0.557935	0.547788	0.579273	0.618851	0.698776	0.754176	0.843051	0.474084
GSM1523879	0.576636	0.481953	0.582439	0.730259	0.316272	0.935861	0.540361	0.598603	0.796331	0.650888	0.622991	0.625143	0.601139	0.627203	0.559378	0.530554	0.528363	0.527204	0.60073	0.691691	0.728325	0.592814	0.333135
GSM1523880	0.576058	0.471437	0.575253	0.705108	0.363495	0.953054	0.761088	0.718842	0.856779	0.672676	0.616005	0.614846	0.586777	0.660457	0.548536	0.531804	0.499455	0.566321	0.631014	0.685622	0.736614	0.837204	0.42726
GSM1523881	0.631325	0.488664	0.648013	0.74577	0.2669	0.896047	0.412974	0.578652	0.750764	0.654621	0.647175	0.623039	0.601347	0.649406	0.565757	0.597061	0.575049	0.540586	0.617539	0.699471	0.728276	0.47999	0.280545
GSM1523882	0.458683	0.300548	0.561282	0.652048	0.334751	0.948017	0.693618	0.66557	0.82952	0.675056	0.623142	0.605315	0.625025	0.648182	0.535869	0.539811	0.503426	0.570376	0.607961	0.667462	0.733925	0.7795	0.41518
GSM1523883	0.565508	0.417657	0.615378	0.715321	0.341378	0.962862	0.720784	0.617728	0.791745	0.64886	0.625284	0.609643	0.5898	0.634522	0.55441	0.549926	0.5296	0.579728	0.633111	0.679984	0.724947	0.816244	0.415086
GSM1523884	0.690522	0.591245	0.6944	0.784797	0.598237	0.909475	0.517901	0.566376	0.75654	0.624309	0.638815	0.630308	0.583307	0.630011	0.585925	0.611897	0.567638	0.552744	0.623896	0.708699	0.709393	0.613627	0.363109
GSM1523885	0.642633	0.519551	0.614518	0.71691	0.326128	0.983071	0.795159	0.679367	0.81653	0.665335	0.624283	0.6196	0.601997	0.676853	0.571858	0.588658	0.555164	0.588708	0.653917	0.716455	0.755498	0.870715	0.433209
GSM1523886	0.863691	0.802031	0.708485	0.877431	0.827354	0.922649	0.766692	0.556456	0.716299	0.591491	0.654062	0.654307	0.600224	0.655143	0.613497	0.656826	0.572053	0.612837	0.719065	0.725326	0.736748	0.856931	0.493546
GSM1523887	0.67238	0.657389	0.60891	0.782771	0.382683	0.95528	0.758814	0.602711	0.798442	0.65024	0.64061	0.607157	0.600571	0.620118	0.548484	0.599103	0.578999	0.572218	0.651371	0.686871	0.719672	0.846119	0.505238
GSM1523888	0.706686	0.53184	0.689057	0.742665	0.348815	0.98108	0.919736	0.68274	0.845741	0.676168	0.625534	0.615263	0.592805	0.688729	0.557916	0.549381	0.527054	0.588835	0.65824	0.703381	0.771508	0.96809	0.542824
GSM1523889	0.4834	0.412856	0.564393	0.650894	0.245823	0.919966	0.419633	0.59756	0.796675	0.681483	0.622403	0.593669	0.574539	0.652467	0.540654	0.493656	0.543943	0.515285	0.59238	0.71622	0.688632	0.488885	0.2247
GSM1523890	0.598048	0.463988	0.616763	0.750008	0.468023	0.902014	0.453022	0.549102	0.744063	0.619075	0.627668	0.617411	0.575348	0.641849	0.570471	0.535182	0.549729	0.535456	0.611677	0.711685	0.722004	0.507739	0.325153
GSM1523891	0.820389	0.7436	0.700191	0.832468	0.614894	0.939263	0.437173	0.631597	0.761109	0.638923	0.63849	0.622068	0.595067	0.599669	0.576974	0.629852	0.571571	0.584073	0.687322	0.710046	0.708751	0.463889	0.40595
GSM1523892	0.587158	0.60521	0.588899	0.741946	0.358339	0.945051	0.704672	0.569241	0.752053	0.609893	0.642584	0.582021	0.600149	0.624725	0.575829	0.605507	0.568606	0.560916	0.635563	0.69261	0.731265	0.790555	0.420361
GSM1523893	0.563381	0.471008	0.595299	0.742768	0.403441	0.917251	0.4296	0.712547	0.825665	0.67199	0.624798	0.615629	0.606806	0.619063	0.582786	0.53575	0.528234	0.528006	0.613851	0.678033	0.728915	0.475285	0.30622
GSM1523894	0.607221	0.49193	0.628523	0.735982	0.393211	0.903089	0.480225	0.658076	0.812649	0.664777	0.644403	0.63721	0.612371	0.6324	0.571319	0.577587	0.534689	0.533331	0.622574	0.675566	0.702184	0.552864	0.294489
GSM1523895	0.520809	0.412223	0.571979	0.705936	0.267893	0.941462	0.619858	0.691704	0.837531	0.673912	0.584875	0.587383	0.605915	0.587644	0.571847	0.545204	0.486111	0.530844	0.609023	0.651102	0.690514	0.707737	0.393413
GSM1523896	0.700365	0.488485	0.679986	0.69122	0.543624	0.953608	0.791435	0.593754	0.754593	0.622067	0.631218	0.63811	0.611997	0.664228	0.558669	0.592188	0.549042	0.577564	0.623996	0.698471	0.765159	0.864655	0.470614
GSM1523897	0.531641	0.406388	0.592099	0.678585	0.318514	0.914414	0.377448	0.705726	0.829257	0.687885	0.644038	0.617117	0.569213	0.655452	0.524506	0.547761	0.543753	0.513213	0.618795	0.68757	0.72952	0.407576	0.32011
GSM1523898	0.594319	0.511578	0.617583	0.76725	0.298054	0.902229	0.52234	0.649568	0.792189	0.644237	0.637776	0.609887	0.604644	0.613705	0.608988	0.575404	0.531962	0.530622	0.633131	0.679483	0.719968	0.590805	0.277363
GSM1523899	0.513551	0.378792	0.611183	0.71235	0.307094	0.921981	0.666098	0.551806	0.710944	0.587131	0.62366	0.6015	0.614304	0.655453	0.555741	0.567907	0.549194	0.526228	0.579251	0.672405	0.702795	0.736103	0.342097
GSM1523901	0.686219	0.495493	0.667252	0.753913	0.343022	0.944674	0.747969	0.714037	0.859387	0.679138	0.616964	0.597621	0.593814	0.64554	0.566998	0.599727	0.527219	0.575038	0.65885	0.705064	0.752442	0.836965	0.456722
GSM1523903	0.704975	0.681447	0.686632	0.810181	0.464086	0.907358	0.416848	0.63784	0.773823	0.618739	0.604667	0.623681	0.619363	0.616612	0.579828	0.644992	0.557087	0.534485	0.604197	0.676818	0.710311	0.483565	0.271142
GSM1523904	0.594831	0.465388	0.659278	0.740145	0.47741	0.911229	0.657492	0.619936	0.781845	0.647835	0.632104	0.620698	0.5887	0.633825	0.588816	0.578235	0.545226	0.5462	0.610075	0.70487	0.728664	0.745871	0.365497
GSM1523905	0.625368	0.506721	0.612602	0.748035	0.553811	0.938173	0.460437	0.626153	0.785816	0.635977	0.639154	0.613978	0.610227	0.611901	0.567179	0.579972	0.543099	0.531882	0.612077	0.683267	0.707268	0.528808	0.293715
GSM1523906	0.714948	0.585837	0.711338	0.737144	0.504847	0.956359	0.8434	0.643727	0.810257	0.652087	0.663371	0.643561	0.61263	0.672582	0.576091	0.598974	0.566907	0.600215	0.645106	0.709145	0.767174	0.908831	0.572304
GSM1523908	0.773768	0.583122	0.725695	0.741651	0.382599	0.979453	0.771565	0.670659	0.794304	0.643112	0.668686	0.613416	0.597266	0.649934	0.586	0.631671	0.593233	0.599301	0.679441	0.722008	0.751163	0.836289	0.550272
GSM1523909	0.626862	0.523058	0.548545	0.767658	0.287724	0.948958	0.870007	0.741027	0.855279	0.692442	0.643876	0.619756	0.593083	0.684723	0.582592	0.60849	0.568122	0.600587	0.671209	0.735901	0.778466	0.934351	0.49938
GSM1523910	0.537456	0.422851	0.525161	0.692206	0.373742	0.981199	0.776403	0.718019	0.858835	0.678221	0.633495	0.624945	0.602579	0.66021	0.553084	0.553828	0.550944	0.578561	0.658102	0.704633	0.753502	0.859703	0.433707
GSM1523911	0.604566	0.456211	0.517405	0.767056	0.453632	0.97174	0.614362	0.614831	0.769651	0.662259	0.651102	0.62236	0.633937	0.689399	0.584273	0.59876	0.551265	0.560082	0.654004	0.721007	0.756289	0.669227	0.368873
GSM1523918	0.596003	0.665693	0.639802	0.868427	0.666209	0.899121	0.523405	0.542013	0.739794	0.620295	0.648427	0.637422	0.607534	0.594176	0.619768	0.638761	0.572584	0.537746	0.577426	0.695288	0.674696	0.630104	0.308961
GSM1523919	0.61785	0.460263	0.616302	0.756643	0.377895	0.943763	0.66019	0.44462	0.663878	0.577542	0.621998	0.600648	0.597437	0.648855	0.563285	0.572506	0.548264	0.550903	0.58775	0.694381	0.72797	0.75492	0.357355
GSM1523920	0.616112	0.495104	0.665027	0.756274	0.405554	0.911579	0.622924	0.437565	0.610651	0.531241	0.627083	0.607487	0.595351	0.627521	0.577686	0.541348	0.562852	0.561706	0.618645	0.688012	0.69574	0.692123	0.343282
GSM1523921	0.67712	0.590161	0.649124	0.767595	0.355506	0.92577	0.67545	0.589021	0.796131	0.624957	0.637222	0.613757	0.596457	0.604472	0.551726	0.608482	0.545277	0.546435	0.609949	0.694528	0.726803	0.781196	0.392324
GSM1523922	0.705949	0.608937	0.668603	0.78787	0.364541	0.940266	0.516228	0.631513	0.803123	0.640529	0.620533	0.615865	0.613072	0.611727	0.584182	0.611808	0.527277	0.580461	0.656977	0.709784	0.732426	0.618675	0.331303
GSM1523923	0.592048	0.463878	0.5905	0.734244	0.421816	0.911164	0.517669	0.669548	0.814639	0.648483	0.652226	0.607925	0.572933	0.617767	0.564759	0.557416	0.54241	0.550192	0.608499	0.675884	0.7078	0.570118	0.318685
GSM1523924	0.697265	0.575905	0.674053	0.759268	0.504847	0.912957	0.627742	0.500691	0.70643	0.577696	0.623237	0.621537	0.582197	0.618513	0.579332	0.588904	0.548631	0.551781	0.597105	0.686233	0.704141	0.722612	0.315355
GSM1523925	0.579072	0.466041	0.56771	0.745873	0.456768	0.87954	0.436594	0.627069	0.79733	0.659846	0.638795	0.592946	0.569374	0.641475	0.575016	0.566894	0.537928	0.509513	0.556406	0.686703	0.750753	0.551186	0.359192
GSM1523926	0.413521	0.384781	0.570217	0.655967	0.354522	0.921383	0.277996	0.607888	0.777386	0.634024	0.60728	0.615137	0.579072	0.674395	0.532611	0.511037	0.528875	0.50174	0.57643	0.674601	0.697044	0.295053	0.279811
GSM1523927	0.596018	0.522581	0.624508	0.735467	0.516693	0.901349	0.307483	0.567517	0.751664	0.619782	0.640319	0.63809	0.600947	0.615234	0.560227	0.568673	0.520107	0.522432	0.633958	0.6792	0.700654	0.320237	0.285173
GSM1523928	0.599849	0.51674	0.641964	0.750132	0.385816	0.906762	0.459139	0.612357	0.748795	0.616298	0.648024	0.63382	0.666644	0.615177	0.563278	0.594029	0.552144	0.5414	0.611633	0.692017	0.726825	0.573343	0.32234
GSM1523929	0.573192	0.482499	0.593514	0.749811	0.409021	0.939352	0.74156	0.662225	0.819995	0.663935	0.634716	0.600442	0.611444	0.674996	0.544436	0.571227	0.539149	0.55921	0.642456	0.695341	0.755348	0.819965	0.438946
GSM1523930	0.663598	0.637926	0.70337	0.802321	0.577744	0.922162	0.510942	0.538261	0.723561	0.605834	0.648155	0.648546	0.653036	0.591474	0.582919	0.642626	0.564182	0.53352	0.6368	0.663471	0.668624	0.604672	0.325046
GSM1523931	0.561226	0.436275	0.652859	0.740865	0.45266	0.976821	0.905751	0.57714	0.73196	0.618165	0.644697	0.637164	0.638297	0.680598	0.540109	0.553754	0.572312	0.586078	0.63347	0.697674	0.753403	0.958206	0.502212
GSM1523932	0.498116	0.440783	0.555908	0.709274	0.222734	0.928088	0.494364	0.662838	0.806356	0.658559	0.626528	0.591213	0.609912	0.584049	0.571617	0.537279	0.51926	0.52868	0.600308	0.658407	0.691581	0.567695	0.302217
GSM1523933	0.607121	0.625867	0.509256	0.739749	0.323704	0.886917	0.571734	0.585475	0.775302	0.663634	0.641884	0.601162	0.624977	0.64414	0.576182	0.600382	0.528944	0.572637	0.669559	0.718193	0.70664	0.644872	0.380724
GSM1523934	0.618207	0.515004	0.623974	0.759697	0.513416	0.881035	0.305514	0.545487	0.731731	0.616695	0.617674	0.617246	0.630196	0.635179	0.545959	0.606288	0.548195	0.507621	0.571716	0.676386	0.686447	0.363777	0.245347
GSM1523935	0.880809	0.896278	0.736977	0.876958	0.744483	0.906427	0.463866	0.525306	0.671901	0.589849	0.669395	0.658263	0.639353	0.603644	0.602843	0.687127	0.605906	0.57261	0.68605	0.722299	0.687592	0.520408	0.401685
GSM1523936	0.630092	0.57328	0.631159	0.804794	0.657601	0.891874	0.488683	0.444454	0.667711	0.557585	0.639569	0.630575	0.611057	0.610739	0.580247	0.62481	0.569746	0.53884	0.616016	0.676242	0.694715	0.551171	0.326038
GSM1523937	0.533788	0.507663	0.54549	0.770042	0.487805	0.960591	0.681533	0.551286	0.698075	0.588736	0.633079	0.632503	0.62131	0.642771	0.572078	0.603421	0.573328	0.562751	0.62039	0.69733	0.70448	0.776328	0.369025
GSM1523938	0.808564	0.713148	0.741055	0.863787	0.707535	0.876924	0.535389	0.481114	0.6515	0.574554	0.649365	0.646999	0.636907	0.613079	0.626971	0.666391	0.606799	0.538349	0.577618	0.691676	0.685445	0.643936	0.304927
GSM1523939	0.769212	0.671282	0.752407	0.855472	0.658352	0.886926	0.508834	0.308343	0.545817	0.511312	0.64548	0.654539	0.625695	0.592737	0.610599	0.65203	0.596906	0.515754	0.580614	0.681612	0.665385	0.597134	0.354286
GSM1523940	0.531899	0.530694	0.477225	0.749903	0.513944	0.888439	0.367025	0.627342	0.771567	0.66287	0.642418	0.611687	0.634293	0.64628	0.558759	0.594197	0.533193	0.504131	0.558913	0.691115	0.725098	0.424062	0.26463
GSM1523941	0.661367	0.553589	0.612199	0.784496	0.427283	0.921947	0.870629	0.654213	0.817968	0.659789	0.650446	0.630496	0.607139	0.709398	0.56762	0.602729	0.582071	0.575483	0.639911	0.724477	0.803848	0.949124	0.500598
GSM1523942	0.53913	0.551135	0.531031	0.764221	0.539142	0.914237	0.407499	0.5581	0.754488	0.632183	0.629963	0.620201	0.613191	0.651402	0.55764	0.609973	0.533229	0.528829	0.608929	0.698375	0.709596	0.472053	0.339544
GSM1523943	0.63395	0.528251	0.629415	0.727022	0.509908	0.954508	0.558251	0.580795	0.744699	0.627309	0.633323	0.611917	0.609824	0.633887	0.565403	0.593183	0.535955	0.547281	0.621257	0.701796	0.726795	0.651799	0.339004
GSM1523944	0.558373	0.420851	0.518252	0.69812	0.459294	0.968443	0.824314	0.607714	0.782198	0.640758	0.608853	0.611454	0.570686	0.704939	0.561546	0.582043	0.533477	0.599763	0.618296	0.730441	0.762315	0.91329	0.538228
GSM1523945	0.777684	0.762289	0.69131	0.880243	0.708672	0.874564	0.464589	0.587921	0.737106	0.627098	0.652245	0.644633	0.603542	0.61573	0.618676	0.653711	0.578508	0.56292	0.682207	0.704882	0.684737	0.47769	0.376365
GSM1523946	0.597693	0.468173	0.568702	0.746274	0.509332	0.927348	0.527029	0.644215	0.796601	0.642639	0.632319	0.607674	0.607792	0.638775	0.559943	0.56102	0.534234	0.559475	0.627288	0.686822	0.720771	0.616168	0.34451
GSM1523947	0.545347	0.448153	0.605871	0.668861	0.29045	0.9455	0.674288	0.74204	0.856341	0.675795	0.606208	0.619254	0.593915	0.643897	0.549815	0.540587	0.462869	0.55454	0.619531	0.6742	0.715029	0.760063	0.419099
GSM1523948	0.713877	0.636387	0.695811	0.819399	0.412112	0.842497	0.48116	0.446135	0.642144	0.552925	0.638534	0.640451	0.614115	0.641488	0.583651	0.616435	0.570546	0.519356	0.582403	0.675001	0.693184	0.554045	0.322905
GSM1523949	0.749047	0.584574	0.748414	0.837461	0.6705	0.895765	0.583551	0.418392	0.589013	0.545875	0.649996	0.643937	0.621723	0.615522	0.602322	0.628352	0.619617	0.536632	0.587157	0.674481	0.684822	0.667442	0.300984
GSM1523950	0.41986	0.339641	0.54336	0.60909	0.327144	0.958836	0.499035	0.703878	0.84858	0.697213	0.609929	0.58572	0.621781	0.615064	0.532887	0.483527	0.469067	0.513302	0.584174	0.674022	0.700354	0.543563	0.325667
GSM1523951	0.685549	0.530238	0.690114	0.748696	0.495453	0.958786	0.865733	0.565704	0.753598	0.608082	0.651499	0.631051	0.63473	0.677488	0.567131	0.589986	0.556376	0.579368	0.59598	0.697687	0.757953	0.922013	0.532597
GSM1523952	0.739886	0.61549	0.696269	0.760273	0.497661	0.912515	0.677969	0.576372	0.751864	0.609838	0.630393	0.624153	0.584178	0.651367	0.572836	0.595525	0.570598	0.565264	0.635638	0.705751	0.722328	0.751084	0.339565
GSM1523953	0.374949	0.348488	0.532523	0.681504	0.311756	0.843434	0.23488	0.606767	0.800812	0.66031	0.638152	0.615185	0.629521	0.622447	0.521272	0.520634	0.512626	0.439742	0.51537	0.678646	0.729843	0.234628	0.21991
GSM1523954	0.418734	0.404933	0.478616	0.727247	0.256615	0.923128	0.444093	0.404689	0.609768	0.531646	0.603918	0.601148	0.612274	0.657398	0.565585	0.516675	0.535075	0.503839	0.553784	0.692284	0.702586	0.445841	0.253877
GSM1523955	0.570609	0.466303	0.631998	0.735278	0.462112	0.82411	0.514864	0.262072	0.579403	0.504569	0.636839	0.632102	0.618102	0.589905	0.575127	0.533932	0.571744	0.487409	0.575288	0.65027	0.668267	0.577986	0.269074
GSM1523956	0.638134	0.542307	0.572835	0.749954	0.344453	0.909522	0.567359	0.602137	0.821688	0.646947	0.650348	0.610675	0.608338	0.632774	0.576045	0.598307	0.53836	0.528412	0.614705	0.688815	0.719647	0.655002	0.297885
GSM1523957	0.50635	0.49719	0.589024	0.681009	0.427039	0.882467	0.279429	0.578523	0.722387	0.614353	0.611944	0.607385	0.640817	0.653482	0.538749	0.559953	0.531698	0.500545	0.559757	0.698753	0.691746	0.372342	0.240699
GSM1523958	0.678558	0.591985	0.635642	0.761276	0.463876	0.956956	0.820418	0.554091	0.717142	0.590526	0.63229	0.62065	0.588336	0.675634	0.582444	0.586384	0.560021	0.600317	0.665197	0.702203	0.743471	0.901472	0.453953
GSM1523959	0.494267	0.463338	0.516935	0.747444	0.308768	0.900892	0.259858	0.671619	0.812629	0.663999	0.617079	0.620308	0.620593	0.627993	0.551788	0.547374	0.515717	0.482194	0.549429	0.682327	0.72174	0.286399	0.274626
GSM1523960	0.572362	0.527857	0.58384	0.746646	0.39295	0.933085	0.23394	0.622099	0.796289	0.65452	0.624066	0.614602	0.626356	0.593105	0.543612	0.57553	0.541414	0.490618	0.573373	0.653891	0.687559	0.236426	0.25605
GSM1523961	0.560817	0.484136	0.581534	0.680457	0.359205	0.948822	0.566571	0.652269	0.799896	0.654045	0.618241	0.604793	0.605345	0.63788	0.553093	0.576819	0.532249	0.521682	0.582896	0.698479	0.735348	0.633302	0.268116
GSM1523962	0.774384	0.680318	0.675194	0.864622	0.637515	0.87814	0.454478	0.404546	0.658335	0.562526	0.642877	0.640958	0.58675	0.620245	0.622485	0.648011	0.583654	0.533331	0.605548	0.695565	0.691274	0.512677	0.318165
GSM1523963	0.581657	0.506328	0.62203	0.754857	0.416114	0.914407	0.525268	0.495662	0.733976	0.591574	0.625886	0.613172	0.585747	0.650153	0.563604	0.572136	0.547574	0.541829	0.597393	0.695878	0.726158	0.6056	0.29364
GSM1523964	0.560091	0.490883	0.572541	0.727571	0.340459	0.943835	0.49505	0.640508	0.79228	0.640973	0.616822	0.619009	0.60925	0.631533	0.566542	0.572936	0.54072	0.53269	0.590736	0.706457	0.691751	0.58846	0.271978
GSM1523965	0.770727	0.719161	0.656777	0.856009	0.815462	0.902999	0.582831	0.620446	0.762215	0.634852	0.659879	0.65296	0.622429	0.667113	0.616133	0.671449	0.591323	0.591101	0.706769	0.747026	0.746873	0.646076	0.431503
GSM1523966	0.537	0.460046	0.585192	0.731856	0.210844	0.928345	0.564245	0.689547	0.823671	0.671663	0.615231	0.593759	0.600911	0.59462	0.553878	0.546695	0.52004	0.548718	0.604531	0.66231	0.701931	0.67707	0.355649
GSM1523967	0.596534	0.508989	0.642446	0.764553	0.436653	0.924084	0.695562	0.578091	0.754009	0.61132	0.633027	0.617898	0.610263	0.656443	0.588772	0.573419	0.544875	0.547428	0.612106	0.702209	0.737676	0.783586	0.367437
GSM1523968	0.716619	0.643573	0.747902	0.855508	0.4639	0.874181	0.46544	0.373971	0.602259	0.54292	0.656588	0.648568	0.615763	0.603965	0.598751	0.663705	0.590364	0.524086	0.576615	0.691599	0.674233	0.541072	0.320228
GSM1523969	0.674516	0.565621	0.605029	0.815172	0.409925	0.87563	0.424428	0.429544	0.664073	0.568929	0.632358	0.627063	0.598908	0.635206	0.595584	0.606708	0.561629	0.50284	0.574888	0.680345	0.699194	0.491953	0.241669
GSM1523970	0.523545	0.493523	0.532375	0.740843	0.327839	0.690507	0.0674022	0.560179	0.744768	0.627658	0.627941	0.599081	0.60755	0.651539	0.556987	0.572261	0.533007	0.494892	0.581485	0.677469	0.70781	0.108251	0.235959
GSM1523971	0.748807	0.564974	0.704965	0.856515	0.519951	0.894101	0.465901	0.348035	0.557383	0.502161	0.649788	0.630075	0.622761	0.587471	0.594841	0.61953	0.597771	0.519155	0.600919	0.657138	0.666811	0.523476	0.34942
GSM1523972	0.600278	0.518494	0.637868	0.722506	0.286178	0.916392	0.360474	0.521942	0.653739	0.544249	0.599518	0.657777	0.654377	0.617126	0.525252	0.571261	0.535069	0.542892	0.582848	0.668511	0.711575	0.432358	0.330313
GSM1523973	0.472413	0.503229	0.611036	0.720533	0.448174	0.914407	0.365977	0.573343	0.774062	0.644295	0.619889	0.606223	0.603156	0.644164	0.54743	0.583277	0.541826	0.510543	0.594248	0.681851	0.724986	0.402569	0.3436
GSM1523974	0.561737	0.450887	0.585957	0.708089	0.292595	0.900974	0.394503	0.619342	0.781834	0.666047	0.620172	0.640394	0.587299	0.592193	0.555421	0.544102	0.520614	0.517479	0.591256	0.666425	0.687559	0.488166	0.203818
GSM1523975	0.679313	0.598721	0.651776	0.837425	0.644898	0.94241	0.889795	0.575491	0.71561	0.608536	0.645428	0.63826	0.612564	0.667521	0.579953	0.62666	0.586068	0.583104	0.622332	0.696174	0.749133	0.94161	0.504371
GSM1523976	0.46636	0.457845	0.536782	0.789766	0.351044	0.93528	0.510779	0.537377	0.746161	0.619006	0.642449	0.616716	0.61951	0.617552	0.556649	0.551598	0.554366	0.518127	0.59742	0.669639	0.694961	0.613884	0.277188
GSM1523977	0.510992	0.477596	0.546336	0.790903	0.366611	0.83195	0.263177	0.618598	0.777975	0.627071	0.609611	0.597958	0.598332	0.599246	0.568154	0.572057	0.520508	0.486072	0.54796	0.66092	0.738832	0.255292	0.243626
GSM1523978	0.60379	0.47541	0.698939	0.702673	0.309734	0.92439	0.566899	0.586632	0.720744	0.594238	0.647096	0.626713	0.65005	0.597528	0.560515	0.57143	0.536091	0.542359	0.616409	0.659626	0.70771	0.658022	0.347401
GSM1523979	0.601686	0.556978	0.582694	0.742806	0.363413	0.964479	0.781485	0.717142	0.867645	0.67983	0.619251	0.602416	0.589013	0.648953	0.556611	0.569617	0.503072	0.576398	0.66155	0.672791	0.739479	0.853471	0.39526
GSM1523980	0.702851	0.648915	0.601787	0.776436	0.422544	0.911672	0.688407	0.511089	0.704182	0.586236	0.650313	0.629397	0.598682	0.643589	0.586125	0.628471	0.585347	0.572482	0.645708	0.699061	0.72473	0.770706	0.37746
GSM1523981	0.825591	0.809994	0.651997	0.881674	0.854197	0.912609	0.6755	0.583249	0.734971	0.612415	0.65522	0.636244	0.612514	0.633925	0.616751	0.67803	0.598621	0.614594	0.709732	0.738997	0.715601	0.773417	0.487577
GSM1523982	0.818792	0.852813	0.681819	0.893292	0.759833	0.914614	0.593371	0.512571	0.67299	0.592975	0.670628	0.647821	0.633611	0.618047	0.606483	0.679238	0.612625	0.623669	0.694079	0.739284	0.704341	0.651727	0.494413
GSM1523983	0.737029	0.614027	0.699604	0.787488	0.294091	0.917753	0.627883	0.661283	0.815509	0.6522	0.622885	0.61999	0.599533	0.637547	0.593924	0.618177	0.548361	0.56233	0.656946	0.71652	0.7211	0.711969	0.320094
GSM1523984	0.634844	0.592577	0.618119	0.728717	0.475316	0.757996	0.432055	0.748911	0.84144	0.627372	0.609046	0.623651	0.623359	0.612396	0.579556	0.542255	0.541454	0.483281	0.531937	0.635088	0.67101	0.533584	0.306014
GSM1523985	0.755054	0.618541	0.734735	0.748023	0.632141	0.937542	0.709997	0.587354	0.75331	0.627502	0.643567	0.630894	0.642565	0.662413	0.567554	0.623222	0.568957	0.561213	0.648275	0.69575	0.733562	0.798131	0.413381
GSM1523986	0.738793	0.536575	0.679417	0.787635	0.581033	0.938908	0.806088	0.419162	0.643625	0.552848	0.628511	0.631174	0.606171	0.655733	0.594744	0.61958	0.5696	0.579551	0.629722	0.700108	0.719541	0.880398	0.415738
GSM1523987	0.600712	0.474247	0.635196	0.771759	0.508927	0.899889	0.596614	0.536197	0.718619	0.592038	0.647689	0.613766	0.595956	0.659074	0.559082	0.563914	0.573543	0.534985	0.601372	0.688086	0.713052	0.650437	0.363087
GSM1523988	0.561284	0.713351	0.440487	0.892328	0.443224	0.90871	0.717124	0.326783	0.5743	0.537135	0.646595	0.670993	0.641055	0.652771	0.594748	0.663407	0.630504	0.542869	0.587264	0.72056	0.712278	0.775986	0.342452
GSM1523989	0.763687	0.645406	0.718743	0.802569	0.681596	0.916243	0.640569	0.487764	0.694531	0.594489	0.637532	0.627022	0.633929	0.630776	0.582793	0.648389	0.570843	0.556257	0.620484	0.698228	0.714945	0.738637	0.361212
GSM1523990	0.857313	0.748792	0.465512	0.832866	0.512855	0.883027	0.345178	0.590617	0.750168	0.616565	0.630899	0.618445	0.603979	0.590225	0.564269	0.645892	0.541665	0.541468	0.603097	0.684221	0.678476	0.433668	0.361548
GSM1523991	0.645736	0.647784	0.622564	0.797136	0.428679	0.887632	0.595627	0.562691	0.755305	0.633053	0.633903	0.621215	0.562139	0.612213	0.573686	0.608073	0.538027	0.509984	0.593471	0.682249	0.687054	0.65127	0.256337
GSM1523992	0.545075	0.477978	0.5563	0.76047	0.328705	0.919354	0.430032	0.522465	0.745232	0.621042	0.611545	0.615093	0.581134	0.646554	0.55926	0.557307	0.539054	0.517047	0.557546	0.692164	0.71581	0.533036	0.254212
GSM1523993	0.620263	0.550227	0.620078	0.765737	0.417852	0.954513	0.800369	0.584096	0.749414	0.613397	0.618212	0.626445	0.580442	0.67549	0.58037	0.57904	0.542625	0.574858	0.668754	0.714561	0.766016	0.880972	0.400424
GSM1523994	0.59747	0.455379	0.568017	0.78336	0.407972	0.924774	0.623782	0.496215	0.69898	0.580627	0.619018	0.59987	0.61095	0.633363	0.585264	0.584923	0.542941	0.54748	0.594761	0.677219	0.686977	0.725922	0.331309
GSM1523995	0.571583	0.5698	0.538698	0.759311	0.254945	0.914049	0.465138	0.578967	0.756854	0.658809	0.629682	0.621209	0.600706	0.608878	0.577434	0.556718	0.553704	0.52181	0.595604	0.695925	0.688366	0.55528	0.252335
GSM1523996	0.70035	0.614193	0.665257	0.793014	0.676871	0.919714	0.52272	0.462362	0.688319	0.566824	0.646317	0.61576	0.603504	0.626271	0.574454	0.618947	0.581269	0.537179	0.627923	0.693557	0.690812	0.577133	0.26019
GSM1523997	0.622302	0.544466	0.563013	0.763035	0.344842	0.920349	0.501811	0.67576	0.832274	0.685752	0.642142	0.574378	0.607011	0.604889	0.591954	0.556038	0.541726	0.517428	0.611016	0.663472	0.710213	0.607365	0.281753
GSM1523998	0.508126	0.457443	0.553139	0.728895	0.370678	0.903361	0.282896	0.641941	0.798229	0.659576	0.635855	0.611777	0.611647	0.605268	0.564413	0.561594	0.527771	0.510434	0.564906	0.683098	0.69128	0.330983	0.263918
GSM1523999	0.492714	0.410218	0.502872	0.728112	0.373611	0.888595	0.150241	0.585876	0.734861	0.594884	0.63538	0.619672	0.61981	0.622915	0.544423	0.56596	0.553135	0.489875	0.559319	0.692857	0.722046	0.145915	0.233658
GSM1524000	0.712692	0.600736	0.629287	0.790866	0.493762	0.924884	0.631622	0.597177	0.79632	0.645121	0.633564	0.607471	0.583285	0.605307	0.565179	0.593067	0.550093	0.563837	0.632614	0.686857	0.697985	0.724457	0.370352
GSM1524001	0.56053	0.45211	0.619067	0.743225	0.34474	0.930157	0.566203	0.565087	0.767628	0.613664	0.628035	0.595418	0.608243	0.595686	0.562864	0.541271	0.525354	0.527216	0.610605	0.679452	0.726463	0.66309	0.34931
GSM1524002	0.582915	0.415978	0.581366	0.717176	0.305473	0.965542	0.893812	0.665535	0.811011	0.654285	0.614049	0.625654	0.59337	0.675991	0.534141	0.566438	0.542252	0.592185	0.652603	0.718358	0.764362	0.952045	0.550274
GSM1524003	0.479699	0.413802	0.495532	0.656645	0.292485	0.916151	0.282555	0.514232	0.740895	0.611681	0.600142	0.618727	0.617959	0.631976	0.531815	0.507047	0.508703	0.505759	0.551196	0.677139	0.702955	0.329712	0.275467
GSM1524004	0.604279	0.529109	0.630511	0.782247	0.542971	0.932997	0.651395	0.568156	0.741748	0.601646	0.641206	0.60175	0.609638	0.634957	0.563725	0.591589	0.559926	0.546933	0.60561	0.69565	0.722889	0.73942	0.337734
GSM1524005	0.559512	0.456833	0.578219	0.74886	0.347965	0.904599	0.57833	0.637377	0.819416	0.659101	0.644784	0.606892	0.589472	0.609866	0.539489	0.547594	0.536633	0.535142	0.603049	0.67976	0.700355	0.674346	0.297778
GSM1524006	0.671859	0.738937	0.738526	0.861617	0.66723	0.872401	0.5867	0.311215	0.59439	0.534751	0.639251	0.645918	0.606104	0.584312	0.633996	0.663685	0.597828	0.541387	0.592454	0.671126	0.658695	0.66192	0.352139
GSM1524007	0.514845	0.559895	0.635974	0.749326	0.363233	0.889368	0.616356	0.62954	0.806675	0.648492	0.639128	0.602733	0.587579	0.611309	0.5874	0.564707	0.526567	0.548626	0.626842	0.679511	0.7238	0.70853	0.323338
GSM1524008	0.516534	0.456313	0.575988	0.7466	0.200713	0.941481	0.523123	0.641406	0.785724	0.644801	0.652812	0.632888	0.617788	0.655832	0.546216	0.596995	0.586087	0.558802	0.61338	0.707065	0.742741	0.587395	0.358474
GSM1524009	0.779744	0.679405	0.683055	0.853749	0.554232	0.91492	0.463992	0.514378	0.685319	0.591453	0.63872	0.63401	0.612401	0.623118	0.589183	0.661412	0.585444	0.547159	0.631415	0.688678	0.696795	0.569574	0.330104
GSM1524010	0.779873	0.546015	0.739462	0.810891	0.461208	0.89248	0.575155	0.404251	0.6448	0.555608	0.632544	0.619063	0.574372	0.608178	0.586853	0.597602	0.56373	0.537315	0.593375	0.678093	0.686016	0.649698	0.316267
GSM1524011	0.427371	0.42244	0.522629	0.710463	0.380783	0.856634	0.296072	0.586303	0.762937	0.617775	0.615549	0.607689	0.597522	0.656421	0.538042	0.517054	0.534858	0.491815	0.567088	0.692988	0.70271	0.328343	0.253073
GSM1524012	0.551863	0.470431	0.527003	0.736923	0.319873	0.878355	0.628937	0.652612	0.795483	0.628049	0.617051	0.607013	0.598071	0.608139	0.554862	0.560115	0.519267	0.562833	0.651293	0.695469	0.705738	0.729583	0.402133
GSM1524013	0.709589	0.567717	0.684092	0.735044	0.447893	0.938379	0.56017	0.576594	0.776745	0.653034	0.634711	0.618793	0.599991	0.646662	0.537097	0.601201	0.552242	0.56536	0.658726	0.725152	0.737427	0.661905	0.324441
GSM1524014	0.546829	0.45496	0.57101	0.725296	0.404643	0.858216	0.3215	0.569475	0.750705	0.624008	0.623765	0.613099	0.637446	0.667545	0.530144	0.573868	0.546878	0.512118	0.538107	0.69984	0.723126	0.361484	0.32318
GSM1524015	0.475472	0.444862	0.526274	0.752177	0.331707	0.876864	0.338292	0.544956	0.765175	0.61125	0.619129	0.596113	0.643011	0.58692	0.578104	0.563835	0.511755	0.466533	0.536584	0.661534	0.703455	0.356221	0.247968
GSM1524016	0.606495	0.518728	0.577272	0.750006	0.419291	0.924231	0.648484	0.56208	0.732504	0.616231	0.632583	0.619561	0.60678	0.66483	0.560978	0.571965	0.565335	0.562575	0.620257	0.711693	0.732009	0.71301	0.422289
GSM1524017	0.59028	0.5076	0.573627	0.722256	0.423421	0.94472	0.662058	0.628439	0.795417	0.65276	0.624831	0.600713	0.599483	0.655076	0.543955	0.579277	0.540063	0.540564	0.605308	0.70255	0.723996	0.759777	0.361114
GSM1524018	0.522179	0.46392	0.540302	0.718211	0.461271	0.929661	0.550233	0.60949	0.783656	0.652846	0.621308	0.592668	0.595198	0.643612	0.528255	0.521501	0.510036	0.528137	0.580511	0.699332	0.738322	0.634676	0.347791
GSM1524019	0.627781	0.571846	0.635848	0.787532	0.515248	0.916322	0.591791	0.600902	0.791541	0.646249	0.662695	0.607533	0.622821	0.63448	0.575035	0.593715	0.557124	0.54645	0.626968	0.693464	0.73029	0.670198	0.320117
GSM1524020	0.607361	0.574094	0.606633	0.778578	0.470914	0.912177	0.557409	0.559848	0.731459	0.600298	0.622985	0.610119	0.606928	0.641169	0.576202	0.593832	0.562566	0.55315	0.603816	0.692012	0.704328	0.649885	0.3193
GSM1524021	0.681927	0.626104	0.69669	0.818825	0.575662	0.914273	0.590985	0.577238	0.735217	0.60944	0.637636	0.62727	0.596998	0.646177	0.594316	0.637774	0.564424	0.558232	0.642757	0.69972	0.729974	0.669713	0.38461
GSM1524022	0.749418	0.595981	0.710022	0.845486	0.511953	0.940199	0.579077	0.579556	0.74307	0.610935	0.643367	0.620453	0.628462	0.601807	0.610412	0.660044	0.579769	0.568629	0.613195	0.689031	0.703502	0.669857	0.392294
GSM1524023	0.524683	0.534755	0.567319	0.754894	0.323885	0.942062	0.631559	0.627954	0.809112	0.671318	0.64628	0.601477	0.606201	0.617316	0.570319	0.567613	0.543674	0.52119	0.611708	0.690734	0.734336	0.709331	0.338434
GSM1524024	0.660197	0.623728	0.620439	0.785297	0.539407	0.893646	0.424438	0.53204	0.714102	0.601489	0.632534	0.613622	0.589522	0.633101	0.587724	0.613724	0.564467	0.533073	0.615826	0.696143	0.708476	0.474306	0.281192
GSM1524025	0.736767	0.67482	0.641827	0.823871	0.261009	0.948401	0.660924	0.635652	0.776077	0.63156	0.639734	0.633924	0.623104	0.643822	0.581623	0.648456	0.583796	0.592802	0.678527	0.708378	0.73126	0.739919	0.442327
GSM1524026	0.564825	0.673181	0.729284	0.847595	0.73767	0.908543	0.584168	0.38483	0.643416	0.563427	0.641786	0.649486	0.648009	0.610643	0.614347	0.651617	0.605842	0.553225	0.63782	0.696755	0.687922	0.688857	0.353582
GSM1524027	0.584434	0.53973	0.658185	0.754971	0.549031	0.939289	0.44481	0.504973	0.69541	0.578571	0.632413	0.626602	0.635353	0.671673	0.554939	0.595523	0.562459	0.534108	0.625052	0.717908	0.740055	0.519545	0.308295
GSM1524028	0.553776	0.48946	0.525042	0.725736	0.438393	0.89235	0.547055	0.625564	0.778706	0.641587	0.626461	0.629213	0.628724	0.616271	0.57571	0.542291	0.529957	0.516114	0.597074	0.682684	0.721171	0.595962	0.295038
GSM1524029	0.712961	0.587799	0.712735	0.857316	0.518658	0.875992	0.497071	0.288803	0.503705	0.504851	0.642206	0.648182	0.653116	0.580423	0.599655	0.629331	0.617209	0.499124	0.566731	0.666956	0.659119	0.595951	0.309597
GSM1524030	0.764077	0.682948	0.694389	0.848211	0.623789	0.84267	0.511779	0.279446	0.555491	0.53091	0.653928	0.654243	0.597308	0.599106	0.622814	0.639641	0.600125	0.506574	0.566449	0.695878	0.671437	0.545077	0.291437
GSM1524031	0.614254	0.584909	0.572387	0.698972	0.458633	0.91656	0.501064	0.602064	0.791114	0.648107	0.628746	0.616244	0.646273	0.676738	0.544415	0.616323	0.558465	0.529125	0.62506	0.7136	0.743293	0.574622	0.385703
GSM1524032	0.78301	0.681169	0.710987	0.850426	0.424686	0.909623	0.350798	0.669429	0.814602	0.648728	0.647888	0.60807	0.615713	0.595784	0.580158	0.650181	0.52012	0.557058	0.659892	0.694511	0.687821	0.40993	0.346167
GSM1524033	0.639185	0.518368	0.654977	0.730383	0.54381	0.967945	0.819859	0.58656	0.728684	0.614252	0.628174	0.635879	0.664096	0.651673	0.55623	0.62134	0.574225	0.560532	0.61167	0.684417	0.725858	0.884385	0.499911
GSM1524034	0.666312	0.464437	0.646056	0.789473	0.535851	0.90508	0.596603	0.442853	0.628027	0.546262	0.633744	0.611179	0.581351	0.634621	0.586201	0.579395	0.560121	0.544232	0.601671	0.668167	0.690079	0.666992	0.333491
GSM1524035	0.775841	0.645765	0.792203	0.840261	0.525202	0.924351	0.665098	0.442	0.656706	0.565758	0.653117	0.637834	0.634812	0.617208	0.600553	0.649026	0.577622	0.554107	0.620412	0.689931	0.701029	0.751533	0.37349
GSM1524036	0.677063	0.61639	0.648079	0.7685	0.574667	0.886242	0.428116	0.614808	0.778435	0.647727	0.653313	0.586213	0.619222	0.629503	0.559105	0.611244	0.589785	0.517896	0.589323	0.703485	0.718901	0.492926	0.310797
GSM1524037	0.617019	0.660848	0.593316	0.823112	0.475857	0.909136	0.382803	0.500431	0.674875	0.591496	0.643944	0.633323	0.643596	0.625563	0.585681	0.644814	0.574734	0.542091	0.590349	0.673542	0.708558	0.473978	0.348118
GSM1524038	0.794163	0.603707	0.697534	0.812688	0.537592	0.924879	0.710606	0.605244	0.738814	0.609763	0.650212	0.625033	0.628387	0.662544	0.562505	0.640406	0.570868	0.614279	0.702756	0.734107	0.725042	0.787633	0.52594
GSM1524039	0.897655	0.836187	0.718994	0.868508	0.815189	0.909716	0.469694	0.558012	0.698419	0.591281	0.662338	0.633912	0.621658	0.60766	0.620361	0.691447	0.591466	0.596395	0.708654	0.733032	0.689801	0.528212	0.453584
GSM1524040	0.625474	0.51899	0.63836	0.716112	0.328893	0.912086	0.67147	0.607096	0.784578	0.641589	0.618287	0.602042	0.563096	0.6404	0.543751	0.541611	0.529718	0.571807	0.650961	0.699962	0.730212	0.764319	0.41062
GSM1524041	0.782604	0.664898	0.703905	0.798822	0.408603	0.94293	0.594948	0.669436	0.82801	0.660108	0.65773	0.604892	0.596963	0.631831	0.567048	0.632192	0.531742	0.580344	0.680517	0.693604	0.726892	0.665722	0.433224
GSM1524042	0.731401	0.645958	0.68613	0.78912	0.464289	0.916461	0.705663	0.571931	0.734341	0.600509	0.663797	0.61898	0.62013	0.607452	0.612427	0.618243	0.55913	0.585088	0.666351	0.678371	0.706658	0.784566	0.427742
GSM1524043	0.664735	0.51209	0.639429	0.719786	0.418612	0.966689	0.884401	0.627039	0.78443	0.647254	0.624379	0.630031	0.613542	0.671726	0.55701	0.604577	0.548676	0.59697	0.660638	0.669853	0.752784	0.935124	0.541268
GSM1524044	0.629522	0.615113	0.63888	0.812408	0.604175	0.915257	0.591633	0.523588	0.711139	0.606542	0.628804	0.63212	0.611073	0.618026	0.582711	0.614651	0.555648	0.5259	0.628297	0.685135	0.711237	0.694925	0.327757
GSM1524045	0.553306	0.501417	0.591844	0.695186	0.445192	0.880509	0.375574	0.521973	0.646306	0.564107	0.612363	0.598748	0.599917	0.636763	0.572778	0.566459	0.543307	0.52198	0.585802	0.684346	0.696819	0.467354	0.229855
GSM1524046	0.740905	0.632613	0.683187	0.806752	0.577112	0.91261	0.549126	0.546739	0.739376	0.621891	0.624725	0.634068	0.616841	0.636821	0.582237	0.633836	0.567944	0.53016	0.608763	0.684534	0.707567	0.652909	0.359459
GSM1524047	0.476723	0.516086	0.601076	0.767326	0.378837	0.912436	0.41439	0.442233	0.62011	0.556355	0.626864	0.646169	0.637647	0.670061	0.563013	0.573192	0.56931	0.527181	0.597389	0.697927	0.719265	0.4912	0.358186
GSM1524048	0.793054	0.711372	0.674869	0.821174	0.40534	0.867014	0.672304	0.617991	0.799278	0.641443	0.635477	0.611696	0.620421	0.64145	0.581877	0.630816	0.549392	0.563596	0.601688	0.694011	0.713922	0.770594	0.405435
GSM1524049	0.806627	0.707269	0.695146	0.799844	0.365907	0.944116	0.619595	0.602421	0.761459	0.64252	0.630252	0.627414	0.614039	0.619293	0.59471	0.67109	0.56565	0.556064	0.608533	0.699644	0.718787	0.714665	0.436172
GSM1524050	0.62682	0.500211	0.691031	0.75591	0.341871	0.914192	0.350978	0.505654	0.671154	0.592097	0.612534	0.599647	0.601319	0.651525	0.537674	0.55297	0.538814	0.491777	0.552671	0.678668	0.689724	0.392303	0.238989
GSM1524051	0.727655	0.589425	0.621645	0.752833	0.372784	0.958245	0.757165	0.51637	0.713275	0.594634	0.624922	0.60834	0.606565	0.642071	0.57403	0.581699	0.538755	0.580727	0.633969	0.694732	0.722867	0.827122	0.413408
GSM1524052	0.389253	0.535321	0.562415	0.828123	0.550867	0.816584	0.318784	0.435691	0.697714	0.58791	0.634568	0.617408	0.58536	0.620094	0.579554	0.617331	0.545126	0.490858	0.553371	0.649767	0.658479	0.338603	0.224579
GSM1524053	0.634922	0.539371	0.620818	0.749286	0.4588	0.953676	0.521911	0.572048	0.741843	0.619259	0.626774	0.624586	0.652437	0.612234	0.564471	0.596655	0.5603	0.562211	0.620026	0.67457	0.697384	0.61137	0.41401
GSM1524054	0.614982	0.561654	0.585313	0.726279	0.496246	0.928393	0.575226	0.722757	0.832073	0.665119	0.614905	0.616484	0.584682	0.600938	0.554597	0.560319	0.494105	0.538088	0.615631	0.671561	0.701557	0.651524	0.375325
GSM1524055	0.75773	0.704937	0.771972	0.811862	0.539829	0.908026	0.432824	0.544586	0.715146	0.623566	0.658906	0.637943	0.657705	0.644536	0.608736	0.667312	0.583601	0.547216	0.656521	0.699845	0.71266	0.500949	0.27616
GSM1524056	0.586289	0.443502	0.646927	0.745563	0.509428	0.933394	0.540105	0.517929	0.697046	0.599735	0.626549	0.616183	0.645662	0.645127	0.550187	0.593086	0.544387	0.568073	0.659167	0.718981	0.723806	0.627579	0.389061
GSM1524057	0.613319	0.65754	0.559233	0.880767	0.7014	0.86316	0.51358	0.402677	0.612429	0.545806	0.658343	0.6527	0.615043	0.608879	0.607056	0.660276	0.609223	0.510402	0.578176	0.692956	0.678373	0.610351	0.270234
GSM1524058	0.717237	0.705717	0.703697	0.879445	0.776331	0.974258	0.86037	0.48565	0.634326	0.584966	0.673954	0.672572	0.679054	0.663515	0.588914	0.688776	0.635596	0.616693	0.703758	0.707444	0.721066	0.893937	0.519502
GSM1524059	0.643778	0.746682	0.690223	0.871305	0.667659	0.882817	0.553101	0.572167	0.728351	0.608026	0.647357	0.649524	0.605962	0.62438	0.599373	0.641259	0.575107	0.583772	0.695301	0.708198	0.690961	0.594235	0.434998
GSM1524060	0.625438	0.518813	0.556934	0.819766	0.28812	0.872972	0.410394	0.604459	0.751905	0.646899	0.638329	0.626425	0.62601	0.626494	0.542556	0.608653	0.536784	0.544355	0.63629	0.65228	0.705102	0.465454	0.324406
GSM1524061	0.495145	0.460717	0.545551	0.697514	0.263488	0.929115	0.472714	0.668497	0.840301	0.683846	0.623977	0.600946	0.617489	0.627455	0.552872	0.557301	0.504633	0.520965	0.574323	0.690279	0.699949	0.546731	0.294679
GSM1524062	0.811157	0.660634	0.764785	0.850272	0.650633	0.824585	0.49794	0.317351	0.588429	0.544943	0.650541	0.645924	0.605854	0.619579	0.607812	0.636011	0.596904	0.504052	0.566246	0.689105	0.677005	0.515678	0.293565
GSM1524068	0.52699	0.510158	0.618259	0.748	0.275973	0.944733	0.613931	0.617318	0.789027	0.657193	0.632251	0.625608	0.652274	0.667066	0.557064	0.576697	0.545074	0.523835	0.561769	0.690093	0.730374	0.712949	0.384637
GSM1524069	0.455661	0.404316	0.508042	0.677895	0.290425	0.920237	0.525846	0.619921	0.80085	0.636538	0.588371	0.615772	0.572437	0.65154	0.544816	0.503588	0.501003	0.521104	0.568728	0.683191	0.69088	0.577844	0.262105
GSM1524070	0.509998	0.428943	0.59476	0.750053	0.387697	0.8957	0.386709	0.480431	0.652159	0.559159	0.594734	0.624732	0.614167	0.638752	0.555444	0.567414	0.523218	0.502997	0.540913	0.67535	0.6886	0.45062	0.223354
GSM1524071	0.568517	0.508223	0.588704	0.78048	0.365723	0.908625	0.487625	0.502531	0.690598	0.572178	0.608802	0.601137	0.619203	0.600151	0.575912	0.595136	0.543145	0.504475	0.582488	0.645128	0.65158	0.531759	0.261693
GSM1524072	0.521932	0.493093	0.625376	0.790863	0.469515	0.912105	0.488262	0.5331	0.692755	0.583663	0.62752	0.602535	0.621902	0.628062	0.578521	0.583515	0.557209	0.516529	0.590261	0.662048	0.678469	0.525739	0.339441
GSM2235556	0.48921	0.569106	0.455972	0.777209	0.308114	0.877328	0.290907	0.515115	0.718877	0.573571	0.621469	0.626796	0.642292	0.611074	0.536176	0.553799	0.533996	0.515208	0.601909	0.695271	0.682657	0.329439	0.29363
GSM2235557	0.631453	0.610009	0.536505	0.785485	0.721578	0.893855	0.347522	0.39195	0.616224	0.548856	0.636649	0.615283	0.665291	0.650069	0.583957	0.627996	0.582571	0.539356	0.569949	0.710227	0.682481	0.400211	0.309361
GSM2235558	0.601499	0.623907	0.537979	0.842194	0.543982	0.905064	0.481648	0.4068	0.609197	0.520751	0.639149	0.615758	0.638613	0.637958	0.568955	0.607974	0.566236	0.541639	0.561287	0.693327	0.690616	0.585365	0.3636
GSM2235559	0.525716	0.548194	0.529738	0.846338	0.598871	0.888464	0.403895	0.421252	0.632855	0.543818	0.648713	0.615037	0.651554	0.651664	0.549783	0.618409	0.566722	0.549359	0.610678	0.681237	0.675405	0.473368	0.340436
GSM2235560	0.510716	0.65373	0.690848	0.868899	0.577904	0.90324	0.542345	0.452726	0.645372	0.564125	0.659372	0.621866	0.641104	0.646397	0.587622	0.642961	0.587266	0.556484	0.584309	0.714932	0.687631	0.644659	0.396247
GSM2235561	0.745617	0.579282	0.627991	0.816132	0.649571	0.886628	0.444923	0.529773	0.728052	0.611205	0.633793	0.619591	0.618941	0.628054	0.577171	0.598207	0.561379	0.545038	0.59539	0.68572	0.687208	0.488777	0.327767
GSM2235562	0.58781	0.586046	0.524419	0.753423	0.369431	0.894836	0.378688	0.652351	0.789699	0.641944	0.624071	0.609122	0.636491	0.634957	0.575255	0.575278	0.525549	0.515616	0.56411	0.686744	0.70698	0.429137	0.284109
GSM2235563	0.649232	0.515759	0.583112	0.80902	0.500787	0.933345	0.534623	0.615383	0.798144	0.637575	0.644797	0.59581	0.617387	0.63931	0.564533	0.589649	0.548634	0.536025	0.581643	0.698356	0.728825	0.624835	0.397718
GSM2235564	0.535996	0.457372	0.559154	0.692577	0.218853	0.861796	0.342067	0.618212	0.812114	0.602845	0.595209	0.59368	0.616002	0.590087	0.514122	0.538676	0.468972	0.51639	0.601331	0.6386	0.701278	0.36237	0.1969
GSM2235565	0.651637	0.635768	0.663368	0.866656	0.612992	0.864462	0.415238	0.426428	0.619581	0.540376	0.648653	0.611619	0.619991	0.643768	0.569516	0.635223	0.60266	0.515884	0.558024	0.719382	0.695108	0.497005	0.291729
GSM2235566	0.503817	0.613117	0.437844	0.815159	0.440109	0.884534	0.430895	0.538631	0.730154	0.569073	0.625079	0.625508	0.666603	0.621384	0.554193	0.590199	0.566986	0.52626	0.555571	0.700496	0.691135	0.514939	0.333951
GSM2235567	0.330447	0.630069	0.495481	0.855069	0.589613	0.850722	0.449635	0.453283	0.681797	0.563274	0.637966	0.62762	0.621619	0.631383	0.571756	0.640107	0.587045	0.51897	0.595437	0.698954	0.6787	0.490049	0.317771
GSM2235568	0.530264	0.51358	0.542918	0.779519	0.488486	0.863191	0.249622	0.500572	0.736867	0.57677	0.604442	0.633335	0.630574	0.633744	0.539106	0.573533	0.532103	0.508765	0.571193	0.698335	0.705141	0.264155	0.192889
GSM2235569	0.648851	0.575827	0.566632	0.750796	0.316889	0.893268	0.325811	0.65107	0.820156	0.656878	0.639779	0.622898	0.616497	0.64775	0.526765	0.593685	0.5242	0.521624	0.58738	0.696786	0.73367	0.35492	0.312011
GSM2235570	0.752764	0.632313	0.675448	0.838816	0.587208	0.890905	0.357318	0.514494	0.715589	0.58995	0.637266	0.639605	0.652123	0.641472	0.573771	0.660097	0.577087	0.548413	0.611602	0.717834	0.711214	0.375325	0.346817
GSM2235571	0.630964	0.60589	0.54272	0.80106	0.389478	0.886073	0.498666	0.568522	0.747308	0.606513	0.610996	0.627375	0.597305	0.636614	0.530196	0.605916	0.52348	0.550517	0.644046	0.693126	0.704755	0.528752	0.346433
GSM2235572	0.640662	0.59735	0.610804	0.838334	0.577857	0.882756	0.727384	0.401362	0.650999	0.541337	0.644422	0.627079	0.633207	0.63677	0.586038	0.645218	0.576164	0.564082	0.599982	0.709991	0.709115	0.812452	0.465359
GSM2235573	0.675373	0.622414	0.633399	0.839524	0.530901	0.975084	0.659002	0.466563	0.683555	0.582299	0.644317	0.603865	0.641876	0.66884	0.583611	0.628666	0.561894	0.563477	0.601359	0.728495	0.717875	0.76885	0.490568
GSM2235574	0.852528	0.772243	0.750421	0.889951	0.598817	0.922187	0.466074	0.568006	0.749669	0.643377	0.668209	0.616843	0.643401	0.628464	0.586017	0.637274	0.570094	0.56565	0.653334	0.698563	0.691606	0.562887	0.300946
GSM2235575	0.529241	0.392273	0.497057	0.627652	0.439305	0.878399	0.35087	0.670789	0.785008	0.623901	0.617925	0.602655	0.625523	0.619998	0.557793	0.520772	0.486571	0.531497	0.599204	0.650921	0.6985	0.387454	0.33313
GSM2235576	0.523995	0.500927	0.537189	0.70694	0.452753	0.97291	0.741893	0.654866	0.789622	0.662	0.623099	0.58576	0.633496	0.673551	0.572798	0.573246	0.518808	0.590759	0.613548	0.679725	0.742053	0.844361	0.53297
GSM2235577	0.887115	0.727364	0.753215	0.86037	0.698516	0.916303	0.575445	0.547519	0.70247	0.606556	0.665046	0.598254	0.638546	0.624978	0.601836	0.652455	0.584554	0.55812	0.635895	0.692808	0.679251	0.680468	0.387005
GSM2235578	0.652277	0.616908	0.607889	0.74878	0.470989	0.950728	0.726508	0.634554	0.778386	0.640308	0.6301	0.583896	0.625816	0.643177	0.572813	0.548367	0.505796	0.570907	0.628226	0.675259	0.715712	0.828346	0.482072
GSM2235579	0.882941	0.685306	0.708408	0.845664	0.410197	0.9543	0.67086	0.600165	0.758723	0.659636	0.672421	0.576969	0.633701	0.68492	0.579758	0.680662	0.57523	0.573458	0.614925	0.706188	0.732511	0.774194	0.546641
GSM2235580	0.778045	0.688952	0.655982	0.818626	0.6951	0.925473	0.604444	0.513845	0.693238	0.61862	0.644013	0.613761	0.614415	0.646138	0.596848	0.595815	0.578916	0.573466	0.619569	0.711986	0.692031	0.694607	0.448129
GSM2235582	0.604312	0.538872	0.551562	0.807628	0.447338	0.945791	0.486084	0.499586	0.683531	0.583171	0.61987	0.614403	0.640144	0.610285	0.571506	0.595714	0.528899	0.548787	0.608721	0.656928	0.676887	0.515583	0.343568
GSM2235584	0.54615	0.582405	0.541033	0.799639	0.587772	0.914682	0.418478	0.54105	0.699123	0.60362	0.620553	0.603747	0.609631	0.657631	0.585561	0.589817	0.532547	0.554882	0.649485	0.682915	0.696352	0.459537	0.265521
GSM2235585	0.710721	0.530009	0.64669	0.755655	0.470488	0.954234	0.735698	0.509089	0.720662	0.611587	0.633701	0.613769	0.635848	0.703335	0.583025	0.590767	0.538948	0.615411	0.658982	0.728633	0.750837	0.841663	0.528735
GSM2235586	0.787639	0.640536	0.704185	0.794922	0.649771	0.954973	0.860825	0.534272	0.726021	0.622141	0.647542	0.612971	0.609558	0.713929	0.588893	0.559063	0.545352	0.621982	0.661244	0.703093	0.759091	0.956284	0.663076
GSM2235587	0.601542	0.592398	0.56597	0.801946	0.528813	0.933467	0.483079	0.552819	0.747165	0.631279	0.620657	0.600961	0.642533	0.641058	0.564954	0.604275	0.535832	0.559974	0.622142	0.702275	0.696916	0.593022	0.37242
GSM2235588	0.628503	0.706978	0.572678	0.844502	0.631899	0.880453	0.351763	0.464233	0.656817	0.585613	0.650521	0.591989	0.624502	0.639816	0.59419	0.624041	0.574681	0.539249	0.559369	0.703778	0.691767	0.405792	0.293729
GSM2235589	0.741806	0.604164	0.656953	0.782209	0.475723	0.879655	0.467689	0.64564	0.801263	0.641486	0.632331	0.633766	0.618554	0.653154	0.583746	0.623478	0.519091	0.553577	0.616911	0.706553	0.713343	0.552677	0.352302
GSM2235593	0.583828	0.528989	0.577209	0.743825	0.450217	0.964045	0.621674	0.677767	0.81012	0.667616	0.635585	0.590438	0.607755	0.655424	0.565681	0.594964	0.525152	0.571659	0.645009	0.694992	0.722583	0.716215	0.435901
GSM2235595	0.623827	0.553236	0.626588	0.803422	0.558595	0.906917	0.595577	0.477898	0.670097	0.559071	0.647347	0.635363	0.621147	0.632011	0.579356	0.595683	0.562726	0.569779	0.609546	0.690134	0.697266	0.679145	0.429124
GSM2235596	0.557542	0.544706	0.563083	0.745226	0.605933	0.914617	0.508107	0.506002	0.760406	0.611203	0.613968	0.602555	0.634807	0.61744	0.603898	0.56128	0.517519	0.53906	0.588697	0.682832	0.716978	0.59955	0.331133
GSM2235597	0.543856	0.446302	0.533569	0.665375	0.391975	0.896081	0.427947	0.614566	0.816914	0.634398	0.623736	0.629265	0.627657	0.644497	0.533581	0.522972	0.481064	0.524151	0.587791	0.679905	0.723917	0.517364	0.310565
GSM2235598	0.662536	0.551204	0.600524	0.812124	0.65741	0.924116	0.593751	0.436374	0.659368	0.562993	0.651886	0.630932	0.630738	0.636918	0.578397	0.604057	0.577196	0.59366	0.650974	0.703584	0.714127	0.688147	0.486903
GSM2235599	0.53569	0.536601	0.529852	0.781654	0.483609	0.937695	0.639951	0.57724	0.743558	0.623012	0.625598	0.626318	0.623595	0.660869	0.569033	0.580698	0.54303	0.55743	0.59786	0.719084	0.734149	0.733428	0.38734
GSM2235600	0.80161	0.726449	0.734934	0.799175	0.628593	0.890118	0.499359	0.5798	0.765884	0.624809	0.649176	0.617315	0.613511	0.627065	0.582211	0.651695	0.554584	0.569391	0.659571	0.701713	0.711069	0.562257	0.408672
GSM2235601	0.738016	0.673021	0.655487	0.805077	0.745084	0.871186	0.468189	0.463586	0.686243	0.587566	0.627286	0.62262	0.625934	0.612998	0.598525	0.625775	0.568816	0.551967	0.637894	0.685578	0.672972	0.539739	0.35287
GSM2235602	0.670206	0.642738	0.64072	0.835338	0.626186	0.921808	0.611136	0.424689	0.653294	0.553075	0.646892	0.641936	0.647927	0.631686	0.583677	0.617365	0.571753	0.568951	0.610101	0.692795	0.682586	0.718316	0.448463
GSM2235603	0.634779	0.60441	0.59237	0.794241	0.471774	0.894429	0.47285	0.592609	0.781934	0.609841	0.62659	0.60119	0.625331	0.60549	0.560836	0.625886	0.523916	0.51748	0.552811	0.688157	0.714431	0.585343	0.391852
GSM2235604	0.687467	0.615704	0.643438	0.739136	0.464842	0.93264	0.636953	0.574049	0.782878	0.62515	0.628783	0.62883	0.608009	0.681923	0.546312	0.583881	0.540454	0.553174	0.616808	0.707581	0.764082	0.74223	0.440892
GSM2235605	0.673681	0.569271	0.598029	0.779036	0.590527	0.919265	0.528399	0.504327	0.700575	0.588454	0.636617	0.628294	0.626521	0.629794	0.570006	0.610321	0.559415	0.546874	0.601439	0.689115	0.695595	0.600835	0.344632
GSM2235606	0.708298	0.657285	0.567556	0.805986	0.684167	0.886253	0.590179	0.473589	0.688338	0.573492	0.633086	0.639137	0.635204	0.621261	0.580254	0.620434	0.566267	0.561949	0.625491	0.68338	0.686701	0.67253	0.426575
GSM2235607	0.783157	0.679513	0.653329	0.85308	0.66616	0.950242	0.518098	0.604847	0.727841	0.616056	0.648502	0.630483	0.61555	0.631392	0.593462	0.671125	0.569409	0.578317	0.679058	0.716903	0.716354	0.600033	0.366256
GSM2235608	0.595702	0.441812	0.606563	0.688636	0.431702	0.920071	0.483018	0.699369	0.840922	0.68845	0.636939	0.610685	0.593878	0.620447	0.546263	0.519168	0.503469	0.535204	0.62339	0.688327	0.726791	0.530013	0.30681
GSM2235609	0.717141	0.68142	0.600789	0.810121	0.659048	0.947091	0.765213	0.548425	0.719718	0.607199	0.641079	0.627801	0.626531	0.660877	0.590707	0.619035	0.567868	0.58933	0.653414	0.709249	0.732597	0.86299	0.472801
GSM2235610	0.812556	0.708061	0.703625	0.849829	0.636369	0.901334	0.564121	0.503254	0.659407	0.575303	0.639708	0.625146	0.608224	0.606811	0.58873	0.647872	0.562701	0.547136	0.584349	0.693186	0.688967	0.644344	0.366634
GSM2235611	0.612035	0.492247	0.533129	0.748632	0.546843	0.900649	0.49327	0.517229	0.712778	0.603639	0.619621	0.601292	0.589429	0.640848	0.564361	0.54781	0.528095	0.53821	0.625514	0.69145	0.693344	0.568119	0.304824
GSM2235612	0.65777	0.684086	0.57755	0.849103	0.563002	0.893991	0.527522	0.39403	0.637945	0.562448	0.639926	0.617455	0.62237	0.636973	0.605581	0.650877	0.596707	0.548722	0.59907	0.704253	0.710532	0.615827	0.319127
GSM2235613	0.562969	0.514531	0.54747	0.740326	0.349994	0.868842	0.445171	0.691649	0.863323	0.696188	0.607701	0.63067	0.604037	0.629355	0.560169	0.527617	0.495455	0.509546	0.618782	0.669496	0.717916	0.459702	0.255198
GSM2235614	0.706052	0.559746	0.708884	0.735478	0.530241	0.958036	0.808183	0.631913	0.795658	0.661628	0.635023	0.61947	0.633663	0.687691	0.576536	0.606565	0.547706	0.597674	0.658393	0.709155	0.773164	0.901776	0.53799
GSM2235615	0.752368	0.662101	0.682198	0.810111	0.603627	0.911082	0.44984	0.526344	0.736104	0.614419	0.632646	0.630418	0.633007	0.640273	0.563432	0.624056	0.554904	0.538053	0.615546	0.706682	0.716613	0.517427	0.246711
GSM2235616	0.662383	0.571132	0.580206	0.765196	0.418301	0.964775	0.680222	0.583187	0.730441	0.621066	0.622182	0.629476	0.62486	0.633258	0.572048	0.615506	0.544225	0.560423	0.624319	0.701277	0.728081	0.785571	0.423483
GSM2235617	0.626302	0.559783	0.657543	0.721773	0.430259	0.901043	0.568643	0.669352	0.82722	0.674445	0.649489	0.627851	0.599266	0.651163	0.559235	0.567848	0.533273	0.561848	0.608499	0.690021	0.741872	0.65706	0.375164
GSM2235618	0.590972	0.503492	0.577438	0.730047	0.539744	0.920351	0.518997	0.608865	0.757981	0.624653	0.620713	0.624655	0.620857	0.654058	0.546393	0.571464	0.524043	0.539735	0.600121	0.695006	0.712763	0.601677	0.303014
GSM2235619	0.572906	0.508303	0.569707	0.776931	0.478497	0.880231	0.394889	0.569107	0.766462	0.617391	0.62992	0.616073	0.614188	0.615245	0.571315	0.578296	0.530659	0.53109	0.585866	0.683783	0.70798	0.45512	0.302029
GSM2235620	0.673735	0.568257	0.680303	0.7484	0.436655	0.892782	0.535405	0.608651	0.742313	0.628051	0.612268	0.615028	0.613294	0.662791	0.561281	0.574813	0.538752	0.550728	0.605098	0.702338	0.708921	0.629547	0.36709
GSM2235621	0.563493	0.497894	0.577421	0.727763	0.480643	0.913319	0.401248	0.561452	0.798099	0.64095	0.636418	0.649799	0.633702	0.625118	0.584146	0.560144	0.542882	0.513564	0.620543	0.697306	0.703607	0.443739	0.303614
GSM2235622	0.77443	0.632192	0.690659	0.81074	0.672018	0.91769	0.554323	0.459279	0.684865	0.586016	0.661601	0.646939	0.639869	0.624934	0.590369	0.612749	0.562209	0.560243	0.606607	0.705502	0.706902	0.642043	0.37326
GSM2235623	0.569348	0.459495	0.547334	0.723024	0.360573	0.927563	0.649783	0.665048	0.809802	0.685109	0.626508	0.604281	0.613262	0.670077	0.557741	0.543404	0.533958	0.578586	0.668261	0.717447	0.76915	0.740489	0.457528
GSM2235624	0.689594	0.564001	0.618782	0.736694	0.415369	0.921867	0.551971	0.723694	0.830034	0.681521	0.63532	0.608964	0.604791	0.650144	0.571126	0.553796	0.522495	0.55636	0.65147	0.696855	0.750016	0.647724	0.340659
GSM2235625	0.77983	0.642798	0.730258	0.776924	0.645639	0.89628	0.625666	0.496299	0.682017	0.603934	0.635291	0.614569	0.592857	0.641532	0.60241	0.590732	0.56344	0.557968	0.643602	0.69881	0.717996	0.724284	0.354914
GSM2235626	0.885107	0.730916	0.570002	0.808389	0.724554	0.898816	0.526158	0.548832	0.712734	0.623015	0.658429	0.649326	0.637461	0.635963	0.604315	0.646185	0.580629	0.578683	0.65942	0.712793	0.718144	0.5669	0.471098
GSM2235627	0.720744	0.613082	0.66745	0.744307	0.513108	0.95339	0.554271	0.602638	0.771883	0.657652	0.639723	0.623128	0.622914	0.663117	0.576528	0.574345	0.547227	0.572334	0.658333	0.737897	0.75449	0.665493	0.37674
GSM2235628	0.894276	0.751122	0.756288	0.836079	0.662251	0.877949	0.370572	0.526115	0.719068	0.625798	0.6583	0.624645	0.619391	0.624828	0.626726	0.674991	0.567692	0.56156	0.637739	0.707538	0.698287	0.38951	0.381933
GSM2235629	0.74541	0.711546	0.724124	0.803186	0.66038	0.880299	0.623495	0.550394	0.727779	0.627611	0.655205	0.614461	0.617159	0.609286	0.603866	0.613827	0.554743	0.58553	0.673534	0.693858	0.700707	0.730022	0.437422
GSM2235630	0.774206	0.703803	0.729082	0.780434	0.641206	0.906719	0.509652	0.454829	0.652725	0.577983	0.632246	0.652246	0.604293	0.604411	0.602376	0.622233	0.569733	0.558991	0.637488	0.701074	0.696868	0.546277	0.337339
GSM2235631	0.789772	0.661419	0.67508	0.798347	0.588328	0.935007	0.724501	0.523062	0.716284	0.612545	0.645988	0.62625	0.613992	0.632227	0.595854	0.612313	0.55712	0.577417	0.621038	0.70959	0.714745	0.819183	0.435359
GSM2235632	0.738993	0.595798	0.668723	0.741849	0.506515	0.936281	0.657562	0.661091	0.788058	0.665856	0.629458	0.610787	0.583988	0.628237	0.57261	0.561316	0.544424	0.577837	0.632906	0.704319	0.724399	0.761348	0.522385
GSM2235633	0.753105	0.721984	0.657035	0.829947	0.657862	0.896331	0.614657	0.543303	0.697872	0.6038	0.643708	0.630679	0.613124	0.627922	0.606788	0.624468	0.578215	0.573762	0.619617	0.717193	0.727138	0.718273	0.412159
GSM2235634	0.760786	0.586	0.700614	0.747196	0.607719	0.922436	0.433738	0.561431	0.763547	0.646367	0.638714	0.61803	0.623329	0.674406	0.575746	0.610376	0.555971	0.56236	0.652065	0.717674	0.73979	0.535762	0.326454
GSM2235635	0.621243	0.50628	0.672714	0.735628	0.444409	0.868729	0.695576	0.625627	0.805743	0.641731	0.615819	0.617355	0.616112	0.647752	0.540006	0.576207	0.51932	0.545713	0.61187	0.69595	0.739518	0.800937	0.465138
GSM2235636	0.783729	0.669637	0.681386	0.805224	0.626998	0.916059	0.59564	0.455315	0.655302	0.58667	0.635361	0.637234	0.617659	0.617467	0.594032	0.592651	0.57142	0.561993	0.621973	0.694977	0.712543	0.664468	0.406518
GSM2235637	0.541551	0.433641	0.520142	0.71203	0.490902	0.953255	0.677107	0.569639	0.753879	0.619203	0.598803	0.620475	0.606215	0.641044	0.544274	0.530335	0.531338	0.575025	0.651503	0.669534	0.700013	0.753409	0.423677
GSM2235695	0.467269	0.354536	0.45911	0.604375	0.164118	0.931632	0.559707	0.560081	0.776849	0.611831	0.627828	0.577247	0.556037	0.678296	0.514354	0.52264	0.524397	0.51895	0.591653	0.688145	0.711713	0.586148	0.337899
GSM2235696	0.627043	0.496913	0.657266	0.713079	0.307934	0.949741	0.793802	0.711651	0.866649	0.684644	0.611888	0.626143	0.57924	0.678423	0.542298	0.547005	0.518804	0.575551	0.64822	0.705406	0.771627	0.88216	0.49432
GSM2235697	0.515763	0.441314	0.507979	0.726147	0.214706	0.87201	0.310385	0.649467	0.824257	0.631074	0.577675	0.603057	0.585714	0.587378	0.565475	0.547959	0.447661	0.486314	0.569446	0.647804	0.686384	0.304379	0.277848
GSM2235698	0.651779	0.455706	0.704441	0.67292	0.482933	0.887422	0.569685	0.600498	0.769102	0.620365	0.619048	0.631585	0.61048	0.620699	0.550845	0.507754	0.516582	0.533786	0.604504	0.687165	0.718946	0.673885	0.313789
GSM2235699	0.785977	0.665056	0.685818	0.786247	0.378844	0.902506	0.51277	0.603518	0.786318	0.634769	0.63378	0.628482	0.594816	0.608389	0.590057	0.626308	0.528497	0.532212	0.619844	0.692505	0.719098	0.583932	0.312919
GSM2235700	0.663325	0.584672	0.617494	0.772759	0.45215	0.917276	0.612365	0.624614	0.783555	0.624091	0.629653	0.618137	0.581572	0.612081	0.570373	0.607978	0.531474	0.549004	0.637872	0.679223	0.716576	0.714574	0.337772
GSM2235701	0.560844	0.387304	0.618802	0.675309	0.228874	0.911655	0.531454	0.700459	0.848676	0.650911	0.620751	0.634258	0.597541	0.638765	0.56467	0.504521	0.494646	0.504866	0.605742	0.694789	0.757302	0.572773	0.305423
GSM2235702	0.795606	0.698932	0.721279	0.807952	0.328541	0.889903	0.444032	0.560309	0.723284	0.586115	0.633453	0.634436	0.591464	0.604961	0.594716	0.639567	0.537451	0.536265	0.594039	0.680497	0.705219	0.487341	0.370673
GSM2235703	0.65959	0.568577	0.647396	0.794157	0.476319	0.885463	0.575364	0.640826	0.79099	0.640719	0.636223	0.630921	0.569309	0.609706	0.5778	0.598981	0.532442	0.53301	0.606222	0.702346	0.714846	0.649488	0.321387
GSM2235704	0.56332	0.492565	0.577067	0.78156	0.387357	0.896935	0.476501	0.53885	0.737055	0.595625	0.634513	0.635412	0.587763	0.622695	0.577028	0.585673	0.553519	0.542582	0.602799	0.698252	0.724592	0.516385	0.33081
GSM2235705	0.572238	0.447983	0.593802	0.768205	0.372685	0.911278	0.424322	0.53264	0.731892	0.608455	0.631468	0.626253	0.605803	0.636613	0.572425	0.554612	0.554512	0.543259	0.597334	0.690685	0.723886	0.444564	0.310492
GSM2235706	0.661745	0.582532	0.607429	0.796464	0.451337	0.873593	0.415285	0.64656	0.818983	0.66636	0.640126	0.606127	0.598174	0.649047	0.559153	0.565552	0.536096	0.533418	0.606009	0.697855	0.731854	0.507783	0.295278
GSM2235707	0.681955	0.530368	0.615745	0.682174	0.380576	0.909953	0.551922	0.701878	0.818884	0.676303	0.620353	0.623822	0.570927	0.629177	0.563036	0.56254	0.525689	0.571831	0.637726	0.697598	0.74645	0.652777	0.358258
GSM2235708	0.599947	0.474377	0.583737	0.714023	0.338651	0.904783	0.624729	0.643258	0.79804	0.630913	0.620263	0.636361	0.587279	0.624859	0.554145	0.541762	0.522956	0.555629	0.627335	0.680985	0.717057	0.717625	0.373243
GSM2235709	0.550692	0.361442	0.60133	0.665854	0.393484	0.909237	0.707154	0.636281	0.804524	0.619384	0.588421	0.614892	0.581177	0.605601	0.513474	0.518778	0.507026	0.525316	0.573873	0.653483	0.70358	0.790334	0.398711
GSM2235710	0.71092	0.577071	0.692057	0.80133	0.522388	0.880734	0.531567	0.617156	0.759217	0.6155	0.617591	0.637681	0.57696	0.609451	0.584804	0.630881	0.514755	0.578493	0.652263	0.672534	0.714295	0.626274	0.331477
GSM2235711	0.624322	0.529472	0.693304	0.705627	0.336922	0.901089	0.680316	0.66258	0.821554	0.652939	0.623364	0.617673	0.587579	0.636709	0.554984	0.572871	0.527064	0.569603	0.604004	0.690063	0.73776	0.770278	0.411957
GSM2235712	0.473127	0.339793	0.575189	0.643843	0.0233096	0.897612	0.25366	0.620148	0.822096	0.65411	0.587576	0.619541	0.613756	0.630203	0.561558	0.491156	0.493614	0.494095	0.575569	0.719189	0.718652	0.299857	0.224174
GSM2235713	0.682564	0.580135	0.71318	0.80779	0.39948	0.862639	0.419493	0.501047	0.667599	0.58196	0.655709	0.636655	0.596349	0.593129	0.59039	0.591077	0.555638	0.518979	0.579542	0.690744	0.695392	0.452172	0.291388
GSM2235714	0.480708	0.361202	0.570576	0.650669	0.142985	0.888989	0.289275	0.633742	0.801892	0.648658	0.599834	0.624349	0.585635	0.598526	0.552766	0.489936	0.493172	0.495917	0.5686	0.674765	0.686348	0.31792	0.159513
GSM2235715	0.69431	0.540152	0.671546	0.670355	0.289075	0.977974	0.854937	0.698796	0.832079	0.679844	0.619912	0.624914	0.586276	0.679473	0.560171	0.567872	0.530565	0.595989	0.663425	0.697427	0.786888	0.951613	0.544357
GSM2235716	0.637138	0.591842	0.548055	0.755498	0.275405	0.862868	0.355379	0.743046	0.853605	0.674103	0.634923	0.632087	0.598657	0.620788	0.625253	0.552275	0.510306	0.51693	0.616703	0.693632	0.721191	0.413646	0.367778
GSM2235717	0.677857	0.671062	0.619933	0.849863	0.509519	0.938142	0.501137	0.507475	0.677227	0.580142	0.647716	0.626141	0.625595	0.615535	0.580037	0.648931	0.582103	0.543463	0.610166	0.691872	0.68798	0.568833	0.30101
GSM2235718	0.576525	0.489502	0.59676	0.772225	0.382489	0.925384	0.574503	0.47535	0.681581	0.572768	0.61479	0.60706	0.605458	0.643095	0.561923	0.580214	0.56813	0.540405	0.619401	0.688668	0.707564	0.641236	0.322548
GSM2235719	0.687814	0.647633	0.657771	0.789512	0.404095	0.922178	0.584912	0.608153	0.78959	0.637884	0.629818	0.610455	0.631963	0.630026	0.56954	0.618788	0.55933	0.552709	0.629499	0.687285	0.720462	0.687105	0.354663
GSM2235720	0.70471	0.626251	0.620103	0.76791	0.412973	0.925539	0.542635	0.626427	0.805634	0.6515	0.630455	0.626041	0.627323	0.626919	0.574418	0.632595	0.552535	0.525156	0.595385	0.688693	0.725754	0.630655	0.32893
GSM2235721	0.70874	0.637301	0.619616	0.801201	0.488407	0.901925	0.625093	0.695217	0.794808	0.669496	0.644217	0.635203	0.633585	0.637369	0.607751	0.65477	0.596545	0.554427	0.638613	0.70656	0.729253	0.724054	0.372782
GSM2235722	0.619187	0.609896	0.610211	0.814257	0.388842	0.955128	0.662694	0.541375	0.736693	0.60374	0.609457	0.603892	0.62704	0.637258	0.580297	0.627084	0.541015	0.561719	0.640448	0.686196	0.713009	0.745065	0.404001
GSM2235723	0.56752	0.50945	0.629751	0.705652	0.280421	0.897103	0.293221	0.592765	0.772666	0.632132	0.604608	0.611391	0.630969	0.603094	0.565617	0.558981	0.51257	0.483865	0.548282	0.651332	0.680459	0.357711	0.234509
GSM2235724	0.691187	0.661186	0.610858	0.835184	0.520152	0.927136	0.583161	0.613015	0.798656	0.665908	0.630484	0.613496	0.613171	0.633368	0.580756	0.644507	0.573341	0.577906	0.657385	0.704441	0.709823	0.674395	0.440783
GSM2235725	0.564677	0.625594	0.623665	0.820997	0.423181	0.942853	0.885279	0.636057	0.792195	0.666992	0.631737	0.621741	0.606801	0.686395	0.591816	0.64613	0.566782	0.610027	0.716393	0.723179	0.769402	0.97389	0.57944
GSM2235726	0.712028	0.562918	0.702403	0.779108	0.623233	0.975519	0.824035	0.531969	0.720598	0.608097	0.629564	0.642467	0.629568	0.653251	0.575699	0.600484	0.57175	0.616385	0.678942	0.70158	0.735401	0.922315	0.625193
GSM2235727	0.615093	0.45723	0.645132	0.729618	0.366932	0.910282	0.652588	0.479436	0.678312	0.574241	0.60245	0.617014	0.608799	0.625654	0.555154	0.548351	0.544656	0.539966	0.634355	0.678305	0.707501	0.747234	0.353951
GSM2235728	0.780148	0.699326	0.632662	0.811554	0.668595	0.922852	0.575889	0.586797	0.768373	0.62673	0.638609	0.62593	0.629041	0.597884	0.57796	0.632478	0.558639	0.538558	0.635582	0.679686	0.680901	0.66991	0.3258
GSM2235729	0.702007	0.582069	0.709153	0.817971	0.583713	0.922115	0.720139	0.599616	0.760805	0.638704	0.641971	0.609963	0.600202	0.635716	0.587089	0.632529	0.575082	0.566884	0.646802	0.703799	0.733731	0.818952	0.420612
GSM2235730	0.580499	0.446014	0.680505	0.735683	0.428503	0.918995	0.441744	0.661974	0.816005	0.683348	0.617401	0.59474	0.598956	0.637428	0.541158	0.533406	0.540429	0.531686	0.62764	0.67535	0.733608	0.489592	0.320786
GSM2235731	0.589314	0.34967	0.619555	0.570995	0.220176	0.963901	0.722068	0.679967	0.819125	0.666073	0.599395	0.616758	0.601728	0.669624	0.5206	0.514042	0.513994	0.543415	0.64071	0.680868	0.750909	0.776615	0.377301
GSM2235732	0.678444	0.648409	0.637881	0.769244	0.460086	0.924133	0.68521	0.65347	0.79486	0.660687	0.621766	0.618542	0.607262	0.606615	0.584817	0.58977	0.544175	0.569112	0.677342	0.68824	0.716128	0.76476	0.416088
GSM2235733	0.818428	0.706308	0.71487	0.838787	0.557268	0.942341	0.641403	0.653109	0.778444	0.646834	0.647414	0.623685	0.617063	0.65573	0.588675	0.660615	0.582441	0.572875	0.675619	0.714312	0.723205	0.740844	0.43787
GSM2235734	0.614645	0.459295	0.678885	0.67033	0.489947	0.920016	0.412189	0.629111	0.780792	0.646159	0.605803	0.622242	0.634252	0.614761	0.570413	0.55286	0.547947	0.545177	0.631345	0.67104	0.683392	0.475905	0.392236
GSM2235735	0.652898	0.533324	0.650974	0.75154	0.445258	0.947294	0.510208	0.675536	0.820837	0.684793	0.619229	0.614309	0.607171	0.65091	0.557128	0.5888	0.547576	0.582991	0.689064	0.71621	0.744088	0.543886	0.359598
GSM2235736	0.582865	0.429262	0.576255	0.644561	0.355406	0.780937	0.281045	0.712242	0.82912	0.674425	0.594004	0.626796	0.615188	0.623887	0.583353	0.549198	0.491062	0.49509	0.552467	0.671758	0.716608	0.292306	0.260061
GSM2235737	0.550926	0.526455	0.512823	0.741181	0.468868	0.916693	0.474093	0.550494	0.727585	0.602594	0.624872	0.628932	0.598634	0.610303	0.550907	0.578675	0.544442	0.578445	0.659671	0.675254	0.695202	0.522822	0.399548
GSM2235738	0.658257	0.580587	0.641168	0.764095	0.385739	0.947777	0.552151	0.621022	0.787014	0.62307	0.625583	0.628365	0.621204	0.666296	0.525163	0.583622	0.522569	0.537959	0.605935	0.678219	0.705149	0.577994	0.358798
GSM2235739	0.664568	0.576154	0.682065	0.71198	0.243898	0.910053	0.364067	0.678149	0.802513	0.678406	0.610483	0.623986	0.595422	0.668531	0.567965	0.578386	0.548351	0.523857	0.609602	0.691866	0.736068	0.463807	0.268997
GSM2235740	0.5294	0.456673	0.585427	0.695997	0.257188	0.940968	0.604645	0.536969	0.661289	0.567383	0.603212	0.610473	0.5854	0.670917	0.546725	0.508119	0.547765	0.544218	0.62776	0.68575	0.719736	0.63638	0.287511
GSM2235741	0.724753	0.650929	0.626638	0.812356	0.506495	0.871901	0.315644	0.683759	0.79895	0.644649	0.625232	0.624899	0.61715	0.622903	0.59048	0.619499	0.556463	0.518222	0.58963	0.684023	0.716877	0.396372	0.309905
GSM2235742	0.697167	0.576251	0.688729	0.752843	0.336072	0.933855	0.632696	0.653201	0.792192	0.663542	0.635367	0.61749	0.619121	0.649685	0.553483	0.577446	0.566567	0.558975	0.628505	0.705155	0.723184	0.738138	0.453292
GSM2235743	0.747092	0.599165	0.667007	0.769987	0.588755	0.92807	0.605042	0.633447	0.772964	0.647975	0.618758	0.627103	0.619847	0.639126	0.567319	0.615244	0.551	0.582972	0.66883	0.696237	0.723507	0.689123	0.430666
GSM2235744	0.628978	0.564657	0.650481	0.750144	0.642768	0.908774	0.394029	0.482239	0.655024	0.56666	0.613115	0.624241	0.61425	0.629244	0.564011	0.585609	0.557768	0.533156	0.602748	0.677737	0.688157	0.393799	0.254691
GSM2235745	0.608894	0.541823	0.63804	0.808297	0.534115	0.89399	0.761951	0.497606	0.717511	0.594743	0.630978	0.597749	0.55358	0.641903	0.58355	0.592997	0.554211	0.560536	0.584756	0.695244	0.730768	0.842665	0.41122
GSM2235746	0.568124	0.434678	0.658015	0.664919	0.405758	0.921901	0.627292	0.560864	0.670136	0.58493	0.590072	0.607179	0.559039	0.633475	0.556636	0.471991	0.506319	0.535177	0.63228	0.681522	0.709565	0.658117	0.270809
GSM2235747	0.748148	0.591044	0.519626	0.787838	0.402813	0.914586	0.669997	0.645434	0.795676	0.651733	0.633143	0.593497	0.554128	0.647805	0.560282	0.606167	0.538212	0.560144	0.628661	0.699163	0.746885	0.71602	0.411011
GSM2235748	0.458623	0.581139	0.588286	0.833954	0.641208	0.883567	0.562187	0.613052	0.776826	0.619943	0.627661	0.638144	0.599176	0.648068	0.579555	0.635997	0.553881	0.549932	0.610004	0.69746	0.718836	0.671749	0.318035
GSM2235749	0.451925	0.333494	0.489087	0.654946	0.194339	0.93305	0.323857	0.609305	0.78723	0.627868	0.597757	0.605203	0.58475	0.576676	0.548785	0.525075	0.505465	0.489662	0.578784	0.650251	0.688832	0.360961	0.206973
GSM2235750	0.708173	0.659438	0.666799	0.811915	0.412291	0.91244	0.372733	0.604361	0.778728	0.619524	0.646071	0.625531	0.629994	0.631733	0.576199	0.640573	0.572837	0.537985	0.622406	0.684493	0.710479	0.40939	0.297994
GSM2235751	0.600123	0.442233	0.328089	0.654673	0.253636	0.904934	0.751543	0.650151	0.812221	0.671492	0.60684	0.630482	0.597816	0.671755	0.527574	0.495578	0.51604	0.59773	0.64036	0.683274	0.769696	0.843469	0.492792
GSM2235752	0.568496	0.379637	0.618992	0.66872	0.36748	0.952314	0.840905	0.612407	0.763663	0.644335	0.626058	0.632181	0.590772	0.705934	0.562655	0.52441	0.56277	0.588071	0.644158	0.720219	0.763765	0.897595	0.505895
GSM2235753	0.632496	0.537177	0.651277	0.783638	0.511691	0.906801	0.74969	0.546847	0.746795	0.628775	0.63837	0.641089	0.616736	0.647449	0.582115	0.594974	0.573163	0.57479	0.659264	0.695329	0.719823	0.835383	0.438537
GSM2235754	0.875421	0.781129	0.747402	0.792109	0.642322	0.897292	0.457525	0.556217	0.730948	0.624481	0.646107	0.634462	0.614401	0.64038	0.6048	0.674782	0.587379	0.565009	0.66399	0.710467	0.725289	0.514089	0.4041
GSM2235755	0.784927	0.702133	0.71924	0.814482	0.589788	0.877915	0.591638	0.397344	0.644267	0.575726	0.672399	0.633233	0.608351	0.617082	0.615287	0.627508	0.597584	0.525355	0.585917	0.710384	0.711584	0.679635	0.31667
GSM2235756	0.71266	0.625005	0.665683	0.774076	0.648644	0.906278	0.602193	0.578864	0.744774	0.612833	0.637643	0.631701	0.604865	0.625071	0.588764	0.622239	0.56688	0.568657	0.627221	0.696248	0.707102	0.704391	0.43968
GSM2235757	0.720655	0.616934	0.637609	0.806767	0.419381	0.909519	0.494201	0.658458	0.824072	0.665696	0.638249	0.611758	0.592835	0.620321	0.573841	0.62652	0.558876	0.551154	0.62786	0.703012	0.735303	0.603128	0.400911
GSM2235758	0.541981	0.407793	0.567958	0.774839	0.257974	0.950975	0.337781	0.596886	0.800418	0.69145	0.633451	0.621589	0.618127	0.665774	0.58439	0.568002	0.550782	0.514114	0.538816	0.710365	0.754036	0.35762	0.286183
GSM2235759	0.811947	0.720619	0.668347	0.863747	0.714687	0.887076	0.557427	0.501298	0.705442	0.611318	0.680699	0.642289	0.608885	0.626669	0.626384	0.664752	0.624489	0.558849	0.607212	0.704034	0.70959	0.623052	0.331244
GSM2235760	0.743069	0.602041	0.68019	0.814374	0.64486	0.876608	0.478505	0.604111	0.782404	0.627967	0.632915	0.615901	0.621521	0.635071	0.567614	0.626435	0.570285	0.533952	0.591255	0.696473	0.733901	0.570243	0.319425
GSM2235761	0.716357	0.649548	0.626256	0.844586	0.696286	0.902226	0.580302	0.469577	0.694845	0.577259	0.646205	0.626878	0.614368	0.609462	0.586252	0.645055	0.591171	0.537957	0.612575	0.704494	0.694614	0.6451	0.312914
GSM2235762	0.625444	0.505907	0.657512	0.760513	0.415314	0.860756	0.475709	0.63952	0.808284	0.664299	0.636825	0.627845	0.61391	0.695301	0.569383	0.585051	0.557253	0.54297	0.618183	0.702266	0.75336	0.548573	0.389635
GSM2235763	0.543477	0.447248	0.669811	0.745737	0.48465	0.941971	0.680148	0.60992	0.800672	0.659841	0.637501	0.613259	0.610736	0.655712	0.555149	0.580896	0.56449	0.543946	0.593939	0.687812	0.736129	0.744379	0.414309
GSM2235764	0.561106	0.394562	0.572704	0.656937	0.199347	0.909458	0.533299	0.618801	0.776422	0.644011	0.614293	0.598473	0.595526	0.659707	0.517595	0.535159	0.546631	0.523858	0.60729	0.688775	0.734338	0.571354	0.311905
GSM2235765	0.79907	0.701961	0.704685	0.828516	0.633333	0.920253	0.595382	0.412706	0.656478	0.541054	0.65902	0.634548	0.653633	0.638446	0.600459	0.658981	0.595457	0.55878	0.624087	0.71014	0.724357	0.675926	0.374832
GSM2235766	0.514806	0.481892	0.520584	0.699433	0.350673	0.899125	0.422931	0.648776	0.820077	0.648648	0.60404	0.604172	0.60071	0.60947	0.533582	0.537874	0.52984	0.521235	0.614763	0.664233	0.727939	0.490287	0.271767
GSM2235767	0.719923	0.654179	0.671242	0.863038	0.634626	0.869869	0.492452	0.389307	0.623465	0.573629	0.68632	0.631504	0.616185	0.603511	0.608533	0.652801	0.624026	0.515589	0.572284	0.708841	0.688008	0.556672	0.323056
GSM2235768	0.835083	0.666811	0.709245	0.802311	0.452722	0.977348	0.884524	0.633318	0.782921	0.668571	0.660572	0.629853	0.623394	0.678444	0.586634	0.672433	0.579393	0.616567	0.67855	0.72168	0.786829	0.94785	0.58469
GSM2235769	0.662755	0.535717	0.590731	0.779229	0.344525	0.937735	0.402202	0.685563	0.838631	0.686262	0.654771	0.613547	0.627132	0.653173	0.588339	0.586518	0.560711	0.528429	0.617483	0.693568	0.743274	0.462291	0.333917
GSM2235770	0.594645	0.550085	0.526725	0.803805	0.354226	0.879454	0.597543	0.58485	0.742839	0.595578	0.620398	0.624738	0.609228	0.596519	0.600436	0.624656	0.568835	0.52512	0.574915	0.654322	0.661896	0.6847	0.318664
GSM2235771	0.643431	0.608737	0.569343	0.802816	0.501403	0.899938	0.570448	0.585604	0.757499	0.60685	0.633088	0.63182	0.600729	0.593164	0.607155	0.647369	0.568352	0.535351	0.604117	0.665978	0.680662	0.645201	0.306728
GSM2235772	0.645999	0.626294	0.617604	0.81061	0.537011	0.912858	0.555968	0.641458	0.796179	0.644146	0.642424	0.62429	0.60113	0.63338	0.607111	0.658964	0.569688	0.553551	0.628025	0.6909	0.710522	0.645162	0.336626
GSM2235773	0.664256	0.632011	0.622522	0.810713	0.481961	0.921972	0.602353	0.613515	0.764204	0.625281	0.648808	0.622067	0.606594	0.625243	0.599143	0.658531	0.570407	0.547915	0.614881	0.683571	0.7134	0.69296	0.351123
GSM2235774	0.65949	0.606141	0.637698	0.804223	0.403358	0.914567	0.577183	0.559853	0.715384	0.596415	0.642934	0.629447	0.607445	0.636787	0.590268	0.641277	0.567213	0.539515	0.596473	0.683376	0.712556	0.668393	0.350974
GSM2235775	0.606315	0.575401	0.624	0.801096	0.406591	0.925119	0.670574	0.549584	0.713687	0.591372	0.645249	0.617302	0.602279	0.610882	0.598432	0.630594	0.572075	0.545846	0.605649	0.671203	0.692122	0.764011	0.381641
GSM2235776	0.632536	0.612607	0.629222	0.80599	0.397597	0.923738	0.67549	0.5585	0.719118	0.59247	0.637517	0.614863	0.605215	0.623258	0.596616	0.641959	0.563664	0.544638	0.6165	0.682015	0.705521	0.770256	0.373624
GSM2235777	0.633244	0.588531	0.594237	0.803047	0.389965	0.934568	0.809538	0.600108	0.76064	0.62281	0.635275	0.621246	0.600161	0.641112	0.591235	0.644343	0.564945	0.557247	0.632158	0.697834	0.740833	0.9001	0.498681
GSM2235778	0.644721	0.580534	0.63275	0.800794	0.435639	0.86863	0.372446	0.582292	0.794516	0.639341	0.642001	0.610521	0.59844	0.665365	0.568765	0.631368	0.546433	0.529949	0.596038	0.708595	0.741477	0.429586	0.29697
GSM2235779	0.653379	0.46677	0.659619	0.741965	0.22929	0.979344	0.782868	0.739547	0.863687	0.688734	0.615495	0.595868	0.585658	0.680368	0.535488	0.557786	0.538553	0.560397	0.611668	0.67997	0.758199	0.881116	0.509821
GSM2235780	0.614517	0.578975	0.662512	0.727745	0.385488	0.930388	0.742615	0.602916	0.757948	0.605704	0.623317	0.607683	0.605482	0.649103	0.568502	0.615808	0.543944	0.567216	0.604231	0.698496	0.732826	0.842465	0.3959
GSM2235781	0.738246	0.554367	0.687315	0.768841	0.373054	0.94711	0.626583	0.644252	0.821526	0.649536	0.625566	0.617081	0.601845	0.608972	0.599622	0.584215	0.531622	0.546218	0.630728	0.66809	0.721778	0.724955	0.310569
GSM2235782	0.840058	0.677808	0.681429	0.81884	0.410407	0.907455	0.643246	0.603287	0.784871	0.637359	0.643048	0.606554	0.641232	0.645659	0.578889	0.684759	0.557081	0.563954	0.643971	0.710565	0.739246	0.734526	0.388459
GSM2235783	0.698768	0.667531	0.568365	0.818867	0.561839	0.89506	0.576354	0.470784	0.69783	0.578661	0.633018	0.621332	0.608962	0.63744	0.601876	0.640227	0.577501	0.535119	0.595296	0.701142	0.716405	0.66983	0.282534
GSM2235784	0.677648	0.480656	0.636176	0.706545	0.339596	0.960367	0.821819	0.672285	0.818926	0.642594	0.606328	0.61041	0.591356	0.698921	0.532392	0.588264	0.531388	0.585989	0.662448	0.712151	0.769162	0.919494	0.522469
GSM2235785	0.641773	0.507165	0.558093	0.785486	0.365761	0.975681	0.880429	0.6895	0.841046	0.662979	0.61851	0.607067	0.601405	0.692498	0.561327	0.563573	0.535081	0.61865	0.691298	0.704819	0.764755	0.968191	0.548039
GSM2235786	0.682116	0.661654	0.69577	0.842584	0.689158	0.906004	0.568442	0.405771	0.651976	0.561257	0.667854	0.646718	0.623503	0.591158	0.602297	0.628022	0.60972	0.539855	0.591	0.686506	0.666021	0.614871	0.35674
GSM2235787	0.719295	0.633067	0.71212	0.806929	0.641304	0.917908	0.493461	0.533167	0.714002	0.595589	0.658168	0.634217	0.615848	0.605874	0.601452	0.629937	0.600215	0.531281	0.612354	0.684576	0.697113	0.528037	0.253087
GSM2235788	0.67305	0.559209	0.654127	0.663446	0.412544	0.950763	0.782049	0.690984	0.828808	0.69399	0.62721	0.636843	0.583483	0.646459	0.557013	0.552137	0.547725	0.594447	0.67878	0.706808	0.757296	0.867309	0.572239
GSM2235789	0.597347	0.563799	0.630539	0.767924	0.358058	0.943951	0.728932	0.624358	0.795848	0.645338	0.630869	0.627655	0.588352	0.643354	0.588045	0.600251	0.572449	0.553134	0.607331	0.697551	0.734323	0.77614	0.48014
GSM2235790	0.569724	0.505566	0.590468	0.736572	0.334096	0.908258	0.538578	0.578001	0.762839	0.613057	0.631506	0.632876	0.587129	0.624681	0.550049	0.546759	0.541287	0.555992	0.599491	0.683563	0.701176	0.620904	0.374483
GSM2235791	0.761115	0.67732	0.731565	0.805003	0.588905	0.893237	0.569578	0.569892	0.726822	0.601741	0.650438	0.634146	0.590153	0.602826	0.598148	0.636323	0.554721	0.561719	0.60977	0.687498	0.701222	0.664445	0.361248
GSM2235792	0.745036	0.621157	0.697309	0.771205	0.425076	0.919035	0.509713	0.660316	0.786474	0.658987	0.638547	0.619085	0.578527	0.644934	0.576238	0.609873	0.552613	0.558332	0.618513	0.708935	0.723871	0.600861	0.370057
GSM2235793	0.851579	0.729132	0.745991	0.80638	0.695709	0.891386	0.584951	0.555333	0.721805	0.6057	0.672518	0.64176	0.594079	0.592895	0.602492	0.652287	0.568882	0.559695	0.65402	0.692301	0.691364	0.658603	0.360605
GSM2235794	0.687795	0.618509	0.70385	0.738299	0.511486	0.936531	0.723613	0.637075	0.824001	0.658083	0.629813	0.617414	0.591771	0.617764	0.57273	0.587122	0.518851	0.552361	0.630674	0.688047	0.729565	0.812417	0.456059
GSM2235795	0.821004	0.671669	0.719786	0.813745	0.471695	0.887575	0.339311	0.667334	0.807822	0.648325	0.63739	0.602683	0.607609	0.602623	0.589778	0.636582	0.55151	0.531764	0.640934	0.666392	0.713124	0.379452	0.305225
GSM2235796	0.787305	0.678638	0.720857	0.830966	0.620887	0.923998	0.556011	0.549197	0.735217	0.614576	0.653954	0.614922	0.603021	0.633569	0.584326	0.648129	0.574921	0.563049	0.644703	0.701116	0.716514	0.606758	0.318955
GSM2235797	0.593526	0.376802	0.613057	0.724831	0.293204	0.974337	0.713637	0.646284	0.796531	0.669793	0.644916	0.611048	0.630602	0.673019	0.533258	0.575072	0.578365	0.562683	0.629231	0.692255	0.741527	0.810834	0.439895
GSM2235798	0.702678	0.552077	0.618414	0.687543	0.343541	0.937408	0.461179	0.646826	0.825831	0.660549	0.617853	0.596475	0.609878	0.640161	0.536013	0.566813	0.521564	0.542844	0.60182	0.684777	0.743508	0.530061	0.323727
GSM2235799	0.630967	0.484651	0.68445	0.715763	0.340646	0.94756	0.467979	0.652975	0.833088	0.677534	0.626834	0.594301	0.606702	0.619703	0.539918	0.553432	0.514816	0.524734	0.57994	0.68063	0.725307	0.558224	0.298056
GSM2235800	0.648279	0.63513	0.589479	0.837431	0.42616	0.96249	0.752707	0.454292	0.675681	0.558953	0.645227	0.615183	0.618494	0.615729	0.568634	0.607782	0.579631	0.564999	0.62254	0.693563	0.701896	0.855485	0.446462
GSM2235801	0.620541	0.548059	0.589209	0.800471	0.515551	0.908701	0.546955	0.446158	0.671213	0.557704	0.6292	0.62224	0.599229	0.61896	0.565946	0.604903	0.56671	0.532013	0.610716	0.677682	0.682393	0.594855	0.341567
GSM2235802	0.661631	0.370701	0.684052	0.611294	0.314896	0.956053	0.787424	0.732037	0.857341	0.677965	0.616738	0.619805	0.555319	0.644286	0.575572	0.524912	0.503177	0.588883	0.660384	0.69226	0.761579	0.879185	0.52261
GSM2235803	0.627436	0.526976	0.669779	0.727644	0.217838	0.855728	0.653376	0.690694	0.820059	0.655941	0.623321	0.627533	0.574749	0.633957	0.558938	0.558428	0.521373	0.551926	0.598334	0.69253	0.741541	0.741236	0.367244
GSM2235804	0.573466	0.534541	0.720714	0.799372	0.434919	0.859468	0.557487	0.454693	0.62516	0.542131	0.650607	0.639202	0.585663	0.605635	0.574668	0.609263	0.580965	0.537259	0.591123	0.694263	0.695605	0.620625	0.329648
GSM2235805	0.606332	0.611463	0.621458	0.833032	0.550045	0.888413	0.381661	0.470512	0.632754	0.542929	0.665283	0.658083	0.608703	0.604121	0.633678	0.664537	0.588069	0.516534	0.584288	0.702424	0.699141	0.418637	0.282527
GSM2235806	0.468311	0.312701	0.593725	0.620441	0.204298	0.863101	0.356332	0.531982	0.714079	0.58242	0.618496	0.629583	0.577812	0.635068	0.516682	0.519918	0.53178	0.506216	0.569672	0.686568	0.701052	0.373264	0.289412
GSM2235807	0.6289	0.527227	0.634649	0.765941	0.543826	0.913887	0.528298	0.629023	0.79173	0.653652	0.634877	0.632105	0.598453	0.613297	0.576944	0.595921	0.544661	0.534114	0.635652	0.695404	0.711322	0.584834	0.264919
GSM2235808	0.579802	0.485094	0.666584	0.769716	0.33579	0.926872	0.713685	0.601762	0.764423	0.620378	0.647848	0.628091	0.582709	0.624459	0.558486	0.597902	0.561143	0.570366	0.60334	0.652608	0.706347	0.756497	0.457768
GSM2235809	0.568643	0.443857	0.648649	0.780561	0.276878	0.947076	0.82547	0.541836	0.772153	0.617373	0.632798	0.625547	0.572278	0.676443	0.553519	0.56093	0.542717	0.572702	0.64548	0.68723	0.761349	0.904125	0.43567
GSM2235810	0.675463	0.579444	0.603585	0.730048	0.283649	0.916315	0.515441	0.705906	0.841167	0.701042	0.630222	0.600885	0.589569	0.671641	0.553468	0.602562	0.533334	0.544913	0.626533	0.715222	0.754868	0.537474	0.325996
GSM2235811	0.712116	0.631781	0.707046	0.808607	0.447418	0.9178	0.631523	0.700624	0.845339	0.69225	0.662899	0.618332	0.599001	0.654332	0.583977	0.589858	0.543619	0.551391	0.604183	0.694459	0.74155	0.715507	0.355674
GSM2235812	0.676012	0.595154	0.57945	0.782916	0.338217	0.934648	0.506875	0.650278	0.797629	0.664698	0.634254	0.613383	0.615837	0.629533	0.570708	0.609051	0.539547	0.529767	0.572619	0.698453	0.739498	0.557863	0.274055
GSM2235813	0.490484	0.398884	0.592816	0.743845	0.365423	0.951187	0.632064	0.554593	0.751061	0.621692	0.638929	0.623756	0.607116	0.643959	0.562733	0.529147	0.5569	0.553774	0.647231	0.691817	0.727955	0.675059	0.334015
GSM2235814	0.715638	0.619863	0.648229	0.802378	0.503467	0.922409	0.689956	0.612463	0.78806	0.655817	0.645335	0.597685	0.596034	0.648332	0.56973	0.57646	0.563458	0.553503	0.61423	0.707324	0.746322	0.754163	0.367677
GSM2235815	0.415639	0.544189	0.587452	0.722721	0.291751	0.908426	0.636772	0.702823	0.864235	0.697172	0.64199	0.605623	0.555761	0.634571	0.542825	0.514306	0.508943	0.556363	0.632122	0.671669	0.736501	0.700228	0.282131
GSM2235816	0.639899	0.564284	0.598822	0.772397	0.517999	0.960398	0.668126	0.598575	0.776882	0.626661	0.634365	0.625802	0.607878	0.64851	0.576681	0.617786	0.558099	0.559972	0.631883	0.705138	0.733956	0.763353	0.335286
GSM2235817	0.62282	0.526276	0.538971	0.728479	0.427931	0.87468	0.518828	0.608683	0.786233	0.606963	0.599111	0.624162	0.592318	0.642353	0.533626	0.565765	0.53232	0.538997	0.623762	0.66101	0.70812	0.594091	0.287109
GSM2235818	0.650785	0.55639	0.623507	0.790352	0.28991	0.961326	0.806186	0.663734	0.833967	0.664219	0.629604	0.609358	0.589573	0.656578	0.581721	0.60113	0.541927	0.580992	0.660112	0.687873	0.756744	0.894806	0.479638
GSM2235819	0.739697	0.645101	0.632908	0.809929	0.399388	0.917895	0.401762	0.601501	0.817628	0.642226	0.616509	0.582414	0.602346	0.635396	0.585297	0.63257	0.537761	0.530379	0.601115	0.679754	0.719935	0.456659	0.271751
GSM2235820	0.738959	0.600838	0.700234	0.826923	0.57572	0.908025	0.60107	0.477484	0.716558	0.597207	0.645146	0.623934	0.616954	0.62127	0.587753	0.630625	0.578773	0.543464	0.604285	0.701167	0.7106	0.695983	0.339393
GSM2235821	0.587889	0.493881	0.643197	0.771867	0.361063	0.971232	0.780522	0.626755	0.819419	0.637403	0.618115	0.611105	0.611913	0.656927	0.57734	0.583047	0.532618	0.553251	0.608667	0.678026	0.736793	0.877394	0.433388
GSM2235822	0.612229	0.528552	0.613289	0.726623	0.355739	0.933141	0.500711	0.633452	0.841483	0.6489	0.595965	0.597001	0.6162	0.631359	0.579066	0.569797	0.490733	0.534753	0.595646	0.685385	0.735883	0.601333	0.407324
GSM2235823	0.700456	0.628807	0.672994	0.842888	0.534825	0.927381	0.616665	0.453602	0.657321	0.550289	0.652828	0.627127	0.600571	0.623533	0.61843	0.649211	0.591634	0.538405	0.585719	0.697367	0.697006	0.70319	0.343594
GSM2235824	0.635916	0.698066	0.615366	0.862266	0.520751	0.908104	0.58703	0.39059	0.63129	0.545725	0.651255	0.634623	0.61494	0.62118	0.619886	0.660512	0.608881	0.536203	0.574784	0.708874	0.704238	0.671709	0.321795
GSM2235825	0.719628	0.705928	0.675446	0.833471	0.618031	0.887266	0.491615	0.577433	0.780614	0.633078	0.652702	0.608623	0.642206	0.621035	0.599503	0.645572	0.573533	0.53537	0.620034	0.707943	0.710517	0.585616	0.310002
GSM2235826	0.734297	0.587142	0.642928	0.78165	0.38762	0.944083	0.584542	0.690511	0.834023	0.667237	0.646162	0.613252	0.625593	0.640773	0.599669	0.64006	0.560096	0.541985	0.638289	0.705826	0.743401	0.677735	0.382095
GSM2235827	0.664244	0.683631	0.553081	0.849119	0.657071	0.880477	0.530267	0.442808	0.657801	0.566994	0.652049	0.636469	0.605163	0.609618	0.596432	0.654127	0.609736	0.519119	0.584977	0.693362	0.678935	0.594212	0.283922
GSM2235828	0.829595	0.581126	0.759997	0.725876	0.451374	0.973465	0.856593	0.772305	0.829845	0.663681	0.641328	0.62656	0.597379	0.651737	0.580599	0.58376	0.548434	0.601878	0.659828	0.708518	0.757625	0.93441	0.644561
GSM2235829	0.705736	0.545578	0.674649	0.727738	0.276926	0.948353	0.705354	0.681148	0.828852	0.676589	0.640125	0.619407	0.581532	0.680792	0.550619	0.576855	0.555011	0.581958	0.624802	0.71611	0.769552	0.777768	0.397857
GSM2235830	0.592842	0.608051	0.635437	0.780904	0.220292	0.954963	0.33735	0.586837	0.761914	0.644535	0.627622	0.62077	0.609544	0.65604	0.589601	0.594975	0.535894	0.518044	0.584173	0.721158	0.748579	0.386011	0.225833
GSM2235831	0.549213	0.474629	0.572177	0.737391	0.3788	0.909889	0.507047	0.607528	0.770361	0.625806	0.632467	0.640846	0.599848	0.64398	0.581159	0.564409	0.535732	0.542971	0.601474	0.689495	0.739259	0.553424	0.234164
GSM2235837	0.711714	0.58358	0.660584	0.726693	0.502223	0.891927	0.583725	0.594752	0.787134	0.646853	0.672802	0.636157	0.566804	0.594898	0.570794	0.589649	0.59982	0.548224	0.596512	0.665272	0.69961	0.574201	0.319598
GSM2235838	0.431121	0.658378	0.569416	0.84168	0.51898	0.896706	0.575589	0.522253	0.744368	0.584427	0.681891	0.635299	0.58185	0.59995	0.587798	0.637421	0.598696	0.514474	0.5408	0.672457	0.675797	0.549701	0.26185
GSM2235839	0.586581	0.545348	0.585147	0.833712	0.446053	0.970125	0.635656	0.617893	0.786244	0.650139	0.676098	0.643002	0.60226	0.657767	0.585593	0.628078	0.604468	0.541014	0.595314	0.726466	0.755906	0.669352	0.306204
GSM2235840	0.752204	0.533369	0.660024	0.732986	0.488892	0.891391	0.533222	0.636858	0.860432	0.668977	0.615134	0.629754	0.601794	0.652224	0.594873	0.562784	0.515151	0.551053	0.619083	0.663969	0.756938	0.582926	0.313787
GSM2235841	0.688856	0.638278	0.604938	0.771326	0.577883	0.928662	0.587369	0.631188	0.780942	0.661016	0.659867	0.631779	0.596056	0.638797	0.595957	0.596009	0.58241	0.550397	0.622809	0.701836	0.731537	0.59921	0.344658
GSM2235842	0.652708	0.594657	0.598375	0.82254	0.394468	0.934124	0.422017	0.62104	0.837282	0.696521	0.677529	0.612868	0.642038	0.66555	0.608796	0.615525	0.565292	0.528173	0.577501	0.718448	0.784438	0.468067	0.219434
GSM2235843	0.668319	0.566023	0.628639	0.785574	0.56784	0.924996	0.585972	0.624857	0.783202	0.667652	0.661768	0.627738	0.585561	0.650227	0.575247	0.570222	0.584767	0.567101	0.651723	0.729577	0.737623	0.633437	0.300868
GSM2235844	0.627568	0.518102	0.590415	0.736275	0.39024	0.974786	0.807207	0.707603	0.863977	0.697778	0.652987	0.617315	0.581372	0.670352	0.552428	0.552461	0.561219	0.576402	0.636136	0.683462	0.785257	0.850837	0.408825
GSM2235845	0.643989	0.500185	0.617093	0.818838	0.425821	0.943914	0.698745	0.636103	0.836475	0.680168	0.67666	0.634528	0.569894	0.62769	0.560401	0.584765	0.599119	0.569737	0.614446	0.675966	0.731697	0.738227	0.36504
GSM2235846	0.673377	0.470132	0.723541	0.740423	0.46722	0.935567	0.549844	0.534204	0.718781	0.61426	0.637532	0.642207	0.597279	0.659127	0.576713	0.565337	0.56335	0.551242	0.619745	0.7193	0.741492	0.608449	0.332886
GSM2235847	0.657539	0.53108	0.613012	0.771046	0.423146	0.923015	0.882096	0.568118	0.780523	0.62471	0.622397	0.621108	0.587934	0.681293	0.576565	0.621032	0.558812	0.584879	0.653845	0.677736	0.761085	0.969525	0.542694
GSM2235848	0.752264	0.731625	0.679774	0.864791	0.636623	0.853439	0.50471	0.454639	0.672392	0.572305	0.652249	0.62938	0.613387	0.597389	0.625936	0.668632	0.594392	0.531043	0.562064	0.676311	0.672731	0.569818	0.314661
GSM2235849	0.734688	0.671301	0.569172	0.811092	0.403078	0.917446	0.573699	0.58607	0.769213	0.609025	0.633148	0.609316	0.598552	0.630407	0.596282	0.648568	0.562136	0.530981	0.579804	0.683778	0.714517	0.641892	0.302636
GSM2235850	0.641532	0.597366	0.59797	0.817699	0.51166	0.897598	0.578538	0.471402	0.69955	0.578689	0.630955	0.632259	0.596345	0.630931	0.588557	0.636567	0.567794	0.552561	0.614497	0.685284	0.70763	0.649046	0.359006
GSM2235851	0.626656	0.478065	0.591445	0.662406	0.318504	0.940856	0.518091	0.590879	0.765384	0.643404	0.615542	0.609741	0.59201	0.658214	0.543384	0.556879	0.54786	0.540956	0.621026	0.698188	0.739438	0.589424	0.27917
GSM2235852	0.602159	0.541127	0.493723	0.805355	0.494733	0.943378	0.636321	0.394593	0.656795	0.535675	0.614936	0.632713	0.62186	0.634201	0.566081	0.603619	0.588373	0.566776	0.608728	0.671502	0.693717	0.731472	0.390895
GSM2235853	0.549999	0.468649	0.540999	0.719049	0.349478	0.973699	0.791907	0.591824	0.781669	0.63642	0.615351	0.62271	0.61665	0.670805	0.548409	0.580386	0.556497	0.557757	0.644636	0.699286	0.744783	0.884308	0.486036
GSM2235854	0.630684	0.604684	0.562721	0.790724	0.431081	0.900768	0.64563	0.576667	0.786649	0.63964	0.630344	0.630296	0.625167	0.660793	0.580341	0.613366	0.55995	0.553413	0.578457	0.699467	0.73214	0.735486	0.424024
GSM2235855	0.629812	0.499422	0.576832	0.755375	0.455374	0.963782	0.873133	0.548619	0.762081	0.629496	0.623181	0.62589	0.60228	0.707091	0.57257	0.576348	0.569395	0.599433	0.636904	0.704214	0.764163	0.967583	0.552373
GSM2235862	0.736986	0.562215	0.680052	0.689102	0.426369	0.955171	0.900221	0.659443	0.80642	0.659747	0.622868	0.608815	0.589323	0.696286	0.563275	0.585433	0.534869	0.596148	0.676575	0.720507	0.790418	0.990312	0.617028
GSM2235863	0.611657	0.658195	0.592641	0.843115	0.502827	0.908525	0.456567	0.547531	0.688266	0.583504	0.648698	0.611146	0.605909	0.622754	0.582072	0.634798	0.574221	0.541451	0.598724	0.700154	0.70683	0.528832	0.297513
GSM2235864	0.585217	0.482181	0.576827	0.781993	0.406311	0.878144	0.435403	0.556647	0.721608	0.618096	0.619455	0.611857	0.58451	0.628836	0.557479	0.563999	0.551414	0.528947	0.596885	0.689201	0.703903	0.482423	0.251487
GSM2235865	0.591276	0.49569	0.55062	0.744125	0.393553	0.879118	0.425292	0.619802	0.807091	0.645173	0.618386	0.594875	0.569402	0.63113	0.544401	0.572892	0.518393	0.527289	0.5989	0.672375	0.714387	0.481971	0.26531
GSM2235866	0.797878	0.625772	0.729278	0.812634	0.369021	0.895018	0.596264	0.62085	0.750972	0.64496	0.64715	0.610915	0.592717	0.641379	0.596358	0.638117	0.560547	0.566594	0.62856	0.71084	0.744943	0.697558	0.418837
GSM2235867	0.667908	0.556702	0.576266	0.819973	0.457179	0.947541	0.76585	0.627412	0.787903	0.646097	0.636598	0.612528	0.589052	0.649112	0.57937	0.621563	0.562861	0.576907	0.628988	0.705162	0.750937	0.855983	0.472263
GSM2235878	0.557405	0.479858	0.519597	0.753166	0.387597	0.925755	0.684588	0.623912	0.793074	0.630786	0.617615	0.604496	0.586021	0.616911	0.557644	0.587068	0.531808	0.568925	0.65095	0.679647	0.726289	0.772787	0.345266
GSM2235879	0.808869	0.6817	0.627351	0.849139	0.473423	0.903515	0.641925	0.617085	0.763697	0.637223	0.636896	0.609447	0.593215	0.650844	0.602852	0.680377	0.562839	0.571036	0.66004	0.722074	0.735305	0.729973	0.433768
GSM2235880	0.681087	0.516173	0.643981	0.772111	0.574791	0.885122	0.587302	0.560821	0.748144	0.615108	0.63417	0.624914	0.593875	0.630732	0.575157	0.567003	0.562833	0.543553	0.6009	0.678197	0.703211	0.647346	0.351415
GSM2235881	0.627282	0.562131	0.564877	0.780485	0.429312	0.903129	0.3811	0.566169	0.742037	0.608539	0.626263	0.611242	0.574343	0.649198	0.566791	0.58748	0.551751	0.538383	0.614882	0.691028	0.725154	0.419723	0.297764
GSM2235882	0.673167	0.605225	0.601389	0.776428	0.54358	0.896288	0.704145	0.54482	0.730963	0.604291	0.634578	0.619291	0.590286	0.634953	0.579856	0.60357	0.556527	0.571584	0.631985	0.6887	0.732143	0.795086	0.385064
GSM2235883	0.676963	0.5949	0.634987	0.80737	0.650585	0.89152	0.566871	0.545237	0.767142	0.62462	0.63799	0.627443	0.59829	0.617346	0.588568	0.61586	0.564132	0.531265	0.621286	0.676196	0.710468	0.635908	0.354881
GSM2235884	0.706724	0.620852	0.576315	0.769818	0.61585	0.904357	0.675813	0.479747	0.679508	0.563263	0.642351	0.642569	0.61566	0.612466	0.581746	0.616095	0.577201	0.567001	0.634866	0.67862	0.693727	0.777128	0.437415
GSM2235885	0.716224	0.627449	0.63329	0.822511	0.472257	0.957623	0.823565	0.658341	0.782699	0.627603	0.655461	0.627933	0.612731	0.646922	0.577695	0.664839	0.57378	0.604056	0.672168	0.687269	0.727873	0.922019	0.542051
GSM2235886	0.799117	0.697429	0.720674	0.797235	0.489752	0.903882	0.397228	0.693485	0.830765	0.669053	0.663376	0.619349	0.600447	0.611037	0.582226	0.650532	0.55629	0.550861	0.639092	0.690164	0.711915	0.43797	0.352589
GSM2235887	0.609202	0.58778	0.563998	0.759733	0.464188	0.892552	0.51069	0.62107	0.821604	0.646987	0.635344	0.611383	0.60826	0.607193	0.599428	0.617601	0.53861	0.516285	0.583155	0.703417	0.729306	0.618199	0.343728
GSM2235888	0.568197	0.460184	0.558636	0.757531	0.448751	0.90055	0.435055	0.501398	0.709681	0.584417	0.613633	0.623387	0.588118	0.632419	0.551199	0.574033	0.557154	0.504689	0.580592	0.672556	0.698305	0.442095	0.243058
GSM2235889	0.446549	0.491452	0.428146	0.701824	0.199896	0.912266	0.449254	0.553023	0.736496	0.578935	0.606165	0.6318	0.589829	0.61981	0.533433	0.563703	0.526403	0.520313	0.620116	0.686224	0.687641	0.515346	0.347493
GSM2235899	0.74521	0.628595	0.703479	0.774326	0.487491	0.923169	0.583299	0.654521	0.780008	0.626707	0.628506	0.609828	0.593211	0.622474	0.590379	0.613379	0.538002	0.555552	0.611001	0.702254	0.714904	0.674383	0.345115
GSM2235900	0.708451	0.530244	0.644254	0.660623	0.519907	0.921838	0.657176	0.576944	0.742863	0.631171	0.627478	0.623849	0.58589	0.652972	0.552254	0.584958	0.557653	0.588137	0.643704	0.709401	0.728612	0.752376	0.440568
GSM2235901	0.634183	0.593643	0.619368	0.783046	0.500475	0.937148	0.427103	0.666822	0.791308	0.658574	0.64024	0.614708	0.599741	0.645383	0.603027	0.614899	0.556304	0.550021	0.640739	0.731714	0.75265	0.529717	0.307234
GSM2235902	0.686484	0.698199	0.551961	0.840996	0.664996	0.879543	0.555637	0.4326	0.638059	0.574034	0.652446	0.62256	0.594603	0.633676	0.598121	0.618807	0.599844	0.53713	0.575245	0.703563	0.70569	0.616887	0.32214
GSM2235903	0.658957	0.645805	0.571297	0.833398	0.539307	0.85166	0.476272	0.623771	0.761166	0.60894	0.65286	0.628711	0.625571	0.634786	0.589586	0.632571	0.558972	0.537236	0.615104	0.683931	0.74366	0.56413	0.334746
GSM2235904	0.690192	0.666023	0.607458	0.84153	0.626775	0.90621	0.317091	0.56825	0.757295	0.621022	0.651978	0.625263	0.613822	0.629425	0.586616	0.638737	0.58082	0.521468	0.572524	0.711394	0.736681	0.374843	0.255531
GSM2235905	0.734503	0.588418	0.669784	0.824648	0.544541	0.916605	0.644209	0.476877	0.687453	0.583853	0.65275	0.637377	0.579274	0.638448	0.565432	0.624491	0.589787	0.56883	0.609402	0.720046	0.720828	0.737506	0.429727
GSM2235906	0.682372	0.597242	0.622896	0.747913	0.357672	0.939552	0.519786	0.677672	0.821076	0.67351	0.640837	0.60422	0.576682	0.64853	0.548302	0.591648	0.534357	0.549543	0.671435	0.703761	0.723194	0.603011	0.347566
GSM2235907	0.671224	0.518948	0.591872	0.773191	0.340084	0.971754	0.766601	0.749871	0.846226	0.702778	0.660191	0.635593	0.611824	0.67371	0.567397	0.62427	0.567199	0.589532	0.685842	0.710444	0.762574	0.858513	0.481407
GSM2235908	0.640402	0.58192	0.609004	0.801899	0.57768	0.904692	0.391158	0.518751	0.700096	0.580931	0.628008	0.624112	0.617411	0.603568	0.592479	0.637229	0.57026	0.513494	0.577923	0.681409	0.676665	0.415335	0.253403
GSM2235909	0.6934	0.560733	0.623565	0.778519	0.590135	0.927552	0.693157	0.629861	0.795763	0.668678	0.632708	0.603215	0.622047	0.664891	0.55179	0.583524	0.558756	0.565443	0.638011	0.724542	0.751606	0.791942	0.392838
GSM2235910	0.702508	0.574627	0.634838	0.794359	0.462148	0.982841	0.802587	0.672379	0.805298	0.656193	0.641219	0.623943	0.587878	0.661702	0.59779	0.631931	0.57708	0.60289	0.68187	0.72456	0.744235	0.900861	0.602382
GSM2235921	0.51984	0.499291	0.582019	0.75382	0.273424	0.918445	0.362916	0.678578	0.821959	0.656662	0.635447	0.616935	0.610584	0.618688	0.558386	0.552634	0.549373	0.514048	0.564156	0.685284	0.712764	0.392883	0.251239
GSM2235922	0.547645	0.517321	0.578853	0.756271	0.411643	0.960754	0.764945	0.619466	0.80121	0.639937	0.629434	0.621909	0.641014	0.621846	0.565486	0.561721	0.544255	0.565132	0.632157	0.701517	0.728167	0.860995	0.528412
GSM2235923	0.622403	0.528577	0.660265	0.749767	0.335746	0.905229	0.459255	0.578731	0.720324	0.625067	0.628656	0.599882	0.592593	0.645681	0.540277	0.591724	0.563863	0.521966	0.596212	0.713059	0.681678	0.507345	0.283813
GSM2235924	0.559004	0.557837	0.580923	0.824919	0.461939	0.898102	0.5019	0.579529	0.754163	0.618339	0.638125	0.637428	0.628263	0.640402	0.594714	0.640017	0.554176	0.536692	0.613726	0.704166	0.724377	0.572008	0.284348
GSM2235925	0.5401	0.560165	0.542332	0.736926	0.422441	0.913044	0.376675	0.553263	0.742924	0.608456	0.644002	0.631591	0.623836	0.634934	0.549136	0.594216	0.554223	0.515366	0.607627	0.67514	0.693463	0.406753	0.297918
GSM2235926	0.69086	0.58685	0.716131	0.79687	0.570123	0.949323	0.830067	0.589922	0.777757	0.629415	0.648957	0.63502	0.605582	0.678748	0.580999	0.619788	0.577065	0.592499	0.654873	0.704071	0.762622	0.924329	0.570414
GSM2235927	0.502777	0.447071	0.510988	0.750227	0.356972	0.931401	0.326088	0.641942	0.799439	0.647981	0.623491	0.601589	0.604924	0.646252	0.557075	0.568082	0.534846	0.50951	0.586927	0.694096	0.72834	0.380643	0.246168
GSM2235928	0.694402	0.608125	0.585124	0.787042	0.308469	0.899604	0.448724	0.685501	0.797225	0.656716	0.64734	0.62553	0.614301	0.632206	0.581745	0.623853	0.559653	0.516671	0.610183	0.694985	0.717374	0.514422	0.27485
GSM2235929	0.608086	0.710665	0.473238	0.866406	0.733589	0.887417	0.557214	0.424978	0.643014	0.571261	0.665124	0.647068	0.62159	0.621755	0.593621	0.648466	0.612343	0.557861	0.62036	0.713939	0.681426	0.628427	0.363722
GSM2235930	0.509979	0.523783	0.549685	0.833658	0.492374	0.927022	0.381749	0.501219	0.691597	0.569035	0.634284	0.624149	0.633547	0.588863	0.564322	0.616551	0.562288	0.531379	0.609488	0.668357	0.658745	0.404949	0.361699
GSM2235931	0.543605	0.454354	0.554297	0.705	0.301829	0.937312	0.70234	0.616088	0.768202	0.622774	0.61131	0.619023	0.596386	0.662805	0.544268	0.548069	0.543215	0.544685	0.612976	0.688475	0.731352	0.776232	0.393371
GSM2235932	0.565109	0.393883	0.598026	0.675487	0.0888773	0.892179	0.619698	0.57648	0.749533	0.595453	0.608796	0.614089	0.607318	0.667648	0.510204	0.569941	0.564457	0.548236	0.631902	0.71325	0.737031	0.711446	0.384265
GSM2235933	0.775368	0.733871	0.660624	0.850595	0.771033	0.893976	0.546473	0.49057	0.635509	0.5649	0.663927	0.62583	0.612131	0.611184	0.626741	0.656457	0.598738	0.556175	0.685493	0.6931	0.691868	0.580955	0.367641
GSM2235934	0.799401	0.603294	0.699812	0.785865	0.527749	0.982763	0.890269	0.609629	0.793126	0.632369	0.650046	0.622443	0.594439	0.698239	0.558453	0.620888	0.568869	0.626661	0.690464	0.740368	0.789115	0.980513	0.650466
GSM2235935	0.660368	0.575776	0.703768	0.776281	0.499056	0.899092	0.569886	0.528953	0.702952	0.599304	0.626859	0.610939	0.564178	0.63341	0.568647	0.575243	0.545004	0.559254	0.607511	0.697302	0.712277	0.655485	0.317004
GSM2235936	0.659054	0.474464	0.674198	0.720356	0.549411	0.874509	0.421937	0.573443	0.759076	0.638422	0.609591	0.607069	0.602538	0.624253	0.560017	0.510974	0.528415	0.541449	0.612628	0.689351	0.714116	0.509195	0.233031
GSM2235937	0.599702	0.499781	0.642398	0.681436	0.428667	0.907468	0.383195	0.646274	0.787456	0.664371	0.635553	0.609118	0.596921	0.634454	0.55316	0.557152	0.522372	0.537809	0.613035	0.690752	0.718219	0.429295	0.261411
GSM2235938	0.617806	0.369724	0.714739	0.616731	0.405702	0.912108	0.530579	0.696675	0.836994	0.688986	0.614701	0.600989	0.584643	0.682481	0.542379	0.504905	0.488372	0.537017	0.609687	0.682	0.740195	0.621385	0.278589
GSM2235939	0.734463	0.580801	0.722582	0.769937	0.63029	0.884343	0.528229	0.446613	0.618212	0.549614	0.632574	0.626552	0.602925	0.610641	0.591445	0.582175	0.568012	0.53154	0.595948	0.692271	0.692809	0.616791	0.312095
GSM2235940	0.740242	0.575749	0.653975	0.762322	0.598644	0.935714	0.791025	0.55382	0.739481	0.624849	0.633234	0.621402	0.584729	0.646605	0.574402	0.585668	0.563903	0.560142	0.636074	0.711795	0.731929	0.884877	0.378694
GSM2235941	0.685611	0.532412	0.636119	0.721313	0.439578	0.962003	0.82373	0.6926	0.830337	0.674488	0.618715	0.615811	0.594911	0.680103	0.583207	0.588113	0.534127	0.616121	0.706192	0.732511	0.770256	0.915744	0.542944
GSM2235942	0.573297	0.413736	0.599344	0.68479	0.424657	0.908467	0.604208	0.599982	0.776606	0.657954	0.618601	0.605918	0.587225	0.653977	0.551085	0.526112	0.522182	0.539693	0.615469	0.703791	0.736951	0.682351	0.296915
GSM2235943	0.638305	0.632549	0.581305	0.790303	0.473951	0.963447	0.891884	0.658176	0.828842	0.674495	0.641171	0.610742	0.601027	0.679474	0.572142	0.589355	0.544266	0.579352	0.657086	0.701533	0.785505	0.983452	0.596449
GSM2235944	0.569498	0.643332	0.499512	0.857247	0.746278	0.914465	0.511453	0.41676	0.628069	0.552613	0.664594	0.642586	0.640493	0.633586	0.582009	0.625218	0.624648	0.535375	0.588972	0.702186	0.680115	0.555595	0.324164
GSM2235945	0.702177	0.637822	0.615842	0.839849	0.496302	0.929387	0.513628	0.533703	0.74212	0.597587	0.620018	0.604709	0.630277	0.62226	0.592771	0.639269	0.552472	0.564896	0.626617	0.69625	0.717876	0.627793	0.403648
GSM2235946	0.514784	0.425059	0.596878	0.654856	0.354069	0.932454	0.536101	0.565611	0.7669	0.598493	0.618873	0.607943	0.639295	0.58628	0.524983	0.554376	0.545206	0.537846	0.598697	0.639494	0.674033	0.628275	0.386993
GSM2235947	0.589973	0.427967	0.633673	0.672984	0.247634	0.982295	0.799969	0.646666	0.827012	0.647964	0.608822	0.610663	0.602567	0.658171	0.540701	0.523255	0.527118	0.578052	0.652556	0.674929	0.735935	0.886081	0.525518
GSM2235948	0.72121	0.750961	0.564492	0.852683	0.853581	0.867985	0.56947	0.414318	0.636416	0.564604	0.683468	0.645992	0.631354	0.604283	0.595726	0.648089	0.614023	0.552429	0.641768	0.714164	0.677952	0.623314	0.320396
GSM2235949	0.630662	0.546758	0.639223	0.754696	0.525198	0.966889	0.780995	0.587841	0.742239	0.627333	0.64026	0.624209	0.61855	0.680762	0.562261	0.608273	0.578236	0.598679	0.651258	0.72303	0.753281	0.875328	0.526232
GSM2235950	0.498105	0.631516	0.439235	0.864878	0.7321	0.879583	0.523706	0.352513	0.575064	0.545589	0.667839	0.627906	0.595803	0.619075	0.584869	0.642805	0.637403	0.502807	0.575736	0.724815	0.675142	0.555864	0.276388
GSM2235951	0.64032	0.752552	0.559279	0.871483	0.686922	0.873722	0.532974	0.454823	0.636247	0.561902	0.676057	0.637341	0.623022	0.628987	0.603428	0.670779	0.632175	0.533969	0.582506	0.713186	0.694304	0.622474	0.334922
GSM2235952	0.550692	0.50676	0.568761	0.765474	0.267837	0.924434	0.790507	0.621725	0.763827	0.621884	0.608133	0.601164	0.612027	0.680504	0.574103	0.615966	0.55461	0.557919	0.649734	0.704377	0.752941	0.871722	0.427741
GSM2235953	0.543389	0.521791	0.556473	0.812987	0.425617	0.912401	0.301835	0.568331	0.728282	0.62677	0.63792	0.613046	0.610542	0.6295	0.597853	0.602001	0.567377	0.499613	0.554471	0.706801	0.715764	0.330142	0.165696
GSM2235954	0.668537	0.576922	0.69358	0.734442	0.395272	0.919823	0.800344	0.614542	0.780002	0.638259	0.632964	0.612896	0.609863	0.655101	0.58154	0.58938	0.541892	0.582795	0.645499	0.706231	0.749355	0.896143	0.490379
GSM2235955	0.759986	0.649039	0.714335	0.818961	0.269913	0.901817	0.646996	0.613614	0.794052	0.637977	0.638758	0.595706	0.613572	0.646637	0.597841	0.645736	0.557664	0.545754	0.598792	0.703604	0.734231	0.751268	0.419894
GSM2235956	0.609797	0.469424	0.603184	0.75167	0.367229	0.915038	0.454002	0.609557	0.791409	0.656101	0.634708	0.6251	0.610645	0.653665	0.550683	0.63434	0.564224	0.539414	0.598004	0.711151	0.727016	0.520672	0.290924
GSM2235957	0.654765	0.586777	0.633058	0.796552	0.369083	0.959665	0.712255	0.640167	0.801743	0.660039	0.629947	0.612236	0.609899	0.649344	0.558999	0.595765	0.554823	0.567304	0.640821	0.69631	0.739486	0.806415	0.434815
GSM2235958	0.588181	0.606113	0.579584	0.847429	0.747133	0.882949	0.374521	0.463319	0.652296	0.564628	0.648816	0.632443	0.644946	0.64142	0.576952	0.631218	0.595953	0.516644	0.591737	0.714145	0.69708	0.428241	0.314974
GSM2235959	0.37794	0.466914	0.619983	0.645431	0.263716	0.935258	0.580557	0.706833	0.848655	0.679133	0.633064	0.612109	0.602839	0.636204	0.536879	0.55193	0.506815	0.526798	0.600545	0.664334	0.73755	0.66942	0.38654
GSM2235960	0.637176	0.48201	0.632082	0.731543	0.274941	0.941275	0.568793	0.673034	0.823251	0.657149	0.622272	0.613356	0.598746	0.662888	0.549692	0.579522	0.530058	0.556832	0.662853	0.689074	0.739683	0.640993	0.32187
GSM2235961	0.824245	0.739858	0.741104	0.861155	0.66652	0.878926	0.423309	0.518769	0.713356	0.59518	0.671545	0.628155	0.638693	0.625815	0.598502	0.658716	0.591435	0.537628	0.612569	0.716229	0.693467	0.463883	0.353005
GSM2235962	0.479451	0.642423	0.647593	0.814358	0.372803	0.973889	0.704238	0.579574	0.731827	0.596465	0.639702	0.608487	0.625957	0.669186	0.574886	0.642256	0.576354	0.59306	0.673798	0.722783	0.729264	0.790956	0.43437
GSM2235963	0.535941	0.474337	0.574053	0.707461	0.225741	0.939295	0.340369	0.627979	0.813814	0.672176	0.620698	0.614743	0.601118	0.663149	0.554425	0.548274	0.50652	0.514967	0.594492	0.696887	0.719262	0.406437	0.232499
GSM2235964	0.614988	0.475777	0.691956	0.747076	0.512377	0.928468	0.766573	0.612609	0.79023	0.64107	0.630058	0.633668	0.61077	0.66272	0.570611	0.581741	0.560049	0.562098	0.623022	0.698376	0.739522	0.863939	0.463355
GSM2235965	0.482478	0.432949	0.672321	0.589773	0.100647	0.859181	0.584986	0.560659	0.745882	0.578299	0.628164	0.609261	0.648615	0.647522	0.499992	0.564091	0.548878	0.502733	0.560705	0.698121	0.707053	0.634188	0.564758
GSM2235966	0.615856	0.510699	0.580138	0.739858	0.60504	0.896355	0.554314	0.433675	0.587851	0.54845	0.635372	0.646042	0.586166	0.635891	0.584065	0.539022	0.55106	0.530362	0.576671	0.702605	0.699798	0.602046	0.328533
GSM2235967	0.514797	0.337072	0.51574	0.6392	0.28016	0.939827	0.26662	0.599292	0.792281	0.610017	0.600359	0.643408	0.633803	0.608858	0.562864	0.496496	0.525813	0.485312	0.513802	0.678143	0.728011	0.265574	0.210456
GSM2235968	0.619865	0.442556	0.461205	0.632133	0.208615	0.880848	0.381238	0.445626	0.57975	0.542293	0.648652	0.651463	0.564816	0.67593	0.582698	0.549787	0.532208	0.550033	0.581522	0.724515	0.766202	0.413134	0.264031
GSM2235969	0.558365	0.504467	0.631123	0.667519	0.269743	0.909113	0.662217	0.541848	0.722439	0.570832	0.600588	0.625581	0.61989	0.666056	0.500466	0.553754	0.529277	0.54663	0.614105	0.701492	0.715313	0.751132	0.507582
GSM2235970	0.667786	0.707119	0.64223	0.816482	0.507863	0.915221	0.611241	0.510647	0.657093	0.553827	0.637437	0.616641	0.637652	0.601047	0.59062	0.669041	0.570646	0.551657	0.590551	0.685924	0.679507	0.677183	0.381571
GSM2235971	0.658685	0.641728	0.66459	0.773133	0.402649	0.8967	0.554304	0.491094	0.652688	0.531159	0.630243	0.633204	0.619752	0.601223	0.564702	0.618283	0.546196	0.533539	0.576662	0.668995	0.69179	0.626191	0.429677
GSM2235972	0.496332	0.313876	0.662049	0.618527	0.257209	0.883195	0.564202	0.591223	0.763951	0.606818	0.613247	0.630176	0.606714	0.666557	0.509467	0.488344	0.506628	0.511568	0.589232	0.695094	0.715742	0.604943	0.350831
GSM2235973	0.580485	0.419655	0.587461	0.680529	0.348562	0.918566	0.311118	0.482898	0.674178	0.560988	0.582674	0.623167	0.64747	0.605374	0.545574	0.553409	0.542035	0.494555	0.566639	0.674637	0.653869	0.290945	0.30091
GSM2235974	0.52333	0.366267	0.650062	0.652593	0.215447	0.875046	0.465022	0.584095	0.781652	0.60499	0.601424	0.623309	0.598247	0.614224	0.516666	0.502628	0.493149	0.497003	0.589625	0.699762	0.701038	0.51333	0.323712
GSM2235975	0.468702	0.328009	0.513583	0.593186	0.272463	0.924621	0.801115	0.565944	0.748491	0.614073	0.60698	0.619854	0.588367	0.682296	0.507723	0.484689	0.532797	0.558399	0.622562	0.711436	0.754973	0.894557	0.52177
GSM2235976	0.349878	0.38206	0.544759	0.640663	0.223812	0.959454	0.847118	0.596324	0.768927	0.600892	0.622626	0.626925	0.585361	0.716035	0.506198	0.519643	0.532664	0.552552	0.62104	0.722733	0.774466	0.931756	0.610405
GSM2235977	0.51701	0.600501	0.48934	0.862968	0.435243	0.864157	0.318903	0.531553	0.689207	0.58102	0.640801	0.621309	0.621568	0.612438	0.565965	0.634283	0.578525	0.502042	0.570981	0.696357	0.69795	0.339565	0.198669
GSM2235978	0.679708	0.508685	0.665216	0.691048	0.62026	0.970111	0.858546	0.565592	0.743665	0.623342	0.626326	0.632229	0.622817	0.664753	0.569822	0.584338	0.561921	0.592446	0.65114	0.700847	0.75754	0.951781	0.54486
GSM2235979	0.641079	0.558464	0.572834	0.778671	0.663217	0.915577	0.443337	0.561729	0.730618	0.620033	0.640537	0.620925	0.602902	0.625224	0.567091	0.596175	0.548882	0.53226	0.613596	0.703656	0.711367	0.481839	0.29423
GSM2235980	0.568345	0.436782	0.595417	0.754433	0.469136	0.955782	0.77551	0.529753	0.707331	0.574565	0.617897	0.623743	0.623213	0.64049	0.531201	0.604398	0.551028	0.585725	0.683094	0.678244	0.708955	0.851222	0.441691
GSM2235981	0.60298	0.551226	0.629945	0.734504	0.305118	0.970622	0.741668	0.614151	0.754178	0.630125	0.615322	0.619938	0.607443	0.700835	0.555341	0.581681	0.544022	0.589219	0.657893	0.713261	0.757025	0.837106	0.524704
GSM2235982	0.652023	0.612755	0.65843	0.825404	0.485144	0.927645	0.602903	0.55036	0.714352	0.59757	0.631895	0.619569	0.61329	0.637496	0.565651	0.642467	0.581132	0.578173	0.653879	0.712091	0.708482	0.706	0.416398
GSM2235983	0.665157	0.584322	0.682897	0.810989	0.604028	0.950365	0.820114	0.584962	0.745836	0.623289	0.626325	0.635132	0.598858	0.668391	0.564347	0.592235	0.545531	0.614163	0.686087	0.710567	0.73554	0.917273	0.598024
GSM2235984	0.548369	0.512754	0.5422	0.75103	0.476347	0.928334	0.595182	0.626294	0.792507	0.65842	0.62813	0.612449	0.60408	0.645565	0.558719	0.564226	0.564239	0.545609	0.616881	0.696206	0.730753	0.676505	0.345299
GSM2235985	0.528742	0.541375	0.462524	0.802716	0.328029	0.917415	0.506335	0.516056	0.677815	0.58163	0.624121	0.628133	0.638724	0.636293	0.555548	0.599432	0.559028	0.575303	0.649749	0.696724	0.701552	0.580071	0.383448
GSM2235986	0.577965	0.50422	0.580738	0.727314	0.391027	0.896369	0.50907	0.592742	0.764671	0.637696	0.61674	0.617705	0.585113	0.625329	0.556091	0.54264	0.519196	0.530738	0.624998	0.689924	0.709234	0.596941	0.303459
GSM2235987	0.7661	0.66276	0.694946	0.817529	0.481644	0.951253	0.735739	0.608135	0.755865	0.619178	0.634525	0.617588	0.602631	0.618399	0.580104	0.651289	0.556968	0.576727	0.659475	0.696889	0.710688	0.823363	0.474524
GSM2235988	0.592769	0.527478	0.635409	0.737405	0.571797	0.89733	0.47064	0.59205	0.750479	0.627446	0.628465	0.624577	0.591104	0.637262	0.575134	0.54348	0.53484	0.519615	0.595677	0.691632	0.702932	0.51241	0.220466
GSM2235991	0.701819	0.638507	0.652716	0.827793	0.284361	0.918731	0.590748	0.469199	0.723516	0.615621	0.646771	0.591583	0.61644	0.621023	0.575891	0.602543	0.582915	0.559042	0.613591	0.695571	0.725722	0.661975	0.416998
GSM2235992	0.575469	0.583524	0.584909	0.7848	0.654285	0.911201	0.505639	0.509723	0.729877	0.601196	0.631275	0.610301	0.619845	0.634861	0.581266	0.608273	0.572436	0.530286	0.611968	0.700503	0.708352	0.528748	0.291462
GSM2235993	0.613601	0.512566	0.61166	0.773422	0.543648	0.973796	0.851431	0.542695	0.733006	0.603325	0.629282	0.62335	0.610739	0.676335	0.573122	0.585907	0.559114	0.586966	0.640386	0.701598	0.742382	0.947435	0.544172
GSM2235994	0.276739	0.648921	0.274076	0.857849	0.469024	0.862	0.315209	0.356939	0.584672	0.573813	0.67431	0.624638	0.610456	0.624063	0.576088	0.616685	0.673411	0.476259	0.552996	0.729906	0.679459	0.267066	0.281386
GSM2235995	0.572596	0.463255	0.602386	0.751892	0.351716	0.916427	0.579068	0.698115	0.845654	0.667143	0.612977	0.606532	0.596033	0.650734	0.543171	0.583447	0.522325	0.542265	0.62242	0.693296	0.742105	0.637213	0.311663
GSM2235996	0.49576	0.542251	0.442945	0.757371	0.561555	0.915757	0.726712	0.442484	0.620748	0.568556	0.662731	0.651298	0.629141	0.587394	0.562941	0.640431	0.6445	0.591645	0.692567	0.64286	0.657366	0.752113	0.458834
GSM2235997	0.623462	0.671935	0.520391	0.783307	0.236417	0.94838	0.587278	0.553522	0.728805	0.594156	0.61877	0.630866	0.62214	0.655632	0.55843	0.638943	0.54235	0.566638	0.657429	0.71507	0.705127	0.651721	0.426591
GSM2235998	0.630447	0.579549	0.645571	0.775471	0.236611	0.892404	0.560509	0.598586	0.778065	0.637319	0.62754	0.622822	0.617279	0.651463	0.602924	0.62664	0.551247	0.529527	0.592238	0.708258	0.713159	0.661984	0.329271
GSM2235999	0.580422	0.588044	0.548622	0.752904	0.378891	0.928921	0.545544	0.622159	0.803654	0.667639	0.62938	0.619745	0.617721	0.670009	0.564532	0.625461	0.574192	0.545424	0.637096	0.714689	0.733042	0.61892	0.318132
GSM2236000	0.567995	0.563777	0.648893	0.799567	0.35546	0.882775	0.404614	0.516303	0.679928	0.541466	0.598828	0.611194	0.622353	0.589068	0.558357	0.604867	0.544299	0.520496	0.580059	0.676491	0.658195	0.507493	0.345679
GSM2236001	0.683411	0.506668	0.657972	0.689222	0.601219	0.898078	0.533136	0.503039	0.710281	0.585699	0.624058	0.637402	0.60832	0.59509	0.589022	0.609445	0.563814	0.535316	0.620723	0.678686	0.677673	0.569053	0.356439
GSM2236002	0.558476	0.456333	0.601767	0.726404	0.248456	0.895221	0.395508	0.686901	0.836684	0.665236	0.608406	0.622313	0.61667	0.62547	0.572697	0.552594	0.498719	0.493302	0.555258	0.674061	0.711103	0.442248	0.229254
GSM2236003	0.439185	0.594226	0.701959	0.864215	0.518706	0.868673	0.307477	0.427524	0.642062	0.551652	0.644213	0.600663	0.617899	0.613222	0.583445	0.629338	0.58716	0.496698	0.570428	0.690058	0.674885	0.323851	0.228467
GSM2236004	0.548891	0.507152	0.584069	0.722684	0.344946	0.93005	0.529181	0.532617	0.72864	0.582716	0.615905	0.625841	0.614746	0.600833	0.555698	0.570559	0.534365	0.533405	0.589655	0.686929	0.687342	0.63603	0.319752
GSM2236005	0.635098	0.602767	0.649374	0.783025	0.379364	0.950939	0.497163	0.56578	0.736179	0.600885	0.631263	0.616981	0.630445	0.633995	0.546502	0.625141	0.547935	0.530806	0.589661	0.718471	0.714426	0.578576	0.302724
GSM2236006	0.52913	0.414966	0.652512	0.803329	0.42722	0.914865	0.490439	0.554096	0.782641	0.664704	0.652018	0.615246	0.632144	0.621474	0.586464	0.593589	0.564696	0.531482	0.587681	0.680698	0.719764	0.540116	0.315716
GSM2236007	0.710805	0.641267	0.625311	0.828082	0.465677	0.979054	0.725622	0.641313	0.753523	0.626783	0.648554	0.616995	0.615676	0.633758	0.584937	0.675183	0.565169	0.599365	0.690289	0.71216	0.720212	0.825339	0.502393
GSM2236008	0.606674	0.654607	0.595236	0.850081	0.61367	0.91726	0.700011	0.379467	0.63485	0.560629	0.670913	0.646541	0.619737	0.599116	0.61091	0.646697	0.638073	0.54373	0.619421	0.681255	0.683139	0.754453	0.391785
GSM2236009	0.571322	0.534431	0.627832	0.801418	0.517494	0.915307	0.515033	0.541817	0.750908	0.625925	0.636242	0.619131	0.626019	0.623867	0.56316	0.617619	0.567696	0.545875	0.608037	0.705414	0.705673	0.585122	0.353885
GSM2236010	0.56093	0.425303	0.59008	0.700071	0.379046	0.922222	0.445071	0.616924	0.771661	0.633306	0.608446	0.619987	0.615055	0.609135	0.556803	0.530612	0.528576	0.522946	0.592905	0.669394	0.691708	0.48997	0.276932
GSM2236011	0.617188	0.515589	0.64259	0.803969	0.46179	0.95427	0.708701	0.53213	0.783919	0.628622	0.652326	0.618172	0.613465	0.630979	0.575989	0.587645	0.571429	0.531136	0.603118	0.687731	0.720811	0.778535	0.392406
GSM2236012	0.654729	0.470003	0.656789	0.743198	0.526388	0.944105	0.534565	0.693573	0.800031	0.659351	0.65064	0.617607	0.579815	0.619643	0.570275	0.605001	0.551951	0.538821	0.614705	0.675015	0.716971	0.601109	0.294819
GSM2236013	0.706159	0.610262	0.663328	0.713964	0.525708	0.902028	0.601958	0.653541	0.801009	0.663827	0.649077	0.634043	0.579791	0.625936	0.577462	0.5833	0.545453	0.580624	0.66973	0.674517	0.719008	0.678901	0.419934
GSM2236014	0.560076	0.329438	0.599594	0.653683	0.230996	0.946498	0.775468	0.720341	0.844904	0.677142	0.612231	0.638953	0.591566	0.669299	0.549755	0.5441	0.511674	0.537483	0.625505	0.688141	0.747973	0.830012	0.388661
GSM2236015	0.630191	0.583597	0.589484	0.839596	0.45974	0.871903	0.501486	0.54523	0.689149	0.600984	0.668926	0.631207	0.587661	0.617515	0.592312	0.619848	0.590354	0.520198	0.598523	0.710028	0.701285	0.554253	0.269419
GSM2236016	0.596183	0.427382	0.683795	0.693562	0.209427	0.927918	0.554559	0.704708	0.822008	0.686998	0.649536	0.61692	0.59394	0.638311	0.56682	0.570977	0.539088	0.523251	0.610342	0.697529	0.744178	0.630419	0.287733
GSM2236017	0.55753	0.55856	0.621553	0.796704	0.508728	0.886727	0.514998	0.456764	0.66044	0.584283	0.653001	0.633067	0.596131	0.620552	0.572415	0.57944	0.601129	0.524351	0.585019	0.709853	0.694682	0.519166	0.202771
GSM2236018	0.566958	0.524235	0.651461	0.72322	0.471452	0.890771	0.613712	0.561282	0.723869	0.610261	0.638871	0.650578	0.566282	0.637613	0.59889	0.578725	0.556974	0.546861	0.611773	0.6936	0.703918	0.613377	0.235941
GSM2236019	0.679897	0.534163	0.704556	0.743659	0.26643	0.920666	0.539046	0.678947	0.836102	0.665916	0.631819	0.626496	0.59787	0.658433	0.575299	0.579883	0.52916	0.524807	0.60667	0.709904	0.766341	0.584826	0.2453
GSM2236020	0.62407	0.550571	0.694489	0.729113	0.31163	0.972092	0.660601	0.739465	0.839675	0.707517	0.640278	0.611911	0.578733	0.666852	0.574007	0.564327	0.545274	0.569167	0.637026	0.710668	0.764812	0.733707	0.340822
GSM2236021	0.705532	0.719758	0.685056	0.86809	0.748951	0.86995	0.590412	0.505723	0.685623	0.607232	0.677558	0.643666	0.610366	0.596985	0.622616	0.645673	0.59903	0.537054	0.614478	0.70584	0.687238	0.645335	0.276617
GSM2236022	0.528347	0.521478	0.62048	0.69104	0.21303	0.909728	0.505374	0.611688	0.759327	0.651748	0.627502	0.624626	0.596896	0.635749	0.561235	0.552042	0.548188	0.536203	0.621736	0.718448	0.74319	0.529015	0.348471
GSM2236023	0.580252	0.418557	0.60926	0.678088	0.303264	0.951059	0.711382	0.682195	0.828337	0.666569	0.612292	0.617225	0.572049	0.652369	0.544074	0.539361	0.524987	0.598465	0.653663	0.6944	0.739034	0.797421	0.471543
GSM2236024	0.553406	0.477196	0.580648	0.755996	0.335239	0.935954	0.639163	0.523929	0.711645	0.597739	0.612453	0.641897	0.59945	0.658618	0.546572	0.569597	0.541017	0.568635	0.62504	0.711655	0.720217	0.697908	0.360778
GSM2236025	0.648018	0.604227	0.610922	0.795329	0.655308	0.900727	0.578756	0.442542	0.661379	0.55701	0.653483	0.654615	0.620695	0.629345	0.61083	0.62125	0.58253	0.561222	0.616412	0.696997	0.6798	0.660504	0.416138
GSM2236026	0.701995	0.600931	0.511102	0.84513	0.633626	0.879249	0.549238	0.428541	0.644252	0.572355	0.694757	0.668219	0.615024	0.573477	0.617441	0.656124	0.6422	0.521154	0.58277	0.641597	0.654884	0.543625	0.348324
GSM2236027	0.673494	0.56258	0.665958	0.843106	0.438651	0.881298	0.559965	0.52931	0.741504	0.633541	0.688697	0.630929	0.586378	0.61896	0.590988	0.652976	0.606077	0.52876	0.618918	0.685895	0.719973	0.562806	0.326189
GSM2236028	0.653397	0.473834	0.664553	0.729372	0.23505	0.961326	0.747709	0.713877	0.843241	0.706066	0.657949	0.608725	0.575606	0.659759	0.60228	0.56482	0.551005	0.58264	0.663908	0.689146	0.741372	0.816955	0.403247
GSM2236029	0.513596	0.383363	0.595609	0.715595	0.312692	0.940395	0.708522	0.646406	0.811695	0.666867	0.625972	0.622858	0.602147	0.667044	0.534172	0.495328	0.531876	0.561409	0.608782	0.683255	0.747182	0.804561	0.463427
GSM2236030	0.704566	0.578215	0.695229	0.784272	0.47115	0.84823	0.514259	0.666295	0.837496	0.694223	0.644784	0.622121	0.607478	0.662298	0.573941	0.607763	0.547557	0.542998	0.620764	0.697906	0.742639	0.615001	0.360263
GSM2236031	0.776435	0.614813	0.701911	0.80486	0.857168	0.905408	0.530587	0.478151	0.682377	0.591175	0.657248	0.645076	0.636637	0.602925	0.60754	0.619925	0.612596	0.553873	0.619355	0.708593	0.692685	0.602989	0.39161
GSM2236032	0.617696	0.536298	0.660927	0.747366	0.38633	0.972621	0.760311	0.704621	0.845185	0.69952	0.634915	0.616273	0.60206	0.680075	0.571708	0.569561	0.545484	0.568169	0.63828	0.716332	0.775858	0.857465	0.442309
GSM2236033	0.56585	0.50143	0.582103	0.794356	0.378985	0.916448	0.37663	0.67795	0.815834	0.666551	0.624062	0.600824	0.620737	0.618481	0.546977	0.561464	0.524357	0.518121	0.580988	0.698701	0.730036	0.417488	0.304069
GSM2236034	0.648565	0.52233	0.642124	0.726074	0.363178	0.963895	0.775793	0.543817	0.756564	0.60225	0.639244	0.631439	0.620046	0.68912	0.563226	0.597367	0.549379	0.592511	0.631006	0.705744	0.752959	0.879542	0.528731
GSM2236036	0.572599	0.417818	0.648691	0.688991	0.354205	0.884488	0.45722	0.636458	0.816858	0.674143	0.62257	0.599371	0.57853	0.619664	0.543777	0.499186	0.51204	0.51064	0.588547	0.684713	0.70744	0.538556	0.248531
GSM2236037	0.7681	0.612832	0.621616	0.846626	0.457292	0.894523	0.506018	0.483611	0.642982	0.578678	0.659796	0.620521	0.615999	0.642797	0.586682	0.667282	0.608113	0.55039	0.593184	0.711822	0.724065	0.569794	0.344911
GSM2236038	0.67361	0.618529	0.66045	0.77246	0.514233	0.876692	0.6337	0.539365	0.719919	0.599549	0.629704	0.611832	0.600572	0.615888	0.583417	0.602805	0.561868	0.552789	0.586757	0.688934	0.696419	0.705213	0.362827
GSM2236039	0.768886	0.568972	0.723396	0.741741	0.519108	0.856419	0.448745	0.640917	0.813369	0.65291	0.614178	0.607595	0.595195	0.618576	0.598053	0.573233	0.496401	0.50516	0.588595	0.696203	0.734428	0.517313	0.352682
GSM2236040	0.577074	0.382925	0.648767	0.655416	0.250963	0.957372	0.604987	0.658733	0.825705	0.680596	0.61232	0.608067	0.601257	0.653208	0.540666	0.531498	0.499836	0.538174	0.612845	0.701086	0.75732	0.645578	0.300727
GSM2236041	0.757387	0.566059	0.692061	0.762856	0.640129	0.902429	0.668102	0.5312	0.687643	0.595032	0.652183	0.630793	0.617666	0.619271	0.585303	0.614565	0.577757	0.568291	0.643862	0.702733	0.704659	0.757062	0.426828
GSM2236042	0.559699	0.414854	0.593974	0.736744	0.407414	0.91823	0.5825	0.624265	0.774986	0.635696	0.649341	0.635673	0.615555	0.636034	0.57106	0.534023	0.538077	0.528796	0.572467	0.69647	0.730865	0.657002	0.35781
GSM2236043	0.710303	0.559858	0.687896	0.76368	0.643467	0.92545	0.576866	0.615852	0.764092	0.632703	0.632287	0.61232	0.602465	0.619596	0.577666	0.590533	0.542348	0.550897	0.641914	0.697643	0.711947	0.672237	0.394941
GSM2236044	0.563466	0.475335	0.568289	0.777329	0.236611	0.894299	0.344978	0.643957	0.814362	0.634383	0.619007	0.614645	0.611776	0.623965	0.580914	0.558916	0.532823	0.510297	0.585375	0.686079	0.742176	0.386432	0.267767
GSM2236045	0.586101	0.420498	0.585282	0.717441	0.316102	0.966003	0.763466	0.633084	0.84018	0.708813	0.666976	0.60357	0.598685	0.651826	0.584519	0.582617	0.587458	0.550372	0.629802	0.677574	0.757017	0.80964	0.362389
GSM2236046	0.570068	0.468904	0.59625	0.692543	0.394377	0.918803	0.460311	0.611469	0.797867	0.654414	0.624267	0.603438	0.605369	0.637972	0.572381	0.564371	0.533461	0.527959	0.5963	0.694372	0.702808	0.506347	0.296731
GSM2236047	0.565553	0.565275	0.629854	0.74401	0.508788	0.886757	0.4361	0.514624	0.701582	0.58596	0.654645	0.659414	0.611494	0.594119	0.613862	0.576254	0.565504	0.5609	0.61487	0.664127	0.647746	0.484944	0.464225
GSM2236048	0.563086	0.201615	0.620591	0.496577	0.104391	0.976604	0.66439	0.697699	0.890437	0.700601	0.611154	0.61068	0.541039	0.65509	0.521839	0.403344	0.490312	0.554047	0.634263	0.648429	0.733137	0.74125	0.354843
GSM2236049	0.531815	0.535872	0.472055	0.727522	0.487207	0.918951	0.531291	0.653354	0.824295	0.678412	0.657201	0.6553	0.604031	0.619432	0.600184	0.540301	0.571805	0.559234	0.597453	0.675839	0.675465	0.582368	0.498304
GSM2236050	0.583353	0.392594	0.678256	0.719009	0.412054	0.909969	0.394234	0.563145	0.740235	0.604731	0.614727	0.639066	0.626185	0.610374	0.595717	0.547964	0.510863	0.509838	0.583944	0.651519	0.69224	0.413097	0.271655
GSM2236051	0.687101	0.566781	0.645843	0.81719	0.654646	0.880206	0.529923	0.441587	0.689184	0.571868	0.661525	0.655828	0.599397	0.593325	0.631011	0.616633	0.59292	0.511866	0.592634	0.688784	0.666615	0.509197	0.250137
GSM2236052	0.609022	0.511054	0.672765	0.728672	0.346727	0.886937	0.443775	0.673563	0.853326	0.685819	0.620071	0.616075	0.580646	0.605072	0.569864	0.55142	0.501605	0.511129	0.614036	0.671817	0.693612	0.494878	0.266946
GSM2236053	0.636228	0.621076	0.452563	0.819832	0.464532	0.875886	0.357815	0.497159	0.706771	0.587797	0.660072	0.653222	0.58558	0.588815	0.603324	0.627004	0.565031	0.513648	0.55912	0.667741	0.665905	0.373948	0.310739
GSM2236054	0.699897	0.690677	0.396264	0.836362	0.692321	0.883084	0.393523	0.54712	0.719094	0.592089	0.646937	0.630122	0.624527	0.593719	0.591603	0.653619	0.57364	0.547589	0.601533	0.687529	0.668425	0.423742	0.392759
GSM2236055	0.63969	0.460783	0.498829	0.692384	0.295207	0.871319	0.45098	0.694612	0.787887	0.664612	0.641415	0.620609	0.568624	0.650829	0.557014	0.548354	0.504151	0.506886	0.576492	0.695629	0.738758	0.4864	0.269507
GSM2236056	0.575023	0.434716	0.615368	0.679693	0.459248	0.916237	0.462191	0.541429	0.707091	0.595743	0.617596	0.619638	0.580423	0.618523	0.558786	0.539018	0.537264	0.521301	0.598626	0.674242	0.702513	0.46279	0.214276
GSM2236057	0.67006	0.547521	0.64304	0.771764	0.700466	0.884609	0.604492	0.547311	0.728276	0.611809	0.635889	0.642214	0.600569	0.59371	0.591241	0.591148	0.577495	0.553107	0.645353	0.686602	0.69403	0.709123	0.406161
GSM2236058	0.592679	0.649885	0.586744	0.808018	0.507826	0.90142	0.5172	0.621663	0.784233	0.651312	0.643608	0.612638	0.59138	0.59954	0.586309	0.60193	0.579408	0.547614	0.613972	0.688686	0.702556	0.59124	0.310405
GSM2236059	0.737235	0.700861	0.680389	0.793083	0.643206	0.894825	0.479828	0.535339	0.70837	0.600082	0.646522	0.627077	0.620493	0.611167	0.583757	0.657533	0.564467	0.551119	0.658817	0.691408	0.685746	0.528718	0.323833
GSM2236060	0.849514	0.792907	0.691489	0.82407	0.73514	0.907782	0.693542	0.59913	0.74074	0.636648	0.655345	0.647984	0.610353	0.61636	0.579131	0.655086	0.58152	0.59041	0.722537	0.731023	0.726417	0.770016	0.477914
GSM2236061	0.805196	0.643993	0.710363	0.74318	0.656433	0.917773	0.737945	0.582628	0.735275	0.633268	0.646652	0.631981	0.598715	0.635398	0.572252	0.606639	0.560412	0.604407	0.668232	0.712368	0.74033	0.832201	0.517713
GSM2236062	0.748747	0.622968	0.692497	0.750173	0.458486	0.921922	0.616635	0.68748	0.832315	0.680439	0.631247	0.618189	0.57808	0.68871	0.578786	0.598507	0.557028	0.590173	0.67549	0.722147	0.7634	0.721642	0.408075
GSM2236063	0.82019	0.694457	0.729123	0.76381	0.488979	0.899684	0.527859	0.666892	0.778914	0.656111	0.63539	0.639492	0.587757	0.606675	0.592504	0.618476	0.555331	0.548028	0.653453	0.701113	0.707456	0.589568	0.336065
GSM2236064	0.682355	0.581576	0.667772	0.740834	0.289077	0.915278	0.604969	0.702478	0.823255	0.680176	0.633127	0.615561	0.585147	0.627936	0.548381	0.578125	0.53333	0.549088	0.638048	0.679867	0.725916	0.666833	0.358072
GSM2236065	0.566915	0.489644	0.62876	0.790003	0.376474	0.859129	0.525044	0.570694	0.78811	0.64271	0.645807	0.625689	0.585854	0.632401	0.573585	0.58196	0.55026	0.523248	0.560531	0.695527	0.719054	0.58317	0.293549
GSM2236066	0.442226	0.429622	0.525452	0.853002	0.514445	0.875063	0.485483	0.482539	0.717906	0.588535	0.675731	0.636486	0.58376	0.570387	0.588785	0.601764	0.61286	0.502343	0.579154	0.648137	0.641734	0.424612	0.221149
GSM2236067	0.672474	0.486788	0.666689	0.793647	0.477035	0.907383	0.713697	0.602187	0.77086	0.654059	0.657882	0.633393	0.57662	0.648904	0.579929	0.604757	0.579254	0.576594	0.632228	0.684567	0.768343	0.750591	0.340028
GSM2236068	0.671685	0.70215	0.58002	0.85937	0.789794	0.850573	0.523534	0.347308	0.608446	0.573491	0.696817	0.649258	0.60558	0.610499	0.6144	0.62564	0.641687	0.521133	0.562391	0.722635	0.700661	0.56962	0.227288
GSM2236069	0.450666	0.307674	0.540315	0.654366	0.0150088	0.863733	0.430117	0.566627	0.760665	0.620596	0.637163	0.6081	0.586321	0.626161	0.539196	0.494974	0.525677	0.504422	0.566313	0.679212	0.692551	0.428931	0.200189
GSM2236070	0.625303	0.453591	0.693232	0.637612	0.28721	0.983437	0.91832	0.586242	0.785707	0.639439	0.64013	0.630187	0.579062	0.706208	0.560593	0.564796	0.554356	0.586047	0.643076	0.706239	0.786126	0.969264	0.524465
GSM2236071	0.618672	0.400224	0.690913	0.667224	0.360039	0.960571	0.834076	0.698737	0.83802	0.701591	0.638892	0.612674	0.591298	0.685676	0.561753	0.504668	0.550949	0.583628	0.637974	0.701548	0.785379	0.909406	0.485634
GSM2236072	0.755591	0.620816	0.659994	0.803971	0.404564	0.933281	0.823615	0.640233	0.832141	0.690527	0.653656	0.618962	0.572662	0.672681	0.58923	0.614282	0.562936	0.58428	0.618135	0.699636	0.759798	0.892384	0.452973
GSM2236073	0.568535	0.542028	0.589985	0.789638	0.533454	0.881347	0.483946	0.580553	0.769629	0.63062	0.620501	0.627463	0.613619	0.611139	0.581389	0.546844	0.544555	0.539592	0.621386	0.676397	0.679154	0.549681	0.274784
GSM2236074	0.634141	0.420406	0.620012	0.653383	0.419733	0.938394	0.590086	0.693847	0.847786	0.678826	0.600956	0.659624	0.578106	0.64443	0.612285	0.558294	0.516471	0.54771	0.600877	0.671557	0.73817	0.686065	0.430942
GSM2236075	0.693619	0.663696	0.660087	0.809513	0.675135	0.908948	0.612311	0.571437	0.741075	0.632032	0.659566	0.652644	0.605582	0.616187	0.611381	0.644172	0.57989	0.546508	0.652759	0.696664	0.687781	0.677026	0.367479
GSM2236076	0.580527	0.49195	0.593212	0.757589	0.187668	0.922931	0.817862	0.600698	0.775643	0.622004	0.605766	0.621874	0.587673	0.690676	0.57049	0.564707	0.526421	0.595173	0.619077	0.692376	0.723769	0.907267	0.606072
GSM2236077	0.625655	0.483143	0.643718	0.650021	0.178403	0.960959	0.737552	0.681747	0.822136	0.675371	0.625247	0.627429	0.564709	0.644835	0.555917	0.515891	0.513499	0.568352	0.622822	0.689679	0.725029	0.830231	0.441006
GSM2236078	0.566981	0.422471	0.670076	0.738786	0.366685	0.883567	0.206088	0.690385	0.810514	0.684665	0.617986	0.620203	0.57158	0.663085	0.562625	0.558594	0.520807	0.50145	0.556916	0.688294	0.722363	0.227467	0.253048
GSM2236079	0.617524	0.473607	0.652156	0.651968	0.326305	0.968466	0.761298	0.662874	0.796535	0.636862	0.618159	0.629935	0.599138	0.634097	0.559792	0.56692	0.516815	0.577961	0.636486	0.67698	0.715225	0.857776	0.506931
GSM2236080	0.677728	0.660254	0.656832	0.799204	0.479847	0.957546	0.675649	0.643806	0.786218	0.649423	0.644958	0.650765	0.588588	0.631264	0.58269	0.618241	0.558447	0.588351	0.72101	0.680081	0.72286	0.738931	0.436903
GSM2236082	0.608004	0.47191	0.669908	0.708271	0.473757	0.883805	0.547725	0.609364	0.727149	0.622368	0.6166	0.639542	0.585412	0.669282	0.574301	0.515696	0.531802	0.530819	0.605309	0.700546	0.685937	0.621025	0.336035
GSM2236083	0.670832	0.475396	0.731384	0.667245	0.486698	0.868479	0.523754	0.451547	0.600509	0.546353	0.6089	0.639158	0.561778	0.654245	0.577003	0.502276	0.526369	0.506828	0.570383	0.670864	0.677918	0.598937	0.226053
GSM2236084	0.629554	0.569943	0.602291	0.677472	0.48237	0.886087	0.586879	0.693562	0.81966	0.67283	0.634904	0.614415	0.598519	0.618976	0.574689	0.56315	0.511358	0.551388	0.645336	0.678172	0.694241	0.638453	0.327217
GSM2236085	0.675252	0.55743	0.655075	0.725708	0.450643	0.943845	0.812917	0.697936	0.831957	0.674373	0.620754	0.61316	0.587901	0.670039	0.575605	0.55535	0.514642	0.582276	0.659787	0.678705	0.750353	0.906288	0.409489
GSM2236086	0.630182	0.593123	0.620525	0.747071	0.549235	0.959811	0.830225	0.667332	0.794353	0.670909	0.637515	0.607834	0.593886	0.662913	0.586743	0.56037	0.52663	0.621413	0.657588	0.6751	0.720087	0.926499	0.581241
GSM2236087	0.756144	0.653578	0.741014	0.752969	0.415017	0.904618	0.67098	0.689502	0.816177	0.667554	0.644	0.616903	0.603553	0.644633	0.587793	0.592801	0.513565	0.57412	0.653611	0.671106	0.718058	0.770215	0.444268
GSM2236088	0.622036	0.665445	0.599446	0.775623	0.4551	0.917288	0.514673	0.677766	0.80436	0.668726	0.632045	0.609672	0.590902	0.643153	0.581576	0.589119	0.501892	0.562686	0.65611	0.668062	0.686447	0.584683	0.311805
GSM2236089	0.67096	0.621456	0.63605	0.747652	0.617903	0.928213	0.795186	0.683646	0.820811	0.682381	0.637472	0.612416	0.588191	0.655622	0.597192	0.562165	0.506385	0.588688	0.65732	0.652399	0.726598	0.877203	0.428239
GSM2236090	0.617914	0.58922	0.580883	0.779778	0.606929	0.922127	0.639025	0.630498	0.770494	0.64451	0.646119	0.610637	0.583663	0.634642	0.596003	0.579634	0.534535	0.583494	0.643875	0.68708	0.702743	0.733301	0.394375
GSM2236091	0.649874	0.562243	0.618107	0.787832	0.53461	0.911896	0.634266	0.656318	0.803533	0.662617	0.636934	0.612022	0.595166	0.633097	0.598003	0.585574	0.524191	0.558169	0.641089	0.665754	0.695833	0.724329	0.318549
GSM2236092	0.595335	0.577739	0.573512	0.761317	0.469887	0.925458	0.652709	0.694567	0.811671	0.670311	0.632983	0.601953	0.59431	0.629229	0.598404	0.565375	0.525087	0.567971	0.625354	0.676373	0.709838	0.751943	0.34489
GSM2236093	0.601003	0.535361	0.576922	0.764793	0.440542	0.913623	0.663294	0.670129	0.791333	0.650161	0.619893	0.61705	0.602315	0.639621	0.593898	0.571005	0.512061	0.551479	0.620719	0.674105	0.710473	0.744794	0.32234
GSM2236094	0.612353	0.551749	0.614689	0.766344	0.457049	0.935004	0.668487	0.669674	0.80922	0.656411	0.627099	0.615377	0.593152	0.617439	0.596174	0.576535	0.502302	0.552122	0.628522	0.645345	0.683445	0.764567	0.356234
GSM2236095	0.607039	0.540551	0.579758	0.774505	0.437288	0.911296	0.659478	0.655452	0.789611	0.653927	0.649166	0.611656	0.589715	0.657458	0.591128	0.575934	0.52785	0.55635	0.631086	0.680302	0.711431	0.741226	0.315781
