# Supplementary material for: Cross-talk of RNA modification "writers" describes tumor stemness and microenvironment and guides personalized immunotherapy for gastric cancer
Source: Aging (Albany NY). 2023 Jun 14;15(12):5445–81. doi: 10.18632/aging.204802 (PMC10333070; doi:10.18632/aging.204802)
Supplement: Supplementary Table 13 [file aging-15-204802-s014.xlsx]

## Sheet: Sheet1
Supplementary Table 13. The differentially expressed genes between distinct RNA modification patterns.
WM_Cluster D vs WM_Cluster A								WM_Cluster D vs WM_Cluster B								WM_Cluster D vs WM_Cluster C
Gene	logFC	AveExpr	t	P.Value	adj.P.Val	B		Gene	logFC	AveExpr	t	P.Value	adj.P.Val	B		Gene	logFC	AveExpr	t	P.Value	adj.P.Val	B
CFI	0.636688	6.46004	13.8905	2.12e-40	3.18e-36	80.5558		CSTF2	0.670864	6.90382	17.1117	4.26e-58	6.38e-54	121.253		CFI	1.29768	6.46004	25.4371	1.27e-111	1.91e-107	242.724
PCNA	0.566082	8.45256	11.8425	1.84e-30	1.38e-26	58.1624		PCNA	0.817866	8.45256	16.887	8.6e-57	6.45e-53	118.277		NUDT21	0.658034	7.06131	17.7078	1.31e-61	9.85e-58	129.063
TRMT6	0.457122	6.1975	11.6813	9.97e-30	4.98e-26	56.5126		ATAD2	0.96101	6.76066	15.9786	1.29e-51	6.45e-48	106.478		ATF1	0.567187	6.29603	15.3733	2.92e-48	1.46e-44	98.7302
CSTF2	0.444373	6.90382	11.4841	7.66e-29	2.87e-25	54.5183		SPC25	1.03656	5.75856	15.8951	3.79e-51	1.42e-47	105.412		HAT1	0.735505	7.5632	15.2249	1.88e-47	7.05e-44	96.8908
CSE1L	0.406715	8.28812	10.4602	1.98e-24	5.94e-21	44.5917		CSE1L	0.623336	8.28812	15.8227	9.6e-51	2.88e-47	104.492		CDV3	0.539265	7.66243	14.5828	5.25e-44	1.58e-40	89.0611
DSCC1	0.447627	5.78061	10.3949	3.69e-24	9.23e-21	43.9839		RFC3	0.770305	6.0985	15.6094	1.46e-49	3.66e-46	101.795		PDCD10	0.560594	8.00161	14.1526	9.44e-42	2.36e-38	83.9399
GINS1	0.608174	6.09093	10.3316	6.74e-24	1.44e-20	43.3975		TIPIN	0.685882	6.00174	15.4483	1.13e-48	2.42e-45	99.7728		PTGES3	0.6148	9.49633	13.4256	4.8e-38	1.03e-34	75.5251
RFC3	0.499698	6.0985	10.2595	1.33e-23	2.49e-20	42.7324		CHEK1	0.848025	6.2059	15.3682	3.11e-48	5.82e-45	98.7722		CYB5R4	0.533064	6.21781	13.1834	7.68e-37	1.32e-33	72.7907
NUF2	0.67824	5.89865	10.0841	6.86e-23	1.14e-19	41.1328		MCM10	0.942115	5.80523	15.2764	9.85e-48	1.64e-44	97.6299		C6orf211	0.519982	6.83354	13.1803	7.95e-37	1.32e-33	72.7565
CHORDC1	0.384036	6.17025	10.0338	1.09e-22	1.64e-19	40.678		PLK4	0.824385	6.00579	15.2401	1.55e-47	2.33e-44	97.1789		BRD3	-0.532075	7.2812	-13.1303	1.4e-36	2.1e-33	72.1964
EXOSC8	0.379737	7.83628	9.88027	4.48e-22	6.11e-19	39.3015		HSPD1	0.457338	8.60314	15.1467	5e-47	6.81e-44	96.0231		SCYL2	0.453184	7.51037	13.0817	2.44e-36	3.32e-33	71.653
TIPIN	0.431257	6.00174	9.8415	6.38e-22	7.97e-19	38.9567		UBE2T	0.991908	7.23088	14.9521	5.63e-46	7.03e-43	93.6276		KIF2A	0.613416	6.56969	13.0105	5.44e-36	6.8e-33	70.8604
CKAP2	0.447333	6.17694	9.80307	9.05e-22	1.03e-18	38.6161		MAD2L1	1.03969	6.84255	14.9254	7.83e-46	9.02e-43	93.3013		RBM7	0.565929	6.81956	12.8512	3.25e-35	3.66e-32	69.099
CENPH	0.423438	5.49139	9.79634	9.62e-22	1.03e-18	38.5565		TRMT6	0.590289	6.1975	14.8878	1.25e-45	1.33e-42	92.8412		AKT1	-0.431495	7.8779	-12.8468	3.42e-35	3.66e-32	69.0499
NUFIP1	0.280537	5.57421	9.75533	1.39e-21	1.39e-18	38.1944		RAD51AP1	0.981986	7.33076	14.8033	3.53e-45	3.53e-42	91.8101		TWF1	0.503154	6.02401	12.8086	5.23e-35	5.23e-32	68.6301
BUB1	0.590081	5.86305	9.71718	1.97e-21	1.84e-18	37.8587		CENPN	0.836908	6.65841	14.781	4.65e-45	4.35e-42	91.5391		TMED2	0.53846	8.7964	12.7005	1.74e-34	1.63e-31	67.4456
KIF18A	0.51975	5.41412	9.66082	3.26e-21	2.88e-18	37.3648		SNRPB	0.608873	9.20497	14.7167	1.02e-44	9.02e-42	90.7584		ANKS3	-0.461371	5.32478	-12.5261	1.19e-33	1.05e-30	65.5515
FANCB	0.365482	4.46757	9.43342	2.46e-20	2.05e-17	35.3962		VRK1	0.657619	6.88181	14.7059	1.17e-44	9.72e-42	90.6273		UTP18	0.504301	6.66896	12.5175	1.31e-33	1.09e-30	65.4591
ZBTB20	-0.542026	6.82308	-9.40234	3.23e-20	2.44e-17	35.1303		DSCC1	0.638916	5.78061	14.6439	2.49e-44	1.91e-41	89.8769		FAM96A	0.495855	8.86016	12.4109	4.19e-33	3.31e-30	64.3104
RPAP3	0.305814	6.47383	9.40083	3.27e-20	2.44e-17	35.1173		EXO1	0.908147	5.70269	14.642	2.55e-44	1.91e-41	89.8537		LAP3	0.753324	8.59762	12.401	4.66e-33	3.34e-30	64.2044
HSPD1	0.280004	8.60314	9.39591	3.42e-20	2.44e-17	35.0753		DEPDC1B	1.00419	6.14425	14.5179	1.16e-43	8.26e-41	88.3583		ARFIP1	0.452314	6.83344	12.3979	4.83e-33	3.34e-30	64.171
MAD2L1	0.643535	6.84255	9.36027	4.67e-20	3.18e-17	34.7714		KIF18A	0.791094	5.41412	14.5129	1.23e-43	8.38e-41	88.2979		PLEKHF2	0.500455	6.58082	12.3965	4.9e-33	3.34e-30	64.1566
PLK4	0.499457	6.00579	9.35511	4.88e-20	3.18e-17	34.7275		HELLS	0.725548	5.6574	14.4481	2.7e-43	1.76e-40	87.5206		MITD1	0.438338	7.63749	12.2897	1.56e-32	1.02e-29	63.0148
CCNB1	0.643907	6.83184	9.33301	5.92e-20	3.7e-17	34.5396		PRIM1	0.695433	6.62068	14.4203	3.78e-43	2.36e-40	87.188		WTAP	0.310078	6.68282	12.2276	3.05e-32	1.91e-29	62.3538
PANK2	0.239207	6.41819	9.28321	9.13e-20	5.47e-17	34.1176		NUF2	0.973804	5.89865	14.29	1.82e-42	1.09e-39	85.6336		PRPF18	0.439798	6.24001	12.1863	4.76e-32	2.86e-29	61.9156
KIF14	0.566635	6.23107	9.27873	9.49e-20	5.47e-17	34.0797		MND1	0.872763	5.76424	14.2751	2.18e-42	1.25e-39	85.4558		GNA11	-0.595042	7.96459	-12.1644	6.02e-32	3.47e-29	61.6841
SNRPB	0.377818	9.20497	9.25252	1.19e-19	6.61e-17	33.8585		CKAP2	0.659247	6.17694	14.2589	2.64e-42	1.47e-39	85.2637		RPAP3	0.440193	6.47383	12.158	6.45e-32	3.58e-29	61.6169
ATAD2	0.548019	6.76066	9.23207	1.42e-19	7.61e-17	33.6862		ZBTB20	-0.832589	6.82308	-14.2545	2.79e-42	1.49e-39	85.2118		MRPS18C	0.44855	6.79227	12.13	8.71e-32	4.53e-29	61.3207
PSPC1	0.271882	6.14311	9.21908	1.59e-19	8.22e-17	33.5769		ERCC6L	0.772926	5.42239	14.2484	3e-42	1.55e-39	85.1393		TRUB1	0.464059	5.19416	12.1295	8.75e-32	4.53e-29	61.3158
CHEK1	0.498835	6.2059	9.15934	2.66e-19	1.33e-16	33.0762		KIF14	0.880429	6.23107	14.2294	3.77e-42	1.88e-39	84.9135		CCNH	0.404336	7.20545	12.1062	1.12e-31	5.62e-29	61.0699
DEPDC1B	0.623928	6.14425	9.13941	3.15e-19	1.53e-16	32.9098		MCM2	0.882396	7.34986	14.2051	5.04e-42	2.44e-39	84.6258		HGS	-0.393838	7.49724	-12.0428	2.21e-31	1.07e-28	60.403
DIP2C	-0.460686	6.19894	-9.12703	3.51e-19	1.62e-16	32.8066		CCNE2	0.83165	5.76307	14.1582	8.83e-42	4.14e-39	84.0706		MAD2L1	0.919592	6.84255	12.0177	2.89e-31	1.35e-28	60.1407
CSTF1	0.270185	5.66518	9.12501	3.57e-19	1.62e-16	32.7897		CCNA2	0.975069	6.98699	14.1461	1.02e-41	4.64e-39	83.9274		NMI	0.658261	8.27389	11.965	5.06e-31	2.3e-28	59.5885
FANCI	0.541654	6.3261	9.1209	3.7e-19	1.63e-16	32.7555		RFC4	0.639386	7.60439	14.1101	1.57e-41	6.92e-39	83.5023		SYMPK	-0.51408	5.82092	-11.9524	5.78e-31	2.55e-28	59.4569
ASPM	0.636479	6.86551	9.11176	4e-19	1.68e-16	32.6794		C2orf47	0.466956	8.02356	14.0982	1.81e-41	7.74e-39	83.3629		COMMD8	0.546389	7.63525	11.8987	1.02e-30	4.37e-28	58.8977
GART	0.296565	6.33734	9.11006	4.05e-19	1.68e-16	32.6652		CENPI	0.513663	4.47786	14.0865	2.08e-41	8.65e-39	83.2251		MRPL42	0.442565	7.14505	11.8612	1.51e-30	6.3e-28	58.5086
VRK1	0.401955	6.88181	9.10728	4.15e-19	1.68e-16	32.6421		CENPL	0.644463	6.01003	14.068	2.59e-41	1.05e-38	83.0062		TBC1D13	-0.40987	6.28441	-11.8391	1.91e-30	7.74e-28	58.2795
FIGNL1	0.372914	6.13957	9.08069	5.21e-19	2.06e-16	32.4211		CENPH	0.615048	5.49139	14.044	3.45e-41	1.35e-38	82.724		NXT2	0.65613	6.45157	11.8157	2.44e-30	9.64e-28	58.0368
HELLS	0.449084	5.6574	9.06079	6.17e-19	2.37e-16	32.2562		MSH2	0.619782	6.01029	14.0424	3.51e-41	1.35e-38	82.7062		INPPL1	-0.57244	7.23383	-11.8124	2.53e-30	9.72e-28	58.0034
CENPI	0.325672	4.47786	9.04898	6.82e-19	2.56e-16	32.1584		CHORDC1	0.544465	6.17025	14.0401	3.61e-41	1.35e-38	82.679		AKAP8L	-0.477657	5.85362	-11.8056	2.72e-30	1.02e-27	57.9324
EXOSC3	0.333076	6.78276	9.00928	9.55e-19	3.49e-16	31.8306		FIGNL1	0.583651	6.13957	14.0272	4.21e-41	1.54e-38	82.5269		PSMA3	0.466547	7.44469	11.7755	3.72e-30	1.36e-27	57.622
NCAPH	0.576585	5.40824	8.92672	1.92e-18	6.71e-16	31.1528		DIAPH3	0.625298	5.38606	14.0158	4.81e-41	1.72e-38	82.3934		PLEKHM2	-0.44445	7.15585	-11.7597	4.4e-30	1.57e-27	57.4587
CASC5	0.359408	4.99252	8.92622	1.92e-18	6.71e-16	31.1488		NUDCD1	0.534987	6.03466	13.9948	6.17e-41	2.15e-38	82.1474		CNOT8	0.406435	6.95644	11.7124	7.21e-30	2.51e-27	56.9718
NEK2	0.649342	6.65843	8.89164	2.57e-18	8.76e-16	30.8664		CDT1	0.922051	6.23486	13.8947	2.02e-40	6.88e-38	80.9756		TMEM14B	0.528813	8.88637	11.7077	7.57e-30	2.58e-27	56.9235
TTK	0.668085	7.09591	8.86383	3.24e-18	1.08e-15	30.6401		BUB1	0.853891	5.86305	13.8783	2.45e-40	8.15e-38	80.7852		ANKRD13D	-0.372307	5.07433	-11.6776	1.04e-29	3.45e-27	56.6154
ABCE1	0.282157	7.83539	8.8366	4.07e-18	1.33e-15	30.419		TMPO	0.552297	6.20046	13.8426	3.73e-40	1.22e-37	80.3684		C11orf73	0.532587	6.80808	11.6749	1.06e-29	3.47e-27	56.5875
TRAIP	0.556576	4.7651	8.81667	4.81e-18	1.53e-15	30.2577		TTK	1.05608	7.09591	13.8291	4.37e-40	1.39e-37	80.2114		ATP6V1A	0.371104	8.45059	11.6536	1.33e-29	4.24e-27	56.3694
TRIM8	-0.274237	7.62524	-8.80361	5.36e-18	1.67e-15	30.152		SGOL2	0.664124	5.96094	13.8117	5.37e-40	1.68e-37	80.009		TANK	0.333075	6.45738	11.639	1.55e-29	4.83e-27	56.2197
UBE2T	0.575865	7.23088	8.79515	5.75e-18	1.76e-15	30.0837		LYAR	0.509905	7.06689	13.8024	5.98e-40	1.83e-37	79.901		ASCC3	0.425635	6.47029	11.6283	1.73e-29	5.29e-27	56.1101
SPC25	0.565583	5.75856	8.78736	6.13e-18	1.84e-15	30.0209		CCDC138	0.588926	5.2423	13.7981	6.29e-40	1.89e-37	79.8513		C12orf5	0.578557	6.75249	11.5955	2.43e-29	7.29e-27	55.7752
DTL	0.489223	6.34734	8.7666	7.28e-18	2.14e-15	29.8535		NEK2	1.01845	6.65843	13.7643	9.35e-40	2.75e-37	79.4599		EEF1E1	0.52358	6.97566	11.5683	3.22e-29	9.46e-27	55.4989
SNX5	0.292711	7.20768	8.73943	9.11e-18	2.63e-15	29.6351		STIL	0.836699	7.34568	13.7617	9.64e-40	2.75e-37	79.429		DPM1	0.513857	9.02104	11.55	3.89e-29	1.12e-26	55.3122
KLF9	-0.488666	7.34419	-8.72544	1.02e-17	2.89e-15	29.5228		AURKA	0.9878	7.30314	13.761	9.72e-40	2.75e-37	79.4215		SNAP23	0.431942	6.83214	11.5463	4.04e-29	1.14e-26	55.2749
PSMA3	0.309505	7.44469	8.69444	1.32e-17	3.66e-15	29.2746		WDR12	0.521296	6.91635	13.7482	1.13e-39	3.14e-37	79.2725		PACS2	-0.337952	6.21877	-11.5433	4.17e-29	1.16e-26	55.2443
TOP1	0.279841	6.97045	8.69209	1.35e-17	3.67e-15	29.2558		CDC25C	0.684285	5.10668	13.7175	1.62e-39	4.41e-37	78.9171		LSM6	0.531132	6.71316	11.524	5.09e-29	1.39e-26	55.048
QTRTD1	0.256152	5.25767	8.68743	1.4e-17	3.74e-15	29.2186		PTPRM	-0.758992	6.73841	-13.6938	2.13e-39	5.71e-37	78.6437		NEDD1	0.363218	6.05633	11.5112	5.8e-29	1.55e-26	54.9189
MND1	0.522575	5.76424	8.66012	1.75e-17	4.6e-15	29.0007		RAD54B	0.707785	5.70313	13.6872	2.31e-39	6.07e-37	78.567		SNX7	0.545339	7.26049	11.5058	6.14e-29	1.61e-26	54.8635
RACGAP1	0.407344	7.48245	8.65564	1.81e-17	4.69e-15	28.965		FBXO5	0.621356	6.34788	13.6782	2.56e-39	6.62e-37	78.4634		PIP5K1C	-0.565388	6.83508	-11.4821	7.82e-29	2.02e-26	54.624
EXO1	0.529286	5.70269	8.64625	1.96e-17	4.98e-15	28.8903		DTL	0.769131	6.34734	13.6029	6.16e-39	1.55e-36	77.5961		CHD8	-0.525387	7.43262	-11.4725	8.64e-29	2.2e-26	54.5266
NCAPG	0.605455	6.8265	8.63176	2.21e-17	5.51e-15	28.7751		LEPROT	-0.429437	8.19072	-13.6023	6.2e-39	1.55e-36	77.5895		GIMAP2	0.741786	6.30309	11.4455	1.14e-28	2.85e-26	54.2543
RFC5	0.30105	6.76787	8.60725	2.69e-17	6.62e-15	28.5806		CDCA5	0.891213	7.33757	13.5854	7.55e-39	1.86e-36	77.3943		DEK	0.467676	9.2095	11.4415	1.19e-28	2.92e-26	54.2133
CCNE2	0.498283	5.76307	8.59482	2.98e-17	7.21e-15	28.4822		CCNB1	0.949223	6.83184	13.5792	8.11e-39	1.96e-36	77.3234		SAMD4B	-0.467694	6.02054	-11.4199	1.48e-28	3.58e-26	53.9959
CDC25C	0.422721	5.10668	8.58586	3.21e-17	7.63e-15	28.4113		EXOSC8	0.528705	7.83628	13.5771	8.31e-39	1.98e-36	77.2993		GABPA	0.368744	5.9138	11.3961	1.89e-28	4.5e-26	53.7563
NXT2	0.42557	6.45157	8.52959	5.06e-17	1.17e-14	27.9676		MCM4	0.752895	7.07142	13.5593	1.02e-38	2.39e-36	77.0951		NPLOC4	-0.388604	7.00888	-11.3825	2.17e-28	5.09e-26	53.6191
PSMA4	0.242364	9.21638	8.52899	5.08e-17	1.17e-14	27.9629		OIP5	1.01025	6.74683	13.4797	2.57e-38	5.92e-36	76.184		NCK1	0.450851	7.40741	11.3703	2.46e-28	5.62e-26	53.4973
ERCC6L	0.456508	5.42239	8.5265	5.19e-17	1.18e-14	27.9433		SRPK1	0.50753	7.91207	13.4761	2.68e-38	6.09e-36	76.1423		ADAM10	0.519828	6.901	11.3686	2.5e-28	5.62e-26	53.48
CCNA2	0.579816	6.98699	8.52284	5.34e-17	1.2e-14	27.9145		KIF2C	0.811571	6.60398	13.4385	4.13e-38	9.25e-36	75.7137		SIN3B	-0.435993	5.6795	-11.3682	2.51e-28	5.62e-26	53.476
SKP2	0.404218	6.52242	8.5201	5.46e-17	1.2e-14	27.893		GSN	-0.678511	6.51124	-13.4116	5.64e-38	1.24e-35	75.4068		PRIM1	0.601777	6.62068	11.3595	2.74e-28	6.05e-26	53.3887
CENPQ	0.392403	5.62677	8.51366	5.75e-17	1.25e-14	27.8425		TPX2	1.00533	7.15198	13.386	7.57e-38	1.64e-35	75.1159		MRPL13	0.566933	8.34726	11.3549	2.88e-28	6.25e-26	53.3427
MRPL42	0.285139	7.14505	8.50545	6.15e-17	1.32e-14	27.7781		TFDP1	0.555562	7.88715	13.3675	9.36e-38	2e-35	74.9055		CDC42SE2	0.550362	7.35257	11.3354	3.51e-28	7.52e-26	53.1468
CDC25B	0.47448	7.9721	8.50085	6.38e-17	1.35e-14	27.7419		CENPA	0.743394	6.2889	13.3499	1.14e-37	2.41e-35	74.7066		PCNA	0.60295	8.45256	11.3333	3.59e-28	7.57e-26	53.1258
SMC4	0.326951	7.20105	8.4974	6.56e-17	1.37e-14	27.7149		CKS2	0.892342	8.81815	13.349	1.16e-37	2.41e-35	74.6954		GOLT1B	0.526352	7.22785	11.3247	3.91e-28	8.15e-26	53.0395
KIF15	0.543014	6.27044	8.49523	6.67e-17	1.37e-14	27.6979		CACYBP	0.453212	7.24039	13.3315	1.42e-37	2.91e-35	74.4968		GTF3C1	-0.408174	6.8359	-11.3219	4.03e-28	8.27e-26	53.0117
CENPN	0.474566	6.65841	8.49212	6.84e-17	1.39e-14	27.6735		RPAP3	0.43927	6.47383	13.3275	1.48e-37	3e-35	74.4515		BZW1	0.299469	6.88854	11.3116	4.47e-28	9.06e-26	52.9087
SGOL2	0.402707	5.96094	8.48552	7.22e-17	1.44e-14	27.6219		ECT2	0.834564	7.44764	13.3166	1.68e-37	3.35e-35	74.3288		ECHDC1	0.517477	7.01559	11.2575	7.74e-28	1.55e-25	52.3687
ECT2	0.523769	7.44764	8.46774	8.33e-17	1.64e-14	27.4828		RACGAP1	0.634365	7.48245	13.304	1.94e-37	3.82e-35	74.1864		CHORDC1	0.479355	6.17025	11.2529	8.11e-28	1.58e-25	52.3222
TFAM	0.360059	7.16882	8.46236	8.69e-17	1.69e-14	27.4408		KIF15	0.861417	6.27044	13.301	2.01e-37	3.91e-35	74.152		SDHD	0.505767	7.78244	11.2527	8.12e-28	1.58e-25	52.3206
LYAR	0.308479	7.06689	8.46024	8.84e-17	1.7e-14	27.4242		POLE2	0.751066	6.47208	13.2923	2.22e-37	4.26e-35	74.0535		CLSTN1	-0.463396	7.83987	-11.2313	1.01e-27	1.94e-25	52.1079
TCF21	-0.595045	5.66338	-8.4576	9.03e-17	1.71e-14	27.4036		BUB3	0.364466	8.06271	13.275	2.7e-37	5.13e-35	73.8577		TXNDC9	0.495406	7.21405	11.2201	1.13e-27	2.14e-25	51.9962
DONSON	0.356973	6.23923	8.44682	9.85e-17	1.83e-14	27.3195		DNA2	0.576575	5.7243	13.2677	2.94e-37	5.5e-35	73.7749		USP1	0.374961	7.5004	11.2069	1.29e-27	2.42e-25	51.865
ASCC3	0.277785	6.47029	8.44649	9.88e-17	1.83e-14	27.317		GINS1	0.790962	6.09093	13.2618	3.14e-37	5.81e-35	73.7092		C2orf47	0.407297	8.02356	11.1945	1.46e-27	2.71e-25	51.7423
ZNF343	0.257052	5.14065	8.44511	9.99e-17	1.83e-14	27.3062		NCAPD3	0.574388	6.4938	13.2112	5.59e-37	1.02e-34	73.1385		SRRM2	-0.501081	8.14509	-11.1399	2.53e-27	4.63e-25	51.2011
TFDP1	0.346322	7.88715	8.44286	1.02e-16	1.84e-14	27.2887		HMMR	0.938375	7.09335	13.1866	7.4e-37	1.34e-34	72.8617		KCTD2	-0.314972	5.8676	-11.1367	2.62e-27	4.69e-25	51.1702
MRPL13	0.377279	8.34726	8.41017	1.32e-16	2.34e-14	27.0344		RANBP1	0.508666	7.81636	13.1584	1.02e-36	1.82e-34	72.5447		ABL1	-0.479428	7.20927	-11.1362	2.63e-27	4.69e-25	51.165
ARHGAP24	-0.355569	5.36077	-8.40957	1.33e-16	2.34e-14	27.0297		DEPDC1	0.776058	5.45295	13.1462	1.17e-36	2.07e-34	72.4072		AASDHPPT	0.385947	6.7662	11.1132	3.31e-27	5.84e-25	50.9382
ANKRD32	0.278825	5.35027	8.39859	1.45e-16	2.53e-14	26.9445		RBM15	0.342552	7.02903	13.1366	1.31e-36	2.28e-34	72.2992		TMEM123	0.517343	9.48199	11.0928	4.06e-27	7.08e-25	50.7365
HEATR1	0.302103	6.91319	8.39155	1.53e-16	2.64e-14	26.8899		ABCE1	0.424232	7.83539	13.1131	1.71e-36	2.94e-34	72.0355		MRPL44	0.382779	6.25321	11.0608	5.59e-27	9.64e-25	50.4221
RAD51AP1	0.549103	7.33076	8.38685	1.59e-16	2.71e-14	26.8535		GART	0.432322	6.33734	13.1074	1.82e-36	3.1e-34	71.9719		AMD1	0.416489	7.95434	11.0406	6.85e-27	1.17e-24	50.2232
RANBP1	0.319827	7.81636	8.38263	1.65e-16	2.77e-14	26.8208		PRIM2	0.520758	5.16202	13.0919	2.17e-36	3.65e-34	71.7992		SH3BP5L	-0.471494	6.14246	-11.0375	7.06e-27	1.19e-24	50.193
CENPA	0.459904	6.2889	8.36797	1.85e-16	3.08e-14	26.7074		SMC2	0.555382	6.34142	13.0847	2.35e-36	3.92e-34	71.718		ARPC5	0.38321	8.67393	11.0328	7.4e-27	1.23e-24	50.1467
MCM10	0.509216	5.80523	8.36591	1.88e-16	3.1e-14	26.6914		UTP14A	0.448755	6.50355	13.0813	2.45e-36	4.03e-34	71.6795		PPP2R5B	-0.408857	5.82152	-10.9988	1.04e-26	1.71e-24	49.8141
NDC80	0.482343	6.67094	8.36443	1.9e-16	3.1e-14	26.6799		MRPL3	0.408708	9.2091	13.0743	2.65e-36	4.28e-34	71.6021		KIAA1033	0.453034	6.50314	10.9635	1.47e-26	2.4e-24	49.4689
KIF2A	0.354195	6.56969	8.36122	1.95e-16	3.14e-14	26.6551		UBE2C	1.06605	8.16371	13.0739	2.66e-36	4.28e-34	71.5978		LYPLA1	0.568014	7.43951	10.9608	1.51e-26	2.44e-24	49.4427
GAD1	0.772555	4.7005	8.35916	1.98e-16	3.16e-14	26.6392		MELK	0.935127	7.41566	13.0629	3.01e-36	4.8e-34	71.4749		POT1	0.328096	5.83978	10.9555	1.6e-26	2.54e-24	49.3911
CHAF1B	0.485173	5.74069	8.34994	2.13e-16	3.37e-14	26.5681		WDR43	0.534211	6.72731	13.0571	3.21e-36	5.07e-34	71.4097		NISCH	-0.516098	7.22352	-10.9416	1.83e-26	2.89e-24	49.2552
HMMR	0.585237	7.09335	8.33265	2.45e-16	3.82e-14	26.4347		GINS2	0.846696	6.31934	13.0408	3.87e-36	6.04e-34	71.2275		AP2A2	-0.374324	6.29312	-10.9189	2.29e-26	3.58e-24	49.0344
PIP5K1C	-0.368524	6.83508	-8.3297	2.51e-16	3.87e-14	26.412		CCNB2	0.793092	6.91684	13.0314	4.3e-36	6.64e-34	71.1226		GAK	-0.502521	7.57596	-10.9174	2.32e-26	3.59e-24	49.0205
DSN1	0.397441	6.43474	8.32244	2.65e-16	4.06e-14	26.3561		RNASEH2A	0.644217	6.83784	13.0287	4.43e-36	6.78e-34	71.0923		PPP1R3E	-0.440681	5.14521	-10.9142	2.4e-26	3.67e-24	48.9892
CAPRIN1	0.215822	7.13552	8.30496	3.05e-16	4.61e-14	26.2217		MARS2	0.505473	5.60119	13.0254	4.6e-36	6.97e-34	71.0556		MAT2B	0.353314	7.74417	10.8958	2.88e-26	4.36e-24	48.8102
DNA2	0.355539	5.7243	8.2893	3.45e-16	5.17e-14	26.1015		PAICS	0.549106	7.75427	13.0157	5.13e-36	7.69e-34	70.9479		RBM45	0.293272	6.12526	10.8885	3.1e-26	4.64e-24	48.7389
AURKA	0.587103	7.30314	8.28685	3.52e-16	5.22e-14	26.0827		PLK1	0.667873	5.8549	12.9912	6.76e-36	1e-33	70.6751		SFT2D1	0.492946	8.14756	10.8816	3.31e-26	4.88e-24	48.6727
MTHFD2	0.378562	7.40165	8.27507	3.86e-16	5.67e-14	25.9924		CKS1B	0.778256	8.50178	12.9712	8.47e-36	1.23e-33	70.4526		NFE2L2	0.440374	7.85426	10.8813	3.32e-26	4.88e-24	48.6696
MFAP4	-0.994392	7.61965	-8.25347	4.57e-16	6.65e-14	25.8272		NUFIP1	0.377935	5.57421	12.971	8.48e-36	1.23e-33	70.4506		IPO13	-0.393506	6.2417	-10.8785	3.41e-26	4.97e-24	48.6425
FEZ1	-0.47996	5.97619	-8.24982	4.71e-16	6.78e-14	25.7993		CENPF	0.80314	6.34194	12.9644	9.14e-36	1.32e-33	70.3771		MANEA	0.4354	5.25249	10.8766	3.48e-26	5e-24	48.6234
MGLL	-0.479993	7.11759	-8.21781	6.05e-16	8.64e-14	25.5553		SNX5	0.439434	7.20768	12.9493	1.08e-35	1.53e-33	70.2088		CDC40	0.354165	7.23186	10.8759	3.5e-26	5e-24	48.6167
USP1	0.246615	7.5004	8.20367	6.76e-16	9.56e-14	25.4477		CDC6	0.867165	5.47886	12.9491	1.09e-35	1.53e-33	70.2074		TMEM184B	-0.392586	7.28272	-10.8535	4.37e-26	6.18e-24	48.3995
GSN	-0.409517	6.51124	-8.20138	6.88e-16	9.64e-14	25.4304		PDE7B	-0.848726	5.37673	-12.939	1.22e-35	1.7e-33	70.0951		PGK1	0.446111	8.38648	10.833	5.35e-26	7.49e-24	48.2014
CRISPLD2	-0.541981	7.55953	-8.18391	7.88e-16	1.09e-13	25.2977		KIF11	0.805618	6.86308	12.936	1.26e-35	1.75e-33	70.0614		TNPO3	-0.427403	7.46453	-10.8272	5.66e-26	7.86e-24	48.1452
NDN	-0.709705	7.32817	-8.18277	7.95e-16	1.09e-13	25.2891		MFAP4	-1.57633	7.61965	-12.9132	1.62e-35	2.23e-33	69.8085		MSH2	0.524709	6.01029	10.8225	5.93e-26	8.15e-24	48.0999
TGFB1I1	-0.595567	6.97898	-8.17078	8.73e-16	1.18e-13	25.1983		FEN1	0.626993	7.60816	12.908	1.72e-35	2.35e-33	69.7517		GPD2	0.395587	5.54002	10.8171	6.25e-26	8.52e-24	48.0479
MRPS26	0.311973	7.20516	8.1705	8.75e-16	1.18e-13	25.1961		FANCB	0.50629	4.46757	12.8976	1.93e-35	2.61e-33	69.636		G3BP2	0.366981	7.51291	10.8103	6.68e-26	9.02e-24	47.9828
CDC7	0.40302	6.28315	8.15466	9.9e-16	1.33e-13	25.0763		EFEMP2	-0.868029	7.25352	-12.8953	1.98e-35	2.64e-33	69.6107		TMED5	0.393196	7.30149	10.8026	7.2e-26	9.56e-24	47.9083
NUPL1	0.192142	5.49708	8.14664	1.05e-15	1.4e-13	25.0157		NIP7	0.50724	7.47885	12.895	1.99e-35	2.64e-33	69.6068		CCDC17	-0.503455	4.37052	-10.8017	7.27e-26	9.56e-24	47.8995
PDZD2	-0.393086	4.82136	-8.14079	1.1e-15	1.44e-13	24.9715		NIF3L1	0.354713	8.06587	12.8505	3.28e-35	4.31e-33	69.1152		COMMD10	0.419416	6.93284	10.8017	7.27e-26	9.56e-24	47.8993
MACF1	-0.303427	6.82272	-8.14021	1.11e-15	1.44e-13	24.9671		ANLN	0.937337	6.90216	12.8154	4.85e-35	6.32e-33	68.7279		SEC24A	0.528489	6.44305	10.7669	1.02e-25	1.33e-23	47.5639
DIAPH3	0.358231	5.38606	8.13557	1.15e-15	1.47e-13	24.9321		PRICKLE1	-0.858678	6.05336	-12.7894	6.48e-35	8.37e-33	68.442		CBFB	0.434669	7.1041	10.758	1.11e-25	1.44e-23	47.4789
DPM1	0.325201	9.02104	8.13542	1.15e-15	1.47e-13	24.931		NUDT21	0.432474	7.06131	12.7842	6.87e-35	8.8e-33	68.3844		ABCB10	0.470925	6.91382	10.7541	1.16e-25	1.48e-23	47.4413
TIMM17A	0.20539	6.10533	8.13131	1.19e-15	1.51e-13	24.9		ZWILCH	0.533581	6.91249	12.7733	7.75e-35	9.85e-33	68.2645		UBQLN4	-0.418532	7.64406	-10.7488	1.22e-25	1.55e-23	47.3905
GGH	0.728405	7.57015	8.09984	1.52e-15	1.91e-13	24.6631		NUP160	0.42458	6.76767	12.7421	1.1e-34	1.38e-32	67.9221		ARFGAP1	-0.521795	6.6873	-10.7462	1.25e-25	1.58e-23	47.3654
ANLN	0.584403	6.90216	8.09546	1.57e-15	1.96e-13	24.6301		ASPM	0.900474	6.86551	12.7232	1.35e-34	1.69e-32	67.7149		MRPL39	0.477733	6.39311	10.7432	1.29e-25	1.61e-23	47.3363
HDAC2	0.290916	8.12674	8.08946	1.64e-15	2.03e-13	24.5851		CCT4	0.355166	7.25269	12.6921	1.91e-34	2.37e-32	67.3738		IQSEC2	-0.343125	5.07855	-10.7355	1.39e-25	1.72e-23	47.2628
DDX28	0.236661	5.65623	8.08191	1.74e-15	2.14e-13	24.5285		PGAM5	0.527696	5.46939	12.6912	1.93e-34	2.37e-32	67.3643		CIZ1	-0.286656	5.37302	-10.7188	1.63e-25	2.01e-23	47.1027
BUB1B	0.47738	6.36482	8.07739	1.8e-15	2.2e-13	24.4946		NUP37	0.446156	7.89133	12.6835	2.1e-34	2.56e-32	67.2805		COPS4	0.369735	6.97071	10.7074	1.83e-25	2.23e-23	46.9928
ZNF485	0.304285	4.807	8.0752	1.83e-15	2.22e-13	24.4782		MTHFD2	0.587678	7.40165	12.6789	2.21e-34	2.67e-32	67.2298		PPP1R13B	-0.49237	6.8311	-10.7054	1.86e-25	2.25e-23	46.9744
CBX7	-0.481945	6.84103	-8.07177	1.88e-15	2.26e-13	24.4524		KIF4A	0.826796	6.17118	12.6601	2.72e-34	3.26e-32	67.0246		RAB8B	0.513452	7.23614	10.6915	2.13e-25	2.56e-23	46.841
TRUB1	0.277164	5.19416	8.06298	2.01e-15	2.4e-13	24.3867		SEH1L	0.493739	6.86166	12.6476	3.12e-34	3.71e-32	66.8884		MGAT2	0.353337	7.07405	10.6775	2.44e-25	2.91e-23	46.7072
BRCA2	0.331533	4.83975	8.06091	2.05e-15	2.42e-13	24.3712		ZWINT	0.758739	7.19349	12.6228	4.11e-34	4.85e-32	66.6171		MRPL50	0.51372	7.54862	10.6743	2.52e-25	2.97e-23	46.6766
GSTCD	0.260722	5.76264	8.05495	2.14e-15	2.51e-13	24.3266		NCAPG	0.896488	6.8265	12.6145	4.5e-34	5.27e-32	66.5267		FAM49B	0.516475	6.51119	10.6711	2.6e-25	3.04e-23	46.6463
RPS6KA2	-0.325503	6.17767	-8.04472	2.32e-15	2.69e-13	24.2501		PRMT3	0.505208	7.49184	12.5869	6.09e-34	7.08e-32	66.2269		HDAC6	-0.346875	6.11243	-10.6674	2.69e-25	3.13e-23	46.6105
WDR12	0.300972	6.91635	8.04229	2.36e-15	2.72e-13	24.2319		RPS6KA2	-0.515966	6.17767	-12.5859	6.16e-34	7.11e-32	66.2156		CASZ1	-0.457527	5.93314	-10.6657	2.74e-25	3.16e-23	46.5945
MCM4	0.440708	7.07142	8.04167	2.37e-15	2.72e-13	24.2273		NDC80	0.73407	6.67094	12.5639	7.85e-34	8.98e-32	65.9767		CCNC	0.483979	7.00976	10.6501	3.19e-25	3.65e-23	46.4457
MSH2	0.350227	6.01029	8.03982	2.41e-15	2.73e-13	24.2135		RFC2	0.465235	6.08967	12.5617	8.04e-34	9.14e-32	65.9525		NMD3	0.436805	7.8639	10.6438	3.39e-25	3.85e-23	46.386
UTP18	0.290949	6.66896	8.03775	2.45e-15	2.75e-13	24.1981		MRPS26	0.485912	7.20516	12.5602	8.18e-34	9.22e-32	65.9367		CRIPAK	-0.480572	5.84441	-10.6376	3.6e-25	4.05e-23	46.3266
DHX9	0.244426	6.15709	8.03721	2.46e-15	2.75e-13	24.1941		CDC25A	0.733936	5.31215	12.5586	8.32e-34	9.31e-32	65.9193		CLCN6	-0.431489	5.66	-10.6351	3.69e-25	4.12e-23	46.3023
ECHDC2	-0.47206	7.72005	-8.03521	2.49e-15	2.77e-13	24.1791		CIRH1A	0.392605	8.01673	12.5564	8.53e-34	9.47e-32	65.8953		CLCN7	-0.376602	7.85709	-10.6212	4.22e-25	4.68e-23	46.1703
SRPX	-0.82232	6.59202	-8.03111	2.57e-15	2.84e-13	24.1485		CEP55	0.925479	7.44742	12.5315	1.12e-33	1.23e-31	65.6258		MYO1C	-0.435908	6.97757	-10.6106	4.67e-25	5.15e-23	46.0696
PTPRM	-0.439039	6.73841	-8.0257	2.68e-15	2.94e-13	24.1082		RPP40	0.578284	7.48839	12.5234	1.22e-33	1.34e-31	65.5379		ANAPC10	0.39124	6.51279	10.6081	4.78e-25	5.23e-23	46.0461
EFEMP2	-0.532406	7.25352	-8.01372	2.94e-15	3.2e-13	24.0189		SMC4	0.488198	7.20105	12.5229	1.23e-33	1.34e-31	65.5325		GNAI3	0.381731	7.28394	10.5996	5.19e-25	5.62e-23	45.9654
FAM49B	0.348398	6.51119	8.01172	2.99e-15	3.22e-13	24.004		FBLN5	-0.959202	6.40612	-12.5219	1.24e-33	1.34e-31	65.5216		YME1L1	0.44401	7.13205	10.5993	5.21e-25	5.62e-23	45.962
CENPK	0.482738	6.33327	8.011	3e-15	3.22e-13	23.9987		BRCA2	0.521383	4.83975	12.5118	1.39e-33	1.49e-31	65.4122		SLC33A1	0.450012	6.23825	10.5954	5.41e-25	5.8e-23	45.9247
TPX2	0.593663	7.15198	8.00891	3.05e-15	3.24e-13	23.9831		HJURP	0.898774	6.41011	12.5053	1.49e-33	1.59e-31	65.342		TM9SF2	0.460117	9.6051	10.5928	5.55e-25	5.9e-23	45.9002
RAD54L	0.541489	5.52558	8.00606	3.12e-15	3.29e-13	23.9619		PODN	-1.03367	6.45967	-12.4959	1.66e-33	1.75e-31	65.2398		GDI2	0.422322	9.36477	10.5856	5.95e-25	6.28e-23	45.8319
CLSPN	0.219396	4.23846	8.00455	3.16e-15	3.31e-13	23.9507		ARHGAP24	-0.535199	5.36077	-12.4932	1.71e-33	1.77e-31	65.2103		MFAP1	0.325647	7.49394	10.5834	6.08e-25	6.37e-23	45.811
NUDT21	0.266977	7.06131	7.99613	3.37e-15	3.49e-13	23.8881		TRUB1	0.435104	5.19416	12.4928	1.71e-33	1.77e-31	65.2059		CENPH	0.508957	5.49139	10.5795	6.31e-25	6.56e-23	45.7745
PRIM1	0.380586	6.62068	7.99587	3.37e-15	3.49e-13	23.8862		LIN9	0.516675	5.05054	12.4927	1.71e-33	1.77e-31	65.2048		RNFT1	0.547057	5.85731	10.5567	7.86e-25	8.12e-23	45.5583
CCDC92	-0.376616	7.58011	-7.98715	3.6e-15	3.7e-13	23.8214		KIF23	0.698104	5.45992	12.4841	1.88e-33	1.93e-31	65.1124		SELO	-0.366686	6.20454	-10.5491	8.45e-25	8.66e-23	45.4863
ABCA8	-0.730915	5.21794	-7.983	3.72e-15	3.79e-13	23.7907		AKAP13	-0.423267	6.86794	-12.4802	1.97e-33	2.01e-31	65.0697		TRNT1	0.381421	6.10685	10.5486	8.49e-25	8.66e-23	45.482
PRIM2	0.313292	5.16202	7.98014	3.8e-15	3.85e-13	23.7694		SETBP1	-1.07604	6.20882	-12.4721	2.15e-33	2.18e-31	64.9822		CEP164	-0.420393	6.10744	-10.5444	8.84e-25	8.96e-23	45.4422
PSRC1	0.365572	5.81973	7.97204	4.05e-15	4.07e-13	23.7094		PPAT	0.539218	6.63547	12.4349	3.22e-33	3.24e-31	64.5812		FAM76B	0.354676	5.85307	10.5425	9e-25	9.06e-23	45.4242
EME1	0.286133	5.52567	7.9683	4.16e-15	4.16e-13	23.6816		DDX21	0.578771	8.5309	12.4224	3.7e-33	3.69e-31	64.4461		TNPO2	-0.350185	7.36432	-10.5413	9.11e-25	9.1e-23	45.4127
FANCM	0.236602	4.59842	7.95396	4.64e-15	4.61e-13	23.5755		TFAM	0.535191	7.16882	12.4146	4.02e-33	3.99e-31	64.3629		SH2B1	-0.375422	6.04433	-10.5325	9.92e-25	9.85e-23	45.3292
AKAP13	-0.266138	6.86794	-7.95072	4.76e-15	4.69e-13	23.5516		TRAIP	0.793622	4.7651	12.408	4.32e-33	4.26e-31	64.2913		JAG2	-0.555629	6.17863	-10.5255	1.06e-24	1.05e-22	45.2631
ESCO2	0.321544	4.56381	7.94698	4.9e-15	4.8e-13	23.5239		CPSF3	0.374396	8.01685	12.3856	5.51e-33	5.4e-31	64.0508		ANAPC2	-0.282841	5.37064	-10.5115	1.21e-24	1.19e-22	45.1308
EXOSC9	0.298273	6.833	7.94163	5.1e-15	4.97e-13	23.4844		SRPX	-1.28486	6.59202	-12.385	5.55e-33	5.4e-31	64.0443		POGZ	-0.267756	5.57115	-10.5089	1.24e-24	1.21e-22	45.1068
CLIP3	-0.688835	6.27905	-7.93327	5.44e-15	5.26e-13	23.4227		PNO1	0.413286	6.90517	12.3762	6.11e-33	5.91e-31	63.9497		EIF3J	0.394628	7.25125	10.4968	1.4e-24	1.35e-22	44.9928
GEN1	0.265449	4.79291	7.92983	5.58e-15	5.36e-13	23.3973		POLQ	0.719405	6.16408	12.3751	6.18e-33	5.94e-31	63.9375		MAN1A1	0.540857	7.03014	10.4912	1.47e-24	1.42e-22	44.9397
RBM15	0.204039	7.02903	7.92798	5.66e-15	5.4e-13	23.3837		HEATR1	0.451209	6.91319	12.3701	6.53e-33	6.24e-31	63.8838		MZF1	-0.44529	6.42932	-10.4858	1.55e-24	1.48e-22	44.8883
SASS6	0.277776	5.49876	7.92566	5.76e-15	5.46e-13	23.3666		USP1	0.37667	7.5004	12.3668	6.77e-33	6.42e-31	63.8483		PSMA4	0.331296	9.21638	10.4751	1.72e-24	1.63e-22	44.7878
KPNA2	0.399845	7.79885	7.90854	6.56e-15	6.18e-13	23.2405		ACTL6A	0.480812	8.34498	12.3662	6.81e-33	6.42e-31	63.8422		ULK1	-0.520639	6.72089	-10.4721	1.77e-24	1.66e-22	44.7596
TCEAL3	-0.543418	7.59932	-7.90337	6.82e-15	6.39e-13	23.2025		BCCIP	0.394823	7.23464	12.3554	7.66e-33	7.18e-31	63.7265		MUM1	-0.435136	6.68984	-10.4719	1.77e-24	1.66e-22	44.7576
ZWILCH	0.325764	6.91249	7.90129	6.93e-15	6.45e-13	23.1871		SASS6	0.438576	5.49876	12.3508	8.05e-33	7.5e-31	63.6766		ANKRD32	0.386917	5.35027	10.4714	1.78e-24	1.66e-22	44.7532
CENPL	0.357218	6.01003	7.9006	6.96e-15	6.45e-13	23.1821		FOXF1	-0.939221	6.91615	-12.3443	8.64e-33	7.99e-31	63.6075		ACTR6	0.392245	7.00167	10.4695	1.81e-24	1.68e-22	44.7357
DEPDC1	0.46003	5.45295	7.89561	7.23e-15	6.65e-13	23.1454		TCF4	-0.728187	7.28465	-12.3408	8.98e-33	8.26e-31	63.5696		SCOC	0.570116	7.80692	10.4639	1.91e-24	1.76e-22	44.6829
PDE7B	-0.511008	5.37673	-7.89322	7.36e-15	6.73e-13	23.1279		BRCA1	0.465622	5.67811	12.3393	9.12e-33	8.33e-31	63.5542		PABPN1	-0.417265	7.15913	-10.4545	2.09e-24	1.91e-22	44.5943
GLI3	-0.341857	5.12023	-7.88788	7.67e-15	6.97e-13	23.0887		RRM1	0.455091	8.56211	12.3302	1.01e-32	9.14e-31	63.4568		NUP35	0.427705	6.88689	10.4262	2.74e-24	2.49e-22	44.3285
HAT1	0.342322	7.5632	7.88666	7.74e-15	6.99e-13	23.0797		MRPL11	0.392972	7.71814	12.3205	1.12e-32	1.01e-30	63.3526		C12orf29	0.401216	6.93085	10.3974	3.61e-24	3.26e-22	44.0596
CYB5R3	-0.263199	8.80457	-7.86576	9.06e-15	8.14e-13	22.9265		CDCA8	0.869768	6.81364	12.3135	1.21e-32	1.08e-30	63.2771		PNPLA6	-0.394087	6.95535	-10.3957	3.67e-24	3.29e-22	44.0435
PRICKLE1	-0.521169	6.05336	-7.86487	9.12e-15	8.14e-13	22.92		MASTL	0.55522	5.87148	12.3094	1.26e-32	1.13e-30	63.2337		ZNF629	-0.341251	5.97222	-10.3823	4.17e-24	3.72e-22	43.918
MRPL50	0.339487	7.54862	7.851	1.01e-14	8.99e-13	22.8184		ABCA8	-1.1412	5.21794	-12.3017	1.37e-32	1.22e-30	63.1517		GOLGA2	-0.378143	6.66875	-10.3779	4.34e-24	3.85e-22	43.8769
PODN	-0.640891	6.45967	-7.8499	1.02e-14	9.01e-13	22.8104		CASC5	0.501813	4.99252	12.3007	1.39e-32	1.22e-30	63.1404		RPE	0.364279	6.34212	10.3716	4.61e-24	4.07e-22	43.8181
NUP155	0.331105	6.61556	7.84254	1.08e-14	9.42e-13	22.7566		SSB	0.408468	8.08312	12.2878	1.59e-32	1.4e-30	63.0027		SERP1	0.451539	7.89536	10.3629	5.01e-24	4.39e-22	43.7374
RBMS3	-0.386706	4.95819	-7.84247	1.08e-14	9.42e-13	22.7561		CENPQ	0.573476	5.62677	12.2802	1.73e-32	1.51e-30	62.9219		SUCLA2	0.464978	7.7769	10.3585	5.22e-24	4.55e-22	43.6958
KIF23	0.432697	5.45992	7.83998	1.1e-14	9.5e-13	22.7379		SNRPC	0.409941	7.87707	12.2757	1.82e-32	1.57e-30	62.8733		ACADVL	-0.389473	8.70476	-10.3488	5.72e-24	4.96e-22	43.606
MELK	0.553906	7.41566	7.83971	1.1e-14	9.5e-13	22.736		GHR	-1.07387	5.25087	-12.2718	1.89e-32	1.63e-30	62.8323		PSMD10	0.393345	7.74256	10.3422	6.09e-24	5.25e-22	43.5445
CIRBP	-0.337964	8.20371	-7.82172	1.26e-14	1.08e-12	22.6047		JAM2	-0.965256	6.08446	-12.2682	1.97e-32	1.69e-30	62.7931		PI4KB	-0.338456	7.14654	-10.3391	6.28e-24	5.38e-22	43.5154
C16orf45	-0.296304	5.50323	-7.82115	1.27e-14	1.08e-12	22.6006		MRPL13	0.557301	8.34726	12.2614	2.12e-32	1.81e-30	62.7207		TMEM165	0.365618	6.47254	10.3379	6.35e-24	5.41e-22	43.5044
EMILIN1	-0.644155	6.52352	-7.81435	1.33e-14	1.13e-12	22.5511		HSPA14	0.461102	7.10009	12.2594	2.17e-32	1.83e-30	62.6997		ZNF644	0.318537	6.54208	10.3344	6.56e-24	5.56e-22	43.4718
CBX2	0.413984	5.23074	7.80076	1.48e-14	1.24e-12	22.4523		CRISPLD2	-0.821356	7.55953	-12.241	2.64e-32	2.23e-30	62.5031		CLIP2	-0.506347	6.23565	-10.3296	6.87e-24	5.78e-22	43.4268
HSPA4	0.26396	7.38565	7.79016	1.6e-14	1.34e-12	22.3752		FANCI	0.736448	6.3261	12.2395	2.68e-32	2.25e-30	62.488		RCHY1	0.299878	5.76446	10.3162	7.8e-24	6.53e-22	43.3023
UTP6	0.260016	7.03228	7.78352	1.68e-14	1.4e-12	22.3271		MCM3	0.482251	8.55321	12.2375	2.74e-32	2.28e-30	62.4666		DNAJB2	-0.398432	7.12507	-10.3155	7.85e-24	6.54e-22	43.2954
CENPE	0.469443	6.25691	7.77933	1.73e-14	1.44e-12	22.2966		ADCY4	-0.814656	6.12766	-12.2315	2.93e-32	2.42e-30	62.4025		GCA	0.515299	7.58862	10.2962	9.42e-24	7.8e-22	43.1162
CACYBP	0.260993	7.24039	7.77854	1.74e-14	1.44e-12	22.2909		CHEK2	0.499174	6.0604	12.2187	3.36e-32	2.77e-30	62.2663		CCM2	-0.362591	7.14467	-10.2856	1.04e-23	8.58e-22	43.0179
LEPROT	-0.24233	8.19072	-7.77705	1.76e-14	1.45e-12	22.2801		TENC1	-0.595842	5.46546	-12.2155	3.48e-32	2.85e-30	62.2317		SDCBP	0.591319	8.87484	10.2821	1.08e-23	8.81e-22	42.9859
SSB	0.255105	8.08312	7.77549	1.78e-14	1.45e-12	22.2688		GMNN	0.714689	7.46219	12.2041	3.93e-32	3.2e-30	62.1107		EML3	-0.376594	7.05504	-10.2706	1.2e-23	9.77e-22	42.879
LSM14B	0.215357	4.9303	7.77346	1.81e-14	1.47e-12	22.2541		HSPE1	0.525287	9.33695	12.1927	4.44e-32	3.6e-30	61.9904		EXTL3	-0.465528	6.18893	-10.2668	1.24e-23	1.01e-21	42.8445
TMPO	0.305309	6.20046	7.75312	2.11e-14	1.7e-12	22.1068		TCF21	-0.869097	5.66338	-12.1919	4.48e-32	3.61e-30	61.9815		H2AFZ	0.37077	10.0687	10.2546	1.39e-23	1.12e-21	42.7313
MRPL19	0.355939	6.16154	7.74596	2.22e-14	1.78e-12	22.0551		RAD54L	0.834343	5.52558	12.1753	5.36e-32	4.29e-30	61.8054		DCTN1	-0.268308	7.10872	-10.2491	1.47e-23	1.17e-21	42.6806
CSNK2A1	0.289222	6.72329	7.7353	2.41e-14	1.92e-12	21.9782		WDHD1	0.488483	4.95487	12.1749	5.38e-32	4.29e-30	61.8007		SKIV2L2	0.361957	7.07407	10.2488	1.47e-23	1.17e-21	42.6779
POLE2	0.431042	6.47208	7.72921	2.52e-14	2e-12	21.9342		PSMD14	0.459358	8.74695	12.168	5.79e-32	4.6e-30	61.7276		SLC25A29	-0.428756	5.65158	-10.2469	1.5e-23	1.18e-21	42.6601
CHEK2	0.31149	6.0604	7.72522	2.6e-14	2.05e-12	21.9055		GTPBP4	0.464635	8.00484	12.1655	5.95e-32	4.7e-30	61.7009		GOLGA8A	-0.536731	5.65896	-10.2469	1.5e-23	1.18e-21	42.6598
UTP14A	0.261433	6.50355	7.72137	2.67e-14	2.09e-12	21.8777		CKAP2L	0.848046	6.19602	12.1606	6.27e-32	4.92e-30	61.6491		PDDC1	-0.407768	6.30366	-10.2323	1.72e-23	1.35e-21	42.5254
HSP90AA1	0.189854	10.3791	7.7207	2.68e-14	2.09e-12	21.8729		CDCA3	0.847662	6.64031	12.1442	7.48e-32	5.84e-30	61.4758		TPRKB	0.39574	7.28957	10.2206	1.92e-23	1.5e-21	42.4173
NUDCD1	0.291284	6.03466	7.72032	2.69e-14	2.09e-12	21.8702		MRPL42	0.412471	7.14505	12.1434	7.54e-32	5.86e-30	61.4674		SMARCA5	0.391421	7.00667	10.1912	2.53e-23	1.96e-21	42.1469
TWF1	0.272395	6.02401	7.71773	2.74e-14	2.12e-12	21.8516		CENPE	0.742421	6.25691	12.1427	7.6e-32	5.87e-30	61.46		PSMA1	0.311312	8.87439	10.1754	2.93e-23	2.26e-21	42.0015
CCDC138	0.32496	5.2423	7.71403	2.82e-14	2.17e-12	21.8249		ZBTB47	-0.440737	5.47008	-12.1363	8.14e-32	6.26e-30	61.3921		PRDX3	0.493224	8.1719	10.1641	3.26e-23	2.5e-21	41.8969
RRM1	0.280972	8.56211	7.71311	2.84e-14	2.17e-12	21.8183		PSRC1	0.563704	5.81973	12.1326	8.47e-32	6.48e-30	61.353		FNDC3A	0.42908	6.40059	10.1502	3.71e-23	2.84e-21	41.7696
RRAS	-0.429303	8.04576	-7.71259	2.85e-14	2.17e-12	21.8146		NUPL1	0.289896	5.49708	12.1312	8.6e-32	6.54e-30	61.3381		DCUN1D1	0.330357	5.98404	10.1184	4.98e-23	3.79e-21	41.4788
SNRPB2	0.230582	8.01171	7.70729	2.96e-14	2.24e-12	21.7764		CDKN3	0.803256	7.132	12.1305	8.66e-32	6.56e-30	61.3305		ZFAND1	0.424647	7.50054	10.1169	5.05e-23	3.83e-21	41.4653
PRKD1	-0.449118	5.06023	-7.7067	2.98e-14	2.24e-12	21.7722		TGFB1I1	-0.895508	6.97898	-12.1258	9.11e-32	6.87e-30	61.2804		ZC3H15	0.461044	7.49933	10.1161	5.09e-23	3.84e-21	41.4579
FBXO5	0.345452	6.34788	7.70495	3.02e-14	2.26e-12	21.7596		TAF5	0.387312	6.21929	12.123	9.38e-32	7.01e-30	61.2516		POMT1	-0.406519	5.72374	-10.1118	5.3e-23	3.97e-21	41.4181
KIAA1524	0.317785	4.80252	7.70359	3.05e-14	2.26e-12	21.7498		CENPK	0.74016	6.33327	12.1229	9.39e-32	7.01e-30	61.2506		STAG2	0.375829	7.34592	10.1078	5.5e-23	4.11e-21	41.3814
ZBTB47	-0.276106	5.47008	-7.7033	3.05e-14	2.26e-12	21.7477		XPO4	0.391135	6.78732	12.1015	1.18e-31	8.77e-30	61.0242		LMAN1	0.381634	6.24784	10.1049	5.65e-23	4.19e-21	41.3554
PPAT	0.329675	6.63547	7.70296	3.06e-14	2.26e-12	21.7452		RBMS3	-0.604299	4.95819	-12.0957	1.26e-31	9.28e-30	60.9628		MPHOSPH6	0.437982	6.23336	10.1	5.92e-23	4.37e-21	41.3103
GRPEL2	0.228724	6.6538	7.69818	3.17e-14	2.33e-12	21.7109		POLR3K	0.46352	6.33568	12.0866	1.39e-31	1.02e-29	60.8668		RHOA	0.341905	9.04837	10.0977	6.04e-23	4.43e-21	41.2898
TBCE	0.27438	7.00158	7.69395	3.27e-14	2.39e-12	21.6806		TIMM17A	0.309146	6.10533	12.0796	1.49e-31	1.09e-29	60.7927		TRMT10C	0.430205	7.19883	10.0975	6.05e-23	4.43e-21	41.2877
SNRPC	0.25354	7.87707	7.69245	3.31e-14	2.41e-12	21.6698		DIP2C	-0.617625	6.19894	-12.0769	1.54e-31	1.12e-29	60.7647		ZNF692	-0.41974	6.30351	-10.0836	6.89e-23	5.02e-21	41.1605
TYMS	0.496092	7.46199	7.69126	3.34e-14	2.42e-12	21.6612		TMEM47	-0.957792	7.63652	-12.0766	1.54e-31	1.12e-29	60.7609		NUDCD1	0.423277	6.03466	10.0799	7.13e-23	5.17e-21	41.1266
NCBP1	0.287776	6.45012	7.69059	3.36e-14	2.42e-12	21.6564		EZH2	0.632644	6.25954	12.0695	1.66e-31	1.2e-29	60.6868		ECHDC2	-0.658587	7.72005	-10.0722	7.66e-23	5.52e-21	41.0569
ADCY9	-0.2992	5.81741	-7.68511	3.49e-14	2.51e-12	21.6171		UCHL5	0.443776	6.42358	12.0561	1.92e-31	1.38e-29	60.545		VGLL4	-0.393829	8.28061	-10.0716	7.7e-23	5.53e-21	41.0511
CDK5RAP1	0.230974	6.91636	7.68135	3.59e-14	2.56e-12	21.5902		PTGES3	0.501607	9.49633	12.0326	2.46e-31	1.76e-29	60.2978		GIGYF1	-0.296684	5.18208	-10.0697	7.84e-23	5.6e-21	41.0337
NISCH	-0.325422	7.22352	-7.67862	3.67e-14	2.6e-12	21.5706		TOP2A	0.979926	7.86125	12.0244	2.69e-31	1.91e-29	60.2121		DLAT	0.386163	7.13668	10.0572	8.8e-23	6.25e-21	40.9203
LPAR1	-0.466204	6.26421	-7.67798	3.68e-14	2.6e-12	21.566		NME1	0.53377	9.04539	12.0133	3.03e-31	2.14e-29	60.0951		B3GAT3	-0.396112	5.82552	-10.0476	9.62e-23	6.8e-21	40.8332
POLQ	0.439818	6.16408	7.66549	4.04e-14	2.84e-12	21.4765		NUP155	0.513807	6.61556	12.0115	3.08e-31	2.17e-29	60.0763		C17orf70	-0.420838	6.85168	-10.0296	1.14e-22	8e-21	40.6693
LOXL1	-0.382266	5.95293	-7.66239	4.13e-14	2.9e-12	21.4544		NISCH	-0.51563	7.22352	-12.0083	3.19e-31	2.24e-29	60.0424		EIF4E	0.365565	5.843	10.0269	1.17e-22	8.16e-21	40.6444
NUSAP1	0.468837	7.64758	7.65068	4.51e-14	3.14e-12	21.3706		EEF1E1	0.494521	6.97566	12.0024	3.4e-31	2.36e-29	59.9805		CENPK	0.672445	6.33327	10.0264	1.17e-22	8.16e-21	40.64
STIL	0.459003	7.34568	7.64911	4.56e-14	3.16e-12	21.3594		AURKB	0.827101	6.23134	12.0022	3.4e-31	2.36e-29	59.9789		MRPL30	0.334105	6.24928	10.0098	1.36e-22	9.47e-21	40.4894
GTPBP4	0.288307	8.00484	7.64831	4.58e-14	3.17e-12	21.3537		COX7A1	-0.967382	7.06028	-12.0021	3.41e-31	2.36e-29	59.9772		CAB39	0.326217	8.32771	10.0049	1.43e-22	9.86e-21	40.4452
MRPL30	0.229258	6.24928	7.6446	4.71e-14	3.24e-12	21.3272		KIF2A	0.515112	6.56969	12.0015	3.43e-31	2.36e-29	59.9711		MORF4L1	0.471382	8.89253	10.0021	1.47e-22	1.01e-20	40.4195
TIMP2	-0.523745	8.26716	-7.63415	5.09e-14	3.48e-12	21.2527		NCAPH	0.78526	5.40824	11.9991	3.52e-31	2.41e-29	59.946		ZCCHC9	0.36092	7.43699	9.99298	1.59e-22	1.09e-20	40.3372
SRPK1	0.283546	7.91207	7.62813	5.32e-14	3.62e-12	21.2098		PTTG1	0.795703	8.39592	11.9971	3.59e-31	2.45e-29	59.9251		NUP54	0.298436	6.60547	9.99148	1.62e-22	1.1e-20	40.3236
C10orf54	-0.350878	6.50163	-7.61939	5.67e-14	3.85e-12	21.1475		UPF3B	0.428796	6.56753	11.987	4e-31	2.72e-29	59.8186		PRR12	-0.364064	5.09107	-9.9845	1.72e-22	1.17e-20	40.2605
LSM5	0.263022	8.18734	7.61741	5.75e-14	3.89e-12	21.1334		PLAC9	-1.05308	5.61577	-11.9755	4.52e-31	3.05e-29	59.6986		CD58	0.462891	6.89824	9.98205	1.76e-22	1.19e-20	40.2384
PLAT	-0.530509	7.3612	-7.61003	6.07e-14	4.08e-12	21.0809		DLAT	0.418501	7.13668	11.9729	4.65e-31	3.13e-29	59.6712		MTPN	0.519647	6.73081	9.98033	1.79e-22	1.2e-20	40.2228
ZNF781	-0.286434	4.01442	-7.60653	6.23e-14	4.17e-12	21.0561		EXOSC3	0.448434	6.78276	11.9716	4.71e-31	3.15e-29	59.6576		TMEM135	0.43266	6.24661	9.97581	1.87e-22	1.25e-20	40.1819
FOXF2	-0.600106	6.46411	-7.60253	6.42e-14	4.28e-12	21.0276		PDE1A	-0.78327	5.1985	-11.9617	5.23e-31	3.49e-29	59.5543		MRPL47	0.38777	6.88733	9.96653	2.03e-22	1.35e-20	40.098
TRIOBP	-0.234043	6.97585	-7.59981	6.55e-14	4.34e-12	21.0083		NUSAP1	0.742334	7.64758	11.9559	5.56e-31	3.69e-29	59.4939		DPP9	-0.43812	6.52615	-9.95873	2.18e-22	1.45e-20	40.0276
ATF1	0.251887	6.29603	7.59863	6.6e-14	4.36e-12	20.9999		GRPEL2	0.359713	6.6538	11.9492	5.97e-31	3.95e-29	59.4236		NUDCD3	-0.304434	6.52811	-9.95737	2.21e-22	1.46e-20	40.0154
PBK	0.634292	7.09804	7.59634	6.71e-14	4.42e-12	20.9837		RCC1	0.449009	5.71649	11.9463	6.16e-31	4.05e-29	59.393		NBN	0.386638	6.91069	9.9566	2.23e-22	1.46e-20	40.0084
LMNB1	0.420824	6.33095	7.59333	6.86e-14	4.49e-12	20.9623		E2F7	0.639091	5.48227	11.9394	6.63e-31	4.34e-29	59.3212		STK17B	0.420824	5.71437	9.95208	2.32e-22	1.52e-20	39.9676
C2orf47	0.248061	8.02356	7.58825	7.12e-14	4.64e-12	20.9263		NDN	-1.04596	7.32817	-11.9026	9.78e-31	6.37e-29	58.9368		DHX15	0.269297	9.13628	9.93948	2.61e-22	1.7e-20	39.8539
CENPJ	0.332639	5.70671	7.5849	7.3e-14	4.74e-12	20.9025		C1orf112	0.647029	5.92422	11.8987	1.02e-30	6.61e-29	58.8963		FXR2	-0.33519	6.36985	-9.93922	2.61e-22	1.7e-20	39.8516
QSER1	0.200928	5.6871	7.58197	7.46e-14	4.82e-12	20.8817		KLF9	-0.673696	7.34419	-11.8726	1.34e-30	8.68e-29	58.624		CHMP2B	0.427302	8.08559	9.93758	2.65e-22	1.71e-20	39.8369
HMGB2	0.350019	7.85954	7.57929	7.61e-14	4.89e-12	20.8628		DSN1	0.573653	6.43474	11.8559	1.6e-30	1.03e-28	58.4503		SCO1	0.479036	7.59603	9.93135	2.81e-22	1.81e-20	39.7807
PRMT3	0.300219	7.49184	7.57844	7.65e-14	4.9e-12	20.8567		KIAA1524	0.495408	4.80252	11.853	1.65e-30	1.06e-28	58.4204		DDX21	0.507355	8.5309	9.9132	3.32e-22	2.12e-20	39.6173
MARS2	0.290108	5.60119	7.57436	7.89e-14	5.03e-12	20.8278		MCM6	0.447149	8.05256	11.8446	1.8e-30	1.15e-28	58.3332		UCHL5	0.400727	6.42358	9.91049	3.4e-22	2.17e-20	39.593
RNF219	0.268611	6.31549	7.5688	8.21e-14	5.22e-12	20.7885		PRICKLE2	-0.897819	6.28791	-11.8247	2.22e-30	1.41e-28	58.1259		XRN2	0.448748	6.80825	9.90622	3.53e-22	2.24e-20	39.5546
PDE1A	-0.488536	5.1985	-7.55913	8.81e-14	5.57e-12	20.7201		BYSL	0.530231	6.94958	11.8187	2.37e-30	1.5e-28	58.0644		CTDSPL2	0.306117	5.93625	9.90251	3.66e-22	2.31e-20	39.5213
FEN1	0.362343	7.60816	7.55806	8.88e-14	5.59e-12	20.7125		MRPL47	0.418247	6.88733	11.8086	2.63e-30	1.66e-28	57.9592		IQSEC1	-0.369465	6.49294	-9.90095	3.71e-22	2.34e-20	39.5073
NUP160	0.247851	6.76767	7.53643	1.04e-13	6.52e-12	20.5599		NXT1	0.398106	8.10607	11.8029	2.79e-30	1.75e-28	57.9005		TRMT11	0.353296	6.87329	9.88621	4.24e-22	2.66e-20	39.3749
GHR	-0.65057	5.25087	-7.53262	1.07e-13	6.68e-12	20.5331		CCDC58	0.742375	6.94878	11.7912	3.16e-30	1.97e-28	57.7789		PSPC1	0.324468	6.14311	9.8853	4.28e-22	2.67e-20	39.3668
CDC25A	0.434287	5.31215	7.52927	1.1e-13	6.81e-12	20.5095		PBK	0.997529	7.09804	11.7909	3.17e-30	1.97e-28	57.7759		KYNU	0.894356	6.40847	9.87138	4.86e-22	3.02e-20	39.2419
BRCA1	0.280394	5.67811	7.52871	1.1e-13	6.81e-12	20.5055		NARS2	0.520118	7.10737	11.7813	3.51e-30	2.17e-28	57.676		LZTR1	-0.398501	7.14624	-9.86993	4.92e-22	3.05e-20	39.2289
GTF3C3	0.215547	6.56197	7.52827	1.1e-13	6.81e-12	20.5024		RFC5	0.417427	6.76787	11.7791	3.59e-30	2.21e-28	57.6539		ATG9A	-0.354241	6.73497	-9.86784	5.02e-22	3.1e-20	39.2102
AHNAK	-0.349169	7.28587	-7.52409	1.14e-13	6.99e-12	20.4729		RBL1	0.360085	4.70847	11.7669	4.08e-30	2.51e-28	57.5272		MBD3	-0.360245	6.22533	-9.86406	5.19e-22	3.19e-20	39.1764
RBM45	0.181963	6.12526	7.51912	1.18e-13	7.21e-12	20.438		C16orf45	-0.45146	5.50323	-11.7614	4.32e-30	2.64e-28	57.4707		METTL5	0.401495	7.66882	9.86168	5.31e-22	3.25e-20	39.155
KANK2	-0.499743	6.29744	-7.51791	1.19e-13	7.25e-12	20.4295		NEIL3	0.546472	4.87774	11.7588	4.43e-30	2.7e-28	57.4443		MADD	-0.253096	6.19036	-9.85791	5.49e-22	3.34e-20	39.1212
NUDT15	0.309806	7.04286	7.51118	1.25e-13	7.58e-12	20.3822		MRPS17	0.469754	8.08153	11.7587	4.44e-30	2.7e-28	57.4429		PIGK	0.372443	6.53248	9.8577	5.5e-22	3.34e-20	39.1194
GLRB	-0.448273	4.62289	-7.49854	1.37e-13	8.27e-12	20.2934		NUP35	0.43882	6.88689	11.7507	4.83e-30	2.92e-28	57.3598		HPS3	0.427492	6.22658	9.81471	8.14e-22	4.92e-20	38.7352
SETBP1	-0.638339	6.20882	-7.49643	1.39e-13	8.37e-12	20.2786		CLDN5	-0.840227	6.59204	-11.7488	4.93e-30	2.97e-28	57.3403		FAM50A	-0.369238	8.63327	-9.81182	8.36e-22	5.03e-20	38.7095
FAM20C	-0.336884	5.76784	-7.49403	1.41e-13	8.48e-12	20.2618		MRTO4	0.50218	6.78225	11.7387	5.48e-30	3.28e-28	57.2358		BCCIP	0.344356	7.23464	9.80994	8.5e-22	5.1e-20	38.6927
RAD21	0.299989	8.27934	7.48753	1.48e-13	8.85e-12	20.2162		CHAF1B	0.690975	5.74069	11.737	5.57e-30	3.33e-28	57.2186		UEVLD	0.29898	5.95591	9.80826	8.63e-22	5.15e-20	38.6777
MAPKAPK5	0.217744	6.86459	7.48079	1.56e-13	9.26e-12	20.169		KIFC1	0.963685	6.56934	11.7345	5.72e-30	3.4e-28	57.1933		SYNCRIP	0.341414	7.90649	9.79222	9.98e-22	5.94e-20	38.5348
PES1	0.239619	5.70884	7.48003	1.56e-13	9.27e-12	20.1636		SMARCD3	-0.517144	5.17341	-11.7138	7.1e-30	4.19e-28	56.979		SKI	-0.325925	6.15175	-9.78917	1.03e-21	6.07e-20	38.5077
ACTA2	-0.530558	9.41142	-7.47811	1.59e-13	9.36e-12	20.1502		MEIS1	-0.877541	6.5128	-11.7137	7.11e-30	4.19e-28	56.9788		GFM1	0.300844	7.4088	9.78893	1.03e-21	6.07e-20	38.5056
GPD2	0.245608	5.54002	7.47482	1.62e-13	9.52e-12	20.1272		LMNB1	0.657294	6.33095	11.7057	7.73e-30	4.54e-28	56.8963		CACNB3	-0.491065	6.47202	-9.78237	1.09e-21	6.42e-20	38.4472
EEF1E1	0.303961	6.97566	7.4747	1.63e-13	9.52e-12	20.1264		KIAA0247	-0.414072	7.48056	-11.6896	9.14e-30	5.36e-28	56.7299		NUDCD2	0.392617	6.06198	9.78127	1.1e-21	6.46e-20	38.4374
NIF3L1	0.203556	8.06587	7.47171	1.66e-13	9.69e-12	20.1055		LSM5	0.408887	8.18734	11.6876	9.33e-30	5.44e-28	56.7097		TMEM126A	0.436691	8.36949	9.7765	1.15e-21	6.71e-20	38.395
CDKN3	0.48825	7.132	7.47067	1.67e-13	9.73e-12	20.0982		PANK2	0.304884	6.41819	11.6779	1.03e-29	6e-28	56.6103		RNF219	0.386123	6.31549	9.7755	1.16e-21	6.75e-20	38.3861
PNO1	0.246204	6.90517	7.47006	1.68e-13	9.73e-12	20.0939		NOLC1	0.502778	7.05783	11.6677	1.15e-29	6.64e-28	56.5055		CD164	0.583125	7.96213	9.76353	1.29e-21	7.49e-20	38.2798
KIF2C	0.445102	6.60398	7.46753	1.71e-13	9.87e-12	20.0762		KPNA2	0.597645	7.79885	11.6669	1.16e-29	6.68e-28	56.497		C3orf38	0.401302	6.18629	9.75146	1.44e-21	8.32e-20	38.1726
CPSF3	0.222734	8.01685	7.4656	1.74e-13	9.97e-12	20.0627		UTP18	0.427798	6.66896	11.6644	1.19e-29	6.82e-28	56.4716		CEP57	0.39365	6.43458	9.72788	1.79e-21	1.03e-19	37.9636
ARHGEF17	-0.411594	5.81667	-7.45839	1.83e-13	1.05e-11	20.0123		CCNF	0.653614	6.33749	11.6627	1.21e-29	6.92e-28	56.4539		SRP72	0.299342	7.26295	9.72636	1.81e-21	1.04e-19	37.9502
NOL11	0.234522	8.12298	7.45392	1.89e-13	1.08e-11	19.9811		DPM1	0.472283	9.02104	11.661	1.23e-29	7.01e-28	56.4367		LACTB	0.429359	6.56861	9.72434	1.84e-21	1.05e-19	37.9323
ZWINT	0.44176	7.19349	7.44632	2e-13	1.13e-11	19.9281		PDGFRA	-0.736277	6.74671	-11.657	1.28e-29	7.28e-28	56.3951		DLGAP4	-0.386506	6.01299	-9.71419	2.02e-21	1.15e-19	37.8425
OIP5	0.550793	6.74683	7.44619	2e-13	1.13e-11	19.9272		RPA3	0.514602	8.65923	11.6568	1.29e-29	7.28e-28	56.3932		ALMS1	-0.373058	6.10106	-9.69914	2.31e-21	1.31e-19	37.7095
SAAL1	0.267618	7.2278	7.44432	2.02e-13	1.14e-11	19.9142		BOC	-0.761467	5.3945	-11.6545	1.32e-29	7.43e-28	56.3693		RFNG	-0.346958	6.57475	-9.69896	2.32e-21	1.31e-19	37.7079
CENPF	0.455088	6.34194	7.44305	2.04e-13	1.15e-11	19.9053		RAI2	-0.768791	5.82863	-11.6526	1.34e-29	7.54e-28	56.3504		SGSM2	-0.47206	7.36255	-9.69419	2.42e-21	1.36e-19	37.6657
MTX2	0.219653	7.67565	7.44142	2.07e-13	1.16e-11	19.894		EMILIN1	-0.97317	6.52352	-11.6519	1.35e-29	7.57e-28	56.3434		SPTAN1	-0.338199	7.25985	-9.69115	2.49e-21	1.39e-19	37.6389
MCM3	0.288922	8.55321	7.42837	2.27e-13	1.27e-11	19.8031		TTF2	0.494183	6.10783	11.6321	1.66e-29	9.26e-28	56.1402		ZBTB48	-0.40642	6.18563	-9.68214	2.7e-21	1.5e-19	37.5595
MTF2	0.320682	6.68492	7.42307	2.36e-13	1.31e-11	19.7662		SVEP1	-0.835247	5.60203	-11.6268	1.76e-29	9.75e-28	56.086		SGSH	-0.446898	7.0112	-9.68067	2.73e-21	1.52e-19	37.5465
TOP2A	0.596237	7.86125	7.41282	2.54e-13	1.4e-11	19.695		PTRF	-0.822852	8.13191	-11.6183	1.92e-29	1.06e-27	55.9988		MAPKBP1	-0.312818	5.22093	-9.67697	2.82e-21	1.56e-19	37.5138
GREM2	-0.645842	4.78958	-7.41225	2.55e-13	1.4e-11	19.691		FAM64A	0.715834	6.0635	11.609	2.11e-29	1.16e-27	55.9031		ACP1	0.435037	7.97096	9.673	2.93e-21	1.61e-19	37.4789
SLC16A2	-0.468165	5.61089	-7.41116	2.57e-13	1.41e-11	19.6835		DDR2	-0.835619	6.22066	-11.6054	2.19e-29	1.2e-27	55.8664		GFM2	0.366896	5.7581	9.66329	3.19e-21	1.75e-19	37.3933
SELM	-0.54776	8.08508	-7.39673	2.85e-13	1.56e-11	19.5833		SNRPD1	0.490238	7.0523	11.597	2.39e-29	1.3e-27	55.7808		UBE2N	0.302138	8.33928	9.65535	3.43e-21	1.88e-19	37.3235
PSMG1	0.335285	7.74119	7.39427	2.9e-13	1.58e-11	19.5663		FBLN1	-1.12921	7.23173	-11.597	2.39e-29	1.3e-27	55.7803		LOC155060	-0.390537	4.99089	-9.65306	3.5e-21	1.91e-19	37.3034
PBXIP1	-0.279245	6.10283	-7.38753	3.04e-13	1.65e-11	19.5196		CLIP3	-1.01979	6.27905	-11.5919	2.52e-29	1.37e-27	55.7291		PLSCR1	0.5297	6.96379	9.64444	3.78e-21	2.05e-19	37.2275
NFIC	-0.365855	6.33169	-7.38348	3.13e-13	1.69e-11	19.4916		TATDN1	0.489934	7.37835	11.5814	2.81e-29	1.52e-27	55.6218		MTX2	0.316301	7.67565	9.62786	4.38e-21	2.37e-19	37.0819
MYBL2	0.417394	5.6525	7.38204	3.16e-13	1.71e-11	19.4816		MRPL30	0.351637	6.24928	11.5726	3.08e-29	1.66e-27	55.5319		SYPL1	0.453436	8.38647	9.61728	4.82e-21	2.6e-19	36.9891
FASTKD5	0.264831	7.18968	7.37444	3.34e-13	1.79e-11	19.4291		GYPC	-0.769988	6.9169	-11.568	3.23e-29	1.73e-27	55.4848		ERCC8	0.278828	4.79778	9.61232	5.04e-21	2.71e-19	36.9456
PPP5C	0.263681	5.21923	7.374	3.35e-13	1.79e-11	19.426		CDC20	0.926618	7.96933	11.5675	3.24e-29	1.74e-27	55.4798		TATDN1	0.446036	7.37835	9.59841	5.7e-21	3.05e-19	36.8237
MRGPRF	-0.757803	6.27891	-7.37005	3.45e-13	1.84e-11	19.3987		MIPEP	0.482438	6.84341	11.5656	3.31e-29	1.77e-27	55.4597		NIF3L1	0.290731	8.06587	9.58824	6.24e-21	3.33e-19	36.7347
BUB3	0.199621	8.06271	7.36679	3.53e-13	1.88e-11	19.3762		NR2F1	-1.05094	6.70957	-11.5604	3.49e-29	1.86e-27	55.4071		DCK	0.447308	6.99367	9.56823	7.46e-21	3.97e-19	36.5598
PRKCDBP	-0.470647	7.57023	-7.36568	3.56e-13	1.88e-11	19.3686		EML1	-0.916158	6.06901	-11.5561	3.65e-29	1.93e-27	55.3633		FLJ11292	-0.313367	4.25523	-9.56567	7.63e-21	4.04e-19	36.5375
C1orf112	0.395013	5.92422	7.36007	3.7e-13	1.95e-11	19.3298		POLR2D	0.436399	6.41269	11.5561	3.65e-29	1.93e-27	55.3631		SKIV2L	-0.374252	7.06747	-9.55793	8.18e-21	4.32e-19	36.47
DDR2	-0.522865	6.22066	-7.35756	3.77e-13	1.98e-11	19.3125		NCBP1	0.437857	6.45012	11.549	3.93e-29	2.07e-27	55.2907		ASB6	-0.309793	5.66878	-9.54559	9.12e-21	4.8e-19	36.3624
CKS1B	0.435544	8.50178	7.35501	3.84e-13	2.01e-11	19.2949		H2AFZ	0.380079	10.0687	11.5474	3.99e-29	2.09e-27	55.2746		PSMD14	0.395714	8.74695	9.54231	9.39e-21	4.92e-19	36.3338
PRDM2	-0.138885	5.25075	-7.34964	3.99e-13	2.08e-11	19.2579		GSG2	0.565502	4.91535	11.5456	4.07e-29	2.13e-27	55.256		RBM10	-0.272108	7.70917	-9.54205	9.42e-21	4.92e-19	36.3315
COX7A1	-0.584624	7.06028	-7.349	4e-13	2.08e-11	19.2535		MPDZ	-0.814387	6.06732	-11.532	4.68e-29	2.44e-27	55.1178		ADSS	0.295674	7.10972	9.54012	9.58e-21	4.99e-19	36.3147
PAK1IP1	0.284499	7.19612	7.34817	4.03e-13	2.09e-11	19.2478		DONSON	0.493744	6.23923	11.531	4.73e-29	2.45e-27	55.1076		SNX33	-0.30668	6.23605	-9.53046	1.04e-20	5.41e-19	36.2305
SNRPD1	0.306248	7.0523	7.34014	4.26e-13	2.2e-11	19.1925		SKP2	0.553857	6.52242	11.5222	5.18e-29	2.68e-27	55.0175		CKAP2	0.483407	6.17694	9.51822	1.16e-20	6.01e-19	36.1241
MYL6	-0.163989	10.2362	-7.32764	4.66e-13	2.4e-11	19.1065		SERPINF1	-0.973935	7.51391	-11.5216	5.21e-29	2.69e-27	55.0117		ATG3	0.313316	7.33816	9.51704	1.18e-20	6.06e-19	36.1138
CH25H	-0.618256	5.99583	-7.32469	4.76e-13	2.44e-11	19.0862		STMN1	0.505362	6.00522	11.5204	5.28e-29	2.71e-27	54.9998		DHFR	0.414878	5.96527	9.51112	1.24e-20	6.36e-19	36.0624
SPATA5L1	0.247303	6.64783	7.3083	5.34e-13	2.73e-11	18.9738		CIRBP	-0.504002	8.20371	-11.5125	5.72e-29	2.93e-27	54.9197		TMPO	0.416576	6.20046	9.50478	1.31e-20	6.7e-19	36.0074
MRPL11	0.229963	7.71814	7.30495	5.47e-13	2.79e-11	18.9507		SUV39H1	0.525529	6.64233	11.5116	5.78e-29	2.95e-27	54.9098		SLBP	0.41361	7.75878	9.50105	1.35e-20	6.88e-19	35.975
MASTL	0.325192	5.87148	7.30474	5.48e-13	2.79e-11	18.9493		TOP1MT	0.497937	5.90524	11.5079	6e-29	3.05e-27	54.8726		RFC3	0.514932	6.0985	9.49901	1.38e-20	6.98e-19	35.9572
TCEAL7	-0.550377	5.25302	-7.29982	5.67e-13	2.87e-11	18.9156		CCT6A	0.402386	8.31457	11.5056	6.15e-29	3.11e-27	54.8493		CTSC	0.530421	7.87164	9.49044	1.49e-20	7.51e-19	35.8829
YPEL3	-0.321301	6.76717	-7.29949	5.69e-13	2.87e-11	18.9133		SNRPB2	0.348723	8.01171	11.5044	6.22e-29	3.14e-27	54.8368		C14orf142	0.456794	6.98698	9.48748	1.53e-20	7.68e-19	35.8572
RAD54B	0.372503	5.70313	7.29853	5.73e-13	2.88e-11	18.9068		MAPKAPK5	0.339213	6.86459	11.5022	6.37e-29	3.2e-27	54.8146		CHMP5	0.460812	8.25814	9.48392	1.58e-20	7.9e-19	35.8264
GINS2	0.467468	6.31934	7.29494	5.87e-13	2.95e-11	18.8822		PSPC1	0.343591	6.14311	11.4989	6.59e-29	3.3e-27	54.7809		NUP37	0.366369	7.89133	9.4815	1.61e-20	8.04e-19	35.8054
LMO3	-0.533764	4.55486	-7.29311	5.95e-13	2.97e-11	18.8697		SNRPF	0.460235	9.12118	11.4952	6.84e-29	3.42e-27	54.7441		ZNF524	-0.424772	6.38244	-9.47759	1.67e-20	8.3e-19	35.7715
SPARCL1	-0.711158	9.47265	-7.28993	6.09e-13	3.03e-11	18.8479		CYBRD1	-1.02945	7.74587	-11.493	6.99e-29	3.48e-27	54.7216		CENPQ	0.486068	5.62677	9.47529	1.7e-20	8.44e-19	35.7516
PRPF40A	0.195074	7.24847	7.28877	6.14e-13	3.05e-11	18.84		SELM	-0.862244	8.08508	-11.4918	7.09e-29	3.52e-27	54.7086		PHKA2	-0.455122	6.43442	-9.46294	1.9e-20	9.38e-19	35.6447
SCUBE2	-0.580622	4.83131	-7.28616	6.25e-13	3.09e-11	18.8222		SAAL1	0.418519	7.2278	11.4903	7.2e-29	3.56e-27	54.6937		GGH	0.946887	7.57015	9.46048	1.94e-20	9.55e-19	35.6234
XKRX	0.407788	4.17342	7.28395	6.35e-13	3.13e-11	18.807		BIRC5	0.783505	6.40545	11.4802	7.98e-29	3.94e-27	54.5914		DLG4	-0.432283	4.87798	-9.45558	2.02e-20	9.94e-19	35.581
SMC2	0.305022	6.34142	7.28109	6.48e-13	3.18e-11	18.7875		FAM49B	0.505524	6.51119	11.4736	8.54e-29	4.2e-27	54.5241		ULK3	-0.337453	5.83781	-9.44663	2.19e-20	1.07e-18	35.5037
CDCA3	0.501194	6.64031	7.27521	6.75e-13	3.31e-11	18.7473		PAK1IP1	0.449754	7.19612	11.4651	9.32e-29	4.56e-27	54.4387		AAK1	-0.294784	5.15459	-9.44255	2.27e-20	1.11e-18	35.4685
FXYD6	-0.590938	6.28587	-7.27366	6.83e-13	3.33e-11	18.7367		MRPL44	0.361171	6.25321	11.4643	9.4e-29	4.59e-27	54.4302		WIPI2	-0.294092	6.28082	-9.44203	2.28e-20	1.11e-18	35.464
H2AFZ	0.236247	10.0687	7.27227	6.89e-13	3.36e-11	18.7272		FAM20C	-0.522082	5.76784	-11.4625	9.57e-29	4.66e-27	54.4122		MARS2	0.402239	5.60119	9.43585	2.41e-20	1.17e-18	35.4106
CDCA5	0.47075	7.33757	7.27065	6.97e-13	3.38e-11	18.7162		RECQL4	0.644278	5.8442	11.4583	9.99e-29	4.85e-27	54.3699		DR1	0.370036	6.74749	9.4102	3.01e-20	1.46e-18	35.1895
CCNF	0.402098	6.33749	7.26948	7.03e-13	3.4e-11	18.7082		MED30	0.477075	7.13925	11.4503	1.08e-28	5.25e-27	54.2886		SRGN	0.712558	8.42722	9.40452	3.17e-20	1.53e-18	35.1406
MXRA7	-0.466207	6.85225	-7.26679	7.17e-13	3.45e-11	18.6898		LDB2	-0.680174	6.62611	-11.4473	1.12e-28	5.4e-27	54.2575		POMP	0.324293	9.09132	9.40374	3.19e-20	1.53e-18	35.1339
MSX2	0.394461	4.96482	7.26073	7.48e-13	3.59e-11	18.6485		WRNIP1	0.384849	6.82418	11.4456	1.14e-28	5.47e-27	54.2403		BRPF1	-0.323366	7.13284	-9.3968	3.39e-20	1.62e-18	35.0741
ZAN	0.192196	4.14272	7.25568	7.75e-13	3.71e-11	18.6141		EBF1	-0.751439	5.76303	-11.4302	1.33e-28	6.38e-27	54.0852		NEK8	-0.453256	5.57506	-9.39639	3.4e-20	1.62e-18	35.0706
RCC1	0.268623	5.71649	7.24128	8.57e-13	4.09e-11	18.5161		LHFP	-0.869911	6.88293	-11.4255	1.4e-28	6.66e-27	54.038		YTHDF3	0.308242	7.34014	9.39165	3.55e-20	1.69e-18	35.0299
NR2F1	-0.64874	6.70957	-7.23037	9.26e-13	4.41e-11	18.442		SPAG5	0.667525	6.09872	11.4255	1.4e-28	6.66e-27	54.0376		PCGF6	0.36972	6.22479	9.38454	3.77e-20	1.79e-18	34.9688
ITPA	0.251887	7.89459	7.21832	1.01e-12	4.78e-11	18.3602		EARS2	0.360567	6.12422	11.4083	1.67e-28	7.92e-27	53.8636		ATG2A	-0.356706	6.82214	-9.38286	3.83e-20	1.81e-18	34.9544
TSHZ3	-0.454882	6.24082	-7.21561	1.03e-12	4.85e-11	18.3419		RAD21	0.462955	8.27934	11.4046	1.73e-28	8.19e-27	53.8265		UNC45A	-0.28138	6.64357	-9.38126	3.89e-20	1.83e-18	34.9406
KIF11	0.443424	6.86308	7.2141	1.04e-12	4.89e-11	18.3316		MCM7	0.51833	7.91713	11.4032	1.76e-28	8.28e-27	53.8126		ZNF446	-0.3505	5.57918	-9.3809	3.9e-20	1.83e-18	34.9375
PIGU	0.32507	7.31092	7.21019	1.07e-12	5.01e-11	18.3051		ZBTB4	-0.496529	7.65363	-11.3995	1.82e-28	8.57e-27	53.7755		PGM3	0.450934	6.6245	9.37701	4.03e-20	1.89e-18	34.9041
NUP37	0.250275	7.89133	7.20883	1.08e-12	5.04e-11	18.2959		SPON1	-1.17886	7.09324	-11.3975	1.86e-28	8.73e-27	53.7549		NCKAP1	0.471015	7.28528	9.37592	4.07e-20	1.9e-18	34.8947
UBE2C	0.579799	8.16371	7.20445	1.11e-12	5.18e-11	18.2663		EXOSC4	0.450415	7.08112	11.3923	1.96e-28	9.18e-27	53.7022		ARHGEF17	-0.574005	5.81667	-9.34551	5.31e-20	2.47e-18	34.6341
JAM3	-0.501161	6.77667	-7.20338	1.12e-12	5.21e-11	18.259		OLFML1	-0.779234	5.98696	-11.3864	2.09e-28	9.72e-27	53.6426		CDC42BPB	-0.364881	6.22701	-9.34358	5.4e-20	2.51e-18	34.6176
SYDE1	-0.304734	5.63521	-7.20148	1.13e-12	5.26e-11	18.2461		HPRT1	0.394988	7.61968	11.3782	2.27e-28	1.05e-26	53.5605		MNT	-0.328258	6.65754	-9.34107	5.52e-20	2.55e-18	34.596
PPP1R3C	-0.703864	5.85085	-7.19459	1.19e-12	5.5e-11	18.1995		CYB5R3	-0.385482	8.80457	-11.3702	2.46e-28	1.14e-26	53.4796		CTR9	0.323251	6.94562	9.33586	5.78e-20	2.66e-18	34.5515
MYH9	-0.229077	8.99992	-7.19339	1.2e-12	5.53e-11	18.1914		FSTL1	-0.762928	7.78921	-11.3574	2.81e-28	1.29e-26	53.3506		MYO9A	-0.432761	6.2221	-9.33154	6e-20	2.76e-18	34.5146
MPHOSPH6	0.280251	6.23336	7.19285	1.2e-12	5.53e-11	18.1878		C1QBP	0.504378	9.00565	11.3525	2.95e-28	1.36e-26	53.3012		RNGTT	0.31322	6.6412	9.33037	6.06e-20	2.78e-18	34.5046
POMP	0.222628	9.09132	7.18508	1.27e-12	5.83e-11	18.1353		TOMM34	0.522479	7.91476	11.3506	3.01e-28	1.38e-26	53.2822		YEATS4	0.562181	6.79462	9.32554	6.32e-20	2.89e-18	34.4633
ZNF92	0.167825	4.78961	7.17683	1.35e-12	6.15e-11	18.0796		RUVBL1	0.519954	6.85977	11.3442	3.21e-28	1.47e-26	53.2185		ZNF324	-0.555147	5.66309	-9.32518	6.34e-20	2.89e-18	34.4602
GLT1D1	0.369712	4.58933	7.16858	1.43e-12	6.49e-11	18.024		MAMDC2	-1.33573	5.36364	-11.3398	3.35e-28	1.53e-26	53.1744		DIP2C	-0.523523	6.19894	-9.31905	6.69e-20	3.04e-18	34.4078
LAMA2	-0.420319	5.52535	-7.16818	1.43e-12	6.49e-11	18.0213		ANK2	-0.715675	4.76188	-11.336	3.49e-28	1.58e-26	53.1363		MAN2C1	-0.342281	6.04864	-9.31269	7.07e-20	3.2e-18	34.3535
FOXF1	-0.538052	6.91615	-7.16501	1.46e-12	6.62e-11	17.9999		DENND2A	-0.624591	5.43176	-11.3203	4.09e-28	1.85e-26	52.9783		RB1	0.455408	6.4644	9.31051	7.2e-20	3.25e-18	34.335
GPR124	-0.374972	6.27302	-7.16201	1.49e-12	6.73e-11	17.9797		SPARCL1	-1.11803	9.47265	-11.3114	4.48e-28	2.02e-26	52.8894		TLR1	0.56042	5.45315	9.30811	7.35e-20	3.31e-18	34.3145
GFER	0.307685	5.2044	7.16167	1.5e-12	6.73e-11	17.9775		ZNF367	0.521739	5.5852	11.3107	4.51e-28	2.03e-26	52.8821		LYSMD3	0.284565	6.0838	9.3058	7.5e-20	3.37e-18	34.2947
XRN2	0.291455	6.80825	7.16086	1.5e-12	6.75e-11	17.972		NUP98	0.309911	6.01868	11.3074	4.66e-28	2.09e-26	52.8492		SLC30A5	0.270442	6.79596	9.30209	7.75e-20	3.47e-18	34.2631
ZBTB4	-0.307802	7.65363	-7.15991	1.51e-12	6.75e-11	17.9656		FEZ1	-0.665906	5.97619	-11.2969	5.19e-28	2.32e-26	52.7437		RANBP1	0.394664	7.81636	9.29404	8.31e-20	3.71e-18	34.1945
IGFBP6	-0.546979	6.97461	-7.15988	1.51e-12	6.75e-11	17.9654		NOC3L	0.40456	7.75642	11.2879	5.69e-28	2.54e-26	52.6538		PPM1D	0.380455	6.31741	9.2872	8.82e-20	3.92e-18	34.1362
GABARAPL1	-0.381734	6.79604	-7.15964	1.52e-12	6.75e-11	17.9638		ROR2	-0.873616	5.47058	-11.286	5.8e-28	2.58e-26	52.6348		CXCL11	1.14511	5.91277	9.27843	9.52e-20	4.22e-18	34.0616
TRPC1	-0.447233	5.31114	-7.15183	1.6e-12	7.1e-11	17.9113		PSMC3IP	0.340658	5.44071	11.2846	5.88e-28	2.61e-26	52.6203		ABCE1	0.329588	7.83539	9.2742	9.87e-20	4.37e-18	34.0256
PMP22	-0.43926	7.01359	-7.15133	1.61e-12	7.11e-11	17.9079		RRM2	0.841165	7.22488	11.2803	6.14e-28	2.72e-26	52.5779		SMNDC1	0.388887	8.05757	9.27156	1.01e-19	4.45e-18	34.0032
ADRB2	-0.451547	5.5083	-7.14728	1.65e-12	7.29e-11	17.8806		PDSS1	0.547229	6.3704	11.2775	6.32e-28	2.79e-26	52.5491		SLC35F5	0.421293	6.49537	9.26745	1.05e-19	4.6e-18	33.9682
RFC4	0.319573	7.60439	7.14544	1.67e-12	7.36e-11	17.8683		FILIP1L	-0.72721	7.05668	-11.2763	6.4e-28	2.81e-26	52.5376		ZNF92	0.241185	4.78961	9.26697	1.05e-19	4.61e-18	33.9642
NEIL3	0.327434	4.87774	7.1386	1.76e-12	7.7e-11	17.8224		MRGPRF	-1.17469	6.27891	-11.2758	6.43e-28	2.82e-26	52.532		E2F5	0.645967	6.5536	9.26413	1.08e-19	4.71e-18	33.94
CCNB2	0.428472	6.91684	7.13317	1.82e-12	7.97e-11	17.7859		NUDT15	0.47118	7.04286	11.2749	6.49e-28	2.84e-26	52.5233		MIER3	0.305378	5.14125	9.26127	1.1e-19	4.81e-18	33.9157
JAM2	-0.553764	6.08446	-7.13107	1.85e-12	8.06e-11	17.7718		NOL11	0.35931	8.12298	11.2714	6.72e-28	2.93e-26	52.4884		RFC5	0.360407	6.76787	9.25827	1.13e-19	4.93e-18	33.8902
LIX1L	-0.34282	6.09134	-7.12774	1.89e-12	8.23e-11	17.7496		ECE2	0.391577	5.5239	11.2688	6.9e-28	3e-26	52.4627		RPA3	0.448941	8.65923	9.25765	1.14e-19	4.94e-18	33.885
SSBP2	-0.431212	5.66752	-7.1204	1.99e-12	8.63e-11	17.7004		TRIM8	-0.355571	7.62524	-11.266	7.1e-28	3.08e-26	52.4342		SHOC2	0.371917	7.22851	9.25428	1.17e-19	5.07e-18	33.8563
ARL5B	0.297729	6.40525	7.11468	2.07e-12	8.95e-11	17.662		PPAP2A	-0.609266	7.41696	-11.2566	7.81e-28	3.37e-26	52.341		PLRG1	0.270232	7.52355	9.24925	1.23e-19	5.28e-18	33.8137
KIF4A	0.458213	6.17118	7.10885	2.16e-12	9.29e-11	17.623		UMPS	0.306465	5.573	11.2504	8.32e-28	3.58e-26	52.2782		MTMR6	0.459582	6.97234	9.24416	1.28e-19	5.5e-18	33.7705
MXRA8	-0.429301	6.21183	-7.10788	2.17e-12	9.33e-11	17.6166		EIF2S2	0.396131	7.20231	11.2464	8.66e-28	3.72e-26	52.2385		NAE1	0.305796	8.21131	9.24385	1.28e-19	5.5e-18	33.7678
PAICS	0.295907	7.75427	7.10656	2.19e-12	9.39e-11	17.6078		POLR1C	0.479959	7.41902	11.2447	8.81e-28	3.77e-26	52.2222		VPS39	-0.285252	6.34412	-9.23719	1.36e-19	5.81e-18	33.7113
CCNI	-0.212189	9.63159	-7.10315	2.24e-12	9.56e-11	17.585		CAPRIN1	0.295855	7.13552	11.2364	9.58e-28	4.09e-26	52.1392		EED	0.344913	6.23885	9.23603	1.37e-19	5.85e-18	33.7015
YPEL5	-0.275606	8.47499	-7.10307	2.25e-12	9.56e-11	17.5844		MRPS22	0.326528	8.24407	11.229	1.03e-27	4.4e-26	52.0653		RPA4	-0.602499	4.65432	-9.22237	1.55e-19	6.56e-18	33.5858
FANCA	0.191214	4.80334	7.09854	2.32e-12	9.84e-11	17.5542		FOXM1	0.806937	6.29827	11.2145	1.2e-27	5.08e-26	51.9203		ACTN4	-0.481446	8.54075	-9.22133	1.56e-19	6.61e-18	33.577
NCAPD3	0.304512	6.4938	7.09637	2.35e-12	9.96e-11	17.5397		GINS4	0.499922	4.97892	11.2122	1.22e-27	5.18e-26	51.898		MRPL15	0.47005	8.68465	9.2192	1.59e-19	6.71e-18	33.559
TPST1	-0.392313	6.36639	-7.09398	2.39e-12	1.01e-10	17.5237		CDCA4	0.415233	6.60074	11.2094	1.26e-27	5.32e-26	51.8695		EXOC3	-0.431251	6.55468	-9.2127	1.68e-19	7.08e-18	33.504
CDC5L	0.249907	6.7623	7.09248	2.42e-12	1.02e-10	17.5137		CBX7	-0.678089	6.84103	-11.2089	1.26e-27	5.32e-26	51.8653		MINA	0.246492	5.8449	9.21026	1.72e-19	7.21e-18	33.4833
DDX21	0.326026	8.5309	7.08993	2.46e-12	1.03e-10	17.4967		PPIL1	0.499446	7.4709	11.2021	1.35e-27	5.69e-26	51.7969		PSMC6	0.338514	8.41264	9.19354	1.98e-19	8.3e-18	33.3421
SNRPF	0.27992	9.12118	7.08378	2.56e-12	1.07e-10	17.4557		UTP15	0.37367	5.46374	11.1988	1.4e-27	5.87e-26	51.764		PTOV1	-0.37152	7.98585	-9.19279	1.99e-19	8.33e-18	33.3358
MAPK10	-0.266746	4.79199	-7.08357	2.57e-12	1.07e-10	17.4543		HMBS	0.419038	6.8676	11.1948	1.46e-27	6.09e-26	51.7248		DPYD	0.626884	5.91644	9.18936	2.05e-19	8.56e-18	33.3068
PSMD14	0.263894	8.74695	7.08254	2.59e-12	1.08e-10	17.4474		TMEM100	-1.15463	5.664	-11.1916	1.51e-27	6.27e-26	51.6925		ZGPAT	-0.343277	6.57922	-9.18491	2.13e-19	8.86e-18	33.2692
POLA1	0.268329	6.52634	7.08095	2.62e-12	1.09e-10	17.4368		UCHL3	0.511086	8.20302	11.1878	1.56e-27	6.5e-26	51.6553		OTUD6B	0.387879	6.59078	9.1776	2.27e-19	9.41e-18	33.2076
EFHD1	-0.533861	6.13958	-7.07583	2.71e-12	1.12e-10	17.4027		C8orf76	0.428387	7.56079	11.1837	1.63e-27	6.75e-26	51.6144		HMGN2	0.366107	9.33764	9.17459	2.33e-19	9.63e-18	33.1823
AMMECR1	0.265677	5.99635	7.07561	2.71e-12	1.12e-10	17.4013		QTRTD1	0.334011	5.25767	11.1805	1.68e-27	6.96e-26	51.5824		UPF1	-0.311941	6.6447	-9.16994	2.43e-19	1e-17	33.143
BOC	-0.456238	5.3945	-7.07498	2.73e-12	1.12e-10	17.397		SDPR	-0.982665	6.3099	-11.1782	1.72e-27	7.1e-26	51.5597		HNMT	0.374698	6.4476	9.1659	2.51e-19	1.03e-17	33.109
SERP2	-0.387894	4.60199	-7.07201	2.78e-12	1.14e-10	17.3773		OTUD6B	0.429564	6.59078	11.165	1.97e-27	8.07e-26	51.428		TMEM126B	0.298588	7.89327	9.16327	2.57e-19	1.05e-17	33.0869
PDGFRA	-0.440743	6.74671	-7.07006	2.82e-12	1.15e-10	17.3643		IGFBP6	-0.863715	6.97461	-11.1587	2.1e-27	8.57e-26	51.3657		TIPIN	0.446902	6.00174	9.16324	2.57e-19	1.05e-17	33.0866
FYCO1	-0.324425	6.90867	-7.06904	2.84e-12	1.16e-10	17.3575		LPAR1	-0.6862	6.26421	-11.1539	2.2e-27	8.96e-26	51.3188		SEPN1	-0.430695	6.82097	-9.16129	2.61e-19	1.07e-17	33.0703
APOL4	0.252164	4.60723	7.05984	3.02e-12	1.23e-10	17.2963		SPATA5L1	0.38234	6.64783	11.1518	2.25e-27	9.14e-26	51.2972		EIF3B	-0.321097	8.35981	-9.15884	2.67e-19	1.08e-17	33.0496
ADHFE1	-0.342579	5.36383	-7.04591	3.33e-12	1.35e-10	17.2038		CDCA2	0.67329	5.92761	11.1486	2.32e-27	9.41e-26	51.2657		MNAT1	0.359108	6.06253	9.15276	2.81e-19	1.14e-17	32.9985
RAB5B	-0.211579	8.1798	-7.04499	3.35e-12	1.36e-10	17.1977		AEBP1	-0.996094	7.88789	-11.1399	2.53e-27	1.02e-25	51.1795		VPS37C	-0.276284	8.14115	-9.1462	2.98e-19	1.2e-17	32.9434
MAPRE2	-0.270678	7.25101	-7.0408	3.45e-12	1.39e-10	17.17		EMG1	0.411628	8.04878	11.1398	2.54e-27	1.02e-25	51.1782		FGFR1OP2	0.348894	5.99613	9.13866	3.17e-19	1.28e-17	32.8799
TASP1	0.234413	5.77429	7.0404	3.46e-12	1.39e-10	17.1673		CCDC34	0.552505	7.09606	11.1225	3.02e-27	1.21e-25	51.0072		FAM89B	-0.336015	7.19058	-9.13382	3.31e-19	1.33e-17	32.8393
MTMR9	-0.285654	6.50226	-7.03969	3.47e-12	1.4e-10	17.1627		GNG11	-0.729292	6.92409	-11.1222	3.03e-27	1.21e-25	51.0042		ATG4C	0.372526	5.94145	9.13092	3.39e-19	1.36e-17	32.815
RCAN2	-0.618987	7.10223	-7.03917	3.48e-12	1.4e-10	17.1592		RBM28	0.400176	6.6467	11.1199	3.1e-27	1.24e-25	50.9816		ZMYM6	0.309821	6.18609	9.12181	3.67e-19	1.47e-17	32.7386
ILF2	0.256157	9.04555	7.0368	3.54e-12	1.42e-10	17.1435		PUS7	0.498614	7.53786	11.1164	3.21e-27	1.28e-25	50.9468		BRD9	-0.358444	7.37105	-9.11964	3.74e-19	1.49e-17	32.7203
UTP15	0.231477	5.46374	7.02882	3.74e-12	1.49e-10	17.0906		DNAJC9	0.420563	7.62082	11.1153	3.24e-27	1.29e-25	50.9359		STAM2	0.277186	5.91187	9.11798	3.79e-19	1.51e-17	32.7064
SMARCD3	-0.306119	5.17341	-7.02536	3.83e-12	1.52e-10	17.0677		NAE1	0.334652	8.21131	11.1125	3.34e-27	1.32e-25	50.908		OSGIN2	0.35677	5.67811	9.11154	4e-19	1.59e-17	32.6524
MCM8	0.375643	6.84327	7.02297	3.89e-12	1.54e-10	17.0519		PSMA1	0.309435	8.87439	11.1102	3.41e-27	1.35e-25	50.8856		MST4	0.499569	7.18599	9.10209	4.34e-19	1.72e-17	32.5733
TMEM47	-0.549679	7.63652	-7.02223	3.91e-12	1.55e-10	17.047		TIMP2	-0.771493	8.26716	-11.0989	3.82e-27	1.51e-25	50.7738		TFEC	0.427077	4.53355	9.10069	4.39e-19	1.73e-17	32.5616
LIN9	0.286533	5.05054	7.01949	3.99e-12	1.57e-10	17.0289		LAMB2	-0.643917	7.02581	-11.0916	4.11e-27	1.62e-25	50.7017		FH	0.407435	8.36099	9.10011	4.41e-19	1.74e-17	32.5567
SPON1	-0.716548	7.09324	-7.01914	4e-12	1.57e-10	17.0266		GPR124	-0.587814	6.27302	-11.0811	4.57e-27	1.79e-25	50.5984		TRMT6	0.396323	6.1975	9.09953	4.44e-19	1.74e-17	32.5519
WDHD1	0.277687	4.95487	7.01236	4.19e-12	1.64e-10	16.9818		MAPK10	-0.422574	4.79199	-11.0755	4.83e-27	1.89e-25	50.5434		PSEN1	0.195913	5.27953	9.09548	4.59e-19	1.79e-17	32.518
CUEDC1	-0.393275	6.88197	-7.0121	4.19e-12	1.64e-10	16.9801		PKMYT1	0.529875	5.8923	11.0709	5.06e-27	1.98e-25	50.4973		COPS8	0.293803	6.61786	9.0954	4.6e-19	1.79e-17	32.5173
HSPA14	0.260241	7.10009	7.01038	4.24e-12	1.66e-10	16.9688		ADH1B	-1.24542	5.10096	-11.0689	5.16e-27	2.01e-25	50.4777		BCL2A1	0.710265	5.80984	9.09335	4.68e-19	1.82e-17	32.5002
PTGER3	-0.304035	4.52135	-7.00791	4.32e-12	1.68e-10	16.9524		SMC3	0.360739	7.02937	11.0657	5.33e-27	2.07e-25	50.4462		ST6GALNAC6	-0.605134	6.0134	-9.09043	4.79e-19	1.86e-17	32.4757
ZCCHC4	0.188245	4.49153	7.00633	4.36e-12	1.69e-10	16.942		MGLL	-0.654554	7.11759	-11.0605	5.61e-27	2.17e-25	50.3949		ABI1	0.272558	6.6986	9.07627	5.41e-19	2.1e-17	32.3574
CKS2	0.462144	8.81815	7.00465	4.41e-12	1.71e-10	16.9309		RARRES2	-0.877628	7.98883	-11.0563	5.85e-27	2.26e-25	50.3533		EXOSC9	0.379226	6.833	9.07205	5.61e-19	2.17e-17	32.3222
CSRP1	-0.518671	9.14435	-6.9984	4.6e-12	1.78e-10	16.8897		PRKD1	-0.652335	5.06023	-11.048	6.35e-27	2.45e-25	50.2724		ATP5F1	0.336106	8.87297	9.0614	6.14e-19	2.37e-17	32.2333
DCN	-0.564585	8.53843	-6.99238	4.8e-12	1.85e-10	16.85		CENPO	0.350778	5.15466	11.043	6.69e-27	2.57e-25	50.2223		MBNL2	0.471839	6.96203	9.056	6.43e-19	2.47e-17	32.1883
MPDZ	-0.487096	6.06732	-6.98847	4.93e-12	1.89e-10	16.8242		COL14A1	-0.912728	5.55629	-11.033	7.38e-27	2.83e-25	50.1247		HSPE1	0.428423	9.33695	9.05279	6.6e-19	2.53e-17	32.1616
NME1	0.306464	9.04539	6.98845	4.93e-12	1.89e-10	16.8241		RUNX1T1	-0.593393	4.76892	-11.0286	7.72e-27	2.95e-25	50.081		MRPL3	0.310775	9.2091	9.05017	6.75e-19	2.58e-17	32.1398
GMNN	0.403723	7.46219	6.98497	5.05e-12	1.93e-10	16.8012		MACF1	-0.416493	6.82272	-11.028	7.76e-27	2.96e-25	50.0752		ABCD3	0.394401	6.98017	9.04944	6.8e-19	2.59e-17	32.1336
ZBTB16	-0.518104	4.98895	-6.98441	5.07e-12	1.93e-10	16.7976		FCER1A	-0.943231	4.99273	-11.0221	8.23e-27	3.13e-25	50.0169		E4F1	-0.305697	7.01677	-9.03922	7.41e-19	2.82e-17	32.0486
MTBP	0.292445	4.42881	6.9745	5.42e-12	2.06e-10	16.7323		GLT8D2	-0.845273	6.63617	-11.0217	8.26e-27	3.14e-25	50.0132		PUS7L	0.323431	5.72002	9.03457	7.71e-19	2.93e-17	32.0099
MCM2	0.42745	7.34986	6.97204	5.51e-12	2.09e-10	16.7162		DBF4	0.408183	6.08305	11.0213	8.3e-27	3.14e-25	50.0091		MTA1	-0.347397	6.66799	-9.02505	8.36e-19	3.16e-17	31.9307
ZNF471	-0.338124	4.14285	-6.96691	5.71e-12	2.16e-10	16.6825		CFI	-0.511237	6.46004	-11.0083	9.44e-27	3.57e-25	49.8817		DUSP11	0.257022	7.37967	9.01891	8.8e-19	3.32e-17	31.8797
ABL1	-0.269483	7.20927	-6.96682	5.71e-12	2.16e-10	16.6819		SGCD	-0.565316	5.09396	-11.0078	9.49e-27	3.57e-25	49.8769		SH3GLB2	-0.332596	7.33147	-9.01785	8.88e-19	3.35e-17	31.8709
CYBRD1	-0.615594	7.74587	-6.96331	5.85e-12	2.2e-10	16.6589		ST6GALNAC6	-0.666777	6.0134	-11.0029	9.96e-27	3.74e-25	49.8291		ALG5	0.407141	7.44937	9.0144	9.15e-19	3.44e-17	31.8423
TNS1	-0.451675	6.18447	-6.96273	5.87e-12	2.2e-10	16.6551		FERMT2	-0.91835	7.85471	-11.0028	9.97e-27	3.74e-25	49.8279		P2RY10	0.480524	4.82768	9.00009	1.03e-18	3.87e-17	31.7236
CYGB	-0.372485	6.51947	-6.96261	5.87e-12	2.2e-10	16.6543		GINS3	0.465467	6.06504	10.9985	1.04e-26	3.89e-25	49.7856		EXOSC8	0.384918	7.83628	8.99841	1.05e-18	3.92e-17	31.7096
RGMA	-0.687955	6.53929	-6.95632	6.13e-12	2.29e-10	16.613		DAAM2	-0.746863	5.78324	-10.9975	1.05e-26	3.92e-25	49.7755		LRRC45	-0.499108	5.45793	-8.9941	1.09e-18	4.05e-17	31.6739
MYO1C	-0.25672	6.97757	-6.95493	6.19e-12	2.31e-10	16.6039		KLHL3	-0.625043	5.41914	-10.9895	1.14e-26	4.23e-25	49.6978		PIGF	0.395876	7.19388	8.99279	1.1e-18	4.09e-17	31.6631
RPE	0.219289	6.34212	6.94891	6.45e-12	2.4e-10	16.5645		CWF19L1	0.314139	7.16164	10.9847	1.19e-26	4.43e-25	49.6505		UCHL3	0.45106	8.20302	8.98857	1.14e-18	4.22e-17	31.6281
TENC1	-0.334487	5.46546	-6.94785	6.49e-12	2.41e-10	16.5575		TSHZ3	-0.701515	6.24082	-10.9829	1.22e-26	4.5e-25	49.633		CDC5L	0.352035	6.7623	8.9767	1.26e-18	4.65e-17	31.5299
C14orf28	-0.302666	5.84182	-6.94717	6.52e-12	2.41e-10	16.553		CLSPN	0.304888	4.23846	10.9788	1.27e-26	4.67e-25	49.5927		RAPGEF1	-0.306997	6.33469	-8.97669	1.26e-18	4.65e-17	31.5298
COL6A2	-0.559038	7.02598	-6.94285	6.72e-12	2.48e-10	16.5248		AHCY	0.512484	9.08894	10.9753	1.31e-26	4.83e-25	49.5579		EFCAB7	0.329762	5.41347	8.96394	1.4e-18	5.16e-17	31.4244
ZUFSP	0.205592	6.52982	6.94122	6.79e-12	2.5e-10	16.5141		LAMA2	-0.65176	5.52535	-10.9704	1.38e-26	5.05e-25	49.5108		UBA6	0.409078	6.50714	8.95644	1.49e-18	5.48e-17	31.3624
LTBP4	-0.380857	6.04381	-6.94041	6.83e-12	2.51e-10	16.5088		CSRP1	-0.823575	9.14435	-10.9677	1.41e-26	5.17e-25	49.4843		NCF2	0.583496	5.72717	8.95021	1.57e-18	5.77e-17	31.311
TAGLN	-0.661305	9.02927	-6.93958	6.87e-12	2.52e-10	16.5034		METTL5	0.406486	7.66882	10.9676	1.41e-26	5.17e-25	49.4828		USP38	0.353505	7.3011	8.94932	1.58e-18	5.79e-17	31.3037
MYO9A	-0.289076	6.2221	-6.93754	6.96e-12	2.55e-10	16.49		ACP1	0.448861	7.97096	10.9633	1.48e-26	5.38e-25	49.4411		ZUFSP	0.294638	6.52982	8.93777	1.75e-18	6.37e-17	31.2084
TIMM13	0.308818	5.60341	6.93102	7.28e-12	2.65e-10	16.4474		SLCO2A1	-0.842895	7.4101	-10.9537	1.62e-26	5.91e-25	49.3468		LMF2	-0.393461	7.24578	-8.93492	1.79e-18	6.51e-17	31.1849
C1orf74	0.224757	5.34436	6.93064	7.29e-12	2.65e-10	16.4449		PPIH	0.399426	7.80024	10.9461	1.75e-26	6.35e-25	49.2729		CLSPN	0.272485	4.23846	8.93226	1.83e-18	6.64e-17	31.163
CHST3	-0.385179	5.56597	-6.92953	7.35e-12	2.67e-10	16.4376		DEK	0.407234	9.2095	10.944	1.79e-26	6.47e-25	49.2523		CCDC130	-0.345519	7.43744	-8.93119	1.85e-18	6.68e-17	31.1542
TIMM8A	0.268241	5.29111	6.92676	7.49e-12	2.71e-10	16.4196		NKX2-3	-0.757403	4.65767	-10.9402	1.86e-26	6.7e-25	49.2155		TRMT61A	-0.316465	5.96491	-8.9245	1.95e-18	7.05e-17	31.0991
MAMDC2	-0.80442	5.36364	-6.91931	7.88e-12	2.84e-10	16.3709		GLRX2	0.343753	6.88237	10.9374	1.91e-26	6.88e-25	49.1874		CASP8	0.237359	5.40614	8.92047	2.02e-18	7.28e-17	31.0659
SVEP1	-0.490302	5.60203	-6.91517	8.1e-12	2.92e-10	16.3439		PPP1R3C	-1.08313	5.85085	-10.9271	2.11e-26	7.6e-25	49.0873		CHD4	-0.296598	7.80119	-8.9159	2.1e-18	7.54e-17	31.0284
KCNK9	0.302906	4.35622	6.91055	8.35e-12	3e-10	16.3138		ACTA2	-0.785403	9.41142	-10.9259	2.14e-26	7.67e-25	49.0758		RCN2	0.423326	7.97418	8.91494	2.12e-18	7.59e-17	31.0205
UBA6	0.283584	6.50714	6.91033	8.37e-12	3e-10	16.3124		DHX9	0.336492	6.15709	10.9204	2.26e-26	8.08e-25	49.0221		AHDC1	-0.356292	4.92371	-8.91295	2.15e-18	7.7e-17	31.0041
SYNCRIP	0.216455	7.90649	6.90966	8.4e-12	3.01e-10	16.308		RBM45	0.267752	6.12526	10.92	2.27e-26	8.09e-25	49.0181		LOC441124	-0.520388	5.09273	-8.91268	2.16e-18	7.7e-17	31.0019
CRYAB	-0.707633	6.66264	-6.90911	8.44e-12	3.01e-10	16.3044		NCAPG2	0.608898	6.31883	10.9176	2.32e-26	8.27e-25	48.9945		SHC1	-0.310828	7.86893	-8.90228	2.35e-18	8.38e-17	30.9164
FBLN1	-0.663675	7.23173	-6.90584	8.62e-12	3.07e-10	16.2832		FYCO1	-0.507643	6.90867	-10.9172	2.33e-26	8.28e-25	48.9905		RAN	0.344011	8.35495	8.89673	2.46e-18	8.75e-17	30.8709
SCML1	0.388245	6.29538	6.90199	8.85e-12	3.14e-10	16.2581		CLP1	0.249666	6.37883	10.9141	2.4e-26	8.52e-25	48.9605		ZDHHC8	-0.369196	7.32504	-8.89276	2.55e-18	9.03e-17	30.8383
RRP15	0.259752	6.85449	6.89693	9.16e-12	3.25e-10	16.2251		TYMS	0.713229	7.46199	10.9137	2.41e-26	8.53e-25	48.9563		ABCC4	0.536459	5.81403	8.89138	2.58e-18	9.11e-17	30.827
MRC2	-0.270718	5.9481	-6.89105	9.53e-12	3.37e-10	16.1869		CLEC14A	-0.688873	6.66448	-10.9107	2.49e-26	8.76e-25	48.927		NOC3L	0.349417	7.75642	8.87523	2.95e-18	1.04e-16	30.6946
KLHDC1	-0.216941	4.3739	-6.88878	9.67e-12	3.41e-10	16.1721		MKI67	0.576907	5.96294	10.9105	2.49e-26	8.76e-25	48.9254		NARFL	-0.31244	6.10739	-8.87523	2.95e-18	1.04e-16	30.6945
C1orf123	-0.230712	7.75291	-6.8836	1e-11	3.53e-10	16.1385		COL4A5	-0.945338	5.77766	-10.9084	2.54e-26	8.93e-25	48.9049		ATP2C1	0.355668	6.81769	8.87461	2.97e-18	1.04e-16	30.6894
BYSL	0.304685	6.94958	6.88098	1.02e-11	3.58e-10	16.1215		GLI3	-0.478402	5.12023	-10.8947	2.91e-26	1.02e-24	48.7715		THAP1	0.306694	6.01842	8.8704	3.07e-18	1.08e-16	30.6549
SPAG5	0.396722	6.09872	6.87999	1.03e-11	3.59e-10	16.115		FZD4	-0.548211	6.47428	-10.8921	2.99e-26	1.04e-24	48.7458		HNRNPF	0.323301	7.13814	8.86699	3.16e-18	1.1e-16	30.6271
ANP32E	0.240739	6.2474	6.87572	1.06e-11	3.69e-10	16.0873		PTGS1	-0.601006	6.09469	-10.8799	3.37e-26	1.17e-24	48.6278		GNA13	0.304916	7.54107	8.85356	3.54e-18	1.23e-16	30.5172
MCM6	0.256122	8.05256	6.87401	1.07e-11	3.72e-10	16.0762		DCN	-0.889846	8.53843	-10.8772	3.46e-26	1.2e-24	48.6014		KRTCAP2	-0.304744	8.8061	-8.85213	3.58e-18	1.24e-16	30.5055
FZD4	-0.341385	6.47428	-6.87226	1.08e-11	3.75e-10	16.0649		C7	-1.48447	5.91862	-10.8746	3.55e-26	1.23e-24	48.5759		APOL4	0.351878	4.60723	8.85148	3.6e-18	1.25e-16	30.5002
RBPMS2	-0.825359	6.69975	-6.87215	1.08e-11	3.75e-10	16.0642		RCAN2	-0.968043	7.10223	-10.8653	3.89e-26	1.35e-24	48.4856		PTPN22	0.422243	4.87798	8.85057	3.62e-18	1.25e-16	30.4928
HJURP	0.487157	6.41011	6.86763	1.11e-11	3.86e-10	16.0349		FHL1	-1.28311	7.09304	-10.8613	4.04e-26	1.4e-24	48.4468		PHF2	-0.252098	6.06233	-8.84663	3.75e-18	1.29e-16	30.4606
SLC4A1AP	0.180527	6.37272	6.86553	1.13e-11	3.91e-10	16.0213		C14orf132	-0.973008	5.98995	-10.852	4.43e-26	1.53e-24	48.3567		CCNG2	0.354477	6.40943	8.84166	3.9e-18	1.35e-16	30.42
FGD5	-0.342384	6.10178	-6.8598	1.18e-11	4.05e-10	15.9842		NUP107	0.442709	7.93432	10.8432	4.84e-26	1.66e-24	48.2708		HDAC2	0.353781	8.12674	8.83888	4e-18	1.37e-16	30.3972
ALG6	0.220175	7.30246	6.85805	1.19e-11	4.09e-10	15.9728		IQSEC1	-0.368283	6.49294	-10.8413	4.93e-26	1.69e-24	48.2525		SUPT5H	-0.336822	7.63166	-8.8308	4.27e-18	1.47e-16	30.3313
CDT1	0.448802	6.23486	6.85238	1.23e-11	4.24e-10	15.9362		PRC1	0.754166	7.88958	10.8408	4.95e-26	1.69e-24	48.2477		LSM5	0.339217	8.18734	8.82682	4.42e-18	1.51e-16	30.2989
UBE2S	0.308309	6.04798	6.85124	1.24e-11	4.26e-10	15.9288		FASTKD5	0.394386	7.18968	10.839	5.04e-26	1.72e-24	48.2299		WRB	0.386383	7.40745	8.82382	4.53e-18	1.55e-16	30.2745
RNGTT	0.206593	6.6412	6.84943	1.26e-11	4.3e-10	15.9171		CSNK2A1	0.410568	6.72329	10.8377	5.1e-26	1.74e-24	48.2179		MCFD2	0.304114	6.63477	8.81917	4.71e-18	1.6e-16	30.2365
RECQL4	0.3795	5.8442	6.83839	1.36e-11	4.62e-10	15.8458		SLIT3	-0.727871	5.11991	-10.8333	5.33e-26	1.81e-24	48.1748		TAZ	-0.309	5.79791	-8.81323	4.95e-18	1.68e-16	30.1882
SGCE	-0.562958	7.33851	-6.83812	1.36e-11	4.62e-10	15.844		VWF	-0.661711	7.94487	-10.8312	5.44e-26	1.84e-24	48.1551		LDLRAP1	-0.343209	6.02023	-8.81144	5.02e-18	1.7e-16	30.1736
ADH1B	-0.759292	5.10096	-6.83737	1.37e-11	4.63e-10	15.8392		COPZ2	-0.530795	5.57343	-10.8312	5.44e-26	1.84e-24	48.1549		SAMSN1	0.559734	5.93244	8.81091	5.04e-18	1.7e-16	30.1693
RPP40	0.311322	7.48839	6.83101	1.42e-11	4.82e-10	15.7981		KARS	0.287668	8.59236	10.8295	5.53e-26	1.87e-24	48.1386		LZTS2	-0.313419	5.82779	-8.81063	5.05e-18	1.7e-16	30.167
MYBBP1A	0.197064	5.69572	6.82586	1.47e-11	4.98e-10	15.765		COL6A2	-0.882938	7.02598	-10.8227	5.92e-26	1.99e-24	48.0719		CHCHD3	0.345899	6.57354	8.808	5.17e-18	1.74e-16	30.1456
PDLIM3	-0.692546	6.9907	-6.82489	1.48e-11	5e-10	15.7587		PDGFRB	-0.710168	7.6894	-10.8189	6.14e-26	2.06e-24	48.0353		ATP6AP2	0.295027	8.81572	8.80514	5.29e-18	1.77e-16	30.1223
SART3	0.163497	6.06508	6.82188	1.51e-11	5.09e-10	15.7393		ANKRD35	-0.717255	5.52164	-10.8136	6.47e-26	2.17e-24	47.984		SRP9	0.275014	9.8338	8.80213	5.42e-18	1.81e-16	30.0979
HSPE1	0.289661	9.33695	6.81222	1.61e-11	5.42e-10	15.6771		TAGLN	-1.04385	9.02927	-10.8112	6.62e-26	2.21e-24	47.9613		CTTNBP2NL	0.296993	6.10398	8.79762	5.63e-18	1.88e-16	30.0611
TOPBP1	0.291063	7.48153	6.80894	1.65e-11	5.52e-10	15.6561		EXOSC2	0.390931	6.05302	10.8095	6.73e-26	2.25e-24	47.9444		ITGB3BP	0.406331	6.92583	8.79376	5.81e-18	1.94e-16	30.0297
UCHL5	0.247188	6.42358	6.80398	1.71e-11	5.7e-10	15.6242		PDCD2L	0.519009	6.81665	10.8092	6.75e-26	2.25e-24	47.9413		XRCC4	0.354587	5.01063	8.78219	6.4e-18	2.13e-16	29.9358
RASL12	-0.412914	6.09263	-6.8031	1.72e-11	5.72e-10	15.6185		CXCL12	-0.994396	6.36925	-10.8034	7.14e-26	2.37e-24	47.886		APOL6	0.393698	5.613	8.78061	6.48e-18	2.15e-16	29.923
ABCA6	-0.437669	4.7795	-6.79716	1.78e-11	5.93e-10	15.5804		GPSM2	0.561658	6.67966	10.8015	7.28e-26	2.41e-24	47.867		EPSTI1	0.695145	8.13407	8.77348	6.88e-18	2.28e-16	29.8651
TCF4	-0.395761	7.28465	-6.79556	1.8e-11	5.98e-10	15.5701		HAT1	0.475019	7.5632	10.8013	7.29e-26	2.41e-24	47.8654		CASP1	0.761407	7.57045	8.77208	6.96e-18	2.3e-16	29.8537
PRMT2	-0.206532	6.39254	-6.79113	1.86e-11	6.15e-10	15.5417		PTGIS	-0.927452	5.62212	-10.7992	7.45e-26	2.46e-24	47.8447		TIMM17A	0.246511	6.10533	8.76857	7.16e-18	2.36e-16	29.8253
NIP7	0.263617	7.47885	6.79005	1.87e-11	6.18e-10	15.5347		CDH5	-0.625672	6.67639	-10.7961	7.68e-26	2.53e-24	47.8148		FARP1	-0.441456	6.1071	-8.76341	7.47e-18	2.46e-16	29.7835
CDCA2	0.403802	5.92761	6.77452	2.07e-11	6.83e-10	15.4353		KCNT2	-0.566606	4.45899	-10.7943	7.82e-26	2.57e-24	47.7972		GRIPAP1	-0.563208	6.81431	-8.76041	7.66e-18	2.51e-16	29.7592
RBBP9	0.213639	5.87381	6.76972	2.14e-11	7.04e-10	15.4045		THNSL1	0.484483	5.64532	10.7917	8.02e-26	2.63e-24	47.7724		NFE2L1	-0.293735	8.06126	-8.76023	7.67e-18	2.51e-16	29.7577
ZNF25	-0.335092	6.31305	-6.76776	2.17e-11	7.12e-10	15.392		KANK2	-0.72676	6.29744	-10.7907	8.1e-26	2.65e-24	47.7626		CD46	0.382192	8.26822	8.75893	7.76e-18	2.53e-16	29.7472
ZSCAN18	-0.506971	6.48545	-6.76659	2.19e-11	7.15e-10	15.3845		TRPC1	-0.683595	5.31114	-10.7892	8.21e-26	2.68e-24	47.7483		CDC42BPA	-0.377929	6.16908	-8.75808	7.81e-18	2.55e-16	29.7403
GSG2	0.327097	4.91535	6.76629	2.19e-11	7.15e-10	15.3826		MAN1C1	-0.706966	6.05933	-10.7851	8.55e-26	2.79e-24	47.7088		RIOK2	0.307063	6.69587	8.75391	8.09e-18	2.63e-16	29.7065
TERF2IP	-0.207599	7.69524	-6.75632	2.34e-11	7.63e-10	15.3189		MTBP	0.458132	4.42881	10.7837	8.67e-26	2.82e-24	47.6951		SNX4	0.342309	7.55727	8.75218	8.2e-18	2.66e-16	29.6925
VTI1A	0.169968	4.94418	6.75126	2.42e-11	7.87e-10	15.2866		CYYR1	-0.678797	6.37002	-10.7833	8.7e-26	2.82e-24	47.6914		CCDC12	-0.305064	8.06258	-8.75199	8.21e-18	2.66e-16	29.691
EIF4E	0.221134	5.843	6.75062	2.43e-11	7.88e-10	15.2825		MRPL48	0.471486	7.38703	10.7828	8.74e-26	2.83e-24	47.6867		CBFA2T2	-0.293085	5.49739	-8.74052	9.03e-18	2.92e-16	29.5982
RBM34	0.389093	5.37623	6.74948	2.45e-11	7.93e-10	15.2752		DARS2	0.543442	6.55765	10.7762	9.33e-26	3.01e-24	47.6229		MBD6	-0.356983	6.96078	-8.73818	9.21e-18	2.97e-16	29.5793
MGP	-0.802956	8.4134	-6.74857	2.46e-11	7.96e-10	15.2694		TMEM68	0.36613	5.65796	10.7531	1.17e-25	3.77e-24	47.4003		MAP1LC3A	-0.475737	7.05146	-8.7376	9.25e-18	2.98e-16	29.5746
LHFP	-0.506715	6.88293	-6.74308	2.55e-11	8.22e-10	15.2345		TTC27	0.331769	6.79259	10.7505	1.2e-25	3.86e-24	47.3755		ZBTB17	-0.282833	6.104	-8.73351	9.57e-18	3.07e-16	29.5416
ZMAT1	-0.228536	4.19681	-6.74295	2.56e-11	8.22e-10	15.2337		TNS1	-0.706576	6.18447	-10.7503	1.2e-25	3.86e-24	47.3729		ESCO2	0.392861	4.56381	8.72391	1.04e-17	3.32e-16	29.4641
RPN2	0.295	9.26204	6.73841	2.63e-11	8.45e-10	15.2047		FXYD6	-0.884666	6.28587	-10.7473	1.24e-25	3.97e-24	47.3438		PTP4A1	0.420864	7.04778	8.71994	1.07e-17	3.42e-16	29.432
ACACB	-0.398323	6.36444	-6.73701	2.66e-11	8.51e-10	15.1958		RAE1	0.452711	7.06666	10.7454	1.26e-25	4.02e-24	47.3261		INTS3	-0.280989	6.95256	-8.71595	1.11e-17	3.53e-16	29.3998
NR1H2	-0.288688	6.54564	-6.72586	2.86e-11	9.14e-10	15.1249		CLN6	0.351164	5.27267	10.7453	1.26e-25	4.02e-24	47.3253		ADCY6	-0.345944	6.54569	-8.71505	1.11e-17	3.55e-16	29.3926
NUP35	0.247167	6.88689	6.70595	3.26e-11	1.04e-09	14.9985		CPE	-1.08832	6.8931	-10.7389	1.34e-25	4.27e-24	47.2639		TAF1A	0.378268	5.315	8.71321	1.13e-17	3.59e-16	29.3777
NUP107	0.270109	7.93432	6.70303	3.32e-11	1.06e-09	14.9799		EFEMP1	-0.988161	6.74506	-10.7239	1.55e-25	4.94e-24	47.1196		TFB2M	0.371821	6.61048	8.71041	1.16e-17	3.67e-16	29.3551
RDM1	0.365658	4.82692	6.6992	3.41e-11	1.08e-09	14.9557		TMEM209	0.360157	6.71398	10.7211	1.6e-25	5.06e-24	47.0927		RECQL	0.317034	6.99614	8.70945	1.17e-17	3.69e-16	29.3474
PTGES3	0.275572	9.49633	6.69768	3.44e-11	1.09e-09	14.946		ADK	0.434602	6.45881	10.7203	1.61e-25	5.09e-24	47.0846		VRK1	0.427781	6.88181	8.70851	1.18e-17	3.71e-16	29.3398
SGCD	-0.339447	5.09396	-6.69691	3.46e-11	1.09e-09	14.9411		MEG3	-0.665166	5.17496	-10.7167	1.67e-25	5.26e-24	47.0501		ING1	0.275392	5.8436	8.70758	1.18e-17	3.73e-16	29.3323
HIC1	-0.28855	4.95188	-6.6815	3.83e-11	1.21e-09	14.8437		SEC31A	-0.360062	8.37812	-10.7152	1.69e-25	5.33e-24	47.0356		PRDM2	-0.18309	5.25075	-8.70533	1.21e-17	3.79e-16	29.3142
POLR3F	0.282166	6.07401	6.67992	3.87e-11	1.22e-09	14.8337		ATP8B2	-0.472678	5.79842	-10.71	1.78e-25	5.59e-24	46.9857		MRPS28	0.408799	7.68611	8.70338	1.23e-17	3.85e-16	29.2985
PLK1	0.338896	5.8549	6.67906	3.89e-11	1.22e-09	14.8282		CH25H	-0.915725	5.99583	-10.7076	1.82e-25	5.71e-24	46.9628		IFIH1	0.477521	6.42246	8.69756	1.29e-17	4.03e-16	29.2516
CHRDL1	-0.650175	5.20104	-6.67844	3.91e-11	1.22e-09	14.8244		TCEAL3	-0.745632	7.59932	-10.7031	1.9e-25	5.96e-24	46.9196		CAPRIN1	0.251503	7.13552	8.69555	1.31e-17	4.08e-16	29.2354
OLFML1	-0.45093	5.98696	-6.67605	3.97e-11	1.24e-09	14.8092		PCDH18	-0.620625	6.68562	-10.6954	2.05e-25	6.41e-24	46.8453		DLD	0.465163	7.69917	8.69412	1.32e-17	4.12e-16	29.2239
NXT1	0.222238	8.10607	6.67581	3.97e-11	1.24e-09	14.8077		PIP5K1C	-0.479245	6.83508	-10.6912	2.14e-25	6.66e-24	46.8056		MICAL1	-0.505412	6.71715	-8.68519	1.42e-17	4.43e-16	29.1521
CRIP2	-0.456447	7.12614	-6.67398	4.02e-11	1.25e-09	14.7961		FANCA	0.291701	4.80334	10.688	2.21e-25	6.86e-24	46.7743		GTF3C3	0.276578	6.56197	8.67922	1.5e-17	4.64e-16	29.1041
ACTR5	0.219878	6.38701	6.67252	4.06e-11	1.26e-09	14.787		TMEM38B	0.539287	6.42732	10.6858	2.25e-25	7e-24	46.7531		RFX2	-0.303205	4.94747	-8.67484	1.55e-17	4.8e-16	29.069
SPAST	0.21425	6.24542	6.67201	4.07e-11	1.26e-09	14.7837		RHOJ	-0.627183	5.57265	-10.6694	2.64e-25	8.18e-24	46.5965		COPS2	0.358953	6.7289	8.67274	1.58e-17	4.87e-16	29.0521
PRMT5	0.216358	7.28993	6.67163	4.08e-11	1.26e-09	14.7813		C10orf2	0.435069	5.89153	10.6682	2.67e-25	8.26e-24	46.585		C11orf58	0.296064	6.2816	8.6635	1.7e-17	5.25e-16	28.9779
CERK	-0.272941	7.30555	-6.67097	4.1e-11	1.27e-09	14.7771		WDR76	0.363561	4.73924	10.6676	2.69e-25	8.29e-24	46.5796		SARM1	-0.347386	5.23997	-8.66201	1.72e-17	5.3e-16	28.9659
MAP1LC3A	-0.326238	7.05146	-6.66881	4.16e-11	1.28e-09	14.7636		RQCD1	0.389994	6.30413	10.6634	2.8e-25	8.62e-24	46.5387		EAF2	0.445112	5.23852	8.66116	1.73e-17	5.33e-16	28.9591
CEP55	0.485924	7.44742	6.66653	4.22e-11	1.3e-09	14.7491		RNF150	-0.906704	5.64053	-10.6511	3.15e-25	9.69e-24	46.4215		ARMCX4	-0.317672	4.50057	-8.65341	1.85e-17	5.66e-16	28.897
PTTG1	0.436351	8.39592	6.66583	4.24e-11	1.3e-09	14.7447		DTYMK	0.276298	5.09808	10.6467	3.29e-25	1.01e-23	46.3788		ST5	-0.406585	6.50577	-8.65289	1.86e-17	5.68e-16	28.8928
SCN5A	0.282196	4.5076	6.6647	4.27e-11	1.31e-09	14.7376		ZNF485	0.406285	4.807	10.6417	3.46e-25	1.06e-23	46.3314		ZNF184	0.3123	5.91392	8.65167	1.87e-17	5.72e-16	28.883
MRAS	-0.289554	5.4376	-6.6637	4.3e-11	1.31e-09	14.7313		NAP1L3	-0.873014	5.04154	-10.6369	3.62e-25	1.11e-23	46.2859		GBP1	0.698025	7.59886	8.65074	1.89e-17	5.75e-16	28.8756
SORD	0.402914	6.47586	6.6636	4.3e-11	1.31e-09	14.7307		CCT8	0.262437	8.56759	10.6364	3.64e-25	1.11e-23	46.2806		RALGDS	-0.349244	7.78566	-8.65037	1.89e-17	5.76e-16	28.8726
ASB7	0.151329	5.52436	6.66264	4.33e-11	1.32e-09	14.7246		LIMS2	-0.791126	5.9253	-10.6355	3.67e-25	1.12e-23	46.2726		CUEDC1	-0.539941	6.88197	-8.64988	1.9e-17	5.77e-16	28.8687
FBXW4	-0.209576	6.93863	-6.66234	4.34e-11	1.32e-09	14.7227		EBPL	0.493793	8.25164	10.635	3.69e-25	1.12e-23	46.2672		EXOC7	-0.282038	6.76417	-8.64914	1.91e-17	5.79e-16	28.8628
KCNMB1	-0.716865	6.38765	-6.6616	4.36e-11	1.32e-09	14.7181		HMGB2	0.497612	7.85954	10.6349	3.69e-25	1.12e-23	46.2669		FBXO31	-0.378627	7.01434	-8.64742	1.94e-17	5.87e-16	28.849
SH3PXD2A	-0.32934	7.35964	-6.66026	4.4e-11	1.33e-09	14.7096		JAM3	-0.749536	6.77667	-10.6331	3.76e-25	1.14e-23	46.249		RFC4	0.430301	7.60439	8.64456	1.99e-17	5.98e-16	28.8261
EML1	-0.521071	6.06901	-6.65935	4.42e-11	1.34e-09	14.7039		RRS1	0.445132	7.53252	10.6324	3.78e-25	1.14e-23	46.2422		PLXNA1	-0.378963	6.35405	-8.64449	1.99e-17	5.98e-16	28.8255
PTGS1	-0.362843	6.09469	-6.65518	4.55e-11	1.37e-09	14.6777		DDX28	0.314844	5.65623	10.6118	4.62e-25	1.39e-23	46.0462		HLA-DRA	0.693066	10.2124	8.64056	2.05e-17	6.17e-16	28.794
MAP3K3	-0.194054	5.41304	-6.65407	4.58e-11	1.38e-09	14.6706		DCLRE1A	0.467227	6.14567	10.6108	4.66e-25	1.4e-23	46.0366		FAM73B	-0.365424	6.21444	-8.63979	2.07e-17	6.19e-16	28.7879
NOC3L	0.235368	7.75642	6.65382	4.59e-11	1.38e-09	14.6691		DDX10	0.310724	6.68643	10.6102	4.69e-25	1.41e-23	46.031		SELT	0.309131	7.49834	8.63897	2.08e-17	6.22e-16	28.7813
SCD	0.525508	8.04418	6.65325	4.6e-11	1.38e-09	14.6654		ACACB	-0.635557	6.36444	-10.6095	4.72e-25	1.41e-23	46.0238		SLC39A8	0.596572	5.69042	8.63231	2.2e-17	6.56e-16	28.7281
XPO5	0.306913	6.66826	6.65317	4.61e-11	1.38e-09	14.665		COL16A1	-0.847211	7.18415	-10.5991	5.22e-25	1.56e-23	45.9255		PNKP	-0.370082	7.29307	-8.62726	2.29e-17	6.82e-16	28.6876
RBM28	0.236267	6.6467	6.65191	4.64e-11	1.39e-09	14.6571		EIF6	0.47269	8.54175	10.5974	5.31e-25	1.58e-23	45.909		UTP15	0.316032	5.46374	8.62217	2.38e-17	7.09e-16	28.6469
LRRC17	-0.411856	4.97884	-6.65093	4.67e-11	1.39e-09	14.6509		STON1	-0.814144	5.4747	-10.5965	5.35e-25	1.59e-23	45.9002		PCNP	0.287144	8.36541	8.60919	2.65e-17	7.87e-16	28.5433
KIT	-0.556964	6.39182	-6.64925	4.73e-11	1.41e-09	14.6403		BZW2	0.457586	9.09195	10.589	5.75e-25	1.71e-23	45.8289		GMNN	0.553632	7.46219	8.60624	2.72e-17	8.05e-16	28.5198
BZW1	0.158003	6.88854	6.64244	4.94e-11	1.47e-09	14.5975		YDJC	0.480047	6.35542	10.5821	6.15e-25	1.82e-23	45.7629		ABHD14B	-0.45702	6.86787	-8.6054	2.73e-17	8.09e-16	28.5131
DARS2	0.330535	6.55765	6.64084	4.99e-11	1.48e-09	14.5874		SHANK3	-0.597089	6.05484	-10.5785	6.37e-25	1.88e-23	45.7291		ADCY9	-0.372675	5.81741	-8.60063	2.84e-17	8.38e-16	28.475
FBLN5	-0.502019	6.40612	-6.6401	5.02e-11	1.48e-09	14.5828		HDAC2	0.385429	8.12674	10.578	6.4e-25	1.89e-23	45.7241		PGF	-0.38064	5.96221	-8.60038	2.85e-17	8.38e-16	28.473
PTRF	-0.46394	8.13191	-6.63707	5.12e-11	1.51e-09	14.5637		ECHDC2	-0.629571	7.72005	-10.5767	6.48e-25	1.91e-23	45.7124		TCEB1	0.316547	8.32212	8.60031	2.85e-17	8.38e-16	28.4725
GINS4	0.291969	4.97892	6.63467	5.2e-11	1.53e-09	14.5487		GTF3C3	0.306643	6.56197	10.5704	6.88e-25	2.02e-23	45.6522		SPSB3	-0.394624	7.62645	-8.593	3.02e-17	8.87e-16	28.4142
LPP	-0.378075	8.40233	-6.63399	5.22e-11	1.53e-09	14.5444		TRIP13	0.76464	7.10703	10.5662	7.17e-25	2.1e-23	45.6123		MICALL2	-0.325017	5.4285	-8.58113	3.33e-17	9.75e-16	28.3197
SRP72	0.183291	7.26295	6.62847	5.41e-11	1.59e-09	14.5098		FANCD2	0.440912	5.38696	10.5551	7.98e-25	2.34e-23	45.507		MRPL19	0.438844	6.16154	8.58066	3.34e-17	9.77e-16	28.316
ZFYVE1	-0.130605	5.55587	-6.62745	5.45e-11	1.59e-09	14.5033		CENPM	0.696813	6.43525	10.5531	8.14e-25	2.37e-23	45.4876		PAQR7	-0.434144	5.8304	-8.57546	3.49e-17	1.02e-15	28.2746
GTF2H3	0.213856	6.67173	6.62065	5.69e-11	1.66e-09	14.4607		HNRNPF	0.35027	7.13814	10.5528	8.16e-25	2.37e-23	45.4851		CARM1	-0.364969	7.71698	-8.57501	3.5e-17	1.02e-15	28.2711
EBF1	-0.429499	5.76303	-6.61936	5.74e-11	1.67e-09	14.4526		TK1	0.66745	7.31165	10.5528	8.16e-25	2.37e-23	45.4848		CCDC149	-0.278138	4.90345	-8.57474	3.51e-17	1.02e-15	28.2689
PHF1	-0.196321	6.36016	-6.6182	5.78e-11	1.68e-09	14.4454		OLFM1	-0.706861	5.67096	-10.5527	8.16e-25	2.37e-23	45.4843		PIGH	0.396864	6.16933	8.57316	3.55e-17	1.03e-15	28.2563
CCDC3	-0.438628	6.70303	-6.6124	6.01e-11	1.74e-09	14.409		PAM	-0.571253	9.14268	-10.5515	8.26e-25	2.4e-23	45.4725		UQCRC2	0.461038	7.99163	8.56831	3.7e-17	1.07e-15	28.2178
BCCIP	0.208463	7.23464	6.60961	6.11e-11	1.77e-09	14.3916		TRMT10C	0.409027	7.19883	10.546	8.71e-25	2.52e-23	45.4202		UBE2D1	0.251647	5.32679	8.56769	3.72e-17	1.07e-15	28.2129
NUP205	0.206465	7.27108	6.60701	6.22e-11	1.8e-09	14.3753		SLC24A3	-0.700821	6.10264	-10.5442	8.86e-25	2.56e-23	45.4038		TRAM1	0.279305	9.71078	8.56445	3.81e-17	1.1e-15	28.1872
IGFBP7	-0.442535	9.49596	-6.60137	6.45e-11	1.86e-09	14.3401		PPAP2B	-0.563065	7.37339	-10.5435	8.92e-25	2.57e-23	45.3968		CXXC1	-0.325068	7.61524	-8.56057	3.94e-17	1.13e-15	28.1563
DEK	0.24238	9.2095	6.59967	6.52e-11	1.88e-09	14.3294		NUP205	0.333725	7.27108	10.5403	9.2e-25	2.65e-23	45.3666		SLC35A5	0.310982	7.62277	8.55983	3.96e-17	1.14e-15	28.1504
C14orf132	-0.583958	5.98995	-6.59887	6.56e-11	1.89e-09	14.3244		MTFR1	0.458473	7.08477	10.5318	9.99e-25	2.87e-23	45.2855		ATXN7L3	-0.33189	7.0421	-8.5571	4.05e-17	1.16e-15	28.1288
MRPL44	0.205167	6.25321	6.59834	6.58e-11	1.89e-09	14.3212		FMOD	-0.825811	7.19841	-10.5314	1e-24	2.87e-23	45.2818		ARL6IP6	0.409615	6.47416	8.55601	4.08e-17	1.17e-15	28.1201
BIRC5	0.444379	6.40545	6.59711	6.63e-11	1.9e-09	14.3135		RSRC1	0.463785	6.29205	10.527	1.05e-24	2.99e-23	45.2403		RABL3	0.401405	6.125	8.54009	4.65e-17	1.33e-15	27.9938
C21orf59	0.194988	6.50707	6.59698	6.64e-11	1.9e-09	14.3126		ZNF92	0.249399	4.78961	10.5264	1.05e-24	3e-23	45.2343		ECD	0.293967	6.61014	8.53915	4.68e-17	1.33e-15	27.9864
GRASP	-0.249489	5.5533	-6.59673	6.65e-11	1.9e-09	14.3111		CCT7	0.305636	8.87467	10.5214	1.1e-24	3.14e-23	45.1873		ZFR	0.288522	7.65007	8.53095	5e-17	1.42e-15	27.9215
GYPC	-0.433365	6.9169	-6.59662	6.65e-11	1.9e-09	14.3104		CFH	-0.931611	6.783	-10.5194	1.12e-24	3.2e-23	45.1687		MIB2	-0.508875	5.90755	-8.52208	5.37e-17	1.53e-15	27.8513
SLBP	0.257942	7.75878	6.59464	6.74e-11	1.92e-09	14.298		ZNF471	-0.51726	4.14285	-10.5191	1.13e-24	3.2e-23	45.166		PPP1CC	0.236916	9.77875	8.51971	5.48e-17	1.55e-15	27.8325
LRCH3	-0.209167	5.38065	-6.59433	6.75e-11	1.92e-09	14.2961		RASL12	-0.646608	6.09263	-10.5147	1.18e-24	3.34e-23	45.1237		PIK3R2	-0.342511	7.74011	-8.51729	5.59e-17	1.58e-15	27.8134
PLAC9	-0.572227	5.61577	-6.59319	6.8e-11	1.93e-09	14.289		SNRPG	0.255713	10.2783	10.4982	1.38e-24	3.9e-23	44.9678		OGDH	-0.330162	6.08212	-8.51705	5.6e-17	1.58e-15	27.8115
ISL1	-0.613695	6.90339	-6.58866	7e-11	1.98e-09	14.2607		PRKCDBP	-0.67928	7.57023	-10.4924	1.46e-24	4.12e-23	44.9128		WDR13	-0.321221	6.99188	-8.5141	5.73e-17	1.62e-15	27.7882
HSPH1	0.306739	8.42207	6.58696	7.08e-11	2e-09	14.2501		LRRC32	-0.709578	7.2031	-10.4882	1.52e-24	4.27e-23	44.8737		SEC16A	-0.354291	8.26656	-8.51249	5.81e-17	1.63e-15	27.7755
ZMIZ1	-0.226504	7.52092	-6.58531	7.16e-11	2.02e-09	14.2398		RFWD3	0.468933	6.72953	10.48	1.64e-24	4.61e-23	44.7962		CCNG1	0.44228	8.14528	8.50094	6.37e-17	1.79e-15	27.6842
COL14A1	-0.53759	5.55629	-6.58411	7.21e-11	2.03e-09	14.2323		AK2	0.306045	7.60149	10.4763	1.7e-24	4.77e-23	44.7611		EXOSC3	0.349727	6.78276	8.49939	6.45e-17	1.81e-15	27.672
FH	0.264733	8.36099	6.58089	7.36e-11	2.07e-09	14.2123		LMO3	-0.776751	4.55486	-10.475	1.72e-24	4.83e-23	44.7485		RARS	0.295602	8.67744	8.49539	6.67e-17	1.86e-15	27.6405
LBR	0.283473	7.53537	6.58037	7.39e-11	2.07e-09	14.209		CRYAB	-1.08692	6.66264	-10.4741	1.74e-24	4.85e-23	44.7408		SPAST	0.303584	6.24542	8.49426	6.73e-17	1.88e-15	27.6315
RAI2	-0.428262	5.82863	-6.57685	7.56e-11	2.11e-09	14.1871		PSAT1	0.865779	6.74847	10.4708	1.79e-24	5e-23	44.7093		SEC24C	-0.298057	7.88073	-8.49052	6.93e-17	1.93e-15	27.6021
NUDT5	0.291474	7.92564	6.57675	7.56e-11	2.11e-09	14.1865		CDC7	0.524113	6.28315	10.4667	1.86e-24	5.19e-23	44.671		SLAMF7	0.63996	5.45364	8.48935	7e-17	1.95e-15	27.5928
AURKB	0.447199	6.23134	6.57503	7.65e-11	2.13e-09	14.1757		MGP	-1.26134	8.4134	-10.4631	1.93e-24	5.36e-23	44.6368		TUBGCP6	-0.244627	5.22183	-8.48385	7.31e-17	2.03e-15	27.5495
RTN4IP1	0.288585	6.36645	6.57144	7.83e-11	2.18e-09	14.1534		ATIC	0.33584	8.87621	10.4608	1.97e-24	5.47e-23	44.6151		GDI1	-0.370684	7.34273	-8.48294	7.37e-17	2.04e-15	27.5423
SPC24	0.357248	5.98208	6.57093	7.85e-11	2.18e-09	14.1502		RBM12	0.239688	7.03223	10.456	2.06e-24	5.72e-23	44.5699		C14orf79	-0.44383	5.67382	-8.47693	7.73e-17	2.14e-15	27.495
GLT8D2	-0.497283	6.63617	-6.56973	7.91e-11	2.19e-09	14.1427		CCDC80	-0.887839	5.71907	-10.4479	2.23e-24	6.17e-23	44.4937		SNX2	0.349304	7.44309	8.47498	7.86e-17	2.17e-15	27.4797
EPAS1	-0.329777	8.11714	-6.56963	7.92e-11	2.19e-09	14.1421		UBE2S	0.476345	6.04798	10.4475	2.24e-24	6.18e-23	44.4894		FPR3	0.650182	6.39967	8.47468	7.88e-17	2.17e-15	27.4773
HSPG2	-0.254742	5.97677	-6.56924	7.94e-11	2.19e-09	14.1397		MRPS28	0.446687	7.68611	10.4467	2.26e-24	6.22e-23	44.482		RXRA	-0.36797	7.45153	-8.46319	8.64e-17	2.37e-15	27.3869
PLEKHM2	-0.222958	7.15585	-6.56574	8.12e-11	2.24e-09	14.1179		ITGB3BP	0.439389	6.92583	10.4457	2.28e-24	6.26e-23	44.4734		TGDS	0.330193	6.64285	8.46305	8.65e-17	2.37e-15	27.3858
TBC1D7	0.248289	6.35799	6.56292	8.27e-11	2.27e-09	14.1004		ABL1	-0.409348	7.20927	-10.4449	2.3e-24	6.3e-23	44.465		CLASP1	-0.272062	6.68436	-8.45812	9e-17	2.47e-15	27.347
NAP1L3	-0.531496	5.04154	-6.56128	8.36e-11	2.29e-09	14.0902		LSM14B	0.293151	4.9303	10.4437	2.32e-24	6.36e-23	44.4539		ALOX5AP	0.717598	7.90494	8.45703	9.07e-17	2.48e-15	27.3385
FILIP1L	-0.417601	7.05668	-6.56088	8.38e-11	2.3e-09	14.0877		SHE	-0.499041	5.33803	-10.4418	2.36e-24	6.46e-23	44.4366		CD2AP	0.529382	6.94621	8.45617	9.14e-17	2.5e-15	27.3317
RUNX1T1	-0.348326	4.76892	-6.55929	8.47e-11	2.32e-09	14.0779		RDM1	0.57728	4.82692	10.4386	2.44e-24	6.66e-23	44.4058		MAP2K6	0.398503	5.10777	8.45554	9.18e-17	2.5e-15	27.3268
HIST1H3F	0.363559	4.38943	6.55864	8.5e-11	2.32e-09	14.0738		LOXL1	-0.527511	5.95293	-10.4361	2.5e-24	6.81e-23	44.3824		INTS1	-0.319497	6.50569	-8.45132	9.5e-17	2.58e-15	27.2936
MYOCD	-0.552959	5.39598	-6.55662	8.61e-11	2.35e-09	14.0613		PUS7L	0.34005	5.72002	10.4343	2.54e-24	6.91e-23	44.3659		ZNF227	0.358156	5.69224	8.44767	9.78e-17	2.66e-15	27.265
PFDN2	0.243323	6.61801	6.55545	8.68e-11	2.36e-09	14.054		IGF1	-0.89273	5.46737	-10.4306	2.63e-24	7.15e-23	44.3306		PPP2R1B	0.257111	5.66224	8.44743	9.8e-17	2.66e-15	27.2631
C1QBP	0.287421	9.00565	6.55459	8.73e-11	2.37e-09	14.0486		MN1	-0.890091	5.92607	-10.4201	2.91e-24	7.88e-23	44.2327		IER3IP1	0.415161	7.43958	8.43772	1.06e-16	2.87e-15	27.1869
IDH3B	0.209151	8.03942	6.55287	8.82e-11	2.39e-09	14.038		RNF219	0.374666	6.31549	10.4197	2.92e-24	7.9e-23	44.2283		TRMT5	0.314901	8.55623	8.43715	1.06e-16	2.87e-15	27.1824
PARVA	-0.327699	6.37872	-6.54923	9.03e-11	2.44e-09	14.0154		BUB1B	0.623464	6.36482	10.4118	3.15e-24	8.5e-23	44.1543		TTC33	0.374376	5.86233	8.43514	1.08e-16	2.92e-15	27.1667
DUSP2	0.356298	5.74865	6.54901	9.04e-11	2.44e-09	14.014		TIMM8A	0.408415	5.29111	10.4091	3.23e-24	8.7e-23	44.1291		ROGDI	-0.335794	5.89158	-8.43339	1.1e-16	2.95e-15	27.1529
PRICKLE2	-0.490757	6.28791	-6.54878	9.06e-11	2.44e-09	14.0126		OLFML3	-0.817262	6.8453	-10.4035	3.41e-24	9.17e-23	44.076		GRASP	-0.354964	5.5533	-8.43283	1.1e-16	2.96e-15	27.1486
MDFI	0.356439	5.12645	6.54811	9.1e-11	2.45e-09	14.0085		PSMG1	0.477698	7.74119	10.3978	3.6e-24	9.66e-23	44.0228		SLC25A24	0.302405	6.34077	8.42918	1.13e-16	3.04e-15	27.12
CCT6A	0.225926	8.31457	6.54524	9.27e-11	2.49e-09	13.9907		SYNCRIP	0.32996	7.90649	10.3958	3.67e-24	9.83e-23	44.0039		MRS2	0.337408	6.00647	8.4291	1.14e-16	3.04e-15	27.1194
NUP43	0.207347	7.12739	6.54377	9.35e-11	2.51e-09	13.9815		SASH1	-0.464853	7.06844	-10.3942	3.72e-24	9.96e-23	43.9893		LARP4	0.308282	6.51339	8.4266	1.16e-16	3.09e-15	27.0998
SLIT2	-0.597066	6.03802	-6.54333	9.38e-11	2.51e-09	13.9788		HEG1	-0.543979	6.85911	-10.3912	3.83e-24	1.02e-22	43.9609		GPR153	-0.26283	5.48214	-8.42594	1.16e-16	3.1e-15	27.0946
SASH1	-0.288758	7.06844	-6.5419	9.47e-11	2.53e-09	13.97		BNC2	-0.736977	5.53388	-10.388	3.94e-24	1.05e-22	43.9315		SEC23B	0.424828	7.998	8.42586	1.16e-16	3.1e-15	27.094
PGK1	0.242046	8.38648	6.54172	9.48e-11	2.53e-09	13.9688		EME1	0.377943	5.52567	10.388	3.95e-24	1.05e-22	43.9307		UBE2O	-0.331417	5.88721	-8.42498	1.17e-16	3.12e-15	27.0871
DACT3	-0.508591	6.25213	-6.53955	9.61e-11	2.56e-09	13.9554		CSTF1	0.311606	5.66518	10.3869	3.99e-24	1.06e-22	43.9209		MEPCE	-0.29737	7.85059	-8.42344	1.19e-16	3.15e-15	27.0751
INTS7	0.241641	5.6559	6.53677	9.78e-11	2.6e-09	13.9382		SFXN4	0.324107	7.15342	10.3828	4.15e-24	1.1e-22	43.8821		STX1A	-0.503187	5.8595	-8.42009	1.22e-16	3.23e-15	27.0488
PPIL1	0.287305	7.4709	6.52898	1.03e-10	2.73e-09	13.8899		RIPK2	0.491503	7.32132	10.3754	4.45e-24	1.18e-22	43.8129		GIT1	-0.323649	6.00329	-8.41783	1.24e-16	3.28e-15	27.0312
EARS2	0.203656	6.12422	6.52868	1.03e-10	2.73e-09	13.8881		CDK5RAP1	0.315686	6.91636	10.3618	5.06e-24	1.34e-22	43.6862		CAMTA2	-0.260182	5.36924	-8.41506	1.27e-16	3.35e-15	27.0095
PTPRB	-0.259019	5.69827	-6.52825	1.03e-10	2.73e-09	13.8854		ZNRD1	0.323822	6.50143	10.36	5.15e-24	1.36e-22	43.6695		DOCK6	-0.313083	6.14049	-8.41278	1.29e-16	3.41e-15	26.9916
RFT1	0.175267	5.15668	6.52507	1.05e-10	2.78e-09	13.8657		ENG	-0.580023	6.47054	-10.3555	5.37e-24	1.42e-22	43.6274		TFDP1	0.384034	7.88715	8.41185	1.3e-16	3.43e-15	26.9843
G3BP1	0.248087	6.84362	6.52482	1.06e-10	2.78e-09	13.8642		BHMT2	-0.581643	4.54357	-10.3513	5.59e-24	1.47e-22	43.5879		SETD1A	-0.422819	6.06155	-8.40405	1.39e-16	3.64e-15	26.9233
TLE4	-0.292304	5.7559	-6.52387	1.06e-10	2.8e-09	13.8584		ADAMTS1	-0.791308	6.6456	-10.3451	5.93e-24	1.56e-22	43.5294		RHOT2	-0.327311	6.87537	-8.4016	1.41e-16	3.71e-15	26.9042
SEPHS1	0.200857	7.27103	6.51833	1.1e-10	2.89e-09	13.8241		CIAPIN1	0.323479	6.51378	10.3447	5.95e-24	1.56e-22	43.5259		ZNF76	-0.462632	5.49606	-8.40046	1.43e-16	3.73e-15	26.8953
C12orf5	0.292079	6.75249	6.51524	1.12e-10	2.94e-09	13.805		ESCO2	0.423767	4.56381	10.337	6.4e-24	1.67e-22	43.4546		ITGA4	0.440647	5.3397	8.39275	1.52e-16	3.96e-15	26.8351
MYH11	-0.909648	7.9071	-6.51486	1.13e-10	2.95e-09	13.8026		PDGFD	-0.601425	5.63498	-10.335	6.53e-24	1.7e-22	43.4354		VRK2	0.417576	6.70485	8.39012	1.55e-16	4.04e-15	26.8146
FTSJ2	0.177382	6.37497	6.51457	1.13e-10	2.95e-09	13.8008		MYH11	-1.46199	7.9071	-10.3343	6.57e-24	1.71e-22	43.4293		LYSMD2	0.411846	8.12787	8.38854	1.57e-16	4.08e-15	26.8023
DENR	0.180208	7.75803	6.51258	1.14e-10	2.98e-09	13.7886		FAM107A	-0.78872	5.88697	-10.3296	6.87e-24	1.79e-22	43.385		GPBP1	0.26672	7.67995	8.38735	1.58e-16	4.12e-15	26.793
RHEBL1	0.297237	4.7125	6.51229	1.14e-10	2.98e-09	13.7868		MRVI1	-0.678052	5.50496	-10.3272	7.03e-24	1.83e-22	43.3627		BCLAF1	0.202617	7.57352	8.38664	1.59e-16	4.13e-15	26.7875
ARHGAP20	-0.285622	4.71644	-6.50388	1.21e-10	3.14e-09	13.7349		TOMM40	0.431638	8.11814	10.321	7.45e-24	1.93e-22	43.3054		USP36	-0.327376	5.8596	-8.38108	1.67e-16	4.31e-15	26.7441
TIMELESS	0.297434	6.57025	6.50324	1.21e-10	3.15e-09	13.731		ILF2	0.380613	9.04555	10.3195	7.55e-24	1.96e-22	43.2914		HMG20B	-0.326428	7.21742	-8.37621	1.73e-16	4.48e-15	26.7061
VWF	-0.392014	7.94487	-6.50137	1.23e-10	3.18e-09	13.7194		TIMELESS	0.47813	6.57025	10.3179	7.67e-24	1.98e-22	43.2766		GTPBP6	-0.330705	7.88333	-8.37578	1.74e-16	4.48e-15	26.7028
AMD1	0.220354	7.95434	6.50124	1.23e-10	3.18e-09	13.7186		FGD5	-0.521602	6.10178	-10.3144	7.93e-24	2.04e-22	43.2437		SLC39A6	0.368349	6.5959	8.37366	1.77e-16	4.55e-15	26.6863
PBX3	-0.42603	7.52903	-6.49547	1.27e-10	3.29e-09	13.6831		TMTC1	-0.608179	5.38102	-10.3143	7.94e-24	2.04e-22	43.2425		ZNF362	-0.376691	6.412	-8.37005	1.82e-16	4.68e-15	26.6582
SERTAD4	-0.472301	5.53041	-6.49344	1.29e-10	3.33e-09	13.6706		RERG	-0.949478	5.855	-10.3129	8.04e-24	2.07e-22	43.2299		DNAJA1	0.306752	9.48923	8.36985	1.82e-16	4.68e-15	26.6566
PLCD1	-0.230238	5.83513	-6.49287	1.3e-10	3.33e-09	13.6671		ECM2	-0.711459	6.10303	-10.3106	8.22e-24	2.11e-22	43.2082		TESK1	-0.360646	6.87763	-8.36947	1.83e-16	4.68e-15	26.6536
FERMT2	-0.534633	7.85471	-6.48999	1.32e-10	3.39e-09	13.6494		DCLK1	-0.704422	5.14046	-10.3079	8.43e-24	2.16e-22	43.1833		GARNL3	-0.365729	4.60602	-8.36882	1.84e-16	4.7e-15	26.6486
MAP2K6	0.274791	5.10777	6.48935	1.33e-10	3.4e-09	13.6454		WDR77	0.339554	6.8433	10.3077	8.45e-24	2.16e-22	43.1814		MFAP3	0.274222	5.98016	8.36051	1.96e-16	5.01e-15	26.5839
HEATR3	0.2127	5.8852	6.48874	1.33e-10	3.4e-09	13.6417		POLA1	0.395713	6.52634	10.3065	8.54e-24	2.18e-22	43.1699		RAD51AP1	0.609173	7.33076	8.35982	1.97e-16	5.03e-15	26.5786
C20orf27	0.296818	6.82332	6.48569	1.36e-10	3.47e-09	13.623		PDZD2	-0.504219	4.82136	-10.3064	8.55e-24	2.18e-22	43.1688		MINPP1	0.430539	6.64764	8.35769	2.01e-16	5.11e-15	26.562
TRMT5	0.217456	8.55623	6.4846	1.37e-10	3.48e-09	13.6162		SLIT2	-0.952643	6.03802	-10.3042	8.73e-24	2.22e-22	43.1485		CLPX	0.281332	7.16966	8.35724	2.01e-16	5.12e-15	26.5585
PRKDC	0.263175	6.73509	6.48298	1.38e-10	3.51e-09	13.6063		ZNF239	0.516058	6.55603	10.3035	8.79e-24	2.23e-22	43.1418		PPA1	0.355027	10.3137	8.35702	2.02e-16	5.12e-15	26.5568
LRRC32	-0.432752	7.2031	-6.48088	1.4e-10	3.56e-09	13.5933		NANP	0.322804	5.95899	10.3006	9.04e-24	2.29e-22	43.1148		PRR14	-0.280205	7.51227	-8.35649	2.03e-16	5.13e-15	26.5527
PPP2R5B	-0.216277	5.82152	-6.47549	1.45e-10	3.67e-09	13.5603		SYNPO2	-1.14943	6.06787	-10.2949	9.54e-24	2.41e-22	43.0618		PM20D2	0.469304	6.42125	8.35595	2.03e-16	5.14e-15	26.5485
TAF1A	0.252431	5.315	6.47157	1.48e-10	3.76e-09	13.5362		ABCA6	-0.671616	4.7795	-10.2946	9.56e-24	2.42e-22	43.0594		NDUFB3	0.300783	9.0236	8.3557	2.04e-16	5.14e-15	26.5465
CCDC107	-0.241802	6.04411	-6.46603	1.54e-10	3.89e-09	13.5022		TFB2M	0.399956	6.61048	10.2923	9.77e-24	2.47e-22	43.038		CIC	-0.288032	6.31681	-8.35503	2.05e-16	5.16e-15	26.5413
CBFB	0.234715	7.1041	6.46553	1.54e-10	3.89e-09	13.4991		RMI1	0.403082	6.7845	10.2845	1.05e-23	2.65e-22	42.9652		GMPR2	0.250115	7.35549	8.35098	2.12e-16	5.32e-15	26.5098
CXCL3	0.572745	6.19758	6.46479	1.55e-10	3.91e-09	13.4946		CTSO	-0.631902	7.25746	-10.2834	1.06e-23	2.67e-22	42.9555		SAP30	0.461022	6.60552	8.34837	2.16e-16	5.42e-15	26.4896
PRC1	0.443653	7.88958	6.46146	1.58e-10	3.98e-09	13.4742		ADRB2	-0.658222	5.5083	-10.2829	1.07e-23	2.68e-22	42.9509		MRPS23	0.327898	6.92058	8.3477	2.17e-16	5.44e-15	26.4843
PUS7L	0.207711	5.72002	6.45765	1.62e-10	4.07e-09	13.4509		NAV1	-0.432069	5.67331	-10.282	1.08e-23	2.7e-22	42.9418		VNN2	0.744589	5.638	8.34696	2.18e-16	5.47e-15	26.4786
STAT1	0.368023	8.69041	6.45255	1.68e-10	4.2e-09	13.4196		GAS7	-0.440802	5.46847	-10.278	1.12e-23	2.8e-22	42.9053		EVI2A	0.549998	6.22508	8.34614	2.2e-16	5.49e-15	26.4722
ORAI3	-0.217561	6.07709	-6.4513	1.69e-10	4.23e-09	13.412		POLA2	0.389167	6.32835	10.2745	1.16e-23	2.89e-22	42.8722		B3GNT5	0.506937	6.04137	8.34237	2.27e-16	5.65e-15	26.443
RAB7B	-0.296231	5.33504	-6.45075	1.69e-10	4.23e-09	13.4086		SGCE	-0.856828	7.33851	-10.2721	1.18e-23	2.95e-22	42.8506		CCL18	0.794807	6.12843	8.33783	2.35e-16	5.85e-15	26.4077
TAF5	0.203384	6.21929	6.45001	1.7e-10	4.25e-09	13.4041		MTIF2	0.318146	7.7435	10.2715	1.19e-23	2.96e-22	42.8446		SLC25A40	0.38862	5.99815	8.33342	2.43e-16	6.05e-15	26.3735
TRMT10C	0.246899	7.19883	6.44982	1.7e-10	4.25e-09	13.4029		ENOPH1	0.318035	8.46847	10.2678	1.23e-23	3.06e-22	42.8104		CORO7	-0.384397	5.82524	-8.32905	2.52e-16	6.25e-15	26.3396
NFATC4	-0.190015	4.77644	-6.44846	1.72e-10	4.27e-09	13.3946		SSBP2	-0.630009	5.66752	-10.2676	1.23e-23	3.06e-22	42.8082		UBN1	-0.275176	7.31437	-8.32379	2.63e-16	6.51e-15	26.2988
MRPL47	0.225377	6.88733	6.44715	1.73e-10	4.3e-09	13.3866		MSRB3	-0.948208	6.34919	-10.2592	1.34e-23	3.31e-22	42.7301		MLLT6	-0.371069	6.98167	-8.32072	2.69e-16	6.65e-15	26.2751
ESF1	0.17601	5.80208	6.44595	1.75e-10	4.33e-09	13.3793		ITPA	0.362356	7.89459	10.2488	1.47e-23	3.64e-22	42.6341		VAMP7	0.312319	8.35042	8.31938	2.72e-16	6.71e-15	26.2647
TMEM14B	0.261197	8.88637	6.43612	1.86e-10	4.6e-09	13.3192		F13A1	-0.934394	5.84255	-10.2435	1.55e-23	3.82e-22	42.5849		DIS3L2	-0.281263	5.57554	-8.3163	2.79e-16	6.87e-15	26.2408
NUP98	0.173958	6.01868	6.43078	1.92e-10	4.75e-09	13.2866		MRPS9	0.34149	7.64239	10.2413	1.58e-23	3.89e-22	42.5648		ASF1A	0.360772	6.94106	8.31407	2.84e-16	6.98e-15	26.2236
RBL1	0.194195	4.70847	6.42967	1.94e-10	4.78e-09	13.2798		KNTC1	0.478241	6.66498	10.2402	1.6e-23	3.93e-22	42.5543		FLJ35934	-0.337698	4.03864	-8.31298	2.86e-16	7.03e-15	26.2151
DSCR4	0.198237	4.06102	6.42938	1.94e-10	4.78e-09	13.2781		IGFBP5	-0.675643	8.24186	-10.2376	1.64e-23	4.02e-22	42.53		ATP11C	0.295758	6.00687	8.30643	3.01e-16	7.39e-15	26.1645
PCDH18	-0.368147	6.68562	-6.42808	1.96e-10	4.81e-09	13.2701		RRP15	0.390492	6.85449	10.2333	1.7e-23	4.18e-22	42.4905		G3BP1	0.351465	6.84362	8.30536	3.04e-16	7.44e-15	26.1562
CXorf56	0.222098	5.14633	6.42672	1.97e-10	4.84e-09	13.2618		CCDC3	-0.687589	6.70303	-10.2305	1.75e-23	4.28e-22	42.4651		CLK2	-0.294826	6.8587	-8.30196	3.12e-16	7.63e-15	26.1299
OTUD6B	0.243947	6.59078	6.42418	2.01e-10	4.91e-09	13.2464		MYBL2	0.58576	5.6525	10.2248	1.84e-23	4.51e-22	42.4123		NAMPT	0.529934	7.16411	8.30081	3.15e-16	7.69e-15	26.121
PM20D2	0.324155	6.42125	6.42367	2.01e-10	4.92e-09	13.2433		GRPEL1	0.382668	7.35944	10.2236	1.86e-23	4.55e-22	42.4009		TTLL3	-0.261548	4.81265	-8.29971	3.18e-16	7.74e-15	26.1125
PDZD8	0.311217	7.10428	6.42226	2.03e-10	4.96e-09	13.2346		TPST1	-0.572763	6.36639	-10.2221	1.89e-23	4.61e-22	42.3869		FAM98C	-0.320732	6.35955	-8.29832	3.21e-16	7.81e-15	26.1018
FAM107A	-0.483796	5.88697	-6.4197	2.06e-10	5.03e-09	13.2191		VASN	-0.583502	6.67915	-10.2155	2.01e-23	4.89e-22	42.3263		USP19	-0.212485	5.56647	-8.29253	3.36e-16	8.16e-15	26.057
PEG3	-0.480104	4.99117	-6.41653	2.1e-10	5.12e-09	13.1997		EHD2	-0.607401	6.09896	-10.2155	2.01e-23	4.89e-22	42.3263		SEC24D	0.396673	6.13807	8.29237	3.37e-16	8.16e-15	26.0558
KIAA0513	-0.327408	5.47558	-6.41497	2.13e-10	5.16e-09	13.1903		SLBP	0.404637	7.75878	10.2104	2.11e-23	5.12e-22	42.2786		MEX3C	0.361256	6.2088	8.29166	3.38e-16	8.2e-15	26.0503
NFXL1	0.231554	6.74949	6.41492	2.13e-10	5.16e-09	13.19		MGC24103	-0.851866	5.29058	-10.2061	2.2e-23	5.33e-22	42.2387		PAIP2	0.337677	7.46747	8.2879	3.49e-16	8.43e-15	26.0213
FAM89B	-0.212016	7.19058	-6.41433	2.13e-10	5.16e-09	13.1863		IGFBP7	-0.693044	9.49596	-10.2036	2.25e-23	5.44e-22	42.2162		MBD2	0.180876	5.34412	8.27735	3.79e-16	9.15e-15	25.9399
LRRC8A	-0.251023	7.20241	-6.41421	2.14e-10	5.16e-09	13.1856		KCNMB1	-1.11242	6.38765	-10.2027	2.27e-23	5.48e-22	42.2081		SSR1	0.304369	8.58954	8.27645	3.82e-16	9.2e-15	25.933
TRMT11	0.205943	6.87329	6.41396	2.14e-10	5.16e-09	13.1841		RGMA	-1.02165	6.53929	-10.1959	2.42e-23	5.83e-22	42.1453		NFIC	-0.456293	6.33169	-8.27385	3.89e-16	9.37e-15	25.9129
ARMCX4	-0.211543	4.50057	-6.41351	2.15e-10	5.17e-09	13.1814		CKAP5	0.361057	7.69954	10.1951	2.44e-23	5.86e-22	42.1374		LPPR2	-0.309046	5.59027	-8.26952	4.03e-16	9.68e-15	25.8795
DRD2	0.170445	4.64405	6.40932	2.2e-10	5.3e-09	13.1559		TEK	-0.582337	5.98408	-10.1876	2.61e-23	6.28e-22	42.0688		SPEN	-0.253331	7.4249	-8.25732	4.44e-16	1.06e-14	25.7856
STON1	-0.485983	5.4747	-6.40878	2.21e-10	5.31e-09	13.1526		MXRA8	-0.623312	6.21183	-10.1857	2.66e-23	6.38e-22	42.0509		ME2	0.392139	7.47242	8.25688	4.45e-16	1.07e-14	25.7822
MNAT1	0.225751	6.06253	6.40391	2.28e-10	5.47e-09	13.123		AMPH	-0.512305	5.14603	-10.1849	2.68e-23	6.42e-22	42.0433		AGPS	0.344096	7.1398	8.25346	4.57e-16	1.09e-14	25.7559
CXCL11	0.710096	5.91277	6.40372	2.28e-10	5.47e-09	13.1218		AHNAK	-0.478682	7.28587	-10.1806	2.79e-23	6.67e-22	42.0036		GCH1	0.401534	6.72496	8.24536	4.87e-16	1.16e-14	25.6936
SPRYD3	-0.25437	7.20756	-6.40338	2.29e-10	5.47e-09	13.1198		YPEL5	-0.400075	8.47499	-10.1767	2.89e-23	6.91e-22	41.9676		EZH1	-0.211996	5.23544	-8.24449	4.91e-16	1.17e-14	25.6869
PDIA6	0.259511	8.46077	6.40263	2.3e-10	5.48e-09	13.1152		KCNJ8	-0.692861	6.24779	-10.1758	2.92e-23	6.95e-22	41.9599		SFXN5	-0.307779	5.26828	-8.24318	4.96e-16	1.18e-14	25.6769
PRPH2	-0.24402	4.85357	-6.40138	2.32e-10	5.52e-09	13.1076		PMP22	-0.633263	7.01359	-10.1755	2.93e-23	6.96e-22	41.957		SLC35E1	-0.417797	7.64276	-8.23697	5.2e-16	1.24e-14	25.6292
SCARA3	-0.376736	4.97259	-6.39887	2.35e-10	5.6e-09	13.0924		CCDC92	-0.485766	7.58011	-10.1678	3.14e-23	7.47e-22	41.8861		SEC11C	0.505896	7.38728	8.23533	5.27e-16	1.25e-14	25.6166
LRP8	0.386892	5.64992	6.39859	2.36e-10	5.6e-09	13.0907		MTHFD1	0.369879	7.21083	10.1666	3.18e-23	7.55e-22	41.8749		NCBP1	0.342765	6.45012	8.23022	5.49e-16	1.3e-14	25.5774
C14orf1	0.258292	5.67283	6.3966	2.39e-10	5.66e-09	13.0786		EPAS1	-0.517017	8.11714	-10.1656	3.21e-23	7.61e-22	41.8655		KIAA0556	-0.303553	6.55463	-8.22893	5.54e-16	1.31e-14	25.5675
TAF8	0.184923	4.81756	6.39564	2.4e-10	5.69e-09	13.0728		NLE1	0.337405	5.24846	10.1546	3.56e-23	8.41e-22	41.7647		ZFHX2	-0.250325	4.82938	-8.22275	5.82e-16	1.37e-14	25.5201
KPTN	0.191897	5.4266	6.39499	2.41e-10	5.7e-09	13.0688		ZNF165	0.712626	6.38066	10.1534	3.6e-23	8.49e-22	41.7535		MAPKAPK5	0.266365	6.86459	8.22224	5.84e-16	1.38e-14	25.5162
ST6GALNAC6	-0.382459	6.0134	-6.39449	2.42e-10	5.71e-09	13.0658		HMGB3	0.596332	6.78171	10.1503	3.7e-23	8.73e-22	41.7252		CYBB	0.558769	5.9636	8.22218	5.85e-16	1.38e-14	25.5157
DCLK1	-0.431038	5.14046	-6.39069	2.48e-10	5.84e-09	13.0427		CNTNAP1	-0.685963	5.79893	-10.1458	3.86e-23	9.09e-22	41.6839		HCN3	-0.409403	5.26026	-8.22198	5.85e-16	1.38e-14	25.5142
CCT8	0.155613	8.56759	6.3901	2.49e-10	5.85e-09	13.0392		CDC123	0.388381	8.10188	10.1374	4.18e-23	9.82e-22	41.6064		SSB	0.300147	8.08312	8.21968	5.96e-16	1.4e-14	25.4965
NKRF	0.205391	7.0166	6.3888	2.51e-10	5.89e-09	13.0313		POMP	0.318208	9.09132	10.136	4.23e-23	9.92e-22	41.594		RABGAP1	-0.364863	7.77352	-8.2177	6.05e-16	1.42e-14	25.4814
LDOC1	-0.475783	5.8313	-6.38565	2.56e-10	6e-09	13.0122		FGF7	-0.574097	4.45877	-10.1323	4.38e-23	1.03e-21	41.5594		GLT1D1	0.471614	4.58933	8.21614	6.13e-16	1.43e-14	25.4694
PDRG1	0.233988	7.17609	6.38357	2.59e-10	6.07e-09	12.9996		TCEAL7	-0.773965	5.25302	-10.1316	4.41e-23	1.03e-21	41.5536		GPR34	0.572412	5.68877	8.20811	6.53e-16	1.52e-14	25.4079
MYADM	-0.356255	8.18484	-6.38239	2.61e-10	6.1e-09	12.9924		VLDLR	-0.722691	5.28639	-10.1312	4.43e-23	1.03e-21	41.5496		BACH1	0.206816	5.12951	8.2006	6.92e-16	1.61e-14	25.3505
EZH2	0.330159	6.25954	6.38186	2.62e-10	6.12e-09	12.9892		NEGR1	-0.676067	4.64503	-10.1312	4.43e-23	1.03e-21	41.5492		GATS	-0.478446	5.68171	-8.20044	6.93e-16	1.61e-14	25.3493
RNF150	-0.535967	5.64053	-6.37912	2.66e-10	6.21e-09	12.9726		FARSA	0.330705	6.55784	10.125	4.69e-23	1.09e-21	41.4925		GRPEL2	0.270928	6.6538	8.19299	7.34e-16	1.71e-14	25.2923
KNTC1	0.29397	6.66498	6.37759	2.69e-10	6.26e-09	12.9633		RPP38	0.287574	6.24023	10.1218	4.83e-23	1.12e-21	41.4632		PLXNA3	-0.411415	5.50517	-8.19175	7.42e-16	1.72e-14	25.2828
MRE11A	0.186115	5.25652	6.37674	2.7e-10	6.29e-09	12.9582		UHRF1	0.677816	7.22478	10.1215	4.84e-23	1.12e-21	41.4606		CCDC92	-0.429894	7.58011	-8.19154	7.43e-16	1.72e-14	25.2813
DTYMK	0.163312	5.09808	6.37598	2.72e-10	6.31e-09	12.9536		ZNF696	0.392176	5.71359	10.1208	4.87e-23	1.13e-21	41.4545		MALT1	0.330308	6.05047	8.1905	7.49e-16	1.73e-14	25.2733
ST5	-0.269099	6.50577	-6.37398	2.75e-10	6.38e-09	12.9415		NUP43	0.324877	7.12739	10.1194	4.94e-23	1.14e-21	41.4416		SHANK3	-0.50774	6.05484	-8.18901	7.58e-16	1.75e-14	25.2619
DNMT3B	0.306526	5.37273	6.37173	2.79e-10	6.46e-09	12.9279		BLM	0.539065	6.12366	10.1188	4.97e-23	1.15e-21	41.4356		IQGAP1	0.372853	8.08992	8.18819	7.63e-16	1.76e-14	25.2556
RFC2	0.232857	6.08967	6.37026	2.82e-10	6.51e-09	12.919		SYDE1	-0.433497	5.63521	-10.111	5.34e-23	1.23e-21	41.3642		ADAMDEC1	0.925559	6.82974	8.18697	7.7e-16	1.77e-14	25.2463
CLSTN1	-0.236102	7.83987	-6.36893	2.84e-10	6.55e-09	12.9109		MRC2	-0.40239	5.9481	-10.1093	5.42e-23	1.25e-21	41.3491		IMPAD1	0.299274	6.69816	8.1856	7.78e-16	1.79e-14	25.2358
SCN1B	-0.20378	5.07138	-6.36646	2.88e-10	6.64e-09	12.896		PLAT	-0.713835	7.3612	-10.1064	5.57e-23	1.28e-21	41.3226		PGM2	0.296172	7.06009	8.18283	7.95e-16	1.83e-14	25.2147
MTCH2	0.207809	6.81088	6.3592	3.02e-10	6.94e-09	12.8522		ST5	-0.432244	6.50577	-10.105	5.65e-23	1.3e-21	41.3089		NBEAL2	-0.442197	6.31066	-8.18122	8.05e-16	1.85e-14	25.2025
AMPH	-0.315662	5.14603	-6.35832	3.04e-10	6.97e-09	12.8469		HSPB6	-1.19957	5.67831	-10.1038	5.71e-23	1.31e-21	41.2982		SNW1	0.236556	6.97484	8.18094	8.07e-16	1.85e-14	25.2003
PSMA1	0.174752	8.87439	6.35723	3.06e-10	7.01e-09	12.8403		SUV39H2	0.358204	5.38796	10.1037	5.72e-23	1.31e-21	41.2973		KPNA2	0.460242	7.79885	8.17904	8.19e-16	1.87e-14	25.1858
HMGN2	0.227905	9.33764	6.35653	3.07e-10	7.03e-09	12.8361		ADSS	0.284941	7.10972	10.0993	5.96e-23	1.36e-21	41.2571		SLC6A8	-0.661324	6.33392	-8.17898	8.19e-16	1.87e-14	25.1853
CSTF3	0.207826	6.98482	6.35555	3.09e-10	7.06e-09	12.8301		PUS1	0.369549	6.90507	10.0892	6.54e-23	1.49e-21	41.1647		XRCC2	-0.612446	6.59178	-8.17723	8.31e-16	1.89e-14	25.172
FAM149A	-0.432511	5.42929	-6.355	3.1e-10	7.07e-09	12.8268		MRS2	0.36735	6.00647	10.0809	7.06e-23	1.61e-21	41.0891		MAP3K1	0.430771	7.38591	8.17721	8.31e-16	1.89e-14	25.1718
SLC25A32	0.215843	6.37326	6.35204	3.16e-10	7.19e-09	12.809		NKRF	0.328321	7.0166	10.0796	7.15e-23	1.63e-21	41.0769		PSMG1	0.412618	7.74119	8.17599	8.39e-16	1.91e-14	25.1626
RNASEH2A	0.309804	6.83784	6.34816	3.24e-10	7.36e-09	12.7855		FRZB	-0.960528	6.6238	-10.078	7.26e-23	1.65e-21	41.0625		GABBR1	-0.357799	5.19918	-8.16698	9e-16	2.04e-14	25.0938
GPR143	0.453557	4.27488	6.34523	3.29e-10	7.48e-09	12.7679		KCNE4	-0.475104	4.87794	-10.0777	7.28e-23	1.65e-21	41.0599		USP12	0.292598	5.46539	8.1663	9.05e-16	2.05e-14	25.0886
SNRPE	0.210127	6.3243	6.34372	3.33e-10	7.54e-09	12.7588		ZNF521	-0.683051	5.57713	-10.0776	7.28e-23	1.65e-21	41.0589		FBXO4	0.287791	5.28942	8.16324	9.26e-16	2.09e-14	25.0653
PMAIP1	0.470718	6.30127	6.34051	3.39e-10	7.69e-09	12.7395		TCOF1	0.20411	5.14081	10.0758	7.41e-23	1.68e-21	41.0419		BRF1	-0.251573	4.56489	-8.16296	9.28e-16	2.1e-14	25.0632
AEBP1	-0.55927	7.88789	-6.33717	3.47e-10	7.84e-09	12.7193		MRPL21	0.385298	7.83185	10.0713	7.72e-23	1.74e-21	41.0014		C18orf21	0.269976	6.26632	8.16237	9.33e-16	2.1e-14	25.0587
VEZF1	-0.232954	8.22468	-6.33556	3.5e-10	7.9e-09	12.7097		EED	0.342315	6.23885	10.0693	7.87e-23	1.77e-21	40.9825		CLP1	0.205089	6.37883	8.16161	9.38e-16	2.11e-14	25.0529
BHMT2	-0.350805	4.54357	-6.32555	3.73e-10	8.4e-09	12.6494		ERCC8	0.265877	4.79778	10.0686	7.92e-23	1.78e-21	40.976		SH2B2	-0.316348	5.47943	-8.16078	9.44e-16	2.12e-14	25.0466
ATIC	0.200359	8.87621	6.32314	3.78e-10	8.51e-09	12.635		CTSF	-0.635487	6.43742	-10.0625	8.38e-23	1.88e-21	40.9206		LIPA	0.522149	8.81652	8.16021	9.48e-16	2.13e-14	25.0423
ROR2	-0.482642	5.47058	-6.31741	3.92e-10	8.81e-09	12.6006		DUS4L	0.403616	6.18424	10.0617	8.44e-23	1.89e-21	40.9133		ADCY4	-0.596861	6.12766	-8.15799	9.65e-16	2.16e-14	25.0254
MRVI1	-0.409024	5.50496	-6.31192	4.06e-10	9.1e-09	12.5676		ASCC3	0.335118	6.47029	10.0571	8.81e-23	1.97e-21	40.871		ARPC3	0.341108	9.62996	8.15616	9.79e-16	2.19e-14	25.0114
CDCA8	0.440028	6.81364	6.31175	4.06e-10	9.1e-09	12.5667		FAM91A1	0.402175	6.61027	10.0553	8.96e-23	2e-21	40.8548		MS4A4A	0.553995	5.85666	8.15432	9.93e-16	2.22e-14	24.9975
RPA3	0.27494	8.65923	6.31013	4.1e-10	9.18e-09	12.5569		DLEU1	0.436387	6.25867	10.0509	9.33e-23	2.08e-21	40.8151		PIBF1	0.349382	6.31227	8.15374	9.97e-16	2.23e-14	24.993
RAD51	0.299917	5.70017	6.30319	4.28e-10	9.57e-09	12.5154		CBX6	-0.714281	7.12804	-10.0504	9.38e-23	2.09e-21	40.8099		CHAC2	0.489322	5.83	8.14812	1.04e-15	2.32e-14	24.9503
SGIP1	-0.382311	5.21709	-6.29978	4.37e-10	9.76e-09	12.4949		ACAT2	0.532769	7.07522	10.0458	9.78e-23	2.18e-21	40.7687		MEG3	-0.555458	5.17496	-8.1468	1.05e-15	2.34e-14	24.9402
HNRNPF	0.206368	7.13814	6.29941	4.38e-10	9.77e-09	12.4927		PDLIM3	-1.0328	6.9907	-10.0455	9.81e-23	2.18e-21	40.7656		TFEB	-0.291062	5.73021	-8.14656	1.05e-15	2.34e-14	24.9384
TCOF1	0.125906	5.14081	6.29725	4.44e-10	9.88e-09	12.4798		CSTF3	0.332782	6.98482	10.0443	9.92e-23	2.2e-21	40.7549		PRKCZ	-0.435583	6.74307	-8.14491	1.07e-15	2.37e-14	24.9258
LSM6	0.260753	6.71316	6.29676	4.46e-10	9.9e-09	12.4769		CDK2	0.351236	6.46703	10.0438	9.97e-23	2.21e-21	40.7498		TPCN1	-0.274198	5.5837	-8.14467	1.07e-15	2.37e-14	24.924
NKX2-3	-0.430212	4.65767	-6.29615	4.47e-10	9.92e-09	12.4732		LPP	-0.579865	8.40233	-10.0422	1.01e-22	2.24e-21	40.7357		TIFA	0.327516	5.34646	8.1427	1.09e-15	2.4e-14	24.909
MSRB3	-0.574295	6.34919	-6.29559	4.49e-10	9.94e-09	12.4698		CCT2	0.469171	9.06241	10.0365	1.07e-22	2.36e-21	40.6834		SCMH1	-0.336518	6.23302	-8.13482	1.16e-15	2.55e-14	24.8492
STMN1	0.272555	6.00522	6.29523	4.5e-10	9.95e-09	12.4677		A2M	-0.66006	8.27335	-10.0346	1.09e-22	2.4e-21	40.6661		WDR27	-0.296753	5.2282	-8.13367	1.17e-15	2.56e-14	24.8405
UPF3B	0.222117	6.56753	6.2912	4.61e-10	1.02e-08	12.4436		FOXF2	-0.802138	6.46411	-10.0297	1.14e-22	2.5e-21	40.6214		PRPSAP2	0.28661	7.29196	8.13362	1.17e-15	2.56e-14	24.8401
LSAMP	-0.365437	5.1497	-6.29108	4.62e-10	1.02e-08	12.4428		HMGA1	0.587971	7.23026	10.0283	1.15e-22	2.53e-21	40.6093		DHX29	0.243118	7.43461	8.12665	1.23e-15	2.7e-14	24.7871
TOMM34	0.285729	7.91476	6.28921	4.67e-10	1.03e-08	12.4317		GREM2	-0.884612	4.78958	-10.0204	1.24e-22	2.72e-21	40.5366		DDX3X	0.223782	7.73699	8.12439	1.25e-15	2.75e-14	24.7701
RCBTB2	-0.241566	5.86284	-6.28541	4.78e-10	1.05e-08	12.409		C2orf40	-1.74415	6.23862	-10.0158	1.29e-22	2.83e-21	40.4954		TMUB1	-0.451096	7.07407	-8.11998	1.3e-15	2.84e-14	24.7366
C14orf169	0.19277	6.85375	6.2786	4.99e-10	1.1e-08	12.3683		TBCE	0.361841	7.00158	10.0143	1.31e-22	2.87e-21	40.4817		CCT2	0.41663	9.06241	8.11344	1.36e-15	2.98e-14	24.687
TRNT1	0.203866	6.10685	6.27516	5.1e-10	1.12e-08	12.3478		HSP90AA1	0.249489	10.3791	10.0137	1.32e-22	2.88e-21	40.4764		TNFRSF25	-0.455452	5.72067	-8.1062	1.44e-15	3.15e-14	24.6322
CDC23	0.17302	7.10761	6.27489	5.11e-10	1.12e-08	12.3462		STOM	-0.553177	7.91867	-10.0109	1.35e-22	2.95e-21	40.4503		GRK4	-0.266446	4.05809	-8.10484	1.46e-15	3.18e-14	24.6219
TTC27	0.191109	6.79259	6.27435	5.12e-10	1.12e-08	12.343		LMNB2	0.528105	7.51714	10.0081	1.39e-22	3.02e-21	40.4251		CCDC84	-0.369884	6.59621	-8.09998	1.51e-15	3.29e-14	24.5851
C6orf211	0.222333	6.83354	6.27235	5.19e-10	1.13e-08	12.331		TLE4	-0.454039	5.7559	-10.0016	1.47e-22	3.21e-21	40.3663		SMC6	0.352134	5.7789	8.09975	1.52e-15	3.29e-14	24.5834
MSH6	0.217635	7.40455	6.27072	5.24e-10	1.14e-08	12.3214		MYL6	-0.226761	10.2362	-10.0005	1.49e-22	3.23e-21	40.3565		STOML1	-0.27995	5.84455	-8.09817	1.53e-15	3.33e-14	24.5714
FCER1A	-0.529388	4.99273	-6.26775	5.34e-10	1.16e-08	12.3036		CXorf56	0.349976	5.14633	9.99517	1.56e-22	3.39e-21	40.3078		MAPK8IP3	-0.368027	5.47924	-8.0913	1.62e-15	3.51e-14	24.5195
HIST1H2AB	0.252078	4.49919	6.26741	5.35e-10	1.16e-08	12.3016		CYC1	0.428287	9.39948	9.99321	1.59e-22	3.45e-21	40.29		STT3B	0.384299	7.95723	8.08872	1.65e-15	3.57e-14	24.5
TAF1B	0.198959	5.87173	6.26608	5.39e-10	1.17e-08	12.2937		SERPING1	-0.751459	7.49689	-9.99189	1.61e-22	3.49e-21	40.278		ARF4	0.266469	9.37817	8.08672	1.68e-15	3.62e-14	24.4849
NARS2	0.272851	7.10737	6.26193	5.53e-10	1.2e-08	12.269		GEN1	0.338785	4.79291	9.98882	1.66e-22	3.58e-21	40.2502		RUSC1	-0.280226	8.31441	-8.0799	1.77e-15	3.81e-14	24.4333
ERCC8	0.163173	4.79778	6.2608	5.57e-10	1.21e-08	12.2622		PLSCR4	-0.729908	6.95583	-9.98798	1.67e-22	3.6e-21	40.2425		PIGB	0.268751	6.44548	8.07825	1.79e-15	3.86e-14	24.4209
ZNF556	0.403362	4.28028	6.25879	5.64e-10	1.22e-08	12.2503		DACT3	-0.787025	6.25213	-9.98792	1.67e-22	3.6e-21	40.242		VPS37B	-0.441777	7.5823	-8.07216	1.88e-15	4.04e-14	24.3749
PDE2A	-0.343525	5.2477	-6.25492	5.78e-10	1.25e-08	12.2273		ZW10	0.293758	7.35538	9.98789	1.67e-22	3.6e-21	40.2417		CKLF	0.405088	7.85471	8.07194	1.88e-15	4.04e-14	24.3733
SLC27A1	-0.316046	6.48189	-6.25455	5.79e-10	1.25e-08	12.2251		ADD1	-0.30103	7.95321	-9.98036	1.79e-22	3.85e-21	40.1735		RNF185	-0.269541	6.28097	-8.07017	1.91e-15	4.09e-14	24.3599
COPZ2	-0.302369	5.57343	-6.25146	5.9e-10	1.27e-08	12.2067		RBPMS	-0.508024	5.94391	-9.97856	1.82e-22	3.91e-21	40.1571		PLXNB1	-0.520008	6.15243	-8.06481	1.99e-15	4.25e-14	24.3196
HNRNPA3P1	0.298832	4.3444	6.24834	6.02e-10	1.29e-08	12.1882		GGH	0.908859	7.57015	9.97486	1.88e-22	4.04e-21	40.1236		MKNK2	-0.32237	8.14621	-8.06279	2.02e-15	4.31e-14	24.3043
LARGE	-0.23846	5.86753	-6.24541	6.13e-10	1.31e-08	12.1707		OGN	-1.4466	5.58519	-9.96942	1.98e-22	4.24e-21	40.0743		SETD1B	-0.248244	6.66236	-8.06077	2.05e-15	4.38e-14	24.2891
ACTR1A	-0.168611	7.60836	-6.2424	6.24e-10	1.34e-08	12.1529		UTP6	0.337417	7.03228	9.96896	1.99e-22	4.25e-21	40.0702		DSCR3	0.350699	6.65269	8.06042	2.05e-15	4.38e-14	24.2865
CRISPLD1	-0.512473	5.42488	-6.23523	6.52e-10	1.39e-08	12.1104		DDX31	0.280512	5.41372	9.96787	2.01e-22	4.29e-21	40.0603		IKZF5	0.279368	5.92283	8.05906	2.08e-15	4.42e-14	24.2763
WDR76	0.209687	4.73924	6.23384	6.58e-10	1.4e-08	12.1021		EVL	-0.587777	7.43808	-9.96284	2.1e-22	4.48e-21	40.0147		CDK7	0.313184	7.5088	8.05592	2.13e-15	4.52e-14	24.2526
KIAA0020	0.236184	7.00217	6.23362	6.59e-10	1.4e-08	12.1008		DHFR	0.395482	5.96527	9.95939	2.17e-22	4.62e-21	39.9835		AZIN1	0.28493	8.43455	8.05296	2.18e-15	4.62e-14	24.2303
TMEM68	0.20945	5.65796	6.23263	6.63e-10	1.41e-08	12.095		PSMD13	0.248361	6.57593	9.95165	2.33e-22	4.96e-21	39.9135		NOTCH3	-0.484667	6.6562	-8.04834	2.25e-15	4.78e-14	24.1955
RBM12	0.141008	7.03223	6.23244	6.64e-10	1.41e-08	12.0938		OVOL1	0.480004	5.27642	9.94921	2.38e-22	5.06e-21	39.8914		FIGNL1	0.367854	6.13957	8.04816	2.26e-15	4.78e-14	24.1942
RRM2	0.458633	7.22488	6.2316	6.67e-10	1.41e-08	12.0889		ZSCAN18	-0.755242	6.48545	-9.94901	2.39e-22	5.06e-21	39.8896		MED30	0.368341	7.13925	8.04797	2.26e-15	4.78e-14	24.1927
EPB41	0.188839	5.13382	6.23152	6.67e-10	1.41e-08	12.0884		INCENP	0.497852	4.99982	9.94822	2.4e-22	5.09e-21	39.8825		CASP4	0.372424	6.51685	8.04539	2.31e-15	4.87e-14	24.1733
PCSK9	0.472364	5.55705	6.23132	6.68e-10	1.41e-08	12.0872		PSMA7	0.306154	6.87586	9.94781	2.41e-22	5.1e-21	39.8788		SH2D1A	0.517891	5.27351	8.04492	2.31e-15	4.88e-14	24.1698
CTDSP1	-0.219534	7.31989	-6.23088	6.7e-10	1.42e-08	12.0846		LDOC1	-0.750475	5.8313	-9.94122	2.56e-22	5.41e-21	39.8192		MTHFD2	0.409573	7.40165	8.04409	2.33e-15	4.9e-14	24.1636
UCHL3	0.280916	8.20302	6.23048	6.72e-10	1.42e-08	12.0822		ACTG2	-1.29357	8.65218	-9.94091	2.57e-22	5.42e-21	39.8164		SLC30A1	0.354836	6.43499	8.04316	2.35e-15	4.93e-14	24.1566
ARF6	0.205591	6.58937	6.22396	6.99e-10	1.47e-08	12.0436		TOPBP1	0.430395	7.48153	9.93728	2.66e-22	5.6e-21	39.7836		SEC23IP	0.28034	6.81635	8.04197	2.37e-15	4.97e-14	24.1476
CLN6	0.2005	5.27267	6.21609	7.34e-10	1.54e-08	11.997		PDE2A	-0.552919	5.2477	-9.93647	2.68e-22	5.63e-21	39.7762		TNRC6A	-0.235519	5.91051	-8.04194	2.37e-15	4.97e-14	24.1474
RNF6	0.138266	5.4549	6.21592	7.35e-10	1.54e-08	11.996		ARL6IP6	0.432967	6.47416	9.9345	2.73e-22	5.73e-21	39.7585		VAMP3	0.303663	8.47322	8.03959	2.41e-15	5.05e-14	24.1298
MRPL15	0.284698	8.68465	6.21473	7.4e-10	1.55e-08	11.989		NFE2L3	0.653361	7.19191	9.93052	2.83e-22	5.93e-21	39.7225		SMC3	0.287748	7.02937	8.03528	2.49e-15	5.21e-14	24.0974
NMI	0.307115	8.27389	6.21302	7.48e-10	1.57e-08	11.9789		PBX3	-0.659885	7.52903	-9.92991	2.84e-22	5.96e-21	39.717		IFT140	-0.281099	4.89551	-8.03409	2.52e-15	5.25e-14	24.0884
ACTR3B	0.204615	5.14501	6.20949	7.64e-10	1.6e-08	11.9581		NR2F2	-0.552612	6.88723	-9.92633	2.94e-22	6.15e-21	39.6847		RAP2C	0.330342	7.17223	8.03369	2.52e-15	5.26e-14	24.0854
RARS	0.194085	8.67744	6.20808	7.71e-10	1.61e-08	11.9497		EFHD1	-0.758782	6.13958	-9.92597	2.95e-22	6.16e-21	39.6814		IDE	0.29879	6.85038	8.03315	2.53e-15	5.28e-14	24.0814
HDC	-0.499437	5.58568	-6.20432	7.89e-10	1.65e-08	11.9275		CNN1	-1.55274	7.3314	-9.91054	3.4e-22	7.08e-21	39.5422		ECT2	0.552805	7.44764	8.02991	2.6e-15	5.4e-14	24.057
ARMCX2	-0.49413	6.85456	-6.20273	7.96e-10	1.66e-08	11.9182		ZMIZ1	-0.345336	7.52092	-9.90944	3.43e-22	7.15e-21	39.5323		SART1	-0.165347	5.28512	-8.02551	2.69e-15	5.58e-14	24.024
SEC16B	0.211361	4.70569	6.2016	8.02e-10	1.67e-08	11.9115		MEF2C	-0.597257	6.26794	-9.9019	3.68e-22	7.64e-21	39.4644		FBXW4	-0.280727	6.93863	-8.01825	2.84e-15	5.88e-14	23.9696
BLM	0.325858	6.12366	6.19739	8.23e-10	1.71e-08	11.8867		CYP2U1	-0.362997	5.11247	-9.8967	3.86e-22	8.01e-21	39.4176		ATP5C1	0.36338	9.24752	8.01808	2.84e-15	5.88e-14	23.9683
ICAM1	0.335917	5.70288	6.19702	8.25e-10	1.71e-08	11.8845		MTX2	0.295727	7.67565	9.88819	4.17e-22	8.64e-21	39.341		ANKRD36B	-0.528764	6.17453	-8.01808	2.84e-15	5.88e-14	23.9683
PLEKHH2	-0.303134	4.77087	-6.19301	8.45e-10	1.75e-08	11.8608		TROAP	0.561196	6.12325	9.88725	4.2e-22	8.7e-21	39.3325		RFX1	-0.279359	6.18815	-8.01789	2.85e-15	5.88e-14	23.9669
VASN	-0.349126	6.67915	-6.1929	8.46e-10	1.75e-08	11.8602		SLC22A17	-0.552028	5.09787	-9.88715	4.21e-22	8.7e-21	39.3316		INTS5	-0.265289	6.69583	-8.01583	2.89e-15	5.97e-14	23.9514
TAP2	0.292369	6.25787	6.19149	8.53e-10	1.76e-08	11.8519		ACTR5	0.329931	6.38701	9.88183	4.42e-22	9.12e-21	39.2837		SAAL1	0.320677	7.2278	8.01471	2.92e-15	6.01e-14	23.943
EID1	-0.277674	6.74875	-6.18993	8.61e-10	1.78e-08	11.8427		LMOD1	-1.15266	5.87011	-9.88095	4.45e-22	9.18e-21	39.2758		GTF2H1	0.278539	6.36215	8.01369	2.94e-15	6.05e-14	23.9354
PAPOLA	0.173686	8.35	6.18718	8.76e-10	1.81e-08	11.8265		PALLD	-0.691587	8.54488	-9.87747	4.6e-22	9.46e-21	39.2446		FAIM	0.364963	6.06726	8.01297	2.96e-15	6.08e-14	23.93
GINS3	0.25836	6.06504	6.18533	8.86e-10	1.82e-08	11.8156		NUAK1	-0.548633	7.16589	-9.87242	4.81e-22	9.9e-21	39.1992		CDK5RAP3	-0.392469	7.8591	-8.00937	3.04e-15	6.23e-14	23.903
TGDS	0.216773	6.64285	6.18376	8.95e-10	1.84e-08	11.8064		NFIC	-0.495528	6.33169	-9.87023	4.91e-22	1.01e-20	39.1795		PEX3	0.261835	5.49305	8.00926	3.04e-15	6.23e-14	23.9022
DENND2A	-0.336716	5.43176	-6.18329	8.97e-10	1.84e-08	11.8036		GPD2	0.328552	5.54002	9.86889	4.97e-22	1.02e-20	39.1675		PICALM	0.257451	7.44878	8.00853	3.06e-15	6.26e-14	23.8967
CPNE9	0.271273	4.58094	6.18196	9.05e-10	1.86e-08	11.7958		PSMA3	0.355942	7.44469	9.86871	4.98e-22	1.02e-20	39.1659		PMAIP1	0.66167	6.30127	8.00785	3.08e-15	6.28e-14	23.8916
SFRP1	-0.713983	5.52029	-6.18172	9.06e-10	1.86e-08	11.7943		KIT	-0.837525	6.39182	-9.86849	4.99e-22	1.02e-20	39.1638		ZBTB6	0.36288	4.88973	8.00765	3.08e-15	6.29e-14	23.8901
NFE2L1	-0.186054	8.06126	-6.17572	9.4e-10	1.92e-08	11.7591		BRCC3	0.378229	6.80831	9.86419	5.19e-22	1.06e-20	39.1253		DLG1	0.22594	5.47306	8.00732	3.09e-15	6.29e-14	23.8877
BATF2	0.432972	6.11024	6.17555	9.41e-10	1.92e-08	11.7581		MMRN1	-0.827512	5.02978	-9.86362	5.22e-22	1.06e-20	39.1202		AGPAT1	-0.258309	6.51562	-8.00521	3.14e-15	6.39e-14	23.8719
SNX33	-0.178507	6.23605	-6.17408	9.49e-10	1.94e-08	11.7495		CCDC107	-0.373563	6.04411	-9.85935	5.42e-22	1.1e-20	39.0819		SSU72	-0.270305	8.81177	-8.0015	3.23e-15	6.56e-14	23.844
NR2F2	-0.339179	6.88723	-6.17292	9.56e-10	1.95e-08	11.7427		ISL1	-0.929769	6.90339	-9.85206	5.79e-22	1.18e-20	39.0164		SUB1	0.344189	8.15227	8.001	3.24e-15	6.58e-14	23.8403
SLC5A6	0.294758	7.24802	6.17189	9.62e-10	1.96e-08	11.7366		SUPV3L1	0.348632	6.80193	9.84097	6.41e-22	1.3e-20	38.917		ZNF34	-0.361298	5.57495	-7.99899	3.29e-15	6.67e-14	23.8253
ACTR6	0.207734	7.00167	6.17113	9.66e-10	1.96e-08	11.7321		MYLK	-0.995835	6.92261	-9.83582	6.72e-22	1.36e-20	38.8709		PRKD3	0.292387	5.27939	7.99771	3.33e-15	6.72e-14	23.8157
HSPB2	-0.46056	5.23064	-6.1695	9.76e-10	1.98e-08	11.7226		ARMCX2	-0.793829	6.85456	-9.83503	6.77e-22	1.37e-20	38.8637		STK36	-0.408524	6.99819	-7.99767	3.33e-15	6.72e-14	23.8154
NANP	0.190788	5.95899	6.16832	9.83e-10	1.99e-08	11.7156		MRE11A	0.290728	5.25652	9.83128	7e-22	1.42e-20	38.8301		MRPL18	0.285854	8.66959	7.98637	3.63e-15	7.32e-14	23.731
GLMN	0.221094	6.28389	6.16656	9.94e-10	2.01e-08	11.7053		ZFYVE1	-0.196213	5.55587	-9.82697	7.28e-22	1.47e-20	38.7916		ZNF273	0.220772	4.95939	7.98611	3.63e-15	7.32e-14	23.729
CUL4A	0.188234	7.39908	6.16597	9.97e-10	2.01e-08	11.7018		MRPS12	0.377604	6.98709	9.82202	7.62e-22	1.54e-20	38.7473		OSBPL5	-0.395426	6.32619	-7.98278	3.73e-15	7.5e-14	23.7041
LAP3	0.33649	8.59762	6.16503	1e-09	2.02e-08	11.6963		H2AFX	0.460398	6.069	9.81456	8.15e-22	1.64e-20	38.6806		ARHGEF2	-0.306236	7.40699	-7.98196	3.75e-15	7.54e-14	23.698
ZIM3	0.299329	3.53046	6.16483	1e-09	2.02e-08	11.6952		PTGDS	-1.07839	7.2246	-9.81413	8.18e-22	1.65e-20	38.6767		VPS13D	-0.198199	5.22437	-7.98176	3.76e-15	7.54e-14	23.6965
POP1	0.264994	5.60624	6.16439	1.01e-09	2.03e-08	11.6926		HTRA1	-0.693525	8.49241	-9.81262	8.3e-22	1.67e-20	38.6632		DEPDC1B	0.605902	6.14425	7.97439	3.97e-15	7.97e-14	23.6415
PAK3	-0.275239	4.56076	-6.16283	1.02e-09	2.04e-08	11.6834		FILIP1	-0.75811	5.2144	-9.8115	8.38e-22	1.68e-20	38.6533		IRF2BP1	-0.425873	5.80593	-7.97313	4.01e-15	8.03e-14	23.6321
TTLL4	0.226392	5.48837	6.15948	1.04e-09	2.08e-08	11.6638		CHAF1A	0.34638	5.44028	9.80969	8.52e-22	1.71e-20	38.6371		SOCS6	0.330423	5.70936	7.97073	4.09e-15	8.17e-14	23.6142
HSPB6	-0.721718	5.67831	-6.15915	1.04e-09	2.08e-08	11.6619		NPDC1	-0.651095	6.46594	-9.80108	9.21e-22	1.84e-20	38.5601		BTN3A3	0.468661	6.49302	7.97044	4.1e-15	8.18e-14	23.612
FGF7	-0.344009	4.45877	-6.15155	1.09e-09	2.18e-08	11.6173		COLEC12	-0.855463	5.97103	-9.79846	9.43e-22	1.89e-20	38.5367		ZNF160	-0.348538	5.89965	-7.96557	4.25e-15	8.47e-14	23.5757
RERG	-0.558603	5.855	-6.14743	1.12e-09	2.23e-08	11.5932		MRAS	-0.431273	5.4376	-9.79592	9.65e-22	1.93e-20	38.5141		PNO1	0.292187	6.90517	7.96529	4.26e-15	8.48e-14	23.5736
MMP12	0.885979	7.54478	6.1471	1.12e-09	2.23e-08	11.5912		NFATC4	-0.292197	4.77644	-9.78704	1.05e-21	2.09e-20	38.4348		MAPRE1	0.285225	8.97111	7.96163	4.38e-15	8.71e-14	23.5464
BEX4	-0.497468	6.34223	-6.14576	1.13e-09	2.25e-08	11.5834		C14orf28	-0.431869	5.84182	-9.78369	1.08e-21	2.15e-20	38.4049		RGS18	0.48074	5.40408	7.95631	4.56e-15	9.06e-14	23.5068
IQSEC1	-0.20604	6.49294	-6.1453	1.13e-09	2.25e-08	11.5807		C10orf54	-0.456473	6.50163	-9.78332	1.08e-21	2.15e-20	38.4016		FBXL3	0.293617	6.42792	7.95429	4.63e-15	9.19e-14	23.4917
IPMK	0.218955	4.68531	6.145	1.13e-09	2.25e-08	11.579		GABARAPL1	-0.52848	6.79604	-9.78287	1.09e-21	2.16e-20	38.3976		CPLX1	-0.692081	5.31757	-7.95233	4.7e-15	9.31e-14	23.4771
GNG7	-0.280357	5.27704	-6.14228	1.15e-09	2.29e-08	11.5631		PDRG1	0.363289	7.17609	9.78204	1.09e-21	2.17e-20	38.3902		STX11	0.473509	5.2425	7.94806	4.86e-15	9.61e-14	23.4453
KCNJ8	-0.41268	6.24779	-6.14087	1.16e-09	2.3e-08	11.5548		SLC25A32	0.336771	6.37326	9.78177	1.1e-21	2.17e-20	38.3878		TM2D1	0.24497	7.23707	7.94746	4.88e-15	9.64e-14	23.4409
SDPR	-0.532785	6.3099	-6.14062	1.16e-09	2.3e-08	11.5534		FBL	0.375884	9.11522	9.77868	1.13e-21	2.23e-20	38.3603		UBA3	0.38695	7.5064	7.94395	5.01e-15	9.89e-14	23.4148
CIAPIN1	0.189459	6.51378	6.13874	1.18e-09	2.33e-08	11.5424		GTSE1	0.46485	5.86054	9.77825	1.13e-21	2.24e-20	38.3564		XRCC5	0.302039	7.58607	7.94336	5.03e-15	9.92e-14	23.4103
TFB2M	0.235293	6.61048	6.13483	1.21e-09	2.38e-08	11.5195		TPM1	-0.655101	8.29266	-9.77256	1.19e-21	2.35e-20	38.3057		YAP1	0.471057	8.0741	7.94212	5.08e-15	1e-13	23.4011
ADCY4	-0.403172	6.12766	-6.13323	1.22e-09	2.4e-08	11.5102		MYOCD	-0.834699	5.39598	-9.76841	1.24e-21	2.44e-20	38.2688		SLC25A32	0.300341	6.37326	7.94148	5.11e-15	1e-13	23.3963
GNG11	-0.396566	6.92409	-6.1277	1.26e-09	2.48e-08	11.4779		ANGPTL2	-0.787226	7.16834	-9.76147	1.32e-21	2.59e-20	38.207		ACTR3	0.338805	8.46272	7.94145	5.11e-15	1e-13	23.3961
MMP2	-0.322598	6.03336	-6.12767	1.26e-09	2.48e-08	11.4778		ARHGAP20	-0.434264	4.71644	-9.7598	1.34e-21	2.63e-20	38.1921		PANK2	0.227574	6.41819	7.93521	5.36e-15	1.05e-13	23.3498
GTF2F2	0.231594	7.4882	6.12406	1.29e-09	2.53e-08	11.4567		NXT2	0.493298	6.45157	9.75829	1.36e-21	2.66e-20	38.1786		CNBP	0.268937	8.8501	7.92858	5.63e-15	1.1e-13	23.3005
OGN	-0.876995	5.58519	-6.12367	1.29e-09	2.53e-08	11.4544		TCEB1	0.326946	8.32212	9.7577	1.36e-21	2.67e-20	38.1734		USF2	-0.263943	6.91745	-7.92832	5.64e-15	1.1e-13	23.2986
SERPINF1	-0.510771	7.51391	-6.12211	1.3e-09	2.55e-08	11.4453		PEG3	-0.739516	4.99117	-9.75482	1.4e-21	2.74e-20	38.1478		NUMA1	-0.314758	6.12189	-7.92502	5.79e-15	1.13e-13	23.2741
FARP1	-0.27702	6.1071	-6.12049	1.31e-09	2.57e-08	11.4359		PKD2	-0.607514	6.69599	-9.75417	1.41e-21	2.75e-20	38.142		MYC	0.543683	8.03937	7.9211	5.96e-15	1.16e-13	23.245
ABCB10	0.240698	6.91382	6.11764	1.34e-09	2.61e-08	11.4193		SGOL1	0.44882	4.90494	9.75283	1.43e-21	2.78e-20	38.1301		FAS	0.492875	5.86866	7.92032	6e-15	1.17e-13	23.2392
TSPAN6	0.382602	7.34488	6.11754	1.34e-09	2.61e-08	11.4187		ZNF138	0.292303	4.96368	9.75138	1.44e-21	2.82e-20	38.1171		TBL1XR1	0.322833	6.84011	7.91986	6.02e-15	1.17e-13	23.2359
SHC4	-0.296092	4.53245	-6.11663	1.35e-09	2.62e-08	11.4134		BCL2L12	0.435604	6.61738	9.74689	1.5e-21	2.93e-20	38.0773		GOPC	0.276302	6.33195	7.91922	6.05e-15	1.17e-13	23.2311
LARP4	0.200992	6.51339	6.11463	1.36e-09	2.65e-08	11.4017		CCDC86	0.425111	7.16034	9.7428	1.56e-21	3.04e-20	38.0409		ZNHIT3	0.271796	7.95781	7.91908	6.05e-15	1.17e-13	23.2301
SLC22A17	-0.336889	5.09787	-6.11351	1.37e-09	2.67e-08	11.3952		TSHZ2	-0.666145	5.84868	-9.73993	1.6e-21	3.11e-20	38.0154		ZDHHC20	0.306139	6.35305	7.91335	6.32e-15	1.22e-13	23.1876
EXOSC4	0.238549	7.08112	6.1132	1.37e-09	2.67e-08	11.3934		GTF2F2	0.373148	7.4882	9.73868	1.62e-21	3.14e-20	38.0043		ORAI3	-0.297012	6.07709	-7.9132	6.33e-15	1.22e-13	23.1865
CAV1	-0.53169	8.14852	-6.11244	1.38e-09	2.68e-08	11.389		GTF2H3	0.318707	6.67173	9.73819	1.63e-21	3.15e-20	37.9999		ITSN1	-0.308757	5.75328	-7.91298	6.34e-15	1.23e-13	23.1848
CENPO	0.191622	5.15466	6.11213	1.38e-09	2.68e-08	11.3872		MXRA7	-0.63277	6.85225	-9.73456	1.68e-21	3.25e-20	37.9677		FHOD1	-0.318373	6.54871	-7.90917	6.53e-15	1.26e-13	23.1566
FAM127A	-0.361275	7.98639	-6.11109	1.39e-09	2.69e-08	11.3811		FRY	-0.422604	5.16979	-9.73338	1.7e-21	3.28e-20	37.9572		DNAJC10	0.293565	7.30825	7.90528	6.72e-15	1.3e-13	23.1278
TPM2	-0.545474	7.99491	-6.10843	1.41e-09	2.73e-08	11.3657		IGFBP4	-0.801732	8.22423	-9.73292	1.71e-21	3.29e-20	37.9531		PANK4	-0.265779	6.00654	-7.90471	6.75e-15	1.3e-13	23.1236
APOD	-0.891721	7.46602	-6.10786	1.42e-09	2.74e-08	11.3623		C1QTNF7	-0.737227	4.74487	-9.73283	1.71e-21	3.29e-20	37.9524		CASP6	0.364468	6.91474	7.90427	6.77e-15	1.3e-13	23.1203
DAAM2	-0.40913	5.78324	-6.10388	1.45e-09	2.8e-08	11.3392		PRMT2	-0.299843	6.39254	-9.73098	1.74e-21	3.34e-20	37.9359		FBXO3	0.233235	5.66969	7.9019	6.9e-15	1.32e-13	23.1028
ADRA2B	0.247502	4.91058	6.10336	1.46e-09	2.81e-08	11.3362		LAMA4	-0.531335	6.26015	-9.73074	1.74e-21	3.35e-20	37.9337		LIN7C	0.347731	6.70127	7.89933	7.03e-15	1.35e-13	23.0837
DHFR	0.2392	5.96527	6.10323	1.46e-09	2.81e-08	11.3354		C16orf59	0.611363	5.28825	9.73034	1.75e-21	3.35e-20	37.9302		MED16	-0.246581	6.85289	-7.89813	7.1e-15	1.36e-13	23.0749
CDC20	0.482505	7.96933	6.10288	1.46e-09	2.81e-08	11.3334		DPT	-0.985936	5.521	-9.72806	1.78e-21	3.42e-20	37.91		NUFIP1	0.252628	5.57421	7.89305	7.37e-15	1.41e-13	23.0373
PDIA3	0.177395	6.58565	6.10036	1.49e-09	2.85e-08	11.3188		SLC16A2	-0.622431	5.61089	-9.72491	1.83e-21	3.51e-20	37.882		SNTA1	-0.34927	6.04752	-7.89131	7.47e-15	1.43e-13	23.0245
ZNF138	0.180461	4.96368	6.09973	1.49e-09	2.85e-08	11.3151		RABAC1	-0.408688	8.64596	-9.72444	1.84e-21	3.52e-20	37.8779		PDIA6	0.35589	8.46077	7.88912	7.6e-15	1.45e-13	23.0083
HSPB7	-0.617756	5.27146	-6.09911	1.5e-09	2.86e-08	11.3115		PALB2	0.315101	6.40945	9.72412	1.85e-21	3.53e-20	37.875		VPS18	-0.260829	6.0233	-7.88805	7.66e-15	1.46e-13	23.0004
ISCU	-0.214537	8.89805	-6.09732	1.51e-09	2.89e-08	11.3011		MFAP5	-1.07548	6.67668	-9.72103	1.9e-21	3.62e-20	37.8476		PSMA2	0.264296	8.03383	7.88615	7.77e-15	1.48e-13	22.9863
PAM	-0.32568	9.14268	-6.09494	1.53e-09	2.93e-08	11.2873		TRIB3	0.847261	6.27177	9.7195	1.93e-21	3.67e-20	37.834		CLEC2D	0.385197	6.70292	7.88534	7.82e-15	1.49e-13	22.9803
NAE1	0.181119	8.21131	6.0936	1.55e-09	2.95e-08	11.2795		KLF2	-0.568063	8.16639	-9.71615	1.98e-21	3.78e-20	37.8043		YPEL3	-0.386274	6.76717	-7.88472	7.85e-15	1.49e-13	22.9758
EFEMP1	-0.554013	6.74506	-6.09172	1.56e-09	2.97e-08	11.2686		SCARA5	-0.820645	5.03936	-9.71196	2.06e-21	3.92e-20	37.7672		NCAPH	0.566761	5.40824	7.88387	7.9e-15	1.5e-13	22.9695
TCEB1	0.201452	8.32212	6.09167	1.57e-09	2.97e-08	11.2683		COL18A1	-0.504745	6.95593	-9.7103	2.09e-21	3.97e-20	37.7525		LEPRE1	-0.358254	6.51702	-7.88273	7.97e-15	1.51e-13	22.9611
FSTL1	-0.403829	7.78921	-6.09094	1.57e-09	2.98e-08	11.2641		RRAS	-0.5472	8.04576	-9.70263	2.24e-21	4.25e-20	37.6845		KIF18A	0.471935	5.41412	7.88158	8.04e-15	1.52e-13	22.9526
SOD3	-0.453712	6.01207	-6.08608	1.62e-09	3.07e-08	11.2359		C1RL	-0.386388	6.4971	-9.69763	2.35e-21	4.44e-20	37.6402		DEAF1	-0.26682	5.4128	-7.87965	8.16e-15	1.54e-13	22.9383
HIST1H3G	0.434231	5.24468	6.08507	1.63e-09	3.08e-08	11.23		CCNI	-0.293387	9.63159	-9.69339	2.44e-21	4.6e-20	37.6028		CACYBP	0.294242	7.24039	7.87925	8.19e-15	1.54e-13	22.9353
CCDC43	0.195956	6.5671	6.08118	1.67e-09	3.15e-08	11.2075		SOX17	-0.442687	4.95279	-9.6933	2.44e-21	4.6e-20	37.6019		TTC7A	-0.291579	5.29409	-7.87682	8.34e-15	1.57e-13	22.9174
LTV1	0.245509	6.72319	6.08025	1.68e-09	3.17e-08	11.2021		MRPL50	0.42461	7.54862	9.69167	2.47e-21	4.67e-20	37.5875		FAM109A	-0.480252	6.28195	-7.87652	8.36e-15	1.57e-13	22.9152
COL4A5	-0.519979	5.77766	-6.0793	1.69e-09	3.18e-08	11.1966		GEMIN6	0.314597	6.91567	9.6914	2.48e-21	4.67e-20	37.5851		MCTS1	0.400569	6.84251	7.87405	8.51e-15	1.6e-13	22.897
PDSS1	0.291122	6.3704	6.0787	1.69e-09	3.19e-08	11.1931		EXOSC5	0.460919	6.89153	9.68979	2.52e-21	4.73e-20	37.5709		ZBTB38	0.258724	6.11764	7.87164	8.67e-15	1.63e-13	22.8792
LGALS1	-0.3882	9.82774	-6.07844	1.7e-09	3.19e-08	11.1916		KIAA1804	0.581002	6.04026	9.68878	2.54e-21	4.77e-20	37.562		MRPS35	0.458026	8.35977	7.87055	8.74e-15	1.64e-13	22.8712
KLF2	-0.350619	8.16639	-6.07612	1.72e-09	3.23e-08	11.1782		WDR4	0.366744	6.25004	9.68198	2.7e-21	5.06e-20	37.5018		CRADD	0.297341	6.54136	7.86694	8.98e-15	1.68e-13	22.8445
POLR1C	0.255917	7.41902	6.07487	1.73e-09	3.25e-08	11.1709		ZNF423	-0.712084	5.52366	-9.68196	2.7e-21	5.06e-20	37.5016		RBX1	0.251721	8.86667	7.86251	9.29e-15	1.74e-13	22.8119
COL16A1	-0.47919	7.18415	-6.07407	1.74e-09	3.26e-08	11.1663		LRCH2	-0.609009	5.14046	-9.67943	2.76e-21	5.17e-20	37.4792		PPP2R3C	0.285709	6.6791	7.86139	9.37e-15	1.75e-13	22.8036
SNW1	0.157751	6.97484	6.07198	1.76e-09	3.3e-08	11.1543		RCBTB2	-0.376863	5.86284	-9.67806	2.8e-21	5.23e-20	37.4671		HMGB2	0.403993	7.85954	7.85999	9.47e-15	1.77e-13	22.7933
HCFC1R1	-0.266461	7.24321	-6.07009	1.78e-09	3.33e-08	11.1433		C1R	-0.774234	7.46849	-9.67655	2.83e-21	5.29e-20	37.4538		PRIM2	0.343418	5.16202	7.85951	9.5e-15	1.77e-13	22.7898
MPHOSPH9	0.206601	5.49121	6.06966	1.79e-09	3.34e-08	11.1408		SELP	-0.590355	5.62723	-9.67343	2.91e-21	5.43e-20	37.4262		PIAS4	-0.306727	6.8238	-7.85814	9.6e-15	1.79e-13	22.7797
C16orf59	0.376351	5.28825	6.06897	1.79e-09	3.35e-08	11.1368		CYGB	-0.524326	6.51947	-9.67322	2.92e-21	5.44e-20	37.4244		ANXA3	0.683517	7.4784	7.85594	9.76e-15	1.81e-13	22.7635
ARHGAP11A	0.289973	4.80154	6.06773	1.81e-09	3.37e-08	11.1296		LRP8	0.592602	5.64992	9.67306	2.92e-21	5.44e-20	37.423		TMEM128	0.341624	6.28391	7.85573	9.78e-15	1.81e-13	22.7619
ZNF540	-0.265775	4.45102	-6.067	1.82e-09	3.38e-08	11.1254		FNBP1	-0.670226	7.34197	-9.66285	3.2e-21	5.95e-20	37.3328		SPECC1L	-0.320313	7.72814	-7.85418	9.89e-15	1.83e-13	22.7505
RNFT1	0.282399	5.85731	6.06523	1.84e-09	3.41e-08	11.1152		DCLRE1B	0.287727	5.45169	9.6581	3.34e-21	6.21e-20	37.2909		RNF13	0.283338	7.56843	7.85094	1.01e-14	1.88e-13	22.7267
RASGEF1B	0.25316	4.20811	6.06392	1.85e-09	3.43e-08	11.1077		ESPL1	0.480565	6.16959	9.64843	3.65e-21	6.76e-20	37.2056		ARF6	0.288578	6.58937	7.84944	1.02e-14	1.89e-13	22.7157
RBPMS	-0.304585	5.94391	-6.06156	1.88e-09	3.48e-08	11.094		AMD1	0.331276	7.95434	9.64657	3.71e-21	6.86e-20	37.1892		CHST10	-0.346537	5.5156	-7.84935	1.03e-14	1.89e-13	22.715
CTDSPL	-0.223848	7.28076	-6.0613	1.88e-09	3.48e-08	11.0925		LYPLA1	0.454961	7.43951	9.64389	3.8e-21	7.02e-20	37.1656		BAP1	-0.263537	6.12841	-7.84834	1.03e-14	1.91e-13	22.7075
ILK	-0.274403	8.13932	-6.05772	1.92e-09	3.55e-08	11.0719		SLC29A2	0.48523	5.58685	9.64109	3.89e-21	7.19e-20	37.1409		OCLN	0.456404	5.71821	7.84646	1.05e-14	1.93e-13	22.6937
LDB2	-0.355195	6.62611	-6.05677	1.93e-09	3.57e-08	11.0664		FAM124B	-0.578656	4.93332	-9.63735	4.03e-21	7.43e-20	37.1079		COG3	0.31119	6.13238	7.84514	1.06e-14	1.95e-13	22.684
IL11RA	-0.299893	5.62844	-6.05574	1.94e-09	3.58e-08	11.0604		PRPF4	0.309857	7.70962	9.63128	4.25e-21	7.83e-20	37.0546		HMMR	0.613247	7.09335	7.84509	1.06e-14	1.95e-13	22.6837
WFDC1	-0.54592	6.42815	-6.05474	1.95e-09	3.6e-08	11.0547		FAM149A	-0.664099	5.42929	-9.63071	4.27e-21	7.86e-20	37.0495		FAM3A	-0.339829	7.37306	-7.8434	1.07e-14	1.97e-13	22.6712
CDC6	0.400169	5.47886	6.05446	1.96e-09	3.6e-08	11.053		FRMD6	-0.70334	6.65891	-9.63011	4.3e-21	7.89e-20	37.0443		ARL8B	0.252032	8.21753	7.84184	1.09e-14	1.99e-13	22.6598
TXNDC9	0.240174	7.21405	6.0541	1.96e-09	3.61e-08	11.0509		LRRC17	-0.603583	4.97884	-9.62014	4.7e-21	8.62e-20	36.9565		SNX10	0.594564	6.84078	7.83968	1.1e-14	2.02e-13	22.6439
POLR2D	0.225568	6.41269	6.05198	1.99e-09	3.65e-08	11.0387		STOX2	-0.623286	5.51435	-9.61888	4.75e-21	8.71e-20	36.9455		PIK3AP1	0.493718	6.37027	7.83753	1.12e-14	2.05e-13	22.628
RBM26	0.182373	5.87686	6.05049	2.01e-09	3.68e-08	11.0301		MMP2	-0.513003	6.03336	-9.61747	4.81e-21	8.8e-20	36.9331		GLRX	0.480199	7.79199	7.83525	1.14e-14	2.08e-13	22.6113
CLPX	0.182973	7.16966	6.04951	2.02e-09	3.69e-08	11.0245		RPE	0.3075	6.34212	9.61726	4.82e-21	8.8e-20	36.9312		GOLGA1	-0.236237	6.15236	-7.83393	1.15e-14	2.1e-13	22.6016
CTLA4	0.291296	5.03876	6.04704	2.05e-09	3.74e-08	11.0103		E2F5	0.610464	6.5536	9.61723	4.82e-21	8.8e-20	36.9309		LTBP4	-0.478429	6.04381	-7.83342	1.16e-14	2.11e-13	22.5979
VIM	-0.352959	9.03382	-6.04644	2.05e-09	3.75e-08	11.0068		LTBP4	-0.534572	6.04381	-9.61471	4.93e-21	8.99e-20	36.9088		NRM	-0.318812	6.34022	-7.83328	1.16e-14	2.11e-13	22.5969
GPR146	-0.255101	4.58514	-6.04624	2.06e-09	3.75e-08	11.0056		RECK	-0.457563	5.64636	-9.61298	5.01e-21	9.12e-20	36.8936		SEC24B	0.197132	6.83457	7.83194	1.17e-14	2.12e-13	22.587
GLRX2	0.187528	6.88237	6.0454	2.07e-09	3.76e-08	11.0008		NEXN	-0.957649	6.78967	-9.6094	5.17e-21	9.4e-20	36.8622		IL11RA	-0.431406	5.62844	-7.82705	1.21e-14	2.2e-13	22.5511
TMEM184B	-0.196471	7.28272	-6.04532	2.07e-09	3.76e-08	11.0003		CALD1	-0.744756	7.84106	-9.60931	5.17e-21	9.4e-20	36.8613		TLR4	0.430292	5.20812	7.8258	1.22e-14	2.22e-13	22.5419
MIPEP	0.24887	6.84341	6.04494	2.07e-09	3.76e-08	10.9981		SNRK	-0.318782	6.99251	-9.60871	5.2e-21	9.44e-20	36.8561		SH3PXD2A	-0.430683	7.35964	-7.82557	1.23e-14	2.22e-13	22.5403
TUBB6	-0.406606	7.23752	-6.0449	2.07e-09	3.76e-08	10.9979		PCOLCE	-0.853608	7.02911	-9.60627	5.32e-21	9.64e-20	36.8346		C1orf86	-0.246546	5.88833	-7.82125	1.27e-14	2.29e-13	22.5086
TMTC1	-0.35176	5.38102	-6.04432	2.08e-09	3.77e-08	10.9946		C1orf74	0.315564	5.34436	9.60405	5.42e-21	9.82e-20	36.8152		ZCCHC4	0.233845	4.49153	7.82001	1.28e-14	2.31e-13	22.4994
PIK3IP1	-0.297967	6.87034	-6.04324	2.09e-09	3.79e-08	10.9884		NOB1	0.343887	6.70801	9.60112	5.57e-21	1.01e-19	36.7894		ZNF827	-0.460441	6.37899	-7.81779	1.3e-14	2.35e-13	22.4832
HSD17B6	-0.464315	5.42063	-6.04257	2.1e-09	3.8e-08	10.9845		FGFR1OP	0.368325	6.00017	9.60022	5.61e-21	1.01e-19	36.7816		ATAD1	0.323375	7.13848	7.81506	1.33e-14	2.39e-13	22.4631
TMEM62	0.243655	6.88608	6.04084	2.12e-09	3.84e-08	10.9745		SHC2	-0.353382	5.46628	-9.59985	5.63e-21	1.02e-19	36.7783		API5	0.258611	7.36057	7.81461	1.33e-14	2.4e-13	22.4599
AXL	-0.334331	6.83248	-6.0401	2.13e-09	3.85e-08	10.9703		SCARA3	-0.572616	4.97259	-9.59922	5.66e-21	1.02e-19	36.7728		CLEC4A	0.535623	5.69752	7.81386	1.34e-14	2.41e-13	22.4543
ERH	0.179627	9.11778	6.03775	2.16e-09	3.9e-08	10.9568		WFDC1	-0.876432	6.42815	-9.59383	5.94e-21	1.07e-19	36.7254		CTSS	0.472635	7.37424	7.81302	1.35e-14	2.42e-13	22.4482
METTL5	0.220834	7.66882	6.03706	2.17e-09	3.91e-08	10.9528		ZNF781	-0.366008	4.01442	-9.5931	5.98e-21	1.07e-19	36.719		LSM3	0.317031	7.90827	7.81093	1.37e-14	2.45e-13	22.4329
ACTG2	-0.775178	8.65218	-6.03574	2.19e-09	3.94e-08	10.9452		KIF20A	0.655613	6.66731	9.5919	6.04e-21	1.09e-19	36.7085		C1GALT1C1	0.299244	6.67107	7.8092	1.39e-14	2.48e-13	22.4202
CX3CR1	-0.360296	4.78361	-6.03467	2.2e-09	3.96e-08	10.939		EMCN	-0.585583	5.86276	-9.59124	6.08e-21	1.09e-19	36.7027		MRPL16	0.316445	7.35262	7.80689	1.41e-14	2.52e-13	22.4034
FAM101B	-0.233539	6.08716	-6.03192	2.24e-09	4.02e-08	10.9232		PAFAH1B3	0.521989	7.5216	9.58729	6.3e-21	1.13e-19	36.6681		PSMD6	0.253354	7.71055	7.80401	1.44e-14	2.58e-13	22.3823
MORC4	0.27858	6.29803	6.03043	2.26e-09	4.05e-08	10.9146		LIG1	0.437224	6.58284	9.58689	6.32e-21	1.13e-19	36.6646		ITFG1	0.32331	7.00793	7.80317	1.45e-14	2.59e-13	22.3761
MRPS28	0.25447	7.68611	6.02981	2.27e-09	4.06e-08	10.9111		XPO5	0.447873	6.66826	9.58242	6.58e-21	1.18e-19	36.6254		R3HDM2	-0.244856	6.5119	-7.80218	1.46e-14	2.61e-13	22.3689
FRMD6	-0.434617	6.65891	-6.02928	2.28e-09	4.07e-08	10.9081		TOP1	0.312559	6.97045	9.5819	6.61e-21	1.18e-19	36.6208		C4orf33	0.403101	5.4653	7.79828	1.51e-14	2.68e-13	22.3403
CD59	-0.268098	7.46083	-6.02913	2.28e-09	4.07e-08	10.9072		SLC5A6	0.463614	7.24802	9.58111	6.65e-21	1.19e-19	36.6139		CRELD1	-0.317938	6.12433	-7.79805	1.51e-14	2.68e-13	22.3386
SF3B3	0.228857	7.34437	6.02858	2.29e-09	4.08e-08	10.904		EIF1AD	0.317091	5.78628	9.57956	6.75e-21	1.2e-19	36.6003		GINS1	0.510735	6.09093	7.79559	1.54e-14	2.73e-13	22.3206
PATZ1	0.148766	5.01595	6.02776	2.3e-09	4.09e-08	10.8993		PTPRB	-0.385066	5.69827	-9.57871	6.8e-21	1.21e-19	36.5929		UFM1	0.296389	7.36531	7.79361	1.56e-14	2.77e-13	22.3062
GNA11	-0.264808	7.96459	-6.02506	2.34e-09	4.15e-08	10.8838		CHRDL2	-1.09236	5.75183	-9.5785	6.81e-21	1.21e-19	36.5911		CLOCK	-0.329867	6.09671	-7.78956	1.61e-14	2.85e-13	22.2765
PAIP1	0.167083	6.58294	6.02416	2.35e-09	4.17e-08	10.8786		CTDSP1	-0.341896	7.31989	-9.57739	6.88e-21	1.22e-19	36.5813		DNAJA2	0.262313	8.49827	7.78895	1.61e-14	2.86e-13	22.2721
FAM98B	0.117361	5.62519	6.02336	2.36e-09	4.19e-08	10.874		CD248	-0.662119	7.24159	-9.56865	7.43e-21	1.32e-19	36.5048		ACTR10	0.270799	8.2752	7.78341	1.68e-14	2.97e-13	22.2316
NAV1	-0.249766	5.67331	-6.02212	2.38e-09	4.21e-08	10.8669		LRFN5	-0.586179	4.49245	-9.56812	7.47e-21	1.32e-19	36.5001		CCNE2	0.502222	5.76307	7.78337	1.68e-14	2.97e-13	22.2313
ANGPTL2	-0.479333	7.16834	-6.02208	2.38e-09	4.21e-08	10.8667		PRMT5	0.314314	7.28993	9.56596	7.61e-21	1.35e-19	36.4812		TLR3	0.462057	5.2742	7.78259	1.69e-14	2.99e-13	22.2256
PFAS	0.227738	6.73949	6.0203	2.4e-09	4.25e-08	10.8564		FBN1	-0.643266	6.34926	-9.56378	7.76e-21	1.37e-19	36.4622		PSMD7	0.340968	8.38591	7.78218	1.7e-14	2.99e-13	22.2226
TIMP3	-0.502936	7.28721	-6.01977	2.41e-09	4.25e-08	10.8534		LRPPRC	0.319674	7.7515	9.56323	7.8e-21	1.38e-19	36.4573		PPOX	-0.271614	5.71366	-7.78112	1.71e-14	3.01e-13	22.2149
SLC27A2	0.51357	6.41252	6.01975	2.41e-09	4.25e-08	10.8533		VIM	-0.565433	9.03382	-9.56014	8.02e-21	1.41e-19	36.4303		HSD11B1L	-0.284695	5.11491	-7.78087	1.71e-14	3.01e-13	22.2131
PDP2	0.166025	5.17322	6.01921	2.42e-09	4.26e-08	10.8502		BEX4	-0.783789	6.34223	-9.55689	8.25e-21	1.45e-19	36.4019		ERGIC2	0.336791	6.96524	7.78074	1.72e-14	3.01e-13	22.2122
SCO1	0.260854	7.59603	6.01903	2.42e-09	4.26e-08	10.8492		TCF19	0.365489	5.46882	9.55503	8.39e-21	1.47e-19	36.3856		CHERP	-0.234619	6.35971	-7.77612	1.78e-14	3.11e-13	22.1784
EIF6	0.264972	8.54175	6.01888	2.42e-09	4.26e-08	10.8483		MEOX1	-0.604811	5.43637	-9.55361	8.5e-21	1.49e-19	36.3732		MAP3K3	-0.252356	5.41304	-7.77481	1.79e-14	3.14e-13	22.1688
C1QTNF7	-0.449672	4.74487	-6.01488	2.48e-09	4.36e-08	10.8254		RBPMS2	-1.16246	6.69975	-9.55291	8.55e-21	1.5e-19	36.3671		BOK	-0.388453	6.69624	-7.77366	1.81e-14	3.16e-13	22.1604
YTHDF2	0.167465	8.22712	6.01126	2.54e-09	4.45e-08	10.8047		FIBIN	-0.544153	5.47137	-9.54956	8.81e-21	1.54e-19	36.3378		CCDC57	-0.212656	4.62332	-7.77361	1.81e-14	3.16e-13	22.1601
CCL20	0.926365	7.88536	6.00919	2.57e-09	4.5e-08	10.7928		TMEM119	-0.832833	6.53338	-9.54001	9.59e-21	1.68e-19	36.2544		PAPOLA	0.24278	8.35	7.77056	1.85e-14	3.23e-13	22.1379
LAMB2	-0.344217	7.02581	-6.00743	2.59e-09	4.54e-08	10.7827		POP1	0.41545	5.60624	9.5385	9.72e-21	1.7e-19	36.2412		EXT1	-0.34657	7.12707	-7.77034	1.85e-14	3.23e-13	22.1362
POLR3K	0.227348	6.33568	6.00649	2.61e-09	4.56e-08	10.7773		PMAIP1	0.717265	6.30127	9.53564	9.97e-21	1.74e-19	36.2163		CABIN1	-0.340258	6.53631	-7.7698	1.86e-14	3.24e-13	22.1323
FAM110A	0.276766	5.9977	6.0035	2.66e-09	4.64e-08	10.7602		SFRP1	-1.11585	5.52029	-9.5353	1e-20	1.74e-19	36.2133		MAN1B1	-0.273506	7.52612	-7.76797	1.89e-14	3.28e-13	22.119
ADD1	-0.178658	7.95321	-6.00137	2.69e-09	4.69e-08	10.748		PBXIP1	-0.365179	6.10283	-9.53512	1e-20	1.74e-19	36.2117		BLCAP	-0.319462	8.00113	-7.76568	1.92e-14	3.34e-13	22.1023
YME1L1	0.225865	7.13205	6.00097	2.7e-09	4.69e-08	10.7457		PSMA4	0.274405	9.21638	9.53076	1.04e-20	1.81e-19	36.1737		PAPD4	0.337826	6.78505	7.76401	1.94e-14	3.37e-13	22.0901
STOX2	-0.383764	5.51435	-6.00061	2.7e-09	4.7e-08	10.7436		SPAST	0.310087	6.24542	9.53074	1.04e-20	1.81e-19	36.1735		ACSL4	0.33761	6.04029	7.76394	1.95e-14	3.37e-13	22.0896
ANKRD35	-0.392652	5.52164	-5.99787	2.75e-09	4.77e-08	10.7279		CUL4A	0.294745	7.39908	9.52921	1.06e-20	1.83e-19	36.1601		SRBD1	0.227075	6.84352	7.76233	1.97e-14	3.41e-13	22.0778
CNPY4	-0.165888	5.61474	-5.99571	2.78e-09	4.83e-08	10.7156		RAN	0.335296	8.35495	9.5254	1.09e-20	1.89e-19	36.1269		FLJ37453	-0.278159	4.86497	-7.76103	1.99e-14	3.44e-13	22.0684
OCLN	0.313202	5.71821	5.9929	2.83e-09	4.9e-08	10.6996		DPYSL3	-0.932928	7.63966	-9.52368	1.11e-20	1.92e-19	36.1119		EXOC6	0.232652	5.87375	7.74907	2.17e-14	3.75e-13	21.9813
HMGB3	0.347397	6.78171	5.99115	2.86e-09	4.95e-08	10.6896		PRKDC	0.391706	6.73509	9.52353	1.11e-20	1.92e-19	36.1106		FLJ36848	0.43156	4.47495	7.74588	2.23e-14	3.84e-13	21.9582
AASDHPPT	0.186873	6.7662	5.98893	2.9e-09	5.01e-08	10.6769		STAB1	-0.464838	6.1553	-9.51935	1.15e-20	1.99e-19	36.0742		CLEC4E	0.324179	4.65924	7.74514	2.24e-14	3.86e-13	21.9527
RABAC1	-0.247912	8.64596	-5.97673	3.11e-09	5.37e-08	10.6073		MSH6	0.334741	7.40455	9.5193	1.15e-20	1.99e-19	36.0737		ZNF688	-0.203209	5.17898	-7.74421	2.25e-14	3.88e-13	21.946
DUSP12	0.198711	7.53356	5.97513	3.14e-09	5.42e-08	10.5982		AZIN1	0.306527	8.43455	9.5166	1.18e-20	2.03e-19	36.0502		PLK4	0.46015	6.00579	7.74393	2.26e-14	3.88e-13	21.944
E2F7	0.315662	5.48227	5.97498	3.15e-09	5.42e-08	10.5973		GNG7	-0.439828	5.27704	-9.5106	1.24e-20	2.14e-19	35.9979		MEF2D	-0.354217	6.32793	-7.74377	2.26e-14	3.88e-13	21.9428
XPO4	0.190547	6.78732	5.97322	3.18e-09	5.47e-08	10.5873		SCUBE2	-0.76779	4.83131	-9.50944	1.26e-20	2.16e-19	35.9878		IDI1	0.388474	6.98311	7.74277	2.28e-14	3.91e-13	21.9355
CBX6	-0.418927	7.12804	-5.97234	3.2e-09	5.49e-08	10.5823		SCN4B	-0.765671	4.72126	-9.50871	1.27e-20	2.17e-19	35.9814		AFAP1	-0.395778	5.41692	-7.74173	2.3e-14	3.93e-13	21.928
FAM114A1	-0.227939	6.55934	-5.97205	3.2e-09	5.49e-08	10.5806		E2F2	0.56441	6.21644	9.50816	1.27e-20	2.18e-19	35.9766		ZNF624	0.294497	4.70258	7.7411	2.31e-14	3.95e-13	21.9234
CCNC	0.24376	7.00976	5.97006	3.24e-09	5.55e-08	10.5693		GFM1	0.26598	7.4088	9.50689	1.29e-20	2.2e-19	35.9656		FCGR2B	0.532013	5.54474	7.73463	2.42e-14	4.14e-13	21.8764
TIMM50	0.167083	5.41796	5.96922	3.26e-09	5.57e-08	10.5645		HSPB2	-0.719034	5.23064	-9.5065	1.29e-20	2.21e-19	35.9622		LMBR1	0.338952	6.47161	7.73108	2.49e-14	4.24e-13	21.8506
CHST7	-0.32091	6.02525	-5.96762	3.29e-09	5.62e-08	10.5554		PEAR1	-0.401065	5.2089	-9.5048	1.31e-20	2.24e-19	35.9474		ALDH1L2	0.375147	4.61781	7.73027	2.5e-14	4.26e-13	21.8448
DNMT1	0.216521	8.40047	5.96475	3.34e-09	5.71e-08	10.539		HSPA4	0.326275	7.38565	9.50382	1.32e-20	2.26e-19	35.9388		CRAMP1L	-0.271743	5.61877	-7.72758	2.55e-14	4.35e-13	21.8252
PEX10	0.172583	5.31356	5.96217	3.39e-09	5.79e-08	10.5244		NUDT5	0.426645	7.92564	9.50133	1.35e-20	2.3e-19	35.9172		BRD1	-0.236376	6.30496	-7.72692	2.56e-14	4.36e-13	21.8204
GNAI1	-0.339739	5.79586	-5.96132	3.41e-09	5.81e-08	10.5196		PGM5	-1.10623	5.93008	-9.50103	1.35e-20	2.31e-19	35.9146		RBM6	-0.410119	6.86493	-7.72194	2.66e-14	4.52e-13	21.7843
TARS	0.238859	7.66788	5.9591	3.46e-09	5.88e-08	10.5069		VRK2	0.430307	6.70485	9.49745	1.4e-20	2.38e-19	35.8834		DDX56	-0.273684	7.09103	-7.71742	2.75e-14	4.67e-13	21.7515
ANK2	-0.371275	4.76188	-5.95846	3.47e-09	5.9e-08	10.5033		LIX1L	-0.462583	6.09134	-9.49256	1.46e-20	2.48e-19	35.8409		HKR1	-0.288811	5.13382	-7.71714	2.76e-14	4.67e-13	21.7495
NCBP2	0.197293	7.26469	5.95791	3.48e-09	5.91e-08	10.5001		WDR75	0.334589	7.84381	9.488	1.52e-20	2.58e-19	35.8012		SLC27A1	-0.433734	6.48189	-7.71224	2.86e-14	4.84e-13	21.714
CYSLTR2	0.253191	4.35543	5.9578	3.48e-09	5.91e-08	10.4995		EIF4A3	0.282325	8.89771	9.48769	1.52e-20	2.58e-19	35.7986		SPCS2	0.268893	8.38662	7.71076	2.89e-14	4.89e-13	21.7032
ARHGEF10	-0.336603	6.18947	-5.95572	3.53e-09	5.97e-08	10.4877		MRPL15	0.440325	8.68465	9.48676	1.54e-20	2.6e-19	35.7905		ABHD4	-0.239339	5.95075	-7.70985	2.91e-14	4.92e-13	21.6967
PPAP2A	-0.318	7.41696	-5.95281	3.59e-09	6.07e-08	10.4712		TASP1	0.320003	5.77429	9.48584	1.55e-20	2.62e-19	35.7825		GTF2A2	0.337366	7.51177	7.70794	2.95e-14	4.98e-13	21.6829
FLVCR1	0.283087	6.67013	5.95095	3.63e-09	6.13e-08	10.4606		PIGU	0.433186	7.31092	9.48311	1.59e-20	2.68e-19	35.7587		HIGD1A	0.324026	8.8888	7.70733	2.96e-14	5e-13	21.6784
C2orf40	-1.02237	6.23862	-5.94846	3.68e-09	6.21e-08	10.4465		MCM5	0.433421	6.91191	9.48027	1.63e-20	2.75e-19	35.7341		CHPT1	0.423604	7.14795	7.70601	2.99e-14	5.04e-13	21.6689
PGAM5	0.244108	5.46939	5.94831	3.68e-09	6.21e-08	10.4456		ARHGEF6	-0.578975	7.21654	-9.47951	1.64e-20	2.76e-19	35.7275		MAF1	-0.282874	7.08167	-7.704	3.04e-14	5.11e-13	21.6543
MTHFD1	0.213582	7.21083	5.94805	3.69e-09	6.21e-08	10.4441		THY1	-0.702578	7.88823	-9.47133	1.76e-20	2.97e-19	35.6565		TASP1	0.285452	5.77429	7.70301	3.06e-14	5.14e-13	21.6471
ZDHHC22	0.251181	4.4793	5.94803	3.69e-09	6.21e-08	10.4441		PAPLN	-0.586716	5.70018	-9.46889	1.8e-20	3.03e-19	35.6353		TSSC4	-0.301316	6.82039	-7.70093	3.11e-14	5.22e-13	21.6322
GEM	-0.438164	7.24846	-5.94702	3.71e-09	6.24e-08	10.4383		SLC25A15	0.491094	6.19209	9.46807	1.81e-20	3.05e-19	35.6282		WDFY1	0.285824	8.42159	7.69934	3.15e-14	5.27e-13	21.6206
TMEM38B	0.296068	6.42732	5.94387	3.78e-09	6.35e-08	10.4205		ZNF25	-0.474871	6.31305	-9.46591	1.85e-20	3.1e-19	35.6095		SND1	-0.292926	8.09301	-7.6983	3.17e-14	5.31e-13	21.6131
LYPLA1	0.27675	7.43951	5.94374	3.79e-09	6.35e-08	10.4197		IDH3B	0.306107	8.03942	9.46565	1.85e-20	3.1e-19	35.6072		MBNL1	0.334084	7.22711	7.69278	3.3e-14	5.52e-13	21.5732
FAM124B	-0.351996	4.93332	-5.93975	3.88e-09	6.49e-08	10.3971		DDX18	0.246292	8.35367	9.46479	1.87e-20	3.12e-19	35.5998		ITFG3	-0.389582	7.43132	-7.68837	3.41e-14	5.7e-13	21.5414
NAP1L5	-0.356755	5.92044	-5.93891	3.9e-09	6.52e-08	10.3923		ZFPM2	-0.718131	5.09651	-9.46461	1.87e-20	3.13e-19	35.5982		ZNF680	0.390867	6.13886	7.68616	3.47e-14	5.79e-13	21.5254
PDK4	-0.567655	6.33061	-5.93623	3.96e-09	6.61e-08	10.3772		PGK1	0.35472	8.38648	9.46207	1.91e-20	3.19e-19	35.5762		NNT	0.38509	6.37022	7.67706	3.71e-14	6.18e-13	21.4597
MID2	-0.238351	5.43667	-5.93209	4.05e-09	6.77e-08	10.3537		FTSJ2	0.26098	6.37497	9.45999	1.95e-20	3.25e-19	35.5581		LEPREL2	-0.550382	5.46031	-7.67659	3.72e-14	6.2e-13	21.4563
TPM1	-0.392301	8.29266	-5.92942	4.12e-09	6.87e-08	10.3386		CLEC1A	-0.461489	5.26391	-9.4593	1.96e-20	3.26e-19	35.5521		M6PR	0.355231	7.65981	7.67422	3.79e-14	6.3e-13	21.4392
PSKH2	0.206312	4.31717	5.92853	4.14e-09	6.9e-08	10.3336		ABI3BP	-0.923744	6.04268	-9.45917	1.96e-20	3.26e-19	35.551		NFXL1	0.308286	6.74949	7.67368	3.8e-14	6.32e-13	21.4353
HOXA5	-0.467676	7.17863	-5.92659	4.19e-09	6.97e-08	10.3226		ASF1B	0.569777	6.47982	9.45793	1.98e-20	3.3e-19	35.5402		ZKSCAN1	-0.386121	6.21248	-7.67174	3.86e-14	6.4e-13	21.4214
KIFC1	0.480176	6.56934	5.92413	4.25e-09	7.06e-08	10.3087		C1orf123	-0.321135	7.75291	-9.45672	2e-20	3.33e-19	35.5298		EIF3M	0.302954	7.95417	7.67099	3.88e-14	6.43e-13	21.4159
FRZB	-0.557205	6.6238	-5.92343	4.27e-09	7.08e-08	10.3047		SOBP	-0.419239	4.69068	-9.45523	2.03e-20	3.37e-19	35.5169		ZNF205	-0.300664	5.40027	-7.67069	3.89e-14	6.44e-13	21.4137
ATP11A	0.177837	4.96738	5.91733	4.42e-09	7.34e-08	10.2703		CX3CR1	-0.571683	4.78361	-9.45053	2.11e-20	3.51e-19	35.4761		CCDC126	0.33686	5.9393	7.66883	3.94e-14	6.52e-13	21.4004
PPIH	0.213	7.80024	5.91422	4.5e-09	7.46e-08	10.2527		CPXM2	-0.845027	6.22249	-9.44651	2.19e-20	3.63e-19	35.4413		APPL1	0.303223	6.62557	7.66674	4e-14	6.62e-13	21.3853
GUCY1B3	-0.368069	6.11068	-5.91341	4.53e-09	7.49e-08	10.2481		CHD9	-0.334646	7.2533	-9.44381	2.24e-20	3.71e-19	35.4179		NARS2	0.371798	7.10737	7.66657	4.01e-14	6.62e-13	21.3841
MALT1	0.214234	6.05047	5.91246	4.55e-09	7.52e-08	10.2428		PEX13	0.325814	5.90872	9.44297	2.26e-20	3.74e-19	35.4106		ATG16L2	-0.366682	5.41693	-7.65919	4.23e-14	6.98e-13	21.3309
CD248	-0.403746	7.24159	-5.91175	4.57e-09	7.55e-08	10.2388		SPG20	-0.442375	5.35806	-9.43914	2.34e-20	3.86e-19	35.3775		H1FX	-0.360437	7.58516	-7.65625	4.32e-14	7.12e-13	21.3098
POLR1A	0.16628	5.15302	5.90935	4.64e-09	7.65e-08	10.2252		ARHGEF17	-0.527714	5.81667	-9.43803	2.36e-20	3.89e-19	35.3679		TBC1D14	-0.269526	7.5044	-7.65621	4.33e-14	7.12e-13	21.3095
ACAT2	0.309294	7.07522	5.90897	4.65e-09	7.65e-08	10.2231		SLCO4A1	0.716394	6.0752	9.43683	2.39e-20	3.93e-19	35.3575		RAF1	-0.243523	7.09889	-7.65602	4.33e-14	7.12e-13	21.3081
SHANK3	-0.329166	6.05484	-5.90872	4.65e-09	7.66e-08	10.2217		HCFC1R1	-0.41932	7.24321	-9.42786	2.58e-20	4.25e-19	35.2799		PRPS2	0.376099	7.49996	7.65523	4.36e-14	7.15e-13	21.3024
NBL1	-0.350398	8.57985	-5.90579	4.73e-09	7.78e-08	10.2051		PECAM1	-0.53496	7.22759	-9.42725	2.6e-20	4.27e-19	35.2746		C6orf120	0.290783	6.53143	7.65458	4.38e-14	7.18e-13	21.2977
CCDC80	-0.495318	5.71907	-5.90571	4.74e-09	7.78e-08	10.2047		MYO1C	-0.352503	6.97757	-9.42549	2.64e-20	4.33e-19	35.2595		C4orf27	0.298225	6.33489	7.65428	4.39e-14	7.19e-13	21.2956
FOXP2	-0.328944	4.44272	-5.90355	4.8e-09	7.87e-08	10.1926		ANKRD32	0.316846	5.35027	9.41955	2.78e-20	4.56e-19	35.2081		XPO6	-0.24637	7.42347	-7.64934	4.55e-14	7.45e-13	21.2601
PPP2R1B	0.161364	5.66224	5.90065	4.88e-09	7.99e-08	10.1762		FASN	0.513672	7.30048	9.41519	2.89e-20	4.73e-19	35.1704		MORC2	-0.282106	6.60544	-7.64412	4.73e-14	7.73e-13	21.2225
POLD1	0.253094	6.25372	5.90039	4.89e-09	8e-08	10.1747		PINK1	-0.346741	6.82182	-9.41447	2.9e-20	4.75e-19	35.1642		POMT2	-0.270353	5.80484	-7.63761	4.96e-14	8.1e-13	21.1757
WFDC13	0.255671	3.584	5.89848	4.94e-09	8.08e-08	10.164		EIF3J	0.322186	7.25125	9.41397	2.92e-20	4.77e-19	35.1599		C14orf1	0.343211	5.67283	7.63681	4.99e-14	8.14e-13	21.17
MRPL3	0.181967	9.2091	5.89782	4.96e-09	8.1e-08	10.1603		C21orf59	0.281814	6.50707	9.41034	3.01e-20	4.91e-19	35.1286		RNF6	0.18898	5.4549	7.63336	5.12e-14	8.34e-13	21.1452
PDGFRB	-0.381906	7.6894	-5.89482	5.05e-09	8.24e-08	10.1434		PPAPDC3	-0.648269	4.94504	-9.41033	3.01e-20	4.91e-19	35.1285		TMEM201	-0.286817	5.26128	-7.63238	5.15e-14	8.39e-13	21.1383
PLCXD3	-0.445799	4.22307	-5.89435	5.06e-09	8.25e-08	10.1407		MRPL9	0.310753	7.39827	9.40881	3.05e-20	4.97e-19	35.1153		TAF1C	-0.287994	6.34022	-7.628	5.32e-14	8.66e-13	21.1068
FAM120B	-0.176	7.23309	-5.89388	5.08e-09	8.26e-08	10.1381		HPDL	0.789363	5.66294	9.40856	3.06e-20	4.97e-19	35.1132		ENTHD1	0.372802	3.89532	7.6274	5.35e-14	8.69e-13	21.1025
SARS2	0.259153	6.41486	5.89337	5.09e-09	8.28e-08	10.1352		LBR	0.410655	7.53537	9.40855	3.06e-20	4.97e-19	35.1131		TUBGCP2	-0.258866	6.90627	-7.62697	5.36e-14	8.7e-13	21.0994
SMNDC1	0.222065	8.05757	5.89248	5.12e-09	8.31e-08	10.1302		NBEA	-0.750498	5.46751	-9.40846	3.06e-20	4.97e-19	35.1124		ERLIN1	0.312345	6.49325	7.62628	5.39e-14	8.74e-13	21.0945
IGFBP5	-0.383773	8.24186	-5.89177	5.14e-09	8.34e-08	10.1262		FAM127A	-0.563466	7.98639	-9.40707	3.1e-20	5.03e-19	35.1004		QTRTD1	0.250246	5.25767	7.62556	5.42e-14	8.78e-13	21.0893
PGR	-0.2695	4.23623	-5.89002	5.19e-09	8.42e-08	10.1164		WDR74	0.380102	6.57263	9.40551	3.14e-20	5.09e-19	35.0869		LOC284023	-0.357383	5.91996	-7.62517	5.44e-14	8.79e-13	21.0865
FAM110B	-0.309863	5.00617	-5.88977	5.2e-09	8.42e-08	10.115		CBFB	0.345613	7.1041	9.39636	3.4e-20	5.51e-19	35.0079		ACTR1A	-0.229115	7.60836	-7.62132	5.59e-14	9.03e-13	21.0589
GARNL3	-0.231257	4.60602	-5.88962	5.2e-09	8.42e-08	10.1142		TUSC3	-0.557178	5.23997	-9.39584	3.42e-20	5.53e-19	35.0035		SF1	-0.231654	5.6542	-7.61943	5.67e-14	9.15e-13	21.0454
PSMB8	0.291026	8.17566	5.88874	5.23e-09	8.45e-08	10.1092		LIN54	0.303457	5.27784	9.39277	3.51e-20	5.67e-19	34.977		MAPK3	-0.353625	7.97195	-7.61913	5.68e-14	9.16e-13	21.0432
NBN	0.205392	6.91069	5.88679	5.29e-09	8.54e-08	10.0982		DIXDC1	-0.57346	5.78214	-9.3925	3.52e-20	5.68e-19	34.9747		MAP4	-0.289898	5.86763	-7.61211	5.98e-14	9.63e-13	20.993
SCARA5	-0.490814	5.03936	-5.8852	5.34e-09	8.61e-08	10.0893		ANKRD39	0.32326	6.23814	9.38752	3.68e-20	5.93e-19	34.9318		TMEM19	0.288827	5.6656	7.60541	6.28e-14	1.01e-12	20.945
WWC3	-0.317006	6.73743	-5.88431	5.37e-09	8.65e-08	10.0843		CHRDL1	-0.925929	5.20104	-9.38706	3.69e-20	5.95e-19	34.9278		SQRDL	0.384325	8.05545	7.60473	6.31e-14	1.01e-12	20.9401
BID	0.233414	6.67687	5.87753	5.59e-09	8.99e-08	10.0462		NPR2	-0.332548	5.26833	-9.3831	3.82e-20	6.15e-19	34.8937		LRRFIP1	-0.541506	7.91364	-7.60327	6.38e-14	1.02e-12	20.9297
NSUN2	0.218326	8.16667	5.8765	5.62e-09	9.03e-08	10.0405		NPM3	0.463094	7.21927	9.38249	3.84e-20	6.18e-19	34.8885		SPATA5L1	0.28625	6.64783	7.60051	6.51e-14	1.04e-12	20.91
THUMPD2	0.185791	6.4967	5.87389	5.71e-09	9.16e-08	10.0258		DLL1	-0.5147	5.97831	-9.38131	3.88e-20	6.23e-19	34.8783		NUP160	0.278164	6.76767	7.59952	6.56e-14	1.05e-12	20.9029
CDO1	-0.359321	4.86023	-5.87224	5.76e-09	9.24e-08	10.0165		PRELP	-0.632418	5.44249	-9.37996	3.93e-20	6.3e-19	34.8667		ETNK1	0.448121	6.60368	7.59945	6.56e-14	1.05e-12	20.9024
NCL	0.158176	8.35428	5.87084	5.81e-09	9.3e-08	10.0087		MYB	0.803159	6.89786	9.37957	3.94e-20	6.32e-19	34.8633		PPP1R10	-0.300545	7.01036	-7.59813	6.63e-14	1.06e-12	20.8929
DHX15	0.142873	9.13628	5.86907	5.87e-09	9.39e-08	9.99877		DZIP1	-0.48352	4.86076	-9.37915	3.96e-20	6.33e-19	34.8597		CSTF1	0.250193	5.66518	7.59204	6.93e-14	1.11e-12	20.8494
ARHGEF6	-0.353733	7.21654	-5.86806	5.9e-09	9.44e-08	9.99312		PM20D2	0.479526	6.42125	9.37883	3.97e-20	6.34e-19	34.857		HSPD1	0.251808	8.60314	7.592	6.93e-14	1.11e-12	20.8491
AK2	0.169165	7.60149	5.86714	5.94e-09	9.48e-08	9.98795		RPS7	0.430937	9.15345	9.37414	4.13e-20	6.6e-19	34.8166		NDUFAB1	0.287565	9.85636	7.59033	7.02e-14	1.12e-12	20.8372
COL8A1	-0.535911	6.42147	-5.86525	6e-09	9.57e-08	9.97738		PIGW	0.382449	5.87363	9.37137	4.24e-20	6.76e-19	34.7928		DHX9	0.2569	6.15709	7.58987	7.04e-14	1.12e-12	20.8339
GNG3	0.22718	4.6861	5.86369	6.06e-09	9.65e-08	9.96864		MTCH2	0.310269	6.81088	9.37096	4.25e-20	6.77e-19	34.7892		SNX3	0.237981	9.19231	7.58273	7.42e-14	1.18e-12	20.7829
KCNT2	-0.303714	4.45899	-5.86231	6.11e-09	9.72e-08	9.96092		ADCY9	-0.369593	5.81741	-9.36955	4.3e-20	6.85e-19	34.7771		C1QBP	0.370047	9.00565	7.58219	7.45e-14	1.18e-12	20.7791
PRPF6	0.215499	6.23088	5.8617	6.13e-09	9.74e-08	9.95751		MYL9	-1.01235	7.03901	-9.36455	4.5e-20	7.15e-19	34.7342		FLI1	0.346543	5.0068	7.58126	7.5e-14	1.19e-12	20.7725
ZNF232	0.228986	6.49632	5.85826	6.25e-09	9.92e-08	9.93823		SORD	0.573361	6.47586	9.35906	4.72e-20	7.49e-19	34.6869		CDKN3	0.551193	7.132	7.57762	7.7e-14	1.22e-12	20.7465
MRPL16	0.213352	7.35262	5.8582	6.25e-09	9.92e-08	9.93794		PSMF1	0.283043	7.69688	9.35823	4.75e-20	7.54e-19	34.6798		ATP11B	0.343592	6.464	7.57737	7.71e-14	1.22e-12	20.7447
HEYL	-0.389151	6.66846	-5.85775	6.27e-09	9.94e-08	9.93542		INMT	-0.836134	5.92311	-9.34656	5.26e-20	8.33e-19	34.5796		MC1R	-0.389787	5.53218	-7.57618	7.78e-14	1.23e-12	20.7362
ANXA5	-0.235134	9.45478	-5.8559	6.34e-09	1e-07	9.92504		PPP1R14A	-1.03389	6.65326	-9.34648	5.26e-20	8.33e-19	34.5789		TYMS	0.543872	7.46199	7.57606	7.79e-14	1.23e-12	20.7354
DDX55	0.194374	6.79074	5.85482	6.38e-09	1.01e-07	9.919		TGFBR2	-0.489215	7.82526	-9.34191	5.48e-20	8.66e-19	34.5397		TRIM23	0.312757	4.90846	7.57468	7.87e-14	1.24e-12	20.7256
PPP3CB	-0.225507	7.95754	-5.85401	6.41e-09	1.01e-07	9.91447		STIP1	0.408555	7.92024	9.34102	5.52e-20	8.72e-19	34.5321		TMEM161B	0.303548	5.35489	7.57307	7.96e-14	1.25e-12	20.7141
LEPREL2	-0.376993	5.46031	-5.8523	6.47e-09	1.02e-07	9.90493		CDC23	0.260948	7.10761	9.34053	5.55e-20	8.75e-19	34.5278		ACTN1	-0.474429	8.91236	-7.5711	8.08e-14	1.27e-12	20.7
BAZ1A	0.186344	7.49415	5.85206	6.48e-09	1.02e-07	9.9036		SRXN1	0.462274	7.5265	9.32002	6.63e-20	1.05e-18	34.3521		USO1	0.228322	8.27165	7.57109	8.08e-14	1.27e-12	20.7
GLG1	-0.169212	8.55921	-5.85205	6.48e-09	1.02e-07	9.90352		FGF2	-0.573362	4.93349	-9.31977	6.65e-20	1.05e-18	34.3499		PRDM1	0.391217	6.40021	7.56043	8.73e-14	1.37e-12	20.6241
NOTCH3	-0.316568	6.6562	-5.85085	6.53e-09	1.03e-07	9.89682		PDZD8	0.457344	7.10428	9.31483	6.94e-20	1.09e-18	34.3077		SNX5	0.28182	7.20768	7.56011	8.75e-14	1.37e-12	20.6218
CHTF18	0.282144	5.99568	5.85082	6.53e-09	1.03e-07	9.89668		TWIST2	-0.457416	4.66185	-9.31423	6.97e-20	1.1e-18	34.3025		ZFAND3	-0.265566	6.63365	-7.55877	8.84e-14	1.39e-12	20.6123
LMOD1	-0.673466	5.87011	-5.84934	6.58e-09	1.03e-07	9.88837		FANCE	0.364606	6.24706	9.31349	7.02e-20	1.1e-18	34.2962		USP11	-0.376864	6.86647	-7.55826	8.87e-14	1.39e-12	20.6087
EMP3	-0.357448	7.58972	-5.8477	6.65e-09	1.04e-07	9.87922		GLRB	-0.564103	4.62289	-9.31321	7.04e-20	1.1e-18	34.2938		NCBP2	0.278526	7.26469	7.55719	8.94e-14	1.4e-12	20.601
HK1	-0.238992	7.95556	-5.84747	6.66e-09	1.04e-07	9.87794		CHCHD3	0.332925	6.57354	9.31258	7.07e-20	1.11e-18	34.2884		SIX5	-0.391186	6.20998	-7.55702	8.95e-14	1.4e-12	20.5998
PRELP	-0.389115	5.44249	-5.84747	6.66e-09	1.04e-07	9.87793		PCDHB4	-0.447264	4.73752	-9.3079	7.37e-20	1.15e-18	34.2484		TSC2	-0.279343	5.40572	-7.55693	8.96e-14	1.4e-12	20.5992
CYP2U1	-0.211566	5.11247	-5.84421	6.78e-09	1.06e-07	9.85975		HIC1	-0.407127	4.95188	-9.30442	7.59e-20	1.19e-18	34.2186		AKAP13	-0.28138	6.86794	-7.55272	9.23e-14	1.44e-12	20.5692
APTX	0.156223	6.55104	5.84402	6.79e-09	1.06e-07	9.85871		GGT5	-0.737833	5.32555	-9.2999	7.9e-20	1.23e-18	34.1799		TYK2	-0.303485	7.70071	-7.55183	9.29e-14	1.45e-12	20.5629
FANCG	0.247058	6.99086	5.84297	6.83e-09	1.07e-07	9.8528		ACTR3B	0.310375	5.14501	9.29635	8.15e-20	1.27e-18	34.1496		VPS29	0.235403	8.44896	7.54946	9.46e-14	1.47e-12	20.5461
EED	0.195991	6.23885	5.84117	6.9e-09	1.08e-07	9.8428		TWF1	0.332391	6.02401	9.29495	8.25e-20	1.29e-18	34.1377		GLG1	-0.242873	8.55921	-7.54685	9.64e-14	1.5e-12	20.5275
PWP2	0.148247	5.2951	5.84026	6.94e-09	1.08e-07	9.8377		ICT1	0.322438	7.35311	9.29482	8.26e-20	1.29e-18	34.1366		MCOLN1	-0.34932	6.53012	-7.53806	1.03e-13	1.6e-12	20.4651
SLC25A23	-0.280357	7.36562	-5.83985	6.96e-09	1.08e-07	9.8354		KLHDC1	-0.296495	4.3739	-9.29232	8.44e-20	1.31e-18	34.1152		ACIN1	-0.242234	6.93716	-7.53727	1.03e-13	1.6e-12	20.4595
CLEC14A	-0.363877	6.66448	-5.83929	6.98e-09	1.08e-07	9.83228		CD3EAP	0.323895	5.71299	9.29197	8.46e-20	1.31e-18	34.1122		STXBP3	0.28715	6.83209	7.5359	1.04e-13	1.62e-12	20.4498
GNAQ	-0.260851	6.65951	-5.83881	7e-09	1.09e-07	9.82962		NAT10	0.369189	7.79184	9.29181	8.47e-20	1.32e-18	34.1109		RPS6KA2	-0.33924	6.17767	-7.5331	1.07e-13	1.65e-12	20.4299
ZFPM2	-0.437146	5.09651	-5.83739	7.06e-09	1.09e-07	9.8217		FERMT1	0.721506	7.26351	9.29152	8.5e-20	1.32e-18	34.1084		TBC1D22B	-0.253425	5.51894	-7.52872	1.1e-13	1.7e-12	20.3988
GDI2	0.209213	9.36477	5.83644	7.1e-09	1.1e-07	9.81638		SUGT1	0.332224	7.14528	9.29084	8.55e-20	1.32e-18	34.1026		LTB4R	-0.367237	5.08189	-7.52623	1.12e-13	1.73e-12	20.3812
CTSF	-0.363737	6.43742	-5.83552	7.14e-09	1.1e-07	9.81127		XRCC6BP1	0.315466	5.94034	9.28743	8.8e-20	1.36e-18	34.0735		IBTK	0.368462	7.24616	7.52294	1.15e-13	1.77e-12	20.3579
ECE2	0.200127	5.5239	5.83526	7.15e-09	1.1e-07	9.80984		HEATR3	0.308405	5.8852	9.28584	8.92e-20	1.38e-18	34.0599		SLC38A6	0.359505	6.66128	7.52088	1.16e-13	1.8e-12	20.3433
MED30	0.239871	7.13925	5.83312	7.24e-09	1.12e-07	9.79792		HSPA12B	-0.418651	5.4527	-9.28556	8.95e-20	1.38e-18	34.0575		PCGF5	0.28741	5.94641	7.52065	1.17e-13	1.8e-12	20.3417
PMM1	-0.276503	6.94004	-5.83275	7.25e-09	1.12e-07	9.79582		KIF18B	0.398594	5.47118	9.28092	9.31e-20	1.44e-18	34.0179		DBI	0.295092	9.55176	7.51978	1.17e-13	1.81e-12	20.3355
PLVAP	-0.332964	7.05616	-5.82997	7.37e-09	1.14e-07	9.78036		ADHFE1	-0.457163	5.36383	-9.28015	9.38e-20	1.44e-18	34.0113		SEPHS1	0.257841	7.27103	7.51817	1.19e-13	1.83e-12	20.3241
TPSAB1	-0.592131	6.52047	-5.82956	7.39e-09	1.14e-07	9.77809		NUP54	0.252201	6.60547	9.27514	9.79e-20	1.51e-18	33.9686		RGS12	-0.198003	4.8542	-7.51591	1.21e-13	1.85e-12	20.3082
RAPGEF1	-0.179068	6.33469	-5.82757	7.47e-09	1.15e-07	9.76698		SALL2	-0.580387	5.45474	-9.27393	9.9e-20	1.52e-18	33.9583		CAPN7	0.233462	6.34772	7.51551	1.21e-13	1.86e-12	20.3053
SEC23B	0.263932	7.998	5.82616	7.53e-09	1.16e-07	9.75915		SNX33	-0.271501	6.23605	-9.2682	1.04e-19	1.6e-18	33.9094		HS2ST1	0.302955	6.08069	7.51407	1.22e-13	1.87e-12	20.2951
RARRES2	-0.456438	7.98883	-5.82602	7.54e-09	1.16e-07	9.75839		PRPF40A	0.251177	7.24847	9.26281	1.09e-19	1.67e-18	33.8635		IL4R	-0.324152	7.23695	-7.5137	1.23e-13	1.88e-12	20.2925
SYNGR1	-0.200969	5.11983	-5.82564	7.56e-09	1.16e-07	9.75624		DPY30	0.295756	8.39038	9.2627	1.09e-19	1.67e-18	33.8626		ATXN2	-0.296307	7.64047	-7.51205	1.24e-13	1.9e-12	20.2808
TMEM174	0.12676	4.64233	5.8228	7.68e-09	1.18e-07	9.74043		NUP93	0.304438	6.71576	9.26189	1.1e-19	1.68e-18	33.8557		TUBG2	-0.372791	5.54999	-7.51105	1.25e-13	1.91e-12	20.2738
KLHL3	-0.3268	5.41914	-5.82163	7.73e-09	1.18e-07	9.73392		PRR7	0.495686	5.30719	9.25766	1.14e-19	1.74e-18	33.8197		RPL9	0.182717	10.7293	7.50743	1.28e-13	1.96e-12	20.2482
RELT	0.225901	4.98825	5.81966	7.82e-09	1.2e-07	9.72298		GUCY1A3	-0.866159	7.23235	-9.2554	1.16e-19	1.78e-18	33.8004		P4HA1	0.400558	6.2723	7.50435	1.31e-13	2e-12	20.2264
MAGEA11	0.496668	3.86947	5.81944	7.83e-09	1.2e-07	9.72175		TRAP1	0.344058	6.77123	9.25114	1.21e-19	1.84e-18	33.7642		NOTCH4	-0.325083	5.71365	-7.50349	1.32e-13	2.01e-12	20.2203
ZNF367	0.264912	5.5852	5.81877	7.86e-09	1.2e-07	9.71803		COL5A1	-0.734862	8.02422	-9.24768	1.24e-19	1.89e-18	33.7348		ZWILCH	0.344288	6.91249	7.50288	1.33e-13	2.02e-12	20.216
NUAK1	-0.319082	7.16589	-5.81751	7.92e-09	1.21e-07	9.71104		POLR1A	0.26358	5.15302	9.24525	1.27e-19	1.93e-18	33.7141		LCAT	-0.384061	4.4292	-7.49454	1.41e-13	2.14e-12	20.157
SEH1L	0.223982	6.86166	5.81325	8.12e-09	1.24e-07	9.68737		MRPL19	0.430426	6.16154	9.24496	1.27e-19	1.94e-18	33.7116		PAQR3	0.305268	5.91706	7.49261	1.43e-13	2.17e-12	20.1434
CRYGB	0.251221	4.40758	5.81106	8.22e-09	1.25e-07	9.67519		TPM2	-0.836074	7.99491	-9.24075	1.32e-19	2.01e-18	33.6758		NCOR2	-0.279507	7.05482	-7.49073	1.45e-13	2.2e-12	20.1302
SLC5A10	0.225283	4.16183	5.81003	8.27e-09	1.26e-07	9.66949		TGDS	0.328145	6.64285	9.2389	1.34e-19	2.04e-18	33.6601		GTF2B	0.251413	7.57133	7.48956	1.46e-13	2.21e-12	20.1219
MRPS17	0.229013	8.08153	5.80821	8.36e-09	1.27e-07	9.65936		MAP3K3	-0.272606	5.41304	-9.22588	1.5e-19	2.28e-18	33.5495		NDUFAF1	0.266762	6.69361	7.48936	1.46e-13	2.21e-12	20.1205
ESPL1	0.285452	6.16959	5.80672	8.43e-09	1.28e-07	9.65109		ARMCX1	-0.6722	6.3696	-9.22056	1.57e-19	2.38e-18	33.5044		MTHFR	-0.26343	5.66421	-7.4885	1.47e-13	2.23e-12	20.1144
CASP6	0.240569	6.91474	5.80671	8.43e-09	1.28e-07	9.65105		MRPS30	0.386391	7.5478	9.21736	1.61e-19	2.44e-18	33.4772		CHEK1	0.453474	6.2059	7.48121	1.55e-13	2.34e-12	20.063
PPP1R14A	-0.633346	6.65326	-5.8011	8.71e-09	1.32e-07	9.61992		SCRG1	-1.31288	5.73774	-9.21701	1.62e-19	2.45e-18	33.4743		PGAM1	0.403271	8.63296	7.48081	1.56e-13	2.35e-12	20.0602
EFS	-0.283214	5.06083	-5.80038	8.75e-09	1.32e-07	9.61598		DENR	0.258379	7.75803	9.21604	1.63e-19	2.47e-18	33.4661		PHF1	-0.246949	6.36016	-7.47981	1.57e-13	2.36e-12	20.0532
OLFML2A	-0.34447	6.55684	-5.79941	8.8e-09	1.33e-07	9.61057		BID	0.370793	6.67687	9.21522	1.64e-19	2.48e-18	33.4591		RRP15	0.313473	6.85449	7.47839	1.58e-13	2.39e-12	20.0432
MFGE8	-0.360657	7.95326	-5.79928	8.8e-09	1.33e-07	9.60987		SF3B3	0.354357	7.34437	9.21295	1.68e-19	2.53e-18	33.4398		ZCCHC14	-0.287077	6.53395	-7.4696	1.69e-13	2.54e-12	19.9812
C5orf34	0.268412	5.57393	5.79811	8.86e-09	1.34e-07	9.60338		NOVA1	-0.399559	4.22228	-9.20941	1.73e-19	2.6e-18	33.4098		C9orf142	-0.316934	7.23599	-7.46862	1.7e-13	2.56e-12	19.9743
FOXM1	0.411694	6.29827	5.79705	8.92e-09	1.34e-07	9.5975		MRPL12	0.36663	7.34725	9.20227	1.84e-19	2.77e-18	33.3493		CD80	0.290405	4.74295	7.46744	1.71e-13	2.57e-12	19.9661
RNF185	-0.173866	6.28097	-5.79376	9.09e-09	1.37e-07	9.5793		NSMCE2	0.346048	7.17168	9.20219	1.84e-19	2.77e-18	33.3486		PRCP	0.29469	7.3954	7.46384	1.76e-13	2.64e-12	19.9407
TMEM100	-0.589922	5.664	-5.79343	9.1e-09	1.37e-07	9.57748		C5orf34	0.431577	5.57393	9.20132	1.85e-19	2.78e-18	33.3412		LDHB	0.636978	9.05486	7.4626	1.77e-13	2.66e-12	19.932
H2AFX	0.268221	6.069	5.79326	9.11e-09	1.37e-07	9.57651		ZUFSP	0.276074	6.52982	9.19945	1.88e-19	2.83e-18	33.3255		SSFA2	0.382074	6.65331	7.46197	1.78e-13	2.67e-12	19.9276
VSNL1	0.579573	5.70435	5.79311	9.12e-09	1.37e-07	9.57571		BRIP1	0.383746	4.81929	9.19854	1.9e-19	2.85e-18	33.3177		CHST12	-0.316528	6.33734	-7.46186	1.78e-13	2.67e-12	19.9268
LIMS2	-0.425305	5.9253	-5.79306	9.12e-09	1.37e-07	9.57542		IL1R1	-0.48607	6.20473	-9.19333	1.99e-19	2.97e-18	33.2737		ILF2	0.302197	9.04555	7.45885	1.82e-13	2.73e-12	19.9056
NR2C1	0.167056	5.87424	5.78921	9.33e-09	1.4e-07	9.55413		LTC4S	-0.509517	4.84549	-9.19288	1.99e-19	2.98e-18	33.2698		SCAMP2	-0.249426	6.44661	-7.45609	1.86e-13	2.78e-12	19.8862
MRS2	0.208162	6.00647	5.78783	9.4e-09	1.41e-07	9.54648		MPHOSPH6	0.362852	6.23336	9.19156	2.02e-19	3.01e-18	33.2587		DGCR2	-0.292151	6.83284	-7.45557	1.87e-13	2.78e-12	19.8826
RTKN2	0.246063	4.11006	5.78733	9.43e-09	1.41e-07	9.54373		PES1	0.298289	5.70884	9.19024	2.04e-19	3.04e-18	33.2474		LIPE	-0.325093	4.77684	-7.45099	1.93e-13	2.88e-12	19.8504
TMEM51	-0.208433	8.11505	-5.78667	9.47e-09	1.41e-07	9.54003		RNGTT	0.280725	6.6412	9.18599	2.11e-19	3.15e-18	33.2115		ADD1	-0.246701	7.95321	-7.44581	2e-13	2.98e-12	19.814
SRXN1	0.283181	7.5265	5.78462	9.58e-09	1.43e-07	9.52869		ZBTB9	0.297961	6.40156	9.18569	2.12e-19	3.16e-18	33.209		HCFC1R1	-0.363617	7.24321	-7.44244	2.05e-13	3.05e-12	19.7904
SLC25A4	-0.374079	7.0012	-5.783	9.67e-09	1.44e-07	9.51978		HDC	-0.749118	5.58568	-9.18482	2.14e-19	3.18e-18	33.2016		ZFPM1	-0.413003	6.61397	-7.43896	2.1e-13	3.13e-12	19.766
INTS8	0.304099	7.7493	5.7825	9.7e-09	1.44e-07	9.51699		FAM114A1	-0.355176	6.55934	-9.18448	2.14e-19	3.18e-18	33.1988		IFNG	0.711365	4.90351	7.43384	2.18e-13	3.24e-12	19.7301
FHL1	-0.673939	7.09304	-5.78007	9.83e-09	1.46e-07	9.50356		RAMP3	-0.505536	6.20361	-9.18443	2.14e-19	3.18e-18	33.1983		CNTROB	-0.242554	5.08119	-7.43158	2.22e-13	3.29e-12	19.7142
TEAD4	0.253826	6.23813	5.77988	9.84e-09	1.46e-07	9.50251		ALG8	0.382531	7.52788	9.18369	2.16e-19	3.2e-18	33.1921		STRAP	0.305162	7.98896	7.43099	2.23e-13	3.3e-12	19.7101
BCAS3	-0.156871	5.12768	-5.77576	1.01e-08	1.49e-07	9.47978		STK3	0.34079	7.27876	9.17819	2.26e-19	3.35e-18	33.1456		ATHL1	-0.593466	6.22514	-7.42835	2.27e-13	3.36e-12	19.6916
MKKS	0.188059	7.56655	5.7754	1.01e-08	1.5e-07	9.47778		SPC24	0.505584	5.98208	9.17819	2.26e-19	3.35e-18	33.1455		SAR1B	0.284055	7.23105	7.42651	2.3e-13	3.4e-12	19.6787
DOK6	-0.249018	4.16887	-5.77455	1.02e-08	1.5e-07	9.47312		BOLA3	0.332285	8.59841	9.17622	2.3e-19	3.4e-18	33.1289		PPP1R8	0.189372	6.83161	7.42573	2.31e-13	3.42e-12	19.6733
DLAT	0.19921	7.13668	5.7744	1.02e-08	1.5e-07	9.47225		AGMAT	0.673562	6.36505	9.17594	2.31e-19	3.41e-18	33.1266		C5orf22	0.285395	5.74104	7.42141	2.39e-13	3.52e-12	19.643
PTCH1	-0.304283	5.36292	-5.77034	1.04e-08	1.54e-07	9.44987		DTNA	-0.448874	4.7831	-9.16988	2.43e-19	3.59e-18	33.0754		STRN4	-0.267865	5.86848	-7.42088	2.4e-13	3.53e-12	19.6393
HS2ST1	0.208935	6.08069	5.76761	1.06e-08	1.56e-07	9.43482		PARVA	-0.464693	6.37872	-9.1662	2.51e-19	3.7e-18	33.0443		NIP7	0.320602	7.47885	7.41955	2.42e-13	3.56e-12	19.63
SGSH	-0.239224	7.0112	-5.76753	1.06e-08	1.56e-07	9.43439		ZBTB16	-0.688874	4.98895	-9.16557	2.52e-19	3.72e-18	33.039		CIAPIN1	0.254829	6.51378	7.41864	2.43e-13	3.58e-12	19.6236
PYCRL	0.386017	5.07882	5.767	1.06e-08	1.56e-07	9.43143		PSMB3	0.290587	9.92184	9.16416	2.55e-19	3.76e-18	33.0271		NIPSNAP3A	0.31607	6.50476	7.41801	2.45e-13	3.59e-12	19.6193
NEGR1	-0.379606	4.64503	-5.76363	1.08e-08	1.59e-07	9.41286		FAM110B	-0.488485	5.00617	-9.16404	2.55e-19	3.76e-18	33.0261		TRMT1	-0.281642	6.11932	-7.41609	2.48e-13	3.64e-12	19.6058
DYNC1LI2	-0.199091	8.63238	-5.76138	1.1e-08	1.61e-07	9.40048		CAV1	-0.807469	8.14852	-9.16196	2.6e-19	3.82e-18	33.0086		NOL11	0.259684	8.12298	7.41578	2.48e-13	3.64e-12	19.6037
C8orf76	0.217803	7.56079	5.76111	1.1e-08	1.61e-07	9.399		FBXO22	0.268719	5.79459	9.16188	2.6e-19	3.82e-18	33.0079		POLRMT	-0.261338	6.45818	-7.41515	2.5e-13	3.66e-12	19.5992
SLC29A2	0.286021	5.58685	5.75797	1.12e-08	1.64e-07	9.38168		ZNF343	0.282488	5.14065	9.1599	2.65e-19	3.88e-18	32.9912		NUP214	-0.220607	6.71297	-7.41307	2.53e-13	3.71e-12	19.5847
MYB	0.486577	6.89786	5.7574	1.12e-08	1.64e-07	9.37854		FAM129A	-0.83655	7.4351	-9.15883	2.67e-19	3.91e-18	32.9821		CDKN1B	0.336728	8.2742	7.412	2.55e-13	3.73e-12	19.5772
MST4	0.283881	7.18599	5.75666	1.13e-08	1.65e-07	9.37452		RASIP1	-0.470965	5.93351	-9.15759	2.7e-19	3.95e-18	32.9716		ARRDC3	0.341632	6.53984	7.41102	2.57e-13	3.76e-12	19.5704
PCOLCE	-0.504687	7.02911	-5.75455	1.14e-08	1.67e-07	9.36289		LIMCH1	-0.566788	6.04195	-9.15358	2.79e-19	4.09e-18	32.9378		CLIC2	0.469729	5.90628	7.41035	2.58e-13	3.77e-12	19.5657
SLC25A34	-0.268634	4.84037	-5.75444	1.14e-08	1.67e-07	9.3623		HSPH1	0.431825	8.42207	9.15231	2.82e-19	4.13e-18	32.9271		COPS3	0.222694	8.17257	7.4103	2.58e-13	3.77e-12	19.5653
LRCH2	-0.357037	5.14046	-5.74953	1.17e-08	1.71e-07	9.33529		MS4A2	-0.529588	4.57698	-9.14797	2.93e-19	4.28e-18	32.8905		KCNK13	0.392946	4.10758	7.40948	2.6e-13	3.79e-12	19.5596
C12orf57	-0.278151	8.87863	-5.74941	1.17e-08	1.71e-07	9.33461		PARP1	0.287611	8.56678	9.14761	2.94e-19	4.29e-18	32.8875		MRPL45	0.297659	7.37307	7.40785	2.63e-13	3.83e-12	19.5482
DLL1	-0.311326	5.97831	-5.74934	1.17e-08	1.71e-07	9.33421		TFB1M	0.310601	6.46937	9.14474	3.01e-19	4.39e-18	32.8633		ZNF146	0.300769	7.489	7.40576	2.67e-13	3.88e-12	19.5336
CLP1	0.129799	6.37883	5.74901	1.18e-08	1.71e-07	9.3324		MAP1B	-0.684219	6.15581	-9.14321	3.05e-19	4.44e-18	32.8504		CXCL10	0.957482	7.95354	7.40012	2.78e-13	4.04e-12	19.4943
EHD2	-0.337335	6.09896	-5.74831	1.18e-08	1.72e-07	9.32856		C20orf194	-0.387782	5.63703	-9.13978	3.14e-19	4.57e-18	32.8216		KMO	0.351995	4.60874	7.3943	2.9e-13	4.21e-12	19.4537
PCDHGA9	0.228327	4.33124	5.74733	1.19e-08	1.72e-07	9.32321		EDNRA	-0.670359	6.57456	-9.13717	3.22e-19	4.67e-18	32.7996		TLR8	0.478675	5.0471	7.39352	2.91e-13	4.23e-12	19.4482
PTGIS	-0.487015	5.62212	-5.74559	1.2e-08	1.74e-07	9.3136		ZNF540	-0.405383	4.45102	-9.13341	3.32e-19	4.82e-18	32.7679		MRPL32	0.230402	8.71196	7.39301	2.92e-13	4.24e-12	19.4446
TUSC3	-0.336177	5.23997	-5.74384	1.21e-08	1.76e-07	9.30399		CYR61	-0.787898	8.07619	-9.12861	3.46e-19	5.02e-18	32.7275		TNKS2	0.274255	5.40038	7.3879	3.03e-13	4.39e-12	19.409
CTDSPL2	0.159525	5.93625	5.74347	1.21e-08	1.76e-07	9.30201		CDC5L	0.32582	6.7623	9.1265	3.52e-19	5.1e-18	32.7098		METAP2	0.26285	8.21548	7.38659	3.06e-13	4.43e-12	19.3999
SCMH1	-0.213462	6.23302	-5.74312	1.22e-08	1.76e-07	9.30008		RAD18	0.2447	4.6812	9.12371	3.61e-19	5.22e-18	32.6863		HMGN1	0.29612	9.67601	7.38645	3.07e-13	4.43e-12	19.3989
ACTL6A	0.22037	8.34498	5.74256	1.22e-08	1.76e-07	9.29698		RAD51	0.439736	5.70017	9.12135	3.68e-19	5.32e-18	32.6665		NUS1	0.261216	6.37209	7.38465	3.1e-13	4.48e-12	19.3864
PPAPDC3	-0.390268	4.94504	-5.73992	1.24e-08	1.79e-07	9.28247		RNF180	-0.435457	4.26142	-9.11752	3.8e-19	5.49e-18	32.6343		FAM26F	0.537479	5.74055	7.38385	3.12e-13	4.5e-12	19.3808
RHOJ	-0.332963	5.57265	-5.73899	1.25e-08	1.8e-07	9.27739		PHLDB2	-0.565547	5.4236	-9.11701	3.82e-19	5.51e-18	32.63		FKRP	-0.296812	5.29457	-7.3825	3.15e-13	4.54e-12	19.3714
COLEC12	-0.494473	5.97103	-5.73842	1.25e-08	1.8e-07	9.27426		COL6A1	-0.644859	7.07475	-9.11123	4.01e-19	5.79e-18	32.5814		EIF1B	0.327513	7.41157	7.37917	3.23e-13	4.65e-12	19.3482
FDPS	0.228071	7.6141	5.73754	1.26e-08	1.81e-07	9.26941		MAF	-0.458381	5.64862	-9.1083	4.12e-19	5.93e-18	32.5569		ATP6V0A1	-0.264822	7.26959	-7.37779	3.26e-13	4.69e-12	19.3386
NPHP3	-0.222748	5.74529	-5.73458	1.28e-08	1.84e-07	9.25321		SART3	0.220901	6.06508	9.09701	4.53e-19	6.52e-18	32.4621		RNASEH2B	0.378162	6.05504	7.37304	3.37e-13	4.84e-12	19.3055
MRPS30	0.237202	7.5478	5.73312	1.29e-08	1.85e-07	9.24519		NOC2L	0.318345	5.5953	9.09249	4.71e-19	6.77e-18	32.4242		WASF2	-0.30997	7.17579	-7.37289	3.38e-13	4.84e-12	19.3045
RNASEH2B	0.264152	6.05504	5.73208	1.3e-08	1.86e-07	9.23948		SCN1B	-0.294588	5.07138	-9.08362	5.08e-19	7.3e-18	32.3498		PPM1F	-0.359017	6.75906	-7.37079	3.43e-13	4.91e-12	19.2898
CNN1	-0.886259	7.3314	-5.7313	1.3e-08	1.87e-07	9.23523		SH3PXD2A	-0.455025	7.35964	-9.08216	5.14e-19	7.38e-18	32.3377		CCBL2	0.281461	6.97687	7.37062	3.43e-13	4.91e-12	19.2887
FBXO22	0.165833	5.79459	5.72862	1.32e-08	1.89e-07	9.22054		CDC25B	0.51342	7.9721	9.07872	5.3e-19	7.59e-18	32.3088		MGST1	0.597429	7.00553	7.36704	3.52e-13	5.04e-12	19.2638
FANCD2	0.236138	5.38696	5.72756	1.33e-08	1.9e-07	9.2147		CD36	-0.624144	5.44644	-9.07705	5.37e-19	7.69e-18	32.2949		TMEM182	0.272237	4.61983	7.36506	3.57e-13	5.1e-12	19.25
CYYR1	-0.355784	6.37002	-5.72653	1.34e-08	1.91e-07	9.20908		MAPRE2	-0.353447	7.25101	-9.07401	5.51e-19	7.89e-18	32.2694		KLF3	0.220612	5.97361	7.36492	3.57e-13	5.1e-12	19.2491
CCDC58	0.355795	6.94878	5.72569	1.34e-08	1.92e-07	9.20448		HSPB8	-0.893921	6.11521	-9.07206	5.61e-19	8.01e-18	32.253		RAP2A	0.295338	7.12665	7.36473	3.58e-13	5.11e-12	19.2477
ITGB3BP	0.237531	6.92583	5.72143	1.38e-08	1.97e-07	9.18115		SOD3	-0.685033	6.01207	-9.06933	5.74e-19	8.19e-18	32.2302		SLC25A34	-0.382594	4.84037	-7.36363	3.61e-13	5.14e-12	19.2401
HHIP	-0.356422	4.39208	-5.71936	1.39e-08	1.99e-07	9.16986		XKRX	0.514376	4.17342	9.06817	5.8e-19	8.27e-18	32.2205		PHLDB1	-0.405084	5.56502	-7.35564	3.82e-13	5.44e-12	19.1846
PSMD11	0.175752	6.68244	5.7191	1.39e-08	1.99e-07	9.16841		FKBP4	0.445517	6.61561	9.06596	5.91e-19	8.42e-18	32.2021		WDHD1	0.324101	4.95487	7.35361	3.87e-13	5.51e-12	19.1705
BUD13	0.13853	6.3844	5.71702	1.41e-08	2.01e-07	9.15703		CD93	-0.567793	7.97658	-9.06458	5.98e-19	8.51e-18	32.1905		IMMT	0.317544	8.22836	7.35298	3.89e-13	5.53e-12	19.1661
FOXJ2	-0.166146	6.97102	-5.71475	1.43e-08	2.03e-07	9.14466		SSPN	-0.680935	6.43495	-9.0572	6.36e-19	9.05e-18	32.1288		ISCA1	0.280841	6.99018	7.3496	3.99e-13	5.66e-12	19.1427
DUSP26	-0.226686	5.40183	-5.71403	1.44e-08	2.04e-07	9.14069		PRPF19	0.299808	7.72967	9.05712	6.37e-19	9.05e-18	32.1282		BTF3	0.21702	9.48962	7.34785	4.04e-13	5.72e-12	19.1305
CD2AP	0.321303	6.94621	5.71227	1.45e-08	2.06e-07	9.13109		NCL	0.247233	8.35428	9.05673	6.39e-19	9.07e-18	32.1249		TNFAIP8L1	-0.373667	6.62859	-7.34775	4.04e-13	5.72e-12	19.1299
FBXO32	-0.425575	6.36048	-5.71074	1.46e-08	2.08e-07	9.1227		E2F8	0.571579	5.59794	9.054	6.54e-19	9.27e-18	32.102		ZNF358	-0.328774	6.63823	-7.34494	4.12e-13	5.83e-12	19.1104
C7	-0.76933	5.91862	-5.71016	1.47e-08	2.08e-07	9.11956		YPEL3	-0.403722	6.76717	-9.05251	6.62e-19	9.38e-18	32.0896		USP7	-0.250178	7.01798	-7.34244	4.19e-13	5.93e-12	19.093
SLC24A3	-0.374551	6.10264	-5.70968	1.47e-08	2.08e-07	9.11695		TIMP3	-0.766155	7.28721	-9.05089	6.71e-19	9.5e-18	32.0761		TNFSF13B	0.568415	7.24186	7.34011	4.26e-13	6.03e-12	19.0769
CHML	0.178645	4.9759	5.70861	1.48e-08	2.09e-07	9.1111		RASGRP2	-0.420591	5.03534	-9.04977	6.78e-19	9.58e-18	32.0668		RING1	-0.219505	8.17661	-7.3366	4.37e-13	6.17e-12	19.0525
APOL6	0.229829	5.613	5.705	1.51e-08	2.14e-07	9.09139		CDO1	-0.56106	4.86023	-9.04976	6.78e-19	9.58e-18	32.0666		MAPRE3	-0.335582	5.02075	-7.33642	4.38e-13	6.17e-12	19.0513
ZNF273	0.141684	4.95939	5.70426	1.52e-08	2.14e-07	9.08737		PLN	-1.06521	5.64923	-9.04777	6.89e-19	9.73e-18	32.05		SGPP1	0.331415	5.78878	7.33485	4.43e-13	6.24e-12	19.0404
CALD1	-0.436148	7.84106	-5.70171	1.54e-08	2.17e-07	9.07343		MYOT	-0.785163	4.37521	-9.043	7.18e-19	1.01e-17	32.0103		ZNF335	-0.272865	4.97436	-7.33459	4.44e-13	6.24e-12	19.0387
SMC3	0.183383	7.02937	5.69949	1.56e-08	2.2e-07	9.06136		NTN4	-0.563026	6.46621	-9.04062	7.32e-19	1.03e-17	31.9904		MTFR1	0.350682	7.08477	7.3334	4.47e-13	6.29e-12	19.0304
FOXN3	-0.143326	5.4818	-5.69548	1.6e-08	2.25e-07	9.03947		ARMCX4	-0.301798	4.50057	-9.03067	7.97e-19	1.12e-17	31.9074		ATP6AP1	-0.277877	9.16236	-7.32845	4.63e-13	6.51e-12	18.9962
EEF2	-0.150435	10.6475	-5.69232	1.62e-08	2.28e-07	9.02229		U2AF2	0.241635	7.15499	9.03003	8.01e-19	1.13e-17	31.9021		RSRC2	0.268992	7.58838	7.32641	4.7e-13	6.6e-12	18.982
NXN	-0.392209	7.30804	-5.69208	1.63e-08	2.28e-07	9.02095		LAMC1	-0.457601	8.82826	-9.02737	8.2e-19	1.15e-17	31.8799		PIK3C2A	0.265694	5.93059	7.32627	4.71e-13	6.6e-12	18.9811
STK3	0.208595	7.27876	5.69202	1.63e-08	2.28e-07	9.02065		PLP1	-0.758196	4.46038	-9.02688	8.23e-19	1.16e-17	31.8759		TSEN54	-0.308445	6.48781	-7.32494	4.75e-13	6.65e-12	18.9719
PALLD	-0.393282	8.54488	-5.6911	1.64e-08	2.29e-07	9.0156		ST6GALNAC3	-0.431824	4.79135	-9.02371	8.45e-19	1.19e-17	31.8494		FURIN	-0.362564	6.19098	-7.32329	4.81e-13	6.73e-12	18.9605
TEK	-0.321061	5.98408	-5.69088	1.64e-08	2.29e-07	9.01444		NR2C1	0.263751	5.87424	9.02108	8.64e-19	1.21e-17	31.8275		CCNDBP1	0.317991	7.90594	7.3217	4.86e-13	6.8e-12	18.9495
HOXB2	-0.398872	6.64099	-5.69077	1.64e-08	2.29e-07	9.01385		CENPJ	0.400634	5.70671	9.01637	9e-19	1.26e-17	31.7883		TP53I13	-0.38523	6.88611	-7.3195	4.94e-13	6.9e-12	18.9342
VKORC1	-0.199793	8.40426	-5.6904	1.64e-08	2.3e-07	9.01181		MCCC2	0.380796	5.88844	9.01551	9.06e-19	1.27e-17	31.7811		TJAP1	-0.38245	7.5308	-7.319	4.95e-13	6.92e-12	18.9308
REEP5	-0.185229	8.90937	-5.68802	1.66e-08	2.33e-07	8.99885		MRPS23	0.322298	6.92058	9.01325	9.24e-19	1.29e-17	31.7623		CHKB	-0.299917	7.03242	-7.31828	4.98e-13	6.94e-12	18.9258
WFDC8	0.146298	4.25435	5.68601	1.68e-08	2.35e-07	8.9879		SSSCA1	0.343185	6.05409	9.01137	9.39e-19	1.31e-17	31.7466		CD38	0.6911	5.8414	7.31268	5.18e-13	7.22e-12	18.8872
CLEC1A	-0.273779	5.26391	-5.6858	1.69e-08	2.35e-07	8.98677		NGFRAP1	-0.695943	8.21887	-9.01086	9.43e-19	1.31e-17	31.7425		ZNF330	0.228608	6.97787	7.31103	5.24e-13	7.3e-12	18.8758
MDC1	0.227028	6.59405	5.68565	1.69e-08	2.35e-07	8.98598		SCMH1	-0.339306	6.23302	-9.01004	9.49e-19	1.32e-17	31.7356		SMU1	0.241051	5.99931	7.3091	5.31e-13	7.39e-12	18.8625
DLEU2	0.243004	4.91293	5.68542	1.69e-08	2.35e-07	8.9847		TRMT5	0.306073	8.55623	9.00829	9.63e-19	1.34e-17	31.721		KLHL17	-0.289295	4.97373	-7.30345	5.53e-13	7.69e-12	18.8234
RRAGC	-0.147029	7.08847	-5.68315	1.71e-08	2.38e-07	8.97238		CTSK	-0.731599	8.33872	-9.00658	9.77e-19	1.36e-17	31.7068		OSBPL11	0.264802	6.30888	7.303	5.55e-13	7.7e-12	18.8204
CPXM2	-0.501721	6.22249	-5.68272	1.72e-08	2.38e-07	8.97006		ALG6	0.292918	7.30246	9.00505	9.9e-19	1.38e-17	31.6941		RAD23A	-0.258514	7.94487	-7.29803	5.75e-13	7.97e-12	18.7861
SEPW1	-0.215839	9.08228	-5.68074	1.74e-08	2.41e-07	8.95929		ADRM1	0.369559	8.08058	9.00299	1.01e-18	1.4e-17	31.677		RABAC1	-0.336883	8.64596	-7.2972	5.78e-13	8.01e-12	18.7804
RECK	-0.266849	5.64636	-5.68023	1.74e-08	2.41e-07	8.9565		WASF2	-0.344495	7.17579	-9.00112	1.02e-18	1.42e-17	31.6614		USP35	-0.252883	5.20595	-7.29387	5.92e-13	8.19e-12	18.7574
ZNF827	-0.300542	6.37899	-5.67942	1.75e-08	2.42e-07	8.9521		RMND5A	0.303994	5.88374	9.00044	1.03e-18	1.43e-17	31.6558		NDC80	0.467992	6.67094	7.29171	6.01e-13	8.31e-12	18.7425
MEIS1	-0.419909	6.5128	-5.67906	1.75e-08	2.43e-07	8.95014		TMEM91	-0.443762	5.50325	-8.99718	1.06e-18	1.46e-17	31.6287		RAD9A	-0.355809	6.20875	-7.29053	6.06e-13	8.37e-12	18.7344
E2F3	0.218462	7.38584	5.67777	1.76e-08	2.44e-07	8.94312		PPA1	0.3479	10.3137	8.99581	1.07e-18	1.48e-17	31.6173		ALG14	0.275451	6.11027	7.28984	6.09e-13	8.41e-12	18.7297
DZIP1	-0.288883	4.86076	-5.6776	1.77e-08	2.44e-07	8.94221		TAF1B	0.289305	5.87173	8.99279	1.1e-18	1.52e-17	31.5923		ZBTB11	0.288559	5.85831	7.28422	6.34e-13	8.74e-12	18.691
HOXA4	-0.396662	5.44527	-5.67665	1.78e-08	2.45e-07	8.93704		SCG5	-0.809678	6.55813	-8.98691	1.15e-18	1.59e-17	31.5434		TMEM14A	0.417305	8.28946	7.28302	6.39e-13	8.81e-12	18.6827
PALM	-0.337228	5.88398	-5.67593	1.78e-08	2.46e-07	8.93313		PSTK	0.284369	5.02924	8.98683	1.15e-18	1.59e-17	31.5427		RAB21	0.280073	6.89427	7.28064	6.5e-13	8.95e-12	18.6663
PINK1	-0.206268	6.82182	-5.67435	1.8e-08	2.48e-07	8.92457		ZNF280C	0.334377	5.21532	8.9812	1.21e-18	1.67e-17	31.496		MAP1A	-0.392773	5.26698	-7.27847	6.6e-13	9.08e-12	18.6514
FOXN2	0.183325	7.36827	5.67348	1.81e-08	2.49e-07	8.91985		C12orf29	0.315482	6.93085	8.98085	1.21e-18	1.67e-17	31.4931		ZNF628	-0.219304	5.01298	-7.27579	6.72e-13	9.24e-12	18.633
MGC24103	-0.467257	5.29058	-5.67199	1.82e-08	2.51e-07	8.91175		PPM1G	0.291589	8.01445	8.97675	1.26e-18	1.73e-17	31.4591		DPY19L2P2	-0.368033	4.32513	-7.27505	6.76e-13	9.28e-12	18.6279
CLEC11A	-0.394062	5.85799	-5.67026	1.84e-08	2.53e-07	8.90235		CHUK	0.284151	7.14289	8.97373	1.29e-18	1.77e-17	31.4341		RAB40C	-0.319616	7.35363	-7.27397	6.81e-13	9.34e-12	18.6205
ARHGAP22	-0.242624	4.65409	-5.66943	1.85e-08	2.54e-07	8.89787		TBC1D2B	-0.317539	6.59104	-8.97249	1.3e-18	1.79e-17	31.4238		TRAF2	-0.405224	5.66831	-7.2729	6.86e-13	9.4e-12	18.6131
EIF3J	0.191491	7.25125	5.66901	1.85e-08	2.54e-07	8.89555		POLR3F	0.383852	6.07401	8.96888	1.34e-18	1.84e-17	31.3939		MAP2K2	-0.29454	7.26424	-7.27264	6.88e-13	9.41e-12	18.6113
POU2F1	0.177088	5.47798	5.66677	1.88e-08	2.57e-07	8.88343		IQCB1	0.260291	6.36186	8.96837	1.35e-18	1.85e-17	31.3897		RAB11FIP3	-0.353577	6.71066	-7.27195	6.91e-13	9.45e-12	18.6066
RAB11FIP5	-0.206671	6.57508	-5.66515	1.9e-08	2.6e-07	8.87465		PTN	-0.530145	6.38839	-8.96369	1.4e-18	1.92e-17	31.3509		CSNK1G3	0.231867	6.37776	7.26845	7.08e-13	9.68e-12	18.5825
FAM111B	0.283598	4.84344	5.66453	1.9e-08	2.6e-07	8.87129		PYCRL	0.607869	5.07882	8.96314	1.41e-18	1.93e-17	31.3463		HPSE	0.4653	5.6928	7.26829	7.09e-13	9.68e-12	18.5814
SMU1	0.167824	5.99931	5.66367	1.91e-08	2.61e-07	8.86663		TMEM88	-0.436493	5.4646	-8.96225	1.42e-18	1.94e-17	31.3389		CCNB1	0.558043	6.83184	7.26737	7.14e-13	9.73e-12	18.5751
FMO2	-0.462312	5.82065	-5.66311	1.92e-08	2.62e-07	8.8636		POLE3	0.293774	8.57931	8.95777	1.48e-18	2.02e-17	31.3018		SMPDL3A	0.471718	6.46435	7.26648	7.18e-13	9.79e-12	18.569
CXCL12	-0.514443	6.36925	-5.66282	1.92e-08	2.62e-07	8.86203		PKP2	0.576524	6.53551	8.9548	1.51e-18	2.06e-17	31.2773		TSPAN6	0.505722	7.34488	7.26528	7.24e-13	9.86e-12	18.5608
ZNF165	0.392147	6.38066	5.66098	1.94e-08	2.64e-07	8.85205		SMOC2	-0.981779	6.92608	-8.95473	1.51e-18	2.06e-17	31.2767		SNX14	0.267626	6.81675	7.26516	7.25e-13	9.86e-12	18.56
DKK3	-0.356636	7.25961	-5.66024	1.95e-08	2.65e-07	8.84802		RBM14	0.25188	7.20564	8.95141	1.56e-18	2.12e-17	31.2492		CSNK1E	-0.289872	6.9228	-7.26418	7.3e-13	9.92e-12	18.5532
BNC2	-0.395935	5.53388	-5.65453	2.01e-08	2.74e-07	8.8171		NUP85	0.282721	7.83273	8.94908	1.59e-18	2.16e-17	31.23		RBM38	-0.374672	6.54416	-7.2636	7.33e-13	9.95e-12	18.5492
WDR43	0.228233	6.72731	5.65205	2.04e-08	2.77e-07	8.80371		TUBB6	-0.609767	7.23752	-8.9472	1.61e-18	2.19e-17	31.2144		HECTD3	-0.301821	7.00234	-7.2609	7.47e-13	1.01e-11	18.5307
EIF4A3	0.165994	8.89771	5.65193	2.04e-08	2.77e-07	8.80306		SSRP1	0.292775	6.93276	8.94646	1.62e-18	2.2e-17	31.2083		TMEM64	0.334884	5.88149	7.26	7.52e-13	1.02e-11	18.5245
SCARB2	-0.162348	8.87642	-5.64963	2.07e-08	2.81e-07	8.79059		BARX1	-0.801434	5.59287	-8.94623	1.63e-18	2.21e-17	31.2064		RWDD3	0.274105	6.30578	7.25565	7.75e-13	1.05e-11	18.4947
INGX	0.248523	3.99397	5.64832	2.08e-08	2.82e-07	8.78354		ANTXR2	-0.596203	7.10415	-8.94064	1.7e-18	2.31e-17	31.1602		PBXIP1	-0.305239	6.10283	-7.25545	7.76e-13	1.05e-11	18.4934
E2F8	0.351933	5.59794	5.64829	2.08e-08	2.82e-07	8.7834		SNRPE	0.299935	6.3243	8.93708	1.76e-18	2.38e-17	31.1307		FOXO3	-0.307233	7.88241	-7.25474	7.8e-13	1.05e-11	18.4885
OMD	-0.575726	5.24127	-5.64736	2.1e-08	2.84e-07	8.77835		YEATS4	0.49043	6.79462	8.93655	1.76e-18	2.39e-17	31.1264		DFNB31	-0.377746	4.84339	-7.25272	7.91e-13	1.07e-11	18.4746
MOXD1	-0.401888	5.79068	-5.64346	2.14e-08	2.9e-07	8.75729		FLNC	-0.963095	7.21585	-8.9358	1.78e-18	2.4e-17	31.1202		CHST3	-0.448652	5.56597	-7.25208	7.95e-13	1.07e-11	18.4702
GAS7	-0.238866	5.46847	-5.64305	2.15e-08	2.9e-07	8.75505		DACT1	-0.635318	6.10397	-8.92688	1.91e-18	2.58e-17	31.0466		FAM63A	-0.39772	6.72462	-7.25166	7.97e-13	1.07e-11	18.4674
PGM5	-0.648351	5.93008	-5.64193	2.16e-08	2.92e-07	8.749		LPPR4	-0.577276	5.03796	-8.91944	2.04e-18	2.75e-17	30.9852		OTUD1	0.294783	6.21706	7.24926	8.11e-13	1.09e-11	18.4509
ZNF362	-0.227978	6.412	-5.63799	2.21e-08	2.98e-07	8.72776		FOXP2	-0.503452	4.44272	-8.91777	2.07e-18	2.79e-17	30.9714		TRIM3	-0.182501	4.75556	-7.24912	8.11e-13	1.09e-11	18.45
EYA3	0.108605	5.01507	5.63729	2.22e-08	2.99e-07	8.72397		FABP4	-0.921157	5.32689	-8.91683	2.08e-18	2.8e-17	30.9636		NOXA1	-0.372067	6.11133	-7.24884	8.13e-13	1.09e-11	18.448
WDR75	0.196183	7.84381	5.63661	2.23e-08	3e-07	8.72029		EXOSC9	0.339246	6.833	8.91492	2.12e-18	2.85e-17	30.9479		PSMB9	0.52131	7.7431	7.24866	8.14e-13	1.09e-11	18.4468
EHMT2	0.146038	5.39801	5.63637	2.23e-08	3e-07	8.71898		CASP2	0.288388	6.67203	8.91466	2.12e-18	2.85e-17	30.9457		SUMO1	0.289738	6.67997	7.24854	8.15e-13	1.09e-11	18.446
DTNA	-0.272116	4.7831	-5.63231	2.28e-08	3.06e-07	8.6971		CTSG	-0.897393	5.48233	-8.91407	2.13e-18	2.86e-17	30.9409		MORC3	0.286102	6.4668	7.24807	8.17e-13	1.1e-11	18.4428
BRAP	0.195732	5.44428	5.63226	2.28e-08	3.06e-07	8.69682		PLVAP	-0.515628	7.05616	-8.91072	2.19e-18	2.94e-17	30.9133		RAD21	0.323046	8.27934	7.24452	8.38e-13	1.12e-11	18.4184
CKMT2	-0.452312	4.87486	-5.62955	2.32e-08	3.11e-07	8.68222		IQGAP3	0.309862	5.09117	8.90447	2.31e-18	3.1e-17	30.8618		CRYGB	0.348528	4.40758	7.2435	8.44e-13	1.13e-11	18.4114
MYOM1	-0.480847	5.40107	-5.62784	2.34e-08	3.13e-07	8.67298		DNMT1	0.327187	8.40047	8.89598	2.48e-18	3.32e-17	30.7919		EIF2B4	-0.186367	7.74592	-7.23848	8.74e-13	1.17e-11	18.3771
FAM96A	0.201991	8.86016	5.62688	2.35e-08	3.15e-07	8.66784		COL4A6	-0.574038	4.51568	-8.895	2.5e-18	3.35e-17	30.7839		PRKCQ	0.39983	6.27709	7.23767	8.79e-13	1.18e-11	18.3715
KIAA0355	-0.239247	7.33443	-5.62579	2.37e-08	3.17e-07	8.66197		SMNDC1	0.339587	8.05757	8.89356	2.53e-18	3.38e-17	30.772		TSPAN15	-0.385264	6.70889	-7.23694	8.84e-13	1.18e-11	18.3666
KIAA0430	-0.198588	7.30703	-5.62466	2.38e-08	3.18e-07	8.6559		COPS3	0.243268	8.17257	8.8922	2.56e-18	3.42e-17	30.7608		ARHGEF10	-0.454798	6.18947	-7.23014	9.27e-13	1.24e-11	18.3201
VLDLR	-0.395908	5.28639	-5.62337	2.4e-08	3.2e-07	8.64894		ESF1	0.245697	5.80208	8.88086	2.81e-18	3.76e-17	30.6676		MAFG	-0.259381	5.79068	-7.2295	9.31e-13	1.24e-11	18.3157
SYNPO2	-0.619519	6.06787	-5.62196	2.42e-08	3.23e-07	8.64134		PABPC5	-0.536416	3.79248	-8.87823	2.88e-18	3.84e-17	30.646		ANP32E	0.281704	6.2474	7.22895	9.35e-13	1.24e-11	18.3119
PDGFD	-0.322831	5.63498	-5.62078	2.43e-08	3.24e-07	8.63498		EID1	-0.403477	6.74875	-8.8772	2.9e-18	3.87e-17	30.6375		IFIT5	0.324594	6.38592	7.22865	9.37e-13	1.25e-11	18.3099
CHCHD3	0.198221	6.57354	5.61778	2.48e-08	3.3e-07	8.61888		COQ3	0.356468	6.97287	8.87213	3.03e-18	4.03e-17	30.5959		RYK	0.252047	7.48823	7.22775	9.43e-13	1.25e-11	18.3037
CDCA4	0.205346	6.60074	5.61655	2.49e-08	3.32e-07	8.61223		GLE1	0.3089	6.76557	8.87114	3.05e-18	4.06e-17	30.5878		SNRPD1	0.335583	7.0523	7.22675	9.49e-13	1.26e-11	18.2969
GEMIN6	0.179775	6.91567	5.61117	2.57e-08	3.41e-07	8.58331		CCL20	1.38537	7.88536	8.86968	3.09e-18	4.11e-17	30.5757		NSUN5	-0.259274	6.87578	-7.22667	9.5e-13	1.26e-11	18.2964
DACT1	-0.394097	6.10397	-5.61055	2.58e-08	3.42e-07	8.57997		C1S	-0.739168	8.03279	-8.86924	3.1e-18	4.12e-17	30.5721		ADH5	0.287603	6.93137	7.226	9.54e-13	1.27e-11	18.2918
SALL2	-0.346434	5.45474	-5.60866	2.61e-08	3.46e-07	8.56984		TOMM70A	0.240715	8.52668	8.86679	3.17e-18	4.2e-17	30.552		COPS5	0.252741	9.03397	7.22514	9.6e-13	1.27e-11	18.2859
WRNIP1	0.186121	6.82418	5.60833	2.61e-08	3.46e-07	8.56808		ACTR6	0.302409	7.00167	8.86666	3.17e-18	4.2e-17	30.551		MAML1	-0.170842	6.40755	-7.22432	9.66e-13	1.28e-11	18.2803
ZNF385D	-0.303521	4.69148	-5.6081	2.61e-08	3.46e-07	8.56682		PCDH17	-0.568418	7.2174	-8.86449	3.23e-18	4.27e-17	30.5332		RRM2	0.591665	7.22488	7.22306	9.74e-13	1.29e-11	18.2717
FTO	-0.203835	6.72261	-5.60761	2.62e-08	3.47e-07	8.5642		GJA4	-0.467263	5.95667	-8.86404	3.24e-18	4.29e-17	30.5295		TBC1D17	-0.30993	5.55951	-7.22151	9.85e-13	1.3e-11	18.2611
DGAT2	0.2769	5.89421	5.6072	2.63e-08	3.47e-07	8.56201		FBXL6	0.40422	5.86927	8.86321	3.26e-18	4.31e-17	30.5227		LRIG3	0.389385	6.4507	7.21884	1e-12	1.32e-11	18.2429
PPP1R8	0.128431	6.83161	5.60509	2.66e-08	3.51e-07	8.5507		DSEL	-0.426386	4.42307	-8.86245	3.28e-18	4.34e-17	30.5164		ADRA2B	0.325705	4.91058	7.21651	1.02e-12	1.34e-11	18.227
GCH1	0.24524	6.72496	5.60489	2.66e-08	3.51e-07	8.54962		LYL1	-0.479947	6.59527	-8.86072	3.33e-18	4.39e-17	30.5023		YARS2	0.278339	7.26492	7.21633	1.02e-12	1.35e-11	18.2257
EPSTI1	0.398804	8.13407	5.60202	2.7e-08	3.57e-07	8.53418		GLG1	-0.259571	8.55921	-8.86009	3.35e-18	4.41e-17	30.4971		PYGO2	-0.270668	5.66123	-7.20847	1.08e-12	1.42e-11	18.1721
SECTM1	0.281385	5.88753	5.60029	2.73e-08	3.6e-07	8.52495		POLD1	0.38499	6.25372	8.8584	3.4e-18	4.47e-17	30.4832		ALS2CL	-0.2444	5.14541	-7.2075	1.09e-12	1.43e-11	18.1655
MAP1A	-0.271438	5.26698	-5.59833	2.76e-08	3.63e-07	8.5144		GAD1	0.828846	4.7005	8.85144	3.6e-18	4.74e-17	30.4262		NKTR	-0.319341	6.50248	-7.20578	1.1e-12	1.44e-11	18.1538
CNTNAP1	-0.373431	5.79893	-5.59617	2.79e-08	3.68e-07	8.50283		RNASEL	-0.302548	6.44829	-8.85013	3.64e-18	4.78e-17	30.4154		AXIN1	-0.385352	6.58361	-7.20326	1.12e-12	1.47e-11	18.1367
METAP1	0.168538	8.16676	5.59491	2.81e-08	3.7e-07	8.4961		RSPO3	-0.912244	6.82853	-8.84886	3.68e-18	4.83e-17	30.405		PIH1D2	0.230025	4.28188	7.20305	1.12e-12	1.47e-11	18.1352
FRMD5	0.336761	4.96471	5.59445	2.82e-08	3.7e-07	8.4936		RFT1	0.240691	5.15668	8.84405	3.83e-18	5.02e-17	30.3657		CCDC101	-0.230926	6.01125	-7.20245	1.13e-12	1.47e-11	18.1311
SFT2D2	0.119671	6.18373	5.59076	2.88e-08	3.78e-07	8.47385		PALM	-0.53238	5.88398	-8.84385	3.83e-18	5.03e-17	30.3641		FANCM	0.238383	4.59842	7.20029	1.14e-12	1.5e-11	18.1164
CLDN5	-0.394575	6.59204	-5.5901	2.89e-08	3.79e-07	8.47033		ATAD3A	0.378974	6.65704	8.84192	3.9e-18	5.1e-17	30.3483		TNFAIP8	0.377203	6.39298	7.1976	1.16e-12	1.52e-11	18.0981
ZNF696	0.213695	5.71359	5.58759	2.93e-08	3.84e-07	8.45687		METTL7A	-0.615174	6.71614	-8.84072	3.93e-18	5.15e-17	30.3384		C11orf1	0.350595	6.4273	7.19648	1.17e-12	1.53e-11	18.0905
NOL10	0.176208	5.76539	5.58667	2.95e-08	3.85e-07	8.45199		ID4	-0.475277	5.34138	-8.84034	3.95e-18	5.16e-17	30.3353		COX19	-0.410358	6.20171	-7.19459	1.19e-12	1.55e-11	18.0776
RAE1	0.232304	7.06666	5.58665	2.95e-08	3.85e-07	8.45183		SLC7A1	0.376246	7.33823	8.83798	4.03e-18	5.26e-17	30.316		TMEM175	-0.363337	6.23995	-7.19384	1.2e-12	1.56e-11	18.0725
NUP133	0.151601	7.04929	5.58504	2.97e-08	3.88e-07	8.44323		MCC	-0.376543	5.34656	-8.83716	4.05e-18	5.29e-17	30.3093		B3GNT2	0.356326	6.2471	7.19086	1.22e-12	1.59e-11	18.0522
PHYHD1	-0.309416	4.92151	-5.58354	3e-08	3.91e-07	8.43524		TRO	-0.430874	4.79623	-8.83692	4.06e-18	5.3e-17	30.3073		TSPYL2	-0.280456	5.82501	-7.18746	1.25e-12	1.63e-11	18.0291
FILIP1	-0.425721	5.2144	-5.58241	3.02e-08	3.93e-07	8.42917		TUBG1	0.356836	7.12091	8.8369	4.06e-18	5.3e-17	30.3071		FBXO46	-0.257794	6.86289	-7.18554	1.27e-12	1.65e-11	18.0161
STK35	0.2119	6.29345	5.58238	3.02e-08	3.93e-07	8.42903		NBN	0.312272	6.91069	8.83355	4.18e-18	5.44e-17	30.2797		KCTD13	-0.362423	5.76224	-7.18384	1.28e-12	1.67e-11	18.0045
SLC35B4	-0.18054	5.76717	-5.58215	3.02e-08	3.93e-07	8.4278		SMTN	-0.803817	6.43716	-8.83107	4.26e-18	5.55e-17	30.2595		METTL6	0.263746	4.80916	7.18307	1.29e-12	1.67e-11	17.9993
MYL9	-0.595517	7.03901	-5.58142	3.03e-08	3.95e-07	8.4239		KIAA0020	0.339005	7.00217	8.83086	4.27e-18	5.55e-17	30.2578		ADCK1	-0.270522	6.0146	-7.18098	1.31e-12	1.7e-11	17.9851
GEMIN7	0.128903	5.33154	5.58078	3.05e-08	3.96e-07	8.42046		DDX1	0.216954	9.20571	8.82946	4.32e-18	5.61e-17	30.2463		WFS1	-0.425805	7.26721	-7.18031	1.31e-12	1.7e-11	17.9805
HPRT1	0.191139	7.61968	5.5787	3.08e-08	4e-07	8.40937		TXNIP	-0.599619	8.97765	-8.82811	4.37e-18	5.67e-17	30.2353		PDCD1LG2	0.391805	3.90628	7.17839	1.33e-12	1.73e-11	17.9675
SGSM2	-0.24405	7.36255	-5.57803	3.09e-08	4.01e-07	8.40578		GUCY1B3	-0.556277	6.11068	-8.82079	4.64e-18	6.02e-17	30.1754		GGA1	-0.285707	7.96706	-7.17715	1.34e-12	1.74e-11	17.9591
XYLT1	-0.297086	5.53555	-5.57735	3.1e-08	4.02e-07	8.40212		UNG	0.373963	7.16014	8.81979	4.68e-18	6.07e-17	30.1673		SNAPC2	-0.287881	5.84474	-7.17702	1.34e-12	1.74e-11	17.9582
MAPRE1	0.179467	8.97111	5.57555	3.14e-08	4.06e-07	8.39251		HTR2B	-0.948733	5.08733	-8.81614	4.83e-18	6.25e-17	30.1375		DLEU1	0.342266	6.25867	7.17633	1.35e-12	1.75e-11	17.9535
PCDHGA1	0.159091	4.30502	5.57469	3.15e-08	4.08e-07	8.38793		ZNF232	0.348945	6.49632	8.81098	5.04e-18	6.52e-17	30.0953		TWISTNB	0.252576	6.01089	7.17255	1.39e-12	1.79e-11	17.9278
ZNF200	0.148265	6.06128	5.57393	3.16e-08	4.09e-07	8.38386		CILP	-0.937025	6.09609	-8.8089	5.13e-18	6.63e-17	30.0783		COL18A1	-0.409508	6.95593	-7.17178	1.39e-12	1.8e-11	17.9226
MAN1C1	-0.360518	6.05933	-5.57245	3.19e-08	4.12e-07	8.37596		CYB5B	0.387263	8.15159	8.80853	5.14e-18	6.64e-17	30.0754		CHMP1A	-0.280721	7.61175	-7.17066	1.41e-12	1.81e-11	17.915
ALAD	-0.180162	6.30012	-5.57022	3.23e-08	4.17e-07	8.36407		FOXN2	0.288335	7.36827	8.8071	5.2e-18	6.71e-17	30.0637		PTPN12	0.320224	7.16918	7.16988	1.41e-12	1.82e-11	17.9097
PPM1M	-0.267668	6.48763	-5.56525	3.32e-08	4.28e-07	8.33758		RIOK1	0.27455	6.64095	8.80587	5.26e-18	6.78e-17	30.0537		LYZ	0.890857	9.48543	7.16916	1.42e-12	1.83e-11	17.9049
FAM64A	0.338659	6.0635	5.56465	3.33e-08	4.29e-07	8.33434		LRRC42	0.347439	7.45594	8.80333	5.37e-18	6.92e-17	30.0329		HSPA4	0.270309	7.38565	7.16769	1.43e-12	1.84e-11	17.8949
COL6A1	-0.388702	7.07475	-5.56444	3.34e-08	4.29e-07	8.33325		OMD	-0.909246	5.24127	-8.80274	5.4e-18	6.94e-17	30.0282		ASCC2	-0.341723	7.56884	-7.16587	1.45e-12	1.87e-11	17.8826
YARS2	0.19282	7.26492	5.56393	3.35e-08	4.3e-07	8.33053		SPARC	-0.650255	9.18421	-8.8017	5.44e-18	7e-17	30.0196		BTBD1	0.30432	7.4903	7.16026	1.51e-12	1.94e-11	17.8445
WHSC1	0.159855	5.18275	5.56268	3.37e-08	4.33e-07	8.32384		HSPB7	-0.903219	5.27146	-8.80135	5.46e-18	7.01e-17	30.0168		AGGF1	0.217694	6.59202	7.1581	1.53e-12	1.97e-11	17.8299
E2F5	0.348455	6.5536	5.56198	3.38e-08	4.34e-07	8.32012		MYBBP1A	0.25738	5.69572	8.799	5.57e-18	7.14e-17	29.9976		TAOK2	-0.23104	5.50555	-7.15557	1.56e-12	2e-11	17.8127
GDF11	0.220797	4.66218	5.56174	3.39e-08	4.34e-07	8.31885		HSPG2	-0.345667	5.97677	-8.7979	5.62e-18	7.2e-17	29.9887		DTL	0.444342	6.34734	7.15406	1.58e-12	2.02e-11	17.8025
GUCY1A3	-0.5137	7.23235	-5.5616	3.39e-08	4.34e-07	8.31811		NAP1L5	-0.535444	5.92044	-8.79747	5.64e-18	7.22e-17	29.9852		PLA2G4A	0.592574	6.32722	7.15378	1.58e-12	2.02e-11	17.8006
PIH1D2	0.159553	4.28188	5.56077	3.41e-08	4.36e-07	8.3137		MPHOSPH9	0.303306	5.49121	8.79469	5.77e-18	7.39e-17	29.9625		RBM26	0.239977	5.87686	7.15336	1.58e-12	2.03e-11	17.7978
TCERG1	0.139211	6.08038	5.5605	3.41e-08	4.36e-07	8.31227		VBP1	0.288096	8.76384	8.79282	5.86e-18	7.49e-17	29.9473		ANLN	0.574634	6.90216	7.15207	1.6e-12	2.04e-11	17.789
TESK1	-0.21509	6.87763	-5.55554	3.51e-08	4.48e-07	8.28583		EIF3M	0.31601	7.95417	8.78963	6.02e-18	7.69e-17	29.9213		POLR2B	0.225509	7.50276	7.14852	1.64e-12	2.09e-11	17.765
SYT11	-0.352791	6.52959	-5.55445	3.53e-08	4.5e-07	8.28005		ZNF200	0.23683	6.06128	8.78751	6.12e-18	7.82e-17	29.904		UBTF	-0.139582	5.5609	-7.14757	1.65e-12	2.1e-11	17.7586
CCDC34	0.272313	7.09606	5.55427	3.53e-08	4.5e-07	8.27908		CYFIP2	-0.541031	6.28316	-8.78629	6.18e-18	7.89e-17	29.8941		HELLS	0.394269	5.6574	7.1473	1.65e-12	2.11e-11	17.7568
ST6GALNAC3	-0.262243	4.79135	-5.55234	3.57e-08	4.55e-07	8.26882		SIDT2	-0.400619	7.92644	-8.78624	6.19e-18	7.89e-17	29.8937		AKAP5	0.262095	4.18085	7.14694	1.66e-12	2.11e-11	17.7544
KCNE4	-0.258336	4.87794	-5.55204	3.57e-08	4.55e-07	8.2672		TPM3	0.30863	6.64426	8.78437	6.28e-18	8e-17	29.8785		FBXW5	-0.220338	6.63851	-7.14646	1.66e-12	2.11e-11	17.7511
TMC2	0.22011	4.53928	5.55182	3.58e-08	4.55e-07	8.26604		GPBAR1	-0.643787	5.43948	-8.78105	6.46e-18	8.22e-17	29.8515		INF2	-0.348843	6.11264	-7.14482	1.68e-12	2.14e-11	17.74
ZNF423	-0.402942	5.52366	-5.55095	3.6e-08	4.57e-07	8.26142		TPRKB	0.30949	7.28957	8.78031	6.5e-18	8.26e-17	29.8454		CTBP1	-0.229902	7.49026	-7.14321	1.7e-12	2.16e-11	17.7291
TOP1MT	0.237056	5.90524	5.55093	3.6e-08	4.57e-07	8.26129		GNAI1	-0.506982	5.79586	-8.78004	6.51e-18	8.28e-17	29.8433		ROCK1	0.265232	5.85354	7.14007	1.74e-12	2.2e-11	17.7079
DNAJC4	-0.1254	5.30493	-5.54885	3.64e-08	4.62e-07	8.25026		RBM5	-0.301768	7.49496	-8.76815	7.19e-18	9.12e-17	29.7465		SSR3	0.277592	6.66704	7.13947	1.75e-12	2.21e-11	17.7039
PSMC3IP	0.165308	5.44071	5.54823	3.65e-08	4.63e-07	8.24695		C12orf45	0.343257	6.5577	8.76752	7.23e-18	9.16e-17	29.7414		UGP2	0.255826	7.4991	7.13807	1.76e-12	2.23e-11	17.6943
ZNF671	-0.278431	5.32594	-5.54798	3.66e-08	4.63e-07	8.24562		ROR1	-0.47997	5.38998	-8.76672	7.27e-18	9.22e-17	29.7349		GAS6	-0.517373	7.77771	-7.13632	1.78e-12	2.26e-11	17.6825
SLC39A10	0.282081	6.72642	5.54594	3.7e-08	4.68e-07	8.23481		ADAMTS8	-0.656155	4.91585	-8.76537	7.35e-18	9.31e-17	29.724		GPC1	-0.403042	5.66835	-7.13521	1.8e-12	2.27e-11	17.6751
PSMD13	0.136576	6.57593	5.54471	3.72e-08	4.71e-07	8.22823		G3BP1	0.337525	6.84362	8.76151	7.59e-18	9.61e-17	29.6926		MATR3	0.441093	6.6786	7.13454	1.81e-12	2.28e-11	17.6705
TMCO2	0.261875	3.98897	5.54275	3.76e-08	4.76e-07	8.21782		RAB5B	-0.266569	8.1798	-8.76041	7.66e-18	9.69e-17	29.6837		HSP90AA1	0.19526	10.3791	7.1345	1.81e-12	2.28e-11	17.6702
STX6	0.131401	6.79533	5.53975	3.83e-08	4.83e-07	8.20191		TRIOBP	-0.273277	6.97585	-8.75824	7.8e-18	9.85e-17	29.666		NECAB3	-0.254875	5.80502	-7.13096	1.85e-12	2.33e-11	17.6464
TWIST2	-0.26851	4.66185	-5.53975	3.83e-08	4.83e-07	8.2019		LGALS1	-0.566586	9.82774	-8.75606	7.94e-18	1e-16	29.6483		SMARCD3	-0.345784	5.17341	-7.13007	1.86e-12	2.35e-11	17.6403
CRIPAK	-0.224779	5.84441	-5.53772	3.87e-08	4.88e-07	8.19113		EYA3	0.170901	5.01507	8.75531	7.99e-18	1.01e-16	29.6423		OIP5	0.586754	6.74683	7.1271	1.9e-12	2.39e-11	17.6203
GLIS3	-0.354379	5.40455	-5.53665	3.89e-08	4.91e-07	8.18545		ANGPTL1	-0.858186	4.5234	-8.75432	8.06e-18	1.02e-16	29.6342		HERC2	-0.210182	6.91613	-7.12614	1.91e-12	2.41e-11	17.6138
LIN54	0.176526	5.27784	5.53604	3.91e-08	4.92e-07	8.18224		ZNF473	0.274714	5.76214	8.75047	8.32e-18	1.05e-16	29.603		NLRX1	-0.250801	6.17184	-7.125	1.93e-12	2.42e-11	17.6062
SUDS3	0.161241	5.95961	5.53452	3.94e-08	4.96e-07	8.17414		NSDHL	0.344194	6.98011	8.74916	8.41e-18	1.06e-16	29.5924		PHTF1	0.252674	5.81461	7.12395	1.94e-12	2.44e-11	17.5991
TGFB3	-0.336155	5.93347	-5.53083	4.02e-08	5.05e-07	8.1546		NIT2	0.301271	7.81601	8.73892	9.15e-18	1.15e-16	29.5093		MARK3	-0.191887	6.10498	-7.12315	1.95e-12	2.45e-11	17.5936
MYOT	-0.473831	4.37521	-5.52929	4.06e-08	5.09e-07	8.14644		PATL1	0.304279	6.99654	8.73803	9.22e-18	1.16e-16	29.5022		MFN1	0.214319	6.0953	7.11911	2.01e-12	2.52e-11	17.5664
MPZL3	0.23747	4.63395	5.52876	4.07e-08	5.1e-07	8.14366		MYADM	-0.494071	8.18484	-8.73612	9.36e-18	1.17e-16	29.4866		RNF216	-0.286096	6.13919	-7.11793	2.03e-12	2.54e-11	17.5585
WASF2	-0.208841	7.17579	-5.52869	4.07e-08	5.1e-07	8.14324		ARHGAP22	-0.378593	4.65409	-8.73141	9.74e-18	1.22e-16	29.4485		TTLL12	-0.344394	7.66466	-7.1176	2.03e-12	2.54e-11	17.5562
FRY	-0.236858	5.16979	-5.52727	4.1e-08	5.14e-07	8.13575		ENO1	0.30467	9.27887	8.73026	9.83e-18	1.23e-16	29.4392		SNAPC4	-0.317675	6.81585	-7.11677	2.04e-12	2.55e-11	17.5506
CHRD	-0.288674	4.81608	-5.5265	4.12e-08	5.15e-07	8.13168		SNRPA1	0.302064	8.34684	8.72849	9.97e-18	1.25e-16	29.4249		GLI3	-0.343257	5.12023	-7.11619	2.05e-12	2.56e-11	17.5468
RIPK2	0.258327	7.32132	5.52509	4.15e-08	5.19e-07	8.12419		SLC25A39	0.312477	8.56866	8.72559	1.02e-17	1.28e-16	29.4014		MFGE8	-0.492499	7.95326	-7.11535	2.06e-12	2.57e-11	17.5411
SCRG1	-0.776639	5.73774	-5.52432	4.17e-08	5.21e-07	8.12013		TAF8	0.255433	4.81756	8.71921	1.08e-17	1.34e-16	29.3498		TNFSF8	0.291788	4.82902	7.11513	2.07e-12	2.58e-11	17.5396
FMOD	-0.427311	7.19841	-5.5213	4.24e-08	5.29e-07	8.10413		GTF3C4	0.198134	5.35044	8.71749	1.09e-17	1.36e-16	29.3359		RPS6KL1	-0.289428	4.88408	-7.11492	2.07e-12	2.58e-11	17.5382
YDJC	0.247205	6.35542	5.52124	4.24e-08	5.29e-07	8.10382		PARD6B	0.464551	4.92522	8.71128	1.15e-17	1.43e-16	29.2857		HNRNPA3P1	0.37857	4.3444	7.11206	2.11e-12	2.63e-11	17.5189
BRIP1	0.227172	4.81929	5.51726	4.33e-08	5.4e-07	8.08276		FBXO28	0.251032	7.03554	8.71071	1.15e-17	1.44e-16	29.2811		RAB11FIP5	-0.288714	6.57508	-7.11068	2.13e-12	2.65e-11	17.5097
SUV39H2	0.193028	5.38796	5.5165	4.35e-08	5.42e-07	8.07874		SHMT2	0.378014	8.48614	8.70007	1.26e-17	1.57e-16	29.1951		CAMKK1	-0.169341	4.87542	-7.11047	2.13e-12	2.65e-11	17.5083
PDE5A	-0.320235	5.8296	-5.51547	4.38e-08	5.44e-07	8.07329		PRPH2	-0.335821	4.85357	-8.69487	1.32e-17	1.64e-16	29.1532		NRD1	-0.213715	7.9159	-7.10667	2.19e-12	2.72e-11	17.4827
TPP2	0.141467	5.96289	5.51543	4.38e-08	5.44e-07	8.07307		DMPK	-0.496461	5.17838	-8.69149	1.35e-17	1.68e-16	29.1259		C4orf32	0.332287	5.96799	7.10588	2.2e-12	2.73e-11	17.4773
KIF20A	0.372056	6.66731	5.51516	4.39e-08	5.45e-07	8.07167		TAF1A	0.343427	5.315	8.68979	1.37e-17	1.7e-16	29.1122		HOXB5	-0.496676	6.6172	-7.10582	2.2e-12	2.73e-11	17.4769
KIAA0247	-0.192809	7.48056	-5.51496	4.39e-08	5.45e-07	8.07058		AXL	-0.487298	6.83248	-8.68897	1.38e-17	1.71e-16	29.1056		SLFN11	0.481653	6.86501	7.10543	2.21e-12	2.74e-11	17.4743
KRTAP5-9	0.232113	4.33508	5.51146	4.48e-08	5.55e-07	8.05208		PDZRN3	-0.589987	5.31522	-8.68743	1.4e-17	1.73e-16	29.0932		TBL3	-0.311112	5.43312	-7.10226	2.26e-12	2.8e-11	17.453
DCLRE1B	0.162028	5.45169	5.51055	4.5e-08	5.57e-07	8.04732		XRN2	0.358158	6.80825	8.68511	1.42e-17	1.77e-16	29.0744		GPR65	0.430606	5.98818	7.09971	2.3e-12	2.84e-11	17.4358
CAV2	-0.389285	6.70969	-5.50969	4.52e-08	5.6e-07	8.04276		C15orf52	-0.778763	6.57658	-8.68497	1.43e-17	1.77e-16	29.0734		PRRC1	0.269888	7.78679	7.09914	2.31e-12	2.85e-11	17.432
PSAT1	0.4494	6.74847	5.5068	4.59e-08	5.68e-07	8.02749		PLXDC1	-0.289813	5.31027	-8.67794	1.51e-17	1.87e-16	29.0167		C7orf26	-0.21929	6.91099	-7.09743	2.33e-12	2.88e-11	17.4205
ZBTB9	0.17627	6.40156	5.50584	4.62e-08	5.71e-07	8.02243		EBP	0.448745	7.0332	8.67759	1.52e-17	1.87e-16	29.0139		RTN4IP1	0.346893	6.36645	7.0973	2.34e-12	2.88e-11	17.4196
SLCO2A1	-0.418092	7.4101	-5.50493	4.64e-08	5.73e-07	8.01762		ITGA7	-0.665216	5.16597	-8.67586	1.54e-17	1.9e-16	28.9999		TBCD	-0.257539	6.19758	-7.0962	2.35e-12	2.9e-11	17.4122
DLEU1	0.235725	6.25867	5.5009	4.74e-08	5.85e-07	7.99636		TSPAN4	-0.4401	6.52499	-8.67509	1.55e-17	1.91e-16	28.9937		NFIL3	0.359607	7.17408	7.09545	2.37e-12	2.92e-11	17.4072
NDUFA11	-0.193877	8.48873	-5.50032	4.76e-08	5.87e-07	7.99334		CLEC11A	-0.610727	5.85799	-8.67347	1.57e-17	1.93e-16	28.9807		KLHL20	0.241128	6.04545	7.09392	2.39e-12	2.94e-11	17.3969
DMPK	-0.310016	5.17838	-5.49903	4.79e-08	5.9e-07	7.98652		DAB2	-0.508376	6.27021	-8.67161	1.59e-17	1.96e-16	28.9657		POLR2K	0.243016	6.86928	7.09141	2.43e-12	2.99e-11	17.3801
TNKS2	0.183407	5.40038	5.49886	4.8e-08	5.9e-07	7.9856		PTGES2	0.350441	7.21156	8.67062	1.6e-17	1.98e-16	28.9578		VBP1	0.255214	8.76384	7.09088	2.44e-12	3e-11	17.3765
ZNF195	0.229473	6.78289	5.49881	4.8e-08	5.9e-07	7.98535		MMP12	1.26614	7.54478	8.67033	1.61e-17	1.98e-16	28.9555		UBE2V2	0.283649	7.15377	7.09064	2.45e-12	3e-11	17.3749
CREB3L2	-0.209108	7.24697	-5.49589	4.88e-08	5.99e-07	7.96997		AHSA1	0.308532	8.16924	8.66883	1.63e-17	2e-16	28.9434		DNM1	-0.517527	5.28406	-7.08944	2.47e-12	3.03e-11	17.3668
DNAJA1	0.180969	9.48923	5.49569	4.88e-08	6e-07	7.96891		CRIP2	-0.600596	7.12614	-8.66729	1.65e-17	2.02e-16	28.931		RNF14	0.224488	6.55792	7.08879	2.48e-12	3.04e-11	17.3625
GSTM5	-0.233536	5.14978	-5.49545	4.89e-08	6e-07	7.96765		HMBOX1	-0.286353	5.85766	-8.66624	1.66e-17	2.04e-16	28.9226		PSMA5	0.254538	8.68863	7.08845	2.48e-12	3.04e-11	17.3602
SOBP	-0.240374	4.69068	-5.49277	4.96e-08	6.08e-07	7.95353		ATP2B4	-0.550037	7.07772	-8.66581	1.67e-17	2.05e-16	28.919		TAF6L	-0.268338	5.85501	-7.08801	2.49e-12	3.05e-11	17.3573
IGF2BP1	0.253339	4.23733	5.49109	5.01e-08	6.13e-07	7.94467		GLMN	0.314628	6.28389	8.66105	1.74e-17	2.13e-16	28.8807		CNNM3	-0.269053	6.91823	-7.08322	2.57e-12	3.15e-11	17.3251
ZNF10	-0.209302	5.11523	-5.48812	5.09e-08	6.23e-07	7.92907		OSGIN2	0.308681	5.67811	8.65982	1.75e-17	2.15e-16	28.8709		C14orf166	0.269617	9.05759	7.08286	2.58e-12	3.15e-11	17.3227
IGFBP4	-0.446003	8.22423	-5.48586	5.15e-08	6.3e-07	7.91714		GEMIN5	0.295608	6.15856	8.65935	1.76e-17	2.15e-16	28.8671		DMAP1	-0.333508	6.70445	-7.0801	2.63e-12	3.21e-11	17.3041
STX12	-0.175615	7.49555	-5.48449	5.19e-08	6.35e-07	7.90994		GLO1	0.380247	9.34044	8.65779	1.78e-17	2.18e-16	28.8546		UBE2T	0.515799	7.23088	7.07807	2.67e-12	3.25e-11	17.2906
CAMTA2	-0.152322	5.36924	-5.48318	5.23e-08	6.39e-07	7.90306		BCHE	-0.986731	4.83478	-8.65499	1.82e-17	2.23e-16	28.8321		UTP3	0.266853	6.89883	7.07676	2.69e-12	3.28e-11	17.2818
SGOL1	0.249028	4.90494	5.48277	5.24e-08	6.4e-07	7.90092		PDP2	0.241849	5.17322	8.65402	1.84e-17	2.24e-16	28.8243		CSF2RB	0.419282	5.70902	7.07595	2.71e-12	3.3e-11	17.2763
THSD4	-0.205488	4.70634	-5.48169	5.27e-08	6.43e-07	7.89524		RMND1	0.282962	5.82895	8.65151	1.88e-17	2.29e-16	28.8041		NCSTN	-0.250674	7.53758	-7.07365	2.75e-12	3.35e-11	17.2609
YKT6	0.214259	5.71717	5.48011	5.32e-08	6.48e-07	7.88692		MRPS5	0.233325	6.92648	8.65024	1.9e-17	2.31e-16	28.7939		EMD	-0.247366	7.76099	-7.07004	2.82e-12	3.43e-11	17.2367
USP43	0.19035	4.78217	5.47985	5.33e-08	6.48e-07	7.88555		TMEM33	0.333748	6.73086	8.64878	1.92e-17	2.34e-16	28.7822		DCUN1D5	0.31731	7.05379	7.06835	2.85e-12	3.47e-11	17.2254
CAPN2	-0.198681	7.30176	-5.47722	5.4e-08	6.57e-07	7.87177		GPR146	-0.369565	4.58514	-8.64513	1.98e-17	2.4e-16	28.7529		BCAR1	-0.34313	5.97307	-7.06669	2.89e-12	3.5e-11	17.2143
ZNF239	0.270647	6.55603	5.47497	5.47e-08	6.65e-07	7.85995		ATP1A2	-0.853942	4.65154	-8.64348	2e-17	2.43e-16	28.7396		FZD6	0.406182	6.85269	7.06538	2.91e-12	3.53e-11	17.2055
KIF13B	-0.255886	7.36058	-5.47301	5.53e-08	6.71e-07	7.84969		FRMD5	0.527131	4.96471	8.64293	2.01e-17	2.44e-16	28.7352		PAF1	-0.25628	7.12091	-7.06277	2.96e-12	3.59e-11	17.1881
TOX	-0.38743	5.41304	-5.47002	5.62e-08	6.82e-07	7.83399		CD34	-0.483911	6.41309	-8.63789	2.1e-17	2.54e-16	28.6948		ERBB4	-0.243193	4.24543	-7.06185	2.98e-12	3.61e-11	17.1819
C2	0.366987	6.12683	5.46944	5.64e-08	6.84e-07	7.83094		LSAMP	-0.50836	5.1497	-8.63754	2.1e-17	2.55e-16	28.692		CD69	0.620548	6.2631	7.06134	2.99e-12	3.62e-11	17.1785
AFAP1	-0.251205	5.41692	-5.46894	5.66e-08	6.85e-07	7.82829		SORBS1	-0.742188	6.21072	-8.62977	2.24e-17	2.71e-16	28.6296		CAND1	0.277692	6.45788	7.05872	3.05e-12	3.68e-11	17.161
FBL	0.20745	9.11522	5.46805	5.68e-08	6.88e-07	7.82366		EFS	-0.426884	5.06083	-8.62898	2.26e-17	2.73e-16	28.6233		VPS28	-0.272107	8.21107	-7.05853	3.05e-12	3.69e-11	17.1597
CTSK	-0.43832	8.33872	-5.46727	5.71e-08	6.9e-07	7.81955		COL6A3	-0.656872	9.74699	-8.62762	2.28e-17	2.76e-16	28.6124		RHBDD2	-0.302225	7.81988	-7.05516	3.12e-12	3.77e-11	17.1371
GAS6	-0.35611	7.77771	-5.46692	5.72e-08	6.91e-07	7.81772		METAP1	0.263258	8.16676	8.62553	2.32e-17	2.8e-16	28.5956		TMEM33	0.299	6.73086	7.0536	3.16e-12	3.81e-11	17.1267
SNRK	-0.17899	6.99251	-5.46631	5.74e-08	6.93e-07	7.81449		RUVBL2	0.329805	7.34377	8.62541	2.32e-17	2.8e-16	28.5947		ALG6	0.251974	7.30246	7.05182	3.2e-12	3.85e-11	17.1148
HAGH	-0.161957	7.32054	-5.46599	5.75e-08	6.93e-07	7.81284		ANXA5	-0.35083	9.45478	-8.62346	2.36e-17	2.85e-16	28.5791		IGJ	1.20733	8.33361	7.05035	3.23e-12	3.89e-11	17.105
YWHAB	0.151466	9.76893	5.4655	5.76e-08	6.95e-07	7.81029		KIAA1644	-0.64169	4.95001	-8.62299	2.37e-17	2.85e-16	28.5754		MSR1	0.393817	4.99085	7.05007	3.23e-12	3.89e-11	17.1032
WDR89	0.114386	5.21311	5.464	5.81e-08	7e-07	7.8024		ITPR1	-0.521016	6.01298	-8.62224	2.38e-17	2.87e-16	28.5693		OXCT2	-0.294789	4.86742	-7.04544	3.34e-12	4.01e-11	17.0722
NUP54	0.14663	6.60547	5.46373	5.82e-08	7e-07	7.80102		PDK4	-0.835334	6.33061	-8.62171	2.39e-17	2.88e-16	28.5651		SPOPL	0.277017	6.39093	7.04415	3.37e-12	4.05e-11	17.0636
BCL2L12	0.240939	6.61738	5.46228	5.87e-08	7.05e-07	7.79342		CBX2	0.463461	5.23074	8.61934	2.44e-17	2.93e-16	28.5461		ISOC1	0.300282	7.59722	7.04377	3.38e-12	4.05e-11	17.0611
TSPAN9	-0.245133	7.29021	-5.46179	5.88e-08	7.07e-07	7.79083		GSTM5	-0.370735	5.14978	-8.61034	2.63e-17	3.15e-16	28.4741		HMGB1	0.338687	8.21608	7.04028	3.46e-12	4.15e-11	17.0378
VRK2	0.244229	6.70485	5.46159	5.89e-08	7.07e-07	7.78976		ASB7	0.198124	5.52436	8.60928	2.65e-17	3.18e-16	28.4656		CC2D1A	-0.240773	5.37859	-7.03728	3.53e-12	4.23e-11	17.0177
TP53INP2	-0.253355	7.04111	-5.46071	5.92e-08	7.09e-07	7.7852		SLC25A33	0.310036	5.91192	8.60443	2.76e-17	3.31e-16	28.4268		SAFB2	-0.233019	7.1568	-7.03602	3.56e-12	4.26e-11	17.0094
LTC4S	-0.298719	4.84549	-5.46071	5.92e-08	7.09e-07	7.78516		ARHGAP11A	0.416562	4.80154	8.60309	2.79e-17	3.34e-16	28.416		PCNXL2	-0.216338	4.90079	-7.03035	3.7e-12	4.43e-11	16.9716
TAP1	0.328828	9.31233	5.45898	5.97e-08	7.15e-07	7.77611		COL4A2	-0.547751	7.73204	-8.59962	2.87e-17	3.43e-16	28.3883		NUP107	0.315244	7.93432	7.02895	3.74e-12	4.47e-11	16.9622
DNAJC18	-0.184613	5.08884	-5.45812	6e-08	7.18e-07	7.77164		ADAMTSL3	-0.482156	4.96892	-8.5996	2.87e-17	3.43e-16	28.3882		FAM20C	-0.351507	5.76784	-7.02554	3.83e-12	4.57e-11	16.9395
PDHX	0.236404	7.66124	5.45759	6.02e-08	7.2e-07	7.76886		CD59	-0.387428	7.46083	-8.59922	2.88e-17	3.44e-16	28.3851		SEMA5B	-0.365669	5.28199	-7.02444	3.85e-12	4.6e-11	16.9322
YPEL2	-0.203664	6.21741	-5.45728	6.03e-08	7.2e-07	7.76722		DPH2	0.306408	6.6464	8.59731	2.92e-17	3.49e-16	28.3699		VPS16	-0.255025	6.37942	-7.02292	3.89e-12	4.65e-11	16.9221
LPPR4	-0.348597	5.03796	-5.45721	6.03e-08	7.2e-07	7.76687		CRISPLD1	-0.715703	5.42488	-8.59452	2.99e-17	3.57e-16	28.3476		SBF1	-0.280281	6.45785	-7.01984	3.98e-12	4.74e-11	16.9016
CYR61	-0.464872	8.07619	-5.45709	6.04e-08	7.2e-07	7.76623		HIGD1B	-0.51772	4.76364	-8.59366	3.01e-17	3.59e-16	28.3407		SRP54	0.235844	7.90159	7.01858	4.01e-12	4.78e-11	16.8932
WDR4	0.203883	6.25004	5.45349	6.16e-08	7.34e-07	7.7474		MOXD1	-0.619739	5.79068	-8.58926	3.12e-17	3.72e-16	28.3056		SLC30A6	0.171277	5.56002	7.01839	4.02e-12	4.78e-11	16.892
KL	-0.316392	4.71216	-5.45203	6.2e-08	7.39e-07	7.73978		SLC30A6	0.190747	5.56002	8.586	3.2e-17	3.81e-16	28.2796		ZER1	-0.214526	5.45756	-7.0181	4.03e-12	4.79e-11	16.89
MN1	-0.459483	5.92607	-5.45007	6.27e-08	7.46e-07	7.72951		SEC23B	0.394022	7.998	8.58455	3.24e-17	3.85e-16	28.268		TIPRL	0.22639	6.94656	7.01711	4.05e-12	4.81e-11	16.8835
MRPS18C	0.181049	6.79227	5.44921	6.3e-08	7.49e-07	7.72502		RNF8	0.233794	5.53233	8.58204	3.31e-17	3.93e-16	28.248		ZNF337	-0.281874	6.5321	-7.01682	4.06e-12	4.82e-11	16.8815
BTBD8	0.249806	3.47938	5.44876	6.32e-08	7.5e-07	7.72264		TWISTNB	0.275021	6.01089	8.57913	3.39e-17	4.02e-16	28.2247		PIAS3	-0.266849	6.00616	-7.01443	4.13e-12	4.9e-11	16.8656
TRIAP1	0.157036	7.65431	5.44839	6.33e-08	7.51e-07	7.72073		NLGN1	-0.54946	4.38116	-8.57687	3.45e-17	4.09e-16	28.2068		SLC17A1	0.275601	3.69664	7.01239	4.19e-12	4.96e-11	16.852
DIXDC1	-0.32821	5.78214	-5.44657	6.39e-08	7.58e-07	7.71123		SEPHS1	0.26775	7.27103	8.576	3.47e-17	4.12e-16	28.1998		TIMM8B	0.283807	7.14239	7.00914	4.28e-12	5.07e-11	16.8304
LEPRE1	-0.222376	6.51702	-5.4458	6.42e-08	7.61e-07	7.70718		CHTF18	0.419014	5.99568	8.57596	3.47e-17	4.12e-16	28.1995		LMNA	-0.297987	7.8879	-7.00863	4.29e-12	5.08e-11	16.8271
SFPQ	0.184215	6.73127	5.44406	6.48e-08	7.68e-07	7.69812		DLEU2	0.371378	4.91293	8.57573	3.48e-17	4.12e-16	28.1976		LEMD2	-0.276652	6.56378	-7.00842	4.3e-12	5.08e-11	16.8257
DLG4	-0.223523	4.87798	-5.44165	6.57e-08	7.77e-07	7.68552		SAC3D1	0.439985	7.27793	8.57549	3.49e-17	4.13e-16	28.1957		PPP2R1A	-0.269235	8.39461	-7.00776	4.32e-12	5.1e-11	16.8213
CASZ1	-0.209718	5.93314	-5.44123	6.58e-08	7.78e-07	7.68335		TPSAB1	-0.882322	6.52047	-8.57338	3.55e-17	4.19e-16	28.179		SFTPB	-0.20208	4.82827	-7.00766	4.32e-12	5.1e-11	16.8206
MS4A2	-0.31085	4.57698	-5.4404	6.61e-08	7.81e-07	7.67899		ZNF7	0.261113	5.88557	8.57308	3.56e-17	4.2e-16	28.1765		BRAP	0.270978	5.44428	7.00594	4.37e-12	5.16e-11	16.8092
GPBAR1	-0.393648	5.43948	-5.44009	6.62e-08	7.82e-07	7.67738		RTN4IP1	0.381441	6.36645	8.57277	3.57e-17	4.21e-16	28.1741		ANKZF1	-0.259189	5.82579	-7.00442	4.42e-12	5.21e-11	16.7991
EBPL	0.249274	8.25164	5.43954	6.64e-08	7.83e-07	7.6745		UTP11L	0.236707	6.89515	8.57016	3.64e-17	4.3e-16	28.1533		DDX60	0.592963	7.43247	7.00383	4.44e-12	5.23e-11	16.7952
VPS13D	-0.121358	5.22437	-5.43943	6.65e-08	7.83e-07	7.67396		MREG	0.347774	5.42549	8.564	3.83e-17	4.51e-16	28.1042		NUDT5	0.345431	7.92564	7.00299	4.46e-12	5.25e-11	16.7896
ZSWIM6	-0.199383	7.57951	-5.43939	6.65e-08	7.83e-07	7.67373		FANCG	0.366773	6.99086	8.56126	3.91e-17	4.61e-16	28.0824		MKNK1	-0.194088	6.21541	-7.00198	4.49e-12	5.28e-11	16.7829
DNPEP	0.156731	6.60475	5.43862	6.68e-08	7.86e-07	7.66971		ILK	-0.392923	8.13932	-8.56119	3.92e-17	4.61e-16	28.0818		CREBZF	0.236859	6.00699	6.99566	4.69e-12	5.51e-11	16.7409
ABHD12	0.205537	7.20382	5.43852	6.68e-08	7.86e-07	7.6692		LOC81691	0.405089	5.7678	8.56099	3.92e-17	4.61e-16	28.0803		TELO2	-0.292263	6.0104	-6.99504	4.71e-12	5.53e-11	16.7368
PSMB9	0.351385	7.7431	5.43793	6.7e-08	7.87e-07	7.66615		MYO19	0.323082	5.74953	8.55927	3.98e-17	4.67e-16	28.0666		CXCL9	0.948613	7.51732	6.99264	4.79e-12	5.62e-11	16.7209
DHRS13	0.249795	6.03862	5.43791	6.7e-08	7.87e-07	7.66602		COL8A1	-0.792307	6.42147	-8.55843	4e-17	4.7e-16	28.0599		SRPK3	-0.377836	5.23353	-6.99007	4.87e-12	5.71e-11	16.7039
STAG2	0.181653	7.34592	5.43746	6.72e-08	7.88e-07	7.66368		TTLL7	-0.637876	4.71733	-8.55518	4.11e-17	4.82e-16	28.034		GPSM1	-0.375244	5.84822	-6.98995	4.88e-12	5.71e-11	16.7031
ARMCX1	-0.391116	6.3696	-5.43573	6.78e-08	7.95e-07	7.65467		PBX1	-0.49495	6.29487	-8.55416	4.15e-17	4.86e-16	28.0259		BTBD10	0.263718	7.21752	6.98945	4.89e-12	5.73e-11	16.6998
ACP1	0.219604	7.97096	5.43454	6.83e-08	8e-07	7.64846		GPR19	0.472636	4.52261	8.55392	4.15e-17	4.87e-16	28.024		MRPL1	0.294787	7.50329	6.98869	4.92e-12	5.75e-11	16.6947
MRPL1	0.205937	7.50329	5.43388	6.85e-08	8.02e-07	7.64499		DCUN1D5	0.349535	7.05379	8.55304	4.18e-17	4.9e-16	28.017		PRDX4	0.318613	9.56838	6.98606	5.01e-12	5.85e-11	16.6773
LOC646762	0.148413	5.10965	5.43371	6.86e-08	8.02e-07	7.64414		PFAS	0.32779	6.73949	8.55234	4.21e-17	4.92e-16	28.0114		POLR2J4	-0.247531	5.03104	-6.98386	5.08e-12	5.94e-11	16.6627
DPYSL3	-0.525322	7.63966	-5.43345	6.87e-08	8.02e-07	7.64277		ARL5B	0.362362	6.40525	8.54643	4.41e-17	5.16e-16	27.9644		BSDC1	-0.246076	7.02738	-6.98364	5.09e-12	5.94e-11	16.6613
TMED2	0.206958	8.7964	5.43298	6.89e-08	8.04e-07	7.64031		BUD13	0.209804	6.3844	8.5457	4.44e-17	5.18e-16	27.9586		SRGAP1	-0.372895	6.00154	-6.98323	5.11e-12	5.95e-11	16.6585
PAX3	0.163095	4.00075	5.43148	6.94e-08	8.1e-07	7.63251		MAN2B2	-0.385912	7.19882	-8.53985	4.66e-17	5.43e-16	27.9122		PRMT3	0.307769	7.49184	6.98037	5.21e-12	6.06e-11	16.6396
BCL2A1	0.381092	5.80984	5.43028	6.99e-08	8.15e-07	7.62626		NUDT1	0.393858	6.67498	8.53621	4.79e-17	5.59e-16	27.8832		FCGR1B	0.576264	5.71854	6.97715	5.32e-12	6.19e-11	16.6183
NBEA	-0.427277	5.46751	-5.42715	7.11e-08	8.28e-07	7.60994		LAYN	-0.521851	5.20316	-8.53507	4.84e-17	5.64e-16	27.8742		PPP1R14B	-0.324954	8.19598	-6.97562	5.38e-12	6.25e-11	16.6082
HTRA1	-0.378284	8.49241	-5.42293	7.27e-08	8.47e-07	7.58796		HSPA2	-0.681545	6.43289	-8.5336	4.9e-17	5.7e-16	27.8625		PLS3	0.311397	8.97475	6.97331	5.46e-12	6.35e-11	16.5929
FAM91A1	0.213988	6.61027	5.42078	7.36e-08	8.56e-07	7.5768		SGIP1	-0.52465	5.21709	-8.53268	4.93e-17	5.74e-16	27.8552		DMD	-0.351886	4.87474	-6.97301	5.47e-12	6.36e-11	16.5909
CDC42BPA	-0.210157	6.16908	-5.42041	7.37e-08	8.57e-07	7.57488		AASDHPPT	0.269721	6.7662	8.53146	4.98e-17	5.79e-16	27.8455		PTPRC	0.37548	5.55122	6.969	5.62e-12	6.53e-11	16.5644
SNTA1	-0.215526	6.04752	-5.41973	7.4e-08	8.59e-07	7.57132		APOO	0.388282	6.91396	8.52787	5.13e-17	5.96e-16	27.817		DPY30	0.244302	8.39038	6.96524	5.77e-12	6.69e-11	16.5395
FLJ40288	0.210633	4.46839	5.41965	7.4e-08	8.59e-07	7.57095		RGL1	-0.521096	7.52777	-8.52625	5.2e-17	6.03e-16	27.8042		TENC1	-0.373128	5.46546	-6.96372	5.83e-12	6.75e-11	16.5295
OR2H2	0.172489	4.50179	5.41746	7.49e-08	8.69e-07	7.55952		AMMECR1	0.324277	5.99635	8.5238	5.3e-17	6.15e-16	27.7848		TTLL5	-0.199174	5.43485	-6.95897	6.02e-12	6.97e-11	16.4981
SOX17	-0.244173	4.95279	-5.41709	7.51e-08	8.7e-07	7.55762		PFDN2	0.320471	6.61801	8.52148	5.4e-17	6.26e-16	27.7664		MED12	-0.245991	6.1444	-6.95838	6.05e-12	6.99e-11	16.4942
ADSS	0.150808	7.10972	5.41569	7.57e-08	8.76e-07	7.55036		DHRS13	0.396602	6.03862	8.5214	5.4e-17	6.26e-16	27.7658		DNAJB4	0.382688	5.94317	6.95679	6.11e-12	7.06e-11	16.4837
HMBS	0.200044	6.8676	5.41479	7.6e-08	8.79e-07	7.54568		AOX1	-0.585612	5.05036	-8.52025	5.45e-17	6.31e-16	27.7566		IL6ST	0.241778	5.61986	6.95633	6.13e-12	7.08e-11	16.4807
CCM2	-0.1715	7.14467	-5.41456	7.61e-08	8.8e-07	7.54445		DHX15	0.210053	9.13628	8.51638	5.63e-17	6.51e-16	27.7259		C10orf88	0.25537	5.76422	6.95617	6.14e-12	7.08e-11	16.4796
NPR2	-0.189375	5.26833	-5.41386	7.64e-08	8.83e-07	7.54082		NCBP2	0.285721	7.26469	8.51592	5.65e-17	6.52e-16	27.7223		RAB5B	-0.232432	8.1798	-6.9537	6.24e-12	7.2e-11	16.4634
NCR1	0.187535	4.20609	5.41255	7.7e-08	8.88e-07	7.53403		ALG3	0.32531	7.00838	8.514	5.74e-17	6.62e-16	27.7071		DHX30	-0.218828	6.35454	-6.95325	6.26e-12	7.21e-11	16.4604
LRRC49	-0.277065	5.81924	-5.4109	7.76e-08	8.95e-07	7.52547		MAOB	-0.682393	5.4868	-8.51149	5.85e-17	6.75e-16	27.6872		MAP2K1	0.253449	7.63167	6.95232	6.3e-12	7.25e-11	16.4542
ZNF146	0.197432	7.489	5.41058	7.78e-08	8.96e-07	7.52382		USP43	0.299517	4.78217	8.51026	5.91e-17	6.81e-16	27.6775		ZMYND19	-0.345088	7.08519	-6.94922	6.43e-12	7.4e-11	16.4338
ANKDD1A	-0.275612	5.45162	-5.41019	7.79e-08	8.98e-07	7.52178		PUSL1	0.372225	6.01223	8.50905	5.97e-17	6.88e-16	27.6679		AP3D1	-0.208612	7.13943	-6.94525	6.61e-12	7.6e-11	16.4076
BRCC3	0.204709	6.80831	5.40923	7.84e-08	9.02e-07	7.51682		DOK6	-0.371744	4.16887	-8.50824	6.01e-17	6.92e-16	27.6614		GMEB2	-0.254615	7.39752	-6.94486	6.63e-12	7.61e-11	16.4051
STOML2	0.19133	8.63053	5.40885	7.85e-08	9.03e-07	7.51482		CHKB	-0.317342	7.03242	-8.50611	6.11e-17	7.03e-16	27.6446		SMC4	0.297403	7.20105	6.9448	6.63e-12	7.61e-11	16.4047
CKAP2L	0.372182	6.19602	5.40733	7.92e-08	9.09e-07	7.50695		C2orf15	0.60236	4.86034	8.50581	6.13e-17	7.04e-16	27.6422		ZNF670	0.307039	5.0255	6.94474	6.63e-12	7.61e-11	16.4042
CKAP5	0.188912	7.69954	5.40466	8.03e-08	9.22e-07	7.49309		ZBTB24	0.260345	6.03201	8.50069	6.39e-17	7.33e-16	27.6017		BCAS2	0.269235	6.56742	6.94458	6.64e-12	7.61e-11	16.4032
METAP2	0.172789	8.21548	5.40433	8.05e-08	9.23e-07	7.4914		AFF3	-0.428551	4.31085	-8.49939	6.45e-17	7.4e-16	27.5915		ZNF282	-0.265206	6.29657	-6.94389	6.67e-12	7.64e-11	16.3987
C17orf47	0.211751	3.9697	5.40251	8.13e-08	9.31e-07	7.48193		DNAJB5	-0.590644	5.04182	-8.49844	6.5e-17	7.46e-16	27.5839		ICAM1	0.418836	5.70288	6.94235	6.74e-12	7.71e-11	16.3885
CCT7	0.154868	8.87467	5.40162	8.17e-08	9.35e-07	7.47731		PGM2	0.279832	7.06009	8.49282	6.81e-17	7.79e-16	27.5395		IFI16	0.508225	7.88556	6.94097	6.8e-12	7.78e-11	16.3794
AHSA1	0.18973	8.16924	5.4012	8.18e-08	9.37e-07	7.47512		PUF60	0.331383	8.93028	8.48726	7.12e-17	8.15e-16	27.4955		CYHR1	-0.215486	5.51248	-6.94069	6.82e-12	7.79e-11	16.3776
TROAP	0.30253	6.12325	5.40036	8.22e-08	9.4e-07	7.47078		THSD4	-0.32231	4.70634	-8.48612	7.18e-17	8.21e-16	27.4865		TARP	0.305306	4.16705	6.94053	6.82e-12	7.79e-11	16.3765
ITPKB	-0.287964	5.59412	-5.39835	8.31e-08	9.5e-07	7.4604		PCSK9	0.651714	5.55705	8.4853	7.23e-17	8.26e-16	27.4801		NXF1	-0.216746	7.47863	-6.93821	6.93e-12	7.91e-11	16.3612
SEC62	-0.231998	7.47232	-5.3963	8.4e-08	9.6e-07	7.44979		RGS5	-0.649005	7.47524	-8.48487	7.26e-17	8.28e-16	27.4766		KPNA3	0.293861	7.62555	6.93687	6.99e-12	7.97e-11	16.3524
PTGDS	-0.58508	7.2246	-5.39493	8.47e-08	9.66e-07	7.44267		ANKDD1A	-0.437651	5.45162	-8.47909	7.6e-17	8.67e-16	27.431		RHOH	0.379571	5.04903	6.93498	7.08e-12	8.07e-11	16.34
GTF3C4	0.120974	5.35044	5.39285	8.56e-08	9.76e-07	7.4319		PPP5C	0.30715	5.21923	8.47778	7.68e-17	8.75e-16	27.4207		NCOA7	0.372002	8.19253	6.93496	7.08e-12	8.07e-11	16.3398
C19orf26	0.203805	4.3964	5.39264	8.57e-08	9.77e-07	7.43084		TNFRSF1A	-0.295696	8.20278	-8.47774	7.68e-17	8.75e-16	27.4203		CHPF	-0.37268	6.78152	-6.93367	7.15e-12	8.13e-11	16.3314
MFAP5	-0.588597	6.67668	-5.39042	8.68e-08	9.88e-07	7.41932		HSD17B6	-0.659708	5.42063	-8.4736	7.94e-17	9.04e-16	27.3877		DPP7	-0.27355	6.49177	-6.93184	7.24e-12	8.22e-11	16.3193
NOLC1	0.229232	7.05783	5.38987	8.7e-08	9.9e-07	7.41647		GPX3	-0.658996	7.21864	-8.47341	7.96e-17	9.05e-16	27.3862		KLRD1	0.426408	5.09867	6.93063	7.3e-12	8.29e-11	16.3114
PIK3R5	0.16584	4.72165	5.38968	8.71e-08	9.9e-07	7.41552		LSM6	0.355376	6.71316	8.47	8.18e-17	9.29e-16	27.3593		PIGQ	-0.291939	6.11315	-6.93049	7.3e-12	8.29e-11	16.3105
COQ2	0.210019	6.9528	5.38792	8.8e-08	9.99e-07	7.40638		LXN	-0.55777	7.60217	-8.46691	8.38e-17	9.52e-16	27.3349		CCNA2	0.524494	6.98699	6.92701	7.48e-12	8.48e-11	16.2875
HBP1	-0.140153	6.59586	-5.38524	8.92e-08	1.01e-06	7.39256		ZNHIT2	0.325944	5.43438	8.46657	8.41e-17	9.54e-16	27.3323		WDR12	0.288474	6.91635	6.92583	7.54e-12	8.54e-11	16.2798
TMEM43	-0.20688	7.44004	-5.38468	8.95e-08	1.02e-06	7.38966		CAND2	-0.466472	5.03533	-8.46332	8.63e-17	9.78e-16	27.3066		RALY	-0.279177	8.15227	-6.9248	7.59e-12	8.59e-11	16.273
CD3EAP	0.185229	5.71299	5.38401	8.98e-08	1.02e-06	7.38617		MFGE8	-0.533203	7.95326	-8.46212	8.71e-17	9.87e-16	27.2972		RAB5A	0.224518	7.27523	6.92388	7.64e-12	8.64e-11	16.267
DDX27	0.266612	7.48224	5.3827	9.05e-08	1.02e-06	7.37943		TBC1D7	0.324258	6.35799	8.45936	8.91e-17	1.01e-15	27.2755		ATG5	0.270654	7.14619	6.92384	7.64e-12	8.64e-11	16.2667
ZC3H15	0.220413	7.49933	5.38268	9.05e-08	1.02e-06	7.37933		FAM83H	0.617858	7.23068	8.45755	9.04e-17	1.02e-15	27.2612		NKAP	0.236323	6.00397	6.92238	7.71e-12	8.71e-11	16.2571
PSTK	0.168077	5.02924	5.38176	9.09e-08	1.03e-06	7.37459		CRLS1	0.351151	7.86149	8.4521	9.44e-17	1.07e-15	27.2182		BRD7	0.209824	7.05183	6.9219	7.74e-12	8.74e-11	16.254
DNAJB5	-0.369159	5.04182	-5.38171	9.1e-08	1.03e-06	7.3743		HOOK1	0.588555	7.15892	8.45159	9.48e-17	1.07e-15	27.2142		DCLK2	-0.282679	4.25581	-6.92093	7.79e-12	8.79e-11	16.2476
TMEM88	-0.258537	5.4646	-5.37842	9.26e-08	1.05e-06	7.35733		VCAN	-0.64672	8.03542	-8.44816	9.74e-17	1.1e-15	27.1872		PBX4	-0.39157	5.35067	-6.91995	7.84e-12	8.84e-11	16.2411
NDOR1	0.155528	4.90596	5.37653	9.35e-08	1.05e-06	7.34757		TGFB3	-0.520073	5.93347	-8.44543	9.96e-17	1.12e-15	27.1658		TAOK1	-0.367339	6.49236	-6.91777	7.96e-12	8.96e-11	16.2269
FGFR1OP	0.203587	6.00017	5.37644	9.36e-08	1.05e-06	7.34708		RPUSD4	0.270926	7.85121	8.44483	1e-16	1.13e-15	27.1611		MYH9	-0.245134	8.99992	-6.91621	8.04e-12	9.05e-11	16.2166
SPARC	-0.391972	9.18421	-5.37565	9.4e-08	1.06e-06	7.34302		NPM1	0.151684	7.25847	8.43694	1.07e-16	1.2e-15	27.099		ZNF267	0.221744	5.75584	6.9129	8.22e-12	9.25e-11	16.1949
PKNOX2	-0.171401	4.6813	-5.37494	9.43e-08	1.06e-06	7.33937		EFNA4	0.374344	6.23284	8.4368	1.07e-16	1.2e-15	27.0979		TRIM5	0.282639	5.66752	6.91182	8.28e-12	9.31e-11	16.1878
SLC13A3	0.19264	4.45788	5.37476	9.44e-08	1.06e-06	7.33841		MRPL45	0.30855	7.37307	8.43517	1.08e-16	1.22e-15	27.0851		SGTA	-0.256369	6.15304	-6.90819	8.49e-12	9.53e-11	16.164
TRIP13	0.383832	7.10703	5.37399	9.48e-08	1.07e-06	7.33445		BGN	-0.625358	8.911	-8.43423	1.09e-16	1.22e-15	27.0777		RHOBTB2	-0.275024	5.19683	-6.90798	8.5e-12	9.54e-11	16.1626
MFSD4	-0.39126	5.0184	-5.3739	9.49e-08	1.07e-06	7.33399		TMEM177	0.329587	6.20717	8.4336	1.1e-16	1.23e-15	27.0727		STK16	0.182855	5.39283	6.90635	8.59e-12	9.64e-11	16.1519
ULK1	-0.240041	6.72089	-5.37367	9.5e-08	1.07e-06	7.33283		PFDN4	0.308568	6.11304	8.43307	1.1e-16	1.23e-15	27.0686		BIRC2	0.23985	8.31887	6.90624	8.6e-12	9.64e-11	16.1512
CHKB	-0.19785	7.03242	-5.37319	9.52e-08	1.07e-06	7.33034		CD1C	-0.539413	5.30848	-8.43223	1.11e-16	1.24e-15	27.062		NCR1	0.266307	4.20609	6.9058	8.63e-12	9.66e-11	16.1483
SLC27A5	0.271347	5.47154	5.37202	9.58e-08	1.07e-06	7.32432		FASTKD3	0.32116	6.72562	8.42807	1.14e-16	1.28e-15	27.0293		ABHD5	0.281108	5.78944	6.90466	8.69e-12	9.73e-11	16.1408
DBF4	0.196357	6.08305	5.37175	9.6e-08	1.07e-06	7.3229		SQLE	0.647571	6.80843	8.42742	1.15e-16	1.29e-15	27.0242		DOCK8	0.402908	6.06379	6.9005	8.94e-12	9.99e-11	16.1136
BGN	-0.392996	8.911	-5.37029	9.67e-08	1.08e-06	7.31538		EMP3	-0.521915	7.58972	-8.42713	1.15e-16	1.29e-15	27.0219		TRIM22	0.532567	7.5099	6.90025	8.96e-12	1e-10	16.1119
GTF3C2	0.126891	7.44772	5.37006	9.69e-08	1.08e-06	7.31422		KL	-0.495363	4.71216	-8.42486	1.17e-16	1.31e-15	27.0041		BRD2	-0.255992	8.60116	-6.89669	9.17e-12	1.02e-10	16.0886
MRPL39	0.214501	6.39311	5.36864	9.76e-08	1.09e-06	7.30688		TEX10	0.265363	6.50439	8.42417	1.18e-16	1.32e-15	26.9987		BCKDK	-0.220758	7.59554	-6.89515	9.27e-12	1.03e-10	16.0785
GATC	0.188094	6.1936	5.36732	9.83e-08	1.1e-06	7.3001		FYN	-0.385666	6.48837	-8.42376	1.18e-16	1.32e-15	26.9955		CKS2	0.505965	8.81815	6.89036	9.57e-12	1.07e-10	16.0472
VCL	-0.2592	8.01096	-5.36629	9.89e-08	1.1e-06	7.29475		ZNF385D	-0.461863	4.69148	-8.42261	1.2e-16	1.33e-15	26.9864		KIAA0196	0.259911	7.77971	6.88969	9.61e-12	1.07e-10	16.0428
TMEM127	-0.14288	6.46743	-5.36485	9.96e-08	1.11e-06	7.28733		TSPAN7	-0.731968	6.30119	-8.41836	1.24e-16	1.38e-15	26.9531		NUDT15	0.316162	7.04286	6.88714	9.78e-12	1.09e-10	16.0261
MLLT10	0.145757	5.95632	5.36209	1.01e-07	1.13e-06	7.27315		FANCF	0.299427	5.87278	8.41433	1.28e-16	1.42e-15	26.9215		NOTCH1	-0.381917	6.79355	-6.88677	9.81e-12	1.09e-10	16.0237
ING1	0.152356	5.8436	5.36162	1.01e-07	1.13e-06	7.27073		SLITRK5	-0.566344	4.04098	-8.41271	1.29e-16	1.44e-15	26.9088		WDR6	-0.275531	7.49822	-6.88588	9.86e-12	1.1e-10	16.0179
HSPA9	0.169677	8.22924	5.36089	1.02e-07	1.13e-06	7.26696		PLA2G4C	-0.582399	6.02837	-8.41181	1.3e-16	1.45e-15	26.9017		HLA-G	0.441626	8.54383	6.88584	9.87e-12	1.1e-10	16.0176
CYFIP2	-0.325719	6.28316	-5.35943	1.03e-07	1.14e-06	7.25946		PEX10	0.246689	5.31356	8.41129	1.31e-16	1.45e-15	26.8977		MAN2A2	-0.258244	5.9094	-6.88477	9.94e-12	1.1e-10	16.0107
UBL3	-0.253764	8.10237	-5.35743	1.04e-07	1.15e-06	7.24919		RTKN2	0.362307	4.11006	8.41039	1.32e-16	1.46e-15	26.8906		SHC2	-0.278359	5.46628	-6.88382	1e-11	1.11e-10	16.0044
ABLIM3	-0.28437	5.44084	-5.35498	1.05e-07	1.17e-06	7.23658		STX12	-0.272834	7.49555	-8.40969	1.33e-16	1.47e-15	26.8852		BUB3	0.207578	8.06271	6.88279	1.01e-11	1.12e-10	15.9977
EMG1	0.195192	8.04878	5.35213	1.07e-07	1.18e-06	7.22193		NOC4L	0.292786	5.79615	8.40646	1.36e-16	1.51e-15	26.8599		NR1H2	-0.328786	6.54564	-6.88246	1.01e-11	1.12e-10	15.9956
GPHA2	0.234817	4.31563	5.3521	1.07e-07	1.18e-06	7.22175		ENTPD1	-0.447187	6.68463	-8.40642	1.36e-16	1.51e-15	26.8595		ZNF514	-0.303547	5.88982	-6.88233	1.01e-11	1.12e-10	15.9947
CCNK	0.149803	7.38831	5.35195	1.07e-07	1.18e-06	7.22098		RBBP9	0.268764	5.87381	8.40559	1.37e-16	1.52e-15	26.853		PPID	0.275583	6.2632	6.88226	1.01e-11	1.12e-10	15.9942
FBXO28	0.15214	7.03554	5.34886	1.09e-07	1.2e-06	7.20511		ANKRD50	-0.367514	6.40366	-8.40308	1.4e-16	1.55e-15	26.8334		TOX4	0.207784	6.05564	6.87866	1.04e-11	1.14e-10	15.9707
CD1C	-0.337669	5.30848	-5.34818	1.09e-07	1.2e-06	7.20165		PA2G4	0.365255	7.89876	8.40152	1.42e-16	1.56e-15	26.8211		TUG1	-0.255558	8.59479	-6.87859	1.04e-11	1.14e-10	15.9703
TFEC	0.225396	4.53355	5.34569	1.1e-07	1.22e-06	7.18886		TRMT11	0.273237	6.87329	8.39896	1.44e-16	1.6e-15	26.8011		TMEM86B	-0.385581	5.34821	-6.87483	1.06e-11	1.17e-10	15.9457
ADNP	0.170848	7.3751	5.34525	1.11e-07	1.22e-06	7.18662		FAM46A	-0.454573	7.96651	-8.39882	1.45e-16	1.6e-15	26.8		GPS1	-0.222884	7.02271	-6.87046	1.09e-11	1.21e-10	15.9172
FAM129A	-0.481843	7.4351	-5.34498	1.11e-07	1.22e-06	7.18523		TFRC	0.389379	8.74228	8.39707	1.47e-16	1.62e-15	26.7863		FLJ16734	-0.301681	4.80299	-6.86892	1.11e-11	1.22e-10	15.9071
KLF11	-0.224309	6.20348	-5.34454	1.11e-07	1.23e-06	7.18296		TEAD4	0.373522	6.23813	8.39471	1.49e-16	1.65e-15	26.7678		LAMB2	-0.437936	7.02581	-6.86719	1.12e-11	1.23e-10	15.8958
DCP1B	-0.170545	6.02161	-5.34382	1.12e-07	1.23e-06	7.17927		C8orf33	0.338153	7.07756	8.39445	1.5e-16	1.65e-15	26.7658		B2M	0.242075	10.594	6.86517	1.13e-11	1.25e-10	15.8826
APAF1	0.167986	6.12818	5.34243	1.12e-07	1.24e-06	7.1721		HMCN1	-0.643566	5.09135	-8.39221	1.52e-16	1.68e-15	26.7482		CUL5	0.23324	7.28405	6.86325	1.15e-11	1.26e-10	15.8702
ILF3	0.146191	7.13489	5.34133	1.13e-07	1.24e-06	7.16648		ASPA	-0.487532	4.39528	-8.39123	1.54e-16	1.69e-15	26.7406		NDUFS4	0.28763	7.7081	6.8625	1.15e-11	1.27e-10	15.8653
TMEM35	-0.421288	4.80717	-5.34037	1.14e-07	1.25e-06	7.16155		STK32B	-0.570348	4.74219	-8.39108	1.54e-16	1.69e-15	26.7394		ANP32A	0.32691	6.73334	6.86245	1.15e-11	1.27e-10	15.8649
LRRC46	0.162693	4.58653	5.33781	1.15e-07	1.27e-06	7.14843		IPO4	0.337549	6.34451	8.38941	1.56e-16	1.71e-15	26.7264		CISD2	0.262057	6.45716	6.86137	1.16e-11	1.28e-10	15.8579
CDH5	-0.305301	6.67639	-5.33754	1.15e-07	1.27e-06	7.14705		ANP32E	0.297567	6.2474	8.3881	1.57e-16	1.73e-15	26.7161		MAN2B1	-0.305609	6.96641	-6.86044	1.17e-11	1.28e-10	15.8518
ARRDC4	-0.299998	6.67123	-5.33749	1.15e-07	1.27e-06	7.14678		ZSWIM6	-0.311516	7.57951	-8.38783	1.58e-16	1.73e-15	26.714		ZNF226	0.269439	5.238	6.86001	1.17e-11	1.29e-10	15.849
MT2A	-0.390563	9.2984	-5.33669	1.16e-07	1.27e-06	7.14268		NDUFAB1	0.288862	9.85636	8.37551	1.74e-16	1.91e-15	26.6177		RBM34	0.440002	5.37623	6.85777	1.19e-11	1.3e-10	15.8344
FOXN4	0.145671	4.33513	5.33575	1.17e-07	1.28e-06	7.1379		RBMS1	-0.455464	7.17348	-8.37477	1.75e-16	1.92e-15	26.6119		ABCA7	-0.317743	5.35239	-6.8518	1.24e-11	1.36e-10	15.7955
ALG5	0.2164	7.44937	5.33259	1.19e-07	1.3e-06	7.12169		ITGA5	-0.614135	7.12667	-8.37284	1.78e-16	1.95e-15	26.5969		DDX1	0.184899	9.20571	6.85024	1.25e-11	1.37e-10	15.7854
UMPS	0.14335	5.573	5.33182	1.19e-07	1.3e-06	7.11777		MAGED1	-0.508731	8.49356	-8.37108	1.8e-16	1.97e-15	26.5831		KIAA1279	0.255562	7.08438	6.84695	1.28e-11	1.4e-10	15.764
STOM	-0.290745	7.91867	-5.33105	1.19e-07	1.31e-06	7.1138		IL11RA	-0.419957	5.62844	-8.36974	1.82e-16	1.99e-15	26.5727		MAMDC4	-0.434266	4.90865	-6.84515	1.3e-11	1.41e-10	15.7523
HOXD11	0.401466	4.22522	5.3308	1.2e-07	1.31e-06	7.11255		TMEM97	0.454857	8.30442	8.36841	1.84e-16	2.01e-15	26.5623		SLC30A4	-0.251677	4.7792	-6.84491	1.3e-11	1.42e-10	15.7507
NPDC1	-0.349491	6.46594	-5.33039	1.2e-07	1.31e-06	7.11043		RHOBTB1	-0.352636	5.59691	-8.3682	1.85e-16	2.01e-15	26.5607		DBN1	-0.433018	6.53059	-6.84343	1.31e-11	1.43e-10	15.7411
EPHA3	-0.367812	4.8859	-5.32647	1.22e-07	1.34e-06	7.09035		ISLR	-0.648669	6.09836	-8.36744	1.86e-16	2.02e-15	26.5547		TCEB2	-0.202959	8.89857	-6.84115	1.33e-11	1.45e-10	15.7263
FGF4	0.170866	4.4489	5.32581	1.23e-07	1.34e-06	7.08703		NKAP	0.26003	6.00397	8.36697	1.86e-16	2.03e-15	26.5511		GUCY1B2	-0.396443	4.00147	-6.84053	1.34e-11	1.45e-10	15.7222
TPRKB	0.185271	7.28957	5.32555	1.23e-07	1.34e-06	7.08565		CEBPD	-0.437476	8.52518	-8.36585	1.88e-16	2.05e-15	26.5423		PLXNB2	-0.296666	7.29689	-6.83931	1.35e-11	1.47e-10	15.7143
FZD1	-0.214668	5.46114	-5.3255	1.23e-07	1.34e-06	7.08544		DES	-1.29643	6.20288	-8.36533	1.89e-16	2.05e-15	26.5383		PLEKHM1	-0.212576	6.08797	-6.83563	1.38e-11	1.5e-10	15.6904
NUDT1	0.242372	6.67498	5.32232	1.25e-07	1.36e-06	7.06917		TAF4	0.298951	7.02124	8.36152	1.95e-16	2.12e-15	26.5085		HPRT1	0.260665	7.61968	6.83562	1.38e-11	1.5e-10	15.6903
SGSM3	-0.210055	6.10307	-5.32214	1.25e-07	1.36e-06	7.06822		DKK3	-0.533592	7.25961	-8.35844	1.99e-16	2.17e-15	26.4846		POFUT2	-0.182409	5.87537	-6.82855	1.45e-11	1.57e-10	15.6444
MKRN1	-0.147094	8.84988	-5.32118	1.26e-07	1.37e-06	7.06333		PSMD11	0.260066	6.68244	8.35252	2.09e-16	2.27e-15	26.4384		NAB1	0.27915	6.87211	6.82783	1.46e-11	1.58e-10	15.6398
PDAP1	0.2208	5.48889	5.32104	1.26e-07	1.37e-06	7.06263		NDFIP2	0.380612	7.96654	8.35159	2.11e-16	2.28e-15	26.4312		ZNF618	-0.311801	6.12542	-6.82232	1.51e-11	1.64e-10	15.604
ANTXR2	-0.350164	7.10415	-5.32033	1.27e-07	1.37e-06	7.059		NFXL1	0.305402	6.74949	8.35059	2.12e-16	2.3e-15	26.4233		PLVAP	-0.433619	7.05616	-6.82166	1.52e-11	1.64e-10	15.5997
FGF6	0.216789	4.81362	5.32	1.27e-07	1.37e-06	7.05729		DHCR7	0.535716	6.81968	8.35049	2.12e-16	2.3e-15	26.4226		STK25	-0.243597	7.06761	-6.82106	1.52e-11	1.65e-10	15.5959
MINA	0.127918	5.8449	5.31974	1.27e-07	1.37e-06	7.05595		PCBD1	0.356831	7.53733	8.34867	2.16e-16	2.33e-15	26.4084		GBF1	-0.226844	6.27441	-6.81801	1.55e-11	1.68e-10	15.5761
ROGDI	-0.190281	5.89158	-5.3188	1.28e-07	1.38e-06	7.05116		RPL8	0.193342	10.8491	8.34655	2.19e-16	2.37e-15	26.3919		UAP1L1	-0.395576	5.70838	-6.81777	1.56e-11	1.68e-10	15.5745
CPE	-0.531567	6.8931	-5.31442	1.31e-07	1.41e-06	7.02879		TSFM	0.303821	6.09816	8.34612	2.2e-16	2.38e-15	26.3885		TNIP2	-0.222736	6.3232	-6.8176	1.56e-11	1.68e-10	15.5735
FNBP1	-0.36374	7.34197	-5.31335	1.31e-07	1.42e-06	7.02336		ATE1	0.222775	5.30829	8.34598	2.2e-16	2.38e-15	26.3875		ASPH	0.335043	6.05237	6.81646	1.57e-11	1.69e-10	15.5661
TPM3	0.184225	6.64426	5.31269	1.32e-07	1.42e-06	7.01998		ING1	0.240261	5.8436	8.34497	2.22e-16	2.4e-15	26.3796		POLM	-0.387945	5.61886	-6.81248	1.61e-11	1.74e-10	15.5403
LDHA	0.183121	10.5972	5.31228	1.32e-07	1.42e-06	7.0179		FKBPL	0.296633	5.46222	8.34471	2.22e-16	2.4e-15	26.3776		FYB	0.481981	6.08317	6.81196	1.62e-11	1.74e-10	15.5369
GUF1	0.208957	6.01315	5.31222	1.32e-07	1.42e-06	7.01758		KCNAB1	-0.330041	4.63914	-8.34462	2.23e-16	2.4e-15	26.3769		LRCH3	-0.240437	5.38065	-6.81069	1.63e-11	1.76e-10	15.5287
CHAC2	0.286479	5.83	5.30938	1.34e-07	1.45e-06	7.00308		CTDSPL2	0.234814	5.93625	8.34406	2.24e-16	2.41e-15	26.3725		FBXO5	0.339835	6.34788	6.81022	1.64e-11	1.76e-10	15.5257
CTDSP2	-0.188297	8.18175	-5.306	1.37e-07	1.47e-06	6.98585		PSMB2	0.264304	7.95443	8.34282	2.26e-16	2.43e-15	26.3628		USP8	0.228091	7.04956	6.80576	1.69e-11	1.81e-10	15.4968
IFNG	0.456078	4.90351	5.30455	1.38e-07	1.48e-06	6.97847		PLEKHO1	-0.58168	6.85916	-8.34082	2.29e-16	2.47e-15	26.3473		EFHD2	-0.317287	8.72467	-6.80573	1.69e-11	1.81e-10	15.4966
PCDHB4	-0.251467	4.73752	-5.30226	1.39e-07	1.5e-06	6.96684		ANKRD6	-0.494426	5.25751	-8.33865	2.33e-16	2.51e-15	26.3304		SPRYD3	-0.300812	7.20756	-6.80376	1.71e-11	1.83e-10	15.4839
TMEM119	-0.45683	6.53338	-5.30199	1.4e-07	1.5e-06	6.96543		MAP7	0.515626	7.37066	8.33606	2.38e-16	2.56e-15	26.3103		AGA	0.342427	6.81839	6.80188	1.73e-11	1.85e-10	15.4717
TATDN1	0.221366	7.37835	5.30188	1.4e-07	1.5e-06	6.96487		MRPL4	0.295758	6.0671	8.33268	2.45e-16	2.63e-15	26.284		CACNA1H	-0.506569	5.53288	-6.80168	1.73e-11	1.86e-10	15.4704
TREM1	0.399521	5.13905	5.29987	1.41e-07	1.51e-06	6.95465		MTFMT	0.273168	6.08784	8.33014	2.5e-16	2.68e-15	26.2643		ZNF133	-0.26356	6.21322	-6.80092	1.74e-11	1.86e-10	15.4655
ROBO2	-0.273454	4.22609	-5.29685	1.43e-07	1.54e-06	6.93925		ABHD11	0.447845	5.8582	8.32637	2.57e-16	2.76e-15	26.2349		STUB1	-0.254068	8.17452	-6.7989	1.76e-11	1.89e-10	15.4524
ECM2	-0.360707	6.10303	-5.29641	1.44e-07	1.54e-06	6.93704		CCDC59	0.250215	8.34882	8.32558	2.59e-16	2.77e-15	26.2288		GUCA1C	-0.254185	4.0557	-6.79877	1.77e-11	1.89e-10	15.4516
IPO9	0.164137	6.21622	5.29452	1.45e-07	1.55e-06	6.92744		PXDN	-0.496539	6.97005	-8.32551	2.59e-16	2.77e-15	26.2282		PELI3	-0.30273	5.40582	-6.7987	1.77e-11	1.89e-10	15.4511
HOPX	-0.398559	6.28402	-5.29442	1.45e-07	1.55e-06	6.92691		POLR3G	0.262329	4.33487	8.3198	2.71e-16	2.9e-15	26.1839		ZNF341	-0.259378	5.26277	-6.79498	1.81e-11	1.93e-10	15.4271
KLK11	-0.72198	6.17098	-5.29057	1.48e-07	1.58e-06	6.90734		APTX	0.225309	6.55104	8.31867	2.73e-16	2.92e-15	26.1752		RCOR2	-0.444292	5.41428	-6.79426	1.82e-11	1.94e-10	15.4225
MRPL38	0.23613	6.70856	5.29056	1.48e-07	1.58e-06	6.90728		DHX37	0.294007	6.29073	8.31854	2.74e-16	2.92e-15	26.1741		TSPYL1	0.259469	7.18267	6.79418	1.82e-11	1.94e-10	15.4219
CTGF	-0.383126	9.38743	-5.28965	1.49e-07	1.59e-06	6.90266		PTGER3	-0.365521	4.52135	-8.31541	2.81e-16	2.99e-15	26.1498		IFT81	0.184048	5.24302	6.79356	1.83e-11	1.95e-10	15.418
SLC11A2	0.242022	7.54152	5.288	1.5e-07	1.6e-06	6.89426		GTF3C2	0.199065	7.44772	8.31477	2.82e-16	3.01e-15	26.1449		RASGEF1B	0.315604	4.20811	6.79222	1.84e-11	1.96e-10	15.4093
ARHGAP1	-0.195946	7.58174	-5.28683	1.51e-07	1.61e-06	6.88833		ALDH1A3	-0.630323	6.81734	-8.30979	2.93e-16	3.12e-15	26.1062		PLOD3	-0.341316	8.62568	-6.79009	1.87e-11	1.99e-10	15.3955
COQ3	0.20962	6.97287	5.28608	1.52e-07	1.62e-06	6.88454		ZDHHC20	0.292573	6.35305	8.30751	2.99e-16	3.18e-15	26.0886		PDE12	0.241342	6.35791	6.78993	1.87e-11	1.99e-10	15.3945
HMGA2	0.218001	4.21738	5.28531	1.53e-07	1.62e-06	6.88062		NUP133	0.228438	7.04929	8.30615	3.02e-16	3.21e-15	26.078		UCK1	-0.183716	5.72998	-6.78991	1.87e-11	1.99e-10	15.3944
RBCK1	0.205642	7.37141	5.28487	1.53e-07	1.63e-06	6.87838		UBA6	0.345336	6.50714	8.30553	3.03e-16	3.23e-15	26.0732		ADK	0.30235	6.45881	6.78937	1.88e-11	2e-10	15.3909
THBS4	-0.80797	6.97548	-5.28294	1.54e-07	1.64e-06	6.8686		PTGER2	-0.615857	5.81567	-8.30459	3.06e-16	3.25e-15	26.0659		IRF3	-0.27652	6.92127	-6.78898	1.88e-11	2e-10	15.3884
SORBS1	-0.448095	6.21072	-5.27896	1.58e-07	1.68e-06	6.84841		BACE1	-0.291864	5.57796	-8.30371	3.08e-16	3.27e-15	26.0591		ZNF222	0.270331	5.02075	6.78819	1.89e-11	2.01e-10	15.3832
MATR3	0.293228	6.6786	5.27873	1.58e-07	1.68e-06	6.84725		LSM2	0.266337	8.35323	8.30366	3.08e-16	3.27e-15	26.0587		MSH6	0.262107	7.40455	6.78545	1.93e-11	2.04e-10	15.3656
XAGE-4	0.142585	5.19334	5.27866	1.58e-07	1.68e-06	6.8469		ISCU	-0.295992	8.89805	-8.30277	3.1e-16	3.29e-15	26.0518		SMEK2	0.231299	7.22686	6.78507	1.93e-11	2.05e-10	15.3631
THNSL1	0.23386	5.64532	5.2779	1.59e-07	1.68e-06	6.84302		ATF1	0.278837	6.29603	8.30206	3.12e-16	3.3e-15	26.0463		YIPF4	0.284049	6.06275	6.78334	1.96e-11	2.07e-10	15.352
NCF2	0.309082	5.72717	5.27664	1.6e-07	1.69e-06	6.83665		YWHAB	0.233097	9.76893	8.30154	3.13e-16	3.31e-15	26.0423		URM1	-0.225908	7.56031	-6.78253	1.97e-11	2.08e-10	15.3468
HSPB8	-0.5131	6.11521	-5.27596	1.6e-07	1.7e-06	6.83319		PSMA2	0.253247	8.03383	8.30067	3.15e-16	3.33e-15	26.0355		NPTXR	-0.257214	4.78681	-6.7809	1.99e-11	2.1e-10	15.3362
RPS23	-0.227625	9.25237	-5.27589	1.6e-07	1.7e-06	6.83284		FAM101B	-0.325577	6.08716	-8.29962	3.18e-16	3.36e-15	26.0274		C14orf119	0.283933	6.78626	6.77983	2e-11	2.11e-10	15.3293
UROC1	0.189523	3.88596	5.27521	1.61e-07	1.7e-06	6.82937		UTP20	0.229524	5.68361	8.29677	3.25e-16	3.43e-15	26.0053		HRSP12	0.339946	6.73468	6.77884	2.02e-11	2.13e-10	15.323
DDX52	0.161123	6.29203	5.27449	1.62e-07	1.71e-06	6.82574		DUSP2	0.457333	5.74865	8.29664	3.25e-16	3.44e-15	26.0043		MMP12	1.08742	7.54478	6.77881	2.02e-11	2.13e-10	15.3228
EFNA4	0.230959	6.23284	5.27394	1.62e-07	1.71e-06	6.82295		GADD45GIP1	0.225859	5.15832	8.29629	3.26e-16	3.44e-15	26.0016		SAP30BP	-0.231859	6.31108	-6.77649	2.05e-11	2.16e-10	15.3078
EDNRA	-0.381887	6.57456	-5.27391	1.62e-07	1.71e-06	6.82278		PPP1R8	0.192553	6.83161	8.29411	3.32e-16	3.5e-15	25.9847		SCAP	-0.275204	7.76316	-6.77464	2.07e-11	2.18e-10	15.2959
GFM1	0.145615	7.4088	5.27339	1.63e-07	1.71e-06	6.82018		TOX	-0.594994	5.41304	-8.29115	3.4e-16	3.58e-15	25.9618		DLC1	-0.431127	5.7338	-6.77154	2.12e-11	2.23e-10	15.2759
HAO2	0.148971	4.05053	5.27142	1.64e-07	1.73e-06	6.81019		PDGFC	-0.533323	6.64718	-8.29091	3.4e-16	3.58e-15	25.9599		SUSD2	-0.466837	5.92315	-6.77122	2.12e-11	2.23e-10	15.2738
ARPC5	0.164501	8.67393	5.27115	1.64e-07	1.73e-06	6.8088		RAB9B	-0.662048	5.17115	-8.2879	3.49e-16	3.67e-15	25.9367		MAP3K4	-0.230032	6.99971	-6.77019	2.13e-11	2.24e-10	15.2672
PSMC6	0.17438	8.41264	5.27099	1.65e-07	1.73e-06	6.80801		CD99	-0.36951	8.13208	-8.28747	3.5e-16	3.68e-15	25.9333		CTNNBIP1	-0.285792	5.55552	-6.76993	2.14e-11	2.24e-10	15.2655
TMOD3	0.146392	5.74436	5.27036	1.65e-07	1.74e-06	6.80482		SLC25A40	0.351811	5.99815	8.28711	3.51e-16	3.69e-15	25.9305		REXO1	-0.299129	4.93506	-6.76949	2.14e-11	2.25e-10	15.2627
MINPP1	0.24376	6.64764	5.26653	1.69e-07	1.77e-06	6.7854		CDCA7	0.582687	7.69181	8.28643	3.53e-16	3.7e-15	25.9253		GTF2F2	0.28489	7.4882	6.76863	2.16e-11	2.26e-10	15.2572
PUS1	0.190268	6.90507	5.26313	1.72e-07	1.8e-06	6.76822		CEP72	0.46396	5.28963	8.28618	3.53e-16	3.71e-15	25.9233		CHMP7	-0.223042	6.34626	-6.76568	2.2e-11	2.3e-10	15.2382
FBXL19	0.206966	5.29373	5.26181	1.73e-07	1.81e-06	6.76156		NFS1	0.376725	6.05068	8.2861	3.54e-16	3.71e-15	25.9228		ENOPH1	0.230109	8.46847	6.763	2.24e-11	2.34e-10	15.221
RILPL1	-0.262886	6.41076	-5.26178	1.73e-07	1.81e-06	6.76138		GEM	-0.618494	7.24846	-8.28522	3.56e-16	3.73e-15	25.9159		CSAD	-0.283929	5.22447	-6.76299	2.24e-11	2.34e-10	15.2209
ZNF460	0.13062	4.44851	5.25922	1.75e-07	1.83e-06	6.74847		FAM110A	0.38692	5.9977	8.28361	3.61e-16	3.78e-15	25.9034		CLPTM1	-0.330203	7.52911	-6.76211	2.25e-11	2.35e-10	15.2152
PLSCR4	-0.379262	6.95583	-5.25826	1.76e-07	1.84e-06	6.74363		APOD	-1.22454	7.46602	-8.27825	3.76e-16	3.94e-15	25.862		COL6A2	-0.605996	7.02598	-6.76205	2.25e-11	2.35e-10	15.2148
BRWD3	0.147166	5.00917	5.25733	1.77e-07	1.85e-06	6.73891		GEMIN4	0.344467	7.17465	8.27067	3.99e-16	4.18e-15	25.8034		CCDC137	-0.251361	5.70941	-6.75795	2.31e-11	2.42e-10	15.1885
GLE1	0.180659	6.76557	5.2567	1.78e-07	1.86e-06	6.7357		TRNT1	0.272177	6.10685	8.26874	4.05e-16	4.24e-15	25.7886		FDX1	0.273048	6.42662	6.75748	2.32e-11	2.42e-10	15.1855
PLA2G4C	-0.359159	6.02837	-5.25592	1.78e-07	1.86e-06	6.73181		PAWR	0.324101	6.55415	8.26695	4.11e-16	4.29e-15	25.7747		HHATL	0.324626	3.97506	6.7555	2.35e-11	2.45e-10	15.1727
GMFB	0.160297	8.51723	5.25566	1.79e-07	1.86e-06	6.73048		ZNF593	0.334273	7.70191	8.26692	4.11e-16	4.29e-15	25.7745		C8orf59	0.267898	8.19053	6.74881	2.46e-11	2.56e-10	15.1298
SNRPG	0.126324	10.2783	5.25461	1.8e-07	1.87e-06	6.72516		HIATL1	0.24382	6.50737	8.26468	4.19e-16	4.36e-15	25.7572		ALKBH6	-0.255503	6.53421	-6.74832	2.47e-11	2.57e-10	15.1267
SHISA3	-0.508201	4.81953	-5.25452	1.8e-07	1.87e-06	6.72471		CTDSP2	-0.297122	8.18175	-8.26353	4.22e-16	4.4e-15	25.7483		RGL2	-0.284896	6.68702	-6.74814	2.47e-11	2.57e-10	15.1255
MAP3K10	0.14015	4.70271	5.25395	1.8e-07	1.88e-06	6.72186		RNASE1	-0.65105	7.23698	-8.2603	4.33e-16	4.51e-15	25.7234		MRPL41	-0.253863	7.42024	-6.74691	2.49e-11	2.59e-10	15.1176
CYP26A1	0.228373	4.2279	5.25302	1.81e-07	1.88e-06	6.71715		CACNA2D3	-0.488729	4.60647	-8.25842	4.4e-16	4.58e-15	25.7089		CD53	0.409384	6.14132	6.74615	2.5e-11	2.6e-10	15.1127
RRN3	0.182976	6.83914	5.24917	1.85e-07	1.92e-06	6.69773		TIMM13	0.37275	5.60341	8.25692	4.45e-16	4.63e-15	25.6974		SERINC1	0.293253	8.28405	6.74613	2.5e-11	2.6e-10	15.1126
SSPN	-0.389465	6.43495	-5.24868	1.85e-07	1.92e-06	6.69523		TMEM62	0.337421	6.88608	8.25658	4.46e-16	4.64e-15	25.6947		NOL9	-0.226142	5.88628	-6.74484	2.52e-11	2.62e-10	15.1043
ACYP1	0.214076	6.57554	5.24745	1.86e-07	1.94e-06	6.68903		CACNA1C	-0.429461	4.68911	-8.25482	4.52e-16	4.7e-15	25.6811		KIF11	0.461158	6.86308	6.74101	2.59e-11	2.68e-10	15.0797
ITGA5	-0.379848	7.12667	-5.24701	1.87e-07	1.94e-06	6.6868		HIST1H2AB	0.336343	4.49919	8.25358	4.57e-16	4.74e-15	25.6716		DBR1	0.348556	6.47842	6.73675	2.66e-11	2.76e-10	15.0524
USP10	0.172448	6.70276	5.2464	1.88e-07	1.94e-06	6.68374		STARD7	0.220683	8.83543	8.24951	4.72e-16	4.89e-15	25.6402		ANKRD9	-0.293524	6.80546	-6.73478	2.7e-11	2.79e-10	15.0398
CBX8	0.224829	4.9908	5.24635	1.88e-07	1.94e-06	6.68351		ZNF827	-0.442225	6.37899	-8.248	4.77e-16	4.95e-15	25.6286		YWHAQ	0.195627	10.2074	6.73311	2.73e-11	2.82e-10	15.0291
RSRC1	0.228064	6.29205	5.24489	1.89e-07	1.96e-06	6.67612		SCML1	0.469799	6.29538	8.24304	4.96e-16	5.14e-15	25.5904		RPL23A	0.250364	9.454	6.73293	2.73e-11	2.82e-10	15.028
CRLS1	0.214917	7.86149	5.24125	1.93e-07	1.99e-06	6.65777		SERBP1	0.226424	8.62802	8.24243	4.99e-16	5.16e-15	25.5857		EAF1	0.312056	6.5561	6.73013	2.78e-11	2.87e-10	15.01
DCLRE1A	0.227728	6.14567	5.23999	1.94e-07	2.01e-06	6.65143		AOC3	-0.76855	6.05974	-8.24236	4.99e-16	5.16e-15	25.5851		CYSLTR2	0.318247	4.35543	6.72843	2.81e-11	2.9e-10	14.9991
SLIT3	-0.347322	5.11991	-5.23758	1.96e-07	2.03e-06	6.63929		IDE	0.279061	6.85038	8.24165	5.02e-16	5.18e-15	25.5797		TTC21A	-0.300164	4.67351	-6.72428	2.89e-11	2.98e-10	14.9726
NLGN1	-0.331062	4.38116	-5.23595	1.98e-07	2.05e-06	6.63112		SCG2	-0.780154	5.26568	-8.24089	5.05e-16	5.21e-15	25.5738		LRSAM1	-0.193387	5.32291	-6.7234	2.91e-11	3e-10	14.9669
CPEB1	-0.201547	4.4376	-5.23262	2.02e-07	2.08e-06	6.61435		ZMAT1	-0.282928	4.19681	-8.23907	5.12e-16	5.28e-15	25.5598		OTUD5	-0.194825	5.7808	-6.71615	3.05e-11	3.14e-10	14.9206
ADK	0.20936	6.45881	5.23241	2.02e-07	2.08e-06	6.61329		MEOX2	-0.727195	4.4012	-8.23427	5.32e-16	5.48e-15	25.5228		ZBTB47	-0.267875	5.47008	-6.71496	3.07e-11	3.16e-10	14.913
VPS39	-0.145143	6.34412	-5.23112	2.03e-07	2.09e-06	6.6068		SVIL	-0.561883	7.12052	-8.23016	5.49e-16	5.66e-15	25.4912		PURG	-0.20332	4.3882	-6.71297	3.11e-11	3.2e-10	14.9002
DPP3	0.200556	6.96637	5.22931	2.05e-07	2.11e-06	6.59773		INTS7	0.308236	5.6559	8.22969	5.51e-16	5.67e-15	25.4876		CDK5RAP2	-0.249982	6.32274	-6.71244	3.12e-11	3.21e-10	14.8969
GNA12	-0.138185	6.58739	-5.22876	2.06e-07	2.12e-06	6.59496		C5orf22	0.287795	5.74104	8.2209	5.9e-16	6.07e-15	25.42		LANCL1	0.313464	7.71957	6.71243	3.12e-11	3.21e-10	14.8968
KCNK13	0.249108	4.10758	5.22796	2.07e-07	2.13e-06	6.59091		CEP76	0.329993	5.57295	8.21746	6.07e-16	6.24e-15	25.3936		UBE2W	0.19684	5.64223	6.7122	3.13e-11	3.21e-10	14.8954
PMS1	0.186405	5.29208	5.22583	2.09e-07	2.15e-06	6.5802		PDGFRL	-0.834851	5.80004	-8.21708	6.08e-16	6.25e-15	25.3907		DUSP12	0.248409	7.53356	6.71127	3.15e-11	3.23e-10	14.8894
EN2	0.334325	4.17756	5.22581	2.09e-07	2.15e-06	6.58014		PTDSS1	0.286179	8.51583	8.21702	6.09e-16	6.25e-15	25.3903		PKP2	0.474604	6.53551	6.71081	3.16e-11	3.24e-10	14.8865
RGS5	-0.394442	7.47524	-5.22484	2.1e-07	2.16e-06	6.57526		RHOQ	-0.395491	8.09578	-8.21446	6.21e-16	6.37e-15	25.3705		NDFIP2	0.335913	7.96654	6.70992	3.18e-11	3.25e-10	14.8808
WDR16	0.178735	4.04498	5.22465	2.1e-07	2.16e-06	6.57432		CD63	-0.294918	9.30132	-8.21173	6.34e-16	6.5e-15	25.3496		GPR1	-0.518765	5.74835	-6.70992	3.18e-11	3.25e-10	14.8808
PSMF1	0.155907	7.69688	5.22275	2.12e-07	2.18e-06	6.56477		ZCCHC3	0.277736	5.79364	8.2086	6.5e-16	6.66e-15	25.3256		CCDC58	0.464016	6.94878	6.70922	3.19e-11	3.27e-10	14.8763
SPG20	-0.24152	5.35806	-5.22141	2.14e-07	2.19e-06	6.55803		LEPRE1	-0.339468	6.51702	-8.20502	6.69e-16	6.85e-15	25.2981		CCDC9	-0.187754	5.32577	-6.70683	3.24e-11	3.32e-10	14.861
NTN1	-0.292845	4.98895	-5.22125	2.14e-07	2.19e-06	6.55723		PDHX	0.360044	7.66124	8.20367	6.76e-16	6.91e-15	25.2878		SLC25A5	0.259992	10.5779	6.70627	3.25e-11	3.32e-10	14.8575
GLTP	-0.149879	8.33907	-5.2174	2.19e-07	2.23e-06	6.53791		STOML2	0.293979	8.63053	8.2025	6.82e-16	6.97e-15	25.2788		PPIL1	0.328446	7.4709	6.70623	3.25e-11	3.32e-10	14.8572
ZNF791	-0.202271	6.78634	-5.21569	2.2e-07	2.25e-06	6.52935		STRBP	0.281871	6.61848	8.20246	6.82e-16	6.97e-15	25.2785		HOXC8	-0.414213	4.87153	-6.70371	3.31e-11	3.38e-10	14.8412
CDH6	-0.191179	4.74589	-5.2115	2.25e-07	2.3e-06	6.50834		CPSF6	0.223512	6.36804	8.20172	6.86e-16	7.01e-15	25.2728		RAVER1	-0.288024	6.35502	-6.70318	3.32e-11	3.39e-10	14.8378
VAMP2	-0.220763	6.16308	-5.21072	2.26e-07	2.31e-06	6.50443		SMS	0.330015	8.63207	8.20136	6.88e-16	7.02e-15	25.2701		PLEKHG3	-0.341433	5.96428	-6.70247	3.34e-11	3.4e-10	14.8332
PARP14	0.23636	6.59506	5.20992	2.27e-07	2.32e-06	6.50044		SLC1A5	0.447744	7.12864	8.1994	6.99e-16	7.12e-15	25.255		ITM2B	0.276319	9.94251	6.7017	3.35e-11	3.42e-10	14.8283
CD34	-0.288044	6.41309	-5.20948	2.28e-07	2.32e-06	6.4982		POPDC2	-0.766279	4.7974	-8.18501	7.82e-16	7.97e-15	25.1448		CHM	0.230139	6.11548	6.70119	3.36e-11	3.42e-10	14.8251
IPO4	0.20672	6.34451	5.20559	2.32e-07	2.37e-06	6.47873		DDX52	0.253325	6.29203	8.18481	7.83e-16	7.97e-15	25.1433		RANBP2	0.229019	6.41525	6.69929	3.41e-11	3.46e-10	14.8129
CCDC22	0.164392	5.6721	5.20404	2.34e-07	2.39e-06	6.47099		POLB	0.283598	7.03013	8.17938	8.17e-16	8.31e-15	25.1017		QSER1	0.197526	5.6871	6.69696	3.46e-11	3.52e-10	14.7981
SMTN	-0.467136	6.43716	-5.19987	2.4e-07	2.44e-06	6.45014		MINA	0.199201	5.8449	8.17628	8.37e-16	8.51e-15	25.078		MTMR9	-0.302372	6.50226	-6.69525	3.5e-11	3.55e-10	14.7872
MYLK	-0.519184	6.92261	-5.19562	2.45e-07	2.49e-06	6.4289		SHC1	-0.259877	7.86893	-8.17605	8.38e-16	8.52e-15	25.0763		MIDN	-0.264882	6.5003	-6.69199	3.57e-11	3.63e-10	14.7664
BCAN	0.126166	4.75292	5.19525	2.45e-07	2.49e-06	6.42703		CREB3L2	-0.31506	7.24697	-8.17275	8.6e-16	8.74e-15	25.051		PCDHGA9	0.295828	4.33124	6.69053	3.61e-11	3.66e-10	14.7571
CLN8	-0.146554	5.18722	-5.1934	2.48e-07	2.52e-06	6.41782		NCAPD2	0.40135	6.91622	8.17007	8.78e-16	8.92e-15	25.0305		HYMAI	-0.429003	4.19882	-6.6859	3.72e-11	3.77e-10	14.7277
PA2G4	0.222815	7.89876	5.19278	2.49e-07	2.52e-06	6.41469		HDGFRP3	-0.541703	5.78955	-8.16991	8.79e-16	8.92e-15	25.0293		UTP6	0.248515	7.03228	6.68406	3.76e-11	3.81e-10	14.7159
LZTS2	-0.165958	5.82779	-5.19241	2.49e-07	2.53e-06	6.41285		CCDC50	-0.322648	6.88867	-8.16918	8.84e-16	8.97e-15	25.0238		ACBD5	0.246818	6.19659	6.68232	3.81e-11	3.85e-10	14.7049
TK1	0.324118	7.31165	5.19211	2.5e-07	2.53e-06	6.41135		TTC26	0.322465	5.14486	8.16854	8.89e-16	9e-15	25.0189		NPHP3	-0.288874	5.74529	-6.68203	3.81e-11	3.86e-10	14.703
TMEM33	0.197685	6.73086	5.19041	2.52e-07	2.55e-06	6.40287		PDE1C	-0.264631	4.31213	-8.16305	9.28e-16	9.39e-15	24.9769		FBXO8	0.270716	7.14336	6.68058	3.85e-11	3.89e-10	14.6938
YWHAE	0.228603	7.09125	5.19007	2.52e-07	2.55e-06	6.40117		AGTR1	-0.676003	4.67001	-8.16294	9.28e-16	9.39e-15	24.9761		SSBP4	-0.233043	6.41853	-6.67884	3.9e-11	3.94e-10	14.6827
LMNB2	0.270283	7.51714	5.18969	2.53e-07	2.55e-06	6.39929		CNPY4	-0.228817	5.61474	-8.16246	9.32e-16	9.42e-15	24.9725		LTBP3	-0.374087	6.15432	-6.67488	4e-11	4.04e-10	14.6576
SIDT2	-0.23354	7.92644	-5.18951	2.53e-07	2.55e-06	6.39838		GPM6B	-0.648762	5.11556	-8.15348	9.99e-16	1.01e-14	24.9039		TRIM52	-0.298662	5.68026	-6.67353	4.03e-11	4.07e-10	14.649
ASMTL	-0.212462	6.48077	-5.18947	2.53e-07	2.55e-06	6.39816		DNAJC11	0.238844	5.82553	8.15333	1e-15	1.01e-14	24.9027		OLFML2A	-0.441048	6.55684	-6.67158	4.08e-11	4.12e-10	14.6366
KIAA0101	0.271421	9.00924	5.18939	2.53e-07	2.55e-06	6.39776		GNAI2	-0.376211	7.81082	-8.15126	1.02e-15	1.03e-14	24.887		N4BP2L1	0.287867	5.30506	6.67024	4.12e-11	4.15e-10	14.6281
SLC34A1	0.17445	4.37766	5.18706	2.56e-07	2.58e-06	6.38614		PHB	0.304909	8.03748	8.15085	1.02e-15	1.03e-14	24.8838		LIN37	-0.208795	5.42651	-6.67006	4.13e-11	4.15e-10	14.6269
SUSD2	-0.321313	5.92315	-5.18702	2.56e-07	2.58e-06	6.38597		SEPW1	-0.313659	9.08228	-8.14778	1.04e-15	1.05e-14	24.8604		CXorf56	0.256503	5.14633	6.66882	4.16e-11	4.18e-10	14.6191
TUSC1	-0.278306	6.67081	-5.1864	2.57e-07	2.59e-06	6.38284		ZMYND19	0.368082	7.08519	8.14228	1.09e-15	1.1e-14	24.8185		VPS54	0.217893	6.60176	6.6673	4.2e-11	4.22e-10	14.6094
SMARCC1	0.174942	7.79683	5.18591	2.58e-07	2.59e-06	6.38043		NID1	-0.411562	5.85412	-8.14218	1.09e-15	1.1e-14	24.8178		EPS8	0.358497	8.19847	6.6655	4.25e-11	4.27e-10	14.598
MITD1	0.166176	7.63749	5.1855	2.58e-07	2.6e-06	6.3784		FXYD1	-0.560258	5.33564	-8.14063	1.1e-15	1.11e-14	24.8059		KATNA1	0.226695	6.99305	6.66406	4.29e-11	4.31e-10	14.5889
CWF19L1	0.146314	7.16164	5.18377	2.61e-07	2.62e-06	6.36973		TTC9C	0.238254	5.50769	8.13958	1.11e-15	1.12e-14	24.798		COG7	-0.247733	6.08446	-6.66333	4.31e-11	4.32e-10	14.5842
KIF21A	0.253254	6.45094	5.18337	2.61e-07	2.62e-06	6.36777		SORCS2	-0.444416	4.79007	-8.13847	1.12e-15	1.13e-14	24.7895		FNBP4	-0.228292	7.06307	-6.66278	4.33e-11	4.34e-10	14.5807
DAP3	0.157395	7.93349	5.18256	2.62e-07	2.63e-06	6.36371		FBXL22	-0.789531	4.374	-8.13539	1.15e-15	1.15e-14	24.766		ELF1	0.273045	8.33694	6.66207	4.35e-11	4.35e-10	14.5762
CDK7	0.181022	7.5088	5.18246	2.62e-07	2.63e-06	6.36323		MAGOHB	0.259728	5.20923	8.13453	1.16e-15	1.16e-14	24.7595		EHF	0.663748	6.72231	6.66035	4.4e-11	4.4e-10	14.5653
EPRS	0.150124	8.61492	5.18243	2.62e-07	2.63e-06	6.36309		MRPL14	0.32637	8.4942	8.13067	1.19e-15	1.2e-14	24.7301		SPTY2D1	0.241316	6.43906	6.65952	4.42e-11	4.42e-10	14.5601
RAP2C	0.191387	7.17223	5.18028	2.65e-07	2.66e-06	6.35234		MRPS18C	0.27368	6.79227	8.12994	1.2e-15	1.2e-14	24.7245		ADPRH	0.32483	5.00646	6.65598	4.52e-11	4.52e-10	14.5376
ZBTB33	0.143742	7.43185	5.17653	2.71e-07	2.71e-06	6.33369		MOCS3	0.314578	5.17414	8.12912	1.21e-15	1.21e-14	24.7183		RPS15	-0.181535	9.25593	-6.65494	4.55e-11	4.55e-10	14.531
AHCY	0.238464	9.08894	5.17429	2.74e-07	2.74e-06	6.32253		PRND	-0.525434	4.76176	-8.12796	1.22e-15	1.22e-14	24.7095		PPP1R2	0.255257	7.19224	6.65379	4.59e-11	4.58e-10	14.5237
C9orf3	-0.260166	6.6308	-5.17396	2.74e-07	2.74e-06	6.32091		FBXW4	-0.25897	6.93863	-8.12533	1.24e-15	1.24e-14	24.6895		NUF2	0.49798	5.89865	6.6524	4.63e-11	4.62e-10	14.5149
MECP2	-0.14643	5.37346	-5.17241	2.77e-07	2.76e-06	6.31317		ATP11A	0.247391	4.96738	8.12446	1.25e-15	1.25e-14	24.6829		CMTM6	0.256633	7.72189	6.64928	4.72e-11	4.71e-10	14.4951
TRO	-0.248867	4.79623	-5.17143	2.78e-07	2.77e-06	6.30831		RPUSD2	0.262011	7.0085	8.12239	1.27e-15	1.27e-14	24.6672		HMGN4	0.242137	8.81273	6.64832	4.75e-11	4.74e-10	14.4891
PRKD3	0.169856	5.27939	5.17104	2.79e-07	2.78e-06	6.30635		MRPL18	0.264543	8.66959	8.11891	1.31e-15	1.3e-14	24.6407		ABCB9	-0.325988	5.25753	-6.64814	4.76e-11	4.74e-10	14.488
CASP5	0.340977	4.86675	5.1675	2.84e-07	2.83e-06	6.28875		GPC6	-0.494864	6.27303	-8.11716	1.33e-15	1.32e-14	24.6274		MTDH	0.291042	8.28087	6.64504	4.86e-11	4.83e-10	14.4683
SLC30A1	0.204807	6.43499	5.16692	2.85e-07	2.84e-06	6.28586		MITD1	0.263538	7.63749	8.11654	1.33e-15	1.33e-14	24.6227		COQ2	0.288037	6.9528	6.63928	5.04e-11	5.01e-10	14.4319
ZNHIT2	0.196278	5.43438	5.16569	2.86e-07	2.85e-06	6.27977		ITIH5	-0.490158	7.72425	-8.11448	1.35e-15	1.35e-14	24.607		MFSD1	0.278211	8.79863	6.63893	5.05e-11	5.02e-10	14.4296
SH2B1	-0.165419	6.04433	-5.16516	2.87e-07	2.86e-06	6.27713		KCTD12	-0.641553	7.76834	-8.11361	1.36e-15	1.35e-14	24.6005		EFEMP2	-0.49081	7.25352	-6.63768	5.1e-11	5.06e-10	14.4217
INMT	-0.456001	5.92311	-5.16458	2.88e-07	2.86e-06	6.27424		MRPS18B	0.262221	7.81583	8.1122	1.38e-15	1.37e-14	24.5898		FBXO22	0.213717	5.79459	6.6333	5.24e-11	5.2e-10	14.3941
PARP1	0.160263	8.56678	5.16452	2.88e-07	2.86e-06	6.27395		SGSM2	-0.35938	7.36255	-8.10707	1.43e-15	1.42e-14	24.5508		GZMA	0.622259	6.86059	6.62724	5.45e-11	5.41e-10	14.3558
SLC30A6	0.113239	5.56002	5.16444	2.88e-07	2.86e-06	6.27358		SCD	0.648541	8.04418	8.10397	1.47e-15	1.46e-14	24.5273		PPHLN1	0.163976	6.47991	6.62653	5.48e-11	5.43e-10	14.3513
BLMH	0.224607	6.645	5.16431	2.89e-07	2.86e-06	6.27293		DUSP12	0.272899	7.53356	8.09905	1.52e-15	1.51e-14	24.4899		GTF2I	0.333151	5.36851	6.62342	5.59e-11	5.54e-10	14.3317
WARS	0.397376	8.40316	5.1639	2.89e-07	2.87e-06	6.2709		ID3	-0.525984	7.90431	-8.09844	1.53e-15	1.52e-14	24.4854		MAP2K7	-0.184049	5.14356	-6.62228	5.63e-11	5.57e-10	14.3245
WDR74	0.205949	6.57263	5.16338	2.9e-07	2.87e-06	6.26832		GTF2E1	0.236014	6.75972	8.09793	1.54e-15	1.52e-14	24.4815		ZNF394	-0.44114	7.0123	-6.62181	5.65e-11	5.59e-10	14.3215
JAZF1	-0.273373	6.19889	-5.15957	2.96e-07	2.93e-06	6.24941		SCO1	0.355176	7.59603	8.0887	1.65e-15	1.64e-14	24.4115		SLC25A37	-0.379695	6.4022	-6.62048	5.7e-11	5.63e-10	14.3132
MRPL48	0.222648	7.38703	5.15912	2.96e-07	2.93e-06	6.24717		SLC27A1	-0.414029	6.48189	-8.08693	1.67e-15	1.66e-14	24.3981		GBP5	0.728763	6.27112	6.61939	5.74e-11	5.67e-10	14.3063
TACC3	0.298513	6.30881	5.15883	2.97e-07	2.94e-06	6.24569		PSMC6	0.270916	8.41264	8.08232	1.74e-15	1.72e-14	24.3632		SDF4	-0.259124	8.02841	-6.61904	5.75e-11	5.68e-10	14.3041
ZNF142	0.153783	6.2659	5.15814	2.98e-07	2.94e-06	6.24228		FAM76B	0.247345	5.85307	8.07632	1.82e-15	1.8e-14	24.3178		PLEKHA3	0.234063	6.04834	6.61642	5.85e-11	5.77e-10	14.2875
CASQ2	-0.586948	5.16381	-5.15753	2.99e-07	2.95e-06	6.23928		MRPL35	0.250342	7.07365	8.07533	1.83e-15	1.81e-14	24.3103		TMEM14C	0.212511	9.35403	6.61527	5.89e-11	5.81e-10	14.2803
GATA2	-0.152119	5.18731	-5.1575	2.99e-07	2.95e-06	6.23911		ITPKB	-0.436427	5.59412	-8.07499	1.84e-15	1.81e-14	24.3078		SAR1A	0.329012	7.43617	6.61384	5.95e-11	5.86e-10	14.2713
ANKRD6	-0.301811	5.25751	-5.15729	2.99e-07	2.95e-06	6.23808		ITM2A	-0.723797	7.45325	-8.0715	1.89e-15	1.86e-14	24.2813		CDK10	-0.297745	6.7008	-6.6131	5.98e-11	5.88e-10	14.2666
TRIM47	-0.259223	6.63269	-5.15539	3.02e-07	2.98e-06	6.22863		PDE5A	-0.474795	5.8296	-8.07099	1.89e-15	1.87e-14	24.2775		TBC1D24	-0.21948	5.2629	-6.61302	5.98e-11	5.88e-10	14.2661
CDC123	0.194906	8.10188	5.15449	3.04e-07	2.99e-06	6.22417		NR6A1	0.196246	4.47443	8.07098	1.89e-15	1.87e-14	24.2774		TGFB1I1	-0.536448	6.97898	-6.61259	6e-11	5.89e-10	14.2634
LGALS14	0.22809	4.32113	5.15423	3.04e-07	2.99e-06	6.22292		PPP2R3A	-0.457951	5.68612	-8.0706	1.9e-15	1.87e-14	24.2745		CLEC12A	0.311243	4.41664	6.61255	6e-11	5.89e-10	14.2632
RASGRP2	-0.236401	5.03534	-5.15372	3.05e-07	3e-06	6.22036		HINT3	0.284328	5.34758	8.06614	1.97e-15	1.93e-14	24.2408		MYO9B	-0.234183	6.30486	-6.61199	6.02e-11	5.91e-10	14.2596
LYL1	-0.2755	6.59527	-5.15335	3.05e-07	3e-06	6.21855		LEPREL2	-0.526445	5.46031	-8.0659	1.97e-15	1.94e-14	24.239		CRAT	-0.272232	5.80396	-6.61182	6.03e-11	5.91e-10	14.2586
C14orf142	0.222927	6.98698	5.15325	3.06e-07	3e-06	6.21804		TIMM50	0.228592	5.41796	8.06035	2.06e-15	2.02e-14	24.1971		VASN	-0.414792	6.67915	-6.61079	6.07e-11	5.95e-10	14.2521
ITGB3	-0.121397	4.36841	-5.15242	3.07e-07	3.01e-06	6.21392		TMEM35	-0.644209	4.80717	-8.05983	2.06e-15	2.03e-14	24.1932		MAPK11	-0.227269	4.69701	-6.61018	6.09e-11	5.97e-10	14.2482
PRPS2	0.227421	7.49996	5.152	3.08e-07	3.02e-06	6.21186		DNM3	-0.378345	4.81096	-8.05364	2.16e-15	2.12e-14	24.1465		KRR1	0.235336	5.53467	6.60781	6.19e-11	6.06e-10	14.2333
EIF2S2	0.178978	7.20231	5.14833	3.14e-07	3.07e-06	6.19368		PRPS2	0.360175	7.49996	8.05313	2.17e-15	2.13e-14	24.1426		LOC654342	-0.283622	4.58134	-6.607	6.22e-11	6.09e-10	14.2282
EFNA5	-0.191111	4.8496	-5.14562	3.18e-07	3.12e-06	6.18022		GNAI3	0.264014	7.28394	8.05296	2.18e-15	2.13e-14	24.1413		DEPDC1	0.428438	5.45295	6.60692	6.22e-11	6.09e-10	14.2277
MAPKBP1	-0.149417	5.22093	-5.14442	3.2e-07	3.13e-06	6.17429		MYO9A	-0.339893	6.2221	-8.05088	2.21e-15	2.17e-14	24.1256		HLA-DRB6	0.59018	6.89819	6.59935	6.54e-11	6.39e-10	14.1801
HMGB1	0.222354	8.21608	5.14427	3.2e-07	3.13e-06	6.17355		NOL10	0.257214	5.76539	8.04877	2.25e-15	2.2e-14	24.1098		SOAT1	0.314591	6.14933	6.59918	6.54e-11	6.39e-10	14.179
MAP6	-0.200819	4.59624	-5.14356	3.21e-07	3.14e-06	6.17005		MYCT1	-0.326998	5.08831	-8.04855	2.25e-15	2.2e-14	24.108		WNT9B	0.31032	4.00349	6.59818	6.59e-11	6.43e-10	14.1727
AFF3	-0.255931	4.31085	-5.14281	3.23e-07	3.15e-06	6.16634		PLCXD3	-0.616736	4.22307	-8.04828	2.26e-15	2.2e-14	24.106		ZMIZ2	-0.251884	6.30858	-6.59751	6.61e-11	6.45e-10	14.1685
PTTG1IP	-0.152258	9.63964	-5.14245	3.23e-07	3.16e-06	6.16455		COPS5	0.256277	9.03397	8.04779	2.26e-15	2.21e-14	24.1023		HELZ	-0.194411	6.65747	-6.59276	6.82e-11	6.65e-10	14.1386
GRHL3	0.371843	4.17159	5.14192	3.24e-07	3.16e-06	6.16195		MYH9	-0.259635	8.99992	-8.0468	2.28e-15	2.23e-14	24.0948		DYNC1LI2	-0.25349	8.63238	-6.59094	6.9e-11	6.72e-10	14.1272
MKNK2	-0.184712	8.14621	-5.14179	3.24e-07	3.16e-06	6.1613		WDR5	0.270396	6.28482	8.04488	2.32e-15	2.26e-14	24.0804		FKBP3	0.275629	7.18403	6.5908	6.91e-11	6.72e-10	14.1263
PHC1	-0.181138	5.8152	-5.14169	3.25e-07	3.16e-06	6.16081		C20orf27	0.372917	6.82332	8.04241	2.36e-15	2.3e-14	24.0618		CACNA1D	-0.253573	4.64347	-6.59032	6.93e-11	6.74e-10	14.1233
CCT4	0.141975	7.25269	5.14049	3.27e-07	3.18e-06	6.15487		NEDD1	0.230953	6.05633	8.04033	2.4e-15	2.34e-14	24.0461		LUC7L	-0.223316	6.04257	-6.58971	6.96e-11	6.76e-10	14.1195
ID3	-0.329499	7.90431	-5.14016	3.27e-07	3.18e-06	6.15323		NME5	-0.482385	5.07057	-8.03991	2.41e-15	2.34e-14	24.0429		KIF21A	0.35832	6.45094	6.58928	6.98e-11	6.78e-10	14.1168
ITGB5	-0.197926	7.39645	-5.1385	3.3e-07	3.21e-06	6.145		CFD	-0.849428	7.64673	-8.03945	2.41e-15	2.35e-14	24.0395		DERL1	0.213884	8.00046	6.58689	7.08e-11	6.88e-10	14.1018
ALG8	0.211137	7.52788	5.1358	3.35e-07	3.25e-06	6.13167		SUZ12	0.230155	7.99135	8.03647	2.47e-15	2.4e-14	24.017		MED22	-0.248263	6.64396	-6.58684	7.09e-11	6.88e-10	14.1014
DCTN2	-0.113685	7.86863	-5.13552	3.35e-07	3.26e-06	6.13027		EDNRB	-0.393242	5.7203	-8.03603	2.48e-15	2.41e-14	24.0137		NPR2	-0.256379	5.26833	-6.58534	7.16e-11	6.94e-10	14.092
MEF2D	-0.211054	6.32793	-5.13529	3.36e-07	3.26e-06	6.12917		CSGALNACT1	-0.490213	6.26129	-8.03593	2.48e-15	2.41e-14	24.013		CLIC4	0.430179	7.48925	6.58327	7.25e-11	7.03e-10	14.079
YY1	0.135025	8.02262	5.13517	3.36e-07	3.26e-06	6.12857		CHML	0.254469	4.9759	8.02566	2.68e-15	2.6e-14	23.9357		VPS35	0.221595	8.58522	6.58262	7.28e-11	7.05e-10	14.0749
WDFY1	0.171157	8.42159	5.13142	3.42e-07	3.32e-06	6.11005		PLEKHH2	-0.397789	4.77087	-8.02096	2.78e-15	2.7e-14	23.9003		CLK3	-0.207703	6.33497	-6.581	7.36e-11	7.12e-10	14.0648
TRIM67	0.185176	4.84284	5.13068	3.44e-07	3.33e-06	6.10641		LARP4	0.267095	6.51339	8.01983	2.81e-15	2.72e-14	23.8918		ARL5B	0.306419	6.40525	6.57903	7.45e-11	7.21e-10	14.0525
EVL	-0.298713	7.43808	-5.13001	3.45e-07	3.34e-06	6.10309		DAP3	0.246757	7.93349	8.01919	2.82e-15	2.73e-14	23.887		BCAT1	0.519069	6.03429	6.57802	7.5e-11	7.25e-10	14.0461
UBE2NL	0.173641	6.09704	5.12891	3.47e-07	3.36e-06	6.09766		CAD	0.278473	5.92461	8.01645	2.88e-15	2.79e-14	23.8664		MCCC2	0.305095	5.88844	6.57564	7.62e-11	7.36e-10	14.0312
C7orf55	-0.197685	6.80699	-5.1276	3.49e-07	3.38e-06	6.09119		VAMP2	-0.344083	6.16308	-8.01571	2.9e-15	2.8e-14	23.8609		ELMOD2	0.232039	5.99236	6.57531	7.63e-11	7.37e-10	14.0291
EXOC6	0.138297	5.87375	5.12675	3.51e-07	3.39e-06	6.087		MRPL32	0.227396	8.71196	8.01521	2.91e-15	2.81e-14	23.8571		GALNT11	-0.27508	7.50395	-6.57417	7.69e-11	7.42e-10	14.022
PRR3	0.197996	5.35877	5.12522	3.54e-07	3.41e-06	6.07943		SIM2	0.38319	4.79115	8.01495	2.91e-15	2.81e-14	23.8552		CAPZA1	0.389431	6.98206	6.57332	7.73e-11	7.46e-10	14.0166
TGIF2	0.206994	6.25908	5.12469	3.54e-07	3.42e-06	6.07683		NUP88	0.24071	7.51338	8.01017	3.02e-15	2.92e-14	23.8193		SMCHD1	0.221619	5.76732	6.5728	7.76e-11	7.48e-10	14.0134
C2CD2	-0.178287	7.18733	-5.12461	3.55e-07	3.42e-06	6.07644		PLCL2	-0.448528	6.1944	-8.00928	3.04e-15	2.93e-14	23.8126		ARMCX5	0.271996	6.17868	6.56929	7.94e-11	7.64e-10	13.9914
HOMER1	0.215383	5.67674	5.12421	3.55e-07	3.43e-06	6.07445		PAPOLA	0.227802	8.35	8.00924	3.04e-15	2.93e-14	23.8123		MAP3K7	0.189621	6.93658	6.56822	7.99e-11	7.69e-10	13.9847
PTPLAD1	0.192783	8.74022	5.12414	3.56e-07	3.43e-06	6.07411		PSMD10	0.277239	7.74256	8.00739	3.09e-15	2.97e-14	23.7984		RQCD1	0.263868	6.30413	6.56793	8.01e-11	7.7e-10	13.9829
PCDH17	-0.32425	7.2174	-5.12341	3.57e-07	3.44e-06	6.07054		RRP12	0.301334	5.76133	8.00414	3.17e-15	3.05e-14	23.774		FUNDC1	0.367657	7.39807	6.56748	8.03e-11	7.72e-10	13.9801
PSEN1	0.0991262	5.27953	5.12201	3.59e-07	3.46e-06	6.06361		BARD1	0.306186	6.71459	8.00318	3.19e-15	3.07e-14	23.7668		GPHA2	0.32052	4.31563	6.56388	8.22e-11	7.89e-10	13.9575
ITGAD	0.241912	4.46954	5.1218	3.6e-07	3.46e-06	6.0626		PCGF6	0.287021	6.22479	8.00292	3.2e-15	3.07e-14	23.7648		IRF4	0.304308	4.68184	6.56096	8.37e-11	8.04e-10	13.9392
SPECC1L	-0.187665	7.72814	-5.1215	3.6e-07	3.46e-06	6.06113		GNB1L	0.309299	5.41362	7.99933	3.28e-15	3.16e-14	23.7379		SPG7	-0.371585	4.9812	-6.55714	8.58e-11	8.23e-10	13.9154
CCT2	0.236273	9.06241	5.12103	3.61e-07	3.47e-06	6.0588		FBLN2	-0.821368	6.26189	-7.99696	3.34e-15	3.21e-14	23.7202		CLIP3	-0.633552	6.27905	-6.55588	8.65e-11	8.29e-10	13.9075
LAS1L	0.151386	6.38921	5.12084	3.62e-07	3.47e-06	6.05788		PDZRN4	-0.863994	4.57819	-7.99663	3.35e-15	3.22e-14	23.7177		PCGF2	-0.280889	6.40966	-6.55381	8.77e-11	8.4e-10	13.8945
ITGA10	-0.207824	5.07758	-5.12046	3.62e-07	3.48e-06	6.05599		PPM1M	-0.389622	6.48763	-7.99536	3.39e-15	3.25e-14	23.7081		TNRC6B	-0.243771	6.25277	-6.5536	8.78e-11	8.41e-10	13.8933
PIN1	-0.156109	7.90244	-5.1199	3.63e-07	3.48e-06	6.05323		CTGF	-0.58664	9.38743	-7.99399	3.42e-15	3.28e-14	23.6978		ZNF346	-0.177275	5.0287	-6.55331	8.8e-11	8.42e-10	13.8915
C20orf194	-0.214302	5.63703	-5.1176	3.68e-07	3.52e-06	6.04192		FAM122B	0.324991	7.35302	7.99356	3.43e-15	3.29e-14	23.6946		PRPS1	0.276283	7.33341	6.55214	8.86e-11	8.48e-10	13.8841
LIG1	0.230304	6.58284	5.11645	3.7e-07	3.54e-06	6.03622		HIST1H3B	0.377855	4.07785	7.98877	3.56e-15	3.41e-14	23.6587		VARS2	-0.316375	7.44881	-6.5497	9e-11	8.6e-10	13.8689
NR3C2	-0.362019	6.23022	-5.11481	3.73e-07	3.57e-06	6.02818		OCLN	0.422888	5.71821	7.9863	3.63e-15	3.47e-14	23.6402		TREM1	0.549503	5.13905	6.54948	9.02e-11	8.61e-10	13.8676
CTSG	-0.508183	5.48233	-5.11454	3.74e-07	3.57e-06	6.02684		HSP90AB1	0.315102	9.82311	7.98621	3.63e-15	3.47e-14	23.6395		PDE4B	0.392114	5.68764	6.54844	9.08e-11	8.66e-10	13.861
AAK1	-0.143361	5.15459	-5.11101	3.8e-07	3.64e-06	6.00947		MCAT	0.283198	6.20045	7.98341	3.71e-15	3.54e-14	23.6186		DTX3	-0.352112	5.16563	-6.54394	9.34e-11	8.91e-10	13.833
RAMP3	-0.277603	6.20361	-5.10995	3.83e-07	3.65e-06	6.00426		CEP152	0.234601	4.83277	7.98281	3.73e-15	3.56e-14	23.6141		ERAP1	0.226024	5.59256	6.54258	9.43e-11	8.98e-10	13.8245
EXOSC2	0.182384	6.05302	5.10959	3.83e-07	3.66e-06	6.00247		ACYP1	0.32994	6.57554	7.9822	3.74e-15	3.57e-14	23.6096		ZNF460	0.180744	4.44851	6.53861	9.67e-11	9.21e-10	13.7997
MEG3	-0.312984	5.17496	-5.10912	3.84e-07	3.66e-06	6.0002		TSC1	-0.245972	6.6101	-7.98208	3.75e-15	3.57e-14	23.6086		DONSON	0.30754	6.23923	6.5384	9.68e-11	9.22e-10	13.7984
C9orf41	0.13425	5.29442	5.10825	3.86e-07	3.68e-06	5.99588		ATP6V1C1	0.245235	6.51891	7.98076	3.79e-15	3.61e-14	23.5987		SPC25	0.468037	5.75856	6.53363	9.98e-11	9.5e-10	13.7686
SCYL2	0.158982	7.51037	5.10769	3.87e-07	3.69e-06	5.99317		GTPBP3	0.248634	6.16777	7.97999	3.81e-15	3.63e-14	23.593		USP5	-0.277399	7.14547	-6.53342	1e-10	9.5e-10	13.7673
LTBP1	-0.273182	6.05721	-5.10682	3.89e-07	3.7e-06	5.98889		ZFP64	0.184006	5.36991	7.97978	3.81e-15	3.63e-14	23.5914		SPNS1	-0.250433	7.30264	-6.53141	1.01e-10	9.62e-10	13.7548
COL6A3	-0.383662	9.74699	-5.10566	3.91e-07	3.72e-06	5.98318		SDC2	-0.446999	6.27293	-7.97968	3.82e-15	3.63e-14	23.5906		PHOSPHO2	0.30503	5.96888	6.52937	1.03e-10	9.74e-10	13.7421
C14orf159	-0.209589	6.82429	-5.10404	3.94e-07	3.75e-06	5.97523		LUM	-0.662772	8.99705	-7.9764	3.91e-15	3.72e-14	23.5661		PPWD1	0.214435	6.04276	6.52724	1.04e-10	9.87e-10	13.7289
HIRA	0.177047	5.41456	5.10385	3.95e-07	3.75e-06	5.97429		MMACHC	0.338738	6.03145	7.9734	4e-15	3.8e-14	23.5437		MDH1	0.213854	9.64723	6.52587	1.05e-10	9.95e-10	13.7203
CCL11	-0.456735	6.15617	-5.10335	3.96e-07	3.76e-06	5.97183		TLR5	-0.403748	6.07468	-7.97339	4e-15	3.8e-14	23.5436		TUBD1	0.275856	5.84334	6.52238	1.07e-10	1.02e-09	13.6986
FASTKD1	0.173974	7.10031	5.10304	3.96e-07	3.76e-06	5.97032		RILPL1	-0.403577	6.41076	-7.97259	4.03e-15	3.82e-14	23.5376		CREBL2	0.248655	6.22168	6.52229	1.07e-10	1.02e-09	13.698
SMYD2	0.169491	6.23573	5.10213	3.98e-07	3.78e-06	5.96583		NFIB	-0.481251	7.75921	-7.97062	4.09e-15	3.88e-14	23.5229		TOLLIP	-0.235964	5.99491	-6.52188	1.08e-10	1.02e-09	13.6955
CALCOCO1	-0.196591	6.21612	-5.10009	4.03e-07	3.81e-06	5.95584		SMAD9	-0.533088	5.27031	-7.97024	4.1e-15	3.89e-14	23.5201		ZNF41	0.179845	4.37476	6.52152	1.08e-10	1.02e-09	13.6933
GULP1	-0.291714	5.82999	-5.0984	4.06e-07	3.85e-06	5.94753		PGR	-0.369476	4.23623	-7.96987	4.11e-15	3.9e-14	23.5173		KIAA2013	-0.224263	7.23377	-6.51915	1.1e-10	1.04e-09	13.6785
FLJ36848	0.255176	4.47495	5.09751	4.08e-07	3.86e-06	5.94314		JAZF1	-0.427676	6.19889	-7.96673	4.21e-15	3.99e-14	23.4938		GMFB	0.221068	8.51723	6.51237	1.14e-10	1.08e-09	13.6363
AP1S2	-0.323591	7.40092	-5.09709	4.09e-07	3.87e-06	5.9411		C1QTNF3	-0.480118	5.00331	-7.96452	4.28e-15	4.05e-14	23.4773		OR7A17	0.366492	4.03822	6.51096	1.15e-10	1.09e-09	13.6276
MRTO4	0.215203	6.78225	5.09682	4.09e-07	3.87e-06	5.93979		CLNS1A	0.27702	8.26092	7.96269	4.35e-15	4.11e-14	23.4636		KCNAB3	-0.3478	4.20914	-6.50749	1.18e-10	1.11e-09	13.6061
GPM6B	-0.400226	5.11556	-5.09631	4.1e-07	3.88e-06	5.93724		OLFML2A	-0.479164	6.55684	-7.96202	4.37e-15	4.13e-14	23.4586		TMEM38B	0.360721	6.42732	6.5067	1.19e-10	1.12e-09	13.6012
RSPO3	-0.518344	6.82853	-5.09433	4.15e-07	3.91e-06	5.92757		MST4	0.397743	7.18599	7.96057	4.42e-15	4.17e-14	23.4478		PDHX	0.313662	7.66124	6.50607	1.19e-10	1.12e-09	13.5972
SGCA	-0.43031	4.50774	-5.09352	4.16e-07	3.93e-06	5.92359		HRSP12	0.363412	6.73468	7.96049	4.42e-15	4.17e-14	23.4472		CLC	0.581921	4.61093	6.50255	1.22e-10	1.15e-09	13.5754
ZDHHC20	0.177024	6.35305	5.09287	4.18e-07	3.94e-06	5.9204		C12orf5	0.361559	6.75249	7.96006	4.43e-15	4.18e-14	23.444		LZTS1	-0.287189	4.82265	-6.50221	1.22e-10	1.15e-09	13.5733
THY1	-0.372829	7.88823	-5.09236	4.19e-07	3.95e-06	5.91788		DLG2	-0.37022	4.22801	-7.95285	4.68e-15	4.41e-14	23.3902		MAST3	-0.279986	6.34809	-6.49962	1.24e-10	1.17e-09	13.5572
ARNTL2	0.216749	5.48155	5.09227	4.19e-07	3.95e-06	5.91744		THBS4	-1.23215	6.97548	-7.95153	4.73e-15	4.45e-14	23.3803		TLE3	-0.222607	5.73025	-6.49907	1.25e-10	1.17e-09	13.5538
WNT9B	0.215161	4.00349	5.09175	4.2e-07	3.95e-06	5.91489		DHODH	0.200818	4.65109	7.94967	4.8e-15	4.52e-14	23.3665		MNDA	0.461295	5.8355	6.49792	1.25e-10	1.18e-09	13.5467
CENPM	0.331657	6.43525	5.08915	4.26e-07	4.01e-06	5.90218		FANCM	0.239585	4.59842	7.94933	4.81e-15	4.52e-14	23.3639		SMA4	-0.274593	5.4777	-6.49728	1.26e-10	1.18e-09	13.5427
ZNF326	0.117471	5.14585	5.08888	4.26e-07	4.01e-06	5.90083		FHOD3	-0.622627	4.81221	-7.94381	5.02e-15	4.72e-14	23.3227		DEPDC5	-0.229696	5.13922	-6.49634	1.27e-10	1.19e-09	13.5369
PTGER2	-0.372448	5.81567	-5.08858	4.27e-07	4.01e-06	5.89936		SH3BGRL	-0.486833	8.26557	-7.94312	5.04e-15	4.74e-14	23.3176		LGR4	0.381881	5.78324	6.49376	1.29e-10	1.21e-09	13.5209
TNFRSF1A	-0.175128	8.20278	-5.08724	4.3e-07	4.04e-06	5.89284		CLSTN1	-0.298338	7.83987	-7.94297	5.05e-15	4.74e-14	23.3165		NFATC4	-0.212932	4.77644	-6.49262	1.3e-10	1.22e-09	13.5138
GCA	0.22857	7.58862	5.08303	4.39e-07	4.12e-06	5.87223		RNF6	0.178979	5.4549	7.94144	5.11e-15	4.79e-14	23.3051		ALG12	-0.232631	5.37135	-6.49243	1.3e-10	1.22e-09	13.5126
CDK2	0.175419	6.46703	5.08237	4.41e-07	4.13e-06	5.869		QSER1	0.213165	5.6871	7.93899	5.2e-15	4.88e-14	23.2868		LRRC8A	-0.282776	7.20241	-6.49208	1.3e-10	1.22e-09	13.5105
SLC7A6	0.188808	5.74211	5.0822	4.41e-07	4.14e-06	5.86813		FAM20A	-0.336734	4.6443	-7.9387	5.22e-15	4.89e-14	23.2847		JAK1	0.307472	7.36499	6.49087	1.31e-10	1.23e-09	13.503
PDCD2L	0.240803	6.81665	5.08126	4.43e-07	4.15e-06	5.86357		TIMM17B	0.280197	6.26218	7.93692	5.29e-15	4.95e-14	23.2714		CCDC82	0.203969	5.09389	6.49076	1.31e-10	1.23e-09	13.5023
ZNF620	0.224333	3.83121	5.08085	4.44e-07	4.16e-06	5.86153		DHRS3	-0.396009	7.92987	-7.93227	5.48e-15	5.13e-14	23.2368		TBC1D25	-0.13766	5.38205	-6.48787	1.34e-10	1.25e-09	13.4844
EVX1	0.170118	4.26349	5.08046	4.45e-07	4.16e-06	5.85962		SCLY	0.253901	5.40453	7.93089	5.53e-15	5.18e-14	23.2266		GTF2E1	0.207643	6.75972	6.48571	1.36e-10	1.27e-09	13.4711
GRIN3A	0.224577	3.93279	5.0802	4.46e-07	4.17e-06	5.85837		MYC	0.495172	8.03937	7.92485	5.79e-15	5.42e-14	23.1816		C1orf198	-0.327415	7.74892	-6.48513	1.36e-10	1.27e-09	13.4675
GNA14	-0.267074	4.97416	-5.07931	4.48e-07	4.18e-06	5.85401		SYTL2	-0.527687	7.42431	-7.92108	5.96e-15	5.57e-14	23.1536		ARFGEF1	0.23535	7.3363	6.48206	1.39e-10	1.29e-09	13.4484
KIAA1804	0.300521	6.04026	5.07761	4.52e-07	4.22e-06	5.84572		CD99L2	-0.34584	6.56448	-7.92059	5.99e-15	5.59e-14	23.1499		CRLS1	0.295786	7.86149	6.48116	1.4e-10	1.3e-09	13.4429
GGT5	-0.397597	5.32555	-5.07757	4.52e-07	4.22e-06	5.84551		DDX55	0.266407	6.79074	7.92005	6.01e-15	5.61e-14	23.1459		ZNF609	-0.228861	5.79034	-6.47856	1.42e-10	1.32e-09	13.4268
SPEF1	0.183195	4.80529	5.07673	4.54e-07	4.23e-06	5.84138		C1orf35	0.230515	6.40847	7.91897	6.06e-15	5.65e-14	23.1379		RAB24	-0.224939	6.62391	-6.47804	1.42e-10	1.33e-09	13.4236
SUMO1	0.182313	6.67997	5.07636	4.55e-07	4.24e-06	5.83958		CALCOCO1	-0.309238	6.21612	-7.91798	6.1e-15	5.69e-14	23.1305		D2HGDH	-0.440884	6.52694	-6.47735	1.43e-10	1.33e-09	13.4193
ENOPH1	0.155126	8.46847	5.07434	4.6e-07	4.28e-06	5.82971		SYNGR1	-0.276751	5.11983	-7.91791	6.11e-15	5.69e-14	23.1299		MFSD10	-0.257525	8.05505	-6.47661	1.44e-10	1.34e-09	13.4148
ZNF8	0.131531	4.86041	5.07428	4.6e-07	4.28e-06	5.82945		STRA13	0.327509	8.53563	7.91621	6.19e-15	5.76e-14	23.1173		FOXJ2	-0.209465	6.97102	-6.47337	1.47e-10	1.36e-09	13.3947
GHRL	-0.567856	5.07506	-5.07389	4.61e-07	4.28e-06	5.82755		C16orf13	0.232811	6.44959	7.91298	6.34e-15	5.9e-14	23.0933		ABT1	0.246328	6.1679	6.47197	1.48e-10	1.37e-09	13.3861
SLITRK5	-0.337108	4.04098	-5.07362	4.61e-07	4.29e-06	5.82621		NSUN2	0.297841	8.16667	7.91233	6.37e-15	5.92e-14	23.0885		MRPL11	0.226733	7.71814	6.47123	1.49e-10	1.38e-09	13.3815
GRK4	-0.14986	4.05809	-5.07351	4.61e-07	4.29e-06	5.8257		PGRMC2	-0.284257	8.46364	-7.90999	6.49e-15	6.02e-14	23.0711		TMEM91	-0.350598	5.50325	-6.47098	1.49e-10	1.38e-09	13.38
SSRP1	0.163808	6.93276	5.07161	4.66e-07	4.33e-06	5.8164		CPXM1	-0.698667	5.67242	-7.9032	6.83e-15	6.34e-14	23.0207		ZNRF2	0.230769	5.19131	6.46862	1.51e-10	1.4e-09	13.3654
SMEK1	0.100438	5.45553	5.0709	4.68e-07	4.34e-06	5.81291		MRPS2	0.287039	7.1728	7.90279	6.85e-15	6.36e-14	23.0176		DNM2	-0.299405	6.29529	-6.46849	1.51e-10	1.4e-09	13.3646
CCL18	0.434265	6.12843	5.07032	4.69e-07	4.35e-06	5.81009		ABLIM3	-0.425199	5.44084	-7.90267	6.86e-15	6.36e-14	23.0168		SLC25A35	-0.256221	5.1169	-6.46813	1.52e-10	1.4e-09	13.3624
STK16	0.120545	5.39283	5.06732	4.76e-07	4.41e-06	5.79546		FBXL5	-0.298918	7.19038	-7.89944	7.03e-15	6.51e-14	22.9928		CCT8	0.175293	8.56759	6.46751	1.52e-10	1.41e-09	13.3586
EFHD2	-0.212257	8.72467	-5.06726	4.77e-07	4.41e-06	5.79514		YME1L1	0.301234	7.13205	7.89919	7.04e-15	6.52e-14	22.991		ACACB	-0.425524	6.36444	-6.46648	1.53e-10	1.42e-09	13.3522
TWISTNB	0.160286	6.01089	5.06602	4.8e-07	4.44e-06	5.78914		ZEB2	-0.448286	5.73052	-7.89793	7.11e-15	6.58e-14	22.9817		PAK4	-0.245125	6.05874	-6.46626	1.54e-10	1.42e-09	13.3509
MEFV	0.224868	4.50612	5.06557	4.81e-07	4.44e-06	5.78695		ITGA8	-0.572175	5.21923	-7.89249	7.41e-15	6.85e-14	22.9413		THAP9	0.171492	4.59694	6.46558	1.54e-10	1.42e-09	13.3467
KARS	0.132806	8.59236	5.06556	4.81e-07	4.44e-06	5.78688		TSR1	0.253548	6.28746	7.89225	7.42e-15	6.85e-14	22.9395		MYOM1	-0.614775	5.40107	-6.4649	1.55e-10	1.43e-09	13.3425
GSPT2	-0.442813	6.33805	-5.06508	4.82e-07	4.45e-06	5.78454		RCL1	0.319563	6.05119	7.89224	7.42e-15	6.85e-14	22.9395		SETD3	-0.199605	7.44682	-6.46411	1.56e-10	1.44e-09	13.3376
TGFBR3	-0.416339	7.40008	-5.06446	4.83e-07	4.46e-06	5.7815		CPSF2	0.217497	6.74063	7.89144	7.46e-15	6.89e-14	22.9336		MRPL48	0.310449	7.38703	6.46336	1.56e-10	1.44e-09	13.333
HSPA2	-0.399209	6.43289	-5.06444	4.83e-07	4.46e-06	5.78141		NUP50	0.24929	5.98965	7.89119	7.48e-15	6.9e-14	22.9317		MS4A6A	0.497235	7.09981	6.46172	1.58e-10	1.46e-09	13.3228
MTFR1	0.217552	7.08477	5.06343	4.86e-07	4.48e-06	5.77649		EIF3E	0.200762	9.93852	7.88786	7.67e-15	7.07e-14	22.907		C17orf59	-0.247699	5.14511	-6.45552	1.64e-10	1.51e-09	13.2846
R3HDM1	0.161603	6.10185	5.06287	4.87e-07	4.49e-06	5.77375		LRFN4	0.447796	5.86464	7.88769	7.68e-15	7.08e-14	22.9057		DPY19L2	-0.359238	4.27049	-6.4554	1.65e-10	1.51e-09	13.2839
FGF2	-0.30735	4.93349	-5.06178	4.9e-07	4.51e-06	5.76843		PIGA	0.281185	6.61091	7.88747	7.69e-15	7.08e-14	22.9041		TNFSF10	0.487945	8.19236	6.45505	1.65e-10	1.52e-09	13.2817
C1orf127	0.211119	4.60424	5.06105	4.92e-07	4.53e-06	5.76487		GUF1	0.314187	6.01315	7.8834	7.93e-15	7.3e-14	22.874		TAF1B	0.228084	5.87173	6.45412	1.66e-10	1.52e-09	13.276
POT1	0.136153	5.83978	5.05995	4.95e-07	4.55e-06	5.75953		DISP1	-0.410905	5.94653	-7.88061	8.1e-15	7.45e-14	22.8533		MCEE	0.260061	7.30999	6.45295	1.67e-10	1.53e-09	13.2688
PDE1C	-0.16187	4.31213	-5.05907	4.97e-07	4.57e-06	5.75523		TXN	0.312992	9.71412	7.88013	8.13e-15	7.47e-14	22.8498		HSPA14	0.266601	7.10009	6.45265	1.67e-10	1.54e-09	13.2669
ABCC5	-0.220061	6.34978	-5.05621	5.04e-07	4.63e-06	5.74134		PDIA6	0.323489	8.46077	7.87714	8.32e-15	7.64e-14	22.8276		RBM39	-0.260909	7.5319	-6.45246	1.68e-10	1.54e-09	13.2658
FASN	0.272233	7.30048	5.05565	5.06e-07	4.64e-06	5.73859		EHMT2	0.206708	5.39801	7.87403	8.51e-15	7.82e-14	22.8047		DAGLB	-0.23242	6.39772	-6.45201	1.68e-10	1.54e-09	13.263
PARK2	-0.128283	3.94899	-5.0556	5.06e-07	4.64e-06	5.73834		CCL2	-0.697937	7.60724	-7.873	8.58e-15	7.87e-14	22.797		TPCN2	-0.285612	5.85978	-6.45131	1.69e-10	1.55e-09	13.2587
PIGM	0.205666	6.43108	5.05552	5.06e-07	4.64e-06	5.73794		HSD17B10	0.271197	7.69631	7.87186	8.66e-15	7.94e-14	22.7886		FAM98B	0.139882	5.62519	6.45043	1.7e-10	1.55e-09	13.2533
KCTD12	-0.394387	7.76834	-5.05357	5.11e-07	4.68e-06	5.72846		ZDHHC23	0.405357	5.90534	7.86938	8.82e-15	8.08e-14	22.7703		CLDND2	-0.42082	5.11695	-6.45043	1.7e-10	1.55e-09	13.2532
BVES	-0.257996	4.76781	-5.05074	5.19e-07	4.75e-06	5.71472		XKR4	-0.55622	4.05859	-7.86916	8.83e-15	8.09e-14	22.7686		LEPROTL1	0.258751	7.94229	6.4499	1.7e-10	1.56e-09	13.25
CCDC135	0.181631	4.02596	5.04848	5.25e-07	4.8e-06	5.70372		TAP2	0.376445	6.25787	7.86815	8.9e-15	8.15e-14	22.7612		PDLIM7	-0.313211	5.78099	-6.44676	1.74e-10	1.59e-09	13.2307
IARS2	0.169368	8.65495	5.04814	5.26e-07	4.81e-06	5.70206		SURF2	0.381373	5.488	7.86563	9.07e-15	8.3e-14	22.7425		MVP	-0.291973	8.26095	-6.44495	1.76e-10	1.6e-09	13.2195
RBM19	0.108027	4.98395	5.04594	5.31e-07	4.86e-06	5.69135		MRPL39	0.318217	6.39311	7.86079	9.41e-15	8.6e-14	22.7067		TMCC3	0.325913	5.67539	6.4449	1.76e-10	1.6e-09	13.2192
TSPYL4	-0.189693	6.31331	-5.0445	5.35e-07	4.89e-06	5.68437		EFTUD2	0.226783	7.68595	7.85999	9.47e-15	8.65e-14	22.7009		DTNB	-0.271071	4.47806	-6.44259	1.78e-10	1.63e-09	13.205
SNHG10	0.257557	3.97688	5.04354	5.38e-07	4.91e-06	5.67973		RGS4	-0.676659	5.61528	-7.85556	9.79e-15	8.94e-14	22.6681		MND1	0.432635	5.76424	6.44183	1.79e-10	1.63e-09	13.2003
DPY30	0.15892	8.39038	5.04284	5.4e-07	4.93e-06	5.6763		FZD1	-0.320813	5.46114	-7.85511	9.82e-15	8.96e-14	22.6648		ZMAT1	-0.242994	4.19681	-6.44174	1.79e-10	1.63e-09	13.1998
POLR2G	0.164357	8.6081	5.04222	5.42e-07	4.94e-06	5.67332		VPS39	-0.220819	6.34412	-7.85493	9.83e-15	8.97e-14	22.6635		EIF4G2	0.134642	8.76503	6.44131	1.8e-10	1.64e-09	13.1971
MORN3	0.251077	4.52694	5.04196	5.42e-07	4.94e-06	5.67204		USP28	0.190647	5.24306	7.85393	9.91e-15	9.03e-14	22.6561		ACTL6A	0.275098	8.34498	6.441	1.8e-10	1.64e-09	13.1952
POLG2	0.178459	5.6974	5.0411	5.45e-07	4.96e-06	5.66785		LYVE1	-0.614205	4.94967	-7.85341	9.95e-15	9.06e-14	22.6523		PODXL2	-0.623682	5.63923	-6.43771	1.84e-10	1.67e-09	13.175
UBE2D1	0.132978	5.32679	5.03895	5.51e-07	5.01e-06	5.65744		PTPN2	0.245145	5.71279	7.85328	9.96e-15	9.06e-14	22.6513		SH2D5	-0.312653	4.55841	-6.43739	1.84e-10	1.68e-09	13.173
GTF2H1	0.157306	6.36215	5.0371	5.56e-07	5.06e-06	5.64844		MKNK2	-0.285772	8.14621	-7.85139	1.01e-14	9.19e-14	22.6374		HEMK1	-0.230652	5.45641	-6.43717	1.85e-10	1.68e-09	13.1717
OLFM1	-0.332983	5.67096	-5.03669	5.57e-07	5.07e-06	5.64647		CPA3	-0.881896	6.85986	-7.85022	1.02e-14	9.26e-14	22.6287		JAK2	0.451958	6.02017	6.43691	1.85e-10	1.68e-09	13.17
MVP	-0.204989	8.26095	-5.03612	5.59e-07	5.08e-06	5.64372		C8orf59	0.283519	8.19053	7.84577	1.05e-14	9.57e-14	22.596		ELL2	0.334504	6.29384	6.43645	1.86e-10	1.68e-09	13.1672
MBD2	0.0988708	5.34412	5.03577	5.6e-07	5.08e-06	5.642		KCTD5	0.31332	6.87923	7.84379	1.07e-14	9.71e-14	22.5814		GSTCD	0.231822	5.76264	6.43503	1.87e-10	1.7e-09	13.1585
EIF3M	0.17869	7.95417	5.03575	5.6e-07	5.08e-06	5.64188		VCL	-0.383863	8.01096	-7.84372	1.07e-14	9.71e-14	22.5808		RABEP1	0.229317	6.91876	6.43338	1.89e-10	1.71e-09	13.1484
TMBIM4	-0.143024	9.42989	-5.03319	5.67e-07	5.14e-06	5.62949		PLXDC2	-0.525915	6.4198	-7.84369	1.07e-14	9.71e-14	22.5806		RMND1	0.231088	5.82895	6.43199	1.91e-10	1.73e-09	13.1398
TMEM55A	-0.341864	6.02119	-5.03253	5.69e-07	5.16e-06	5.62627		TMEM130	-0.504721	4.05686	-7.84071	1.09e-14	9.92e-14	22.5586		SORBS3	-0.257367	5.78123	-6.43024	1.93e-10	1.75e-09	13.1291
SYTL2	-0.330873	7.42431	-5.03226	5.7e-07	5.16e-06	5.62499		TOMM22	0.287669	7.45065	7.83894	1.11e-14	1e-13	22.5456		TCIRG1	-0.327809	6.96405	-6.42821	1.95e-10	1.77e-09	13.1166
ACADVL	-0.170114	8.70476	-5.03087	5.74e-07	5.2e-06	5.61823		HDGF	0.321998	8.94309	7.83679	1.13e-14	1.02e-13	22.5297		ST8SIA4	0.270802	5.07537	6.42756	1.96e-10	1.77e-09	13.1126
NKAP	0.154235	6.00397	5.02831	5.81e-07	5.26e-06	5.60583		RPL26L1	0.247982	7.95518	7.83598	1.13e-14	1.03e-13	22.5238		EVI5	-0.357119	6.75145	-6.42655	1.98e-10	1.78e-09	13.1065
COL5A1	-0.394361	8.02422	-5.02822	5.82e-07	5.26e-06	5.6054		KCNN3	-0.411522	4.68077	-7.8356	1.14e-14	1.03e-13	22.521		IL7	0.404461	5.66522	6.42636	1.98e-10	1.79e-09	13.1053
FHL5	-0.260684	4.55619	-5.02777	5.83e-07	5.27e-06	5.60324		ZNF362	-0.320947	6.412	-7.83379	1.15e-14	1.04e-13	22.5077		DCUN1D2	-0.232149	5.21866	-6.42541	1.99e-10	1.79e-09	13.0995
SUPT16H	0.1574	8.00876	5.0274	5.84e-07	5.28e-06	5.60143		PARG	0.218782	5.81209	7.83277	1.16e-14	1.05e-13	22.5002		ATP5S	0.232203	5.93512	6.42435	2e-10	1.81e-09	13.0929
CPSF2	0.136732	6.74063	5.02652	5.87e-07	5.3e-06	5.59717		SNRPA	0.234824	7.50472	7.83221	1.17e-14	1.05e-13	22.4961		PDIA3	0.207904	6.58565	6.42374	2.01e-10	1.81e-09	13.0892
EPHB2	0.318906	5.89628	5.02629	5.87e-07	5.3e-06	5.59605		FH	0.319168	8.36099	7.83075	1.18e-14	1.06e-13	22.4853		ACTR1B	-0.187168	7.35537	-6.42269	2.02e-10	1.82e-09	13.0828
C1R	-0.39684	7.46849	-5.02524	5.91e-07	5.32e-06	5.59101		RBM26	0.239067	5.87686	7.8281	1.2e-14	1.08e-13	22.4658		BANP	-0.202081	7.30882	-6.42245	2.03e-10	1.82e-09	13.0813
NFS1	0.225377	6.05068	5.0226	5.99e-07	5.39e-06	5.5782		CORO2B	-0.41717	4.1412	-7.82316	1.25e-14	1.13e-13	22.4295		SP3	0.217549	6.51211	6.42172	2.04e-10	1.83e-09	13.0768
SLC46A3	-0.318413	6.93233	-5.02259	5.99e-07	5.39e-06	5.57817		MAP6	-0.309384	4.59624	-7.82103	1.27e-14	1.14e-13	22.4138		HIAT1	0.235385	7.16566	6.42138	2.04e-10	1.83e-09	13.0747
RUVBL1	0.227129	6.85977	5.02083	6.04e-07	5.44e-06	5.56966		ATXN1	-0.322582	6.1639	-7.81927	1.29e-14	1.16e-13	22.4008		ZNF785	-0.228435	4.80714	-6.42093	2.05e-10	1.84e-09	13.072
ARL6IP6	0.215959	6.47416	5.02061	6.05e-07	5.44e-06	5.56857		IARS2	0.265764	8.65495	7.81813	1.3e-14	1.17e-13	22.3925		CPSF4	-0.242834	7.68636	-6.4203	2.06e-10	1.84e-09	13.0681
ZNF468	0.198245	6.22622	5.01974	6.07e-07	5.46e-06	5.56439		PPID	0.284929	6.2632	7.81647	1.31e-14	1.18e-13	22.3803		THSD4	-0.267771	4.70634	-6.41805	2.08e-10	1.87e-09	13.0543
CMBL	-0.501448	7.86797	-5.01834	6.12e-07	5.49e-06	5.55759		TIMM10	0.322419	8.02967	7.81489	1.33e-14	1.19e-13	22.3687		SLC25A23	-0.342896	7.36562	-6.41749	2.09e-10	1.88e-09	13.0509
XKR4	-0.350068	4.05859	-5.01795	6.13e-07	5.5e-06	5.55573		PPP3R1	0.317098	6.7686	7.81473	1.33e-14	1.19e-13	22.3675		DPH5	0.21188	6.85239	6.41741	2.09e-10	1.88e-09	13.0504
PARS2	0.163457	5.39636	5.01722	6.15e-07	5.52e-06	5.5522		COL3A1	-0.561855	10.027	-7.8124	1.35e-14	1.21e-13	22.3504		ATP6V0C	-0.201939	8.79715	-6.41463	2.13e-10	1.91e-09	13.0333
PLA2G2A	0.868536	7.08453	5.01697	6.16e-07	5.52e-06	5.55101		TPP2	0.203005	5.96289	7.81159	1.36e-14	1.22e-13	22.3445		UBE2J1	0.257751	7.70278	6.41417	2.14e-10	1.91e-09	13.0305
RRS1	0.207263	7.53252	5.01598	6.19e-07	5.55e-06	5.5462		MGAT1	-0.257774	7.96272	-7.80848	1.39e-14	1.25e-13	22.3216		ANKDD1A	-0.363651	5.45162	-6.41373	2.14e-10	1.92e-09	13.0278
CBLB	-0.177248	6.94536	-5.01572	6.2e-07	5.55e-06	5.54494		HOXA4	-0.55252	5.44527	-7.80417	1.44e-14	1.29e-13	22.29		SETD6	0.325497	5.20141	6.4136	2.14e-10	1.92e-09	13.027
PIP5K1A	0.145749	5.43945	5.01537	6.21e-07	5.56e-06	5.54326		KIAA0355	-0.336239	7.33443	-7.80356	1.45e-14	1.29e-13	22.2855		CDC42	0.233007	6.89355	6.41254	2.16e-10	1.93e-09	13.0205
ARL2BP	-0.147975	7.93201	-5.0138	6.26e-07	5.6e-06	5.53568		BATF2	0.55432	6.11024	7.80339	1.45e-14	1.3e-13	22.2842		RRBP1	-0.303393	7.89227	-6.41241	2.16e-10	1.93e-09	13.0197
SLC25A10	0.266418	6.35635	5.01329	6.28e-07	5.61e-06	5.5332		GRK5	-0.35449	6.67298	-7.80117	1.47e-14	1.32e-13	22.268		ABCF3	-0.218565	6.15469	-6.41197	2.17e-10	1.93e-09	13.0171
YTHDF3	0.147792	7.34014	5.01175	6.33e-07	5.65e-06	5.52579		BVES	-0.40358	4.76781	-7.79794	1.51e-14	1.35e-13	22.2443		GRB10	-0.257332	6.03366	-6.41036	2.19e-10	1.95e-09	13.0072
ANXA9	0.396208	5.0247	5.01158	6.33e-07	5.65e-06	5.52498		CCDC51	0.321218	6.72953	7.79732	1.52e-14	1.35e-13	22.2397		SCAND1	-0.274103	7.71623	-6.40825	2.22e-10	1.98e-09	12.9943
ANKS1B	-0.18657	3.89787	-5.01078	6.36e-07	5.67e-06	5.52112		CCDC77	0.362766	6.10916	7.7963	1.53e-14	1.36e-13	22.2322		EMILIN1	-0.587871	6.52352	-6.4076	2.23e-10	1.98e-09	12.9903
MT1M	-0.664696	5.82358	-5.00939	6.4e-07	5.71e-06	5.51437		VEGFC	-0.425337	5.84669	-7.79474	1.55e-14	1.38e-13	22.2208		IFT52	0.246884	6.28282	6.40737	2.23e-10	1.99e-09	12.9889
ZNF491	-0.146918	4.04929	-5.00899	6.41e-07	5.72e-06	5.51247		GAS1	-0.795461	6.03079	-7.79285	1.57e-14	1.4e-13	22.2069		AZI2	0.224661	6.23004	6.40712	2.23e-10	1.99e-09	12.9874
CXCL10	0.581995	7.95354	5.00629	6.5e-07	5.79e-06	5.49944		L2HGDH	0.317378	5.66849	7.7925	1.57e-14	1.4e-13	22.2044		ZNF691	-0.226041	5.33044	-6.40559	2.26e-10	2.01e-09	12.978
TTC30B	0.203672	5.1697	5.00389	6.58e-07	5.86e-06	5.48788		MPHOSPH10	0.216894	7.30643	7.79234	1.57e-14	1.4e-13	22.2032		NBPF20	-0.44753	7.14891	-6.40484	2.27e-10	2.01e-09	12.9734
PAFAH1B3	0.268837	7.5216	5.00284	6.62e-07	5.89e-06	5.48279		FMO2	-0.644418	5.82065	-7.79103	1.59e-14	1.41e-13	22.1936		FBXO18	-0.19516	6.69008	-6.40444	2.27e-10	2.02e-09	12.971
EMCN	-0.301392	5.86276	-5.00163	6.66e-07	5.92e-06	5.47696		TMEM180	0.396418	5.50428	7.78752	1.63e-14	1.45e-13	22.1679		ZNF512B	-0.400924	5.42749	-6.40428	2.27e-10	2.02e-09	12.97
PIGW	0.201406	5.87363	5.00029	6.7e-07	5.96e-06	5.4705		MRPL17	0.252845	8.31016	7.78434	1.67e-14	1.48e-13	22.1446		BAIAP2	-0.2833	5.26306	-6.40095	2.32e-10	2.06e-09	12.9496
PABPC5	-0.298142	3.79248	-4.99966	6.73e-07	5.97e-06	5.46749		CLCN2	0.290717	5.18414	7.78229	1.7e-14	1.51e-13	22.1296		RRAS	-0.396452	8.04576	-6.39938	2.35e-10	2.08e-09	12.94
GTSE1	0.234523	5.86054	4.99836	6.77e-07	6.01e-06	5.4612		SGCA	-0.66607	4.50774	-7.7815	1.71e-14	1.51e-13	22.1238		LIN7B	-0.240592	5.44382	-6.39838	2.36e-10	2.09e-09	12.9339
TAF5L	0.117383	5.47926	4.99794	6.78e-07	6.02e-06	5.45922		PHF19	0.280156	6.18532	7.78079	1.72e-14	1.52e-13	22.1186		MIER2	-0.210921	5.30761	-6.39669	2.39e-10	2.11e-09	12.9236
MYC	0.308101	8.03937	4.99598	6.85e-07	6.07e-06	5.44977		NPAS3	-0.202062	4.07658	-7.78034	1.72e-14	1.53e-13	22.1153		RFC2	0.260197	6.08967	6.3956	2.4e-10	2.13e-09	12.9169
CCT5	0.214452	7.18677	4.99494	6.89e-07	6.1e-06	5.44476		NXN	-0.54293	7.30804	-7.77685	1.77e-14	1.57e-13	22.0898		TBCEL	0.246221	5.03574	6.39522	2.41e-10	2.13e-09	12.9146
DGKH	0.168506	5.19693	4.99474	6.89e-07	6.11e-06	5.44379		CAPN10	0.285688	4.82108	7.77158	1.84e-14	1.63e-13	22.0513		NPEPPS	0.205844	6.7651	6.39326	2.44e-10	2.15e-09	12.9026
SLC38A6	0.214483	6.66128	4.99398	6.92e-07	6.13e-06	5.44012		ACOT7	0.345207	7.11422	7.77058	1.85e-14	1.64e-13	22.044		MTO1	0.195191	6.51903	6.39231	2.45e-10	2.17e-09	12.8968
CKB	-0.482466	7.08362	-4.99294	6.96e-07	6.15e-06	5.43512		PRPF6	0.289401	6.23088	7.76937	1.87e-14	1.65e-13	22.0351		PALM	-0.422686	5.88398	-6.39208	2.46e-10	2.17e-09	12.8954
TRIM11	0.167617	5.94714	4.99192	6.99e-07	6.18e-06	5.43021		GRHL3	0.569241	4.17159	7.76906	1.87e-14	1.65e-13	22.0329		CTSO	0.431441	7.25746	6.39168	2.46e-10	2.17e-09	12.893
RNF180	-0.23529	4.26142	-4.99146	7.01e-07	6.19e-06	5.42802		CCNJ	0.257721	5.05885	7.76906	1.87e-14	1.65e-13	22.0329		PIP5KL1	-0.272277	4.43565	-6.39071	2.48e-10	2.18e-09	12.8871
ENTPD1	-0.2619	6.68463	-4.98827	7.12e-07	6.29e-06	5.41268		PCID2	0.264246	8.17339	7.76582	1.92e-14	1.69e-13	22.0092		PLD2	-0.218271	5.88419	-6.3905	2.48e-10	2.19e-09	12.8858
DLEU2L	0.254381	3.6618	4.98668	7.18e-07	6.33e-06	5.40505		CPEB1	-0.303023	4.4376	-7.76474	1.93e-14	1.71e-13	22.0013		BRIP1	0.292814	4.81929	6.38955	2.49e-10	2.2e-09	12.88
PEAR1	-0.207678	5.2089	-4.98668	7.18e-07	6.33e-06	5.40504		CLDN11	-0.600461	5.19148	-7.76404	1.94e-14	1.71e-13	21.9962		DLST	-0.230622	7.30238	-6.38931	2.5e-10	2.2e-09	12.8785
ZNF521	-0.333494	5.57713	-4.98525	7.23e-07	6.38e-06	5.39818		HHIP	-0.490118	4.39208	-7.7623	1.97e-14	1.74e-13	21.9834		ITPR3	-0.360889	8.12507	-6.38869	2.51e-10	2.21e-09	12.8747
SOX18	-0.327746	6.13885	-4.98094	7.39e-07	6.51e-06	5.37749		DNMT3B	0.378235	5.37273	7.75995	2e-14	1.77e-13	21.9663		AP3B1	0.179158	7.74573	6.38807	2.52e-10	2.21e-09	12.871
SCG5	-0.442781	6.55813	-4.97944	7.45e-07	6.56e-06	5.37028		GNAQ	-0.350955	6.65951	-7.75335	2.11e-14	1.85e-13	21.9182		MXD3	-0.337916	5.72529	-6.38653	2.54e-10	2.23e-09	12.8615
SPEF2	0.179762	4.45175	4.97921	7.46e-07	6.56e-06	5.36916		PTPN13	-0.330292	4.70023	-7.74752	2.2e-14	1.93e-13	21.8757		EDC4	-0.230469	7.30017	-6.38648	2.54e-10	2.23e-09	12.8612
TEC	0.200647	4.33295	4.97866	7.48e-07	6.58e-06	5.36654		NFASC	-0.368051	4.63772	-7.74595	2.22e-14	1.96e-13	21.8641		SLC25A1	-0.331425	7.13724	-6.38253	2.61e-10	2.29e-09	12.8372
SPTY2D1	0.16208	6.43906	4.97822	7.5e-07	6.59e-06	5.36443		TRUB2	0.238433	6.40194	7.74465	2.25e-14	1.97e-13	21.8547		EXOC5	0.179762	5.96405	6.38111	2.63e-10	2.31e-09	12.8285
ATE1	0.131119	5.30829	4.97703	7.54e-07	6.62e-06	5.35873		LSM4	0.310925	7.93808	7.74459	2.25e-14	1.97e-13	21.8543		TOP1P2	0.328688	4.94948	6.38002	2.65e-10	2.32e-09	12.8218
LAYN	-0.30033	5.20316	-4.97683	7.55e-07	6.63e-06	5.35776		GATC	0.274958	6.1936	7.74386	2.26e-14	1.98e-13	21.8489		TP53INP2	-0.329448	7.04111	-6.37995	2.65e-10	2.32e-09	12.8214
PGM3	0.215023	6.6245	4.9765	7.56e-07	6.63e-06	5.35618		RFTN1	-0.434148	7.45499	-7.74322	2.27e-14	1.99e-13	21.8443		HSPA12A	-0.329803	4.96887	-6.37853	2.67e-10	2.34e-09	12.8127
ZNF135	-0.223533	4.74032	-4.97649	7.56e-07	6.63e-06	5.35613		CRELD1	-0.287376	6.12433	-7.74264	2.28e-14	2e-13	21.84		CD84	0.294276	5.30929	6.37783	2.69e-10	2.35e-09	12.8085
PHLDB2	-0.304613	5.4236	-4.97536	7.6e-07	6.66e-06	5.35074		ACVR1	-0.27838	8.07248	-7.74213	2.29e-14	2.01e-13	21.8363		CSTF2T	0.247742	6.31182	6.3772	2.7e-10	2.36e-09	12.8047
GABBR1	-0.1958	5.19918	-4.97421	7.65e-07	6.7e-06	5.34519		DPEP2	-0.587508	4.84401	-7.74161	2.3e-14	2.01e-13	21.8326		PTGIR	-0.227155	4.92047	-6.36993	2.82e-10	2.47e-09	12.7604
KIAA1191	-0.130105	8.39037	-4.97379	7.66e-07	6.71e-06	5.3432		E2F6	0.283523	7.03503	7.74097	2.31e-14	2.02e-13	21.8279		SUPT6H	-0.196283	5.8457	-6.36967	2.83e-10	2.47e-09	12.7588
RAB31	-0.351803	8.76347	-4.97354	7.67e-07	6.71e-06	5.34198		DNAJC18	-0.265275	5.08884	-7.74078	2.31e-14	2.02e-13	21.8265		EEF2	-0.187344	10.6475	-6.36929	2.83e-10	2.47e-09	12.7565
FARSA	0.160307	6.55784	4.97277	7.7e-07	6.73e-06	5.33831		BTG1	-0.289441	9.05244	-7.73872	2.35e-14	2.05e-13	21.8115		PTBP1	-0.160882	8.56689	-6.36865	2.85e-10	2.48e-09	12.7526
PTGER1	-0.322414	5.39128	-4.97254	7.71e-07	6.74e-06	5.33722		HEATR2	0.302115	6.83291	7.73737	2.37e-14	2.07e-13	21.8017		ABCF1	-0.203659	8.17258	-6.36603	2.89e-10	2.52e-09	12.7366
LIPC	0.511941	4.26523	4.97198	7.73e-07	6.75e-06	5.33452		AP1S2	-0.497566	7.40092	-7.73541	2.41e-14	2.1e-13	21.7874		CC2D1B	-0.181845	5.47859	-6.36286	2.95e-10	2.57e-09	12.7174
NOV	-0.34428	5.39376	-4.96953	7.83e-07	6.83e-06	5.32278		GMCL1	0.332086	6.87867	7.73173	2.47e-14	2.16e-13	21.7606		RAP1B	0.273481	8.00087	6.36229	2.96e-10	2.58e-09	12.7139
MRPL45	0.179376	7.37307	4.9685	7.87e-07	6.86e-06	5.31788		NUP153	0.272849	6.66059	7.72901	2.52e-14	2.2e-13	21.7408		PHF13	-0.232436	7.45226	-6.35816	3.04e-10	2.65e-09	12.6888
IFIH1	0.244886	6.42246	4.96429	8.04e-07	7.01e-06	5.2977		TSC22D3	-0.414798	6.8355	-7.7285	2.53e-14	2.21e-13	21.7371		ORAI2	-0.199347	5.17472	-6.35656	3.07e-10	2.67e-09	12.6791
NPM3	0.241777	7.21927	4.96315	8.09e-07	7.04e-06	5.29223		DYNC1LI2	-0.270395	8.63238	-7.72292	2.64e-14	2.3e-13	21.6965		GTF3C5	-0.269542	6.77156	-6.3533	3.13e-10	2.72e-09	12.6593
CLEC4E	0.186615	4.65924	4.96226	8.12e-07	7.07e-06	5.28799		TUBGCP4	0.257604	6.27975	7.72089	2.68e-14	2.33e-13	21.6818		WAC	0.176841	7.88204	6.34897	3.22e-10	2.8e-09	12.633
CPLX2	0.203715	4.26511	4.96133	8.16e-07	7.1e-06	5.28357		SOX18	-0.514708	6.13885	-7.72043	2.69e-14	2.34e-13	21.6784		ARF5	-0.209083	8.19753	-6.34834	3.23e-10	2.81e-09	12.6292
C1QTNF1	-0.262353	5.95556	-4.96039	8.2e-07	7.13e-06	5.27907		EIF4EBP1	0.345402	6.44864	7.72002	2.7e-14	2.35e-13	21.6754		CSTF2	0.273391	6.90382	6.34814	3.24e-10	2.81e-09	12.628
IQCC	0.221116	5.183	4.96035	8.2e-07	7.13e-06	5.27887		EIF4E3	-0.400398	6.32555	-7.71719	2.76e-14	2.39e-13	21.6549		DYRK1B	-0.279098	4.93256	-6.34575	3.28e-10	2.85e-09	12.6134
MAPK3	-0.20685	7.97195	-4.96028	8.2e-07	7.13e-06	5.27851		POLR2K	0.24074	6.86928	7.7169	2.76e-14	2.4e-13	21.6528		DAXX	-0.193326	6.47421	-6.34344	3.33e-10	2.89e-09	12.5994
POLB	0.169729	7.03013	4.95982	8.22e-07	7.14e-06	5.27633		TBX2	-0.3697	5.76053	-7.71649	2.77e-14	2.4e-13	21.6498		C3orf58	0.252004	6.2526	6.34268	3.35e-10	2.9e-09	12.5949
SPSB3	-0.204637	7.62645	-4.95946	8.24e-07	7.15e-06	5.27462		ODC1	0.380332	9.16495	7.71517	2.8e-14	2.43e-13	21.6402		NLGN2	-0.289038	5.44246	-6.34114	3.38e-10	2.93e-09	12.5855
PBX1	-0.283216	6.29487	-4.95937	8.24e-07	7.15e-06	5.27416		SRD5A1	0.431894	6.34898	7.71482	2.8e-14	2.43e-13	21.6377		STX10	-0.2283	7.36219	-6.33848	3.44e-10	2.98e-09	12.5694
POLR3G	0.154222	4.33487	4.9557	8.39e-07	7.28e-06	5.25666		MFN1	0.21138	6.0953	7.71303	2.84e-14	2.46e-13	21.6247		C7orf55	-0.271895	6.80699	-6.33654	3.48e-10	3.01e-09	12.5576
SERPINA4	0.346354	5.25728	4.95527	8.41e-07	7.29e-06	5.25457		MEIS3P1	-0.501082	6.3672	-7.71127	2.88e-14	2.49e-13	21.6119		EPN1	-0.269667	7.87863	-6.33637	3.48e-10	3.01e-09	12.5566
RPP38	0.1389	6.24023	4.9534	8.49e-07	7.35e-06	5.24565		MCM8	0.417885	6.84327	7.71097	2.89e-14	2.5e-13	21.6097		ARHGAP12	0.278501	6.96908	6.33569	3.5e-10	3.02e-09	12.5525
VWCE	0.257201	4.67228	4.953	8.51e-07	7.36e-06	5.24374		VTA1	0.242356	6.96888	7.70938	2.92e-14	2.53e-13	21.5982		PRTFDC1	0.385343	6.79979	6.33543	3.5e-10	3.03e-09	12.5509
PGBD2	0.143684	5.20622	4.95258	8.53e-07	7.37e-06	5.24173		LRRC8B	0.222992	5.04429	7.70426	3.03e-14	2.62e-13	21.561		SEMA4F	-0.233467	5.65289	-6.33402	3.53e-10	3.05e-09	12.5424
MKI67	0.258436	5.96294	4.95206	8.55e-07	7.39e-06	5.23928		ZAN	0.206738	4.14272	7.70302	3.06e-14	2.64e-13	21.552		VPS26B	-0.205402	6.60793	-6.33205	3.58e-10	3.09e-09	12.5304
POLR3C	0.140137	7.35724	4.95193	8.56e-07	7.39e-06	5.23867		FAM96A	0.280158	8.86016	7.70274	3.07e-14	2.65e-13	21.55		CLEC7A	0.258927	4.67714	6.32743	3.68e-10	3.17e-09	12.5025
ADAM10	0.203434	6.901	4.95176	8.56e-07	7.39e-06	5.23784		SORBS2	-0.550009	5.56951	-7.70185	3.09e-14	2.66e-13	21.5436		MAX	0.162523	6.07154	6.32569	3.72e-10	3.21e-09	12.492
STIP1	0.213743	7.92024	4.9514	8.58e-07	7.4e-06	5.23613		WDR18	0.282423	7.67309	7.70175	3.09e-14	2.66e-13	21.5428		MPZL2	0.380853	7.01731	6.32153	3.82e-10	3.29e-09	12.4668
TIGD2	0.177916	6.32554	4.94736	8.75e-07	7.55e-06	5.21687		DCHS1	-0.358822	5.79622	-7.70006	3.13e-14	2.7e-13	21.5306		PACS1	-0.294867	5.90481	-6.32097	3.83e-10	3.3e-09	12.4634
TRAF4	0.218377	5.4629	4.94671	8.78e-07	7.57e-06	5.21374		VTI1A	0.196409	4.94418	7.6999	3.13e-14	2.7e-13	21.5294		FPR2	0.304745	4.58871	6.3193	3.87e-10	3.33e-09	12.4533
CCDC130	-0.171918	7.43744	-4.94592	8.82e-07	7.59e-06	5.20998		RGS7BP	-0.425364	4.29998	-7.69525	3.24e-14	2.79e-13	21.4957		HES4	-0.460676	7.11595	-6.31768	3.91e-10	3.36e-09	12.4435
PDE8B	-0.251354	4.84443	-4.94575	8.83e-07	7.6e-06	5.20918		NRAS	0.291808	7.40781	7.69342	3.29e-14	2.83e-13	21.4824		PIK3R5	0.216334	4.72165	6.31701	3.93e-10	3.38e-09	12.4395
NCAPG2	0.272217	6.31883	4.94528	8.85e-07	7.61e-06	5.20693		GABARAP	-0.221117	7.9503	-7.69313	3.29e-14	2.83e-13	21.4803		TMEM127	-0.187236	6.46743	-6.31664	3.94e-10	3.38e-09	12.4373
NFIX	-0.316528	7.11598	-4.94387	8.91e-07	7.66e-06	5.20023		MYH10	-0.650039	7.60573	-7.69044	3.36e-14	2.89e-13	21.4609		SUDS3	0.204786	5.95961	6.3156	3.96e-10	3.4e-09	12.431
SPA17	0.227082	6.59479	4.94383	8.91e-07	7.66e-06	5.20002		ING5	0.167091	4.84807	7.68816	3.42e-14	2.94e-13	21.4443		GBP4	0.609335	6.68225	6.31519	3.97e-10	3.41e-09	12.4285
FOXRED1	0.192384	7.08277	4.94075	9.05e-07	7.77e-06	5.18534		SGCB	-0.286278	6.18202	-7.68473	3.5e-14	3.01e-13	21.4195		SLC27A2	0.59955	6.41252	6.31416	4e-10	3.43e-09	12.4223
TINF2	-0.196512	7.6513	-4.93474	9.33e-07	8e-06	5.15676		PATZ1	0.192	5.01595	7.67823	3.68e-14	3.16e-13	21.3725		SEMA4C	-0.233275	6.07715	-6.31237	4.05e-10	3.47e-09	12.4115
PPP1R3E	-0.178977	5.14521	-4.93349	9.38e-07	8.05e-06	5.15079		SH2D3C	-0.306195	5.26018	-7.67177	3.86e-14	3.31e-13	21.3258		INTS12	0.220174	7.4257	6.31169	4.06e-10	3.48e-09	12.4074
CAV3	0.230215	4.54876	4.93313	9.4e-07	8.06e-06	5.14908		DCK	0.3264	6.99367	7.66957	3.92e-14	3.36e-13	21.3099		ATP5G3	0.252635	7.37829	6.31047	4.09e-10	3.5e-09	12.4
SP5	0.420163	5.52273	4.93157	9.48e-07	8.12e-06	5.14165		ERH	0.231171	9.11778	7.66908	3.93e-14	3.37e-13	21.3063		C1orf35	-0.201775	6.40847	-6.31019	4.1e-10	3.51e-09	12.3983
COL4A6	-0.314011	4.51568	-4.92996	9.55e-07	8.18e-06	5.13403		RTKN	0.363981	6.15324	7.66722	3.99e-14	3.41e-13	21.2929		POLE2	0.391553	6.47208	6.30837	4.15e-10	3.54e-09	12.3874
PUS7	0.218218	7.53786	4.92927	9.58e-07	8.2e-06	5.13073		DGUOK	0.188772	7.49073	7.66707	3.99e-14	3.42e-13	21.2918		C3orf17	0.153966	6.34032	6.30576	4.21e-10	3.6e-09	12.3716
TBX21	0.253282	4.83933	4.92919	9.59e-07	8.2e-06	5.13035		PGD	0.365005	7.22489	7.66553	4.04e-14	3.45e-13	21.2807		GNB1	-0.172622	9.35531	-6.30236	4.31e-10	3.68e-09	12.3511
CLCN6	-0.179653	5.66	-4.92827	9.63e-07	8.23e-06	5.126		DDX54	0.221832	5.92971	7.66402	4.08e-14	3.49e-13	21.2698		NPHS2	0.342649	4.14672	6.30049	4.36e-10	3.72e-09	12.3398
DIO2	-0.369677	6.40087	-4.92812	9.64e-07	8.23e-06	5.12528		TMEM67	0.239196	4.55771	7.6608	4.18e-14	3.57e-13	21.2466		SCRN2	-0.193647	5.51324	-6.29975	4.38e-10	3.73e-09	12.3354
LAMC1	-0.246555	8.82826	-4.92811	9.64e-07	8.23e-06	5.12524		ZBTB11	0.276186	5.85831	7.65854	4.25e-14	3.63e-13	21.2303		DFFA	-0.214713	6.73496	-6.29931	4.39e-10	3.74e-09	12.3327
OSBPL5	-0.219319	6.32619	-4.92781	9.66e-07	8.24e-06	5.12378		KCNMA1	-0.724329	5.59167	-7.65656	4.31e-14	3.68e-13	21.216		SPPL2A	0.233227	8.04483	6.29771	4.43e-10	3.77e-09	12.3231
ZMYM3	0.127719	5.40727	4.92617	9.73e-07	8.3e-06	5.116		PMP2	-0.384353	3.97028	-7.65616	4.33e-14	3.69e-13	21.2131		UNC50	0.187566	8.54456	6.29687	4.45e-10	3.79e-09	12.318
ZBTB24	0.148834	6.03201	4.92378	9.85e-07	8.4e-06	5.10469		TMEM185B	0.3127	6.66112	7.656	4.33e-14	3.69e-13	21.212		B3GALT4	-0.264865	5.67116	-6.29495	4.51e-10	3.84e-09	12.3065
IQCB1	0.14104	6.36186	4.92366	9.86e-07	8.4e-06	5.10411		HNRNPC	0.20204	7.79209	7.65584	4.34e-14	3.69e-13	21.2108		PYGB	-0.448488	7.48888	-6.2941	4.53e-10	3.85e-09	12.3014
CRAT	-0.182108	5.80396	-4.92265	9.91e-07	8.43e-06	5.09929		FASTKD1	0.264437	7.10031	7.65548	4.35e-14	3.7e-13	21.2082		HSD17B11	0.42759	8.14281	6.29294	4.56e-10	3.88e-09	12.2944
PPY2	0.217348	3.70061	4.91962	1.01e-06	8.56e-06	5.08491		HSPBP1	0.268769	5.98022	7.65242	4.45e-14	3.78e-13	21.1861		PCTP	0.310984	6.56941	6.29199	4.59e-10	3.9e-09	12.2887
RNASE4	-0.349306	7.94378	-4.91657	1.02e-06	8.68e-06	5.07046		AES	-0.301125	7.69584	-7.6488	4.57e-14	3.88e-13	21.16		GAS2L1	-0.189387	5.54506	-6.29127	4.61e-10	3.92e-09	12.2843
NFE2L3	0.319229	7.19191	4.91602	1.02e-06	8.7e-06	5.06787		GSTCD	0.250677	5.76264	7.64375	4.74e-14	4.03e-13	21.1236		LONP1	-0.22538	7.50909	-6.29037	4.64e-10	3.94e-09	12.2789
ZNF516	-0.177523	5.09811	-4.91567	1.03e-06	8.71e-06	5.06619		NAGK	-0.246604	8.07163	-7.64327	4.76e-14	4.04e-13	21.1202		TRIO	-0.247584	5.39778	-6.2878	4.71e-10	4e-09	12.2635
RAN	0.170772	8.35495	4.91544	1.03e-06	8.72e-06	5.06513		SFT2D1	0.315123	8.14756	7.64135	4.83e-14	4.1e-13	21.1063		RRM2B	0.288962	6.45438	6.28717	4.73e-10	4.01e-09	12.2597
MYLPF	0.204904	4.40535	4.91441	1.03e-06	8.76e-06	5.06024		PLAGL1	-0.433603	6.04683	-7.63977	4.88e-14	4.14e-13	21.095		KIAA1524	0.288632	4.80252	6.28659	4.75e-10	4.02e-09	12.2562
TRMT61A	0.156546	5.96491	4.91349	1.04e-06	8.79e-06	5.05587		TXNL4B	0.202539	5.45763	7.6385	4.93e-14	4.18e-13	21.0859		ZNF485	0.263526	4.807	6.28359	4.84e-10	4.1e-09	12.2381
STK32B	-0.329501	4.74219	-4.91165	1.05e-06	8.87e-06	5.04714		DLC1	-0.442689	5.7338	-7.63795	4.95e-14	4.19e-13	21.0818		EDC3	-0.240315	6.01517	-6.2829	4.86e-10	4.11e-09	12.2339
NEXN	-0.482979	6.78967	-4.91034	1.05e-06	8.92e-06	5.04094		GALNT11	-0.290892	7.50395	-7.63678	4.99e-14	4.23e-13	21.0735		GLTSCR2	-0.32793	7.50504	-6.28253	4.87e-10	4.12e-09	12.2317
COPS3	0.132567	8.17257	4.90968	1.06e-06	8.95e-06	5.03785		TAF2	0.264528	7.15218	7.63386	5.1e-14	4.32e-13	21.0524		GPR124	-0.366056	6.27302	-6.28197	4.89e-10	4.13e-09	12.2284
TARSL2	-0.153947	5.4602	-4.90919	1.06e-06	8.96e-06	5.03552		COL8A2	-0.467615	5.93227	-7.63364	5.11e-14	4.32e-13	21.0508		SSBP1	0.248147	8.17746	6.27949	4.96e-10	4.19e-09	12.2135
ATP1A2	-0.478652	4.65154	-4.90878	1.06e-06	8.98e-06	5.03356		SLC25A17	0.231402	5.8835	7.63338	5.12e-14	4.33e-13	21.049		ZNF143	0.176257	6.76548	6.27935	4.97e-10	4.19e-09	12.2126
RBM14	0.136315	7.20564	4.90836	1.06e-06	8.99e-06	5.03158		GAS6	-0.503747	7.77771	-7.63271	5.14e-14	4.35e-13	21.0442		TMOD3	0.194069	5.74436	6.27757	5.02e-10	4.24e-09	12.202
PACSIN3	0.341212	5.77378	4.90824	1.06e-06	8.99e-06	5.031		C11orf57	0.179182	5.92005	7.62777	5.33e-14	4.5e-13	21.0086		SRF	-0.290594	7.31081	-6.27645	5.06e-10	4.26e-09	12.1953
DOHH	0.170796	5.22363	4.90756	1.07e-06	9.01e-06	5.0278		CCDC43	0.249034	6.5671	7.62773	5.33e-14	4.5e-13	21.0084		C9orf114	-0.225371	6.65619	-6.27618	5.06e-10	4.27e-09	12.1936
GBP1	0.355788	7.59886	4.90753	1.07e-06	9.01e-06	5.02765		CASQ2	-0.879483	5.16381	-7.62741	5.35e-14	4.51e-13	21.006		NAV1	-0.289665	5.67331	-6.27512	5.1e-10	4.29e-09	12.1873
TFRC	0.224535	8.74228	4.90606	1.08e-06	9.07e-06	5.02072		CACNB2	-0.417778	4.36557	-7.62651	5.38e-14	4.54e-13	20.9995		PPP2R3A	-0.391109	5.68612	-6.27465	5.11e-10	4.3e-09	12.1844
PDS5A	0.127255	7.10522	4.90419	1.09e-06	9.15e-06	5.01186		RASSF2	-0.45065	6.63538	-7.62637	5.39e-14	4.54e-13	20.9986		SHROOM1	-0.257009	5.31897	-6.2739	5.14e-10	4.32e-09	12.1799
NR0B2	-0.420338	5.40621	-4.90412	1.09e-06	9.15e-06	5.01153		TACC3	0.447064	6.30881	7.62542	5.43e-14	4.57e-13	20.9918		CBX6	-0.489768	7.12804	-6.27346	5.15e-10	4.33e-09	12.1773
CFH	-0.428605	6.783	-4.90352	1.09e-06	9.17e-06	5.00869		PJA2	-0.375695	8.61401	-7.62466	5.46e-14	4.59e-13	20.9863		CCR2	0.334842	4.81483	6.272	5.2e-10	4.37e-09	12.1685
GRHL1	0.218632	5.12289	4.90289	1.09e-06	9.2e-06	5.00572		ZCCHC4	0.207497	4.49153	7.6223	5.55e-14	4.67e-13	20.9693		PUM1	-0.143172	8.80413	-6.26912	5.29e-10	4.44e-09	12.1512
A2M	-0.318277	8.27335	-4.90246	1.1e-06	9.21e-06	5.00367		EPRS	0.223654	8.61492	7.62021	5.64e-14	4.74e-13	20.9543		PPIL3	0.174593	7.54098	6.26847	5.31e-10	4.46e-09	12.1473
ATP1B3	0.177591	7.79769	4.9022	1.1e-06	9.22e-06	5.00244		GSPT2	-0.674977	6.33805	-7.62012	5.64e-14	4.74e-13	20.9536		DNAJB14	0.189653	6.67684	6.26728	5.35e-10	4.49e-09	12.1402
UCN3	0.199747	4.33821	4.902	1.1e-06	9.22e-06	5.00151		C9orf41	0.202874	5.29442	7.6189	5.69e-14	4.78e-13	20.9449		ADAM15	-0.244389	7.43906	-6.26539	5.41e-10	4.54e-09	12.1289
UBA2	0.170678	6.53204	4.89993	1.11e-06	9.31e-06	4.99173		HOXB2	-0.541031	6.64099	-7.61845	5.71e-14	4.79e-13	20.9416		ALDH16A1	-0.277492	6.48408	-6.26372	5.47e-10	4.58e-09	12.1189
ACADM	-0.211312	8.156	-4.89962	1.11e-06	9.32e-06	4.99027		TRIM24	0.387375	6.43593	7.61839	5.71e-14	4.79e-13	20.9412		DECR1	0.322792	8.61998	6.26278	5.5e-10	4.61e-09	12.1132
GABARAPL2	-0.164644	8.67835	-4.89822	1.12e-06	9.38e-06	4.98367		CUEDC1	-0.432832	6.88197	-7.6169	5.78e-14	4.84e-13	20.9305		CLEC16A	-0.24156	6.46413	-6.26246	5.51e-10	4.62e-09	12.1113
SLC35F5	0.20006	6.49537	4.89805	1.12e-06	9.39e-06	4.98285		RBMX2	0.20891	6.4509	7.61462	5.87e-14	4.92e-13	20.9142		CC2D2B	-0.296681	4.43942	-6.26166	5.54e-10	4.64e-09	12.1065
ALX4	0.18566	4.24249	4.8972	1.12e-06	9.42e-06	4.97883		USP10	0.253565	6.70276	7.61377	5.91e-14	4.95e-13	20.908		MAPK7	-0.199928	5.49229	-6.26091	5.57e-10	4.65e-09	12.102
ESAM	-0.288067	6.34745	-4.89704	1.13e-06	9.42e-06	4.97805		PDAP1	0.320099	5.48889	7.61359	5.92e-14	4.95e-13	20.9068		YY1AP1	-0.193129	7.46118	-6.26081	5.57e-10	4.65e-09	12.1015
BAI3	-0.255685	3.99434	-4.89632	1.13e-06	9.45e-06	4.97465		DLG4	-0.316824	4.87798	-7.6126	5.96e-14	4.99e-13	20.8997		CKS1B	0.412633	8.50178	6.26076	5.57e-10	4.65e-09	12.1011
IL4R	-0.18975	7.23695	-4.89526	1.14e-06	9.5e-06	4.96967		PDIK1L	0.276612	6.61841	7.61172	6e-14	5.02e-13	20.8934		CHST6	-0.465114	4.18553	-6.25828	5.66e-10	4.72e-09	12.0863
PHF14	0.151267	6.43895	4.89368	1.14e-06	9.57e-06	4.96219		DNAJA3	0.239771	8.29687	7.60865	6.14e-14	5.13e-13	20.8713		ILVBL	-0.220156	7.17519	-6.25787	5.67e-10	4.73e-09	12.0838
RABGAP1	-0.195196	7.77352	-4.89307	1.15e-06	9.59e-06	4.95931		MAMLD1	-0.384049	5.16093	-7.60861	6.14e-14	5.13e-13	20.8711		CORO6	-0.231878	4.51469	-6.25776	5.68e-10	4.73e-09	12.0831
ZNF283	0.185439	4.64625	4.89218	1.15e-06	9.63e-06	4.95514		NUDCD2	0.278015	6.06198	7.60835	6.15e-14	5.13e-13	20.8691		ATAD2	0.413424	6.76066	6.25764	5.68e-10	4.73e-09	12.0825
NUDT11	-0.324492	4.81851	-4.89096	1.16e-06	9.68e-06	4.94939		EVC	-0.361684	4.89088	-7.60819	6.16e-14	5.14e-13	20.868		PIGZ	-0.363957	5.46074	-6.25703	5.7e-10	4.75e-09	12.0788
ZNF264	-0.208119	5.88384	-4.89079	1.16e-06	9.68e-06	4.94858		RBBP8	0.334839	7.47126	7.60541	6.28e-14	5.24e-13	20.8481		POLR3F	0.294119	6.07401	6.25608	5.74e-10	4.77e-09	12.0731
CAD	0.167666	5.92461	4.8903	1.16e-06	9.7e-06	4.94628		HCCS	0.265756	6.90489	7.60452	6.32e-14	5.27e-13	20.8417		RRAS2	0.393458	6.80891	6.25451	5.79e-10	4.82e-09	12.0637
KIAA0391	0.157891	6.2191	4.88898	1.17e-06	9.76e-06	4.94006		PAXIP1	0.308861	7.04393	7.60001	6.54e-14	5.44e-13	20.8094		FANCI	0.413258	6.3261	6.25242	5.87e-10	4.88e-09	12.0512
SLC4A9	0.163072	3.94449	4.88438	1.2e-06	9.98e-06	4.91836		AASS	-0.323447	4.83676	-7.59842	6.61e-14	5.5e-13	20.798		CXCL3	0.616486	6.19758	6.25213	5.88e-10	4.88e-09	12.0495
SRCAP	0.127277	5.01535	4.88166	1.21e-06	1.01e-05	4.90553		CCL11	-0.689005	6.15617	-7.59837	6.62e-14	5.5e-13	20.7976		LYAR	0.253673	7.06689	6.25091	5.92e-10	4.92e-09	12.0422
TTF2	0.20469	6.10783	4.88158	1.22e-06	1.01e-05	4.90518		DUSP3	-0.368609	8.1461	-7.59355	6.85e-14	5.7e-13	20.7631		CD163	0.52427	6.68235	6.24932	5.98e-10	4.96e-09	12.0327
RPGR	0.163545	5.62243	4.88113	1.22e-06	1.01e-05	4.90307		RAB31	-0.544127	8.76347	-7.5923	6.92e-14	5.75e-13	20.7541		PTPN23	-0.215648	5.50966	-6.24919	5.98e-10	4.97e-09	12.0319
ZNF274	-0.170069	6.2118	-4.88055	1.22e-06	1.01e-05	4.90034		MAGEH1	-0.365631	6.20589	-7.59068	7e-14	5.81e-13	20.7426		CKB	-0.671439	7.08362	-6.2432	6.21e-10	5.15e-09	11.9961
SETD6	0.22247	5.20141	4.87881	1.23e-06	1.02e-05	4.89216		WHSC1	0.220975	5.18275	7.5894	7.07e-14	5.86e-13	20.7334		PPP1R9A	-0.527317	5.25821	-6.24299	6.22e-10	5.15e-09	11.9948
FBXL22	-0.467206	4.374	-4.87765	1.24e-06	1.03e-05	4.88668		CLU	-0.503254	5.72198	-7.58909	7.08e-14	5.87e-13	20.7312		MAN2A1	0.262943	7.31595	6.24078	6.3e-10	5.22e-09	11.9816
NOB1	0.172384	6.70801	4.87638	1.25e-06	1.03e-05	4.8807		GLIPR1	-0.524325	6.51292	-7.58634	7.23e-14	5.99e-13	20.7115		TARS	0.278395	7.66788	6.24039	6.32e-10	5.23e-09	11.9793
IQSEC2	-0.140029	5.07855	-4.87616	1.25e-06	1.03e-05	4.87966		TNC	-0.765427	6.60127	-7.5861	7.24e-14	6e-13	20.7097		PDE9A	-0.428865	4.87519	-6.23942	6.36e-10	5.26e-09	11.9735
MOSPD3	-0.17119	5.86426	-4.87599	1.25e-06	1.03e-05	4.8789		E2F3	0.295698	7.38584	7.585	7.3e-14	6.04e-13	20.7019		KIFC2	-0.383999	6.09072	-6.23676	6.46e-10	5.34e-09	11.9576
HUS1B	0.147963	4.51538	4.87598	1.25e-06	1.03e-05	4.87882		RNASEH2B	0.354074	6.05504	7.58331	7.39e-14	6.12e-13	20.6898		RFT1	0.186421	5.15668	6.23579	6.5e-10	5.37e-09	11.9518
PVR	0.239787	5.98582	4.87402	1.26e-06	1.04e-05	4.86963		PEA15	-0.315184	8.66537	-7.5831	7.4e-14	6.12e-13	20.6883		C1orf43	0.231845	8.05129	6.23507	6.53e-10	5.39e-09	11.9475
CHD9	-0.170441	7.2533	-4.87337	1.27e-06	1.05e-05	4.86655		COL15A1	-0.601361	8.36986	-7.58047	7.54e-14	6.24e-13	20.6695		TBX21	0.356518	4.83933	6.23395	6.57e-10	5.43e-09	11.9409
BZW2	0.207818	9.09195	4.87256	1.27e-06	1.05e-05	4.86274		POLR3GL	-0.291649	7.9801	-7.57872	7.64e-14	6.31e-13	20.657		FLJ38717	-0.391904	5.41239	-6.23356	6.59e-10	5.44e-09	11.9385
KLHDC8B	-0.236936	6.8409	-4.87235	1.27e-06	1.05e-05	4.86176		TAF5L	0.180292	5.47926	7.57649	7.76e-14	6.41e-13	20.641		ABHD13	0.203598	5.15892	6.23297	6.61e-10	5.45e-09	11.935
WDR77	0.158374	6.8433	4.87114	1.28e-06	1.06e-05	4.85609		SLC27A5	0.387737	5.47154	7.57631	7.77e-14	6.42e-13	20.6397		BUB1	0.421151	5.86305	6.23129	6.68e-10	5.51e-09	11.925
MDN1	0.134054	5.07501	4.86972	1.29e-06	1.06e-05	4.84939		SLC16A7	-0.390398	4.8853	-7.57612	7.79e-14	6.42e-13	20.6384		DENND2A	-0.377622	5.43176	-6.23051	6.71e-10	5.53e-09	11.9204
A4GALT	-0.263725	5.33937	-4.86906	1.29e-06	1.07e-05	4.84632		NR3C2	-0.543057	6.23022	-7.57271	7.98e-14	6.58e-13	20.6141		VPS72	-0.225798	7.2422	-6.23043	6.72e-10	5.53e-09	11.9199
PTPRA	0.118161	6.24841	4.86875	1.3e-06	1.07e-05	4.84484		RBM6	-0.366065	6.86493	-7.57129	8.06e-14	6.65e-13	20.6039		CTLA4	0.333923	5.03876	6.22826	6.81e-10	5.6e-09	11.9069
GNPDA2	-0.22653	6.13904	-4.86671	1.31e-06	1.08e-05	4.83527		LPL	-0.574479	5.7581	-7.57004	8.14e-14	6.7e-13	20.595		ZHX3	-0.252796	5.596	-6.22821	6.81e-10	5.6e-09	11.9066
HTR6	0.188445	4.36584	4.8657	1.31e-06	1.08e-05	4.83053		TSEN54	0.29015	6.48781	7.56911	8.19e-14	6.75e-13	20.5883		SGSM3	-0.273588	6.10307	-6.2282	6.81e-10	5.6e-09	11.9065
VGLL4	-0.170902	8.28061	-4.86436	1.32e-06	1.09e-05	4.82426		FAM111B	0.383944	4.84344	7.56895	8.2e-14	6.75e-13	20.5872		PTGER4	0.44145	7.17087	6.22809	6.82e-10	5.6e-09	11.9059
HELZ	-0.128863	6.65747	-4.86366	1.33e-06	1.09e-05	4.82096		SFXN1	0.37957	6.16289	7.5685	8.23e-14	6.77e-13	20.584		PTPDC1	-0.207357	5.45352	-6.22569	6.92e-10	5.68e-09	11.8916
DEXI	-0.208209	7.21192	-4.86356	1.33e-06	1.09e-05	4.8205		ALKBH2	0.289575	6.74179	7.56794	8.26e-14	6.79e-13	20.58		PEF1	-0.177181	7.57213	-6.22562	6.92e-10	5.68e-09	11.8912
MTIF2	0.148647	7.7435	4.86248	1.34e-06	1.1e-05	4.81542		ULK1	-0.342519	6.72089	-7.56793	8.27e-14	6.79e-13	20.5799		DMPK	-0.390628	5.17838	-6.22554	6.92e-10	5.68e-09	11.8907
HPS3	0.190269	6.22658	4.86191	1.34e-06	1.1e-05	4.81274		CCL19	-1.00013	6.56751	-7.56741	8.3e-14	6.81e-13	20.5762		GTPBP8	0.184868	6.44594	6.2253	6.93e-10	5.68e-09	11.8893
ATXN1	-0.197948	6.1639	-4.8615	1.34e-06	1.1e-05	4.81085		WWC3	-0.413037	6.73743	-7.567	8.32e-14	6.83e-13	20.5733		HIPK3	0.186128	5.61475	6.22363	7.01e-10	5.74e-09	11.8793
BAG4	0.181841	6.06026	4.85977	1.35e-06	1.11e-05	4.8027		SRP72	0.211891	7.26295	7.56295	8.57e-14	7.03e-13	20.5444		PBK	0.578284	7.09804	6.22253	7.05e-10	5.77e-09	11.8728
NUP85	0.151514	7.83273	4.85921	1.36e-06	1.11e-05	4.8001		HIST1H1B	0.433321	4.14668	7.56031	8.74e-14	7.16e-13	20.5255		B4GALT7	-0.223362	6.85008	-6.22231	7.06e-10	5.78e-09	11.8715
DNAJB2	-0.168625	7.12507	-4.85899	1.36e-06	1.11e-05	4.79906		ITGA1	-0.471729	6.14465	-7.55876	8.84e-14	7.24e-13	20.5145		RNF138	0.27452	6.73015	6.22193	7.08e-10	5.79e-09	11.8692
RPRM	-0.405986	4.7879	-4.85745	1.37e-06	1.12e-05	4.79183		NASP	0.254714	6.59205	7.55834	8.86e-14	7.26e-13	20.5115		STEAP1	0.543054	7.00521	6.2219	7.08e-10	5.79e-09	11.869
ZBTB6	0.197767	4.88973	4.85718	1.37e-06	1.12e-05	4.7906		ABCA9	-0.331299	4.49325	-7.55763	8.91e-14	7.29e-13	20.5064		USP4	-0.183752	6.90087	-6.22165	7.09e-10	5.79e-09	11.8675
C11orf68	-0.160419	6.37227	-4.85493	1.39e-06	1.13e-05	4.78006		BRI3BP	0.383956	7.6004	7.55517	9.07e-14	7.42e-13	20.4889		CCDC132	0.252668	5.44171	6.22103	7.12e-10	5.81e-09	11.8639
IFNA5	0.208588	3.75172	4.85437	1.39e-06	1.14e-05	4.77743		DHX33	0.264422	6.96214	7.55081	9.36e-14	7.65e-13	20.4578		ZDHHC14	-0.278105	5.8681	-6.22027	7.15e-10	5.84e-09	11.8593
TTLL7	-0.357144	4.71733	-4.85321	1.4e-06	1.14e-05	4.77197		NRXN2	-0.510893	4.66279	-7.55047	9.39e-14	7.67e-13	20.4554		CALCRL	0.424242	5.98438	6.21859	7.23e-10	5.89e-09	11.8493
TGM4	0.108603	4.04466	4.85039	1.42e-06	1.16e-05	4.75881		TTLL4	0.281173	5.48837	7.55029	9.4e-14	7.68e-13	20.4541		SNRPF	0.273481	9.12118	6.21828	7.24e-10	5.9e-09	11.8474
REEP1	-0.497462	5.91326	-4.84946	1.42e-06	1.16e-05	4.75443		CDH11	-0.584016	7.64052	-7.54928	9.47e-14	7.73e-13	20.4469		MAP4K2	-0.448912	6.20816	-6.21702	7.3e-10	5.94e-09	11.84
LRRC37A2	-0.142047	5.28808	-4.84859	1.43e-06	1.17e-05	4.75037		SYT11	-0.485804	6.52959	-7.54903	9.49e-14	7.74e-13	20.4451		MOSPD3	-0.242932	5.86426	-6.217	7.3e-10	5.94e-09	11.8399
CCDC50	-0.188821	6.88867	-4.84387	1.46e-06	1.19e-05	4.7283		HOXA5	-0.603532	7.17863	-7.54861	9.51e-14	7.76e-13	20.4422		CREM	0.259683	5.49046	6.21675	7.31e-10	5.95e-09	11.8384
KCNJ16	-0.396146	4.371	-4.84296	1.47e-06	1.2e-05	4.72404		LDHA	0.263574	10.5972	7.54663	9.65e-14	7.87e-13	20.428		DIAPH3	0.304652	5.38606	6.21642	7.32e-10	5.96e-09	11.8364
ABHD4	-0.13507	5.95075	-4.84263	1.47e-06	1.2e-05	4.72252		PSMD3	0.437774	6.90371	7.54553	9.73e-14	7.92e-13	20.4202		KLF4	0.52097	7.4707	6.21571	7.36e-10	5.98e-09	11.8322
ESCO1	0.202502	6.11658	4.84223	1.48e-06	1.2e-05	4.72066		ADAMTS9	-0.368573	5.58651	-7.54543	9.74e-14	7.93e-13	20.4195		WDR45	-0.199945	6.73445	-6.21526	7.38e-10	5.99e-09	11.8295
HEG1	-0.250129	6.85911	-4.84106	1.48e-06	1.21e-05	4.71519		GIMAP8	-0.432429	6.08285	-7.54489	9.78e-14	7.95e-13	20.4157		ETFA	0.299714	8.93026	6.21505	7.38e-10	6e-09	11.8283
POLA2	0.180928	6.32835	4.83975	1.49e-06	1.22e-05	4.70905		COQ2	0.297896	6.9528	7.54283	9.92e-14	8.07e-13	20.401		SETDB1	-0.232239	6.39245	-6.21447	7.41e-10	6.02e-09	11.8248
LGALS8	0.155856	6.62081	4.839	1.5e-06	1.22e-05	4.70553		C1orf131	0.279652	7.99069	7.54263	9.94e-14	8.08e-13	20.3996		FUT11	0.292958	5.4432	6.21417	7.42e-10	6.02e-09	11.823
MEF2C	-0.288027	6.26794	-4.83821	1.51e-06	1.22e-05	4.70185		SFRP2	-1.16802	7.49704	-7.54243	9.95e-14	8.08e-13	20.3981		PLCD1	-0.245233	5.83513	-6.21371	7.45e-10	6.04e-09	11.8203
LOXL4	-0.318523	5.39427	-4.83753	1.51e-06	1.23e-05	4.69868		HSPA9	0.241838	8.22924	7.54127	1e-13	8.15e-13	20.3899		SPOP	-0.255156	7.86728	-6.21249	7.5e-10	6.08e-09	11.813
CD80	0.169024	4.74295	4.83732	1.51e-06	1.23e-05	4.69771		DPP3	0.293031	6.96637	7.54101	1.01e-13	8.16e-13	20.3881		SLC46A2	0.322568	4.43543	6.21206	7.52e-10	6.09e-09	11.8104
GTF2A2	0.190209	7.51177	4.83679	1.52e-06	1.23e-05	4.69524		UGCG	-0.362013	8.02884	-7.53962	1.02e-13	8.24e-13	20.3782		GNG10	0.315934	8.00184	6.21082	7.58e-10	6.14e-09	11.8031
SHE	-0.228028	5.33803	-4.83418	1.54e-06	1.24e-05	4.68306		MKKS	0.248729	7.56655	7.53915	1.02e-13	8.26e-13	20.3748		TOR1AIP1	0.265249	7.20333	6.21044	7.6e-10	6.15e-09	11.8008
PAWR	0.187043	6.55415	4.83393	1.54e-06	1.25e-05	4.68191		PANK1	0.43376	6.48981	7.53862	1.02e-13	8.29e-13	20.371		WDR76	0.232439	4.73924	6.20876	7.68e-10	6.21e-09	11.7908
OSR1	-0.451567	5.04789	-4.83342	1.54e-06	1.25e-05	4.67954		SDHB	0.230808	7.96273	7.53843	1.02e-13	8.29e-13	20.3697		MUTYH	-0.23337	6.55209	-6.20729	7.75e-10	6.26e-09	11.7821
ATP6V1C1	0.146582	6.51891	4.83322	1.54e-06	1.25e-05	4.67859		CSRP2	-0.501067	6.95841	-7.53401	1.06e-13	8.56e-13	20.3383		CENPL	0.312165	6.01003	6.20329	7.94e-10	6.41e-09	11.7584
ANP32C	0.197291	3.84198	4.83291	1.55e-06	1.25e-05	4.67713		MAGI2	-0.314857	4.50964	-7.52986	1.09e-13	8.82e-13	20.3088		TMEM104	-0.256014	5.2866	-6.20259	7.97e-10	6.44e-09	11.7542
SFXN3	-0.15679	5.79153	-4.83267	1.55e-06	1.25e-05	4.67601		CCDC8	-0.300507	4.7602	-7.52658	1.12e-13	9.03e-13	20.2854		TULP3	-0.236784	6.02079	-6.20067	8.07e-10	6.51e-09	11.7428
SORBS3	-0.173765	5.78123	-4.83198	1.55e-06	1.25e-05	4.6728		MRPL49	0.242621	7.61297	7.52227	1.15e-13	9.31e-13	20.2548		WDR46	-0.292372	6.93795	-6.19987	8.11e-10	6.54e-09	11.738
CSPG4	-0.353124	5.30608	-4.83141	1.56e-06	1.26e-05	4.67016		ICAM2	-0.421974	7.26801	-7.51868	1.18e-13	9.55e-13	20.2293		HOXB4	-0.298479	5.51786	-6.19969	8.11e-10	6.54e-09	11.7369
WNT2B	-0.269493	5.26668	-4.82892	1.58e-06	1.27e-05	4.65852		RGS2	-0.56198	9.02528	-7.51756	1.19e-13	9.62e-13	20.2214		VCPIP1	0.212817	6.21072	6.19723	8.24e-10	6.64e-09	11.7224
PRKAB1	-0.181887	6.72481	-4.82832	1.58e-06	1.27e-05	4.65573		ESAM	-0.448015	6.34745	-7.51691	1.2e-13	9.66e-13	20.2168		APAF1	0.216864	6.12818	6.19674	8.26e-10	6.65e-09	11.7194
KIF18B	0.204662	5.47118	4.82825	1.58e-06	1.27e-05	4.65541		SLC25A10	0.404666	6.35635	7.51557	1.21e-13	9.75e-13	20.2073		HOMER3	-0.314521	5.52555	-6.19593	8.3e-10	6.68e-09	11.7147
GABRP	-0.934317	6.21554	-4.8282	1.58e-06	1.27e-05	4.65521		RAI14	-0.42336	8.07945	-7.51067	1.25e-13	1.01e-12	20.1725		SMC2	0.288834	6.34142	6.19477	8.36e-10	6.73e-09	11.7078
TMEM209	0.16005	6.71398	4.82722	1.59e-06	1.28e-05	4.65063		EPHA3	-0.525418	4.8859	-7.50974	1.26e-13	1.02e-12	20.1659		HMBOX1	-0.224807	5.85766	-6.19361	8.42e-10	6.77e-09	11.7009
RIMS1	-0.284228	4.23735	-4.82614	1.6e-06	1.29e-05	4.64559		HEYL	-0.505341	6.66846	-7.50766	1.28e-13	1.03e-12	20.1511		SMEK1	0.136503	5.45553	6.1921	8.5e-10	6.83e-09	11.6919
RAMP1	-0.405749	6.7337	-4.82461	1.61e-06	1.29e-05	4.63845		MRPS31	0.253948	7.5179	7.50709	1.29e-13	1.03e-12	20.1471		ABCD1	-0.355557	5.86072	-6.19189	8.51e-10	6.83e-09	11.6907
SDHC	0.151179	7.38108	4.82437	1.61e-06	1.3e-05	4.63735		MAP1A	-0.3687	5.26698	-7.50527	1.3e-13	1.05e-12	20.1343		DNAJB9	0.29789	7.46861	6.19058	8.58e-10	6.89e-09	11.6829
RFTN2	-0.201527	5.28077	-4.82309	1.62e-06	1.3e-05	4.63138		YARS2	0.263512	7.26492	7.50477	1.31e-13	1.05e-12	20.1307		IDH1	0.342196	8.48989	6.1898	8.62e-10	6.92e-09	11.6783
PRPF18	0.156383	6.24001	4.82277	1.62e-06	1.3e-05	4.62989		NCALD	-0.456128	5.72879	-7.50425	1.31e-13	1.05e-12	20.127		NLK	0.260615	6.29356	6.18903	8.66e-10	6.94e-09	11.6737
HIST1H3B	0.225132	4.07785	4.82264	1.63e-06	1.3e-05	4.62931		ARHGEF10	-0.429597	6.18947	-7.50214	1.33e-13	1.07e-12	20.112		TRMT61B	0.206271	6.86689	6.18719	8.76e-10	7.02e-09	11.6628
OBFC1	-0.188958	6.65786	-4.82126	1.64e-06	1.31e-05	4.6229		THBS3	-0.416795	6.16215	-7.50197	1.34e-13	1.07e-12	20.1109		SPCS3	0.273522	7.1709	6.18537	8.86e-10	7.09e-09	11.652
AP2M1	-0.143846	8.13023	-4.81992	1.65e-06	1.32e-05	4.61667		PRMT1	0.259429	7.72575	7.50152	1.34e-13	1.07e-12	20.1077		ZNF567	0.210244	5.12108	6.18474	8.89e-10	7.12e-09	11.6483
USP11	-0.215908	6.86647	-4.81943	1.65e-06	1.32e-05	4.61438		MRPS15	0.229692	7.80503	7.50119	1.34e-13	1.08e-12	20.1053		FCHO2	0.28793	6.71058	6.18452	8.9e-10	7.12e-09	11.647
ZFR	0.146372	7.65007	4.81687	1.67e-06	1.34e-05	4.60247		WDR34	0.371257	7.28861	7.50035	1.35e-13	1.08e-12	20.0994		ZNF789	-0.257027	5.50276	-6.18358	8.96e-10	7.16e-09	11.6415
NEK10	0.208474	4.26606	4.81383	1.7e-06	1.36e-05	4.58834		KLHDC8B	-0.369534	6.8409	-7.50011	1.35e-13	1.08e-12	20.0977		FAM102B	0.349534	7.45228	6.18292	8.99e-10	7.19e-09	11.6376
WDR47	-0.147436	6.04367	-4.81071	1.72e-06	1.38e-05	4.57385		FBXO32	-0.56619	6.36048	-7.49868	1.37e-13	1.09e-12	20.0876		CRYGS	-0.304163	4.93366	-6.18039	9.13e-10	7.29e-09	11.6225
CEP152	0.139504	4.83277	4.80957	1.73e-06	1.39e-05	4.56857		CRNKL1	0.247937	6.46356	7.49488	1.41e-13	1.12e-12	20.0606		EGFL7	-0.290145	5.4392	-6.17954	9.18e-10	7.33e-09	11.6175
RAB9B	-0.379062	5.17115	-4.80793	1.75e-06	1.4e-05	4.56097		NCAPH2	0.186151	5.20278	7.49297	1.42e-13	1.14e-12	20.0471		PRPF40A	0.184061	7.24847	6.17916	9.2e-10	7.34e-09	11.6153
EAF1	0.200291	6.5561	4.80776	1.75e-06	1.4e-05	4.56015		SPTY2D1	0.247137	6.43906	7.49188	1.44e-13	1.15e-12	20.0395		VAPB	-0.219469	5.9026	-6.17809	9.26e-10	7.39e-09	11.6089
ADRM1	0.194759	8.08058	4.80722	1.75e-06	1.4e-05	4.55767		YPEL2	-0.283233	6.21741	-7.49054	1.45e-13	1.16e-12	20.03		SCUBE2	-0.547922	4.83131	-6.17782	9.28e-10	7.39e-09	11.6074
MRPL9	0.15668	7.39827	4.80646	1.76e-06	1.4e-05	4.55414		PLEKHF2	0.275264	6.58082	7.48998	1.46e-13	1.16e-12	20.026		PWP1	0.153879	8.07506	6.17765	9.29e-10	7.4e-09	11.6064
TMEM67	0.148113	4.55771	4.80625	1.76e-06	1.4e-05	4.55315		PIK3IP1	-0.374161	6.87034	-7.48976	1.46e-13	1.16e-12	20.0244		SOX12	-0.205756	4.74405	-6.17533	9.42e-10	7.5e-09	11.5926
PDYN	0.186548	3.96141	4.80438	1.78e-06	1.42e-05	4.54447		FAM89B	-0.250812	7.19058	-7.48923	1.46e-13	1.17e-12	20.0207		TAF8	0.198716	4.81756	6.17502	9.44e-10	7.51e-09	11.5908
NUDT16	-0.154048	5.53108	-4.80285	1.79e-06	1.43e-05	4.53737		ZNHIT3	0.233964	7.95781	7.48816	1.48e-13	1.18e-12	20.0131		BEGAIN	-0.30471	4.69195	-6.17456	9.46e-10	7.53e-09	11.5881
TMOD1	-0.361995	5.57246	-4.80275	1.79e-06	1.43e-05	4.53695		CHCHD7	0.28462	7.1007	7.48613	1.5e-13	1.19e-12	19.9988		ZNF408	-0.255496	5.97794	-6.17425	9.48e-10	7.54e-09	11.5862
HHATL	0.207319	3.97506	4.80177	1.8e-06	1.43e-05	4.53239		PHC1	-0.267165	5.8152	-7.48484	1.51e-13	1.2e-12	19.9896		BCKDHB	0.28552	5.91719	6.17218	9.6e-10	7.63e-09	11.574
TBC1D2B	-0.167722	6.59104	-4.80175	1.8e-06	1.43e-05	4.53227		NFYA	0.236562	5.31211	7.48458	1.51e-13	1.2e-12	19.9878		PRCC	-0.18738	6.42107	-6.17171	9.63e-10	7.65e-09	11.5712
TBC1D13	-0.149328	6.28441	-4.80067	1.81e-06	1.44e-05	4.52729		YWHAZ	0.222729	10.1543	7.4841	1.52e-13	1.21e-12	19.9844		CSPG4	-0.50196	5.30608	-6.17059	9.7e-10	7.7e-09	11.5646
NLE1	0.157424	5.24846	4.80038	1.81e-06	1.44e-05	4.52596		SLC9A9	-0.432691	5.46548	-7.48319	1.53e-13	1.22e-12	19.978		ASB1	-0.262073	5.7069	-6.16986	9.74e-10	7.73e-09	11.5603
UTS2R	0.151617	5.25421	4.80029	1.81e-06	1.44e-05	4.52553		CYP1B1	-0.820183	6.53737	-7.48293	1.53e-13	1.22e-12	19.9762		SCAMP3	-0.204325	7.70811	-6.16881	9.8e-10	7.77e-09	11.5541
FAM50B	-0.306547	6.30383	-4.79951	1.82e-06	1.44e-05	4.5219		LOC389641	0.424894	5.61348	7.48223	1.54e-13	1.22e-12	19.9712		PCBP1	0.179795	9.51064	6.16832	9.83e-10	7.79e-09	11.5512
CAND2	-0.261083	5.03533	-4.79939	1.82e-06	1.44e-05	4.52138		TCEAL2	-1.03189	5.50527	-7.4818	1.54e-13	1.23e-12	19.9682		ST3GAL3	-0.187507	4.91764	-6.16111	1.03e-09	8.14e-09	11.5086
MAP1B	-0.354476	6.15581	-4.79935	1.82e-06	1.44e-05	4.52119		PRSS23	-0.520358	7.39923	-7.48145	1.55e-13	1.23e-12	19.9657		EVI2B	0.465153	6.45	6.16069	1.03e-09	8.15e-09	11.5061
DPY19L2	-0.239945	4.27049	-4.79889	1.83e-06	1.45e-05	4.51905		ABCB10	0.298191	6.91382	7.48018	1.56e-13	1.24e-12	19.9567		OSTM1	0.249822	6.06856	6.15944	1.04e-09	8.21e-09	11.4987
FANCF	0.168543	5.87278	4.7988	1.83e-06	1.45e-05	4.51864		CFL2	-0.501468	5.74502	-7.47945	1.57e-13	1.24e-12	19.9516		MGRN1	-0.327443	6.82789	-6.15903	1.04e-09	8.23e-09	11.4964
GNPNAT1	0.21476	6.87729	4.79818	1.83e-06	1.45e-05	4.51575		AHCTF1	0.202248	6.71824	7.47739	1.59e-13	1.26e-12	19.937		NOL7	0.202186	9.01188	6.15858	1.04e-09	8.24e-09	11.4937
CLIP2	-0.211289	6.23565	-4.79734	1.84e-06	1.46e-05	4.51187		C2CD2	-0.263525	7.18733	-7.47601	1.61e-13	1.27e-12	19.9273		COG4	-0.223444	6.47988	-6.15832	1.04e-09	8.25e-09	11.4922
ZDHHC7	-0.16623	8.25434	-4.79624	1.85e-06	1.46e-05	4.50678		RRP9	0.376438	5.57012	7.47583	1.61e-13	1.28e-12	19.926		CNIH4	0.273254	7.90464	6.15729	1.05e-09	8.3e-09	11.4861
PEA15	-0.196734	8.66537	-4.79573	1.85e-06	1.47e-05	4.50443		GALNT10	-0.277951	5.91065	-7.47512	1.62e-13	1.28e-12	19.921		FBXO28	0.194906	7.03554	6.15681	1.05e-09	8.32e-09	11.4832
CDK4	0.185611	8.54018	4.79356	1.87e-06	1.48e-05	4.49435		OSR1	-0.707459	5.04789	-7.47379	1.64e-13	1.29e-12	19.9116		PLAC8L1	-0.183721	4.57854	-6.15505	1.07e-09	8.41e-09	11.4729
ITM2A	-0.424255	7.45325	-4.79355	1.87e-06	1.48e-05	4.49434		DUSP22	-0.28944	7.70932	-7.47311	1.64e-13	1.3e-12	19.9068		TBC1D8	-0.241379	6.09951	-6.15436	1.07e-09	8.44e-09	11.4688
CHRDL2	-0.539502	5.75183	-4.79311	1.88e-06	1.48e-05	4.49231		DCUN1D1	0.222093	5.98404	7.4724	1.65e-13	1.3e-12	19.9018		DNAJC4	-0.154774	5.30493	-6.15338	1.08e-09	8.48e-09	11.463
PTN	-0.279754	6.38839	-4.7925	1.88e-06	1.49e-05	4.48945		GABBR1	-0.297928	5.19918	-7.47014	1.68e-13	1.33e-12	19.8858		WDR89	0.143282	5.21311	6.14951	1.1e-09	8.68e-09	11.4402
ENAM	-0.169578	3.60341	-4.79138	1.89e-06	1.49e-05	4.4843		CDC42EP3	-0.450323	5.77218	-7.46976	1.69e-13	1.33e-12	19.8831		ATXN2L	-0.173983	4.69207	-6.14943	1.1e-09	8.68e-09	11.4397
RPUSD4	0.151712	7.85121	4.79129	1.89e-06	1.49e-05	4.48389		DPY19L2	-0.378362	4.27049	-7.46868	1.7e-13	1.34e-12	19.8756		OR3A1	0.174258	3.62865	6.14894	1.11e-09	8.7e-09	11.4369
ABHD14B	-0.228614	6.86787	-4.79101	1.9e-06	1.49e-05	4.48255		GIMAP7	-0.546695	6.66659	-7.46653	1.72e-13	1.36e-12	19.8603		POLG2	0.242262	5.6974	6.14871	1.11e-09	8.71e-09	11.4355
ERMP1	0.228622	6.92776	4.79069	1.9e-06	1.5e-05	4.48112		UCKL1	0.267512	7.16112	7.46293	1.77e-13	1.39e-12	19.835		RANBP6	0.247321	6.28705	6.1486	1.11e-09	8.71e-09	11.4349
SLCO4A1	0.358939	6.0752	4.79057	1.9e-06	1.5e-05	4.48055		WASF3	-0.592877	5.71611	-7.46282	1.77e-13	1.39e-12	19.8342		ATP2B1	0.236851	6.37001	6.14822	1.11e-09	8.73e-09	11.4326
SNRPA	0.141728	7.50472	4.7895	1.91e-06	1.5e-05	4.4756		NOV	-0.523818	5.39376	-7.46261	1.77e-13	1.39e-12	19.8327		SOCS4	0.175349	6.01569	6.14731	1.12e-09	8.77e-09	11.4273
INPP5A	-0.21095	6.60834	-4.78916	1.91e-06	1.5e-05	4.47403		TP53INP2	-0.35079	7.04111	-7.46232	1.78e-13	1.4e-12	19.8306		EHMT1	-0.124157	5.2458	-6.14669	1.12e-09	8.8e-09	11.4236
RASIP1	-0.243085	5.93351	-4.78898	1.92e-06	1.51e-05	4.47321		PHF14	0.233662	6.43895	7.46082	1.8e-13	1.41e-12	19.8201		ARL4C	0.300447	5.89304	6.14555	1.13e-09	8.86e-09	11.4169
C10orf2	0.192742	5.89153	4.78855	1.92e-06	1.51e-05	4.47119		ZNF273	0.18769	4.95939	7.45809	1.83e-13	1.44e-12	19.8009		EGLN1	0.223529	6.04525	6.14524	1.13e-09	8.87e-09	11.4151
DDB2	0.190772	5.91167	4.78818	1.92e-06	1.51e-05	4.46948		TMEM126B	0.22116	7.89327	7.45554	1.87e-13	1.46e-12	19.7829		C7orf43	-0.25135	6.00778	-6.14508	1.13e-09	8.87e-09	11.4141
C10orf88	0.157905	5.76422	4.78723	1.93e-06	1.51e-05	4.46512		PKNOX2	-0.240857	4.6813	-7.45464	1.88e-13	1.47e-12	19.7765		MACROD1	-0.379131	5.71062	-6.14385	1.14e-09	8.93e-09	11.4069
KCNAB1	-0.186875	4.63914	-4.78721	1.93e-06	1.51e-05	4.46501		DLG3	0.246817	5.86031	7.45454	1.88e-13	1.47e-12	19.7758		SAMD8	0.205314	5.27393	6.14279	1.15e-09	8.98e-09	11.4006
NHSL2	0.205966	4.23543	4.78633	1.94e-06	1.52e-05	4.46097		PDE12	0.241193	6.35791	7.45403	1.89e-13	1.48e-12	19.7723		SYDE1	-0.289303	5.63521	-6.14277	1.15e-09	8.98e-09	11.4005
CAPN10	0.173652	4.82108	4.7862	1.94e-06	1.52e-05	4.46035		RAPGEF3	-0.351952	4.90335	-7.45373	1.89e-13	1.48e-12	19.7701		NPDC1	-0.448205	6.46594	-6.14203	1.15e-09	9.02e-09	11.3961
ID4	-0.25396	5.34138	-4.78609	1.94e-06	1.52e-05	4.45986		ANGPT1	-0.409406	5.41128	-7.44912	1.96e-13	1.53e-12	19.7377		DDX23	-0.173001	7.48022	-6.14178	1.16e-09	9.03e-09	11.3947
DHRS3	-0.235781	7.92987	-4.78513	1.95e-06	1.53e-05	4.45539		NR3C1	-0.309795	6.09803	-7.4488	1.96e-13	1.53e-12	19.7354		MGC24103	-0.563077	5.29058	-6.14128	1.16e-09	9.05e-09	11.3917
C12orf29	0.16581	6.93085	4.78242	1.98e-06	1.55e-05	4.4429		IL17RB	0.605164	6.53459	7.44503	2.01e-13	1.57e-12	19.7089		ENO2	-0.458953	6.21518	-6.1401	1.17e-09	9.11e-09	11.3848
PPP2R3A	-0.267823	5.68612	-4.7822	1.98e-06	1.55e-05	4.44186		CHAC2	0.40696	5.83	7.44405	2.03e-13	1.58e-12	19.702		ANKRD13C	0.183177	5.93338	6.13881	1.18e-09	9.18e-09	11.3772
HMGN1	0.172177	9.67601	4.78006	2e-06	1.56e-05	4.43201		BZW1	0.179303	6.88854	7.43972	2.09e-13	1.63e-12	19.6715		OSBP2	-0.313625	4.88562	-6.13764	1.18e-09	9.24e-09	11.3703
ZNF644	0.132289	6.54208	4.77683	2.03e-06	1.59e-05	4.41708		PHF6	0.197425	5.55436	7.43955	2.09e-13	1.63e-12	19.6704		PRPH2	-0.260333	4.85357	-6.13605	1.2e-09	9.32e-09	11.361
GJA4	-0.248503	5.95667	-4.77635	2.04e-06	1.59e-05	4.41489		HPS3	0.294914	6.22658	7.43773	2.12e-13	1.66e-12	19.6576		DHX16	-0.202388	7.57152	-6.135	1.2e-09	9.38e-09	11.3548
TSN	0.183323	6.44477	4.77477	2.05e-06	1.6e-05	4.40759		DGAT2	0.372131	5.89421	7.43747	2.13e-13	1.66e-12	19.6558		ZNF684	0.227376	5.1419	6.13036	1.24e-09	9.64e-09	11.3275
GAS1	-0.481016	6.03079	-4.77453	2.06e-06	1.6e-05	4.40648		TXNDC15	-0.258694	6.92074	-7.43635	2.14e-13	1.67e-12	19.6479		ACTR2	0.173242	8.73786	6.13027	1.24e-09	9.64e-09	11.327
C10orf82	0.274166	4.50462	4.77413	2.06e-06	1.6e-05	4.40465		GNAO1	-0.344649	4.78008	-7.43628	2.14e-13	1.67e-12	19.6474		VAT1	-0.347842	7.20224	-6.12988	1.24e-09	9.66e-09	11.3247
TIGD7	-0.253628	5.14156	-4.77228	2.08e-06	1.62e-05	4.39613		LTV1	0.304083	6.72319	7.4328	2.2e-13	1.71e-12	19.623		NEK2	0.498211	6.65843	6.1296	1.24e-09	9.67e-09	11.3231
PTMA	0.253178	9.42585	4.77194	2.08e-06	1.62e-05	4.39457		DDX20	0.197069	5.71604	7.43154	2.22e-13	1.73e-12	19.6141		RENBP	-0.566654	5.73766	-6.12903	1.25e-09	9.7e-09	11.3197
CNIH4	0.190248	7.90464	4.77124	2.09e-06	1.62e-05	4.39135		ACVRL1	-0.360374	5.73646	-7.42855	2.27e-13	1.76e-12	19.5931		C21orf2	-0.2718	5.57669	-6.1287	1.25e-09	9.71e-09	11.3178
NKX6-3	0.238568	5.24346	4.77108	2.09e-06	1.63e-05	4.39061		RAB7B	-0.345561	5.33504	-7.42696	2.29e-13	1.78e-12	19.582		GNL1	-0.22737	6.1487	-6.12861	1.25e-09	9.71e-09	11.3173
ZCCHC3	0.159289	5.79364	4.76996	2.1e-06	1.63e-05	4.38546		CLEC2B	-0.398123	5.94949	-7.42237	2.37e-13	1.84e-12	19.5497		MRPL35	0.208662	7.07365	6.12737	1.26e-09	9.78e-09	11.31
NIT2	0.162291	7.81601	4.76967	2.11e-06	1.63e-05	4.3841		ATAD3B	0.224014	5.34159	7.4178	2.45e-13	1.9e-12	19.5177		BDH2	0.252468	5.63714	6.1262	1.27e-09	9.85e-09	11.3032
TOP1P2	0.220765	4.94948	4.76932	2.11e-06	1.64e-05	4.38248		TUBGCP3	0.218891	5.36848	7.41725	2.46e-13	1.91e-12	19.5138		SEMA3F	-0.324388	6.01326	-6.12571	1.27e-09	9.87e-09	11.3003
RGS7BP	-0.260161	4.29998	-4.76867	2.12e-06	1.64e-05	4.37951		ZMAT3	-0.408551	7.67881	-7.4171	2.46e-13	1.91e-12	19.5128		ZBTB4	-0.292973	7.65363	-6.12315	1.29e-09	1e-08	11.2852
SIRPG	0.215363	5.11174	4.76716	2.13e-06	1.65e-05	4.37255		ACTC1	-0.581619	5.84136	-7.41249	2.54e-13	1.97e-12	19.4805		LRCH4	-0.303509	6.19342	-6.12235	1.3e-09	1.01e-08	11.2805
ITGA7	-0.360751	5.16597	-4.76706	2.13e-06	1.65e-05	4.3721		PPP2R1B	0.205317	5.66224	7.41011	2.59e-13	2e-12	19.4638		ZNF367	0.31017	5.5852	6.12127	1.31e-09	1.01e-08	11.2742
E2F2	0.279235	6.21644	4.76611	2.14e-06	1.66e-05	4.36773		TMEM123	0.31451	9.48199	7.40784	2.63e-13	2.04e-12	19.4479		SPSB1	-0.301487	6.3233	-6.1196	1.32e-09	1.02e-08	11.2644
GPIHBP1	-0.318701	4.45566	-4.76554	2.15e-06	1.66e-05	4.36509		NOTCH3	-0.406087	6.6562	-7.40759	2.63e-13	2.04e-12	19.4461		SF3A3	-0.215831	7.91633	-6.11678	1.34e-09	1.04e-08	11.2479
PKD2	-0.29285	6.69599	-4.76401	2.16e-06	1.67e-05	4.35808		AFAP1	-0.34473	5.41692	-7.4073	2.64e-13	2.04e-12	19.4441		XPC	-0.214753	7.34243	-6.11364	1.37e-09	1.06e-08	11.2295
HOXD4	0.235966	4.18113	4.76319	2.17e-06	1.68e-05	4.35427		SPECC1L	-0.274918	7.72814	-7.405	2.68e-13	2.08e-12	19.428		CDC73	0.152129	5.89722	6.11363	1.37e-09	1.06e-08	11.2294
RHOQ	-0.226296	8.09578	-4.76226	2.18e-06	1.69e-05	4.35		C1orf109	0.289001	6.40009	7.40375	2.71e-13	2.09e-12	19.4193		CNNM1	-0.309822	4.92777	-6.11257	1.38e-09	1.06e-08	11.2232
SOCS6	0.177335	5.70936	4.76114	2.19e-06	1.69e-05	4.34487		MED4	0.221525	7.24091	7.40351	2.71e-13	2.1e-12	19.4176		CYB5A	0.317976	8.10275	6.11123	1.39e-09	1.07e-08	11.2153
COL18A1	-0.244255	6.95593	-4.76098	2.2e-06	1.7e-05	4.34412		RAB27A	-0.325193	6.52157	-7.40113	2.76e-13	2.13e-12	19.4009		RHOD	-0.483123	6.97059	-6.10986	1.4e-09	1.08e-08	11.2073
HNRNPC	0.123995	7.79209	4.76048	2.2e-06	1.7e-05	4.34181		ZFAND1	0.282793	7.50054	7.40091	2.76e-13	2.13e-12	19.3994		KLHL3	-0.381651	5.41914	-6.10859	1.41e-09	1.09e-08	11.1999
AMBRA1	0.113375	5.24372	4.75949	2.21e-06	1.71e-05	4.33728		DDX11	0.215537	5.26553	7.40065	2.77e-13	2.14e-12	19.3976		TMTC3	0.217075	5.95363	6.10692	1.43e-09	1.1e-08	11.1901
GFPT2	-0.349162	5.5697	-4.75917	2.22e-06	1.71e-05	4.33581		BDH2	-0.277598	5.63714	-7.39943	2.79e-13	2.15e-12	19.389		ACAT2	0.355722	7.07522	6.10608	1.43e-09	1.1e-08	11.1852
MRPL21	0.179689	7.83185	4.75888	2.22e-06	1.71e-05	4.33446		NBL1	-0.444699	8.57985	-7.39756	2.83e-13	2.18e-12	19.3759		XRCC6BP1	0.227783	5.94034	6.10475	1.45e-09	1.11e-08	11.1774
RFWD3	0.210155	6.72953	4.75864	2.22e-06	1.71e-05	4.33338		ACTN1	-0.421937	8.91236	-7.39658	2.85e-13	2.2e-12	19.3691		R3HDML	0.271158	4.06752	6.10466	1.45e-09	1.11e-08	11.1769
PFN2	-0.403258	7.12761	-4.75713	2.24e-06	1.72e-05	4.32646		PRDX1	0.225575	10.2853	7.39504	2.88e-13	2.22e-12	19.3583		DNHD1	-0.195559	4.41154	-6.10426	1.45e-09	1.11e-08	11.1746
BANF2	0.231241	4.03755	4.75663	2.24e-06	1.73e-05	4.32416		PROS1	-0.596698	7.60188	-7.39473	2.89e-13	2.22e-12	19.3561		RPS12	0.13946	11.3541	6.10331	1.46e-09	1.12e-08	11.169
PSME4	0.149316	7.81522	4.75519	2.26e-06	1.74e-05	4.31753		RHEBL1	0.34196	4.7125	7.39458	2.89e-13	2.22e-12	19.3551		PDXK	-0.293457	7.74619	-6.0986	1.5e-09	1.15e-08	11.1415
HIST1H4L	0.227399	4.0111	4.75457	2.27e-06	1.74e-05	4.31468		ATP2C1	0.269769	6.81769	7.39422	2.9e-13	2.23e-12	19.3525		PITRM1	-0.228934	6.71383	-6.09522	1.53e-09	1.18e-08	11.1217
KCNS3	-0.335402	6.39415	-4.75388	2.27e-06	1.75e-05	4.31154		GFRA1	-0.420354	4.65343	-7.39374	2.91e-13	2.23e-12	19.3492		LMBRD1	0.266832	7.6994	6.09415	1.54e-09	1.18e-08	11.1154
MCTS1	0.217269	6.84251	4.75343	2.28e-06	1.75e-05	4.30947		SLC13A3	0.268478	4.45788	7.39313	2.92e-13	2.24e-12	19.3449		CCT6A	0.2341	8.31457	6.09359	1.55e-09	1.19e-08	11.1121
NAP1L2	-0.312417	4.49722	-4.75165	2.3e-06	1.76e-05	4.3013		ILF3	0.204994	7.13489	7.39222	2.94e-13	2.26e-12	19.3386		KLHL22	-0.278657	6.07365	-6.09341	1.55e-09	1.19e-08	11.1111
OLFML3	-0.368407	6.8453	-4.75158	2.3e-06	1.76e-05	4.30096		ELP4	0.237513	6.41616	7.39076	2.97e-13	2.28e-12	19.3284		MYH3	-0.36153	3.97707	-6.09209	1.56e-09	1.2e-08	11.1034
CDX4	0.190193	4.05082	4.75156	2.3e-06	1.76e-05	4.30088		EIF4E	0.245192	5.843	7.38759	3.04e-13	2.33e-12	19.3062		ZNF283	0.256988	4.64625	6.09152	1.57e-09	1.2e-08	11.1001
HAO1	0.191827	3.70696	4.75055	2.31e-06	1.77e-05	4.29625		TIGD2	0.26911	6.32554	7.38578	3.08e-13	2.36e-12	19.2936		MACF1	-0.252716	6.82272	-6.09151	1.57e-09	1.2e-08	11.1
KRT74	0.126857	4.29046	4.7499	2.32e-06	1.77e-05	4.29328		ZNF671	-0.375526	5.32594	-7.38522	3.09e-13	2.37e-12	19.2897		IVNS1ABP	0.269237	7.2666	6.09113	1.57e-09	1.2e-08	11.0978
BRD7	0.12936	7.05183	4.74962	2.32e-06	1.78e-05	4.29198		SDCCAG3	0.213482	6.45264	7.38516	3.09e-13	2.37e-12	19.2892		LRP3	-0.440049	6.53519	-6.09056	1.58e-09	1.2e-08	11.0945
MCC	-0.199646	5.34656	-4.74736	2.35e-06	1.79e-05	4.2816		MAL	-0.684094	5.36477	-7.38472	3.1e-13	2.37e-12	19.2862		PKHD1L1	0.490649	4.23215	6.09004	1.58e-09	1.21e-08	11.0914
DHTKD1	0.17369	6.27628	4.74648	2.36e-06	1.8e-05	4.27757		ADNP	0.239124	7.3751	7.38396	3.12e-13	2.39e-12	19.2809		ZBTB40	-0.235945	6.1682	-6.08988	1.58e-09	1.21e-08	11.0905
PSMD10	0.162144	7.74256	4.74493	2.37e-06	1.81e-05	4.27048		TGFBR1	-0.252595	5.77899	-7.38373	3.13e-13	2.39e-12	19.2793		DENND4A	0.201483	5.6895	6.08866	1.59e-09	1.22e-08	11.0834
RAI14	-0.263804	8.07945	-4.74181	2.41e-06	1.84e-05	4.25617		FES	-0.407848	5.81316	-7.38065	3.19e-13	2.44e-12	19.2577		GJC1	-0.411741	7.48889	-6.08667	1.61e-09	1.23e-08	11.0717
GRK5	-0.212612	6.67298	-4.74063	2.42e-06	1.85e-05	4.2508		TMEM14B	0.30339	8.88637	7.37844	3.25e-13	2.48e-12	19.2423		C16orf54	0.461562	5.23622	6.08598	1.62e-09	1.23e-08	11.0677
CACNA1H	-0.317226	5.53288	-4.74062	2.42e-06	1.85e-05	4.25073		BRMS1	0.240261	7.97752	7.37722	3.27e-13	2.5e-12	19.2338		SORD	0.409529	6.47586	6.08545	1.63e-09	1.24e-08	11.0646
HIGD1B	-0.281851	4.76364	-4.74019	2.43e-06	1.85e-05	4.24878		VGLL3	-0.51024	5.16829	-7.37648	3.29e-13	2.51e-12	19.2286		CAPN3	-0.277621	4.76734	-6.0847	1.63e-09	1.24e-08	11.0602
OAS3	0.289575	6.56218	4.73969	2.43e-06	1.85e-05	4.24646		TRIT1	0.270585	7.03932	7.37562	3.31e-13	2.52e-12	19.2227		C6orf47	-0.232311	6.7141	-6.08253	1.65e-09	1.26e-08	11.0476
BCAS1	-0.529529	6.46091	-4.73968	2.43e-06	1.85e-05	4.24644		STMN2	-0.693896	4.97436	-7.37479	3.33e-13	2.54e-12	19.2169		CHEK2	0.272947	6.0604	6.08213	1.66e-09	1.26e-08	11.0453
IL25	0.218265	4.38805	4.73775	2.46e-06	1.87e-05	4.23759		HNF4A	0.324783	5.18086	7.37314	3.37e-13	2.57e-12	19.2054		FARP2	-0.212149	5.56494	-6.08203	1.66e-09	1.26e-08	11.0447
MT1E	-0.417441	8.72158	-4.73758	2.46e-06	1.87e-05	4.23684		PRDM2	-0.141157	5.25075	-7.37258	3.38e-13	2.58e-12	19.2015		HTATIP2	0.333098	7.94977	6.07955	1.68e-09	1.28e-08	11.0303
BBS1	-0.161272	6.0612	-4.7375	2.46e-06	1.87e-05	4.23644		TINF2	-0.297406	7.6513	-7.37108	3.42e-13	2.6e-12	19.191		ITGA7	-0.512027	5.16597	-6.07921	1.69e-09	1.28e-08	11.0282
MOCS3	0.180929	5.17414	4.73714	2.46e-06	1.87e-05	4.2348		ITSN1	-0.261769	5.75328	-7.36946	3.46e-13	2.63e-12	19.1797		CDC7	0.33427	6.28315	6.07698	1.71e-09	1.3e-08	11.0152
TMEFF2	-0.222233	4.38569	-4.73558	2.48e-06	1.89e-05	4.22769		TEF	-0.273564	5.25592	-7.3679	3.5e-13	2.66e-12	19.1689		LAMA5	-0.423005	8.19798	-6.07663	1.71e-09	1.3e-08	11.0132
HYAL1	-0.471142	5.84045	-4.73516	2.49e-06	1.89e-05	4.22576		DIO2	-0.559987	6.40087	-7.3679	3.5e-13	2.66e-12	19.1689		FYTTD1	0.257753	7.21417	6.07449	1.74e-09	1.32e-08	11.0008
ALDH3B2	0.324445	4.27515	4.73444	2.5e-06	1.9e-05	4.22245		NR2C2AP	0.267799	6.5866	7.36343	3.61e-13	2.74e-12	19.1377		AHI1	-0.282683	6.01303	-6.07436	1.74e-09	1.32e-08	11
NLRX1	-0.149685	6.17184	-4.73284	2.52e-06	1.91e-05	4.21516		GREM1	-0.92255	8.29681	-7.35915	3.72e-13	2.83e-12	19.1079		CCNYL1	0.247174	6.22832	6.07403	1.74e-09	1.32e-08	10.998
FMNL3	-0.147214	4.87147	-4.73251	2.52e-06	1.91e-05	4.21365		MTX1	0.236792	7.41899	7.35856	3.74e-13	2.84e-12	19.1038		TRIM8	-0.210484	7.62524	-6.07106	1.77e-09	1.34e-08	10.9808
COG3	0.168601	6.13238	4.73068	2.54e-06	1.93e-05	4.2053		ZNF326	0.172097	5.14585	7.35819	3.75e-13	2.84e-12	19.1012		ZAN	0.178876	4.14272	6.06734	1.81e-09	1.37e-08	10.9591
CHAF1A	0.164859	5.44028	4.73053	2.54e-06	1.93e-05	4.20459		XPOT	0.347577	6.75632	7.35709	3.78e-13	2.86e-12	19.0936		RIPK2	0.315726	7.32132	6.06725	1.81e-09	1.37e-08	10.9586
NUP50	0.147487	5.98965	4.73026	2.55e-06	1.93e-05	4.20336		ARHGAP28	-0.293735	4.39705	-7.35659	3.79e-13	2.87e-12	19.0901		GNPTG	-0.230521	7.36004	-6.06667	1.82e-09	1.38e-08	10.9552
POLR2K	0.145623	6.86928	4.72952	2.56e-06	1.93e-05	4.19997		CERK	-0.304916	7.30555	-7.35542	3.82e-13	2.89e-12	19.0819		CYGB	-0.361221	6.51947	-6.06664	1.82e-09	1.38e-08	10.955
SUGT1	0.166915	7.14528	4.72946	2.56e-06	1.93e-05	4.19972		SURF6	0.280289	7.43538	7.35378	3.87e-13	2.93e-12	19.0705		FAM45A	0.275098	5.16586	6.06458	1.84e-09	1.39e-08	10.9431
ABI3BP	-0.45584	6.04268	-4.72941	2.56e-06	1.93e-05	4.19945		SHC4	-0.36065	4.53245	-7.35325	3.88e-13	2.94e-12	19.0668		CSRP1	-0.500215	9.14435	-6.06423	1.85e-09	1.39e-08	10.941
LOXHD1	0.152772	3.83213	4.72821	2.57e-06	1.94e-05	4.194		POLR1B	0.223312	6.01228	7.352	3.92e-13	2.96e-12	19.0581		TMEM209	0.22378	6.71398	6.06421	1.85e-09	1.39e-08	10.9409
PHKB	-0.134793	6.52751	-4.72812	2.57e-06	1.94e-05	4.19357		ZYG11B	-0.23829	7.74296	-7.34945	3.99e-13	3.01e-12	19.0404		PHKG2	-0.222115	5.16284	-6.06361	1.85e-09	1.4e-08	10.9374
OR51B6	0.165367	4.08986	4.72658	2.59e-06	1.96e-05	4.18658		ZNF670	0.295525	5.0255	7.34264	4.19e-13	3.16e-12	18.993		PTPN11	0.214578	7.70619	6.06349	1.85e-09	1.4e-08	10.9367
SMARCA5	0.163098	7.00667	4.72628	2.6e-06	1.96e-05	4.18519		FTO	-0.270328	6.72261	-7.34002	4.27e-13	3.22e-12	18.9748		RAB12	-0.27738	5.50318	-6.06105	1.88e-09	1.42e-08	10.9226
CRNKL1	0.154312	6.46356	4.72623	2.6e-06	1.96e-05	4.18495		ATAD5	0.246334	4.90627	7.33951	4.28e-13	3.23e-12	18.9713		MMAA	0.210591	5.18482	6.05936	1.9e-09	1.43e-08	10.9127
MAGED1	-0.283435	8.49356	-4.72541	2.61e-06	1.97e-05	4.1812		HSPA12A	-0.345433	4.96887	-7.3388	4.3e-13	3.24e-12	18.9664		PDE6D	0.205013	6.34446	6.05806	1.92e-09	1.44e-08	10.9052
LDHC	0.239256	4.50723	4.72495	2.61e-06	1.97e-05	4.17913		GPATCH4	0.257779	6.20233	7.33795	4.33e-13	3.26e-12	18.9605		PRPF19	-0.22027	7.72967	-6.05768	1.92e-09	1.44e-08	10.903
NUP88	0.140095	7.51338	4.7235	2.63e-06	1.98e-05	4.17248		WDR3	0.190698	5.46493	7.33746	4.35e-13	3.27e-12	18.9571		KLHL7	0.240613	6.22828	6.05695	1.93e-09	1.45e-08	10.8988
DPAGT1	0.158312	7.41505	4.7208	2.67e-06	2.01e-05	4.16018		SCML2	0.26093	6.22575	7.33614	4.39e-13	3.3e-12	18.9479		EHHADH	0.393319	6.00547	6.05516	1.95e-09	1.47e-08	10.8883
NFASC	-0.221271	4.63772	-4.71829	2.7e-06	2.03e-05	4.14873		LBH	-0.372805	6.61917	-7.33291	4.49e-13	3.38e-12	18.9255		CD1D	0.320523	5.05673	6.05489	1.95e-09	1.47e-08	10.8867
SLC17A1	0.166579	3.69664	4.7173	2.71e-06	2.04e-05	4.14424		MRPL37	0.243936	8.60059	7.33258	4.5e-13	3.38e-12	18.9232		TTC30B	0.274231	5.1697	6.05347	1.97e-09	1.48e-08	10.8785
NEDD1	0.13371	6.05633	4.71636	2.72e-06	2.05e-05	4.13994		MID2	-0.29843	5.43667	-7.33061	4.56e-13	3.43e-12	18.9096		MTG1	-0.279696	6.26043	-6.05273	1.98e-09	1.48e-08	10.8742
LRFN5	-0.285124	4.49245	-4.71544	2.74e-06	2.05e-05	4.13578		GJC1	-0.451352	7.48889	-7.32936	4.6e-13	3.46e-12	18.9009		RBBP9	0.212549	5.87381	6.05147	1.99e-09	1.5e-08	10.8669
GRIK1	0.146412	3.96717	4.71539	2.74e-06	2.05e-05	4.13552		RRAGA	-0.272323	8.74255	-7.32919	4.61e-13	3.46e-12	18.8997		LEO1	0.204367	6.58029	6.05096	2e-09	1.5e-08	10.8639
PSMA7	0.14319	6.87586	4.71402	2.76e-06	2.07e-05	4.12931		AP1S1	0.37665	6.9287	7.32879	4.62e-13	3.47e-12	18.897		NDUFA12	0.219396	9.24291	6.04937	2.02e-09	1.51e-08	10.8547
[truncated: 4,492 more rows]
