# Supplementary material for: Cross-talk of RNA modification "writers" describes tumor stemness and microenvironment and guides personalized immunotherapy for gastric cancer
Source: Aging (Albany NY). 2023 Jun 14;15(12):5445–81. doi: 10.18632/aging.204802 (PMC10333070; doi:10.18632/aging.204802)
Supplement: Supplementary Table 14 [file aging-15-204802-s015.xlsx]

## Sheet: Sheet1
Supplementary Table 14. KEGG enrichment analysis of the overlapped 1801 RNA modification patterns related genes.
ID	Description	GeneRatio	BgRatio	p-value	geneID	Count
hsa04110	Cell cycle	33/768	126/8142	3.45658e-08	CCNH/MAD2L1/PCNA/ABL1/STAG2/RB1/E2F5/HDAC2/TFDP1/CDK7/SMC3/MYC/CCNE2/CHEK1/CCNB1/RAD21/CCNA2/BUB3/YWHAQ/BUB1/CHEK2/CDC7/YWHAB/CDC23/YWHAE/BUB1B/SKP2/TTK/CDC25C/CCNB2/PTTG1/CDK2/MCM6	33
hsa03420	Nucleotide excision repair	15/768	47/8142	1.52971e-05	CCNH/PCNA/ERCC8/RFC3/RFC5/RPA3/MNAT1/RFC4/CDK7/GTF2H1/RFC2/POLE2/XPC/GTF2H3/CUL4A	15
hsa03013	Nucleocytoplasmic transport	25/768	108/8142	1.70994e-05	NXT2/NUP35/NUP54/NUP37/RAN/NCBP1/KPNA2/NUP160/NCBP2/SUMO1/TMEM33/NUP107/NXF1/KPNA3/XPOT/NUP155/NUP98/THOC7/NUP50/SEH1L/NUP88/NUP205/CSE1L/EIF4A3/XPO4	25
hsa03050	Proteasome	14/768	46/8142	5.32944e-05	PSMA3/PSMA4/PSMA1/PSMD14/POMP/PSMC6/PSMA2/IFNG/PSMB9/PSME1/PSMD11/PSMB8/PSMC4/PSMD13	14
hsa03030	DNA replication	12/768	36/8142	6.74927e-05	PRIM1/PCNA/RFC3/RFC5/RPA3/RFC4/PRIM2/RNASEH2B/RFC2/POLE2/MCM6/FEN1	12
hsa03430	Mismatch repair	9/768	23/8142	0.00013653	PCNA/MSH2/RFC3/RFC5/RPA3/RFC4/MSH6/RFC2/EXO1	9
hsa04218	Cellular senescence	29/768	156/8142	0.000267054	NBN/RB1/E2F5/MAP2K6/MYC/CCNE2/RAF1/MAPK3/CHEK1/CCNB1/CCNA2/PPID/NFATC4/RRAS/CHEK2/RAD1/LIN9/PIK3CB/NRAS/TSC1/MAPK14/TGFBR1/TGFBR2/LIN54/CCNB2/MYBL2/CDK2/PPP3CB/MRAS	29
hsa03022	Basal transcription factors	12/768	45/8142	0.000700515	CCNH/MNAT1/CDK7/GTF2H1/GTF2A2/GTF2F2/GTF2I/TAF8/GTF2H3/TBPL1/TAF5/TAF5L	12
hsa04114	Oocyte meiosis	23/768	131/8142	0.00244607	MAD2L1/PPP2R5B/ADCY9/PPP2R1B/ADCY4/SMC3/CCNE2/MAPK3/RPS6KA2/CCNB1/FBXO5/YWHAQ/BUB1/YWHAB/CDC23/YWHAE/MAPK14/IGF1R/CDC25C/CCNB2/PTTG1/CDK2/PPP3CB	23
hsa03040	Spliceosome	25/768	147/8142	0.00254772	PRPF18/LSM6/CDC40/DHX15/SMNDC1/CDC5L/LSM5/NCBP1/SNW1/NCBP2/SNRPD1/PPIL1/SNRPF/PRPF40A/PRPF19/SNRPE/SNRPC/SNRPA/PRPF38A/PRPF6/SNRPB2/PPIH/CRNKL1/HNRNPC/EIF4A3	25
hsa04914	Progesterone-mediated oocyte maturation	19/768	102/8142	0.00285037	MAD2L1/GNAI3/ADCY9/ADCY4/RAF1/MAPK3/RPS6KA2/CCNB1/HSP90AA1/CCNA2/BUB1/CDC23/PIK3CB/MAPK14/GNAI2/IGF1R/CDC25C/CCNB2/CDK2	19
hsa00230	Purine metabolism	22/768	128/8142	0.00393539	DCK/ADCY9/PGM2/ADCY4/PRPS2/RRM2/NUDT5/HPRT1/ADK/NPR2/AK2/PDE8B/PPAT/PDE2A/PRPS1L1/GART/RRM1/AK7/PAICS/NME1/GUCY1A2/PDE1C	22
hsa05161	Hepatitis B	26/768	162/8142	0.00476074	PCNA/RB1/CASP8/IFIH1/MAP2K6/MYC/CCNE2/RAF1/MAPK3/CCNA2/YWHAQ/NFATC4/APAF1/BID/HSPG2/YWHAB/PIK3CB/IFNA5/STAT1/NRAS/CHUK/MAPK14/CASP10/TGFBR1/TGFBR2/CDK2	26
hsa04520	Adherens junction	14/768	71/8142	0.00581592	ACP1/MAPK3/ACTN1/WASF2/NLK/PTPRM/MET/CSNK2A1/TGFBR1/TGFBR2/ACTB/IGF1R/SORBS1/VCL	14
hsa05235	PD-L1 expression and PD-1 checkpoint pathway in cancer	16/768	89/8142	0.00839786	MAP2K6/MAP3K3/RAF1/MAPK3/IFNG/PRKCQ/PTPN11/PIK3CB/STAT1/NRAS/CSNK2A1/CHUK/CD274/MAPK14/EML4/PPP3CB	16
hsa03015	mRNA surveillance pathway	17/768	97/8142	0.00867782	NUDT21/NXT2/PPP2R5B/RNGTT/PPP2R1B/NCBP1/CLP1/PAPOLA/CSTF1/NCBP2/NXF1/CSTF2/PPP2R3A/CPSF3/EIF4A3/CPSF2/WDR82	17
hsa04360	Axon guidance	27/768	182/8142	0.0116449	ABL1/GNAI3/RAF1/MAPK3/PLXNB2/NFATC4/RRAS/SEMA4C/PTPN11/PTCH1/PIK3CB/NRAS/SLIT3/MET/NTN1/PAK3/TRPC1/UNC5B/ABLIM3/PARD6B/BOC/ILK/GNAI2/FES/RGMA/EFNA5/PPP3CB	27
hsa05160	Hepatitis C	24/768	157/8142	0.0118284	RB1/CASP8/RXRA/PPP2R1B/MYC/OCLN/RAF1/MAPK3/IFNG/CXCL10/YWHAQ/APAF1/BID/YWHAB/YWHAE/PIK3CB/IFNA5/STAT1/NRAS/CHUK/TNFRSF1A/OAS3/CLDN5/CDK2	24
hsa05166	Human T-cell leukemia virus 1 infection	31/768	222/8142	0.016623	MAD2L1/RB1/RANBP1/RAN/ADCY9/ADCY4/DLG1/MYC/CCNE2/MAP3K3/MAPK3/CHEK1/ICAM1/CCNA2/BUB3/NFATC4/CHEK2/CDC23/PIK3CB/TBPL1/NRAS/BUB1B/CHUK/TNFRSF1A/TGFBR1/TGFBR2/CCNB2/MSX2/PTTG1/CDK2/PPP3CB	31
hsa04540	Gap junction	15/768	88/8142	0.0168535	GNA11/GNAI3/ADCY9/ADCY4/RAF1/MAPK3/MAPK7/NRAS/PDGFRB/PDGFC/DRD2/GNAI2/GRM5/GUCY1A2/GJD2	15
hsa04115	p53 signaling pathway	13/768	73/8142	0.0178696	RCHY1/CASP8/PMAIP1/CCNE2/CHEK1/CCNB1/RRM2/APAF1/CHEK2/BID/CCNB2/CDK2/RPRM	13
hsa01523	Antifolate resistance	7/768	30/8142	0.0191323	DHFR/GGH/ABCC4/TYMS/ABCC5/GART/CHUK	7
hsa04730	Long-term depression	11/768	60/8142	0.0230283	GNA11/GNAI3/PPP2R1B/RAF1/MAPK3/NRAS/GNAO1/GNAI2/IGF1R/GUCY1A2/GNA12	11
hsa05220	Chronic myeloid leukemia	13/768	76/8142	0.0243833	ABL1/RB1/HDAC2/MYC/RAF1/MAPK3/SHC2/PTPN11/PIK3CB/NRAS/CHUK/TGFBR1/TGFBR2	13
hsa05170	Human immunodeficiency virus 1 infection	29/768	212/8142	0.0257986	GNA11/GNAI3/CASP8/MAP2K6/RAF1/MAPK3/CHEK1/CCNB1/NFATC4/PDIA3/GNB1/AP1M1/BID/PIK3CB/IFNA5/NRAS/AP1S1/GNG3/CHUK/MAPK14/PAK3/TAP2/GNAO1/TNFRSF1A/GNAI2/CDC25C/CCNB2/CUL4A/PPP3CB	29
hsa05211	Renal cell carcinoma	12/768	69/8142	0.0265445	FH/RAPGEF1/RAF1/MAPK3/EGLN1/PTPN11/PIK3CB/NRAS/MET/CUL2/TFE3/PAK3	12
hsa05100	Bacterial invasion of epithelial cells	13/768	77/8142	0.0269022	ARPC5/CD2AP/WASF2/SHC2/CAV3/PIK3CB/MET/ITGA5/ACTR3B/ILK/ACTB/CLTB/VCL	13
hsa03460	Fanconi anemia pathway	10/768	54/8142	0.0276435	USP1/RPA3/FANCM/UBE2T/BRIP1/FANCI/BRCA2/FANCF/RMI1/FANCB	10
hsa04722	Neurotrophin signaling pathway	18/768	119/8142	0.0295327	ABL1/SH2B1/PSEN1/RAPGEF1/MAP3K3/RAF1/MAPK3/RPS6KA2/SHC2/MAPK7/RIPK2/PTPN11/YWHAE/PIK3CB/NRAS/MAPK14/ZNF274/NTF3	18
hsa04625	C-type lectin receptor signaling pathway	16/768	104/8142	0.033709	CASP8/MALT1/CLEC4E/RAF1/MAPK3/NFATC4/RRAS/PTPN11/PIK3CB/STAT1/NRAS/CBLB/CHUK/MAPK14/PPP3CB/MRAS	16
hsa00670	One carbon pool by folate	5/768	20/8142	0.0345224	DHFR/MTHFD2/TYMS/MTFMT/GART	5
hsa03440	Homologous recombination	8/768	41/8142	0.0351154	NBN/RPA3/BRIP1/BRCA2/RAD54B/TOPBP1/BRCC3/RBBP8	8
hsa00520	Amino sugar and nucleotide sugar metabolism	9/768	49/8142	0.0374166	CYB5R4/PGM3/PGM2/UXS1/HK1/CYB5R1/PMM1/NANP/CYB5R3	9
hsa04015	Rap1 signaling pathway	28/768	210/8142	0.0376168	GNAI3/RAPGEF1/ADCY9/MAP2K6/ADCY4/RAF1/MAPK3/RRAS/RAPGEF3/PIK3CB/FGF4/NRAS/MET/PDGFRB/PDGFC/MAPK14/PARD6B/GNAO1/DRD2/FGF6/GNAI2/GRIN2B/ACTB/IGF1R/EVL/RASGRP2/EFNA5/MRAS	28
hsa05169	Epstein-Barr virus infection	27/768	202/8142	0.0395815	PSMD14/RB1/PSMC6/CASP8/HDAC2/MAP2K6/SNW1/MYC/CCNE2/CXCL10/ICAM1/CCNA2/PDIA3/APAF1/BID/PIK3CB/IFNA5/STAT1/PSMD11/CHUK/MAPK14/TAP2/SKP2/PSMC4/OAS3/PSMD13/CDK2	27
hsa04010	MAPK signaling pathway	37/768	294/8142	0.0414052	CACNB3/MAP2K6/MAPKAPK5/MKNK2/MYC/MAP3K3/RAF1/MAPK3/RPS6KA2/CACNA1H/RRAS/MAPK7/NLK/JUND/FGF4/NRAS/DUSP2/MET/PDGFRB/PDGFC/CHUK/MAPK14/PPP5C/STK3/TNFRSF1A/FGF6/TGFBR1/TGFBR2/IGF1R/GNA12/HSPB1/STMN1/RASGRP2/EFNA5/PPP3CB/NTF3/MRAS	37
hsa00510	N-Glycan biosynthesis	9/768	50/8142	0.04197	DPM1/ALG5/STT3B/ALG14/ALG6/MGAT1/STT3A/ALG8/RPN2	9
hsa00240	Pyrimidine metabolism	10/768	58/8142	0.042977	DCK/TYMS/RRM2/TK2/UMPS/RRM1/ASMTL/NME1/DUT/DTYMK	10
hsa05132	Salmonella infection	32/768	249/8142	0.0432072	PLEKHM2/ARPC5/SNX33/VPS39/ABI1/CASP8/MAP2K6/MYC/ARF6/RAF1/ACTR1A/MAPK3/HSP90AA1/RAB5B/KPNA3/FBXO22/DYNC1LI2/RRAS/RIPK2/PIK3CB/RAB9B/CHUK/MAPK14/PAK3/ACTR3B/TNFRSF1A/CASP5/CYFIP2/CSE1L/ACTB/RAB7B/FYCO1	32
hsa00730	Thiamine metabolism	4/768	15/8142	0.0461641	ACP1/AK2/AK7/NFS1	4
