# Supplementary material for: Cross-talk of RNA modification "writers" describes tumor stemness and microenvironment and guides personalized immunotherapy for gastric cancer
Source: Aging (Albany NY). 2023 Jun 14;15(12):5445–81. doi: 10.18632/aging.204802 (PMC10333070; doi:10.18632/aging.204802)
Supplement: Supplementary Table 15 [file aging-15-204802-s016.xlsx]

## Sheet: Sheet1
Supplementary Table 15. The highly correlated genes and the colors of the modules they're in.
Gene	Module color
CFI	blue
PDCD10	blue
BRD3	blue
FAM96A	blue
MITD1	blue
MRPS18C	blue
NMI	blue
COMMD8	blue
TBC1D13	blue
PSMA3	blue
PLEKHM2	blue
TMEM14B	blue
EEF1E1	blue
PACS2	blue
LSM6	blue
PIP5K1C	blue
MRPL13	blue
CLSTN1	blue
TXNDC9	blue
KCTD2	blue
ABL1	blue
PPP2R5B	blue
NISCH	blue
GAK	blue
PPP1R3E	blue
TMEM184B	blue
GPD2	blue
MRPL50	blue
CLCN6	blue
MYO1C	blue
SH2B1	blue
EIF3J	blue
PSMA4	blue
ULK1	blue
MUM1	blue
NUP35	blue
PNPLA6	blue
ACADVL	blue
DNAJB2	blue
GCA	blue
CCM2	blue
GOLGA8A	blue
TPRKB	blue
PSMA1	blue
MPHOSPH6	blue
ECHDC2	blue
VGLL4	blue
IQSEC1	blue
LZTR1	blue
METTL5	blue
CACNB3	blue
SGSM2	blue
SPTAN1	blue
SGSH	blue
MAPKBP1	blue
MTX2	blue
PSMD14	blue
SNX33	blue
C14orf142	blue
DLG4	blue
AAK1	blue
POMP	blue
UNC45A	blue
ARHGEF17	blue
MNT	blue
MYO9A	blue
DIP2C	blue
RANBP1	blue
RPA3	blue
VPS39	blue
MRPL15	blue
FAM89B	blue
MST4	blue
TFEC	blue
BCL2A1	blue
ST6GALNAC6	blue
HSPE1	blue
ABCD3	blue
ALG5	blue
PIGF	blue
UCHL3	blue
RAPGEF1	blue
TRMT61A	blue
CASP8	blue
PHF2	blue
LSM5	blue
LZTS2	blue
XRCC4	blue
TIMM17A	blue
FARP1	blue
NFE2L1	blue
CDC42BPA	blue
MAP1LC3A	blue
PRDM2	blue
MRPS28	blue
SARM1	blue
ARMCX4	blue
ST5	blue
CUEDC1	blue
ABHD14B	blue
ADCY9	blue
TCEB1	blue
SPSB3	blue
RXRA	blue
CD2AP	blue
MAP2K6	blue
ROGDI	blue
GRASP	blue
GPR153	blue
CAMTA2	blue
LYSMD2	blue
ZNF362	blue
TESK1	blue
GARNL3	blue
PPA1	blue
CCL18	blue
MBD2	blue
NFIC	blue
LPPR2	blue
SLC35E1	blue
KIAA0556	blue
RABGAP1	blue
GLT1D1	blue
GATS	blue
CCDC92	blue
SHANK3	blue
GABBR1	blue
C18orf21	blue
ADCY4	blue
CHAC2	blue
MEG3	blue
TPCN1	blue
SCMH1	blue
GRK4	blue
STOML1	blue
RNF185	blue
SETD1B	blue
CDK7	blue
NOTCH3	blue
MED30	blue
RAP2C	blue
FBXW4	blue
MRPL18	blue
OSBPL5	blue
VPS13D	blue
ORAI3	blue
CASP6	blue
SNTA1	blue
PSMA2	blue
LEPRE1	blue
MCTS1	blue
SPECC1L	blue
ARF6	blue
OCLN	blue
GOLGA1	blue
LTBP4	blue
IL11RA	blue
SH3PXD2A	blue
ZNF827	blue
C1GALT1C1	blue
MRPL16	blue
CRELD1	blue
MAP3K3	blue
CLEC4E	blue
MEF2D	blue
IDI1	blue
AFAP1	blue
SLC27A1	blue
ABHD4	blue
GTF2A2	blue
LEPREL2	blue
EIF3M	blue
C14orf1	blue
ACTR1A	blue
MAP4	blue
NDUFAB1	blue
ACTN1	blue
USP11	blue
SIX5	blue
AKAP13	blue
GLG1	blue
RPS6KA2	blue
DBI	blue
IL4R	blue
TUBG2	blue
NOTCH4	blue
LCAT	blue
PHF1	blue
CD80	blue
SCAMP2	blue
ADD1	blue
HCFC1R1	blue
ZFPM1	blue
KCNK13	blue
MRPL32	blue
METAP2	blue
WASF2	blue
PPM1F	blue
MGST1	blue
SLC25A34	blue
ZNF358	blue
RING1	blue
ALG14	blue
MAP1A	blue
HPSE	blue
TSPAN6	blue
HECTD3	blue
PBXIP1	blue
DFNB31	blue
CHST3	blue
PSMB9	blue
SUMO1	blue
ARHGEF10	blue
SNRPD1	blue
TBC1D17	blue
TSPYL2	blue
WFS1	blue
TWISTNB	blue
COL18A1	blue
ASCC2	blue
GAS6	blue
MATR3	blue
SMARCD3	blue
NLRX1	blue
RNF216	blue
GLI3	blue
MFGE8	blue
RAB11FIP5	blue
POLR2K	blue
FAM20C	blue
TIMM8B	blue
MRPL1	blue
DPY30	blue
TENC1	blue
RAB5B	blue
TARP	blue
DCLK2	blue
MYH9	blue
STK16	blue
SHC2	blue
NR1H2	blue
LAMB2	blue
CISD2	blue
MAN2B1	blue
SLC30A4	blue
PLXNB2	blue
PLVAP	blue
GBF1	blue
ASPH	blue
LRCH3	blue
SPRYD3	blue
CACNA1H	blue
STUB1	blue
ADK	blue
HRSP12	blue
MMP12	blue
SUSD2	blue
ENOPH1	blue
COL6A2	blue
C8orf59	blue
CYSLTR2	blue
ZBTB47	blue
CCDC58	blue
MTMR9	blue
PCDHGA9	blue
NPHP3	blue
LTBP3	blue
TRIM52	blue
OLFML2A	blue
COQ2	blue
EFEMP2	blue
TGFB1I1	blue
VASN	blue
HELZ	blue
DYNC1LI2	blue
NPR2	blue
GALNT11	blue
CLIP3	blue
TNRC6B	blue
TREM1	blue
DTX3	blue
ZNF460	blue
LZTS1	blue
NFATC4	blue
LRRC8A	blue
C1orf198	blue
FOXJ2	blue
MRPL11	blue
TMEM91	blue
ZNRF2	blue
ACACB	blue
MYOM1	blue
DPY19L2	blue
MVP	blue
ZMAT1	blue
SORBS3	blue
ATP5S	blue
PDIA3	blue
THSD4	blue
SLC25A23	blue
ANKDD1A	blue
EMILIN1	blue
PALM	blue
CTSO	blue
TP53INP2	blue
HSPA12A	blue
PTGIR	blue
EEF2	blue
NLGN2	blue
PACS1	blue
TMEM127	blue
SLC27A2	blue
SEMA4C	blue
GPR124	blue
NAV1	blue
PPP2R3A	blue
CBX6	blue
MAPK7	blue
CKS1B	blue
CORO6	blue
CXCL3	blue
CKB	blue
PPP1R9A	blue
C1orf43	blue
DENND2A	blue
DMPK	blue
USP4	blue
SNRPF	blue
PLCD1	blue
SPOP	blue
HOXB4	blue
HMBOX1	blue
IDH1	blue
SCUBE2	blue
CSPG4	blue
ASB1	blue
CNIH4	blue
SYDE1	blue
PRPH2	blue
MRPL35	blue
ZBTB4	blue
SPSB1	blue
XPC	blue
KLHL3	blue
XRCC6BP1	blue
MACF1	blue
ITGA7	blue
TRIM8	blue
CYGB	blue
CSRP1	blue
ZNF781	blue
EVX1	blue
LUZP1	blue
AP1M1	blue
NFASC	blue
FAM65A	blue
BID	blue
HSPG2	blue
CDH6	blue
ZNF605	blue
CTDSP1	blue
ITGA10	blue
APCDD1L	blue
PRICKLE1	blue
GLRX2	blue
RAPGEF3	blue
PSME1	blue
NECAB1	blue
SNRPE	blue
LOXL1	blue
EBPL	blue
KIF13B	blue
TNS1	blue
AMOTL1	blue
TIMM13	blue
CCDC106	blue
ZBTB20	blue
NR2F1	blue
ZNF516	blue
ARHGEF18	blue
ZFHX3	blue
GFER	blue
FZD4	blue
R3HCC1	blue
COPZ2	blue
SH3BGRL	blue
PTMA	blue
PDE8B	blue
NXN	blue
LDHA	blue
FHOD3	blue
CBX7	blue
HAGH	blue
STOX2	blue
KIAA0355	blue
FAM109B	blue
CD99L2	blue
PBX1	blue
RIMS3	blue
PTCH1	blue
PPP1R14A	blue
GK	blue
APOO	blue
ZNF138	blue
CD248	blue
CCL20	blue
BCAS3	blue
SNRPC	blue
ZFYVE1	blue
TRO	blue
GATA2	blue
CALCOCO1	blue
TK2	blue
LIMS2	blue
GAD1	blue
A4GALT	blue
PCDH17	blue
TBC1D9	blue
C15orf52	blue
SIDT2	blue
CERK	blue
LPP	blue
NFIX	blue
PLXDC1	blue
ITPKB	blue
TARSL2	blue
TEC	blue
PHC2	blue
MEFV	blue
RNF150	blue
ADAM33	blue
PTPRM	blue
C2CD2	blue
RAB9B	blue
GDF11	blue
STAB1	blue
C17orf47	blue
SLC22A17	blue
ZNF10	blue
AVPR2	blue
CORO2B	blue
KLHDC1	blue
GRHL1	blue
KANK2	blue
COL16A1	blue
SOBP	blue
TSPAN9	blue
PDE2A	blue
BGN	blue
SLIT3	blue
POF1B	blue
FBXL22	blue
AP1S1	blue
PRAF2	blue
WWC3	blue
SERP2	blue
ME3	blue
SMTN	blue
CHCHD2	blue
MET	blue
PSMB8	blue
HSPA12B	blue
CLN8	blue
HEYL	blue
PDGFRB	blue
MGAT1	blue
UXS1	blue
FAM127A	blue
KLF5	blue
MRC2	blue
ATP1B3	blue
SIRPG	blue
GPBAR1	blue
INHBE	blue
LSAMP	blue
MYL6	blue
HK1	blue
ITGA5	blue
TFE3	blue
N4BP1	blue
MAD2L1BP	blue
POLR2G	blue
CBLB	blue
THY1	blue
SETBP1	blue
TTLL7	blue
DLL1	blue
FAM101B	blue
DAAM2	blue
SNRPA	blue
DOK6	blue
LXN	blue
MLXIP	blue
USP43	blue
CCDC3	blue
TCF4	blue
MPZL3	blue
CTSF	blue
ZNF540	blue
PEX13	blue
CTDSPL	blue
PDAP1	blue
KIRREL	blue
C11orf68	blue
MRPL21	blue
THOC7	blue
FAM120B	blue
MID2	blue
PDGFC	blue
CNTNAP1	blue
AEBP1	blue
NTN1	blue
MREG	blue
ZMIZ1	blue
DTNA	blue
SELM	blue
C14orf159	blue
DUSP26	blue
TCEAL3	blue
SYNGR1	blue
C12orf45	blue
ZBTB16	blue
LRRC32	blue
SNRPB2	blue
PRKCDBP	blue
ZNF471	blue
TXNDC11	blue
HOXA2	blue
RASL12	blue
PPIH	blue
C9orf43	blue
AQP11	blue
BTBD8	blue
PCYOX1	blue
CERCAM	blue
PAK3	blue
PPM1M	blue
PLCXD2	blue
TRPC1	blue
AP2M1	blue
PDPR	blue
UNC5B	blue
ICA1L	blue
SEPW1	blue
CASP10	blue
TAP2	blue
KCTD15	blue
KIAA0513	blue
AK7	blue
CPA3	blue
HOXA5	blue
ABHD8	blue
REEP1	blue
OXSM	blue
ABLIM3	blue
SNHG10	blue
YKT6	blue
PLEKHH2	blue
PARD6B	blue
GLI2	blue
COL5A1	blue
RILPL1	blue
PSTK	blue
PTRF	blue
WFDC1	blue
SCRN1	blue
TNKS1BP1	blue
ZNF211	blue
CAMLG	blue
MRVI1	blue
GNAO1	blue
BOLA3	blue
XKRX	blue
FOXN3	blue
MECP2	blue
BOC	blue
ZNRD1	blue
VEZF1	blue
PODN	blue
HIVEP3	blue
LARGE	blue
FEZ1	blue
C8orf76	blue
HIST1H3F	blue
NUAK1	blue
RBPMS2	blue
RASIP1	blue
HOXA4	blue
LMO3	blue
CCDC136	blue
ASMTL	blue
TBC1D2B	blue
DUSP22	blue
WDR88	blue
NME1	blue
FNDC5	blue
BDKRB1	blue
ACVRL1	blue
MEF2A	blue
RUNX1T1	blue
ILK	blue
POLR3K	blue
EHD2	blue
CXCL1	blue
ROR2	blue
SH2D3C	blue
TCTN1	blue
CCDC107	blue
LONRF2	blue
BBS4	blue
IL32	blue
FMNL3	blue
PHLDA3	blue
MYOCD	blue
PEG3	blue
TNFRSF1A	blue
ATAD3A	blue
EVC	blue
NHSL2	blue
TMEM35	blue
CRIP2	blue
PEA15	blue
SSSCA1	blue
SEC31A	blue
MRPL55	blue
VWF	blue
IGFBP4	blue
PCOLCE	blue
TGFBR1	blue
LY6G6C	blue
PDZD2	blue
GPR162	blue
TEF	blue
ZNF385D	blue
FXYD6	blue
FOXF2	blue
C20orf194	blue
LOXL4	blue
ZEB2	blue
EFHD1	blue
GNAI2	blue
WTIP	blue
CASP5	blue
KCNIP2	blue
TIMM9	blue
MXRA8	blue
RPS7	blue
ZSCAN18	blue
PEAR1	blue
GEMIN7	blue
PSMC4	blue
ARHGAP1	blue
ARL2BP	blue
FGD5	blue
TGFBR2	blue
ZYG11B	blue
IGFBP6	blue
FBXL2	blue
BVES	blue
ADHFE1	blue
LRRC37A2	blue
VAMP2	blue
PES1	blue
COL8A1	blue
CYFIP2	blue
CLEC11A	blue
TPM2	blue
ZYX	blue
ACTB	blue
ZZEF1	blue
ACVR1	blue
RAI14	blue
OGFR	blue
FAM110B	blue
SALL2	blue
CIRBP	blue
PTCHD1	blue
ETV2	blue
IGF1R	blue
BAZ1A	blue
PRR15	blue
FES	blue
OSR1	blue
MXRA7	blue
HIC1	blue
GGT5	blue
C16orf45	blue
CUBN	blue
ABCA3	blue
PLCH1	blue
RASA3	blue
C1QTNF1	blue
PEX10	blue
ZNF467	blue
RAB7B	blue
SFXN3	blue
RASD2	blue
SGIP1	blue
HTRA1	blue
RHOQ	blue
EVL	blue
FLAD1	blue
BBS1	blue
DNAJB5	blue
TMEM88	blue
MAP3K10	blue
ZNF79	blue
TMEM43	blue
MPDZ	blue
SORBS1	blue
TOMM22	blue
PLAT	blue
SOD3	blue
HSPB2	blue
FOXP3	blue
ZNF165	blue
C14orf132	blue
NCOA1	blue
KCNA5	blue
UGT8	blue
DACT3	blue
ASNA1	blue
EMG1	blue
RGMA	blue
CLDN5	blue
GUCY1A2	blue
GADD45GIP1	blue
CAND2	blue
DOK1	blue
HMGCR	blue
KLF11	blue
PER3	blue
GNA12	blue
ARHGAP22	blue
NPAS3	blue
PRMT2	blue
GPIHBP1	blue
COL13A1	blue
ZNF274	blue
CRLF1	blue
PDLIM4	blue
DAB2	blue
HSPB7	blue
HIST1H4L	blue
ROR1	blue
TMEM45A	blue
ZNF264	blue
MTX1	blue
CYB5R3	blue
ATP2B4	blue
COL4A5	blue
PMP22	blue
PRICKLE2	blue
FAM46B	blue
NRXN2	blue
SCN1B	blue
VCL	blue
FAM124B	blue
RFWD2	blue
DAPL1	blue
MRGPRF	blue
TERF2IP	blue
TIGD7	blue
MSX2	blue
ZFYVE20	blue
FERMT1	blue
RBPMS	blue
SLC16A2	blue
RASGRP2	blue
ANKRD6	blue
SGCA	blue
EFNA5	blue
PPAP2B	blue
SLC27A5	blue
SH3BGRL3	blue
MRPL22	blue
NOX1	blue
HIST1H2AB	blue
IDS	blue
SVEP1	blue
ECE2	blue
COL6A1	blue
CHRNA3	blue
ERH	blue
CCPG1	blue
ZSCAN16	blue
PPP3CB	blue
PHC1	blue
FBLN1	blue
LARP6	blue
CPXM2	blue
PFDN2	blue
MRPS17	blue
NTF3	blue
MRAS	blue
RAMP1	blue
PINK1	blue
JAM3	blue
CASQ2	blue
TSHZ2	blue
CCDC102A	blue
TIMP2	blue
TOMM40	blue
RNF149	blue
DDR2	blue
STON1	blue
PRKCE	blue
DLG2	blue
SQLE	blue
PDE1C	blue
ZDHHC7	blue
TMEM108	blue
SLC35B4	blue
NDUFA11	blue
FYCO1	blue
NIT2	blue
TSPYL4	blue
BHMT2	blue
ISLR	blue
PBX3	blue
WDR37	blue
BZW2	blue
LATS2	blue
ZSWIM6	blue
RAB2B	blue
HDC	blue
ZNF174	blue
TAGLN	blue
MAP6	blue
SAMD4A	blue
RPRM	blue
GNA11	grey
PPP1R13B	grey
RFNG	grey
VPS37C	grey
CCDC130	grey
MKNK2	grey
ITFG3	grey
LRRFIP1	grey
ADRA2B	grey
SGSM3	grey
TTC30B	grey
SPATA20	grey
ABCC5	grey
COPS7A	grey
GLUD2	grey
RRAGC	grey
HYI	grey
GRAMD4	grey
TMEM115	grey
RNF10	grey
UCN3	grey
SNX12	grey
GNG3	grey
KCNK9	grey
GPKOW	grey
EN2	grey
PACSIN2	grey
C2orf50	grey
PMM1	grey
SLC9A3	grey
CCDC22	grey
DRD2	grey
PCDHGA1	grey
C19orf26	grey
C1orf115	grey
UTS2R	grey
NAGS	grey
GSTM3	grey
GPR143	grey
BCAN	grey
LDHAL6A	grey
AIFM3	grey
NKX6-3	grey
LIPC	grey
MPPE1	grey
IGFL2	grey
SP5	grey
C21orf67	grey
NUDT21	turquoise
ATF1	turquoise
HAT1	turquoise
CDV3	turquoise
PTGES3	turquoise
CYB5R4	turquoise
C6orf211	turquoise
SCYL2	turquoise
KIF2A	turquoise
TWF1	turquoise
TMED2	turquoise
UTP18	turquoise
LAP3	turquoise
PLEKHF2	turquoise
WTAP	turquoise
PRPF18	turquoise
RPAP3	turquoise
TRUB1	turquoise
CCNH	turquoise
MAD2L1	turquoise
MRPL42	turquoise
NXT2	turquoise
ASCC3	turquoise
C12orf5	turquoise
DPM1	turquoise
NEDD1	turquoise
DEK	turquoise
ADAM10	turquoise
PRIM1	turquoise
PCNA	turquoise
BZW1	turquoise
CHORDC1	turquoise
USP1	turquoise
C2orf47	turquoise
AASDHPPT	turquoise
TMEM123	turquoise
MRPL44	turquoise
AMD1	turquoise
ARPC5	turquoise
LYPLA1	turquoise
POT1	turquoise
RBM45	turquoise
MANEA	turquoise
CDC40	turquoise
PGK1	turquoise
MSH2	turquoise
TMED5	turquoise
COMMD10	turquoise
CBFB	turquoise
ABCB10	turquoise
MRPL39	turquoise
FAM49B	turquoise
CCNC	turquoise
GNAI3	turquoise
YME1L1	turquoise
TM9SF2	turquoise
GDI2	turquoise
CENPH	turquoise
RNFT1	turquoise
TRNT1	turquoise
FAM76B	turquoise
ANKRD32	turquoise
ACTR6	turquoise
C12orf29	turquoise
RPE	turquoise
SUCLA2	turquoise
PSMD10	turquoise
ZNF644	turquoise
RCHY1	turquoise
H2AFZ	turquoise
SMARCA5	turquoise
ZC3H15	turquoise
STAG2	turquoise
TRMT10C	turquoise
NUDCD1	turquoise
DLAT	turquoise
EIF4E	turquoise
CENPK	turquoise
MRPL30	turquoise
NUP54	turquoise
MRPL47	turquoise
NBN	turquoise
DHX15	turquoise
SCO1	turquoise
DDX21	turquoise
UCHL5	turquoise
XRN2	turquoise
CTDSPL2	turquoise
TRMT11	turquoise
PSPC1	turquoise
HPS3	turquoise
BCCIP	turquoise
UEVLD	turquoise
SYNCRIP	turquoise
GFM1	turquoise
NUDCD2	turquoise
RNF219	turquoise
CEP57	turquoise
SRP72	turquoise
LACTB	turquoise
ACP1	turquoise
GFM2	turquoise
UBE2N	turquoise
ERCC8	turquoise
TATDN1	turquoise
NIF3L1	turquoise
DCK	turquoise
ADSS	turquoise
CKAP2	turquoise
DHFR	turquoise
TMPO	turquoise
SLBP	turquoise
RFC3	turquoise
NUP37	turquoise
CENPQ	turquoise
GGH	turquoise
MARS2	turquoise
YTHDF3	turquoise
PCGF6	turquoise
PGM3	turquoise
CTR9	turquoise
RNGTT	turquoise
YEATS4	turquoise
RB1	turquoise
CXCL11	turquoise
ABCE1	turquoise
SMNDC1	turquoise
SLC35F5	turquoise
ZNF92	turquoise
E2F5	turquoise
MIER3	turquoise
RFC5	turquoise
NAE1	turquoise
EED	turquoise
MINA	turquoise
PSMC6	turquoise
OTUD6B	turquoise
HMGN2	turquoise
TIPIN	turquoise
MNAT1	turquoise
OSGIN2	turquoise
FH	turquoise
TRMT6	turquoise
PSEN1	turquoise
ABI1	turquoise
EXOSC9	turquoise
MRPL3	turquoise
PUS7L	turquoise
EXOSC8	turquoise
CDC5L	turquoise
UBA6	turquoise
ZUFSP	turquoise
CLSPN	turquoise
RCN2	turquoise
RAN	turquoise
ABCC4	turquoise
NOC3L	turquoise
ATP2C1	turquoise
HNRNPF	turquoise
APOL4	turquoise
HDAC2	turquoise
CHCHD3	turquoise
SRP9	turquoise
ITGB3BP	turquoise
APOL6	turquoise
EPSTI1	turquoise
CD46	turquoise
ESCO2	turquoise
TAF1A	turquoise
TFB2M	turquoise
VRK1	turquoise
ING1	turquoise
IFIH1	turquoise
CAPRIN1	turquoise
GTF3C3	turquoise
ZNF184	turquoise
RFC4	turquoise
UTP15	turquoise
GMNN	turquoise
MRPL19	turquoise
UBE2D1	turquoise
ARL6IP6	turquoise
WDR13	turquoise
EXOSC3	turquoise
RARS	turquoise
SPAST	turquoise
TGDS	turquoise
PPP2R1B	turquoise
TRMT5	turquoise
MRS2	turquoise
LARP4	turquoise
SEC23B	turquoise
TFDP1	turquoise
VRK2	turquoise
BCLAF1	turquoise
SLC39A6	turquoise
DNAJA1	turquoise
RAD51AP1	turquoise
MINPP1	turquoise
CLPX	turquoise
PM20D2	turquoise
MRPS23	turquoise
SLC25A40	turquoise
G3BP1	turquoise
AGPS	turquoise
GCH1	turquoise
NCBP1	turquoise
MAPKAPK5	turquoise
SSB	turquoise
GRPEL2	turquoise
MALT1	turquoise
IMPAD1	turquoise
PGM2	turquoise
SNW1	turquoise
KPNA2	turquoise
PSMG1	turquoise
CLP1	turquoise
PIBF1	turquoise
PRPSAP2	turquoise
CCT2	turquoise
SMC6	turquoise
STT3B	turquoise
AZIN1	turquoise
FIGNL1	turquoise
MTHFD2	turquoise
SLC30A1	turquoise
SMC3	turquoise
IDE	turquoise
ECT2	turquoise
SAAL1	turquoise
GTF2H1	turquoise
PMAIP1	turquoise
ZBTB6	turquoise
DLG1	turquoise
ZNF273	turquoise
DEPDC1B	turquoise
PNO1	turquoise
MAPRE1	turquoise
SLC25A32	turquoise
PANK2	turquoise
MYC	turquoise
ZDHHC20	turquoise
LIN7C	turquoise
NUFIP1	turquoise
PDIA6	turquoise
YPEL3	turquoise
NCAPH	turquoise
KIF18A	turquoise
CACYBP	turquoise
HMGB2	turquoise
PRIM2	turquoise
COG3	turquoise
HMMR	turquoise
SNX10	turquoise
ZCCHC4	turquoise
API5	turquoise
GINS1	turquoise
CLOCK	turquoise
DNAJA2	turquoise
CCNE2	turquoise
PAPOLA	turquoise
EXOC6	turquoise
PLK4	turquoise
TASP1	turquoise
WDFY1	turquoise
ZNF680	turquoise
NFXL1	turquoise
ZKSCAN1	turquoise
NARS2	turquoise
RAF1	turquoise
PRPS2	turquoise
RNF6	turquoise
ERLIN1	turquoise
QTRTD1	turquoise
MAPK3	turquoise
SPATA5L1	turquoise
NUP160	turquoise
CSTF1	turquoise
HSPD1	turquoise
DHX9	turquoise
C1QBP	turquoise
CDKN3	turquoise
TYMS	turquoise
TMEM161B	turquoise
SNX5	turquoise
NCBP2	turquoise
SEPHS1	turquoise
HS2ST1	turquoise
ZWILCH	turquoise
CHEK1	turquoise
RRP15	turquoise
ILF2	turquoise
IFNG	turquoise
STRAP	turquoise
PPP1R8	turquoise
C5orf22	turquoise
NIP7	turquoise
CIAPIN1	turquoise
NOL11	turquoise
COPS3	turquoise
MRPL45	turquoise
ZNF146	turquoise
CXCL10	turquoise
HMGN1	turquoise
RNASEH2B	turquoise
TMEM182	turquoise
WDHD1	turquoise
IMMT	turquoise
MTFR1	turquoise
CHKB	turquoise
SMU1	turquoise
RABAC1	turquoise
NDC80	turquoise
ZBTB11	turquoise
CCNB1	turquoise
RAD21	turquoise
PRKCQ	turquoise
ANP32E	turquoise
COPS5	turquoise
RRM2	turquoise
YARS2	turquoise
PIH1D2	turquoise
FANCM	turquoise
METTL6	turquoise
DLEU1	turquoise
PTPN12	turquoise
HSPA4	turquoise
DTL	turquoise
RBM26	turquoise
ANLN	turquoise
HELLS	turquoise
AKAP5	turquoise
HSP90AA1	turquoise
OIP5	turquoise
MFN1	turquoise
RTN4IP1	turquoise
VBP1	turquoise
UBE2V2	turquoise
UBE2T	turquoise
DCUN1D5	turquoise
TMEM33	turquoise
ALG6	turquoise
HMGB1	turquoise
NUP107	turquoise
SLC30A6	turquoise
TIPRL	turquoise
BRAP	turquoise
NUDT5	turquoise
CREBZF	turquoise
CXCL9	turquoise
PRMT3	turquoise
C10orf88	turquoise
SMC4	turquoise
ZNF670	turquoise
ICAM1	turquoise
NXF1	turquoise
KPNA3	turquoise
CCNA2	turquoise
WDR12	turquoise
NKAP	turquoise
BRD7	turquoise
ZNF267	turquoise
NCR1	turquoise
CKS2	turquoise
KIAA0196	turquoise
NUDT15	turquoise
BUB3	turquoise
PPID	turquoise
ANP32A	turquoise
RBM34	turquoise
DDX1	turquoise
HPRT1	turquoise
FBXO5	turquoise
RASGEF1B	turquoise
PDE12	turquoise
MSH6	turquoise
SMEK2	turquoise
GTF2F2	turquoise
KIF11	turquoise
YWHAQ	turquoise
EAF1	turquoise
DUSP12	turquoise
PKP2	turquoise
NDFIP2	turquoise
PPIL1	turquoise
QSER1	turquoise
UTP6	turquoise
CXorf56	turquoise
SPTY2D1	turquoise
NUF2	turquoise
MTDH	turquoise
FBXO22	turquoise
PPHLN1	turquoise
GTF2I	turquoise
GBP5	turquoise
CRAT	turquoise
DEPDC1	turquoise
KIF21A	turquoise
ARL5B	turquoise
MCCC2	turquoise
RQCD1	turquoise
DONSON	turquoise
SPC25	turquoise
TUBD1	turquoise
ZNF41	turquoise
GMFB	turquoise
TMEM38B	turquoise
PDHX	turquoise
CRLS1	turquoise
CCT8	turquoise
MRPL48	turquoise
TAF1B	turquoise
HSPA14	turquoise
FAM98B	turquoise
MND1	turquoise
ACTL6A	turquoise
GSTCD	turquoise
RMND1	turquoise
SETD6	turquoise
IFT52	turquoise
RRAS	turquoise
RFC2	turquoise
BRIP1	turquoise
CSTF2	turquoise
ARHGAP12	turquoise
SUDS3	turquoise
INTS12	turquoise
POLE2	turquoise
GNB1	turquoise
B3GALT4	turquoise
KIAA1524	turquoise
ZNF485	turquoise
TMOD3	turquoise
ATAD2	turquoise
POLR3F	turquoise
FANCI	turquoise
LYAR	turquoise
TARS	turquoise
RFT1	turquoise
BUB1	turquoise
CTLA4	turquoise
PBK	turquoise
RNF138	turquoise
CCDC132	turquoise
DIAPH3	turquoise
WDR76	turquoise
CENPL	turquoise
VCPIP1	turquoise
APAF1	turquoise
SMC2	turquoise
SMEK1	turquoise
NLK	turquoise
PRPF40A	turquoise
TAF8	turquoise
FBXO28	turquoise
DNAJC4	turquoise
WDR89	turquoise
POLG2	turquoise
EGLN1	turquoise
NPDC1	turquoise
NEK2	turquoise
ZNF367	turquoise
ACAT2	turquoise
R3HDML	turquoise
CCT6A	turquoise
ZNF283	turquoise
IVNS1ABP	turquoise
SORD	turquoise
CHEK2	turquoise
CDC7	turquoise
RIPK2	turquoise
TMEM209	turquoise
PTPN11	turquoise
PRPF19	turquoise
RBBP9	turquoise
LEO1	turquoise
MRPS30	turquoise
RSRC1	turquoise
BRCA2	turquoise
NUPL1	turquoise
THNSL1	turquoise
RAD1	turquoise
JUND	turquoise
PTPLAD1	turquoise
TFRC	turquoise
RDM1	turquoise
SLC4A1AP	turquoise
XPOT	turquoise
RBM5	turquoise
AK2	turquoise
RBM12	turquoise
MTFMT	turquoise
ZW10	turquoise
RRN3	turquoise
TTC27	turquoise
PLAA	turquoise
SLC16A1	turquoise
CENPA	turquoise
MIPEP	turquoise
SLC39A10	turquoise
GTF2H3	turquoise
FANCF	turquoise
CAPZB	turquoise
PSAT1	turquoise
ERCC6L	turquoise
CCDC43	turquoise
ESCO1	turquoise
PARG	turquoise
USP28	turquoise
DSN1	turquoise
TSN	turquoise
YWHAB	turquoise
CDC23	turquoise
YWHAE	turquoise
TMEM67	turquoise
MTF2	turquoise
ZWINT	turquoise
DDX20	turquoise
NAPG	turquoise
TRIAP1	turquoise
E2F8	turquoise
CENPN	turquoise
ZNF200	turquoise
RAD54B	turquoise
CD151	turquoise
DSCC1	turquoise
LIN9	turquoise
PIK3CB	turquoise
VTI1A	turquoise
C9orf41	turquoise
NGDN	turquoise
GTPBP4	turquoise
RHEBL1	turquoise
PATZ1	turquoise
STAT1	turquoise
PPAT	turquoise
TBPL1	turquoise
KIAA0020	turquoise
TOPBP1	turquoise
TRAIP	turquoise
CASC5	turquoise
WBP2	turquoise
SRPK1	turquoise
WDR5	turquoise
MAGEA11	turquoise
NFE2L3	turquoise
UBA2	turquoise
HSPH1	turquoise
RELT	turquoise
ADNP	turquoise
NRAS	turquoise
YBX1	turquoise
PSMD11	turquoise
DUSP2	turquoise
BRCC3	turquoise
SLC39A9	turquoise
SGOL2	turquoise
NEIL3	turquoise
CDC123	turquoise
AES	turquoise
RACGAP1	turquoise
AGPAT5	turquoise
NBL1	turquoise
NUP155	turquoise
TMTC4	turquoise
IQCB1	turquoise
GART	turquoise
TMEM68	turquoise
PPP4R2	turquoise
DDX28	turquoise
BUB1B	turquoise
IARS2	turquoise
MED4	turquoise
MASTL	turquoise
FAM111B	turquoise
GZMB	turquoise
NUP98	turquoise
C1orf74	turquoise
QRSL1	turquoise
RMI1	turquoise
CUL2	turquoise
GUF1	turquoise
HEATR3	turquoise
PTPLB	turquoise
CSNK2A1	turquoise
C2orf49	turquoise
STT3A	turquoise
DHX37	turquoise
LTV1	turquoise
NCL	turquoise
TSC1	turquoise
TFAM	turquoise
HIATL1	turquoise
PMPCA	turquoise
C1orf27	turquoise
EPB41	turquoise
METAP1	turquoise
GTF3C4	turquoise
UTP14A	turquoise
INTS2	turquoise
PHF14	turquoise
UMPS	turquoise
PRPF38A	turquoise
NUSAP1	turquoise
EIF1AD	turquoise
CPSF3	turquoise
RPP38	turquoise
PDS5A	turquoise
HNRNPD	turquoise
DCLRE1A	turquoise
NUP50	turquoise
CHUK	turquoise
PRPF6	turquoise
CD274	turquoise
RRM1	turquoise
PMS1	turquoise
CENPE	turquoise
ARNTL2	turquoise
TOP1	turquoise
SASS6	turquoise
MAPK14	turquoise
RLF	turquoise
POU2F1	turquoise
HOMER1	turquoise
EPRS	turquoise
NCAPG	turquoise
KLHDC7B	turquoise
ASPM	turquoise
MRPS22	turquoise
LNX2	turquoise
ZBTB33	turquoise
MPHOSPH9	turquoise
GRPEL1	turquoise
ACTR3B	turquoise
TIGD2	turquoise
TAF5	turquoise
PPP5C	turquoise
TBC1D7	turquoise
PIF1	turquoise
STK3	turquoise
SMARCC1	turquoise
PAICS	turquoise
HSPA9	turquoise
RCC2	turquoise
MTCH2	turquoise
ZNF556	turquoise
FOXN2	turquoise
CEP55	turquoise
DCLRE1B	turquoise
CYB5R1	turquoise
RECQL4	turquoise
NSMCE2	turquoise
WDR62	turquoise
UBE3B	turquoise
WHSC1	turquoise
PAWR	turquoise
LMF1	turquoise
SEH1L	turquoise
ALG8	turquoise
EXO1	turquoise
ATP6V1C1	turquoise
CDCA3	turquoise
IPMK	turquoise
ZNF770	turquoise
GINS3	turquoise
ASB7	turquoise
MELK	turquoise
PARP9	turquoise
PDZD8	turquoise
NCOA4	turquoise
HMGA2	turquoise
OCEL1	turquoise
TCF20	turquoise
CCDC138	turquoise
SKP2	turquoise
INTS8	turquoise
UTP11L	turquoise
ZNF253	turquoise
SECTM1	turquoise
FASTKD3	turquoise
TRIOBP	turquoise
MLLT10	turquoise
CRNKL1	turquoise
POLR2D	turquoise
PTPN2	turquoise
STAC3	turquoise
TTK	turquoise
NUP88	turquoise
MRE11A	turquoise
KIF14	turquoise
RBBP8	turquoise
NUP205	turquoise
COQ3	turquoise
CHTF18	turquoise
FAM102A	turquoise
PIN1	turquoise
WARS	turquoise
USP10	turquoise
SFPQ	turquoise
FASTKD2	turquoise
KBTBD6	turquoise
CENPI	turquoise
SCML1	turquoise
GEN1	turquoise
ARMC1	turquoise
DNTTIP1	turquoise
DDX27	turquoise
COIL	turquoise
KCNK15	turquoise
HNRNPC	turquoise
TRIT1	turquoise
MRPS7	turquoise
DUT	turquoise
ARHGAP11A	turquoise
NCAPG2	turquoise
LIN54	turquoise
CSE1L	turquoise
PRMT5	turquoise
SDCCAG3	turquoise
CCT5	turquoise
AMMECR1	turquoise
SPATS2	turquoise
RTKN2	turquoise
ZNF343	turquoise
FANCB	turquoise
SCD	turquoise
EIF4A3	turquoise
LHPP	turquoise
CPSF2	turquoise
CLTB	turquoise
NAT10	turquoise
SLC25A33	turquoise
YTHDF2	turquoise
TRIM24	turquoise
TAF5L	turquoise
GATC	turquoise
CENPJ	turquoise
CYB5B	turquoise
OAS3	turquoise
NOB1	turquoise
MORC4	turquoise
R3HDM1	turquoise
DENR	turquoise
LRRC8B	turquoise
DNAJC9	turquoise
SART3	turquoise
ATE1	turquoise
PAIP1	turquoise
GLMN	turquoise
CDC25C	turquoise
EML4	turquoise
RPN2	turquoise
PIGA	turquoise
XPO4	turquoise
NANP	turquoise
MGLL	turquoise
ZIC5	turquoise
ATP11A	turquoise
LMNB1	turquoise
HSPB1	turquoise
PSMD13	turquoise
SPATA17	turquoise
ILF3	turquoise
CCDC117	turquoise
PIGW	turquoise
CCNB2	turquoise
NR2C1	turquoise
TUBGCP3	turquoise
KIF15	turquoise
UBE2S	turquoise
STMN1	turquoise
ZNF484	turquoise
CUL4A	turquoise
PTTG1	turquoise
SUGT1	turquoise
MYBL2	turquoise
TIMM8A	turquoise
MCM10	turquoise
RBM15B	turquoise
NCOA5	turquoise
KIAA1804	turquoise
CDK2	turquoise
MED28	turquoise
GCC1	turquoise
MRPL9	turquoise
MYB	turquoise
MCM6	turquoise
WDR90	turquoise
HEATR1	turquoise
LBR	turquoise
NOLC1	turquoise
PDSS1	turquoise
STIL	turquoise
E2F7	turquoise
TCF19	turquoise
YTHDF1	turquoise
NFS1	turquoise
FEN1	turquoise
C6orf62	turquoise
PCSK9	turquoise
DTYMK	turquoise
C2	turquoise
CCT4	turquoise
WDR82	turquoise
KIF23	turquoise
MRPS31	turquoise
C1orf131	turquoise
CSNK1G1	turquoise
