# Supplementary material for: Cross-talk of RNA modification "writers" describes tumor stemness and microenvironment and guides personalized immunotherapy for gastric cancer
Source: Aging (Albany NY). 2023 Jun 14;15(12):5445–81. doi: 10.18632/aging.204802 (PMC10333070; doi:10.18632/aging.204802)
Supplement: Supplementary Table 16 [file aging-15-204802-s017.xlsx]

## Sheet: Sheet1
Supplementary Table 16. Differentially expressed miRNAs and miRNAs-DEGs target pathways between WM_Score high and low groups in TCGA-STAD cohort.
miRNA	Target gene	miRNA expression	logFC_miRNA	FDR_miRNA	mRNA expression	logFC_mRNA	FDR_mRNA	miRNA_Target	Targeted pathway
hsa-let-7c-5p	NRAS	miRNA_up	1.42807	1.19e-18	mRNA_dn	-0.437934	2.31866e-15	hsa-let-7c-5p_NRAS	PD-1 checkpoint pathway in cancer
hsa-let-7c-5p	CHUK	miRNA_up	1.42807	1.19e-18	mRNA_dn	-0.434085	1.72933e-09	hsa-let-7c-5p_CHUK	PD-1 checkpoint pathway in cancer
hsa-let-7c-5p	TRAF6	miRNA_up	1.42807	1.19e-18	mRNA_dn	-0.177742	0.0374307	hsa-let-7c-5p_TRAF6	PD-1 checkpoint pathway in cancer
hsa-let-7c-5p	FOS	miRNA_up	1.42807	1.19e-18	mRNA_up	0.549377	0.000141025	hsa-let-7c-5p_FOS	PD-1 checkpoint pathway in cancer
hsa-let-7c-5p	RPS6KB1	miRNA_up	1.42807	1.19e-18	mRNA_dn	-0.217575	0.00409975	hsa-let-7c-5p_RPS6KB1	PD-1 checkpoint pathway in cancer
hsa-let-7c-5p	MAP3K3	miRNA_up	1.42807	1.19e-18	mRNA_up	0.505468	2.29014e-11	hsa-let-7c-5p_MAP3K3	PD-1 checkpoint pathway in cancer
hsa-let-7c-5p	CSNK2A1	miRNA_up	1.42807	1.19e-18	mRNA_dn	-0.396798	4.64394e-13	hsa-let-7c-5p_CSNK2A1	PD-1 checkpoint pathway in cancer
hsa-let-7c-5p	MAPK1	miRNA_up	1.42807	1.19e-18	mRNA_dn	-0.184595	0.000441609	hsa-let-7c-5p_MAPK1	PD-1 checkpoint pathway in cancer
hsa-let-7c-5p	PIK3CA	miRNA_up	1.42807	1.19e-18	mRNA_dn	-0.222158	0.0146084	hsa-let-7c-5p_PIK3CA	PD-1 checkpoint pathway in cancer
hsa-miR-1-3p	CSNK2A2	miRNA_up	2.07705	3.13e-20	mRNA_dn	-0.2178	5.04336e-05	hsa-miR-1-3p_CSNK2A2	PD-1 checkpoint pathway in cancer
hsa-miR-1-3p	NFATC3	miRNA_up	2.07705	3.13e-20	mRNA_dn	-0.189731	0.0242582	hsa-miR-1-3p_NFATC3	PD-1 checkpoint pathway in cancer
hsa-miR-1-3p	EML4	miRNA_up	2.07705	3.13e-20	mRNA_dn	-0.335421	8.12524e-09	hsa-miR-1-3p_EML4	PD-1 checkpoint pathway in cancer
hsa-miR-1-3p	PLCG1	miRNA_up	2.07705	3.13e-20	mRNA_dn	-0.251115	0.00155574	hsa-miR-1-3p_PLCG1	PD-1 checkpoint pathway in cancer
hsa-miR-1-3p	RAF1	miRNA_up	2.07705	3.13e-20	mRNA_dn	-0.119055	0.0222312	hsa-miR-1-3p_RAF1	PD-1 checkpoint pathway in cancer
hsa-miR-1-3p	MAPK13	miRNA_up	2.07705	3.13e-20	mRNA_dn	-0.18764	0.0110408	hsa-miR-1-3p_MAPK13	PD-1 checkpoint pathway in cancer
hsa-miR-1-3p	EGFR	miRNA_up	2.07705	3.13e-20	mRNA_dn	-0.376769	0.0300363	hsa-miR-1-3p_EGFR	PD-1 checkpoint pathway in cancer
hsa-miR-100-5p	MTOR	miRNA_up	1.22692	6.37e-17	mRNA_dn	-0.404212	2.49723e-11	hsa-miR-100-5p_MTOR	PD-1 checkpoint pathway in cancer
hsa-miR-100-5p	PIK3R3	miRNA_up	1.22692	6.37e-17	mRNA_dn	-0.202701	0.023589	hsa-miR-100-5p_PIK3R3	PD-1 checkpoint pathway in cancer
hsa-miR-100-5p	PTPN11	miRNA_up	1.22692	6.37e-17	mRNA_dn	-0.311362	8.44996e-08	hsa-miR-100-5p_PTPN11	PD-1 checkpoint pathway in cancer
hsa-miR-106a-5p	NFATC1	miRNA_dn	-1.06349	4.3e-16	mRNA_up	0.456911	9.6254e-05	hsa-miR-106a-5p_NFATC1	PD-1 checkpoint pathway in cancer
hsa-miR-106a-5p	STAT1	miRNA_dn	-1.06349	4.3e-16	mRNA_dn	-0.516042	6.99283e-08	hsa-miR-106a-5p_STAT1	PD-1 checkpoint pathway in cancer
hsa-miR-106a-5p	IFNGR1	miRNA_dn	-1.06349	4.3e-16	mRNA_dn	-0.336765	1.05827e-05	hsa-miR-106a-5p_IFNGR1	PD-1 checkpoint pathway in cancer
hsa-miR-106a-5p	MAPK14	miRNA_dn	-1.06349	4.3e-16	mRNA_dn	-0.199638	0.000861689	hsa-miR-106a-5p_MAPK14	PD-1 checkpoint pathway in cancer
hsa-miR-106a-5p	CD274	miRNA_dn	-1.06349	4.3e-16	mRNA_dn	-1.2136	6.42072e-12	hsa-miR-106a-5p_CD274	PD-1 checkpoint pathway in cancer
hsa-miR-1224-5p	MAP2K6	miRNA_dn	-2.95269	1.12e-19	mRNA_dn	-0.401213	0.00105763	hsa-miR-1224-5p_MAP2K6	PD-1 checkpoint pathway in cancer
hsa-miR-1224-5p	PDCD1	miRNA_dn	-2.95269	1.12e-19	mRNA_up	0.353997	0.028496	hsa-miR-1224-5p_PDCD1	PD-1 checkpoint pathway in cancer
hsa-miR-124-3p	JUN	miRNA_dn	-3.35029	3.73e-18	mRNA_up	0.432738	5.59888e-06	hsa-miR-124-3p_JUN	PD-1 checkpoint pathway in cancer
hsa-miR-124-3p	RELA	miRNA_dn	-3.35029	3.73e-18	mRNA_up	0.156004	0.00114403	hsa-miR-124-3p_RELA	PD-1 checkpoint pathway in cancer
hsa-miR-125b-5p	TICAM1	miRNA_up	1.47944	4.38e-28	mRNA_up	0.237965	0.00298966	hsa-miR-125b-5p_TICAM1	PD-1 checkpoint pathway in cancer
hsa-miR-125b-5p	PIK3CB	miRNA_up	1.47944	4.38e-28	mRNA_dn	-0.241594	0.000232175	hsa-miR-125b-5p_PIK3CB	PD-1 checkpoint pathway in cancer
hsa-miR-125b-5p	NFKBIE	miRNA_up	1.47944	4.38e-28	mRNA_up	0.245806	0.00581132	hsa-miR-125b-5p_NFKBIE	PD-1 checkpoint pathway in cancer
hsa-miR-1323	JAK2	miRNA_dn	-5.38094	1.5e-25	mRNA_dn	-0.399444	0.000941297	hsa-miR-1323_JAK2	PD-1 checkpoint pathway in cancer
hsa-miR-195-5p	CD3E	miRNA_up	1.0759	2.5e-21	mRNA_up	0.518318	0.000326611	hsa-miR-195-5p_CD3E	PD-1 checkpoint pathway in cancer
hsa-miR-195-5p	MAP2K3	miRNA_up	1.0759	2.5e-21	mRNA_up	0.232387	0.00281661	hsa-miR-195-5p_MAP2K3	PD-1 checkpoint pathway in cancer
hsa-miR-196b-5p	NFKBIA	miRNA_dn	-1.29422	3.7e-11	mRNA_up	0.370313	2.72588e-07	hsa-miR-196b-5p_NFKBIA	PD-1 checkpoint pathway in cancer
hsa-miR-296-3p	NFKBIB	miRNA_dn	-1.14163	4.18e-06	mRNA_up	0.289976	0.00020773	hsa-miR-296-3p_NFKBIB	PD-1 checkpoint pathway in cancer
hsa-let-7c-5p	GORAB	miRNA_up	1.42807	1.19e-18	mRNA_dn	-0.215089	0.0321787	hsa-let-7c-5p_GORAB	p53 signaling pathway
hsa-let-7c-5p	SESN3	miRNA_up	1.42807	1.19e-18	mRNA_up	0.349404	0.0130825	hsa-let-7c-5p_SESN3	p53 signaling pathway
hsa-let-7c-5p	CCND1	miRNA_up	1.42807	1.19e-18	mRNA_dn	-0.340219	0.00214624	hsa-let-7c-5p_CCND1	p53 signaling pathway
hsa-let-7c-5p	CHEK1	miRNA_up	1.42807	1.19e-18	mRNA_dn	-0.795366	1.64534e-23	hsa-let-7c-5p_CHEK1	p53 signaling pathway
hsa-let-7c-5p	APAF1	miRNA_up	1.42807	1.19e-18	mRNA_dn	-0.407226	1.27058e-07	hsa-let-7c-5p_APAF1	p53 signaling pathway
hsa-let-7c-5p	THBS1	miRNA_up	1.42807	1.19e-18	mRNA_up	0.747314	1.06008e-07	hsa-let-7c-5p_THBS1	p53 signaling pathway
hsa-let-7c-5p	TP53	miRNA_up	1.42807	1.19e-18	mRNA_dn	-0.222261	0.0307492	hsa-let-7c-5p_TP53	p53 signaling pathway
hsa-let-7c-5p	PMAIP1	miRNA_up	1.42807	1.19e-18	mRNA_dn	-0.715524	1.0119e-09	hsa-let-7c-5p_PMAIP1	p53 signaling pathway
hsa-let-7c-5p	RRM2	miRNA_up	1.42807	1.19e-18	mRNA_dn	-0.716131	6.70134e-17	hsa-let-7c-5p_RRM2	p53 signaling pathway
hsa-let-7c-5p	SHISA5	miRNA_up	1.42807	1.19e-18	mRNA_up	0.276159	9.71216e-07	hsa-let-7c-5p_SHISA5	p53 signaling pathway
hsa-let-7c-5p	RCHY1	miRNA_up	1.42807	1.19e-18	mRNA_dn	-0.456416	3.23094e-07	hsa-let-7c-5p_RCHY1	p53 signaling pathway
hsa-let-7c-5p	CASP3	miRNA_up	1.42807	1.19e-18	mRNA_dn	-0.375254	2.41984e-08	hsa-let-7c-5p_CASP3	p53 signaling pathway
hsa-let-7c-5p	CDK6	miRNA_up	1.42807	1.19e-18	mRNA_dn	-0.482088	0.00344969	hsa-let-7c-5p_CDK6	p53 signaling pathway
hsa-miR-1-3p	CDK4	miRNA_up	2.07705	3.13e-20	mRNA_dn	-0.234346	0.00798215	hsa-miR-1-3p_CDK4	p53 signaling pathway
hsa-miR-1-3p	CDK2	miRNA_up	2.07705	3.13e-20	mRNA_dn	-0.465938	4.35391e-14	hsa-miR-1-3p_CDK2	p53 signaling pathway
hsa-miR-1-3p	SERPINB5	miRNA_up	2.07705	3.13e-20	mRNA_dn	-0.689898	0.000252685	hsa-miR-1-3p_SERPINB5	p53 signaling pathway
hsa-miR-1-3p	ATR	miRNA_up	2.07705	3.13e-20	mRNA_dn	-0.481801	2.97589e-08	hsa-miR-1-3p_ATR	p53 signaling pathway
hsa-miR-1-3p	CCND3	miRNA_up	2.07705	3.13e-20	mRNA_up	0.349688	6.06073e-05	hsa-miR-1-3p_CCND3	p53 signaling pathway
hsa-miR-1-3p	CCNE2	miRNA_up	2.07705	3.13e-20	mRNA_dn	-0.818744	2.84724e-11	hsa-miR-1-3p_CCNE2	p53 signaling pathway
hsa-miR-1-3p	RRM2B	miRNA_up	2.07705	3.13e-20	mRNA_dn	-0.471037	1.32232e-09	hsa-miR-1-3p_RRM2B	p53 signaling pathway
hsa-miR-106a-5p	STEAP3	miRNA_dn	-1.06349	4.3e-16	mRNA_dn	-0.221855	0.0181809	hsa-miR-106a-5p_STEAP3	p53 signaling pathway
hsa-miR-106a-5p	CASP8	miRNA_dn	-1.06349	4.3e-16	mRNA_dn	-0.171496	0.00651473	hsa-miR-106a-5p_CASP8	p53 signaling pathway
hsa-miR-106a-5p	CCNB1	miRNA_dn	-1.06349	4.3e-16	mRNA_dn	-0.671024	1.61865e-15	hsa-miR-106a-5p_CCNB1	p53 signaling pathway
hsa-miR-106a-5p	SESN1	miRNA_dn	-1.06349	4.3e-16	mRNA_dn	-0.429554	0.000188344	hsa-miR-106a-5p_SESN1	p53 signaling pathway
hsa-miR-106a-5p	IGFBP3	miRNA_dn	-1.06349	4.3e-16	mRNA_up	0.255034	0.047192	hsa-miR-106a-5p_IGFBP3	p53 signaling pathway
hsa-miR-106a-5p	SERPINE1	miRNA_dn	-1.06349	4.3e-16	mRNA_up	0.694074	3.13631e-05	hsa-miR-106a-5p_SERPINE1	p53 signaling pathway
hsa-miR-1224-5p	PPM1D	miRNA_dn	-2.95269	1.12e-19	mRNA_dn	-0.173618	0.047448	hsa-miR-1224-5p_PPM1D	p53 signaling pathway
hsa-miR-1224-5p	TP53I3	miRNA_dn	-2.95269	1.12e-19	mRNA_up	0.295311	0.000974009	hsa-miR-1224-5p_TP53I3	p53 signaling pathway
hsa-miR-124-3p	SIVA1	miRNA_dn	-3.35029	3.73e-18	mRNA_up	0.215542	0.00131808	hsa-miR-124-3p_SIVA1	p53 signaling pathway
hsa-miR-124-3p	CCNE1	miRNA_dn	-3.35029	3.73e-18	mRNA_dn	-1.01646	2.39463e-07	hsa-miR-124-3p_CCNE1	p53 signaling pathway
hsa-miR-124-3p	GTSE1	miRNA_dn	-3.35029	3.73e-18	mRNA_dn	-0.679584	1.03126e-16	hsa-miR-124-3p_GTSE1	p53 signaling pathway
hsa-miR-1251-5p	CCNG1	miRNA_dn	-1.02516	0.00267597	mRNA_dn	-0.230605	0.00438952	hsa-miR-1251-5p_CCNG1	p53 signaling pathway
hsa-miR-125b-5p	CD82	miRNA_up	1.47944	4.38e-28	mRNA_up	0.393943	1.57114e-05	hsa-miR-125b-5p_CD82	p53 signaling pathway
hsa-miR-125b-5p	BBC3	miRNA_up	1.47944	4.38e-28	mRNA_up	0.333257	0.00118669	hsa-miR-125b-5p_BBC3	p53 signaling pathway
hsa-miR-1323	CDK1	miRNA_dn	-5.38094	1.5e-25	mRNA_dn	-0.730609	8.47931e-19	hsa-miR-1323_CDK1	p53 signaling pathway
hsa-miR-1323	CYCS	miRNA_dn	-5.38094	1.5e-25	mRNA_dn	-0.225741	0.00543207	hsa-miR-1323_CYCS	p53 signaling pathway
hsa-miR-143-3p	CHEK2	miRNA_up	1.24136	2.34e-16	mRNA_dn	-0.653876	1.66929e-13	hsa-miR-143-3p_CHEK2	p53 signaling pathway
hsa-miR-145-5p	SFN	miRNA_up	1.38497	6.5e-20	mRNA_up	0.419913	0.0105469	hsa-miR-145-5p_SFN	p53 signaling pathway
hsa-miR-515-5p	TSC2	miRNA_dn	-4.17176	4.59e-18	mRNA_up	0.165167	0.00379901	hsa-miR-515-5p_TSC2	p53 signaling pathway
hsa-miR-520d-5p	CCNB2	miRNA_dn	-4.4767	5.26e-26	mRNA_dn	-0.645994	9.22921e-19	hsa-miR-520d-5p_CCNB2	p53 signaling pathway
hsa-let-7c-5p	NBL1	miRNA_up	1.42807	1.19e-18	mRNA_up	0.831885	1.09601e-19	hsa-let-7c-5p_NBL1	TGF-beta signaling pathway
hsa-let-7c-5p	DCN	miRNA_up	1.42807	1.19e-18	mRNA_up	1.07604	1.12975e-14	hsa-let-7c-5p_DCN	TGF-beta signaling pathway
hsa-let-7c-5p	SP1	miRNA_up	1.42807	1.19e-18	mRNA_dn	-0.228467	1.79779e-06	hsa-let-7c-5p_SP1	TGF-beta signaling pathway
hsa-let-7c-5p	FBN1	miRNA_up	1.42807	1.19e-18	mRNA_up	0.569046	4.02103e-05	hsa-let-7c-5p_FBN1	TGF-beta signaling pathway
hsa-let-7c-5p	BMP2	miRNA_up	1.42807	1.19e-18	mRNA_up	0.438109	0.000817978	hsa-let-7c-5p_BMP2	TGF-beta signaling pathway
hsa-let-7c-5p	ACVR2B	miRNA_up	1.42807	1.19e-18	mRNA_dn	-0.744558	3.00003e-07	hsa-let-7c-5p_ACVR2B	TGF-beta signaling pathway
hsa-let-7c-5p	ZFYVE16	miRNA_up	1.42807	1.19e-18	mRNA_dn	-0.288439	0.000761652	hsa-let-7c-5p_ZFYVE16	TGF-beta signaling pathway
hsa-let-7c-5p	SMAD5	miRNA_up	1.42807	1.19e-18	mRNA_dn	-0.216669	0.000403004	hsa-let-7c-5p_SMAD5	TGF-beta signaling pathway
hsa-let-7c-5p	E2F5	miRNA_up	1.42807	1.19e-18	mRNA_dn	-0.631105	4.11062e-11	hsa-let-7c-5p_E2F5	TGF-beta signaling pathway
hsa-let-7c-5p	TGFBR1	miRNA_up	1.42807	1.19e-18	mRNA_up	0.225093	0.0165099	hsa-let-7c-5p_TGFBR1	TGF-beta signaling pathway
hsa-miR-1-3p	BAMBI	miRNA_up	2.07705	3.13e-20	mRNA_dn	-1.48997	3.33171e-14	hsa-miR-1-3p_BAMBI	TGF-beta signaling pathway
hsa-miR-1-3p	PPP2R1B	miRNA_up	2.07705	3.13e-20	mRNA_dn	-0.486825	1.12899e-13	hsa-miR-1-3p_PPP2R1B	TGF-beta signaling pathway
hsa-miR-1-3p	GREM1	miRNA_up	2.07705	3.13e-20	mRNA_up	1.17077	4.34428e-11	hsa-miR-1-3p_GREM1	TGF-beta signaling pathway
hsa-miR-1-3p	SMAD3	miRNA_up	2.07705	3.13e-20	mRNA_up	0.176845	0.0268871	hsa-miR-1-3p_SMAD3	TGF-beta signaling pathway
hsa-miR-1-3p	TGIF1	miRNA_up	2.07705	3.13e-20	mRNA_dn	-0.144436	0.0374307	hsa-miR-1-3p_TGIF1	TGF-beta signaling pathway
hsa-miR-1-3p	INHBB	miRNA_up	2.07705	3.13e-20	mRNA_dn	-0.727823	0.000273051	hsa-miR-1-3p_INHBB	TGF-beta signaling pathway
hsa-miR-1-3p	TGIF2	miRNA_up	2.07705	3.13e-20	mRNA_dn	-0.239057	0.000995181	hsa-miR-1-3p_TGIF2	TGF-beta signaling pathway
hsa-miR-1-3p	TGFBR2	miRNA_up	2.07705	3.13e-20	mRNA_up	0.348544	0.000227927	hsa-miR-1-3p_TGFBR2	TGF-beta signaling pathway
hsa-miR-1-3p	ID4	miRNA_up	2.07705	3.13e-20	mRNA_up	0.466002	0.000924757	hsa-miR-1-3p_ID4	TGF-beta signaling pathway
hsa-miR-1-3p	INHBA	miRNA_up	2.07705	3.13e-20	mRNA_up	0.492442	0.000479069	hsa-miR-1-3p_INHBA	TGF-beta signaling pathway
hsa-miR-100-5p	ZFYVE9	miRNA_up	1.22692	6.37e-17	mRNA_dn	-0.268739	0.00174124	hsa-miR-100-5p_ZFYVE9	TGF-beta signaling pathway
hsa-miR-106a-5p	BMP8B	miRNA_dn	-1.06349	4.3e-16	mRNA_dn	-0.440557	8.79238e-05	hsa-miR-106a-5p_BMP8B	TGF-beta signaling pathway
hsa-miR-106a-5p	RGMA	miRNA_dn	-1.06349	4.3e-16	mRNA_up	2.37498	2.5022e-28	hsa-miR-106a-5p_RGMA	TGF-beta signaling pathway
hsa-miR-106a-5p	THSD4	miRNA_dn	-1.06349	4.3e-16	mRNA_up	0.611913	5.86889e-05	hsa-miR-106a-5p_THSD4	TGF-beta signaling pathway
hsa-miR-106a-5p	SMAD7	miRNA_dn	-1.06349	4.3e-16	mRNA_up	0.224904	0.0202161	hsa-miR-106a-5p_SMAD7	TGF-beta signaling pathway
hsa-miR-106a-5p	RBL1	miRNA_dn	-1.06349	4.3e-16	mRNA_dn	-0.797013	2.9172e-25	hsa-miR-106a-5p_RBL1	TGF-beta signaling pathway
hsa-miR-106a-5p	EP300	miRNA_dn	-1.06349	4.3e-16	mRNA_dn	-0.183524	0.000170788	hsa-miR-106a-5p_EP300	TGF-beta signaling pathway
hsa-miR-106a-5p	RGMB	miRNA_dn	-1.06349	4.3e-16	mRNA_up	0.587108	4.52132e-06	hsa-miR-106a-5p_RGMB	TGF-beta signaling pathway
hsa-miR-106a-5p	CUL1	miRNA_dn	-1.06349	4.3e-16	mRNA_dn	-0.272823	4.98898e-08	hsa-miR-106a-5p_CUL1	TGF-beta signaling pathway
hsa-miR-106a-5p	CDKN2B	miRNA_dn	-1.06349	4.3e-16	mRNA_up	0.323453	0.0172562	hsa-miR-106a-5p_CDKN2B	TGF-beta signaling pathway
hsa-miR-1224-5p	GREM2	miRNA_dn	-2.95269	1.12e-19	mRNA_up	1.83178	1.20882e-17	hsa-miR-1224-5p_GREM2	TGF-beta signaling pathway
hsa-miR-124-3p	TGFB1	miRNA_dn	-3.35029	3.73e-18	mRNA_up	0.582793	1.18455e-10	hsa-miR-124-3p_TGFB1	TGF-beta signaling pathway
hsa-miR-124-3p	BMP7	miRNA_dn	-3.35029	3.73e-18	mRNA_dn	-0.762194	0.000494101	hsa-miR-124-3p_BMP7	TGF-beta signaling pathway
hsa-miR-124-3p	BMP6	miRNA_dn	-3.35029	3.73e-18	mRNA_up	0.382883	0.00715955	hsa-miR-124-3p_BMP6	TGF-beta signaling pathway
hsa-miR-1251-5p	FST	miRNA_dn	-1.02516	0.00267597	mRNA_dn	-0.657418	0.00423378	hsa-miR-1251-5p_FST	TGF-beta signaling pathway
hsa-miR-125b-5p	PPP2R1A	miRNA_up	1.47944	4.38e-28	mRNA_up	0.1243	0.0287394	hsa-miR-125b-5p_PPP2R1A	TGF-beta signaling pathway
hsa-miR-1323	ID3	miRNA_dn	-5.38094	1.5e-25	mRNA_up	0.358735	0.000195658	hsa-miR-1323_ID3	TGF-beta signaling pathway
hsa-miR-1323	SMAD9	miRNA_dn	-5.38094	1.5e-25	mRNA_up	0.776743	2.83353e-05	hsa-miR-1323_SMAD9	TGF-beta signaling pathway
hsa-miR-1323	TFDP1	miRNA_dn	-5.38094	1.5e-25	mRNA_dn	-0.477094	6.74277e-14	hsa-miR-1323_TFDP1	TGF-beta signaling pathway
hsa-miR-1323	LTBP1	miRNA_dn	-5.38094	1.5e-25	mRNA_up	0.951444	1.23674e-13	hsa-miR-1323_LTBP1	TGF-beta signaling pathway
hsa-miR-195-5p	CHRD	miRNA_up	1.0759	2.5e-21	mRNA_up	0.944123	1.87178e-08	hsa-miR-195-5p_CHRD	TGF-beta signaling pathway
hsa-miR-490-3p	TGFB3	miRNA_up	2.45651	1.38e-13	mRNA_up	0.673288	9.91346e-07	hsa-miR-490-3p_TGFB3	TGF-beta signaling pathway
hsa-let-7c-5p	SCD	miRNA_up	1.42807	1.19e-18	mRNA_dn	-0.804097	2.53656e-09	hsa-let-7c-5p_SCD	AMPK signaling pathway
hsa-let-7c-5p	PPP2R5C	miRNA_up	1.42807	1.19e-18	mRNA_dn	-0.172332	0.00413521	hsa-let-7c-5p_PPP2R5C	AMPK signaling pathway
hsa-let-7c-5p	ACACA	miRNA_up	1.42807	1.19e-18	mRNA_dn	-0.329259	6.55331e-05	hsa-let-7c-5p_ACACA	AMPK signaling pathway
hsa-let-7c-5p	INSR	miRNA_up	1.42807	1.19e-18	mRNA_up	0.182401	0.0128016	hsa-let-7c-5p_INSR	AMPK signaling pathway
hsa-let-7c-5p	AKT1S1	miRNA_up	1.42807	1.19e-18	mRNA_up	0.219265	0.000902279	hsa-let-7c-5p_AKT1S1	AMPK signaling pathway
hsa-let-7c-5p	PFKFB4	miRNA_up	1.42807	1.19e-18	mRNA_dn	-0.326963	0.0346649	hsa-let-7c-5p_PFKFB4	AMPK signaling pathway
hsa-let-7c-5p	PPP2R2A	miRNA_up	1.42807	1.19e-18	mRNA_dn	-0.301812	6.85241e-06	hsa-let-7c-5p_PPP2R2A	AMPK signaling pathway
hsa-let-7c-5p	TSC1	miRNA_up	1.42807	1.19e-18	mRNA_dn	-0.228824	0.00523509	hsa-let-7c-5p_TSC1	AMPK signaling pathway
hsa-miR-1-3p	PPP2R5E	miRNA_up	2.07705	3.13e-20	mRNA_dn	-0.14053	0.0361917	hsa-miR-1-3p_PPP2R5E	AMPK signaling pathway
hsa-miR-1-3p	SLC2A4	miRNA_up	2.07705	3.13e-20	mRNA_up	1.98485	7.5601e-19	hsa-miR-1-3p_SLC2A4	AMPK signaling pathway
hsa-miR-1-3p	PPP2R3A	miRNA_up	2.07705	3.13e-20	mRNA_up	0.533264	3.07146e-05	hsa-miR-1-3p_PPP2R3A	AMPK signaling pathway
hsa-miR-1-3p	HMGCR	miRNA_up	2.07705	3.13e-20	mRNA_dn	-0.43832	5.15708e-08	hsa-miR-1-3p_HMGCR	AMPK signaling pathway
hsa-miR-1-3p	FBP1	miRNA_up	2.07705	3.13e-20	mRNA_up	0.543753	2.73769e-05	hsa-miR-1-3p_FBP1	AMPK signaling pathway
hsa-miR-106a-5p	LEPR	miRNA_dn	-1.06349	4.3e-16	mRNA_up	0.703706	3.40714e-06	hsa-miR-106a-5p_LEPR	AMPK signaling pathway
hsa-miR-106a-5p	SREBF1	miRNA_dn	-1.06349	4.3e-16	mRNA_dn	-0.249888	0.0156322	hsa-miR-106a-5p_SREBF1	AMPK signaling pathway
hsa-miR-106a-5p	RAB11B	miRNA_dn	-1.06349	4.3e-16	mRNA_up	0.431149	5.18685e-14	hsa-miR-106a-5p_RAB11B	AMPK signaling pathway
hsa-miR-106a-5p	RAB10	miRNA_dn	-1.06349	4.3e-16	mRNA_dn	-0.160626	0.00196223	hsa-miR-106a-5p_RAB10	AMPK signaling pathway
hsa-miR-106a-5p	STRADB	miRNA_dn	-1.06349	4.3e-16	mRNA_dn	-0.178639	0.0259411	hsa-miR-106a-5p_STRADB	AMPK signaling pathway
hsa-miR-106a-5p	CREB1	miRNA_dn	-1.06349	4.3e-16	mRNA_dn	-0.207144	0.00521564	hsa-miR-106a-5p_CREB1	AMPK signaling pathway
hsa-miR-106a-5p	CAB39	miRNA_dn	-1.06349	4.3e-16	mRNA_dn	-0.182825	0.000246797	hsa-miR-106a-5p_CAB39	AMPK signaling pathway
hsa-miR-106a-5p	PRKAA1	miRNA_dn	-1.06349	4.3e-16	mRNA_dn	-0.207614	0.00338784	hsa-miR-106a-5p_PRKAA1	AMPK signaling pathway
hsa-miR-106a-5p	MAP3K7	miRNA_dn	-1.06349	4.3e-16	mRNA_dn	-0.329736	1.1337e-06	hsa-miR-106a-5p_MAP3K7	AMPK signaling pathway
hsa-miR-106a-5p	RAB14	miRNA_dn	-1.06349	4.3e-16	mRNA_dn	-0.29149	4.05315e-09	hsa-miR-106a-5p_RAB14	AMPK signaling pathway
hsa-miR-1224-5p	PRKAG1	miRNA_dn	-2.95269	1.12e-19	mRNA_dn	-0.113337	0.0486273	hsa-miR-1224-5p_PRKAG1	AMPK signaling pathway
hsa-miR-1224-5p	FASN	miRNA_dn	-2.95269	1.12e-19	mRNA_dn	-0.52023	1.63166e-08	hsa-miR-1224-5p_FASN	AMPK signaling pathway
hsa-miR-1224-5p	PPP2R5D	miRNA_dn	-2.95269	1.12e-19	mRNA_dn	-0.300304	4.38001e-05	hsa-miR-1224-5p_PPP2R5D	AMPK signaling pathway
hsa-miR-124-3p	G6PC3	miRNA_dn	-3.35029	3.73e-18	mRNA_up	0.144955	0.0443488	hsa-miR-124-3p_G6PC3	AMPK signaling pathway
hsa-miR-124-3p	ELAVL1	miRNA_dn	-3.35029	3.73e-18	mRNA_dn	-0.182257	0.000154375	hsa-miR-124-3p_ELAVL1	AMPK signaling pathway
hsa-miR-124-3p	LIPE	miRNA_dn	-3.35029	3.73e-18	mRNA_up	0.379351	0.00511172	hsa-miR-124-3p_LIPE	AMPK signaling pathway
hsa-miR-124-3p	HNF4A	miRNA_dn	-3.35029	3.73e-18	mRNA_dn	-0.485494	1.21056e-05	hsa-miR-124-3p_HNF4A	AMPK signaling pathway
hsa-miR-124-3p	PRKAG2	miRNA_dn	-3.35029	3.73e-18	mRNA_up	0.222688	0.0104798	hsa-miR-124-3p_PRKAG2	AMPK signaling pathway
hsa-miR-1251-5p	PFKFB2	miRNA_dn	-1.02516	0.00267597	mRNA_dn	-0.34312	0.00205195	hsa-miR-1251-5p_PFKFB2	AMPK signaling pathway
hsa-miR-1251-5p	CAB39L	miRNA_dn	-1.02516	0.00267597	mRNA_up	0.468233	0.0005742	hsa-miR-1251-5p_CAB39L	AMPK signaling pathway
hsa-miR-125b-5p	ACACB	miRNA_up	1.47944	4.38e-28	mRNA_up	0.708228	9.56643e-09	hsa-miR-125b-5p_ACACB	AMPK signaling pathway
hsa-miR-125b-5p	CREB3	miRNA_up	1.47944	4.38e-28	mRNA_up	0.228082	0.00201114	hsa-miR-125b-5p_CREB3	AMPK signaling pathway
hsa-miR-1269a	PFKM	miRNA_dn	-1.00229	0.0229912	mRNA_dn	-0.275302	0.000302223	hsa-miR-1269a_PFKM	AMPK signaling pathway
hsa-miR-1323	CCNA2	miRNA_dn	-5.38094	1.5e-25	mRNA_dn	-0.811012	8.77149e-24	hsa-miR-1323_CCNA2	AMPK signaling pathway
hsa-miR-145-5p	CD36	miRNA_up	1.38497	6.5e-20	mRNA_up	0.739051	1.05922e-05	hsa-miR-145-5p_CD36	AMPK signaling pathway
hsa-miR-371a-5p	TBC1D1	miRNA_up	2.12772	0.00107627	mRNA_up	0.20895	0.0101805	hsa-miR-371a-5p_TBC1D1	AMPK signaling pathway
hsa-let-7c-5p	MAPK8	miRNA_up	1.42807	1.19e-18	mRNA_dn	-0.244893	0.00513634	hsa-let-7c-5p_MAPK8	FoxO signaling pathway
hsa-let-7c-5p	NLK	miRNA_up	1.42807	1.19e-18	mRNA_dn	-0.262065	0.00039021	hsa-let-7c-5p_NLK	FoxO signaling pathway
hsa-let-7c-5p	STK4	miRNA_up	1.42807	1.19e-18	mRNA_dn	-0.210617	0.000417696	hsa-let-7c-5p_STK4	FoxO signaling pathway
hsa-let-7c-5p	HOMER1	miRNA_up	1.42807	1.19e-18	mRNA_dn	-0.438325	0.000170299	hsa-let-7c-5p_HOMER1	FoxO signaling pathway
hsa-let-7c-5p	FBXO32	miRNA_up	1.42807	1.19e-18	mRNA_up	1.20172	4.17115e-16	hsa-let-7c-5p_FBXO32	FoxO signaling pathway
hsa-miR-106a-5p	PLK3	miRNA_dn	-1.06349	4.3e-16	mRNA_up	0.367087	4.97259e-06	hsa-miR-106a-5p_PLK3	FoxO signaling pathway
hsa-miR-106a-5p	S1PR1	miRNA_dn	-1.06349	4.3e-16	mRNA_up	0.889688	1.39303e-16	hsa-miR-106a-5p_S1PR1	FoxO signaling pathway
hsa-miR-106a-5p	GABARAPL1	miRNA_dn	-1.06349	4.3e-16	mRNA_up	0.699022	1.83645e-13	hsa-miR-106a-5p_GABARAPL1	FoxO signaling pathway
hsa-miR-106a-5p	BCL6	miRNA_dn	-1.06349	4.3e-16	mRNA_up	0.477264	1.17299e-07	hsa-miR-106a-5p_BCL6	FoxO signaling pathway
hsa-miR-1224-5p	PLK1	miRNA_dn	-2.95269	1.12e-19	mRNA_dn	-0.491079	2.39411e-08	hsa-miR-1224-5p_PLK1	FoxO signaling pathway
hsa-miR-1224-5p	GABARAPL2	miRNA_dn	-2.95269	1.12e-19	mRNA_up	0.236474	3.6123e-06	hsa-miR-1224-5p_GABARAPL2	FoxO signaling pathway
hsa-miR-124-3p	USP7	miRNA_dn	-3.35029	3.73e-18	mRNA_dn	-0.295166	1.35482e-09	hsa-miR-124-3p_USP7	FoxO signaling pathway
hsa-miR-124-3p	GABARAP	miRNA_dn	-3.35029	3.73e-18	mRNA_up	0.324598	2.58298e-09	hsa-miR-124-3p_GABARAP	FoxO signaling pathway
hsa-miR-124-3p	KLF2	miRNA_dn	-3.35029	3.73e-18	mRNA_up	1.10876	7.27074e-20	hsa-miR-124-3p_KLF2	FoxO signaling pathway
hsa-miR-124-3p	SKP2	miRNA_dn	-3.35029	3.73e-18	mRNA_dn	-0.711333	3.61972e-16	hsa-miR-124-3p_SKP2	FoxO signaling pathway
hsa-miR-1251-5p	IL7R	miRNA_dn	-1.02516	0.00267597	mRNA_up	0.442468	0.00231944	hsa-miR-1251-5p_IL7R	FoxO signaling pathway
hsa-miR-371a-5p	HOMER3	miRNA_up	2.12772	0.00107627	mRNA_up	0.461825	1.15611e-05	hsa-miR-371a-5p_HOMER3	FoxO signaling pathway
hsa-miR-449a	FBXO25	miRNA_dn	-1.54737	4.91e-07	mRNA_dn	-0.215152	0.0301776	hsa-miR-449a_FBXO25	FoxO signaling pathway
hsa-miR-508-3p	PLK4	miRNA_dn	-1.57624	7.41e-11	mRNA_dn	-0.811884	2.76511e-23	hsa-miR-508-3p_PLK4	FoxO signaling pathway
hsa-let-7c-5p	E2F2	miRNA_up	1.42807	1.19e-18	mRNA_dn	-0.733871	1.33789e-12	hsa-let-7c-5p_E2F2	Gastric cancer
hsa-let-7c-5p	WNT9A	miRNA_up	1.42807	1.19e-18	mRNA_up	1.13805	5.67199e-10	hsa-let-7c-5p_WNT9A	Gastric cancer
hsa-let-7c-5p	WNT2B	miRNA_up	1.42807	1.19e-18	mRNA_up	0.720833	1.26544e-05	hsa-let-7c-5p_WNT2B	Gastric cancer
hsa-let-7c-5p	FZD4	miRNA_up	1.42807	1.19e-18	mRNA_up	0.464192	1.00569e-06	hsa-let-7c-5p_FZD4	Gastric cancer
hsa-let-7c-5p	LRP6	miRNA_up	1.42807	1.19e-18	mRNA_dn	-0.384109	6.53814e-08	hsa-let-7c-5p_LRP6	Gastric cancer
hsa-let-7c-5p	RB1	miRNA_up	1.42807	1.19e-18	mRNA_dn	-0.351829	7.62687e-08	hsa-let-7c-5p_RB1	Gastric cancer
hsa-let-7c-5p	BCL2	miRNA_up	1.42807	1.19e-18	mRNA_up	0.344747	0.00792228	hsa-let-7c-5p_BCL2	Gastric cancer
hsa-let-7c-5p	TCF7L1	miRNA_up	1.42807	1.19e-18	mRNA_up	0.497432	0.000120582	hsa-let-7c-5p_TCF7L1	Gastric cancer
hsa-let-7c-5p	CDKN1A	miRNA_up	1.42807	1.19e-18	mRNA_up	0.361748	0.000304611	hsa-let-7c-5p_CDKN1A	Gastric cancer
hsa-let-7c-5p	HGF	miRNA_up	1.42807	1.19e-18	mRNA_up	0.526483	0.00081944	hsa-let-7c-5p_HGF	Gastric cancer
hsa-let-7c-5p	FZD3	miRNA_up	1.42807	1.19e-18	mRNA_dn	-0.413297	0.000147616	hsa-let-7c-5p_FZD3	Gastric cancer
hsa-miR-1-3p	MAPK3	miRNA_up	2.07705	3.13e-20	mRNA_up	0.48218	6.65762e-11	hsa-miR-1-3p_MAPK3	Gastric cancer
hsa-miR-1-3p	SOS1	miRNA_up	2.07705	3.13e-20	mRNA_dn	-0.238788	2.16852e-05	hsa-miR-1-3p_SOS1	Gastric cancer
hsa-miR-1-3p	GSK3B	miRNA_up	2.07705	3.13e-20	mRNA_dn	-0.291061	5.39048e-09	hsa-miR-1-3p_GSK3B	Gastric cancer
hsa-miR-1-3p	RARB	miRNA_up	2.07705	3.13e-20	mRNA_up	0.513786	2.06076e-05	hsa-miR-1-3p_RARB	Gastric cancer
hsa-miR-1-3p	CTNNB1	miRNA_up	2.07705	3.13e-20	mRNA_dn	-0.626415	4.1903e-18	hsa-miR-1-3p_CTNNB1	Gastric cancer
hsa-miR-1-3p	E2F3	miRNA_up	2.07705	3.13e-20	mRNA_dn	-0.551778	1.02898e-15	hsa-miR-1-3p_E2F3	Gastric cancer
hsa-miR-1-3p	MET	miRNA_up	2.07705	3.13e-20	mRNA_dn	-0.893085	2.16457e-09	hsa-miR-1-3p_MET	Gastric cancer
hsa-miR-1-3p	ARAF	miRNA_up	2.07705	3.13e-20	mRNA_up	0.1967	0.000730257	hsa-miR-1-3p_ARAF	Gastric cancer
hsa-miR-100-5p	SHC1	miRNA_up	1.22692	6.37e-17	mRNA_up	0.165662	0.00327699	hsa-miR-100-5p_SHC1	Gastric cancer
hsa-miR-100-5p	FZD8	miRNA_up	1.22692	6.37e-17	mRNA_up	0.860182	5.16894e-12	hsa-miR-100-5p_FZD8	Gastric cancer
hsa-miR-106a-5p	AKT3	miRNA_dn	-1.06349	4.3e-16	mRNA_up	0.749256	6.58848e-09	hsa-miR-106a-5p_AKT3	Gastric cancer
hsa-miR-106a-5p	FGFR2	miRNA_dn	-1.06349	4.3e-16	mRNA_up	0.501406	0.0107252	hsa-miR-106a-5p_FGFR2	Gastric cancer
hsa-miR-106a-5p	FGF7	miRNA_dn	-1.06349	4.3e-16	mRNA_up	1.15161	1.32355e-11	hsa-miR-106a-5p_FGF7	Gastric cancer
hsa-miR-106a-5p	GADD45B	miRNA_dn	-1.06349	4.3e-16	mRNA_up	0.848893	1.60905e-15	hsa-miR-106a-5p_GADD45B	Gastric cancer
hsa-miR-106a-5p	E2F1	miRNA_dn	-1.06349	4.3e-16	mRNA_dn	-0.515829	1.13659e-08	hsa-miR-106a-5p_E2F1	Gastric cancer
hsa-miR-106a-5p	WNT5A	miRNA_dn	-1.06349	4.3e-16	mRNA_up	0.275382	0.0480758	hsa-miR-106a-5p_WNT5A	Gastric cancer
hsa-miR-106a-5p	FGF2	miRNA_dn	-1.06349	4.3e-16	mRNA_up	1.4209	8.38736e-16	hsa-miR-106a-5p_FGF2	Gastric cancer
hsa-miR-106a-5p	FGF18	miRNA_dn	-1.06349	4.3e-16	mRNA_up	0.360275	0.0393426	hsa-miR-106a-5p_FGF18	Gastric cancer
hsa-miR-106a-5p	FZD1	miRNA_dn	-1.06349	4.3e-16	mRNA_up	0.393122	5.28963e-05	hsa-miR-106a-5p_FZD1	Gastric cancer
hsa-miR-106a-5p	FZD6	miRNA_dn	-1.06349	4.3e-16	mRNA_dn	-0.561362	2.22345e-09	hsa-miR-106a-5p_FZD6	Gastric cancer
hsa-miR-1224-5p	WNT4	miRNA_dn	-2.95269	1.12e-19	mRNA_up	0.60545	0.00035257	hsa-miR-1224-5p_WNT4	Gastric cancer
hsa-miR-1224-5p	JUP	miRNA_dn	-2.95269	1.12e-19	mRNA_dn	-0.51005	0.00177485	hsa-miR-1224-5p_JUP	Gastric cancer
hsa-miR-1224-5p	WNT7B	miRNA_dn	-2.95269	1.12e-19	mRNA_up	0.723653	0.00373722	hsa-miR-1224-5p_WNT7B	Gastric cancer
hsa-miR-1224-5p	SHH	miRNA_dn	-2.95269	1.12e-19	mRNA_up	0.939045	1.0671e-05	hsa-miR-1224-5p_SHH	Gastric cancer
hsa-miR-124-3p	PIK3CD	miRNA_dn	-3.35029	3.73e-18	mRNA_up	0.394614	0.00114126	hsa-miR-124-3p_PIK3CD	Gastric cancer
hsa-miR-124-3p	GADD45A	miRNA_dn	-3.35029	3.73e-18	mRNA_up	0.162542	0.0358478	hsa-miR-124-3p_GADD45A	Gastric cancer
hsa-miR-124-3p	WNT5B	miRNA_dn	-3.35029	3.73e-18	mRNA_up	0.434594	0.00943857	hsa-miR-124-3p_WNT5B	Gastric cancer
hsa-miR-124-3p	BAX	miRNA_dn	-3.35029	3.73e-18	mRNA_up	0.288708	0.00030776	hsa-miR-124-3p_BAX	Gastric cancer
hsa-miR-125b-5p	AKT1	miRNA_up	1.47944	4.38e-28	mRNA_up	0.134637	0.0122843	hsa-miR-125b-5p_AKT1	Gastric cancer
hsa-miR-1269a	FGF19	miRNA_dn	-1.00229	0.0229912	mRNA_dn	-1.90923	7.33562e-08	hsa-miR-1269a_FGF19	Gastric cancer
hsa-miR-1323	CDH17	miRNA_dn	-5.38094	1.5e-25	mRNA_dn	-0.521344	0.0251214	hsa-miR-1323_CDH17	Gastric cancer
hsa-miR-133a-3p	BRAF	miRNA_up	1.92378	1.17e-18	mRNA_dn	-0.233077	0.0105197	hsa-miR-133a-3p_BRAF	Gastric cancer
hsa-miR-195-5p	MAP2K2	miRNA_up	1.0759	2.5e-21	mRNA_up	0.309297	1.06658e-07	hsa-miR-195-5p_MAP2K2	Gastric cancer
hsa-miR-195-5p	GADD45G	miRNA_up	1.0759	2.5e-21	mRNA_up	0.727729	1.84375e-07	hsa-miR-195-5p_GADD45G	Gastric cancer
hsa-miR-296-3p	MYC	miRNA_dn	-1.14163	4.18e-06	mRNA_dn	-0.553162	5.29083e-08	hsa-miR-296-3p_MYC	Gastric cancer
hsa-miR-383-5p	FRAT1	miRNA_up	1.56603	6.95e-09	mRNA_up	0.21938	0.0379848	hsa-miR-383-5p_FRAT1	Gastric cancer
hsa-miR-490-3p	RXRB	miRNA_up	2.45651	1.38e-13	mRNA_dn	-0.119357	0.04704	hsa-miR-490-3p_RXRB	Gastric cancer
hsa-miR-508-3p	CDX2	miRNA_dn	-1.57624	7.41e-11	mRNA_dn	-0.462979	0.0196977	hsa-miR-508-3p_CDX2	Gastric cancer
hsa-miR-520g-3p	RXRA	miRNA_dn	-5.92739	2.26e-32	mRNA_up	0.255718	0.000209964	hsa-miR-520g-3p_RXRA	Gastric cancer
hsa-let-7c-5p	VAV3	miRNA_up	1.42807	1.19e-18	mRNA_dn	-0.429824	0.0162861	hsa-let-7c-5p_VAV3	Rap1 signaling pathway
hsa-let-7c-5p	CALM1	miRNA_up	1.42807	1.19e-18	mRNA_up	0.189569	0.000857048	hsa-let-7c-5p_CALM1	Rap1 signaling pathway
hsa-let-7c-5p	ADCY9	miRNA_up	1.42807	1.19e-18	mRNA_up	0.507587	1.69903e-09	hsa-let-7c-5p_ADCY9	Rap1 signaling pathway
hsa-let-7c-5p	ITGB3	miRNA_up	1.42807	1.19e-18	mRNA_up	0.62624	3.27458e-05	hsa-let-7c-5p_ITGB3	Rap1 signaling pathway
hsa-let-7c-5p	PRKD3	miRNA_up	1.42807	1.19e-18	mRNA_dn	-0.213494	0.0160373	hsa-let-7c-5p_PRKD3	Rap1 signaling pathway
hsa-let-7c-5p	AFDN	miRNA_up	1.42807	1.19e-18	mRNA_dn	-0.384914	3.03497e-07	hsa-let-7c-5p_AFDN	Rap1 signaling pathway
hsa-let-7c-5p	RAC1	miRNA_up	1.42807	1.19e-18	mRNA_up	0.177829	0.00197369	hsa-let-7c-5p_RAC1	Rap1 signaling pathway
hsa-let-7c-5p	TLN1	miRNA_up	1.42807	1.19e-18	mRNA_up	0.603038	2.2172e-10	hsa-let-7c-5p_TLN1	Rap1 signaling pathway
hsa-let-7c-5p	GNAQ	miRNA_up	1.42807	1.19e-18	mRNA_up	0.192656	0.000812946	hsa-let-7c-5p_GNAQ	Rap1 signaling pathway
hsa-let-7c-5p	VAV2	miRNA_up	1.42807	1.19e-18	mRNA_dn	-0.238919	0.00248118	hsa-let-7c-5p_VAV2	Rap1 signaling pathway
hsa-miR-1-3p	CSF1	miRNA_up	2.07705	3.13e-20	mRNA_up	0.310478	0.000628193	hsa-miR-1-3p_CSF1	Rap1 signaling pathway
hsa-miR-1-3p	RAP1A	miRNA_up	2.07705	3.13e-20	mRNA_up	0.330084	2.00229e-06	hsa-miR-1-3p_RAP1A	Rap1 signaling pathway
hsa-miR-1-3p	RASSF5	miRNA_up	2.07705	3.13e-20	mRNA_up	0.375978	0.0003723	hsa-miR-1-3p_RASSF5	Rap1 signaling pathway
hsa-miR-1-3p	CTNND1	miRNA_up	2.07705	3.13e-20	mRNA_dn	-0.153239	0.0111003	hsa-miR-1-3p_CTNND1	Rap1 signaling pathway
hsa-miR-1-3p	VASP	miRNA_up	2.07705	3.13e-20	mRNA_up	0.262867	0.000114331	hsa-miR-1-3p_VASP	Rap1 signaling pathway
hsa-miR-1-3p	GNAI2	miRNA_up	2.07705	3.13e-20	mRNA_up	0.425709	2.9609e-12	hsa-miR-1-3p_GNAI2	Rap1 signaling pathway
hsa-miR-1-3p	RAPGEF2	miRNA_up	2.07705	3.13e-20	mRNA_dn	-0.236472	0.00547513	hsa-miR-1-3p_RAPGEF2	Rap1 signaling pathway
hsa-miR-1-3p	EFNA5	miRNA_up	2.07705	3.13e-20	mRNA_up	0.694972	4.13321e-07	hsa-miR-1-3p_EFNA5	Rap1 signaling pathway
hsa-miR-106a-5p	PRKCZ	miRNA_dn	-1.06349	4.3e-16	mRNA_dn	-0.209373	0.0137769	hsa-miR-106a-5p_PRKCZ	Rap1 signaling pathway
hsa-miR-106a-5p	GNAI3	miRNA_dn	-1.06349	4.3e-16	mRNA_dn	-0.257096	0.00318666	hsa-miR-106a-5p_GNAI3	Rap1 signaling pathway
hsa-miR-106a-5p	MAGI3	miRNA_dn	-1.06349	4.3e-16	mRNA_dn	-0.182385	0.0390045	hsa-miR-106a-5p_MAGI3	Rap1 signaling pathway
hsa-miR-106a-5p	EFNA3	miRNA_dn	-1.06349	4.3e-16	mRNA_dn	-0.490857	0.00253916	hsa-miR-106a-5p_EFNA3	Rap1 signaling pathway
hsa-miR-106a-5p	APBB1IP	miRNA_dn	-1.06349	4.3e-16	mRNA_up	0.468666	0.00124689	hsa-miR-106a-5p_APBB1IP	Rap1 signaling pathway
hsa-miR-106a-5p	ADCY6	miRNA_dn	-1.06349	4.3e-16	mRNA_dn	-0.287193	7.24407e-05	hsa-miR-106a-5p_ADCY6	Rap1 signaling pathway
hsa-miR-106a-5p	TLN2	miRNA_dn	-1.06349	4.3e-16	mRNA_dn	-0.277725	0.00685645	hsa-miR-106a-5p_TLN2	Rap1 signaling pathway
hsa-miR-106a-5p	ADCY3	miRNA_dn	-1.06349	4.3e-16	mRNA_dn	-0.275146	0.000117884	hsa-miR-106a-5p_ADCY3	Rap1 signaling pathway
hsa-miR-106a-5p	MRAS	miRNA_dn	-1.06349	4.3e-16	mRNA_up	0.664736	4.62534e-09	hsa-miR-106a-5p_MRAS	Rap1 signaling pathway
hsa-miR-106a-5p	PRKCI	miRNA_dn	-1.06349	4.3e-16	mRNA_dn	-0.235149	0.0120959	hsa-miR-106a-5p_PRKCI	Rap1 signaling pathway
hsa-miR-106a-5p	KIT	miRNA_dn	-1.06349	4.3e-16	mRNA_up	0.35496	0.0347917	hsa-miR-106a-5p_KIT	Rap1 signaling pathway
hsa-miR-106a-5p	F2R	miRNA_dn	-1.06349	4.3e-16	mRNA_up	0.279801	0.00650818	hsa-miR-106a-5p_F2R	Rap1 signaling pathway
hsa-miR-106a-5p	GNAI1	miRNA_dn	-1.06349	4.3e-16	mRNA_up	0.573232	7.60723e-07	hsa-miR-106a-5p_GNAI1	Rap1 signaling pathway
hsa-miR-1224-5p	BCAR1	miRNA_dn	-2.95269	1.12e-19	mRNA_up	0.274802	9.71695e-05	hsa-miR-1224-5p_BCAR1	Rap1 signaling pathway
hsa-miR-1224-5p	RRAS	miRNA_dn	-2.95269	1.12e-19	mRNA_up	1.08799	1.62361e-33	hsa-miR-1224-5p_RRAS	Rap1 signaling pathway
hsa-miR-124-3p	PGF	miRNA_dn	-3.35029	3.73e-18	mRNA_up	0.329648	0.00405172	hsa-miR-124-3p_PGF	Rap1 signaling pathway
hsa-miR-124-3p	ADORA2B	miRNA_dn	-3.35029	3.73e-18	mRNA_dn	-0.329948	0.0185156	hsa-miR-124-3p_ADORA2B	Rap1 signaling pathway
hsa-miR-124-3p	RAC2	miRNA_dn	-3.35029	3.73e-18	mRNA_up	0.436963	0.000294464	hsa-miR-124-3p_RAC2	Rap1 signaling pathway
hsa-miR-124-3p	CRKL	miRNA_dn	-3.35029	3.73e-18	mRNA_dn	-0.318475	8.46928e-09	hsa-miR-124-3p_CRKL	Rap1 signaling pathway
hsa-miR-1251-5p	EVL	miRNA_dn	-1.02516	0.00267597	mRNA_up	0.607291	7.40016e-09	hsa-miR-1251-5p_EVL	Rap1 signaling pathway
hsa-miR-125b-5p	ANGPT2	miRNA_up	1.47944	4.38e-28	mRNA_dn	-0.479892	0.000499511	hsa-miR-125b-5p_ANGPT2	Rap1 signaling pathway
hsa-miR-1323	FYB1	miRNA_dn	-5.38094	1.5e-25	mRNA_up	0.317803	0.0137776	hsa-miR-1323_FYB1	Rap1 signaling pathway
hsa-miR-133a-3p	EFNA4	miRNA_up	1.92378	1.17e-18	mRNA_dn	-0.20987	0.019911	hsa-miR-133a-3p_EFNA4	Rap1 signaling pathway
hsa-miR-133a-3p	VEGFC	miRNA_up	1.92378	1.17e-18	mRNA_up	0.665067	1.10696e-12	hsa-miR-133a-3p_VEGFC	Rap1 signaling pathway
hsa-miR-143-3p	NGFR	miRNA_up	1.24136	2.34e-16	mRNA_up	1.8584	4.89495e-14	hsa-miR-143-3p_NGFR	Rap1 signaling pathway
hsa-miR-195-5p	VEGFB	miRNA_up	1.0759	2.5e-21	mRNA_up	0.624881	4.12347e-17	hsa-miR-195-5p_VEGFB	Rap1 signaling pathway
hsa-miR-195-5p	ADCY4	miRNA_up	1.0759	2.5e-21	mRNA_up	0.544012	3.08225e-05	hsa-miR-195-5p_ADCY4	Rap1 signaling pathway
hsa-miR-296-3p	LPAR1	miRNA_dn	-1.14163	4.18e-06	mRNA_up	0.79479	1.55412e-10	hsa-miR-296-3p_LPAR1	Rap1 signaling pathway
hsa-miR-371a-3p	SIPA1	miRNA_up	2.59051	0.000126952	mRNA_up	0.50499	6.69929e-11	hsa-miR-371a-3p_SIPA1	Rap1 signaling pathway
hsa-miR-497-5p	ITGAL	miRNA_up	1.02588	1.55e-23	mRNA_up	0.314077	0.0381091	hsa-miR-497-5p_ITGAL	Rap1 signaling pathway
hsa-miR-516b-5p	RASGRP2	miRNA_dn	-5.16382	3.27e-25	mRNA_up	1.32676	1.11231e-13	hsa-miR-516b-5p_RASGRP2	Rap1 signaling pathway
hsa-miR-520a-5p	ITGAM	miRNA_dn	-6.42132	3.62e-32	mRNA_up	0.427131	0.00323719	hsa-miR-520a-5p_ITGAM	Rap1 signaling pathway
hsa-miR-522-3p	PFN1	miRNA_dn	-4.43011	3.14e-22	mRNA_up	0.28631	9.67844e-06	hsa-miR-522-3p_PFN1	Rap1 signaling pathway
hsa-let-7c-5p	ESPL1	miRNA_up	1.42807	1.19e-18	mRNA_dn	-0.728106	1.99698e-16	hsa-let-7c-5p_ESPL1	Cell cycle
hsa-let-7c-5p	YWHAE	miRNA_up	1.42807	1.19e-18	mRNA_dn	-0.252854	3.07057e-05	hsa-let-7c-5p_YWHAE	Cell cycle
hsa-let-7c-5p	CDC6	miRNA_up	1.42807	1.19e-18	mRNA_dn	-0.919891	3.10887e-08	hsa-let-7c-5p_CDC6	Cell cycle
hsa-let-7c-5p	ORC2	miRNA_up	1.42807	1.19e-18	mRNA_dn	-0.314715	4.36875e-06	hsa-let-7c-5p_ORC2	Cell cycle
hsa-let-7c-5p	PCNA	miRNA_up	1.42807	1.19e-18	mRNA_dn	-0.61365	9.73628e-15	hsa-let-7c-5p_PCNA	Cell cycle
hsa-let-7c-5p	CDC25B	miRNA_up	1.42807	1.19e-18	mRNA_dn	-0.449378	1.26176e-05	hsa-let-7c-5p_CDC25B	Cell cycle
hsa-let-7c-5p	CDC25A	miRNA_up	1.42807	1.19e-18	mRNA_dn	-0.845515	1.10776e-20	hsa-let-7c-5p_CDC25A	Cell cycle
hsa-let-7c-5p	CDC23	miRNA_up	1.42807	1.19e-18	mRNA_dn	-0.397685	1.61531e-11	hsa-let-7c-5p_CDC23	Cell cycle
hsa-let-7c-5p	CDC14B	miRNA_up	1.42807	1.19e-18	mRNA_dn	-0.28652	0.00234465	hsa-let-7c-5p_CDC14B	Cell cycle
hsa-let-7c-5p	SMC1A	miRNA_up	1.42807	1.19e-18	mRNA_dn	-0.505594	4.02323e-18	hsa-let-7c-5p_SMC1A	Cell cycle
hsa-miR-1-3p	WEE1	miRNA_up	2.07705	3.13e-20	mRNA_dn	-0.588281	1.13317e-11	hsa-miR-1-3p_WEE1	Cell cycle
hsa-miR-1-3p	ORC6	miRNA_up	2.07705	3.13e-20	mRNA_dn	-0.740171	2.97559e-14	hsa-miR-1-3p_ORC6	Cell cycle
hsa-miR-1-3p	YWHAQ	miRNA_up	2.07705	3.13e-20	mRNA_dn	-0.264011	3.44286e-09	hsa-miR-1-3p_YWHAQ	Cell cycle
hsa-miR-1-3p	STAG1	miRNA_up	2.07705	3.13e-20	mRNA_dn	-0.429102	2.76011e-09	hsa-miR-1-3p_STAG1	Cell cycle
hsa-miR-1-3p	CDC25C	miRNA_up	2.07705	3.13e-20	mRNA_dn	-0.643833	5.32372e-12	hsa-miR-1-3p_CDC25C	Cell cycle
hsa-miR-1-3p	PRKDC	miRNA_up	2.07705	3.13e-20	mRNA_dn	-0.750616	1.78301e-31	hsa-miR-1-3p_PRKDC	Cell cycle
hsa-miR-1-3p	YWHAZ	miRNA_up	2.07705	3.13e-20	mRNA_dn	-0.252334	5.56227e-05	hsa-miR-1-3p_YWHAZ	Cell cycle
hsa-miR-1-3p	RAD21	miRNA_up	2.07705	3.13e-20	mRNA_dn	-0.672922	7.55854e-36	hsa-miR-1-3p_RAD21	Cell cycle
hsa-miR-1-3p	STAG2	miRNA_up	2.07705	3.13e-20	mRNA_dn	-0.368772	2.35819e-12	hsa-miR-1-3p_STAG2	Cell cycle
hsa-miR-106a-5p	PKMYT1	miRNA_dn	-1.06349	4.3e-16	mRNA_dn	-0.277869	0.00620655	hsa-miR-106a-5p_PKMYT1	Cell cycle
hsa-miR-106a-5p	CDC27	miRNA_dn	-1.06349	4.3e-16	mRNA_dn	-0.325528	5.98937e-10	hsa-miR-106a-5p_CDC27	Cell cycle
hsa-miR-106a-5p	ANAPC11	miRNA_dn	-1.06349	4.3e-16	mRNA_up	0.153246	0.0449756	hsa-miR-106a-5p_ANAPC11	Cell cycle
hsa-miR-106a-5p	BUB1	miRNA_dn	-1.06349	4.3e-16	mRNA_dn	-0.908126	2.63734e-38	hsa-miR-106a-5p_BUB1	Cell cycle
hsa-miR-106a-5p	MCM3	miRNA_dn	-1.06349	4.3e-16	mRNA_dn	-0.512259	2.94233e-14	hsa-miR-106a-5p_MCM3	Cell cycle
hsa-miR-106a-5p	MCM4	miRNA_dn	-1.06349	4.3e-16	mRNA_dn	-0.730769	4.59161e-21	hsa-miR-106a-5p_MCM4	Cell cycle
hsa-miR-106a-5p	ABL1	miRNA_dn	-1.06349	4.3e-16	mRNA_up	0.24401	0.000941022	hsa-miR-106a-5p_ABL1	Cell cycle
hsa-miR-1224-5p	MCM2	miRNA_dn	-2.95269	1.12e-19	mRNA_dn	-0.693715	5.326e-19	hsa-miR-1224-5p_MCM2	Cell cycle
hsa-miR-1224-5p	MAD1L1	miRNA_dn	-2.95269	1.12e-19	mRNA_up	0.317296	0.000228086	hsa-miR-1224-5p_MAD1L1	Cell cycle
hsa-miR-1224-5p	YWHAG	miRNA_dn	-2.95269	1.12e-19	mRNA_dn	-0.17886	0.00335925	hsa-miR-1224-5p_YWHAG	Cell cycle
hsa-miR-124-3p	ANAPC7	miRNA_dn	-3.35029	3.73e-18	mRNA_dn	-0.277568	2.53752e-05	hsa-miR-124-3p_ANAPC7	Cell cycle
hsa-miR-124-3p	MCM7	miRNA_dn	-3.35029	3.73e-18	mRNA_dn	-0.388537	4.29371e-05	hsa-miR-124-3p_MCM7	Cell cycle
hsa-miR-124-3p	DBF4	miRNA_dn	-3.35029	3.73e-18	mRNA_dn	-0.50882	5.32008e-09	hsa-miR-124-3p_DBF4	Cell cycle
hsa-miR-1251-5p	CDC7	miRNA_dn	-1.02516	0.00267597	mRNA_dn	-0.893811	1.28038e-25	hsa-miR-1251-5p_CDC7	Cell cycle
hsa-miR-125b-5p	HDAC1	miRNA_up	1.47944	4.38e-28	mRNA_dn	-0.235133	2.76832e-05	hsa-miR-125b-5p_HDAC1	Cell cycle
hsa-miR-125b-5p	ANAPC16	miRNA_up	1.47944	4.38e-28	mRNA_up	0.308508	2.90594e-06	hsa-miR-125b-5p_ANAPC16	Cell cycle
hsa-miR-125b-5p	ORC4	miRNA_up	1.47944	4.38e-28	mRNA_dn	-0.377224	1.67782e-05	hsa-miR-125b-5p_ORC4	Cell cycle
hsa-miR-125b-5p	ORC5	miRNA_up	1.47944	4.38e-28	mRNA_dn	-0.437315	2.79809e-08	hsa-miR-125b-5p_ORC5	Cell cycle
hsa-miR-1323	ORC1	miRNA_dn	-5.38094	1.5e-25	mRNA_dn	-0.921938	1.43155e-31	hsa-miR-1323_ORC1	Cell cycle
hsa-miR-1323	SMC3	miRNA_dn	-5.38094	1.5e-25	mRNA_dn	-0.458478	1.10351e-15	hsa-miR-1323_SMC3	Cell cycle
hsa-miR-1323	BUB3	miRNA_dn	-5.38094	1.5e-25	mRNA_dn	-0.411189	1.80861e-12	hsa-miR-1323_BUB3	Cell cycle
hsa-miR-1323	MAD2L1	miRNA_dn	-5.38094	1.5e-25	mRNA_dn	-0.867145	3.52063e-27	hsa-miR-1323_MAD2L1	Cell cycle
hsa-miR-1323	HDAC2	miRNA_dn	-5.38094	1.5e-25	mRNA_dn	-0.380589	6.55674e-10	hsa-miR-1323_HDAC2	Cell cycle
hsa-miR-1323	TTK	miRNA_dn	-5.38094	1.5e-25	mRNA_dn	-1.04655	2.17944e-42	hsa-miR-1323_TTK	Cell cycle
hsa-miR-1323	ORC3	miRNA_dn	-5.38094	1.5e-25	mRNA_dn	-0.487236	3.96267e-16	hsa-miR-1323_ORC3	Cell cycle
hsa-miR-133a-3p	ANAPC1	miRNA_up	1.92378	1.17e-18	mRNA_dn	-0.580659	5.86287e-10	hsa-miR-133a-3p_ANAPC1	Cell cycle
hsa-miR-143-3p	CDC16	miRNA_up	1.24136	2.34e-16	mRNA_dn	-0.268205	1.93001e-06	hsa-miR-143-3p_CDC16	Cell cycle
hsa-miR-143-3p	MCM5	miRNA_up	1.24136	2.34e-16	mRNA_dn	-0.279251	0.000201942	hsa-miR-143-3p_MCM5	Cell cycle
hsa-miR-145-5p	ANAPC5	miRNA_up	1.38497	6.5e-20	mRNA_dn	-0.252796	1.04406e-05	hsa-miR-145-5p_ANAPC5	Cell cycle
hsa-miR-196b-5p	ANAPC4	miRNA_dn	-1.29422	3.7e-11	mRNA_dn	-0.333446	0.000357464	hsa-miR-196b-5p_ANAPC4	Cell cycle
hsa-miR-302a-3p	MCM6	miRNA_up	4.14507	3.04e-09	mRNA_dn	-0.625096	1.64649e-26	hsa-miR-302a-3p_MCM6	Cell cycle
hsa-miR-371a-5p	CDC45	miRNA_up	2.12772	0.00107627	mRNA_dn	-0.66983	2.20577e-16	hsa-miR-371a-5p_CDC45	Cell cycle
hsa-miR-515-5p	BUB1B	miRNA_dn	-4.17176	4.59e-18	mRNA_dn	-0.965853	9.99573e-43	hsa-miR-515-5p_BUB1B	Cell cycle
hsa-miR-520d-5p	PTTG1	miRNA_dn	-4.4767	5.26e-26	mRNA_dn	-0.356164	0.000331925	hsa-miR-520d-5p_PTTG1	Cell cycle
hsa-let-7c-5p	ZFP36L1	miRNA_up	1.42807	1.19e-18	mRNA_up	0.419436	5.05488e-09	hsa-let-7c-5p_ZFP36L1	Cellular senescence
hsa-let-7c-5p	RAD50	miRNA_up	1.42807	1.19e-18	mRNA_dn	-0.165236	0.00693097	hsa-let-7c-5p_RAD50	Cellular senescence
hsa-let-7c-5p	HIPK2	miRNA_up	1.42807	1.19e-18	mRNA_up	0.210239	0.0384892	hsa-let-7c-5p_HIPK2	Cellular senescence
hsa-miR-1-3p	RBBP4	miRNA_up	2.07705	3.13e-20	mRNA_dn	-0.370775	3.3096e-15	hsa-miR-1-3p_RBBP4	Cellular senescence
hsa-miR-1-3p	HIPK1	miRNA_up	2.07705	3.13e-20	mRNA_dn	-0.18685	0.00750388	hsa-miR-1-3p_HIPK1	Cellular senescence
hsa-miR-1-3p	ETS1	miRNA_up	2.07705	3.13e-20	mRNA_up	0.243909	0.010966	hsa-miR-1-3p_ETS1	Cellular senescence
hsa-miR-1-3p	NBN	miRNA_up	2.07705	3.13e-20	mRNA_dn	-0.523776	1.10086e-21	hsa-miR-1-3p_NBN	Cellular senescence
hsa-miR-106a-5p	PPP1CC	miRNA_dn	-1.06349	4.3e-16	mRNA_dn	-0.168749	0.000436707	hsa-miR-106a-5p_PPP1CC	Cellular senescence
hsa-miR-106a-5p	LIN52	miRNA_dn	-1.06349	4.3e-16	mRNA_dn	-0.20403	0.04646	hsa-miR-106a-5p_LIN52	Cellular senescence
hsa-miR-106a-5p	TRPM7	miRNA_dn	-1.06349	4.3e-16	mRNA_dn	-0.400033	1.44739e-08	hsa-miR-106a-5p_TRPM7	Cellular senescence
hsa-miR-106a-5p	LIN54	miRNA_dn	-1.06349	4.3e-16	mRNA_dn	-0.425367	1.85389e-07	hsa-miR-106a-5p_LIN54	Cellular senescence
hsa-miR-106a-5p	RAD1	miRNA_dn	-1.06349	4.3e-16	mRNA_dn	-0.312016	0.000164144	hsa-miR-106a-5p_RAD1	Cellular senescence
hsa-miR-106a-5p	FBXW11	miRNA_dn	-1.06349	4.3e-16	mRNA_dn	-0.188476	0.00471501	hsa-miR-106a-5p_FBXW11	Cellular senescence
hsa-miR-106a-5p	SQSTM1	miRNA_dn	-1.06349	4.3e-16	mRNA_up	0.465644	7.74268e-10	hsa-miR-106a-5p_SQSTM1	Cellular senescence
hsa-miR-1224-5p	FOXM1	miRNA_dn	-2.95269	1.12e-19	mRNA_dn	-0.540099	2.42323e-08	hsa-miR-1224-5p_FOXM1	Cellular senescence
hsa-miR-1224-5p	VDAC3	miRNA_dn	-2.95269	1.12e-19	mRNA_dn	-0.309455	4.13691e-05	hsa-miR-1224-5p_VDAC3	Cellular senescence
hsa-miR-124-3p	NFATC4	miRNA_dn	-3.35029	3.73e-18	mRNA_up	0.838055	5.09418e-11	hsa-miR-124-3p_NFATC4	Cellular senescence
hsa-miR-124-3p	HLA-E	miRNA_dn	-3.35029	3.73e-18	mRNA_up	0.336066	6.6323e-06	hsa-miR-124-3p_HLA-E	Cellular senescence
hsa-miR-124-3p	GATA4	miRNA_dn	-3.35029	3.73e-18	mRNA_up	0.42685	0.0345492	hsa-miR-124-3p_GATA4	Cellular senescence
hsa-miR-1323	LIN9	miRNA_dn	-5.38094	1.5e-25	mRNA_dn	-0.652531	1.23144e-13	hsa-miR-1323_LIN9	Cellular senescence
hsa-miR-143-3p	MYBL2	miRNA_up	1.24136	2.34e-16	mRNA_dn	-0.481408	2.28158e-05	hsa-miR-143-3p_MYBL2	Cellular senescence
hsa-miR-143-3p	HLA-C	miRNA_up	1.24136	2.34e-16	mRNA_up	0.251573	0.0111284	hsa-miR-143-3p_HLA-C	Cellular senescence
hsa-miR-143-3p	HLA-B	miRNA_up	1.24136	2.34e-16	mRNA_up	0.248266	0.0163261	hsa-miR-143-3p_HLA-B	Cellular senescence
hsa-miR-143-3p	HLA-A	miRNA_up	1.24136	2.34e-16	mRNA_up	0.345001	0.000320465	hsa-miR-143-3p_HLA-A	Cellular senescence
hsa-miR-145-5p	CACNA1D	miRNA_up	1.38497	6.5e-20	mRNA_dn	-0.340339	0.0157852	hsa-miR-145-5p_CACNA1D	Cellular senescence
hsa-miR-449a	SLC25A4	miRNA_dn	-1.54737	4.91e-07	mRNA_up	0.474038	1.35318e-05	hsa-miR-449a_SLC25A4	Cellular senescence
hsa-miR-515-5p	SLC25A5	miRNA_dn	-4.17176	4.59e-18	mRNA_dn	-0.204761	0.00865721	hsa-miR-515-5p_SLC25A5	Cellular senescence
hsa-let-7c-5p	PPP1R12B	miRNA_up	1.42807	1.19e-18	mRNA_up	2.00368	5.28136e-24	hsa-let-7c-5p_PPP1R12B	Proteoglycans in cancer
hsa-let-7c-5p	IGF2	miRNA_up	1.42807	1.19e-18	mRNA_dn	-1.45907	3.25553e-07	hsa-let-7c-5p_IGF2	Proteoglycans in cancer
hsa-let-7c-5p	PAK1	miRNA_up	1.42807	1.19e-18	mRNA_dn	-0.205323	0.0017683	hsa-let-7c-5p_PAK1	Proteoglycans in cancer
hsa-let-7c-5p	CD44	miRNA_up	1.42807	1.19e-18	mRNA_up	0.332778	0.0243768	hsa-let-7c-5p_CD44	Proteoglycans in cancer
hsa-let-7c-5p	CBL	miRNA_up	1.42807	1.19e-18	mRNA_dn	-0.403795	1.01377e-07	hsa-let-7c-5p_CBL	Proteoglycans in cancer
hsa-let-7c-5p	ARHGEF12	miRNA_up	1.42807	1.19e-18	mRNA_dn	-0.200954	0.000583259	hsa-let-7c-5p_ARHGEF12	Proteoglycans in cancer
hsa-let-7c-5p	COL1A1	miRNA_up	1.42807	1.19e-18	mRNA_up	0.740436	7.10975e-07	hsa-let-7c-5p_COL1A1	Proteoglycans in cancer
hsa-let-7c-5p	COL1A2	miRNA_up	1.42807	1.19e-18	mRNA_up	0.554558	7.047e-05	hsa-let-7c-5p_COL1A2	Proteoglycans in cancer
hsa-let-7c-5p	SDC2	miRNA_up	1.42807	1.19e-18	mRNA_up	0.557561	1.3103e-07	hsa-let-7c-5p_SDC2	Proteoglycans in cancer
hsa-let-7c-5p	FLNA	miRNA_up	1.42807	1.19e-18	mRNA_up	1.641	5.32287e-22	hsa-let-7c-5p_FLNA	Proteoglycans in cancer
hsa-let-7c-5p	MSN	miRNA_up	1.42807	1.19e-18	mRNA_up	0.468987	4.64312e-07	hsa-let-7c-5p_MSN	Proteoglycans in cancer
hsa-miR-1-3p	HSPG2	miRNA_up	2.07705	3.13e-20	mRNA_up	0.664386	4.14099e-09	hsa-miR-1-3p_HSPG2	Proteoglycans in cancer
hsa-miR-1-3p	PRKACB	miRNA_up	2.07705	3.13e-20	mRNA_up	0.498118	3.42054e-06	hsa-miR-1-3p_PRKACB	Proteoglycans in cancer
hsa-miR-1-3p	CAMK2G	miRNA_up	2.07705	3.13e-20	mRNA_up	0.408393	3.02853e-06	hsa-miR-1-3p_CAMK2G	Proteoglycans in cancer
hsa-miR-1-3p	ITGA5	miRNA_up	2.07705	3.13e-20	mRNA_up	0.93778	2.73182e-13	hsa-miR-1-3p_ITGA5	Proteoglycans in cancer
hsa-miR-1-3p	MMP2	miRNA_up	2.07705	3.13e-20	mRNA_up	0.806863	1.18743e-08	hsa-miR-1-3p_MMP2	Proteoglycans in cancer
hsa-miR-1-3p	DDX5	miRNA_up	2.07705	3.13e-20	mRNA_dn	-0.148112	0.00259082	hsa-miR-1-3p_DDX5	Proteoglycans in cancer
hsa-miR-1-3p	PRKACA	miRNA_up	2.07705	3.13e-20	mRNA_up	0.322767	5.44085e-10	hsa-miR-1-3p_PRKACA	Proteoglycans in cancer
hsa-miR-1-3p	ROCK2	miRNA_up	2.07705	3.13e-20	mRNA_dn	-0.298832	2.51546e-06	hsa-miR-1-3p_ROCK2	Proteoglycans in cancer
hsa-miR-1-3p	SDC4	miRNA_up	2.07705	3.13e-20	mRNA_up	0.261503	0.0155551	hsa-miR-1-3p_SDC4	Proteoglycans in cancer
hsa-miR-1-3p	TIMP3	miRNA_up	2.07705	3.13e-20	mRNA_up	0.965284	1.7565e-11	hsa-miR-1-3p_TIMP3	Proteoglycans in cancer
hsa-miR-1-3p	CAV2	miRNA_up	2.07705	3.13e-20	mRNA_up	0.595551	3.81198e-05	hsa-miR-1-3p_CAV2	Proteoglycans in cancer
hsa-miR-100-5p	FLNB	miRNA_up	1.22692	6.37e-17	mRNA_dn	-0.20444	0.0446615	hsa-miR-100-5p_FLNB	Proteoglycans in cancer
hsa-miR-106a-5p	PPP1R12A	miRNA_dn	-1.06349	4.3e-16	mRNA_up	0.267411	0.00261702	hsa-miR-106a-5p_PPP1R12A	Proteoglycans in cancer
hsa-miR-106a-5p	CAV1	miRNA_dn	-1.06349	4.3e-16	mRNA_up	1.22768	2.88333e-16	hsa-miR-106a-5p_CAV1	Proteoglycans in cancer
hsa-miR-106a-5p	PTK2	miRNA_dn	-1.06349	4.3e-16	mRNA_dn	-0.242715	1.31395e-05	hsa-miR-106a-5p_PTK2	Proteoglycans in cancer
hsa-miR-1224-5p	CD63	miRNA_dn	-2.95269	1.12e-19	mRNA_up	0.48154	3.2355e-17	hsa-miR-1224-5p_CD63	Proteoglycans in cancer
hsa-miR-1224-5p	LUM	miRNA_dn	-2.95269	1.12e-19	mRNA_up	0.559167	4.16899e-05	hsa-miR-1224-5p_LUM	Proteoglycans in cancer
hsa-miR-1224-5p	TWIST1	miRNA_dn	-2.95269	1.12e-19	mRNA_up	0.802797	1.108e-07	hsa-miR-1224-5p_TWIST1	Proteoglycans in cancer
hsa-miR-1224-5p	SMO	miRNA_dn	-2.95269	1.12e-19	mRNA_up	0.389576	0.00484229	hsa-miR-1224-5p_SMO	Proteoglycans in cancer
hsa-miR-124-3p	TFAP4	miRNA_dn	-3.35029	3.73e-18	mRNA_dn	-0.213957	0.0279523	hsa-miR-124-3p_TFAP4	Proteoglycans in cancer
hsa-miR-124-3p	NUDT16L1	miRNA_dn	-3.35029	3.73e-18	mRNA_up	0.189128	0.00420434	hsa-miR-124-3p_NUDT16L1	Proteoglycans in cancer
hsa-miR-124-3p	ARHGEF1	miRNA_dn	-3.35029	3.73e-18	mRNA_up	0.145333	0.0466178	hsa-miR-124-3p_ARHGEF1	Proteoglycans in cancer
hsa-miR-124-3p	ITGB5	miRNA_dn	-3.35029	3.73e-18	mRNA_up	0.284203	0.000188856	hsa-miR-124-3p_ITGB5	Proteoglycans in cancer
hsa-miR-124-3p	FLNC	miRNA_dn	-3.35029	3.73e-18	mRNA_up	2.8706	4.98686e-28	hsa-miR-124-3p_FLNC	Proteoglycans in cancer
hsa-miR-1251-5p	EIF4B	miRNA_dn	-1.02516	0.00267597	mRNA_dn	-0.176541	0.00368241	hsa-miR-1251-5p_EIF4B	Proteoglycans in cancer
hsa-miR-1269a	VTN	miRNA_dn	-1.00229	0.0229912	mRNA_up	1.93287	2.48289e-07	hsa-miR-1269a_VTN	Proteoglycans in cancer
hsa-miR-133a-3p	PPP1R12C	miRNA_up	1.92378	1.17e-18	mRNA_up	0.660696	2.83138e-13	hsa-miR-133a-3p_PPP1R12C	Proteoglycans in cancer
hsa-miR-216b-5p	DROSHA	miRNA_dn	-2.10458	2.21e-12	mRNA_dn	-0.386534	8.87617e-11	hsa-miR-216b-5p_DROSHA	Proteoglycans in cancer
hsa-miR-520d-5p	PLAUR	miRNA_dn	-4.4767	5.26e-26	mRNA_up	0.234577	0.0433788	hsa-miR-520d-5p_PLAUR	Proteoglycans in cancer
hsa-miR-577	HPSE	miRNA_dn	-1.13596	2.69e-10	mRNA_dn	-0.360002	0.00216345	hsa-miR-577_HPSE	Proteoglycans in cancer
hsa-let-7c-5p	DUSP16	miRNA_up	1.42807	1.19e-18	mRNA_dn	-0.515638	1.62111e-10	hsa-let-7c-5p_DUSP16	MAPK signaling pathway
hsa-let-7c-5p	DUSP3	miRNA_up	1.42807	1.19e-18	mRNA_up	0.485355	4.55624e-10	hsa-let-7c-5p_DUSP3	MAPK signaling pathway
hsa-let-7c-5p	TAOK1	miRNA_up	1.42807	1.19e-18	mRNA_dn	-0.28557	1.04725e-05	hsa-let-7c-5p_TAOK1	MAPK signaling pathway
hsa-let-7c-5p	MAP2K7	miRNA_up	1.42807	1.19e-18	mRNA_up	0.130584	0.032891	hsa-let-7c-5p_MAP2K7	MAPK signaling pathway
hsa-let-7c-5p	MAP4K3	miRNA_up	1.42807	1.19e-18	mRNA_dn	-0.207433	0.00411914	hsa-let-7c-5p_MAP4K3	MAPK signaling pathway
hsa-let-7c-5p	MAP3K20	miRNA_up	1.42807	1.19e-18	mRNA_up	0.547781	1.87612e-05	hsa-let-7c-5p_MAP3K20	MAPK signaling pathway
hsa-let-7c-5p	DUSP1	miRNA_up	1.42807	1.19e-18	mRNA_up	0.991367	4.64338e-15	hsa-let-7c-5p_DUSP1	MAPK signaling pathway
hsa-let-7c-5p	MAP3K1	miRNA_up	1.42807	1.19e-18	mRNA_dn	-0.225853	0.00320858	hsa-let-7c-5p_MAP3K1	MAPK signaling pathway
hsa-let-7c-5p	RPS6KA2	miRNA_up	1.42807	1.19e-18	mRNA_up	0.502604	2.19661e-09	hsa-let-7c-5p_RPS6KA2	MAPK signaling pathway
hsa-let-7c-5p	MAP3K4	miRNA_up	1.42807	1.19e-18	mRNA_dn	-0.366264	5.84732e-06	hsa-let-7c-5p_MAP3K4	MAPK signaling pathway
hsa-let-7c-5p	RPS6KA3	miRNA_up	1.42807	1.19e-18	mRNA_dn	-0.236353	0.000647768	hsa-let-7c-5p_RPS6KA3	MAPK signaling pathway
hsa-miR-1-3p	DUSP5	miRNA_up	2.07705	3.13e-20	mRNA_up	0.644641	9.25032e-07	hsa-miR-1-3p_DUSP5	MAPK signaling pathway
hsa-miR-1-3p	TAOK3	miRNA_up	2.07705	3.13e-20	mRNA_up	0.182448	0.00505071	hsa-miR-1-3p_TAOK3	MAPK signaling pathway
hsa-miR-1-3p	JUND	miRNA_up	2.07705	3.13e-20	mRNA_up	0.517816	2.46356e-11	hsa-miR-1-3p_JUND	MAPK signaling pathway
hsa-miR-1-3p	ATF2	miRNA_up	2.07705	3.13e-20	mRNA_dn	-0.13747	0.0154289	hsa-miR-1-3p_ATF2	MAPK signaling pathway
hsa-miR-1-3p	IL1R1	miRNA_up	2.07705	3.13e-20	mRNA_up	0.677609	2.40447e-10	hsa-miR-1-3p_IL1R1	MAPK signaling pathway
hsa-miR-1-3p	RASA1	miRNA_up	2.07705	3.13e-20	mRNA_dn	-0.175134	0.00695542	hsa-miR-1-3p_RASA1	MAPK signaling pathway
hsa-miR-1-3p	GNA12	miRNA_up	2.07705	3.13e-20	mRNA_up	0.119245	0.0465882	hsa-miR-1-3p_GNA12	MAPK signaling pathway
hsa-miR-106a-5p	STMN1	miRNA_dn	-1.06349	4.3e-16	mRNA_dn	-0.498641	6.36301e-10	hsa-miR-106a-5p_STMN1	MAPK signaling pathway
hsa-miR-106a-5p	HSPA6	miRNA_dn	-1.06349	4.3e-16	mRNA_up	0.750105	0.00130215	hsa-miR-106a-5p_HSPA6	MAPK signaling pathway
hsa-miR-106a-5p	MAP3K8	miRNA_dn	-1.06349	4.3e-16	mRNA_dn	-0.451982	1.39947e-05	hsa-miR-106a-5p_MAP3K8	MAPK signaling pathway
hsa-miR-106a-5p	HSPA8	miRNA_dn	-1.06349	4.3e-16	mRNA_dn	-0.411405	1.37604e-08	hsa-miR-106a-5p_HSPA8	MAPK signaling pathway
hsa-miR-106a-5p	RPS6KA4	miRNA_dn	-1.06349	4.3e-16	mRNA_up	0.158087	0.0284679	hsa-miR-106a-5p_RPS6KA4	MAPK signaling pathway
hsa-miR-106a-5p	MAP3K12	miRNA_dn	-1.06349	4.3e-16	mRNA_up	0.417892	0.00147496	hsa-miR-106a-5p_MAP3K12	MAPK signaling pathway
hsa-miR-106a-5p	MAPK8IP2	miRNA_dn	-1.06349	4.3e-16	mRNA_up	0.557801	0.00630778	hsa-miR-106a-5p_MAPK8IP2	MAPK signaling pathway
hsa-miR-106a-5p	PAK2	miRNA_dn	-1.06349	4.3e-16	mRNA_dn	-0.188993	0.000133266	hsa-miR-106a-5p_PAK2	MAPK signaling pathway
hsa-miR-106a-5p	EREG	miRNA_dn	-1.06349	4.3e-16	mRNA_dn	-1.00957	0.000127917	hsa-miR-106a-5p_EREG	MAPK signaling pathway
hsa-miR-106a-5p	MEF2C	miRNA_dn	-1.06349	4.3e-16	mRNA_up	0.600182	1.39659e-06	hsa-miR-106a-5p_MEF2C	MAPK signaling pathway
hsa-miR-106a-5p	CACNA2D1	miRNA_dn	-1.06349	4.3e-16	mRNA_up	0.755792	3.87263e-06	hsa-miR-106a-5p_CACNA2D1	MAPK signaling pathway
hsa-miR-106a-5p	STK3	miRNA_dn	-1.06349	4.3e-16	mRNA_dn	-0.305767	0.00177082	hsa-miR-106a-5p_STK3	MAPK signaling pathway
hsa-miR-1224-5p	SRF	miRNA_dn	-2.95269	1.12e-19	mRNA_up	0.310227	9.45887e-05	hsa-miR-1224-5p_SRF	MAPK signaling pathway
hsa-miR-124-3p	ARRB1	miRNA_dn	-3.35029	3.73e-18	mRNA_up	0.22321	0.0103166	hsa-miR-124-3p_ARRB1	MAPK signaling pathway
hsa-miR-124-3p	HSPA2	miRNA_dn	-3.35029	3.73e-18	mRNA_up	1.02996	1.04465e-11	hsa-miR-124-3p_HSPA2	MAPK signaling pathway
hsa-miR-124-3p	MAP2K4	miRNA_dn	-3.35029	3.73e-18	mRNA_dn	-0.253992	0.000303807	hsa-miR-124-3p_MAP2K4	MAPK signaling pathway
hsa-miR-124-3p	PPM1B	miRNA_dn	-3.35029	3.73e-18	mRNA_dn	-0.181848	0.00543979	hsa-miR-124-3p_PPM1B	MAPK signaling pathway
hsa-miR-1251-5p	MAPKAPK5	miRNA_dn	-1.02516	0.00267597	mRNA_dn	-0.249255	0.0109327	hsa-miR-1251-5p_MAPKAPK5	MAPK signaling pathway
hsa-miR-1251-5p	MAPKAPK3	miRNA_dn	-1.02516	0.00267597	mRNA_dn	-0.141199	0.0269452	hsa-miR-1251-5p_MAPKAPK3	MAPK signaling pathway
hsa-miR-1269a	HSPA1A	miRNA_dn	-1.00229	0.0229912	mRNA_up	0.676621	9.97498e-05	hsa-miR-1269a_HSPA1A	MAPK signaling pathway
hsa-miR-143-3p	ECSIT	miRNA_up	1.24136	2.34e-16	mRNA_up	0.211317	0.00345581	hsa-miR-143-3p_ECSIT	MAPK signaling pathway
hsa-miR-145-5p	PLA2G4A	miRNA_up	1.38497	6.5e-20	mRNA_dn	-0.646801	1.21391e-05	hsa-miR-145-5p_PLA2G4A	MAPK signaling pathway
hsa-miR-195-5p	PPP5C	miRNA_up	1.0759	2.5e-21	mRNA_dn	-0.187184	0.00176943	hsa-miR-195-5p_PPP5C	MAPK signaling pathway
hsa-miR-216b-5p	CACNA1H	miRNA_dn	-2.10458	2.21e-12	mRNA_up	1.31565	3.19859e-14	hsa-miR-216b-5p_CACNA1H	MAPK signaling pathway
hsa-miR-577	HSPB1	miRNA_dn	-1.13596	2.69e-10	mRNA_up	1.39072	9.37114e-27	hsa-miR-577_HSPB1	MAPK signaling pathway
hsa-let-7c-5p	GNG5	miRNA_up	1.42807	1.19e-18	mRNA_up	0.236371	0.000335417	hsa-let-7c-5p_GNG5	PI3K-Akt signaling pathway
hsa-let-7c-5p	PKN2	miRNA_up	1.42807	1.19e-18	mRNA_dn	-0.427144	8.02248e-14	hsa-let-7c-5p_PKN2	PI3K-Akt signaling pathway
hsa-let-7c-5p	PIK3AP1	miRNA_up	1.42807	1.19e-18	mRNA_dn	-0.266686	0.0151662	hsa-let-7c-5p_PIK3AP1	PI3K-Akt signaling pathway
hsa-let-7c-5p	COL4A1	miRNA_up	1.42807	1.19e-18	mRNA_up	0.257171	0.0162577	hsa-let-7c-5p_COL4A1	PI3K-Akt signaling pathway
hsa-let-7c-5p	COL4A2	miRNA_up	1.42807	1.19e-18	mRNA_up	0.623762	2.72835e-09	hsa-let-7c-5p_COL4A2	PI3K-Akt signaling pathway
hsa-let-7c-5p	ITGA11	miRNA_up	1.42807	1.19e-18	mRNA_up	0.528615	0.000256777	hsa-let-7c-5p_ITGA11	PI3K-Akt signaling pathway
hsa-let-7c-5p	COL6A3	miRNA_up	1.42807	1.19e-18	mRNA_up	0.538757	3.59742e-05	hsa-let-7c-5p_COL6A3	PI3K-Akt signaling pathway
hsa-let-7c-5p	GNB4	miRNA_up	1.42807	1.19e-18	mRNA_up	0.340045	0.00197433	hsa-let-7c-5p_GNB4	PI3K-Akt signaling pathway
hsa-let-7c-5p	PRLR	miRNA_up	1.42807	1.19e-18	mRNA_dn	-0.561067	0.00221288	hsa-let-7c-5p_PRLR	PI3K-Akt signaling pathway
hsa-let-7c-5p	OSMR	miRNA_up	1.42807	1.19e-18	mRNA_up	0.497797	7.3686e-06	hsa-let-7c-5p_OSMR	PI3K-Akt signaling pathway
hsa-let-7c-5p	ITGA1	miRNA_up	1.42807	1.19e-18	mRNA_up	0.586731	8.76081e-07	hsa-let-7c-5p_ITGA1	PI3K-Akt signaling pathway
hsa-let-7c-5p	COL4A5	miRNA_up	1.42807	1.19e-18	mRNA_up	0.864124	4.78777e-07	hsa-let-7c-5p_COL4A5	PI3K-Akt signaling pathway
hsa-miR-1-3p	HSP90B1	miRNA_up	2.07705	3.13e-20	mRNA_dn	-0.315468	7.97251e-08	hsa-miR-1-3p_HSP90B1	PI3K-Akt signaling pathway
hsa-miR-1-3p	HSP90AA1	miRNA_up	2.07705	3.13e-20	mRNA_dn	-0.313786	1.25763e-05	hsa-miR-1-3p_HSP90AA1	PI3K-Akt signaling pathway
hsa-miR-1-3p	BRCA1	miRNA_up	2.07705	3.13e-20	mRNA_dn	-0.837841	8.35726e-25	hsa-miR-1-3p_BRCA1	PI3K-Akt signaling pathway
hsa-miR-1-3p	ITGA3	miRNA_up	2.07705	3.13e-20	mRNA_up	0.392079	0.00058022	hsa-miR-1-3p_ITGA3	PI3K-Akt signaling pathway
hsa-miR-1-3p	ITGB6	miRNA_up	2.07705	3.13e-20	mRNA_up	0.431921	0.015083	hsa-miR-1-3p_ITGB6	PI3K-Akt signaling pathway
hsa-miR-1-3p	COL4A4	miRNA_up	2.07705	3.13e-20	mRNA_up	0.711772	0.000222484	hsa-miR-1-3p_COL4A4	PI3K-Akt signaling pathway
hsa-miR-1-3p	COL6A2	miRNA_up	2.07705	3.13e-20	mRNA_up	1.04565	3.19967e-19	hsa-miR-1-3p_COL6A2	PI3K-Akt signaling pathway
hsa-miR-1-3p	HSP90AB1	miRNA_up	2.07705	3.13e-20	mRNA_dn	-0.352656	8.42404e-07	hsa-miR-1-3p_HSP90AB1	PI3K-Akt signaling pathway
hsa-miR-1-3p	MYB	miRNA_up	2.07705	3.13e-20	mRNA_dn	-1.00185	2.65838e-15	hsa-miR-1-3p_MYB	PI3K-Akt signaling pathway
hsa-miR-1-3p	IL2RG	miRNA_up	2.07705	3.13e-20	mRNA_up	0.393112	0.0078262	hsa-miR-1-3p_IL2RG	PI3K-Akt signaling pathway
hsa-miR-106a-5p	GNB5	miRNA_dn	-1.06349	4.3e-16	mRNA_up	0.272539	0.0406657	hsa-miR-106a-5p_GNB5	PI3K-Akt signaling pathway
hsa-miR-106a-5p	PHLPP1	miRNA_dn	-1.06349	4.3e-16	mRNA_dn	-0.254943	0.00402499	hsa-miR-106a-5p_PHLPP1	PI3K-Akt signaling pathway
hsa-miR-106a-5p	ITGA6	miRNA_dn	-1.06349	4.3e-16	mRNA_dn	-0.391124	3.86822e-05	hsa-miR-106a-5p_ITGA6	PI3K-Akt signaling pathway
hsa-miR-106a-5p	THBS2	miRNA_dn	-1.06349	4.3e-16	mRNA_up	0.469492	0.00566672	hsa-miR-106a-5p_THBS2	PI3K-Akt signaling pathway
hsa-miR-106a-5p	SYK	miRNA_dn	-1.06349	4.3e-16	mRNA_dn	-0.351047	0.000140256	hsa-miR-106a-5p_SYK	PI3K-Akt signaling pathway
hsa-miR-1224-5p	DDIT4	miRNA_dn	-2.95269	1.12e-19	mRNA_up	0.304578	0.0135007	hsa-miR-1224-5p_DDIT4	PI3K-Akt signaling pathway
hsa-miR-1224-5p	COL6A1	miRNA_dn	-2.95269	1.12e-19	mRNA_up	0.505676	1.29632e-05	hsa-miR-1224-5p_COL6A1	PI3K-Akt signaling pathway
hsa-miR-1251-5p	IL4R	miRNA_dn	-1.02516	0.00267597	mRNA_up	0.400287	3.9016e-10	hsa-miR-1251-5p_IL4R	PI3K-Akt signaling pathway
hsa-miR-125b-5p	MLST8	miRNA_up	1.47944	4.38e-28	mRNA_up	0.15386	0.0207512	hsa-miR-125b-5p_MLST8	PI3K-Akt signaling pathway
hsa-miR-1323	GNG11	miRNA_dn	-5.38094	1.5e-25	mRNA_up	0.842809	2.37126e-16	hsa-miR-1323_GNG11	PI3K-Akt signaling pathway
hsa-miR-143-3p	GNG7	miRNA_up	1.24136	2.34e-16	mRNA_up	1.15873	8.41195e-15	hsa-miR-143-3p_GNG7	PI3K-Akt signaling pathway
hsa-miR-143-3p	CDC37	miRNA_up	1.24136	2.34e-16	mRNA_up	0.121422	0.0371824	hsa-miR-143-3p_CDC37	PI3K-Akt signaling pathway
hsa-miR-195-5p	VWF	miRNA_up	1.0759	2.5e-21	mRNA_up	0.563965	8.73688e-07	hsa-miR-195-5p_VWF	PI3K-Akt signaling pathway
hsa-miR-195-5p	TNXB	miRNA_up	1.0759	2.5e-21	mRNA_up	1.56611	7.52356e-17	hsa-miR-195-5p_TNXB	PI3K-Akt signaling pathway
hsa-miR-195-5p	IL7	miRNA_up	1.0759	2.5e-21	mRNA_dn	-0.287397	0.00793536	hsa-miR-195-5p_IL7	PI3K-Akt signaling pathway
hsa-miR-196b-5p	LAMA4	miRNA_dn	-1.29422	3.7e-11	mRNA_up	0.57243	5.1652e-08	hsa-miR-196b-5p_LAMA4	PI3K-Akt signaling pathway
hsa-miR-296-3p	ITGA9	miRNA_dn	-1.14163	4.18e-06	mRNA_up	0.810511	5.87427e-08	hsa-miR-296-3p_ITGA9	PI3K-Akt signaling pathway
hsa-miR-296-3p	GNB2	miRNA_dn	-1.14163	4.18e-06	mRNA_up	0.282078	5.01978e-05	hsa-miR-296-3p_GNB2	PI3K-Akt signaling pathway
hsa-miR-371a-3p	THBS3	miRNA_up	2.59051	0.000126952	mRNA_up	0.340745	3.92968e-05	hsa-miR-371a-3p_THBS3	PI3K-Akt signaling pathway
hsa-miR-371a-5p	TNC	miRNA_up	2.12772	0.00107627	mRNA_up	1.25224	1.05771e-11	hsa-miR-371a-5p_TNC	PI3K-Akt signaling pathway
hsa-miR-373-3p	ITGA8	miRNA_up	2.50643	0.000123766	mRNA_up	1.5062	4.46478e-16	hsa-miR-373-3p_ITGA8	PI3K-Akt signaling pathway
hsa-miR-449a	COL2A1	miRNA_dn	-1.54737	4.91e-07	mRNA_dn	-2.14025	1.07713e-06	hsa-miR-449a_COL2A1	PI3K-Akt signaling pathway
hsa-miR-449a	LAMB2	miRNA_dn	-1.54737	4.91e-07	mRNA_up	0.382344	2.99447e-05	hsa-miR-449a_LAMB2	PI3K-Akt signaling pathway
hsa-miR-497-5p	ITGA7	miRNA_up	1.02588	1.55e-23	mRNA_up	1.39889	9.32567e-18	hsa-miR-497-5p_ITGA7	PI3K-Akt signaling pathway
hsa-miR-515-5p	LAMA2	miRNA_dn	-4.17176	4.59e-18	mRNA_up	0.79518	9.01504e-08	hsa-miR-515-5p_LAMA2	PI3K-Akt signaling pathway
hsa-let-7c-5p	TEAD1	miRNA_up	1.42807	1.19e-18	mRNA_up	0.220308	0.0297207	hsa-let-7c-5p_TEAD1	Hippo signaling pathway
hsa-let-7c-5p	YAP1	miRNA_up	1.42807	1.19e-18	mRNA_dn	-0.238365	0.00199818	hsa-let-7c-5p_YAP1	Hippo signaling pathway
hsa-let-7c-5p	LATS2	miRNA_up	1.42807	1.19e-18	mRNA_up	0.287969	8.70431e-05	hsa-let-7c-5p_LATS2	Hippo signaling pathway
hsa-let-7c-5p	NKD1	miRNA_up	1.42807	1.19e-18	mRNA_dn	-2.17445	4.79758e-16	hsa-let-7c-5p_NKD1	Hippo signaling pathway
hsa-let-7c-5p	AXIN2	miRNA_up	1.42807	1.19e-18	mRNA_dn	-1.71967	1.29476e-21	hsa-let-7c-5p_AXIN2	Hippo signaling pathway
hsa-let-7c-5p	FZD5	miRNA_up	1.42807	1.19e-18	mRNA_dn	-0.384551	1.69362e-05	hsa-let-7c-5p_FZD5	Hippo signaling pathway
hsa-let-7c-5p	GLI2	miRNA_up	1.42807	1.19e-18	mRNA_up	0.718392	3.30719e-08	hsa-let-7c-5p_GLI2	Hippo signaling pathway
hsa-let-7c-5p	LIMD1	miRNA_up	1.42807	1.19e-18	mRNA_dn	-0.248997	0.00297952	hsa-let-7c-5p_LIMD1	Hippo signaling pathway
hsa-let-7c-5p	ACTB	miRNA_up	1.42807	1.19e-18	mRNA_up	0.414564	3.30293e-12	hsa-let-7c-5p_ACTB	Hippo signaling pathway
hsa-let-7c-5p	SCRIB	miRNA_up	1.42807	1.19e-18	mRNA_dn	-0.22453	0.00737196	hsa-let-7c-5p_SCRIB	Hippo signaling pathway
hsa-let-7c-5p	AMOT	miRNA_up	1.42807	1.19e-18	mRNA_dn	-0.741375	6.86789e-09	hsa-let-7c-5p_AMOT	Hippo signaling pathway
hsa-miR-1-3p	PATJ	miRNA_up	2.07705	3.13e-20	mRNA_dn	-0.298922	1.77459e-05	hsa-miR-1-3p_PATJ	Hippo signaling pathway
hsa-miR-1-3p	AJUBA	miRNA_up	2.07705	3.13e-20	mRNA_dn	-0.312484	0.00153206	hsa-miR-1-3p_AJUBA	Hippo signaling pathway
hsa-miR-1-3p	DLG4	miRNA_up	2.07705	3.13e-20	mRNA_up	0.530926	5.80528e-06	hsa-miR-1-3p_DLG4	Hippo signaling pathway
hsa-miR-1-3p	MOB1A	miRNA_up	2.07705	3.13e-20	mRNA_dn	-0.256812	1.44321e-10	hsa-miR-1-3p_MOB1A	Hippo signaling pathway
hsa-miR-1-3p	DLG1	miRNA_up	2.07705	3.13e-20	mRNA_dn	-0.215104	0.00064285	hsa-miR-1-3p_DLG1	Hippo signaling pathway
hsa-miR-1-3p	LATS1	miRNA_up	2.07705	3.13e-20	mRNA_dn	-0.36897	6.18017e-09	hsa-miR-1-3p_LATS1	Hippo signaling pathway
hsa-miR-1-3p	SNAI2	miRNA_up	2.07705	3.13e-20	mRNA_up	0.488445	0.000105446	hsa-miR-1-3p_SNAI2	Hippo signaling pathway
hsa-miR-1-3p	DLG3	miRNA_up	2.07705	3.13e-20	mRNA_dn	-0.319869	2.36238e-05	hsa-miR-1-3p_DLG3	Hippo signaling pathway
hsa-miR-106a-5p	FRMD6	miRNA_dn	-1.06349	4.3e-16	mRNA_up	0.585067	1.46648e-05	hsa-miR-106a-5p_FRMD6	Hippo signaling pathway
hsa-miR-106a-5p	BIRC5	miRNA_dn	-1.06349	4.3e-16	mRNA_dn	-0.551576	2.00991e-09	hsa-miR-106a-5p_BIRC5	Hippo signaling pathway
hsa-miR-106a-5p	MOB1B	miRNA_dn	-1.06349	4.3e-16	mRNA_dn	-0.28418	0.00172056	hsa-miR-106a-5p_MOB1B	Hippo signaling pathway
hsa-miR-106a-5p	AFP	miRNA_dn	-1.06349	4.3e-16	mRNA_up	3.11129	1.83772e-06	hsa-miR-106a-5p_AFP	Hippo signaling pathway
hsa-miR-1224-5p	TEAD3	miRNA_dn	-2.95269	1.12e-19	mRNA_up	0.338953	1.3649e-05	hsa-miR-1224-5p_TEAD3	Hippo signaling pathway
hsa-miR-1323	WWTR1	miRNA_dn	-5.38094	1.5e-25	mRNA_up	0.826149	1.01645e-12	hsa-miR-1323_WWTR1	Hippo signaling pathway
hsa-miR-143-3p	BIRC2	miRNA_up	1.24136	2.34e-16	mRNA_dn	-0.240375	3.22794e-06	hsa-miR-143-3p_BIRC2	Hippo signaling pathway
hsa-miR-195-5p	TP53BP2	miRNA_up	1.0759	2.5e-21	mRNA_dn	-0.288456	2.10414e-07	hsa-miR-195-5p_TP53BP2	Hippo signaling pathway
hsa-miR-302a-3p	LLGL1	miRNA_up	4.14507	3.04e-09	mRNA_dn	-0.178342	0.0176133	hsa-miR-302a-3p_LLGL1	Hippo signaling pathway
hsa-miR-514a-3p	RASSF6	miRNA_dn	-1.77989	7.02e-11	mRNA_dn	-0.277507	0.047448	hsa-miR-514a-3p_RASSF6	Hippo signaling pathway
hsa-let-7c-5p	SETDB1	miRNA_up	1.42807	1.19e-18	mRNA_dn	-0.334784	3.64025e-07	hsa-let-7c-5p_SETDB1	Regulating pluripotency of stem cells
hsa-let-7c-5p	IGF1R	miRNA_up	1.42807	1.19e-18	mRNA_dn	-0.926216	7.16099e-09	hsa-let-7c-5p_IGF1R	Regulating pluripotency of stem cells
hsa-let-7c-5p	RIF1	miRNA_up	1.42807	1.19e-18	mRNA_dn	-0.505946	7.91571e-12	hsa-let-7c-5p_RIF1	Regulating pluripotency of stem cells
hsa-let-7c-5p	MAPK11	miRNA_up	1.42807	1.19e-18	mRNA_up	0.616049	6.15367e-08	hsa-let-7c-5p_MAPK11	Regulating pluripotency of stem cells
hsa-let-7c-5p	PCGF3	miRNA_up	1.42807	1.19e-18	mRNA_dn	-0.230124	0.000352063	hsa-let-7c-5p_PCGF3	Regulating pluripotency of stem cells
hsa-let-7c-5p	SMARCAD1	miRNA_up	1.42807	1.19e-18	mRNA_dn	-0.491868	8.80124e-16	hsa-let-7c-5p_SMARCAD1	Regulating pluripotency of stem cells
hsa-let-7c-5p	LIFR	miRNA_up	1.42807	1.19e-18	mRNA_up	0.437309	0.00411571	hsa-let-7c-5p_LIFR	Regulating pluripotency of stem cells
hsa-let-7c-5p	ISL1	miRNA_up	1.42807	1.19e-18	mRNA_up	0.849342	3.99201e-08	hsa-let-7c-5p_ISL1	Regulating pluripotency of stem cells
hsa-let-7c-5p	FGFR1	miRNA_up	1.42807	1.19e-18	mRNA_up	0.985371	9.20546e-12	hsa-let-7c-5p_FGFR1	Regulating pluripotency of stem cells
hsa-let-7c-5p	KAT6A	miRNA_up	1.42807	1.19e-18	mRNA_dn	-0.16733	0.00685446	hsa-let-7c-5p_KAT6A	Regulating pluripotency of stem cells
hsa-miR-1-3p	TBX3	miRNA_up	2.07705	3.13e-20	mRNA_dn	-0.315337	0.0202864	hsa-miR-1-3p_TBX3	Regulating pluripotency of stem cells
hsa-miR-1-3p	ZFHX3	miRNA_up	2.07705	3.13e-20	mRNA_up	0.25331	0.00455198	hsa-miR-1-3p_ZFHX3	Regulating pluripotency of stem cells
hsa-miR-1-3p	MEIS1	miRNA_up	2.07705	3.13e-20	mRNA_up	0.756827	5.27865e-08	hsa-miR-1-3p_MEIS1	Regulating pluripotency of stem cells
hsa-miR-1-3p	IL6ST	miRNA_up	2.07705	3.13e-20	mRNA_up	0.382819	3.84697e-05	hsa-miR-1-3p_IL6ST	Regulating pluripotency of stem cells
hsa-miR-1-3p	JARID2	miRNA_up	2.07705	3.13e-20	mRNA_dn	-0.168168	0.042401	hsa-miR-1-3p_JARID2	Regulating pluripotency of stem cells
hsa-miR-1-3p	KLF4	miRNA_up	2.07705	3.13e-20	mRNA_up	0.274884	0.0283361	hsa-miR-1-3p_KLF4	Regulating pluripotency of stem cells
hsa-miR-106a-5p	PCGF6	miRNA_dn	-1.06349	4.3e-16	mRNA_dn	-0.313972	0.000765836	hsa-miR-106a-5p_PCGF6	Regulating pluripotency of stem cells
hsa-miR-106a-5p	PCGF5	miRNA_dn	-1.06349	4.3e-16	mRNA_dn	-0.128511	0.0422884	hsa-miR-106a-5p_PCGF5	Regulating pluripotency of stem cells
hsa-miR-106a-5p	PCGF2	miRNA_dn	-1.06349	4.3e-16	mRNA_up	0.214317	0.0260909	hsa-miR-106a-5p_PCGF2	Regulating pluripotency of stem cells
hsa-miR-106a-5p	TCF3	miRNA_dn	-1.06349	4.3e-16	mRNA_dn	-0.260577	0.000260222	hsa-miR-106a-5p_TCF3	Regulating pluripotency of stem cells
hsa-miR-106a-5p	REST	miRNA_dn	-1.06349	4.3e-16	mRNA_dn	-0.228166	0.000129334	hsa-miR-106a-5p_REST	Regulating pluripotency of stem cells
hsa-miR-520a-5p	JAK3	miRNA_dn	-6.42132	3.62e-32	mRNA_up	0.279759	0.0302694	hsa-miR-520a-5p_JAK3	Regulating pluripotency of stem cells
