# Supplementary material for: Cross-talk of RNA modification "writers" describes tumor stemness and microenvironment and guides personalized immunotherapy for gastric cancer
Source: Aging (Albany NY). 2023 Jun 14;15(12):5445–81. doi: 10.18632/aging.204802 (PMC10333070; doi:10.18632/aging.204802)
Supplement: Supplementary Table 17 [file aging-15-204802-s018.xlsx]

## Sheet: Sheet1
Supplementary Table 17. The differences of PDUI of the genes between WM_Score high and low groups in TCGA-STAD cohort.
PDUI_Diff gene	logFC	logCPM	P-Value	Class
LACAT8	-1.90136	8.27599	6.12326e-18	APA_PDUI shortening
CYB561D2	1.89079	8.20525	6.04199e-12	APA_PDUI lenthening
PLAC4	1.24682	8.36432	1.49636e-08	APA_PDUI lenthening
H3F3C	-1.26405	8.0618	3.72488e-06	APA_PDUI shortening
FAM149A	-1.02885	8.21112	7.95924e-06	APA_PDUI shortening
MYO7A	1.29256	8.11431	1.0019e-05	APA_PDUI lenthening
LINC00431	1.16065	8.14165	2.59704e-05	APA_PDUI lenthening
ASCL1	-0.933605	8.21765	8.19816e-05	APA_PDUI shortening
LOC283335	-0.94625	8.19723	8.96541e-05	APA_PDUI shortening
LMX1B	-0.797928	8.28329	0.000242957	APA_PDUI shortening
COL11A2	0.747208	8.36885	0.000366454	APA_PDUI lenthening
ATP5EP2	-0.785061	8.27889	0.000393564	APA_PDUI shortening
DNAJC9-AS1	0.681185	8.46336	0.000444584	APA_PDUI lenthening
NET1	0.796624	8.31373	0.000484033	APA_PDUI lenthening
PDE6B	0.693749	8.43562	0.000495751	APA_PDUI lenthening
SEMA4D	-0.843683	8.17403	0.000602604	APA_PDUI shortening
AP3B2	0.713249	8.38602	0.000614489	APA_PDUI lenthening
LINC00967	-0.652658	8.4079	0.000643703	APA_PDUI shortening
CD40LG	0.740735	8.35593	0.000662476	APA_PDUI lenthening
MBLAC2	-0.675133	8.33813	0.000922687	APA_PDUI shortening
GRIN1	0.663589	8.41401	0.00102098	APA_PDUI lenthening
NDE1	-0.739532	8.24962	0.00108571	APA_PDUI shortening
RAET1E-AS1	0.859506	8.20049	0.00109111	APA_PDUI lenthening
SVIL-AS1	-0.867578	8.08481	0.00116803	APA_PDUI shortening
NDRG4	0.662625	8.41661	0.00125168	APA_PDUI lenthening
USP35	0.718699	8.29837	0.00187755	APA_PDUI lenthening
OLFM1	0.611268	8.40284	0.00256291	APA_PDUI lenthening
NRG4	0.573095	8.48932	0.0027254	APA_PDUI lenthening
RBM26-AS1	-0.834458	8.05293	0.00300688	APA_PDUI shortening
DPP6	0.609209	8.39237	0.00303561	APA_PDUI lenthening
CERS1	-0.758326	8.11237	0.00315848	APA_PDUI shortening
C15orf59	-0.821164	8.02328	0.00322243	APA_PDUI shortening
GDPD2	0.563097	8.4549	0.00377035	APA_PDUI lenthening
FER	-0.552586	8.40373	0.00438376	APA_PDUI shortening
HIST1H4I	-0.622841	8.30539	0.00448582	APA_PDUI shortening
ALG10	-0.607364	8.30611	0.00448582	APA_PDUI shortening
PCLO	-0.563551	8.38218	0.00451759	APA_PDUI shortening
PGA5	0.703132	8.20449	0.00543189	APA_PDUI lenthening
CANX	0.614649	8.3148	0.0055201	APA_PDUI lenthening
WHSC1	-0.769009	8.05473	0.00559181	APA_PDUI shortening
CPE	0.628248	8.31932	0.00560755	APA_PDUI lenthening
KLK4	0.604313	8.34312	0.00588456	APA_PDUI lenthening
LINC00641	-0.528423	8.43016	0.00596267	APA_PDUI shortening
A1CF	-0.596419	8.28288	0.0060943	APA_PDUI shortening
SAMD3	0.543046	8.41772	0.00615825	APA_PDUI lenthening
CT55	-0.578069	8.31232	0.00682744	APA_PDUI shortening
RTN1	0.647291	8.27665	0.00756325	APA_PDUI lenthening
ANKRD6	-0.612903	8.20819	0.0083702	APA_PDUI shortening
BMX	0.488568	8.49822	0.00908842	APA_PDUI lenthening
MACROD2	-0.517683	8.40057	0.00912319	APA_PDUI shortening
BCL2L2-PABPN1	-0.617275	8.23175	0.00922406	APA_PDUI shortening
AADAT	-0.53504	8.36514	0.00938251	APA_PDUI shortening
RFXAP	0.75221	8.12039	0.00977332	APA_PDUI lenthening
TP63	-0.498499	8.42597	0.00987013	APA_PDUI shortening
HLA-DQA2	-0.596445	8.24495	0.00998557	APA_PDUI shortening
CCDC112	0.543284	8.34541	0.0100504	APA_PDUI lenthening
METTL25	-0.697998	8.12078	0.0107354	APA_PDUI shortening
SAPCD1-AS1	0.582325	8.28777	0.011396	APA_PDUI lenthening
FAM13A	0.556539	8.3244	0.0118214	APA_PDUI lenthening
NUGGC	0.539816	8.34837	0.011936	APA_PDUI lenthening
VCX3B	-0.531567	8.30518	0.0129387	APA_PDUI shortening
HOMER1	-0.456334	8.42689	0.0150704	APA_PDUI shortening
BEND3	-0.470379	8.41188	0.0150896	APA_PDUI shortening
CACNB1	-0.705929	8.02788	0.0154637	APA_PDUI shortening
CPT1A	0.571302	8.25195	0.015612	APA_PDUI lenthening
SGCE	0.48921	8.41351	0.0157716	APA_PDUI lenthening
SMG1P1	0.510345	8.38438	0.0162069	APA_PDUI lenthening
NFIB	-0.556082	8.25442	0.0163978	APA_PDUI shortening
HLA-G	0.519603	8.34305	0.0166286	APA_PDUI lenthening
LRRIQ4	-0.442785	8.46409	0.0166527	APA_PDUI shortening
RNF182	0.452429	8.46017	0.0169216	APA_PDUI lenthening
STOX1	0.475264	8.42847	0.017821	APA_PDUI lenthening
RAB3C	-0.602756	8.14278	0.0181113	APA_PDUI shortening
PCSK5	-0.493373	8.302	0.0181987	APA_PDUI shortening
RALGPS1	0.454579	8.48891	0.0183113	APA_PDUI lenthening
RASSF9	-0.451444	8.43892	0.0188966	APA_PDUI shortening
HIPK2	-0.425539	8.42965	0.0190395	APA_PDUI shortening
SMKR1	-0.495021	8.3479	0.0190408	APA_PDUI shortening
LOC100505549	0.555337	8.28016	0.0196211	APA_PDUI lenthening
ITPR1	0.526812	8.3284	0.0196856	APA_PDUI lenthening
PCDH20	-0.452302	8.40601	0.0203246	APA_PDUI shortening
MMS22L	-0.604781	8.16237	0.0204914	APA_PDUI shortening
CACNA2D2	0.463855	8.42467	0.0205961	APA_PDUI lenthening
GRIN2C	0.678161	8.08459	0.0212143	APA_PDUI lenthening
LVCAT8	0.433577	8.47996	0.0212358	APA_PDUI lenthening
KCP	-0.445112	8.42954	0.0212618	APA_PDUI shortening
NAT8L	-0.561474	8.20562	0.0213229	APA_PDUI shortening
SPEF2	-0.622346	8.08627	0.0218517	APA_PDUI shortening
WDR20	-0.442455	8.44124	0.022312	APA_PDUI shortening
ZNF37BP	-0.485941	8.31592	0.0227204	APA_PDUI shortening
B4GALT6	-0.444552	8.41286	0.0227563	APA_PDUI shortening
TINAG	0.447905	8.4358	0.023204	APA_PDUI lenthening
SEL1L	0.505059	8.32593	0.0232551	APA_PDUI lenthening
C12orf56	0.461468	8.41762	0.0240275	APA_PDUI lenthening
IFT52	0.443346	8.41649	0.0242963	APA_PDUI lenthening
COLCA1	-0.565651	8.14736	0.0246438	APA_PDUI shortening
A2ML1	0.46706	8.39858	0.0248223	APA_PDUI lenthening
RECQL5	0.638784	8.0757	0.0250459	APA_PDUI lenthening
CNTD1	-0.533359	8.23652	0.0251015	APA_PDUI shortening
REST	-0.420265	8.40921	0.025632	APA_PDUI shortening
CST2	0.474922	8.3742	0.0258101	APA_PDUI lenthening
LINC00242	-0.533245	8.19032	0.0258314	APA_PDUI shortening
C11orf57	-0.485239	8.30592	0.027411	APA_PDUI shortening
VIP	0.491542	8.30936	0.0274707	APA_PDUI lenthening
VHL	0.524403	8.25582	0.0276691	APA_PDUI lenthening
UGT2B17	0.441877	8.39637	0.0286791	APA_PDUI lenthening
RBPJ	-0.45814	8.30325	0.0291864	APA_PDUI shortening
PPP1R9A	-0.447095	8.34635	0.0294393	APA_PDUI shortening
PNMA5	0.424841	8.41949	0.0314096	APA_PDUI lenthening
ARF6	-0.500079	8.24135	0.031456	APA_PDUI shortening
SYCE1	0.482988	8.31993	0.0318453	APA_PDUI lenthening
WISP3	0.40309	8.46829	0.0320231	APA_PDUI lenthening
SLC5A12	0.49103	8.31284	0.0320643	APA_PDUI lenthening
VEPH1	0.606309	8.13482	0.0320667	APA_PDUI lenthening
TSHZ2	-0.477065	8.25842	0.0322107	APA_PDUI shortening
HIST1H4E	0.420016	8.46124	0.0325103	APA_PDUI lenthening
ATP1A3	0.487667	8.28529	0.032748	APA_PDUI lenthening
ZNF440	0.476392	8.25306	0.0330067	APA_PDUI lenthening
EIF1B	0.43683	8.39729	0.0330633	APA_PDUI lenthening
MND1	0.429317	8.39001	0.0334711	APA_PDUI lenthening
ITIH4	0.632043	8.01931	0.0343506	APA_PDUI lenthening
CP	0.659625	8.05648	0.0344273	APA_PDUI lenthening
SORL1	-0.408721	8.38995	0.0345278	APA_PDUI shortening
HELZ	-0.42743	8.35279	0.0351823	APA_PDUI shortening
CXXC4	-0.464705	8.28366	0.0352551	APA_PDUI shortening
VRTN	-0.453639	8.31618	0.035472	APA_PDUI shortening
ZNF256	-0.419497	8.40736	0.0356428	APA_PDUI shortening
CELF1	0.37421	8.47768	0.0358519	APA_PDUI lenthening
CDK5	0.420244	8.4153	0.036512	APA_PDUI lenthening
DPM1	0.411601	8.41029	0.0370196	APA_PDUI lenthening
TMEM19	0.472676	8.3155	0.0375037	APA_PDUI lenthening
ASUN	0.399951	8.45825	0.0375854	APA_PDUI lenthening
RNF157-AS1	-0.442267	8.32699	0.0376212	APA_PDUI shortening
LOC100422737	-0.409974	8.4004	0.0377929	APA_PDUI shortening
GPR87	-0.398096	8.44395	0.0378931	APA_PDUI shortening
CLMN	-0.474022	8.24598	0.0390586	APA_PDUI shortening
ISL1	0.492087	8.26165	0.0390754	APA_PDUI lenthening
CLPS	0.526928	8.2232	0.0391878	APA_PDUI lenthening
LOC100288637	-0.515209	8.20068	0.0394965	APA_PDUI shortening
CANT1	0.437306	8.37399	0.0395444	APA_PDUI lenthening
MRPL1	0.397533	8.43313	0.039969	APA_PDUI lenthening
PRPSAP1	0.431707	8.36917	0.0400416	APA_PDUI lenthening
C21orf58	-0.389723	8.43955	0.0401162	APA_PDUI shortening
MOGAT3	-0.454234	8.29131	0.0401682	APA_PDUI shortening
WSCD1	-0.512651	8.17904	0.0403858	APA_PDUI shortening
INSL4	0.451893	8.35804	0.0405341	APA_PDUI lenthening
MYLIP	-0.399138	8.38747	0.0407151	APA_PDUI shortening
HS6ST2	-0.40419	8.40813	0.0417354	APA_PDUI shortening
WT1	-0.411747	8.35035	0.0418076	APA_PDUI shortening
RIOK1	0.435883	8.34025	0.0419726	APA_PDUI lenthening
TRMT5	-0.504319	8.1961	0.0421703	APA_PDUI shortening
C2CD4A	-0.415252	8.33671	0.0422294	APA_PDUI shortening
PSORS1C1	0.403934	8.45303	0.042723	APA_PDUI lenthening
HK3	0.399332	8.45139	0.042723	APA_PDUI lenthening
NIPBL-AS1	-0.445954	8.30339	0.0427342	APA_PDUI shortening
PRKCSH	0.4446	8.31943	0.043325	APA_PDUI lenthening
CCL17	-0.476731	8.21304	0.0435021	APA_PDUI shortening
KANSL2	0.475129	8.29913	0.044547	APA_PDUI lenthening
RTN4IP1	-0.606508	8.05069	0.0447267	APA_PDUI shortening
ANKRD20A5P	-0.589923	8.05181	0.0447267	APA_PDUI shortening
ORC5	0.580729	8.10306	0.0447557	APA_PDUI lenthening
NUP43	0.364549	8.47878	0.0452846	APA_PDUI lenthening
BBOF1	0.494056	8.26597	0.045871	APA_PDUI lenthening
LOC441178	-0.501272	8.20919	0.0464423	APA_PDUI shortening
BRSK1	0.503861	8.24413	0.0465323	APA_PDUI lenthening
FAM63B	-0.399319	8.36305	0.046539	APA_PDUI shortening
DCLK1	0.576418	8.11032	0.0467995	APA_PDUI lenthening
NPY6R	-0.437173	8.3256	0.0477075	APA_PDUI shortening
LMBRD1	0.422826	8.34654	0.0479758	APA_PDUI lenthening
PRRG4	-0.375489	8.41768	0.0486463	APA_PDUI shortening
LDHC	0.380487	8.4433	0.0492895	APA_PDUI lenthening
PLEKHA8P1	-0.373949	8.46288	0.0495281	APA_PDUI shortening
