# Supplementary material for: Cross-talk of RNA modification "writers" describes tumor stemness and microenvironment and guides personalized immunotherapy for gastric cancer
Source: Aging (Albany NY). 2023 Jun 14;15(12):5445–81. doi: 10.18632/aging.204802 (PMC10333070; doi:10.18632/aging.204802)
Supplement: Supplementary Table 18 [file aging-15-204802-s019.xlsx]

## Sheet: Sheet1
Supplementary Table 18. The differences of A-I editing frequency of the genes between WM_Score high and low groups in TCGA-STAD cohort.
A_I_Diff gene	logFC	logCPM	P-Value	Class
PPID	-0.904261	10.3457	0.000264123	A_I editing low
CD164	-0.933981	10.2215	0.000340263	A_I editing low
DENND6A	-0.919841	10.2808	0.000610204	A_I editing low
C12orf79	-0.771629	10.3665	0.00222161	A_I editing low
C5orf15	-0.890165	10.2405	0.00227805	A_I editing low
NAP1L4	-0.857709	10.2379	0.00227805	A_I editing low
NUGGC	-0.798785	10.266	0.00327386	A_I editing low
ECH1	0.812705	10.2834	0.00628745	A_I editing high
SYBU	-0.649202	10.4155	0.00788418	A_I editing low
ZFC3H1	-0.733979	10.2341	0.00830738	A_I editing low
PPP4R1	-0.695109	10.2973	0.00879774	A_I editing low
TNRC18	-0.729471	10.2607	0.00979197	A_I editing low
SAMHD1	0.696632	10.2332	0.0108935	A_I editing high
HNRNPC	-0.667171	10.3173	0.0117899	A_I editing low
TMEM131	-0.679959	10.2803	0.0150019	A_I editing low
STK40	-0.669465	10.2316	0.0154637	A_I editing low
WDR26	-0.673858	10.2677	0.015902	A_I editing low
XPO1	-0.686411	10.2385	0.0161522	A_I editing low
ZBTB8OS	-0.6842	10.2367	0.0161522	A_I editing low
USP34	-0.699422	10.2399	0.0165519	A_I editing low
MBOAT7	-0.69568	10.2434	0.0165519	A_I editing low
RMDN1	-0.512063	10.1885	0.016628	A_I editing low
ZNF721	-0.677916	10.2468	0.0167191	A_I editing low
FBXL19-AS1	0.559881	10.3979	0.0169029	A_I editing high
JMJD1C	-0.62866	10.3156	0.0170884	A_I editing low
CD164	-0.644444	10.2035	0.0184121	A_I editing low
C12orf79	-0.605767	10.3341	0.0203518	A_I editing low
BVES	0.615259	10.2153	0.0221736	A_I editing high
SIK3	-0.587045	10.2778	0.0238508	A_I editing low
RAD51-AS1	0.618694	10.2601	0.0252457	A_I editing high
FBXO11	0.533655	10.2014	0.0256642	A_I editing high
PTK2	-0.618096	10.2573	0.0274541	A_I editing low
ELF2	-0.604792	10.251	0.0281193	A_I editing low
N4BP2L2	-0.571064	10.2493	0.0281193	A_I editing low
ATE1	-0.61485	10.2273	0.0282257	A_I editing low
PDE4D	-0.579189	10.2454	0.0286044	A_I editing low
LOC654342	-0.621059	10.2334	0.0287541	A_I editing low
ZNF83	0.558955	10.3689	0.0293	A_I editing high
CD164	-0.566399	10.197	0.0299716	A_I editing low
DHX32	-0.570019	10.3183	0.0334853	A_I editing low
RBM47	-0.573851	10.2859	0.0336695	A_I editing low
TNPO3	-0.572891	10.3145	0.0355916	A_I editing low
SEC11A	-0.559806	10.3157	0.0355916	A_I editing low
TAOK3	-0.534262	10.2754	0.0373047	A_I editing low
PIGU	-0.536655	10.3611	0.0380703	A_I editing low
VPS37B	-0.524963	10.201	0.039042	A_I editing low
KLHDC4	-0.576502	10.2492	0.0464322	A_I editing low
STAU1	-0.572525	10.2485	0.0464322	A_I editing low
C12orf79	-0.573306	10.2422	0.0479653	A_I editing low
PPP3R1	-0.53595	10.2427	0.0479653	A_I editing low
ANKRD11	-0.557039	10.2889	0.0481134	A_I editing low
ATAD2B	-0.536937	10.2882	0.0481134	A_I editing low
RFWD2	-0.551917	10.2131	0.0481726	A_I editing low
KMT2C	-0.513593	10.2152	0.0481726	A_I editing low
SRPK2	-0.5652	10.2394	0.049232	A_I editing low
SEC13	0.576386	10.2215	0.0498191	A_I editing high
WAPAL	-0.554343	10.2174	0.0498745	A_I editing low
IP6K2	-0.538464	10.2194	0.0498745	A_I editing low
MKL1	-0.524078	10.2228	0.0498745	A_I editing low
