# Supplementary material for: Cross-talk of RNA modification "writers" describes tumor stemness and microenvironment and guides personalized immunotherapy for gastric cancer
Source: Aging (Albany NY). 2023 Jun 14;15(12):5445–81. doi: 10.18632/aging.204802 (PMC10333070; doi:10.18632/aging.204802)
Supplement: Supplementary Table 19 [file aging-15-204802-s020.xlsx]

## Sheet: Sheet1
Supplementary Table 19. Estimation of the relative abundance of TME infiltrating cells for patients in IMvigor210 cohort by ssGSEA.
Patient ID	Activated.B.cell	Activated.CD4.T.cell	Activated.CD8.T.cell	Activated.dendritic.cell	CD56bright.natural.killer.cell	CD56dim.natural.killer.cell	Eosinophil	Gamma.delta.T.cell	Immature..B.cell	Immature.dendritic.cell	MDSC	Macrophages M1	Macrophages M2	Mast.cell	Monocyte	Natural.killer.T.cell	Natural.killer.cell	Neutrophil	Plasmacytoid.dendritic.cell	Regulatory.T.cell	T.follicular.helper.cell	Type.1.T.helper.cell	Type.17.T.helper.cell	Type.2.T.helper.cell
SAMc1b27bc16435	0.410729	0.846409	0.783459	0.599689	0.751637	0.62078	0.434597	0.703126	0.487364	0.804562	0.754192	0.404643	0.360474	0.633806	0.830626	0.495731	0.682833	0.375031	0.747151	0.685715	0.583636	0.636641	0.450374	0.659681
SAMf275eb859a39	0.358931	0.774203	0.728056	0.70467	0.746324	0.624275	0.478512	0.7367	0.522023	0.883403	0.805072	0.704494	0.574802	0.622387	0.806464	0.52427	0.738548	0.582412	0.785473	0.729762	0.594676	0.628063	0.532171	0.672848
SAM7f0d9cc7f001	0.617937	0.798943	0.766879	0.627818	0.714943	0.617147	0.548686	0.719634	0.629728	0.868247	0.843903	0.358264	0.55637	0.810511	0.840404	0.571521	0.76782	0.529149	0.787155	0.770924	0.628021	0.685443	0.504882	0.691981
SAM4305ab968b90	0.0829374	0.702606	0.601297	0.498758	0.7378	0.618749	0.347616	0.677038	0.403393	0.792544	0.570672	0.111033	0.340003	0.458628	0.805907	0.399212	0.652565	0.154891	0.674933	0.539326	0.538654	0.54828	0.37449	0.620121
SAMcf018fee2acd	0.454508	0.770435	0.722163	0.66812	0.73945	0.598148	0.513177	0.708859	0.547076	0.863047	0.795914	0.401141	0.524448	0.670067	0.821542	0.536267	0.708678	0.435352	0.777145	0.76234	0.611204	0.63653	0.49728	0.673826
SAMb2f1d0e54ece	0.382151	0.795004	0.762368	0.673624	0.742136	0.595198	0.481835	0.767918	0.542994	0.864168	0.907829	0.485548	0.614	0.783695	0.799605	0.602462	0.790468	0.523012	0.791198	0.856515	0.674797	0.690916	0.467426	0.649519
SAMcc4675f394a1	0.34821	0.711149	0.680257	0.644816	0.705864	0.620459	0.39427	0.741199	0.44092	0.829662	0.811374	0.33805	0.758098	0.666717	0.862529	0.546304	0.737578	0.522669	0.750186	0.738508	0.608618	0.664373	0.496081	0.633572
SAM49f9b2e57aa5	0.53565	0.794074	0.670407	0.591499	0.754689	0.613671	0.374126	0.70534	0.549748	0.833508	0.719338	0.330328	0.491991	0.621002	0.833824	0.472556	0.694166	0.344844	0.736266	0.667751	0.575931	0.617239	0.484868	0.642949
SAM2e7aa8fa0ab3	0.389352	0.766114	0.757943	0.650279	0.735268	0.624404	0.405164	0.686033	0.503135	0.844521	0.797817	0.367047	0.47897	0.568387	0.811137	0.506225	0.718929	0.246029	0.763571	0.688383	0.600316	0.632426	0.460661	0.60874
SAMdf3e42c8672a	0.513503	0.852826	0.810409	0.666201	0.747439	0.620451	0.415487	0.719693	0.564978	0.830167	0.833117	0.319307	0.556865	0.57324	0.765267	0.583736	0.734201	0.472012	0.779311	0.765588	0.625697	0.626023	0.436768	0.686128
SAMd027124354ce	0.241833	0.765502	0.644045	0.602305	0.727846	0.571683	0.391339	0.700527	0.459061	0.761343	0.751901	0.3746	0.560182	0.560823	0.748164	0.545292	0.686601	0.346616	0.791435	0.707141	0.576766	0.585896	0.461181	0.69758
SAM36d87392593b	0.56506	0.83984	0.729928	0.644859	0.753303	0.605375	0.448429	0.687852	0.620408	0.82768	0.807068	0.549162	0.504289	0.592687	0.762641	0.542782	0.719227	0.449383	0.780769	0.740776	0.584572	0.626198	0.449406	0.619757
SAM36a9225b0222	0.57696	0.857285	0.82911	0.636846	0.744813	0.595617	0.50156	0.721449	0.661076	0.853521	0.920287	0.43776	0.539267	0.780934	0.792681	0.611829	0.788802	0.406881	0.786925	0.87788	0.692133	0.707401	0.489604	0.713756
SAMe7bf6c015192	0.549121	0.830712	0.829083	0.666091	0.748148	0.62334	0.473718	0.706254	0.589333	0.888636	0.910156	0.453728	0.565549	0.721085	0.788828	0.590854	0.76766	0.448957	0.781717	0.82907	0.634421	0.668222	0.532608	0.695609
SAM6dd7ad1d797d	0.461078	0.83203	0.747619	0.708993	0.743074	0.614322	0.478135	0.789026	0.654536	0.867495	0.916029	0.485362	0.686577	0.669402	0.802131	0.600105	0.758553	0.562429	0.78554	0.896727	0.650913	0.671733	0.506837	0.675227
SAMc0d625a50eb8	0.467349	0.652974	0.637684	0.629089	0.731384	0.579822	0.49639	0.716164	0.579629	0.873123	0.822478	0.368393	0.547664	0.762824	0.806173	0.557699	0.770634	0.362512	0.769894	0.806104	0.659433	0.659783	0.472021	0.647539
SAM18039827e1b9	0.300309	0.747171	0.655896	0.605586	0.741921	0.616089	0.428982	0.676207	0.461084	0.850654	0.737606	0.347834	0.559856	0.648566	0.820724	0.5217	0.693378	0.488915	0.780948	0.671262	0.554822	0.591915	0.489028	0.624726
SAM681e4bf7cf85	0.429226	0.804018	0.709834	0.594994	0.750816	0.624372	0.42413	0.702476	0.560268	0.825675	0.735513	0.330031	0.560091	0.63057	0.814217	0.487154	0.717666	0.374185	0.737891	0.692248	0.599885	0.634684	0.471472	0.675361
SAMc692536a795a	0.555002	0.796598	0.771028	0.622092	0.723154	0.596093	0.504757	0.666201	0.613169	0.833797	0.80081	0.48952	0.435991	0.699628	0.827301	0.56081	0.740101	0.352544	0.762952	0.739412	0.629756	0.665405	0.465263	0.67251
SAM9a2cf3c06fb3	0.431891	0.8378	0.738402	0.635623	0.737711	0.601931	0.588376	0.759859	0.570802	0.836229	0.829024	0.436919	0.592145	0.797903	0.840335	0.578796	0.745555	0.514492	0.764477	0.764603	0.616413	0.676555	0.539647	0.750702
SAM557dde1b9f3e	0.486247	0.816093	0.742094	0.614927	0.729358	0.619846	0.509503	0.695838	0.517231	0.853993	0.793879	0.366805	0.427126	0.703226	0.824808	0.532104	0.727418	0.374705	0.742255	0.723201	0.595251	0.655025	0.483641	0.670648
SAM23aa15d4a0b0	0.514581	0.80799	0.690848	0.625683	0.750615	0.60997	0.410562	0.698056	0.569246	0.823841	0.801651	0.389783	0.499278	0.653215	0.836853	0.480146	0.739343	0.365934	0.759713	0.717764	0.585639	0.644535	0.466042	0.648638
SAM468a9e1dc821	0.221797	0.718937	0.644335	0.647552	0.712972	0.621161	0.431663	0.695865	0.4395	0.873051	0.798113	0.430048	0.514894	0.603312	0.775125	0.478028	0.732213	0.658964	0.78088	0.702647	0.600969	0.606268	0.519775	0.651395
SAM81b71522417a	0.237491	0.717468	0.587674	0.542986	0.746141	0.617636	0.366574	0.677617	0.379374	0.781049	0.630354	0.417094	0.569273	0.462371	0.776714	0.48862	0.685441	0.295824	0.693126	0.559712	0.496671	0.554365	0.404552	0.640481
SAM6cb230f208a8	0.259746	0.718117	0.670558	0.590901	0.717194	0.598697	0.442432	0.679008	0.479516	0.820193	0.729017	0.269553	0.470105	0.661399	0.801707	0.482765	0.718792	0.475869	0.760727	0.661452	0.570598	0.615578	0.508675	0.576633
SAM0684af734db1	0.162335	0.770389	0.639553	0.618561	0.729635	0.677692	0.460363	0.718152	0.460609	0.802338	0.702206	0.427328	0.560607	0.510988	0.820845	0.506362	0.660823	0.394615	0.728876	0.681917	0.54198	0.579559	0.525791	0.648371
SAMb963dda93cfd	0.333343	0.824357	0.69829	0.634999	0.72028	0.585222	0.409345	0.758998	0.50048	0.840493	0.85716	0.439447	0.525916	0.668845	0.78137	0.555527	0.736326	0.448598	0.768646	0.808852	0.613198	0.649732	0.463949	0.678219
SAMa9ca8536d2b1	0.654919	0.876896	0.787638	0.659123	0.733947	0.583885	0.594251	0.766624	0.65153	0.865581	0.884511	0.406426	0.679689	0.810922	0.812114	0.585661	0.767072	0.505893	0.794242	0.798164	0.64296	0.714782	0.479658	0.707096
SAM9fb814c22bdb	0.628583	0.892707	0.79437	0.696464	0.752004	0.592249	0.568463	0.718803	0.672799	0.878884	0.923943	0.46415	0.655289	0.784319	0.800119	0.624824	0.798049	0.550497	0.806808	0.853976	0.672505	0.722614	0.543137	0.709006
SAMbcbc7957c264	0.300689	0.752399	0.654623	0.622559	0.742493	0.629199	0.429288	0.695308	0.469261	0.82373	0.711973	0.491742	0.538935	0.572243	0.801161	0.484403	0.7039	0.360281	0.734684	0.62182	0.586531	0.585241	0.482154	0.649654
SAM7fb6987514a4	0.632312	0.957944	0.87878	0.686957	0.737966	0.617227	0.582056	0.724281	0.666936	0.840887	0.909896	0.426233	0.600442	0.739642	0.787936	0.627119	0.804266	0.519252	0.794086	0.802831	0.668296	0.713244	0.524978	0.72363
SAM63405b04ab2d	0.478667	0.817572	0.769452	0.676571	0.724386	0.628102	0.43606	0.697685	0.589468	0.841173	0.842464	0.361831	0.573953	0.656111	0.823131	0.55503	0.754979	0.434504	0.792953	0.803986	0.640566	0.664692	0.456829	0.633878
SAM18bc1078bc15	0.389435	0.815631	0.772973	0.65039	0.71056	0.577731	0.393366	0.707672	0.511959	0.814907	0.822896	0.366542	0.519767	0.628259	0.798355	0.492973	0.717617	0.389781	0.766265	0.703697	0.605092	0.665338	0.477269	0.64068
SAM7d2dfba6cd84	0.625994	0.819776	0.780723	0.677152	0.722722	0.642257	0.545749	0.677613	0.66491	0.874097	0.945646	0.377085	0.630202	0.756187	0.804422	0.577003	0.77704	0.588592	0.814917	0.837621	0.63684	0.721586	0.556058	0.655446
SAMd1bd63734394	0.275392	0.790264	0.712122	0.662838	0.739423	0.64707	0.368824	0.7192	0.470264	0.827109	0.768761	0.468751	0.547715	0.517288	0.768109	0.522587	0.696781	0.465393	0.719348	0.674251	0.562048	0.588936	0.455257	0.645309
SAMe9ae8beb82fa	0.526899	0.800609	0.721011	0.691157	0.738501	0.598241	0.444197	0.690328	0.562338	0.874668	0.84042	0.437041	0.600491	0.670234	0.818497	0.568623	0.75682	0.535504	0.802707	0.787941	0.639154	0.661563	0.510486	0.677235
SAMb0a83e5fbde9	0.382773	0.716307	0.665516	0.611025	0.726262	0.637091	0.452534	0.693208	0.448548	0.832568	0.696446	0.311582	0.379069	0.636156	0.804996	0.507732	0.69346	0.294227	0.733565	0.676439	0.580348	0.604294	0.474285	0.62626
SAMba7176afe070	0.26878	0.615597	0.574658	0.540729	0.72638	0.606621	0.379155	0.662155	0.417786	0.809568	0.619009	0.424388	0.362537	0.468512	0.762527	0.412404	0.696919	0.204469	0.70367	0.576737	0.551416	0.5563	0.401522	0.619932
SAMae1690469964	0.355927	0.749562	0.70758	0.619257	0.751664	0.624538	0.385633	0.681427	0.446272	0.80799	0.70538	0.59763	0.388088	0.545118	0.78058	0.459858	0.706746	0.376849	0.740619	0.646874	0.565229	0.608331	0.483288	0.692746
SAMbe83eae4026e	0.562159	0.876158	0.742727	0.631858	0.74963	0.642548	0.460653	0.705073	0.577503	0.820575	0.815289	0.584544	0.512037	0.656484	0.820501	0.49586	0.73942	0.383032	0.750633	0.719948	0.589047	0.665754	0.487381	0.669053
SAMe5bc41772bc9	0.361886	0.761203	0.652435	0.686075	0.709713	0.620957	0.414386	0.746097	0.442373	0.859587	0.817258	0.425783	0.701891	0.629133	0.822945	0.56684	0.749559	0.519969	0.787024	0.740199	0.634776	0.655739	0.537441	0.662435
SAM23095936e611	0.307055	0.774051	0.652034	0.583591	0.759954	0.626638	0.440261	0.699175	0.457831	0.816299	0.706808	0.385472	0.54085	0.51191	0.81808	0.496582	0.708931	0.365923	0.739623	0.678539	0.555278	0.586543	0.47789	0.66834
SAM7114d99032ec	0.339322	0.712418	0.604599	0.58852	0.718461	0.614143	0.432959	0.664595	0.403779	0.822484	0.719733	0.294417	0.384682	0.626477	0.811653	0.468663	0.705573	0.317279	0.739937	0.621401	0.599435	0.593857	0.468445	0.639049
SAMd215b503f99a	0.371664	0.699872	0.638775	0.600121	0.720175	0.598577	0.403455	0.675489	0.526481	0.82872	0.795497	0.409848	0.583852	0.695033	0.790677	0.533044	0.755959	0.368464	0.760476	0.756009	0.616376	0.654292	0.51244	0.665802
SAMdb3f50c9129c	0.450137	0.797003	0.680073	0.575711	0.733373	0.581535	0.560034	0.652437	0.53448	0.81354	0.702809	0.284904	0.509879	0.709422	0.791273	0.462791	0.713739	0.41259	0.739097	0.645946	0.574809	0.606364	0.449814	0.685797
SAMbf1a3ae828e6	0.486951	0.815485	0.73846	0.631359	0.71602	0.597157	0.477173	0.708704	0.574969	0.858713	0.822934	0.333679	0.523345	0.754541	0.819109	0.548424	0.737813	0.362201	0.788886	0.752501	0.643715	0.669095	0.469941	0.702668
SAM52e3fa3ad574	0.897624	0.915926	0.889344	0.72081	0.701762	0.619451	0.54682	0.709866	0.901467	0.82314	0.927912	0.474155	0.580565	0.695448	0.885512	0.59326	0.747316	0.410131	0.783386	0.79686	0.721154	0.695114	0.478652	0.617864
SAMd4c0837b0997	0.499862	0.852247	0.718056	0.610323	0.740141	0.60495	0.498474	0.701389	0.568326	0.823207	0.738526	0.476039	0.414654	0.659417	0.781626	0.523515	0.722489	0.365562	0.752471	0.702252	0.580771	0.606026	0.490229	0.73169
SAM9cafb905b36a	0.502169	0.883101	0.846075	0.68946	0.749512	0.626535	0.455071	0.75412	0.61471	0.794286	0.927314	0.440652	0.503841	0.702925	0.825267	0.581038	0.764068	0.352688	0.776441	0.882871	0.686278	0.663592	0.464946	0.66495
SAM032c642382a7	0.564951	0.878346	0.807934	0.689333	0.734472	0.6088	0.459589	0.718136	0.608519	0.813562	0.895153	0.403226	0.43068	0.653562	0.768191	0.611498	0.72827	0.50386	0.775082	0.840145	0.657314	0.678967	0.481744	0.711571
SAMb419a8fcbfcd	0.292074	0.762866	0.607522	0.516942	0.716071	0.560761	0.394092	0.62957	0.4573	0.78245	0.668842	0.325861	0.428809	0.496773	0.737444	0.479862	0.703882	0.198657	0.685356	0.580061	0.531984	0.56032	0.436683	0.685092
SAM8884fe446d20	0.512046	0.925865	0.866376	0.727119	0.741496	0.658084	0.520512	0.752814	0.612518	0.872179	0.921909	0.566275	0.573651	0.683636	0.793352	0.637302	0.780014	0.637094	0.827045	0.848238	0.638812	0.713296	0.519093	0.700344
SAM2070b416069c	0.433351	0.772311	0.712421	0.637981	0.733536	0.62754	0.488251	0.674116	0.536487	0.8439	0.773234	0.505117	0.532601	0.598638	0.798466	0.502565	0.718874	0.408064	0.750984	0.653073	0.588655	0.618283	0.512165	0.629905
SAM0ce9c983b20f	0.527168	0.86762	0.755797	0.686257	0.764322	0.601527	0.51396	0.747055	0.595484	0.856921	0.902362	0.451616	0.608471	0.753619	0.790919	0.589614	0.747032	0.424108	0.786353	0.821501	0.648155	0.670312	0.502203	0.669688
SAMa1e62d323e1d	0.513308	0.841225	0.747276	0.606397	0.746174	0.583273	0.462012	0.718168	0.566681	0.827575	0.76267	0.38193	0.518542	0.679111	0.767304	0.516672	0.732439	0.309496	0.766401	0.708322	0.622187	0.626778	0.43681	0.650497
SAM61baf919bb01	0.657981	0.773673	0.775494	0.636539	0.748049	0.600699	0.397603	0.744723	0.625607	0.839143	0.869899	0.389371	0.593351	0.647199	0.832119	0.526489	0.781457	0.35507	0.750968	0.78075	0.653521	0.704407	0.436587	0.654905
SAM97a00e0929fb	0.494768	0.895052	0.753093	0.640119	0.719308	0.559288	0.42727	0.698751	0.551034	0.792474	0.735894	0.435263	0.360236	0.660664	0.816543	0.518941	0.714946	0.391559	0.719218	0.640925	0.557038	0.625397	0.465653	0.635967
SAM2f228939632f	0.442776	0.788463	0.739761	0.642981	0.724894	0.598359	0.484112	0.753828	0.569482	0.790928	0.815369	0.528548	0.403193	0.627334	0.801228	0.574572	0.770367	0.358888	0.781615	0.775998	0.625352	0.659973	0.514315	0.624636
SAM9539a4f19ebc	0.268674	0.72901	0.622786	0.602414	0.750935	0.604827	0.451942	0.701668	0.381728	0.824634	0.674778	0.404094	0.413206	0.651434	0.803649	0.463462	0.70946	0.352391	0.768051	0.63186	0.58004	0.595143	0.4901	0.665274
SAM36851bc8b9ae	0.490634	0.79252	0.774551	0.614605	0.736094	0.625738	0.440843	0.675329	0.527002	0.823483	0.780244	0.432689	0.397187	0.618613	0.81469	0.535924	0.712691	0.385905	0.763801	0.688233	0.582074	0.628453	0.482	0.63723
SAM297c0301e861	0.437429	0.891012	0.749529	0.651239	0.759951	0.574655	0.530112	0.746672	0.569906	0.861804	0.908114	0.487022	0.570459	0.746373	0.77811	0.613471	0.779095	0.521811	0.796519	0.868907	0.662959	0.693437	0.47819	0.712332
SAM1fa6bcb7fc48	0.421947	0.808388	0.72589	0.630214	0.762817	0.617951	0.411251	0.698491	0.50975	0.8364	0.746964	0.41295	0.522046	0.604319	0.82164	0.501008	0.707716	0.33814	0.715038	0.702823	0.571606	0.626287	0.508043	0.660104
SAM075e037d95bc	0.235068	0.703129	0.646021	0.530982	0.728091	0.633082	0.346432	0.639887	0.4026	0.823309	0.670185	0.0655231	0.533979	0.508397	0.781424	0.431103	0.642884	0.304851	0.695219	0.573341	0.516952	0.548417	0.341465	0.588116
SAM6d2ae0c39b96	0.483836	0.724654	0.703076	0.593981	0.736073	0.629794	0.4315	0.724036	0.524733	0.834625	0.734199	0.355059	0.478944	0.555398	0.774689	0.467513	0.713671	0.352162	0.731687	0.613742	0.578236	0.610782	0.451031	0.647803
SAMcabb6d58ff55	0.682025	0.830554	0.783543	0.671666	0.726764	0.656383	0.429687	0.715184	0.677452	0.809215	0.857131	0.400607	0.448851	0.630718	0.810582	0.584445	0.746248	0.452169	0.764828	0.811865	0.616865	0.658677	0.42797	0.651142
SAM716f54e468f4	0.630099	0.867796	0.809675	0.656148	0.738576	0.596108	0.475807	0.720728	0.626452	0.827374	0.848127	0.6089	0.492078	0.68834	0.812489	0.555132	0.754595	0.34041	0.760051	0.749136	0.626147	0.671862	0.49784	0.673038
SAMeff2ce356ccb	0.173935	0.749612	0.620649	0.547054	0.73161	0.622414	0.43646	0.69532	0.48492	0.798	0.636478	0.414587	0.424623	0.54624	0.75629	0.428318	0.660508	0.335731	0.713423	0.637429	0.538498	0.551083	0.396693	0.660031
SAM110501d0eedb	0.469503	0.734496	0.722444	0.616518	0.749128	0.624577	0.426959	0.710939	0.561434	0.807317	0.770501	0.309885	0.486726	0.642577	0.825172	0.492448	0.708672	0.407444	0.766673	0.678492	0.636164	0.608063	0.459858	0.645183
SAM2e9ac0b1b250	0.515208	0.852596	0.798674	0.636337	0.720782	0.600229	0.374364	0.742112	0.563607	0.832886	0.833154	0.310881	0.666608	0.643848	0.789667	0.574312	0.756492	0.378199	0.752733	0.797622	0.627598	0.621261	0.459866	0.642902
SAMc0ef41aa6c8b	0.0162513	0.603318	0.608882	0.538854	0.732693	0.611633	0.476254	0.692432	0.344531	0.816456	0.610376	0.298782	0.35329	0.482968	0.775924	0.424131	0.695932	0.3501	0.721039	0.575466	0.551792	0.589289	0.476811	0.574853
SAMd636e3461955	0.410133	0.779515	0.722286	0.684549	0.738991	0.583932	0.605832	0.759164	0.56659	0.890226	0.929614	0.379079	0.730844	0.825392	0.840242	0.638436	0.788425	0.589525	0.841526	0.860724	0.715874	0.710851	0.523106	0.708708
SAMe712352fb82a	0.395516	0.818052	0.694269	0.592689	0.707774	0.578935	0.378185	0.675905	0.491027	0.806739	0.699219	0.314408	0.526362	0.620224	0.791343	0.492947	0.660342	0.473833	0.755544	0.639813	0.543349	0.609107	0.481312	0.637764
SAM30b5c6c54cf7	0.303796	0.836244	0.706565	0.642231	0.737813	0.639346	0.371821	0.745491	0.462766	0.813357	0.816423	0.325444	0.505528	0.554257	0.749816	0.509408	0.724407	0.516693	0.745795	0.706675	0.595801	0.61663	0.475271	0.635031
SAMd98bac0a070f	0.402041	0.775368	0.650154	0.629715	0.755799	0.604226	0.56093	0.696712	0.481949	0.857664	0.781471	0.388552	0.588599	0.688581	0.808993	0.543994	0.741025	0.543665	0.783629	0.700216	0.581238	0.635076	0.475641	0.688282
SAM8e8ef2368dfa	0.500827	0.666805	0.707642	0.658231	0.748562	0.607888	0.432637	0.690311	0.582055	0.862461	0.873573	0.393936	0.522007	0.72344	0.821849	0.53303	0.789911	0.4512	0.792839	0.815682	0.624471	0.69031	0.491771	0.623254
SAM08cce2fa88f2	0.297118	0.68785	0.663451	0.517148	0.732256	0.616003	0.412211	0.690507	0.425719	0.801971	0.651134	0.0681588	0.530622	0.603908	0.787007	0.452943	0.670136	0.288847	0.735827	0.631628	0.534571	0.57314	0.338133	0.650899
SAMb4c7a001537d	0.287979	0.822717	0.728637	0.624696	0.754867	0.616847	0.438756	0.738358	0.47239	0.814237	0.728901	0.304492	0.564314	0.636291	0.815532	0.491112	0.716494	0.348031	0.722321	0.717865	0.578912	0.612984	0.441761	0.64869
SAMfd947610629d	0.358287	0.706958	0.67567	0.624577	0.744611	0.618157	0.456528	0.670156	0.49875	0.852209	0.758187	0.41743	0.540026	0.670954	0.833278	0.549596	0.750387	0.381859	0.776164	0.710609	0.61472	0.634661	0.458459	0.676476
SAM943df5cf15df	0.365614	0.78868	0.689158	0.653315	0.733583	0.619286	0.421037	0.710385	0.493859	0.849927	0.818184	0.423202	0.615906	0.610446	0.752691	0.560276	0.736443	0.488312	0.78929	0.741578	0.629906	0.629392	0.496186	0.679969
SAM31f41dd0d6ca	0.709113	0.822589	0.774878	0.618727	0.731274	0.6077	0.42499	0.704411	0.692508	0.808148	0.89054	0.478895	0.41548	0.678817	0.820404	0.57325	0.777853	0.369356	0.786179	0.787018	0.659272	0.686426	0.471833	0.650424
SAMb3c02294aba7	0.187205	0.797562	0.573797	0.57483	0.712155	0.597855	0.264317	0.670264	0.4065	0.795842	0.635492	0.344064	0.502712	0.619505	0.785492	0.523074	0.71117	0.376933	0.719903	0.590747	0.539022	0.585575	0.444884	0.661307
SAM39eb94fa504d	0.451976	0.78946	0.73716	0.649202	0.749584	0.626081	0.422811	0.758909	0.545237	0.859723	0.851332	0.361972	0.770545	0.63182	0.782184	0.563109	0.717016	0.451659	0.783226	0.783067	0.655814	0.642081	0.516964	0.641294
SAM62fb1388c871	0.438295	0.841457	0.702897	0.639076	0.714167	0.64134	0.459173	0.716598	0.479897	0.826034	0.778776	0.404973	0.476063	0.620909	0.826169	0.494724	0.734318	0.384076	0.751327	0.697939	0.571388	0.640685	0.514573	0.70509
SAMc0da5d48686d	0.340165	0.726273	0.629509	0.640027	0.717378	0.622893	0.430027	0.710073	0.464115	0.822821	0.723876	0.437055	0.635279	0.65498	0.77211	0.558978	0.699515	0.523972	0.807067	0.726537	0.626867	0.610815	0.460117	0.668316
SAMe7bcab05402e	0.397656	0.715424	0.67938	0.614651	0.755594	0.624161	0.490143	0.700829	0.534814	0.833507	0.860619	0.428581	0.509355	0.692678	0.824481	0.548173	0.770979	0.393186	0.791602	0.77018	0.635479	0.675444	0.436979	0.649644
SAM2570ff4aae6e	0.484037	0.820793	0.801606	0.661526	0.74593	0.571148	0.453911	0.740701	0.547893	0.866264	0.882139	0.444517	0.526315	0.709169	0.829572	0.566747	0.763322	0.525705	0.803051	0.813362	0.645236	0.691395	0.493416	0.704645
SAM2dc3f04e45e9	0.402827	0.872182	0.771322	0.684096	0.734325	0.584774	0.400048	0.671246	0.51835	0.798374	0.867627	0.659528	0.50633	0.616456	0.812604	0.567881	0.737952	0.283561	0.747228	0.787315	0.608385	0.668587	0.523568	0.657844
SAM4501e41e4751	0.551574	0.818623	0.762578	0.674673	0.730288	0.628509	0.429665	0.698099	0.624812	0.846228	0.872342	0.358246	0.544687	0.610857	0.774207	0.582632	0.765289	0.388806	0.793055	0.772105	0.620986	0.679871	0.484655	0.628247
SAM5b57e47fdcb3	0.449555	0.792184	0.717681	0.575524	0.735152	0.635568	0.4579	0.679199	0.521132	0.818778	0.767773	0.289593	0.360891	0.64987	0.77998	0.496038	0.700359	0.372783	0.735222	0.666521	0.573817	0.604754	0.447205	0.665788
SAMae4da274eded	0.656979	0.850526	0.764879	0.64645	0.742727	0.61983	0.466837	0.72241	0.654616	0.844139	0.83811	0.370753	0.565718	0.704679	0.83952	0.56164	0.720185	0.456575	0.760619	0.739286	0.647482	0.665037	0.452335	0.66233
SAMd35318127278	0.422243	0.867308	0.798672	0.623397	0.705161	0.734888	0.507321	0.719968	0.513821	0.804007	0.79677	0.418602	0.40368	0.535223	0.791037	0.564151	0.717394	0.3346	0.771469	0.669469	0.596401	0.613751	0.450626	0.674853
SAMa913c6139ec8	0.749796	0.878722	0.845616	0.652703	0.738805	0.608208	0.537467	0.736787	0.726832	0.888668	0.913358	0.364024	0.639404	0.818034	0.836	0.607382	0.764272	0.47532	0.801431	0.755356	0.655191	0.696551	0.516112	0.69463
SAM75142fcab9df	0.501954	0.79358	0.7749	0.635688	0.717134	0.610551	0.469781	0.69777	0.566699	0.850143	0.891388	0.405829	0.532227	0.695956	0.795349	0.543934	0.768186	0.443804	0.782838	0.827803	0.649826	0.692847	0.47802	0.693342
SAMd697ba701077	0.479628	0.788033	0.739303	0.621307	0.751634	0.615623	0.444134	0.698445	0.524612	0.811193	0.782835	0.375084	0.365357	0.663833	0.830345	0.522437	0.723354	0.334272	0.752017	0.690046	0.614579	0.642023	0.477269	0.660659
SAM166a419a4e5a	0.45125	0.78265	0.746191	0.647227	0.737398	0.580313	0.538011	0.708162	0.521616	0.844674	0.843446	0.613495	0.606678	0.766982	0.805992	0.575596	0.765469	0.490278	0.795604	0.765638	0.6203	0.67308	0.498711	0.706133
SAM025b45c27e05	0.304126	0.721859	0.613637	0.619955	0.722546	0.608717	0.473435	0.719594	0.478985	0.838869	0.833949	0.358618	0.528786	0.627058	0.763632	0.546319	0.761543	0.408021	0.786538	0.76705	0.605036	0.625924	0.460829	0.662928
SAMe07c4560772d	0.166009	0.704597	0.589721	0.492485	0.757857	0.631251	0.373558	0.647366	0.376976	0.783781	0.593087	0.394015	0.512531	0.556004	0.749118	0.429179	0.621156	0.231296	0.703418	0.580369	0.50452	0.541728	0.40202	0.643238
SAM560f23d6a3ad	0.622434	0.907827	0.868485	0.703477	0.732596	0.667504	0.520606	0.803341	0.712996	0.828523	0.954079	0.476948	0.568299	0.635423	0.823757	0.603397	0.7564	0.599238	0.803868	0.81065	0.657588	0.670081	0.571461	0.68858
SAM52500cabdd36	0.340843	0.760658	0.684927	0.549948	0.735679	0.573078	0.44345	0.679297	0.483392	0.817063	0.665706	0.339274	0.34469	0.667399	0.821194	0.482954	0.680874	0.33574	0.693211	0.622702	0.556455	0.596866	0.431429	0.66085
SAM14df63a65411	0.293307	0.745044	0.665497	0.644771	0.761021	0.616836	0.405117	0.69555	0.485568	0.844906	0.752719	0.394879	0.536031	0.519794	0.812603	0.53514	0.757134	0.375355	0.76252	0.687883	0.587453	0.595647	0.496729	0.695399
SAMf3a9bce50099	0.605488	0.803422	0.765764	0.607716	0.728444	0.587263	0.471551	0.691296	0.636351	0.844952	0.849985	0.342912	0.418152	0.737566	0.838402	0.553103	0.751313	0.354583	0.771105	0.755459	0.644933	0.676749	0.477017	0.634231
SAMffa5c7cad0e5	0.451105	0.789009	0.722519	0.689221	0.734308	0.593865	0.594601	0.775164	0.489709	0.866917	0.896444	0.343509	0.605443	0.784329	0.826418	0.597252	0.769013	0.517273	0.825318	0.830561	0.672491	0.685389	0.496581	0.689633
SAMdab9ca8fb5de	0.373436	0.777509	0.711349	0.629114	0.72975	0.594182	0.465429	0.698138	0.510089	0.840213	0.766946	0.361449	0.531397	0.658013	0.801074	0.528895	0.739996	0.350903	0.774666	0.69347	0.623211	0.646401	0.484665	0.680441
SAM34430ef08e5b	0.631478	0.859389	0.757737	0.63431	0.720568	0.613368	0.579359	0.688251	0.659867	0.861656	0.856082	0.468844	0.53949	0.728311	0.814143	0.524275	0.720304	0.478029	0.766758	0.736601	0.635761	0.67655	0.460378	0.701912
SAM4b0175e8db6e	0.558954	0.819042	0.727793	0.645188	0.727233	0.607247	0.423082	0.693384	0.585341	0.859635	0.856994	0.408892	0.37601	0.683103	0.804372	0.536976	0.761965	0.341465	0.772449	0.769305	0.609698	0.675493	0.494086	0.646432
SAMf28c01545593	0.125821	0.702661	0.562624	0.560269	0.730188	0.623116	0.403038	0.667288	0.43378	0.801991	0.62568	0.469486	0.521272	0.457623	0.784766	0.465076	0.6827	0.287339	0.676923	0.588392	0.523314	0.570799	0.449425	0.647329
SAMaec7380f9ab0	0.264066	0.831468	0.663897	0.61439	0.712055	0.563379	0.47369	0.694282	0.423047	0.802421	0.69581	0.307757	0.308266	0.520999	0.766422	0.487092	0.691702	0.362292	0.698469	0.709483	0.498484	0.564656	0.423352	0.668273
SAMe94c30c30616	0.444454	0.808607	0.72669	0.650269	0.72407	0.616405	0.501881	0.736079	0.532041	0.838874	0.832805	0.371476	0.578235	0.636921	0.816721	0.554116	0.74915	0.417748	0.788547	0.76474	0.630953	0.646944	0.487923	0.688486
SAM54e58f1b0230	0.226469	0.706633	0.601995	0.545734	0.729316	0.564992	0.409444	0.666131	0.373566	0.806866	0.582798	0.47505	0.529542	0.478113	0.79482	0.417418	0.648508	0.358464	0.722794	0.580782	0.496349	0.56089	0.46076	0.612407
SAM5e3bae090b8c	0.468704	0.816424	0.723113	0.632915	0.741069	0.598466	0.418847	0.690112	0.563918	0.851741	0.786513	0.430219	0.384414	0.566224	0.811414	0.515317	0.724918	0.369497	0.780665	0.762561	0.578015	0.607753	0.501093	0.685129
SAM3cb94b0d5297	0.560327	0.821105	0.803864	0.605321	0.715875	0.605368	0.455624	0.74049	0.618189	0.861208	0.885345	0.30077	0.579901	0.650188	0.826112	0.545595	0.762935	0.364217	0.758627	0.786201	0.655979	0.682293	0.504272	0.642088
SAM61b9d4d84c64	0.512223	0.830911	0.755385	0.620711	0.761441	0.597028	0.457876	0.722333	0.557228	0.761415	0.712571	0.316554	0.50135	0.697272	0.819363	0.487335	0.691633	0.374233	0.779393	0.652577	0.59511	0.63866	0.482481	0.665271
SAMcb132b0cdd2c	0.790752	0.899365	0.830679	0.655698	0.733319	0.611894	0.514589	0.718276	0.752567	0.829857	0.815235	0.359005	0.549	0.667248	0.833654	0.542576	0.732298	0.327059	0.733004	0.772568	0.633064	0.684124	0.50184	0.674388
SAMe97af0feefdf	0.390278	0.79187	0.713415	0.639469	0.740993	0.604602	0.453699	0.704238	0.476644	0.848444	0.766595	0.386331	0.540775	0.658858	0.831753	0.531766	0.741603	0.434237	0.768899	0.714916	0.621783	0.623203	0.516388	0.684892
SAMee3844cc0b9f	0.491474	0.755412	0.786823	0.638132	0.739482	0.632827	0.444451	0.773188	0.595115	0.825138	0.92057	0.435781	0.566329	0.697682	0.818543	0.579527	0.806122	0.359204	0.783648	0.822836	0.650594	0.701025	0.483216	0.642458
SAMdcae54fcd7fa	0.671819	0.834319	0.740215	0.632862	0.725155	0.61496	0.558007	0.717966	0.677875	0.860364	0.844811	0.454466	0.548505	0.784036	0.840453	0.573651	0.755195	0.588153	0.790489	0.737563	0.615652	0.691963	0.514243	0.676366
SAMdad5c29dc105	0.436263	0.79748	0.683312	0.574198	0.747734	0.611262	0.402227	0.69499	0.563578	0.822568	0.702076	0.331978	0.526738	0.609947	0.784262	0.494464	0.68982	0.279457	0.745887	0.66945	0.581251	0.619098	0.408754	0.663214
SAMa424c75831b4	0.3561	0.80519	0.748251	0.589744	0.763686	0.548614	0.470184	0.721361	0.531768	0.809607	0.793241	0.407096	0.52623	0.580924	0.771298	0.485941	0.708604	0.37716	0.719511	0.657276	0.550946	0.634004	0.398785	0.667902
SAM28687037e4ff	0.499513	0.879773	0.828074	0.654195	0.753112	0.605878	0.445593	0.749327	0.586142	0.859845	0.898928	0.464997	0.566641	0.725366	0.789693	0.628681	0.75977	0.43327	0.790224	0.840199	0.632618	0.681263	0.491325	0.702886
SAMe50d15fde368	0.195991	0.722864	0.613262	0.551051	0.758902	0.620719	0.326114	0.675412	0.371733	0.804262	0.638365	0.402316	0.487444	0.541461	0.809082	0.482993	0.693381	0.326401	0.718345	0.565197	0.523636	0.56772	0.442168	0.631366
SAM45c8e6412c66	0.502922	0.865493	0.791444	0.696161	0.748755	0.602245	0.429393	0.746593	0.555725	0.83901	0.888763	0.465232	0.534793	0.55361	0.779977	0.567457	0.755003	0.537206	0.747972	0.818662	0.637	0.657053	0.496546	0.667762
SAM8533e5e261d6	0.136488	0.696725	0.61313	0.584396	0.746909	0.613644	0.374664	0.684055	0.393945	0.807642	0.656783	0.670043	0.379643	0.525978	0.789786	0.480913	0.700111	0.428234	0.702278	0.588635	0.544	0.577912	0.460796	0.574583
SAMaaf505c36f93	0.471899	0.746827	0.659521	0.594662	0.759912	0.607352	0.4056	0.706152	0.570124	0.844232	0.767522	0.37284	0.51952	0.65479	0.813668	0.522485	0.715408	0.291816	0.753702	0.717381	0.592818	0.624563	0.445755	0.623462
SAM73663ee4a96e	0.559869	0.808627	0.733846	0.633625	0.747902	0.639079	0.419049	0.689768	0.605536	0.842261	0.82642	0.378818	0.430341	0.680429	0.819625	0.513569	0.742493	0.307392	0.755152	0.723096	0.62867	0.660798	0.480479	0.625626
SAM0bdb3428bd13	0.318642	0.663396	0.683017	0.618884	0.732084	0.630849	0.389084	0.762199	0.460203	0.841151	0.854181	0.327176	0.56137	0.651193	0.850233	0.499446	0.751161	0.320252	0.797119	0.793857	0.639781	0.661801	0.477041	0.61818
SAM3330c03fdf00	0.883768	0.900289	0.871583	0.681291	0.72714	0.639332	0.583499	0.734205	0.846147	0.809666	0.907018	0.520416	0.601551	0.736415	0.870373	0.614594	0.753652	0.38668	0.792186	0.830106	0.707384	0.708815	0.496836	0.687819
SAM0a7c2091dd56	0.500994	0.817639	0.698549	0.640508	0.7364	0.628398	0.428152	0.706539	0.563828	0.840933	0.831474	0.374082	0.540009	0.583553	0.781115	0.534649	0.737946	0.468478	0.776607	0.768275	0.600317	0.646374	0.45514	0.678314
SAM7bff231634e9	0.371734	0.832308	0.80048	0.624226	0.755749	0.653536	0.387457	0.68629	0.547787	0.81544	0.784565	0.55277	0.445241	0.51566	0.796083	0.563105	0.701342	0.408351	0.732779	0.729373	0.60074	0.621104	0.479381	0.635917
SAM5d1dfd5207f5	0.176034	0.65567	0.602114	0.49471	0.747675	0.612048	0.370999	0.650452	0.347448	0.794025	0.576313	0.328423	0.477024	0.520438	0.803601	0.447522	0.656586	0.236255	0.748627	0.557849	0.516791	0.558371	0.420696	0.643856
SAMeb587a68006b	0.468438	0.785005	0.681651	0.640925	0.752583	0.587055	0.476712	0.707838	0.483651	0.847487	0.791853	0.400698	0.45337	0.734679	0.798323	0.54354	0.745283	0.365032	0.773658	0.731318	0.623191	0.657428	0.507588	0.686269
SAM99a46b9eec27	0.539614	0.835925	0.76089	0.668481	0.726551	0.594518	0.515777	0.702056	0.599804	0.881426	0.869481	0.402579	0.537897	0.676104	0.798056	0.55914	0.765925	0.396667	0.782219	0.799792	0.645066	0.69043	0.514105	0.688123
SAM1ac4e3dee297	0.238152	0.686389	0.618253	0.553792	0.744003	0.623118	0.364956	0.683197	0.427948	0.786842	0.5984	0.36203	0.367083	0.579922	0.79557	0.424508	0.66482	0.282043	0.727713	0.565913	0.537117	0.57925	0.393054	0.62943
SAM553c3c35b847	0.630946	0.893793	0.86789	0.731382	0.758666	0.620879	0.568128	0.779673	0.648711	0.895569	0.996025	0.456742	0.569884	0.751746	0.837381	0.647511	0.813192	0.588291	0.821922	0.902027	0.705423	0.740261	0.536684	0.719202
SAM3e04eb914f3d	0.676998	0.836017	0.848054	0.656682	0.737059	0.623646	0.45238	0.728569	0.68067	0.821583	0.895063	0.436763	0.465815	0.663613	0.837531	0.580459	0.7731	0.370465	0.777915	0.802709	0.669989	0.686748	0.443074	0.654705
SAMc2a1820d4e6b	0.602955	0.835981	0.82714	0.654152	0.717315	0.587447	0.542224	0.710605	0.61575	0.826774	0.864029	0.628632	0.558848	0.72626	0.807092	0.589466	0.768131	0.435747	0.759854	0.736837	0.653925	0.696027	0.485945	0.671619
SAM822b226466a1	0.253023	0.639635	0.618072	0.499461	0.737829	0.605199	0.346454	0.67704	0.465704	0.797897	0.584672	0.37181	0.376676	0.550834	0.796377	0.469376	0.668279	0.200739	0.702022	0.558333	0.53098	0.583506	0.402109	0.600819
SAMabc151b01ea3	0.318928	0.757122	0.64986	0.654128	0.706774	0.654956	0.353177	0.73513	0.442628	0.785272	0.822566	0.377299	0.766009	0.568221	0.834595	0.537329	0.748459	0.609717	0.768098	0.74718	0.611663	0.641545	0.425677	0.599769
SAMe1eb5d988760	0.497885	0.860032	0.786421	0.618786	0.733295	0.612314	0.510534	0.722501	0.558114	0.856717	0.869515	0.505533	0.540598	0.663226	0.819264	0.580902	0.770088	0.363528	0.774496	0.781558	0.637964	0.678033	0.526585	0.711269
SAMe3210d3632b4	0.441989	0.860535	0.759515	0.698669	0.754769	0.62294	0.452502	0.750588	0.563889	0.87621	0.907609	0.451295	0.626799	0.657344	0.77093	0.595188	0.766247	0.579273	0.808297	0.862448	0.673521	0.67519	0.452386	0.682182
SAMb15ad09d6e24	0.624041	0.913098	0.876733	0.681159	0.748261	0.588392	0.596926	0.778928	0.663761	0.89396	0.946091	0.419573	0.628863	0.798791	0.84507	0.631023	0.774126	0.491909	0.796583	0.869996	0.698982	0.729485	0.509358	0.707237
SAM7893196e0e89	0.282405	0.766986	0.622103	0.612299	0.763108	0.5903	0.398088	0.686724	0.466166	0.85485	0.755364	0.495302	0.524179	0.589489	0.75391	0.530879	0.713978	0.434063	0.749802	0.70018	0.57571	0.596382	0.515866	0.665651
SAM961d04c42bd9	0.433946	0.825505	0.722581	0.654135	0.732214	0.604426	0.502743	0.729377	0.467695	0.817578	0.792398	0.478362	0.540553	0.694738	0.808272	0.529935	0.737722	0.429943	0.746644	0.680715	0.576443	0.642936	0.510254	0.656806
SAMb0d11db9aa79	0.505753	0.848094	0.801989	0.677541	0.727591	0.598709	0.502837	0.703521	0.567361	0.813134	0.826304	0.557052	0.567601	0.645937	0.784466	0.537944	0.7383	0.387191	0.755176	0.737206	0.626004	0.647735	0.516181	0.670819
SAM19fec8f3b3bd	0.329416	0.804634	0.681022	0.638415	0.756591	0.594164	0.428674	0.723661	0.477679	0.828721	0.840959	0.157935	0.55089	0.653117	0.758194	0.557696	0.697473	0.375003	0.7915	0.816133	0.590259	0.631303	0.401587	0.633982
SAM6083aac8db99	0.514657	0.830513	0.771065	0.635475	0.725146	0.651417	0.412077	0.714737	0.584309	0.849367	0.844117	0.343657	0.52673	0.691557	0.809722	0.56234	0.735625	0.400334	0.801595	0.748978	0.63972	0.65885	0.467331	0.655138
SAMa90d73f8d891	0.230049	0.726738	0.56316	0.52685	0.693971	0.596408	0.427926	0.705911	0.31894	0.799716	0.760291	0.373231	0.526716	0.474517	0.752155	0.478714	0.699098	0.398638	0.740324	0.707264	0.570503	0.559213	0.364663	0.599666
SAM415f36ad349e	0.373071	0.86408	0.677141	0.685369	0.706064	0.594089	0.543958	0.706555	0.49968	0.853661	0.864171	0.478814	0.57755	0.674714	0.801997	0.588748	0.754307	0.61404	0.774384	0.830082	0.626432	0.656272	0.554581	0.696749
SAM7c67b05aa109	0.198702	0.698663	0.581186	0.47989	0.743233	0.627987	0.377308	0.690857	0.367888	0.81462	0.626415	0.381781	0.601993	0.420153	0.803765	0.419563	0.661254	0.291995	0.706361	0.594515	0.54859	0.567447	0.539	0.613115
SAMad83c9c53537	0.449412	0.762971	0.648193	0.655153	0.739164	0.635195	0.417754	0.702896	0.522965	0.848169	0.808938	0.422408	0.403744	0.632324	0.809057	0.53916	0.757191	0.400803	0.780395	0.74064	0.573405	0.616648	0.490755	0.665902
SAM3e8baff50d7a	0.26544	0.794286	0.611802	0.662002	0.69618	0.615662	0.455895	0.700787	0.466902	0.8318	0.793915	0.476132	0.508809	0.525356	0.803257	0.477838	0.691647	0.346449	0.767368	0.704132	0.595219	0.593861	0.465282	0.67248
SAM3ee5dcd894f0	0.309962	0.812031	0.728505	0.713172	0.758465	0.672483	0.465436	0.753656	0.522618	0.853118	0.859271	0.416316	0.619001	0.725218	0.851452	0.573211	0.753981	0.672222	0.811083	0.77791	0.609811	0.629089	0.553146	0.67416
SAM8a1b0e02ee42	0.281523	0.723588	0.646704	0.589322	0.725852	0.594912	0.330712	0.663577	0.425599	0.806728	0.652559	0.428481	0.312271	0.63221	0.760736	0.475311	0.670663	0.335047	0.726362	0.599136	0.543698	0.583088	0.421148	0.644746
SAMd7d57ee3a863	0.531232	0.907148	0.853521	0.658923	0.72343	0.660809	0.459492	0.72988	0.594441	0.808544	0.905119	0.435946	0.533555	0.667589	0.759696	0.578308	0.774998	0.342562	0.722506	0.867604	0.637011	0.663893	0.435987	0.703322
SAMeb29625f76a5	0.373802	0.793085	0.707463	0.63361	0.775378	0.62247	0.459007	0.726325	0.501572	0.846122	0.766277	0.460086	0.395304	0.611604	0.818471	0.50365	0.737755	0.286034	0.744138	0.694641	0.598499	0.629169	0.433939	0.646247
SAM563d6233dfa2	0.232061	0.630899	0.507444	0.60669	0.670073	0.617221	0.416408	0.663385	0.452824	0.800033	0.671563	0.361248	0.40406	0.486149	0.765853	0.47467	0.709388	0.329377	0.74149	0.616862	0.489607	0.574664	0.522721	0.59584
SAMa1871f491b02	0.240861	0.756126	0.661738	0.605989	0.714953	0.639833	0.377716	0.693152	0.483551	0.822722	0.709277	0.429751	0.527161	0.470596	0.802669	0.448456	0.68813	0.551434	0.755697	0.566031	0.546165	0.5767	0.528394	0.657003
SAM30cf07d4874f	0.625303	0.874195	0.78292	0.641326	0.733745	0.572679	0.58346	0.708358	0.653897	0.847478	0.873482	0.345708	0.621417	0.797949	0.783663	0.595643	0.769517	0.4815	0.787415	0.781307	0.6435	0.68712	0.498038	0.737802
SAMd135d5867fe3	0.393204	0.872116	0.759231	0.67145	0.731277	0.584	0.473767	0.7848	0.600097	0.854897	0.930926	0.417768	0.563821	0.726751	0.811713	0.587267	0.742508	0.483958	0.794646	0.863539	0.6531	0.668902	0.457259	0.701847
SAM9e11ec6bea80	0.388397	0.886021	0.805741	0.657196	0.705392	0.59043	0.443398	0.779508	0.539765	0.847294	0.873744	0.441106	0.595113	0.664808	0.77448	0.570185	0.74382	0.438641	0.776219	0.833601	0.658674	0.661008	0.457607	0.690745
SAM065890737112	0.441935	0.820866	0.74656	0.633418	0.761412	0.604646	0.425315	0.699221	0.524903	0.828507	0.769245	0.462586	0.485597	0.579117	0.811825	0.507804	0.688523	0.370301	0.744138	0.6365	0.582377	0.620408	0.457014	0.665333
SAMb470eb8f04be	0.471834	0.83955	0.732229	0.59432	0.735009	0.601171	0.471663	0.733239	0.566412	0.827591	0.789104	0.3718	0.533526	0.637727	0.770603	0.517884	0.73554	0.398625	0.724704	0.72475	0.580809	0.624389	0.466454	0.71156
SAM675a12a09c15	0.252397	0.651372	0.62657	0.578087	0.723144	0.61169	0.458222	0.6716	0.469838	0.816168	0.734564	0.353414	0.372587	0.632829	0.761891	0.501132	0.734304	0.304011	0.766032	0.658513	0.57941	0.620073	0.502003	0.623572
SAM1e9c4d1d39ae	0.366078	0.838865	0.699386	0.622392	0.736088	0.597344	0.388527	0.667107	0.500311	0.800898	0.719164	0.548036	0.301382	0.593231	0.775923	0.526121	0.734691	0.489735	0.773132	0.649912	0.561537	0.609779	0.503953	0.688917
SAM5a2347c0498a	0.359647	0.767614	0.662563	0.622778	0.722135	0.597265	0.358698	0.729798	0.506225	0.81107	0.679752	0.438281	0.4091	0.612831	0.815677	0.511322	0.671972	0.367573	0.762977	0.603209	0.552805	0.59874	0.447043	0.644459
SAM0571f17f4045	0.922678	0.959998	0.900842	0.68408	0.709533	0.606649	0.518483	0.708192	0.900451	0.787034	0.934067	0.422115	0.43031	0.696266	0.843931	0.580134	0.727538	0.37452	0.762939	0.798339	0.704329	0.693241	0.48384	0.653844
SAM4b7ea015fd9e	0.247452	0.698199	0.559001	0.52072	0.727201	0.623229	0.427039	0.663464	0.482445	0.78046	0.629009	0.355871	0.377499	0.479752	0.772871	0.412055	0.623917	0.119155	0.688357	0.564802	0.512943	0.568463	0.445177	0.635369
SAM9306c5c92444	0.429048	0.857748	0.739523	0.615173	0.738875	0.613272	0.370792	0.700014	0.539632	0.831812	0.754263	0.500999	0.442185	0.602096	0.803218	0.521492	0.709212	0.421312	0.724896	0.676733	0.562539	0.62402	0.492491	0.683645
SAMb15ac6e4c4ef	0.540485	0.79239	0.739699	0.659	0.755824	0.623337	0.41494	0.691551	0.576864	0.840044	0.818142	0.364948	0.503795	0.620107	0.810755	0.523417	0.733573	0.415525	0.747442	0.719248	0.593129	0.652366	0.536658	0.63072
SAM28e6031ac18b	0.110265	0.638183	0.601825	0.544557	0.717105	0.594531	0.340983	0.678825	0.343902	0.793219	0.623282	0.406463	0.371344	0.457439	0.781215	0.483448	0.660531	0.302751	0.703747	0.582346	0.488277	0.576866	0.398799	0.597268
SAMd86389d0d768	0.198943	0.669309	0.643462	0.543029	0.774525	0.612425	0.42819	0.684453	0.421172	0.839382	0.627519	0.266452	0.498204	0.646663	0.800306	0.443438	0.662259	0.312706	0.733149	0.590837	0.540584	0.587139	0.479471	0.578433
SAM63b2189c36d7	0.429957	0.726716	0.650284	0.559733	0.751382	0.609762	0.418024	0.698255	0.526054	0.779531	0.670005	0.329005	0.494369	0.629826	0.824428	0.476296	0.658881	0.376622	0.717015	0.653275	0.527713	0.603234	0.46668	0.651868
SAM18be5b395318	0.351445	0.862814	0.734439	0.615254	0.717341	0.564934	0.419378	0.678907	0.512298	0.824573	0.760126	0.371247	0.531339	0.635211	0.805474	0.454667	0.706133	0.372504	0.767711	0.696383	0.583038	0.630905	0.457817	0.658221
SAM0d855cff64e6	0.300039	0.842913	0.691642	0.661773	0.742368	0.586023	0.491346	0.69987	0.502375	0.848509	0.746367	0.513338	0.4655	0.650288	0.776977	0.516385	0.702233	0.610787	0.786033	0.71591	0.536872	0.586458	0.477362	0.658369
SAM6cbc10abddb0	0.400664	0.852858	0.804513	0.658385	0.731627	0.636993	0.502572	0.729678	0.523739	0.865496	0.881347	0.384048	0.602397	0.638495	0.763862	0.545545	0.723412	0.463325	0.773514	0.813437	0.636024	0.639159	0.503963	0.688642
SAMdee1011782cd	0.70898	0.745052	0.82733	0.658549	0.720994	0.635211	0.459045	0.703555	0.669515	0.81869	0.86393	0.431474	0.561888	0.755445	0.830667	0.598481	0.775201	0.388373	0.769094	0.75791	0.672013	0.705415	0.455552	0.635805
SAMe9475f77504b	0.341669	0.816251	0.762946	0.599286	0.707911	0.582461	0.491546	0.720097	0.479009	0.817315	0.75776	0.419161	0.543748	0.734435	0.770595	0.533521	0.739857	0.347317	0.77307	0.763266	0.598864	0.629643	0.420957	0.704994
SAMa535fcdf18a0	0.317112	0.83455	0.720542	0.607726	0.726733	0.607686	0.538628	0.687875	0.454326	0.845244	0.714252	0.294116	0.517083	0.718492	0.770476	0.502095	0.689575	0.406641	0.781541	0.651179	0.534265	0.620443	0.48713	0.705507
SAM548551ef782c	0.378589	0.7781	0.643079	0.616165	0.71114	0.611449	0.372704	0.693108	0.466448	0.800432	0.708974	0.364072	0.502227	0.589374	0.797863	0.507151	0.708333	0.471517	0.770705	0.652285	0.566592	0.603281	0.470461	0.639459
SAM203dcf14f927	0.633786	0.884665	0.856856	0.638597	0.744324	0.597973	0.431718	0.704885	0.66191	0.843448	0.876522	0.374405	0.419391	0.656633	0.838213	0.595808	0.751229	0.417573	0.757179	0.786182	0.666198	0.674081	0.464665	0.717591
SAMe41b1e773582	0.438648	0.80897	0.757707	0.622643	0.749246	0.577736	0.426256	0.698274	0.551917	0.817108	0.780897	0.423686	0.549789	0.604407	0.779244	0.516491	0.740894	0.487322	0.754057	0.672622	0.601994	0.618375	0.446909	0.656455
SAM978a587b207e	0.36774	0.788477	0.731598	0.638509	0.740068	0.609558	0.383214	0.766665	0.450702	0.827102	0.857808	0.445459	0.576133	0.700415	0.834238	0.534455	0.757769	0.397685	0.784768	0.775665	0.613769	0.663901	0.512951	0.655916
SAM5234688806a7	0.239623	0.706152	0.665165	0.532514	0.729909	0.639598	0.419513	0.638077	0.446312	0.818895	0.682004	0.437237	0.230798	0.537004	0.801364	0.472843	0.680184	0.271985	0.725861	0.612685	0.551324	0.573841	0.408608	0.619832
SAM2c9586161ce6	0.258075	0.7748	0.621822	0.591128	0.731129	0.609905	0.394682	0.67379	0.459957	0.82597	0.688934	0.358698	0.376215	0.520315	0.796733	0.469546	0.664327	0.311156	0.714392	0.590311	0.538862	0.561257	0.419975	0.632348
SAM76a431ba6ce1	0.520136	0.808004	0.733873	0.662278	0.741223	0.610814	0.430367	0.718314	0.573981	0.873313	0.90506	0.486783	0.501608	0.682585	0.815109	0.554176	0.777323	0.449001	0.800366	0.840555	0.631129	0.683664	0.519156	0.689999
SAM8f2275c36e8c	0.296288	0.74926	0.646667	0.614032	0.733782	0.620577	0.382189	0.666335	0.480158	0.837228	0.723101	0.368285	0.394235	0.560274	0.820956	0.482295	0.720232	0.393181	0.754157	0.679394	0.535506	0.573746	0.501469	0.631186
SAMab8052a03398	0.584155	0.762503	0.766289	0.651136	0.741098	0.648293	0.484013	0.777172	0.624488	0.84964	0.94647	0.448679	0.599777	0.75372	0.8023	0.636847	0.790145	0.544905	0.805185	0.829019	0.686839	0.724342	0.446419	0.626404
SAMd3bd67996035	0.771718	0.894541	0.839246	0.685485	0.71065	0.610969	0.534021	0.701544	0.7427	0.828146	0.885108	0.409668	0.512719	0.667865	0.836552	0.534655	0.74496	0.382291	0.764906	0.762605	0.677497	0.702623	0.505782	0.662742
SAM753d4bb52dbe	0.590365	0.816953	0.773088	0.613994	0.752591	0.605939	0.482377	0.710366	0.591318	0.844146	0.828487	0.364409	0.497426	0.742463	0.816377	0.547808	0.746318	0.330978	0.776222	0.729674	0.606886	0.6551	0.47173	0.648253
SAMd3601288319e	0.577406	0.891652	0.838323	0.610661	0.701401	0.59018	0.450292	0.739063	0.61825	0.821389	0.810221	0.42812	0.522684	0.673584	0.827983	0.568335	0.739262	0.338479	0.755807	0.775374	0.636806	0.676515	0.505253	0.694696
SAM59f392864f5d	0.500648	0.870018	0.792977	0.635645	0.708673	0.585298	0.533572	0.703178	0.571069	0.837315	0.818326	0.288105	0.531736	0.745125	0.811527	0.537029	0.746435	0.44651	0.817979	0.744219	0.625185	0.663189	0.494313	0.734561
SAM26104d5adc89	0.35156	0.749066	0.643964	0.615157	0.756512	0.606056	0.490821	0.686377	0.425466	0.842054	0.717692	0.366722	0.424832	0.669477	0.79931	0.507946	0.744801	0.335894	0.783588	0.714481	0.581815	0.615099	0.437171	0.670979
SAMba1a34b5a060	0.541154	0.851604	0.744141	0.663401	0.757107	0.593455	0.459723	0.738756	0.571869	0.853874	0.854543	0.338639	0.503945	0.733721	0.796166	0.578453	0.746017	0.491231	0.766548	0.770936	0.611763	0.671154	0.502958	0.687815
SAM18a4dabbc557	0.332096	0.832261	0.784246	0.661042	0.718828	0.568831	0.425733	0.755748	0.536149	0.820702	0.834171	0.329978	0.640584	0.670713	0.814332	0.526217	0.717645	0.464464	0.793858	0.765554	0.62521	0.645319	0.490871	0.626345
SAMfb7aec7cb0e2	0.471983	0.901947	0.768752	0.668034	0.73519	0.579822	0.416713	0.69699	0.566909	0.84223	0.890404	0.555993	0.513768	0.648456	0.796548	0.569016	0.750455	0.514721	0.787869	0.828708	0.640844	0.67517	0.525355	0.702816
SAMfed609955db9	0.319579	0.771721	0.645379	0.618993	0.726022	0.599678	0.424493	0.730267	0.500614	0.836591	0.770362	0.462756	0.511922	0.625591	0.810118	0.539713	0.720542	0.432103	0.769042	0.727831	0.601977	0.62505	0.496517	0.680222
SAMb8070b7937e7	0.353049	0.737514	0.683516	0.628284	0.752312	0.598085	0.472905	0.694689	0.486295	0.840759	0.76387	0.39059	0.517925	0.612648	0.831304	0.467991	0.701974	0.444105	0.74158	0.70108	0.56959	0.628644	0.505718	0.619846
SAMf2aae1443f67	0.236356	0.727466	0.663664	0.61347	0.739743	0.627722	0.397046	0.690198	0.45743	0.811091	0.720198	0.559509	0.572604	0.572626	0.788085	0.460136	0.706826	0.437677	0.732298	0.626828	0.542639	0.584085	0.475873	0.658027
SAM2bba8cb35e48	0.381054	0.796909	0.718955	0.605766	0.726687	0.587816	0.466979	0.705351	0.469902	0.813644	0.775021	0.3227	0.559664	0.643606	0.806588	0.511781	0.73349	0.400158	0.78854	0.759528	0.622116	0.637098	0.47505	0.658687
SAM5c139c5c1c4f	0.386423	0.807197	0.694633	0.582037	0.749038	0.555525	0.486781	0.687309	0.450088	0.857034	0.731396	0.549125	0.49129	0.675047	0.775976	0.502057	0.709116	0.497087	0.756966	0.686367	0.562122	0.605936	0.451081	0.662266
SAMc1251c7bfee2	0.365087	0.823645	0.713425	0.612623	0.730253	0.624842	0.432704	0.756638	0.524338	0.771213	0.793566	0.388372	0.514377	0.536691	0.739716	0.523431	0.710983	0.519744	0.780435	0.766522	0.557749	0.608279	0.459611	0.664332
SAM6780ed436b55	0.410755	0.859423	0.769514	0.608884	0.732797	0.588764	0.438251	0.682613	0.50008	0.819306	0.849801	0.389704	0.395556	0.630657	0.759192	0.56379	0.746597	0.304216	0.738814	0.72738	0.606122	0.643123	0.457619	0.687427
SAM85f0a3ac1c45	0.383294	0.762501	0.646657	0.586319	0.766986	0.614821	0.369864	0.67326	0.444994	0.811868	0.659446	0.35649	0.547488	0.561672	0.803004	0.460699	0.66724	0.371068	0.717645	0.600433	0.536647	0.58961	0.47901	0.653349
SAM9d2494119c05	0.281274	0.734162	0.62867	0.587066	0.706048	0.646728	0.412329	0.726069	0.426949	0.811695	0.701028	0.320258	0.751047	0.545343	0.845049	0.538091	0.717099	0.425741	0.743413	0.699754	0.553323	0.620632	0.492537	0.617161
SAM9410b866974a	0.403156	0.790731	0.722831	0.633075	0.714349	0.612665	0.44098	0.705296	0.565661	0.867503	0.890504	0.4455	0.574505	0.589112	0.78363	0.573866	0.76542	0.372788	0.764074	0.82087	0.669881	0.652316	0.482785	0.645981
SAM5d989c86255e	0.382244	0.805856	0.685838	0.602379	0.756429	0.562715	0.43207	0.730546	0.466638	0.83964	0.795767	0.306493	0.543376	0.715745	0.803364	0.504756	0.736342	0.384311	0.786233	0.726804	0.613876	0.654498	0.437616	0.668364
SAM27299aed7681	0.330466	0.775518	0.678039	0.581083	0.753857	0.617877	0.371065	0.682324	0.432539	0.82419	0.72259	0.480691	0.465768	0.567131	0.804014	0.45533	0.689787	0.395196	0.710901	0.647246	0.557573	0.579324	0.478503	0.683521
SAM49d48750e294	0.460314	0.730483	0.668515	0.594187	0.718466	0.62717	0.465293	0.672194	0.510411	0.857942	0.784667	0.344757	0.46041	0.616648	0.807529	0.550761	0.734715	0.369705	0.775576	0.737562	0.581874	0.632663	0.48392	0.641207
SAMd43f8933066b	0.539279	0.842081	0.82512	0.65141	0.726981	0.586033	0.507314	0.685951	0.601741	0.816911	0.834576	0.415936	0.606756	0.763106	0.811601	0.553235	0.748106	0.405789	0.775628	0.735854	0.607033	0.686623	0.503368	0.691063
SAM7aa01fc49a80	0.669294	0.83852	0.78083	0.648222	0.751035	0.587391	0.618575	0.750152	0.663928	0.849408	0.853881	0.400024	0.649796	0.798685	0.841677	0.601818	0.756353	0.519197	0.807918	0.784455	0.646226	0.694599	0.526938	0.715942
SAM0257bbbbd388	0.399056	0.772471	0.69616	0.6113	0.742706	0.595357	0.381754	0.690861	0.500474	0.84034	0.730919	0.340216	0.453775	0.654432	0.824176	0.517338	0.710926	0.427209	0.761406	0.681281	0.595346	0.621753	0.495768	0.66623
SAMc919aebc7fdd	0.692718	0.864419	0.819575	0.645684	0.718019	0.595857	0.566491	0.708179	0.653921	0.847621	0.868193	0.556329	0.382888	0.697658	0.818548	0.565362	0.747305	0.436049	0.763122	0.740256	0.678409	0.683423	0.512614	0.690968
SAMa321770ac31c	0.464303	0.784028	0.735282	0.628944	0.733095	0.637914	0.363855	0.707592	0.532106	0.765888	0.785719	0.426778	0.408287	0.543399	0.752188	0.560966	0.724383	0.36027	0.731395	0.66984	0.592335	0.63386	0.479075	0.662708
SAM3894ac3956a5	0.478402	0.746422	0.723233	0.646618	0.7449	0.601365	0.458131	0.707964	0.54479	0.850673	0.800075	0.390581	0.541482	0.688361	0.824664	0.554362	0.748667	0.411857	0.770766	0.736566	0.61861	0.659139	0.514434	0.654135
SAM1c0ecfb3eb63	0.61381	0.886622	0.775875	0.641143	0.767829	0.611344	0.491964	0.726868	0.632145	0.873303	0.892992	0.418464	0.564637	0.754993	0.78038	0.593799	0.759817	0.437017	0.793189	0.80463	0.642517	0.68614	0.502343	0.731952
SAMbcb07ba81cee	0.333735	0.832079	0.712685	0.590942	0.739613	0.604115	0.535561	0.650345	0.486002	0.822895	0.775598	0.225874	0.398342	0.589572	0.762237	0.505329	0.679845	0.379561	0.748785	0.711649	0.590144	0.631608	0.449668	0.674505
SAM9aa6a095a9d6	0.478448	0.75094	0.723534	0.626784	0.721757	0.621598	0.453457	0.707433	0.537531	0.842461	0.829577	0.393911	0.371958	0.610679	0.774102	0.526811	0.741988	0.383702	0.754821	0.742252	0.616805	0.660326	0.477326	0.675583
SAM957378bd907f	0.866053	0.940256	0.880257	0.672083	0.731082	0.615051	0.584642	0.732801	0.823859	0.834713	0.923924	0.560088	0.544688	0.751071	0.879362	0.64156	0.761728	0.458203	0.803604	0.84015	0.705613	0.72207	0.513282	0.670413
SAMf82bbdc267c8	0.10882	0.696123	0.588065	0.511807	0.747303	0.590554	0.386272	0.680168	0.354741	0.808108	0.607241	0.0933917	0.551372	0.56859	0.786965	0.405492	0.650926	0.240401	0.723503	0.593815	0.516323	0.530415	0.378945	0.611256
SAM2624229effe8	0.523196	0.731261	0.722743	0.581999	0.732767	0.596463	0.519917	0.691795	0.518917	0.846905	0.765496	0.355249	0.451524	0.717504	0.792182	0.549997	0.750768	0.367696	0.779641	0.726134	0.624242	0.652378	0.450188	0.660561
SAMd2492b2a31bb	0.333223	0.800263	0.703684	0.665406	0.74383	0.641202	0.494324	0.75561	0.494863	0.852045	0.868275	0.432455	0.570443	0.682797	0.770412	0.59178	0.774912	0.445842	0.79097	0.863327	0.642308	0.658781	0.501935	0.690838
SAM670649e105b5	0.442966	0.813984	0.711282	0.618402	0.737866	0.630461	0.411902	0.746304	0.546218	0.86785	0.866061	0.338518	0.55763	0.647675	0.805285	0.549077	0.7485	0.440288	0.789404	0.783819	0.640562	0.652638	0.479154	0.635902
SAM91c47b054ffb	0.461776	0.844045	0.782161	0.589767	0.740666	0.593136	0.375509	0.676944	0.489515	0.807684	0.769652	0.359804	0.519559	0.576905	0.778782	0.531109	0.707609	0.271924	0.704755	0.664694	0.585881	0.630098	0.432945	0.662885
SAM5fe7a81a39dd	0.526486	0.848519	0.788727	0.62662	0.735258	0.624883	0.542058	0.690602	0.551399	0.841248	0.818898	0.303666	0.455411	0.692424	0.804272	0.529808	0.729345	0.464641	0.752951	0.722706	0.595278	0.651285	0.442581	0.691191
SAM29da928587ad	0.528973	0.76032	0.708212	0.614403	0.728174	0.620729	0.506194	0.694613	0.547244	0.831362	0.781503	0.389838	0.538161	0.620947	0.809211	0.505291	0.74761	0.421994	0.757818	0.727953	0.594966	0.649775	0.484441	0.649463
SAM0a0f2bac4b20	0.425925	0.833263	0.724537	0.656492	0.730409	0.585975	0.484293	0.721688	0.603324	0.855447	0.855693	0.46131	0.559979	0.649267	0.771302	0.574271	0.751128	0.478189	0.783507	0.825086	0.629601	0.662481	0.511083	0.703469
SAM8e469834acc1	0.394384	0.693025	0.677973	0.612494	0.73846	0.606198	0.456122	0.673715	0.463306	0.835917	0.752234	0.330306	0.417116	0.710718	0.815658	0.526931	0.745589	0.306469	0.776158	0.691459	0.609508	0.637074	0.50582	0.642986
SAM12502d970c10	0.461634	0.797966	0.689807	0.636994	0.75474	0.629941	0.429434	0.702234	0.548241	0.856761	0.765806	0.404693	0.554109	0.664937	0.823236	0.524756	0.728845	0.452096	0.764421	0.7328	0.573476	0.632439	0.493761	0.662838
SAM7d7c54623618	0.327655	0.796112	0.642112	0.594331	0.714617	0.583124	0.395718	0.714694	0.450668	0.777029	0.704098	0.376666	0.41406	0.599127	0.768029	0.513976	0.692995	0.395665	0.733508	0.689993	0.543563	0.580351	0.411984	0.727055
SAM181b638b8248	0.634748	0.840108	0.802625	0.685514	0.733015	0.593881	0.496069	0.727926	0.65698	0.889111	0.91435	0.416917	0.555	0.74828	0.801147	0.580488	0.786699	0.459669	0.80524	0.880379	0.660926	0.712209	0.518267	0.695179
SAMbfdffb97c446	0.485873	0.868177	0.756171	0.638467	0.724319	0.583188	0.489745	0.722804	0.554893	0.853077	0.832453	0.444682	0.542118	0.701994	0.805605	0.561998	0.748761	0.531869	0.798408	0.774656	0.631608	0.665184	0.482033	0.714453
SAM3b15b4c6311d	0.454782	0.830196	0.779832	0.669205	0.758497	0.65888	0.386232	0.709526	0.510355	0.827614	0.82999	0.497066	0.541695	0.611355	0.793337	0.569861	0.730465	0.590609	0.789732	0.774733	0.599041	0.619448	0.491811	0.692871
SAM1c8b086175ca	0.418153	0.732027	0.715086	0.626249	0.729305	0.608945	0.468433	0.688415	0.538778	0.840903	0.788349	0.385941	0.47567	0.756294	0.81801	0.543986	0.755486	0.29467	0.781499	0.752255	0.611082	0.665427	0.467786	0.650621
SAMeaa477a5384b	0.586934	0.849323	0.826676	0.649425	0.729663	0.6627	0.473228	0.67645	0.657943	0.817044	0.861113	0.615447	0.372952	0.61347	0.790288	0.555121	0.740035	0.389043	0.736915	0.706253	0.644044	0.63351	0.476184	0.650215
SAM1dda30f1c5be	0.405266	0.795026	0.691813	0.613151	0.730697	0.628597	0.549488	0.737185	0.511776	0.850171	0.828052	0.439501	0.618104	0.700655	0.807636	0.560335	0.77801	0.371339	0.78218	0.802479	0.618639	0.670068	0.475117	0.687651
SAM9daccafc18db	0.367498	0.760752	0.657136	0.576705	0.733308	0.592434	0.396637	0.692258	0.560724	0.821485	0.792958	0.167215	0.522938	0.577512	0.771633	0.498038	0.735596	0.221072	0.724309	0.750074	0.595196	0.636829	0.432773	0.634238
SAM2eb07dedf07f	0.736172	0.887328	0.858104	0.665813	0.720553	0.59163	0.528528	0.733156	0.731191	0.856994	0.914065	0.442447	0.516321	0.775688	0.821249	0.618881	0.779904	0.445395	0.780383	0.837736	0.652899	0.713993	0.40475	0.675453
SAM25510f300d79	0.100095	0.72888	0.595352	0.604928	0.73443	0.588934	0.411057	0.705918	0.408128	0.847596	0.753362	0.381852	0.539867	0.576049	0.771138	0.509239	0.694763	0.489945	0.770975	0.671467	0.599125	0.576601	0.487216	0.623026
SAMbda79f955628	0.557476	0.891332	0.904351	0.610916	0.721736	0.584622	0.459368	0.685472	0.594395	0.823959	0.846242	0.193089	0.596937	0.635157	0.81179	0.616614	0.761148	0.40061	0.757453	0.716456	0.641324	0.694121	0.461026	0.698228
SAM187e056d6a2a	0.421135	0.710694	0.65154	0.630742	0.728374	0.62299	0.382052	0.734219	0.491761	0.848159	0.783682	0.445201	0.534924	0.648575	0.843262	0.517272	0.737168	0.311245	0.761002	0.725483	0.606474	0.635979	0.497579	0.65151
SAMbc8dc3a7b54e	0.161921	0.693768	0.573957	0.545837	0.733003	0.559693	0.31012	0.677387	0.421921	0.793473	0.601055	0.391522	0.256722	0.512086	0.810306	0.420244	0.678016	0.291431	0.711432	0.562558	0.514695	0.556673	0.358952	0.608615
SAM7b40007f4aa4	0.205437	0.708168	0.534709	0.522984	0.73281	0.597754	0.354637	0.626714	0.36259	0.76287	0.609111	0.505673	0.445059	0.442928	0.750179	0.420985	0.690625	0.276287	0.705066	0.495005	0.485806	0.529129	0.456572	0.68969
SAM568ce160abd9	0.45944	0.675791	0.722055	0.614492	0.738351	0.541992	0.507732	0.702587	0.546165	0.857619	0.788753	0.309256	0.567242	0.786554	0.812954	0.534889	0.754115	0.494221	0.786269	0.712994	0.611866	0.658818	0.426162	0.64089
SAM14938611a2d3	0.479201	0.812387	0.703469	0.643744	0.754585	0.570072	0.435062	0.692757	0.575323	0.798814	0.761406	0.390309	0.343927	0.718653	0.810441	0.491569	0.728244	0.373852	0.788525	0.647325	0.596705	0.643049	0.500866	0.653711
SAM1a87df750b9d	0.423516	0.861898	0.747839	0.65222	0.732355	0.63093	0.433082	0.711538	0.572341	0.838055	0.82689	0.393746	0.545276	0.659307	0.763922	0.562199	0.723369	0.451154	0.743025	0.768305	0.605192	0.643542	0.474549	0.71014
SAMae02629a97f7	0.235796	0.677386	0.634215	0.554426	0.749167	0.59213	0.378472	0.6885	0.368997	0.823634	0.679312	0.309467	0.426936	0.582187	0.794865	0.488048	0.670265	0.33174	0.704853	0.6227	0.555444	0.610177	0.409133	0.634846
SAM47fc46c3d6be	0.543603	0.866957	0.803568	0.663918	0.734219	0.597992	0.508439	0.704361	0.599957	0.837297	0.966954	0.475587	0.541284	0.745652	0.823686	0.616652	0.791108	0.448842	0.766601	0.831946	0.706477	0.703971	0.455117	0.700069
SAM7829a341b9f3	0.469888	0.865402	0.725826	0.662548	0.718868	0.628366	0.504499	0.685335	0.527986	0.813369	0.826666	0.514374	0.522969	0.612018	0.790406	0.543639	0.738206	0.36915	0.750662	0.706771	0.618736	0.621461	0.517812	0.687981
SAM0f956e757453	0.429	0.723877	0.711475	0.637392	0.717995	0.599375	0.471658	0.707465	0.550772	0.812482	0.810545	0.357652	0.426872	0.694975	0.830615	0.510152	0.760271	0.377127	0.751734	0.710353	0.625704	0.658223	0.487153	0.63724
SAMaf42c1541269	0.453641	0.89784	0.876551	0.652779	0.730281	0.592449	0.484725	0.732303	0.566331	0.833728	0.920769	0.145167	0.550439	0.748214	0.808047	0.589177	0.757037	0.456476	0.786338	0.816794	0.695071	0.699538	0.471765	0.703251
SAM09c84ec0cf34	0.0720819	0.65845	0.427607	0.609364	0.716411	0.645192	0.367241	0.711477	0.321803	0.861018	0.74559	0.37043	0.567979	0.568833	0.811616	0.508111	0.73582	0.377249	0.761138	0.713709	0.556987	0.571671	0.420652	0.627503
SAM7538ad9ff524	0.314108	0.766094	0.696558	0.676047	0.764601	0.638666	0.416291	0.704433	0.498426	0.834039	0.828901	0.757321	0.57413	0.658502	0.787678	0.513622	0.729734	0.588277	0.749113	0.73119	0.613713	0.598637	0.509625	0.626738
SAMb2e4a082541a	0.888953	0.870534	0.845432	0.694022	0.704709	0.618609	0.615304	0.709933	0.902728	0.814422	0.955827	0.54878	0.677316	0.726604	0.886404	0.608374	0.770985	0.456225	0.768915	0.845366	0.717909	0.728825	0.50177	0.635619
SAM771445e92421	0.445733	0.793696	0.769241	0.612492	0.728582	0.602043	0.514906	0.712023	0.546831	0.821435	0.846944	0.414519	0.408627	0.68859	0.791792	0.539056	0.771759	0.39628	0.746601	0.775665	0.647603	0.693814	0.475326	0.732831
SAM59fda9035d1d	0.267057	0.663703	0.571813	0.650659	0.722216	0.582759	0.436008	0.741912	0.448045	0.822868	0.848431	0.409894	0.582261	0.690623	0.785286	0.552761	0.771729	0.407453	0.787435	0.79522	0.638024	0.650403	0.480528	0.611772
SAM727c0e92a2a7	0.802038	0.90826	0.866376	0.684354	0.721642	0.584027	0.472016	0.720124	0.765167	0.808985	0.953342	0.496417	0.431933	0.727722	0.849582	0.574864	0.772319	0.465005	0.792542	0.820074	0.664878	0.707405	0.503477	0.689912
SAM6f2a102a99df	0.50592	0.846791	0.802297	0.670219	0.731814	0.564857	0.448199	0.697785	0.565659	0.853485	0.912235	0.437716	0.603895	0.671363	0.815192	0.577899	0.76306	0.508039	0.795882	0.805691	0.6516	0.672413	0.48967	0.659897
SAMe56c96c51190	0.554149	0.866148	0.816279	0.71401	0.760938	0.605031	0.47648	0.746849	0.62854	0.878332	0.950641	0.442899	0.555833	0.757787	0.80823	0.605942	0.787492	0.50718	0.819221	0.878921	0.668514	0.72019	0.509339	0.671658
SAM2b672f4336c7	0.434489	0.779131	0.725255	0.626515	0.747206	0.612786	0.468332	0.69672	0.524067	0.834313	0.772748	0.37467	0.593034	0.722622	0.825711	0.522338	0.731777	0.367512	0.760216	0.709313	0.631248	0.62723	0.526521	0.662063
SAM1ab1b28d9f2b	0.434431	0.813864	0.656699	0.585056	0.726015	0.582339	0.435579	0.698468	0.494697	0.827853	0.679045	0.480885	0.456426	0.642435	0.782322	0.46046	0.715703	0.323038	0.734589	0.66105	0.5415	0.618156	0.449361	0.685258
SAM6662f5181f87	0.50573	0.780253	0.72801	0.63499	0.762138	0.583876	0.447643	0.701161	0.561736	0.849087	0.834058	0.362272	0.553865	0.710251	0.819957	0.545588	0.72548	0.350831	0.762202	0.738002	0.656545	0.646765	0.462409	0.661975
SAMe0c49ea0df5d	0.433108	0.73794	0.704377	0.664546	0.74893	0.634745	0.454385	0.698044	0.546773	0.84484	0.804152	0.528193	0.427369	0.682607	0.800403	0.558705	0.757088	0.371784	0.779443	0.753483	0.638421	0.639661	0.454253	0.684769
SAM18b9351e265a	0.594336	0.915371	0.823472	0.686251	0.749954	0.615731	0.541252	0.781383	0.631772	0.823809	0.909251	0.618438	0.415848	0.722981	0.810356	0.59407	0.785568	0.413252	0.78825	0.811515	0.674354	0.691519	0.515923	0.694497
SAM7fb7a13c096b	0.686252	0.802351	0.716957	0.618984	0.734631	0.622096	0.416785	0.713547	0.665534	0.839783	0.865064	0.412571	0.406339	0.703205	0.830854	0.553212	0.778755	0.385812	0.741251	0.748038	0.622151	0.672194	0.492488	0.670656
SAM87a8e18eb45b	0.176048	0.737944	0.655194	0.578102	0.746251	0.633616	0.424063	0.690259	0.400506	0.815552	0.693157	0.446688	0.411641	0.602805	0.800772	0.424965	0.686927	0.33371	0.722158	0.633692	0.589473	0.59938	0.441837	0.608528
SAM9725303dce0c	0.379136	0.785635	0.701919	0.601912	0.743297	0.620215	0.364893	0.688891	0.457467	0.833092	0.749698	0.540575	0.401813	0.62851	0.825379	0.485219	0.690147	0.382468	0.744333	0.647202	0.564419	0.628318	0.511774	0.664821
SAM6ff654a20f98	0.492702	0.780713	0.763735	0.629306	0.751213	0.600503	0.467771	0.71108	0.581488	0.838313	0.833191	0.432982	0.527518	0.726713	0.826847	0.539278	0.764763	0.343044	0.767108	0.743364	0.638382	0.676083	0.46544	0.650975
SAM65afda25b920	0.596128	0.82974	0.82195	0.637644	0.716647	0.561037	0.54556	0.736985	0.612703	0.816494	0.900599	0.213922	0.483417	0.782197	0.84132	0.61452	0.765371	0.438748	0.836139	0.833362	0.668333	0.687269	0.368	0.697297
SAMef0e3d2415fd	0.787418	0.863178	0.922496	0.686899	0.759736	0.626726	0.569875	0.763514	0.786046	0.839675	1	0.524039	0.618188	0.7735	0.829354	0.647074	0.802652	0.491476	0.792433	0.861921	0.73547	0.744233	0.533455	0.687793
SAM07a93a28f801	0.325215	0.812141	0.647887	0.611765	0.715566	0.587231	0.451523	0.76447	0.500182	0.826122	0.758013	0.362646	0.441362	0.663124	0.822187	0.499738	0.714995	0.377945	0.756495	0.698388	0.581377	0.610401	0.512207	0.671134
SAM94859b440b1d	0.270026	0.742989	0.673025	0.579865	0.743898	0.615936	0.377433	0.665574	0.401089	0.823408	0.667335	0.37159	0.386113	0.5454	0.823473	0.475899	0.704951	0.277263	0.706311	0.613756	0.551536	0.608623	0.478137	0.605594
SAM58e7832f4e7d	0	0.527922	0.553364	0.484519	0.73426	0.630749	0.280827	0.65134	0.300156	0.785723	0.555648	0.415658	0.421057	0.448752	0.779075	0.423925	0.664935	0.106223	0.711783	0.540479	0.559117	0.563798	0.440404	0.55835
SAMc57eadb2d82b	0.118505	0.694947	0.541363	0.561229	0.761695	0.613455	0.331817	0.700717	0.307216	0.811481	0.610608	0.447943	0.555513	0.496906	0.819548	0.44462	0.70183	0.139555	0.732812	0.593099	0.519152	0.532839	0.410242	0.599696
SAM5767dd75d142	0.446729	0.794779	0.701283	0.646064	0.718955	0.578852	0.374171	0.67589	0.543818	0.789392	0.799748	0.441326	0.492061	0.648992	0.80494	0.506736	0.755549	0.3649	0.754604	0.688602	0.591014	0.646524	0.418226	0.660649
SAMaabf4afe4213	0.528614	0.779523	0.726193	0.584287	0.713564	0.618507	0.343835	0.693236	0.541504	0.787573	0.760984	0.312097	0.508708	0.517982	0.781314	0.474513	0.72851	0.273058	0.72252	0.675812	0.57355	0.640988	0.432605	0.619019
SAMcc7a42d87e9c	0.419254	0.789208	0.727303	0.620973	0.726187	0.602305	0.393304	0.698031	0.516246	0.786351	0.727067	0.481998	0.491402	0.57988	0.818308	0.464669	0.726653	0.253275	0.70639	0.676115	0.608671	0.619748	0.437641	0.621243
SAMce39dd79b441	0.334717	0.803333	0.690926	0.635494	0.737734	0.580174	0.42417	0.709745	0.501234	0.861625	0.801911	0.247483	0.585519	0.556798	0.769064	0.531626	0.729306	0.469554	0.748478	0.753324	0.575927	0.60322	0.395666	0.643935
SAM75f12d1a55fc	0.670418	0.828775	0.780368	0.675746	0.734976	0.579277	0.479733	0.756007	0.653366	0.880678	0.919166	0.503508	0.41526	0.772589	0.823293	0.607076	0.782514	0.474975	0.786554	0.851387	0.669917	0.692864	0.529369	0.694329
SAM6964a6d7b967	0.319108	0.691648	0.569096	0.559079	0.727619	0.624075	0.344093	0.673594	0.383824	0.811593	0.653034	0.312071	0.353919	0.553677	0.80018	0.420993	0.698162	0.449957	0.758421	0.574155	0.553034	0.577983	0.471262	0.580309
SAM3b1066e5801b	0.851877	0.873193	0.84331	0.637769	0.723154	0.592685	0.531121	0.712631	0.868093	0.79795	0.906989	0.411914	0.581713	0.69261	0.848148	0.592674	0.749919	0.324123	0.773489	0.77699	0.663163	0.695283	0.436581	0.656863
SAMf20b827dca51	0.676053	0.869137	0.875932	0.699001	0.736672	0.593719	0.52373	0.767483	0.670341	0.86307	0.939545	0.401286	0.579405	0.843266	0.877553	0.617091	0.781192	0.504009	0.794598	0.828793	0.68449	0.720336	0.499896	0.730668
SAM6792d6e98068	0.155802	0.634071	0.615232	0.560229	0.735795	0.629773	0.357353	0.695752	0.405269	0.816086	0.622961	0.373496	0.555483	0.58102	0.812815	0.447997	0.676365	0.325512	0.732503	0.630132	0.563378	0.571867	0.451837	0.618545
SAM31d9176e11fb	0.45034	0.832481	0.780167	0.642679	0.711473	0.628724	0.436047	0.751821	0.560373	0.820474	0.836183	0.426919	0.45071	0.633986	0.78672	0.563779	0.74909	0.419785	0.762773	0.741339	0.623402	0.636977	0.462338	0.708587
SAM5cc2d9036053	0.245055	0.739447	0.668196	0.563583	0.754296	0.592084	0.576769	0.719283	0.481922	0.826151	0.78259	0.377797	0.608613	0.773284	0.819313	0.530381	0.740227	0.483591	0.763821	0.736856	0.590728	0.638368	0.4873	0.692116
SAMb8101c538753	0.429024	0.835074	0.76518	0.649759	0.735391	0.579127	0.40436	0.752737	0.575285	0.817934	0.880269	0.487018	0.555789	0.650011	0.739008	0.529366	0.72054	0.40716	0.77883	0.784003	0.651451	0.638209	0.440556	0.644673
SAM80c6183220e6	0.552789	0.878807	0.776076	0.65065	0.757796	0.636394	0.461314	0.717896	0.614402	0.842531	0.889687	0.422723	0.618057	0.668297	0.792424	0.569258	0.753293	0.524546	0.782673	0.776569	0.657362	0.670546	0.475046	0.704523
SAM572f19794c96	0.525024	0.850515	0.73984	0.655651	0.752874	0.637616	0.463087	0.757862	0.63076	0.834824	0.835279	0.623642	0.447665	0.694739	0.812081	0.534057	0.735569	0.397201	0.79346	0.776873	0.604302	0.652706	0.443487	0.669406
SAM1abf01dd4544	0.644674	0.880534	0.793611	0.613337	0.733708	0.603434	0.49744	0.692338	0.631899	0.84424	0.839064	0.515226	0.507396	0.761737	0.830663	0.559368	0.738831	0.47875	0.802888	0.705247	0.60776	0.676514	0.450174	0.6716
SAM1f83ebd6be9b	0.353384	0.781661	0.699932	0.496785	0.737946	0.590607	0.427586	0.677714	0.469664	0.782304	0.656417	0.37105	0.350667	0.561174	0.790805	0.433925	0.704997	0.254299	0.691725	0.546966	0.5457	0.588959	0.39733	0.69338
SAM1f66db567eb5	0.584291	0.872463	0.781605	0.647067	0.757614	0.585422	0.468606	0.734538	0.605675	0.867239	0.900238	0.43051	0.507702	0.733856	0.78958	0.598151	0.73831	0.522487	0.765824	0.814216	0.672406	0.673566	0.498084	0.671003
SAM6157c8f38b72	0.458205	0.775103	0.746527	0.60098	0.750831	0.593675	0.417222	0.69648	0.531484	0.836964	0.847312	0.30417	0.401424	0.704745	0.803567	0.54713	0.7869	0.351613	0.760214	0.734396	0.683017	0.670288	0.452157	0.663067
SAMe7e4f7c076a7	0.371073	0.845766	0.81829	0.696525	0.767633	0.648554	0.520446	0.770173	0.600976	0.857042	0.943907	0.479155	0.652308	0.689581	0.785977	0.605501	0.783839	0.634081	0.821882	0.850346	0.715015	0.687033	0.516666	0.675482
SAM4caabd64e7fd	0.316389	0.72295	0.700108	0.59317	0.735018	0.625209	0.389341	0.693318	0.475526	0.798428	0.709629	0.327576	0.474705	0.533639	0.757021	0.485698	0.697899	0.291887	0.720267	0.617971	0.558779	0.589315	0.441206	0.634927
SAMc6eff056c89a	0.682977	0.782825	0.793305	0.655536	0.724961	0.616112	0.443805	0.710649	0.639255	0.863874	0.867516	0.445765	0.523287	0.589256	0.779821	0.573681	0.73876	0.411497	0.745375	0.741225	0.611431	0.663011	0.433075	0.618478
SAM5cfa1699bdb7	0.394658	0.762657	0.684492	0.633416	0.718566	0.593569	0.356155	0.762553	0.515997	0.823379	0.805453	0.368282	0.670018	0.664411	0.834323	0.559988	0.782124	0.326873	0.753861	0.787321	0.637402	0.673776	0.486833	0.652359
SAMda4d892fddc8	0.607347	0.782107	0.794409	0.640149	0.71566	0.618672	0.435579	0.721482	0.632356	0.842146	0.858411	0.307992	0.426743	0.716629	0.832485	0.50779	0.763521	0.296424	0.791356	0.75544	0.634747	0.676879	0.470269	0.63586
SAM3a1c9632ff7b	0.247941	0.692761	0.641584	0.589094	0.759806	0.639144	0.333826	0.675319	0.376064	0.831856	0.696989	0.490239	0.400215	0.52044	0.816257	0.452309	0.718997	0.314095	0.723115	0.617755	0.580041	0.58308	0.447171	0.609062
SAM8b4b8b0f9e73	0.654334	0.774491	0.821377	0.658349	0.742969	0.588426	0.456864	0.697489	0.667754	0.869369	0.922067	0.419718	0.400582	0.730416	0.814751	0.588485	0.78893	0.452129	0.776563	0.805818	0.655456	0.719623	0.452398	0.653889
SAMe3d4266775a9	0.352789	0.746883	0.708283	0.583199	0.73073	0.646177	0.408086	0.702131	0.481341	0.802007	0.704192	0.351716	0.522364	0.607716	0.814166	0.514252	0.722417	0.300954	0.744627	0.656023	0.600548	0.623486	0.502285	0.639582
