# Supplementary material for: Cross-talk of RNA modification "writers" describes tumor stemness and microenvironment and guides personalized immunotherapy for gastric cancer
Source: Aging (Albany NY). 2023 Jun 14;15(12):5445–81. doi: 10.18632/aging.204802 (PMC10333070; doi:10.18632/aging.204802)
Supplement: Supplementary Table 20 [file aging-15-204802-s021.xlsx]

## Sheet: Sheet1
Supplementary Table 20. Analyzing the relative enrichment of biological pathways of patients in IMvigor210 cohort.
Patient ID	EMT1	EMT2	EMT3	Pan-F-TBRS	Angiogenesis	APM	CD8 T effector	p53 signaling pathway	Cell cycle	Cellular senescence	MAPK signaling pathway	mTOR signaling pathway	Notch signaling pathway	T cell receptor signaling pathway	TGF-beta signaling pathway	ECM receptor interaction	Rap1 signaling pathway	C-type lectin receptor signaling pathway	PD-L1 expression and PD-1 checkpoint	Immune activation
SAMc1b27bc16435	0.768002	0.618609	0.572192	0.772321	0.599849	0.906071	0.6322	0.728288	0.862979	0.766298	0.687564	0.679237	0.7389	0.722121	0.664279	0.684759	0.606001	0.741512	0.772874	0.674262
SAMf275eb859a39	0.768654	0.57949	0.549737	0.721465	0.566544	0.953696	0.584595	0.684182	0.800361	0.727824	0.691327	0.676401	0.74477	0.701605	0.648957	0.702282	0.599121	0.756677	0.76484	0.614835
SAM7f0d9cc7f001	0.841259	0.701804	0.790678	0.831313	0.693648	0.921745	0.520131	0.569739	0.791626	0.732511	0.720964	0.687313	0.74942	0.711501	0.67909	0.750678	0.648895	0.7723	0.742642	0.54326
SAM4305ab968b90	0.680261	0.545634	0.469923	0.685352	0.455309	0.895679	0.313972	0.708734	0.863057	0.755093	0.680463	0.67711	0.726531	0.702606	0.642049	0.64555	0.555269	0.721781	0.748781	0.252814
SAMcf018fee2acd	0.766097	0.575502	0.716643	0.725261	0.582639	0.907216	0.523547	0.627025	0.784321	0.714903	0.698548	0.688124	0.738293	0.715786	0.68082	0.734404	0.610741	0.748763	0.769148	0.544719
SAMb2f1d0e54ece	0.833586	0.755501	0.802814	0.877343	0.607961	0.974382	0.64558	0.655481	0.793862	0.752961	0.726972	0.695927	0.745694	0.730822	0.683825	0.782684	0.660533	0.791413	0.772724	0.704487
SAMcc4675f394a1	0.809694	0.653281	0.74736	0.763584	0.592366	0.902373	0.461585	0.589596	0.772805	0.707037	0.678348	0.665716	0.741204	0.696894	0.698412	0.749101	0.612564	0.738324	0.748766	0.472495
SAM49f9b2e57aa5	0.688687	0.622913	0.635396	0.758312	0.481855	0.863527	0.358229	0.713299	0.867336	0.76272	0.680145	0.689329	0.739335	0.690362	0.657403	0.718273	0.607537	0.743253	0.729723	0.385317
SAM2e7aa8fa0ab3	0.764358	0.680635	0.591731	0.795493	0.446068	0.921636	0.61982	0.643788	0.809965	0.724459	0.680235	0.665773	0.724732	0.715528	0.645012	0.702628	0.617278	0.74159	0.763363	0.694129
SAMdf3e42c8672a	0.800355	0.733879	0.718216	0.752131	0.44343	0.953091	0.724316	0.731457	0.889363	0.785778	0.698661	0.695788	0.732556	0.733821	0.653072	0.734587	0.621432	0.75491	0.77943	0.787362
SAMd027124354ce	0.867046	0.755257	0.813276	0.7664	0.530745	0.925902	0.475833	0.705417	0.868605	0.787751	0.694049	0.679019	0.734557	0.7284	0.704984	0.746851	0.610288	0.765087	0.7734	0.501976
SAM36d87392593b	0.807828	0.76546	0.690593	0.805061	0.497007	0.959068	0.59979	0.724381	0.8646	0.766596	0.686212	0.685094	0.728373	0.719513	0.673206	0.744484	0.620931	0.756414	0.762873	0.632825
SAM36a9225b0222	0.859443	0.744017	0.729229	0.846855	0.593106	0.96449	0.750738	0.677639	0.81975	0.7629	0.724425	0.687663	0.724347	0.738313	0.685599	0.779847	0.651562	0.789813	0.794453	0.822248
SAMe7bf6c015192	0.81247	0.705242	0.710316	0.792668	0.469708	0.959605	0.746834	0.675788	0.81161	0.743025	0.687409	0.685248	0.738868	0.735717	0.657498	0.745348	0.626874	0.762869	0.780565	0.803419
SAM6dd7ad1d797d	0.84931	0.787326	0.722302	0.862856	0.501491	0.986992	0.666393	0.660736	0.833077	0.761081	0.711944	0.676446	0.749535	0.721636	0.665828	0.770108	0.603712	0.779317	0.776276	0.718169
SAMc0d625a50eb8	0.87394	0.789646	0.764462	0.86718	0.617492	0.906332	0.38079	0.521154	0.718632	0.696304	0.731744	0.690882	0.735519	0.703893	0.707143	0.777713	0.666432	0.782208	0.737241	0.407491
SAM18039827e1b9	0.724602	0.548493	0.60991	0.713604	0.574614	0.881813	0.444807	0.680372	0.834602	0.75814	0.70103	0.690078	0.753213	0.698031	0.667903	0.69794	0.599285	0.748421	0.749254	0.458583
SAM681e4bf7cf85	0.777253	0.693369	0.655505	0.788982	0.53647	0.916379	0.549489	0.754489	0.853167	0.762404	0.673297	0.69534	0.718809	0.706558	0.675456	0.716579	0.579968	0.733298	0.765666	0.61673
SAMc692536a795a	0.821323	0.738597	0.713028	0.845744	0.618537	0.941729	0.626043	0.638872	0.806703	0.738732	0.713616	0.675415	0.736197	0.730328	0.688644	0.755923	0.623987	0.758612	0.767856	0.705761
SAM9a2cf3c06fb3	0.868727	0.695439	0.739256	0.812933	0.757954	0.9481	0.600085	0.710337	0.838363	0.765418	0.732203	0.691122	0.747613	0.727629	0.695088	0.75294	0.641414	0.779761	0.771511	0.653278
SAM557dde1b9f3e	0.821714	0.716855	0.748818	0.844617	0.656176	0.944555	0.525114	0.630604	0.79148	0.717566	0.715846	0.689343	0.725243	0.704362	0.697679	0.749729	0.625369	0.751401	0.733542	0.57419
SAM23aa15d4a0b0	0.784386	0.65991	0.690945	0.788836	0.473935	0.910665	0.415376	0.728651	0.846369	0.753471	0.684859	0.687386	0.735329	0.701091	0.665585	0.731447	0.608467	0.737994	0.735852	0.42292
SAM468a9e1dc821	0.767024	0.736443	0.652733	0.750435	0.472466	0.937971	0.311355	0.645337	0.81903	0.747685	0.685071	0.69352	0.735736	0.686202	0.620254	0.704301	0.619997	0.754123	0.745317	0.342702
SAM81b71522417a	0.739697	0.546077	0.54628	0.675134	0.479216	0.895343	0.301982	0.735305	0.8683	0.759149	0.679631	0.680293	0.740413	0.686387	0.667928	0.691236	0.571115	0.725143	0.745733	0.326946
SAM6cb230f208a8	0.771125	0.641215	0.637241	0.773184	0.533344	0.921054	0.422459	0.637106	0.78341	0.710998	0.687328	0.684449	0.748533	0.676167	0.681183	0.73067	0.59752	0.741243	0.715647	0.428637
SAM0684af734db1	0.711738	0.602388	0.605685	0.738296	0.460685	0.895697	0.366194	0.707964	0.857687	0.765538	0.678771	0.684558	0.715896	0.698521	0.66498	0.691802	0.58523	0.746494	0.75585	0.465177
SAMb963dda93cfd	0.821642	0.715506	0.768341	0.796557	0.493551	0.962619	0.473408	0.718573	0.877185	0.783909	0.706403	0.678201	0.727864	0.699338	0.657528	0.766177	0.618394	0.771145	0.745771	0.521826
SAMa9ca8536d2b1	0.871622	0.722541	0.794412	0.874033	0.551804	0.923131	0.586518	0.634111	0.793893	0.752313	0.721551	0.687958	0.722003	0.715666	0.71508	0.765	0.645694	0.794401	0.764808	0.629511
SAM9fb814c22bdb	0.868352	0.765464	0.781447	0.849625	0.523785	0.963566	0.680473	0.682818	0.804315	0.759502	0.728243	0.69398	0.723482	0.756985	0.677973	0.788831	0.656542	0.812391	0.794775	0.755976
SAMbcbc7957c264	0.77999	0.566906	0.601084	0.741462	0.513328	0.89301	0.404367	0.718798	0.842864	0.748306	0.691142	0.68961	0.735043	0.716858	0.665444	0.702596	0.60611	0.738842	0.763803	0.430856
SAM7fb6987514a4	0.859269	0.701756	0.797712	0.818407	0.645915	0.961891	0.83279	0.718016	0.854808	0.772398	0.714807	0.696006	0.72616	0.762375	0.693234	0.758282	0.630908	0.790439	0.810272	0.8983
SAM63405b04ab2d	0.88773	0.824973	0.698133	0.83888	0.607292	0.968159	0.678797	0.643043	0.813893	0.752449	0.704408	0.667397	0.731722	0.724797	0.666291	0.755099	0.634798	0.785787	0.773305	0.753608
SAM18bc1078bc15	0.726152	0.593153	0.670105	0.73094	0.431322	0.927112	0.616376	0.72782	0.8472	0.768094	0.679114	0.684514	0.725231	0.722598	0.655405	0.683412	0.617936	0.767107	0.779852	0.680683
SAM7d2dfba6cd84	0.8277	0.709242	0.82405	0.807351	0.623412	0.970397	0.605002	0.585558	0.738527	0.704239	0.713114	0.685038	0.754397	0.747383	0.679109	0.769014	0.663949	0.782313	0.771303	0.633754
SAMd1bd63734394	0.746659	0.48628	0.637204	0.666758	0.398516	0.989083	0.661334	0.714905	0.85516	0.764794	0.67033	0.674456	0.734147	0.746136	0.620147	0.672463	0.586794	0.762089	0.801625	0.724884
SAMe9ae8beb82fa	0.835102	0.769854	0.706881	0.820029	0.539242	0.940569	0.47955	0.682544	0.799151	0.738959	0.692569	0.686974	0.727186	0.710913	0.669352	0.767482	0.628825	0.768119	0.763039	0.500885
SAMb0a83e5fbde9	0.767608	0.610564	0.662698	0.750666	0.478574	0.884997	0.41755	0.62188	0.784616	0.707559	0.696137	0.686143	0.741476	0.719922	0.657286	0.727131	0.621311	0.740143	0.771749	0.43093
SAMba7176afe070	0.759148	0.52581	0.535644	0.688698	0.47209	0.8805	0.293969	0.612362	0.757577	0.705834	0.681404	0.692737	0.753432	0.696783	0.633014	0.66253	0.599322	0.719133	0.749275	0.303609
SAMae1690469964	0.737435	0.601111	0.537838	0.709764	0.485494	0.945957	0.504978	0.691084	0.828346	0.733872	0.668022	0.680533	0.747015	0.708711	0.635779	0.681847	0.577154	0.716247	0.742214	0.539543
SAMbe83eae4026e	0.781248	0.679728	0.628324	0.789229	0.439406	0.907303	0.553584	0.75367	0.849478	0.75626	0.682332	0.702747	0.731666	0.732865	0.671422	0.716881	0.605598	0.760437	0.764633	0.585289
SAMe5bc41772bc9	0.803309	0.708029	0.739154	0.807493	0.57507	0.927868	0.370525	0.665339	0.823635	0.749739	0.695681	0.684486	0.738284	0.696006	0.684834	0.759608	0.635763	0.769745	0.740687	0.380203
SAM23095936e611	0.756402	0.641785	0.625315	0.765977	0.514594	0.869205	0.384846	0.736798	0.867335	0.767688	0.730039	0.685915	0.738405	0.712583	0.691177	0.709111	0.620328	0.739971	0.759477	0.395855
SAM7114d99032ec	0.768779	0.676935	0.630508	0.844693	0.519191	0.871977	0.386521	0.656394	0.798145	0.720519	0.68179	0.674815	0.738806	0.696399	0.643819	0.718183	0.614335	0.728603	0.729251	0.433387
SAMd215b503f99a	0.864305	0.833158	0.820879	0.883462	0.520249	0.93887	0.419385	0.602809	0.771862	0.727351	0.713956	0.674443	0.745548	0.701858	0.701889	0.774741	0.638928	0.760838	0.744731	0.43875
SAMdb3f50c9129c	0.780592	0.651224	0.776773	0.771935	0.510064	0.888037	0.43152	0.684447	0.840043	0.76422	0.698986	0.683341	0.729565	0.717636	0.682739	0.707003	0.602402	0.756332	0.76734	0.45545
SAMbf1a3ae828e6	0.844775	0.727658	0.753098	0.858661	0.566537	0.894755	0.567149	0.680653	0.835834	0.761423	0.700391	0.687862	0.730881	0.721868	0.673359	0.757208	0.628153	0.764235	0.768672	0.622632
SAM52e3fa3ad574	0.751031	0.577548	0.679127	0.72544	0.477668	0.974696	0.714283	0.673871	0.812293	0.741448	0.694831	0.695276	0.741875	0.76651	0.629273	0.653635	0.619151	0.762323	0.801105	0.775961
SAMd4c0837b0997	0.806084	0.656812	0.681277	0.758034	0.41907	0.915213	0.566823	0.726307	0.860832	0.775359	0.715856	0.681436	0.726387	0.733332	0.670406	0.731001	0.633821	0.766207	0.787621	0.624941
SAM9cafb905b36a	0.78069	0.65524	0.705639	0.757812	0.483543	0.977582	0.759513	0.690218	0.857979	0.779372	0.705755	0.682679	0.728685	0.750354	0.618317	0.699393	0.635533	0.80127	0.795863	0.832334
SAM032c642382a7	0.706134	0.635901	0.652332	0.748811	0.539752	0.971259	0.749673	0.699471	0.891263	0.791386	0.681436	0.683886	0.715465	0.75789	0.650587	0.692613	0.624468	0.785	0.807797	0.815832
SAMb419a8fcbfcd	0.739466	0.628287	0.720472	0.71775	0.36235	0.83651	0.446608	0.708585	0.899454	0.787515	0.675687	0.674991	0.713589	0.731107	0.683631	0.717629	0.584988	0.74553	0.77167	0.505845
SAM8884fe446d20	0.875905	0.77657	0.829925	0.829636	0.581309	0.988791	0.819112	0.698779	0.864839	0.776141	0.706086	0.693816	0.735972	0.741018	0.647888	0.761036	0.62556	0.784308	0.792326	0.900376
SAM2070b416069c	0.754073	0.592725	0.656348	0.738114	0.435144	0.931052	0.427763	0.63799	0.797821	0.715868	0.675952	0.694195	0.752995	0.688251	0.643577	0.711645	0.610093	0.729459	0.728166	0.474958
SAM0ce9c983b20f	0.83359	0.728871	0.747617	0.828917	0.586979	0.945291	0.617724	0.677698	0.83516	0.750089	0.704862	0.682348	0.743469	0.725114	0.687346	0.759428	0.623035	0.758348	0.774097	0.653722
SAMa1e62d323e1d	0.813317	0.704586	0.650041	0.820021	0.497656	0.952029	0.599135	0.694858	0.837529	0.75576	0.69515	0.670585	0.737706	0.712122	0.689098	0.71852	0.607544	0.75245	0.767346	0.67064
SAM61baf919bb01	0.833373	0.76593	0.707995	0.840431	0.558127	0.953448	0.667608	0.603873	0.801265	0.730835	0.700724	0.686151	0.746339	0.723657	0.687245	0.758463	0.625411	0.756764	0.758611	0.75176
SAM97a00e0929fb	0.714033	0.572789	0.664231	0.746202	0.50071	0.891544	0.625955	0.702211	0.876495	0.775635	0.685129	0.690616	0.724554	0.727844	0.626899	0.676609	0.590281	0.748947	0.780444	0.67844
SAM2f228939632f	0.80356	0.738475	0.823359	0.83761	0.483365	0.955223	0.581175	0.647687	0.828749	0.768038	0.708626	0.674695	0.744571	0.719663	0.701491	0.73955	0.657219	0.770756	0.769364	0.650838
SAM9539a4f19ebc	0.776929	0.660343	0.635953	0.779574	0.564165	0.886227	0.327355	0.697136	0.843202	0.749676	0.701483	0.689195	0.746207	0.68589	0.682358	0.732041	0.614471	0.730523	0.737504	0.349661
SAM36851bc8b9ae	0.740213	0.600163	0.649992	0.774668	0.473463	0.914869	0.553139	0.682139	0.802708	0.726554	0.678714	0.688541	0.749311	0.705063	0.650456	0.730656	0.611009	0.726955	0.753214	0.575806
SAM297c0301e861	0.849281	0.772835	0.816986	0.872758	0.534873	0.948623	0.625955	0.712428	0.858125	0.789902	0.715642	0.694045	0.720282	0.756128	0.683478	0.771317	0.628478	0.797679	0.791565	0.675099
SAM1fa6bcb7fc48	0.760008	0.612681	0.624786	0.75787	0.459713	0.960882	0.610844	0.705157	0.842986	0.746843	0.710053	0.681963	0.728253	0.72039	0.665803	0.697065	0.628247	0.740152	0.776517	0.674683
SAM075e037d95bc	0.698052	0.542668	0.518636	0.716302	0.46188	0.876257	0.412894	0.671257	0.814292	0.712021	0.674429	0.672527	0.738849	0.70848	0.634688	0.647228	0.570756	0.725554	0.753829	0.500175
SAM6d2ae0c39b96	0.730566	0.588469	0.580922	0.711287	0.582183	0.953025	0.511927	0.662912	0.81229	0.720284	0.66637	0.69065	0.756965	0.702273	0.637666	0.697236	0.57042	0.718762	0.735544	0.554503
SAMcabb6d58ff55	0.788338	0.722974	0.702672	0.8086	0.539872	0.96242	0.643237	0.693756	0.83546	0.75895	0.715393	0.693247	0.748252	0.75577	0.665353	0.756713	0.639324	0.766861	0.800516	0.723981
SAM716f54e468f4	0.816078	0.704358	0.673772	0.80903	0.478149	0.940095	0.610592	0.66672	0.827086	0.763448	0.693972	0.681883	0.728195	0.74282	0.680843	0.742153	0.618672	0.771756	0.77855	0.67818
SAMeff2ce356ccb	0.776895	0.59333	0.56712	0.743092	0.502445	0.904322	0.407173	0.743748	0.856559	0.774149	0.686609	0.677753	0.732098	0.725922	0.652129	0.661293	0.57833	0.749413	0.785202	0.437461
SAM110501d0eedb	0.765643	0.603073	0.618523	0.735917	0.502201	0.949614	0.525586	0.662203	0.801354	0.725413	0.677247	0.672428	0.720792	0.714271	0.642525	0.689489	0.601037	0.735189	0.760315	0.591489
SAM2e9ac0b1b250	0.781208	0.66186	0.64622	0.755735	0.576684	0.967148	0.677174	0.677431	0.857964	0.770319	0.699895	0.679154	0.708774	0.73216	0.639816	0.72866	0.584268	0.752689	0.775923	0.738802
SAMc0ef41aa6c8b	0.758508	0.609472	0.654074	0.695464	0.542646	0.90505	0.32636	0.603852	0.751693	0.70505	0.685168	0.684936	0.744724	0.719034	0.676466	0.711017	0.60341	0.720499	0.76075	0.348609
SAMd636e3461955	0.897865	0.841628	0.799557	0.869914	0.750561	0.929396	0.538308	0.585076	0.769759	0.731375	0.728516	0.703804	0.738633	0.730258	0.701592	0.777842	0.655165	0.811419	0.775067	0.568939
SAMe712352fb82a	0.712806	0.513198	0.641395	0.701824	0.38124	0.891098	0.487575	0.754283	0.872033	0.786284	0.674027	0.687692	0.706958	0.737707	0.647234	0.65315	0.592691	0.751216	0.79292	0.534756
SAM30b5c6c54cf7	0.76979	0.64479	0.68588	0.752973	0.475262	0.949558	0.568674	0.656959	0.849718	0.771132	0.689924	0.681753	0.731155	0.729815	0.636655	0.721411	0.618389	0.761534	0.769294	0.614478
SAMd98bac0a070f	0.83334	0.682149	0.760863	0.804669	0.686397	0.938989	0.462342	0.654135	0.800054	0.718123	0.705173	0.686247	0.741611	0.703763	0.680916	0.750613	0.61155	0.748637	0.756256	0.491467
SAM8e8ef2368dfa	0.847173	0.734136	0.803175	0.858009	0.51361	0.935106	0.394192	0.531535	0.711167	0.691808	0.716069	0.689759	0.740852	0.713867	0.69608	0.782077	0.665176	0.790429	0.748205	0.408422
SAM08cce2fa88f2	0.783769	0.601543	0.546324	0.758011	0.551018	0.861665	0.286542	0.66174	0.796753	0.713837	0.678602	0.687352	0.728133	0.683841	0.64502	0.690422	0.557528	0.744148	0.720616	0.280785
SAMb4c7a001537d	0.688937	0.589974	0.563007	0.740915	0.510807	0.920492	0.615	0.670675	0.851661	0.755935	0.679011	0.688261	0.72487	0.715391	0.651453	0.668006	0.589153	0.739295	0.764837	0.68509
SAMfd947610629d	0.846826	0.768439	0.815613	0.868205	0.664063	0.897548	0.373708	0.61924	0.765019	0.719949	0.712062	0.697475	0.741567	0.690544	0.684696	0.77435	0.639409	0.759999	0.734106	0.402594
SAM943df5cf15df	0.835632	0.818975	0.736464	0.809463	0.440724	0.947494	0.562345	0.686108	0.840352	0.7552	0.68761	0.677046	0.726684	0.712271	0.661377	0.742656	0.619717	0.753262	0.764255	0.584412
SAM31f41dd0d6ca	0.842504	0.723484	0.733748	0.809847	0.57995	0.94337	0.586265	0.630872	0.80867	0.744791	0.696596	0.694304	0.748495	0.727077	0.68668	0.765978	0.634965	0.769825	0.77586	0.62851
SAMb3c02294aba7	0.732017	0.577002	0.611955	0.762875	0.415129	0.975133	0.399483	0.784924	0.880409	0.798287	0.701933	0.702424	0.709926	0.740131	0.634991	0.725763	0.612902	0.786139	0.769812	0.411062
SAM39eb94fa504d	0.788038	0.67001	0.682328	0.781298	0.577232	0.972855	0.614757	0.643237	0.846983	0.749762	0.693131	0.687923	0.741513	0.731901	0.670593	0.744	0.612011	0.759132	0.776548	0.679028
SAM62fb1388c871	0.752202	0.659594	0.663423	0.780055	0.559468	0.90684	0.468579	0.756096	0.880237	0.776606	0.66431	0.67297	0.736237	0.716023	0.651675	0.6948	0.586794	0.726862	0.758749	0.503058
SAMc0da5d48686d	0.690933	0.673541	0.599018	0.856578	0.481201	0.892179	0.391676	0.70639	0.863569	0.780877	0.690562	0.694394	0.720243	0.756849	0.644409	0.729454	0.634587	0.771955	0.796816	0.406343
SAMe7bcab05402e	0.863249	0.780396	0.739797	0.845278	0.613204	0.902964	0.429879	0.573728	0.756507	0.716539	0.716147	0.69137	0.737053	0.718722	0.706131	0.75335	0.649624	0.786828	0.762293	0.432731
SAM2570ff4aae6e	0.853488	0.748337	0.716144	0.803616	0.513275	0.964522	0.698646	0.653848	0.816904	0.746824	0.690884	0.692427	0.724598	0.714558	0.67687	0.753061	0.626261	0.774127	0.769806	0.765117
SAM2dc3f04e45e9	0.734135	0.596615	0.757479	0.731012	0.444669	0.973186	0.700329	0.661994	0.8497	0.768867	0.672746	0.658708	0.697107	0.742348	0.64703	0.739241	0.634078	0.756375	0.748234	0.784019
SAM4501e41e4751	0.83694	0.712505	0.758913	0.78835	0.463547	0.939839	0.563718	0.656223	0.816833	0.75516	0.708477	0.686534	0.730679	0.73697	0.679733	0.761491	0.647877	0.777154	0.775496	0.611669
SAM5b57e47fdcb3	0.793944	0.660287	0.617115	0.756872	0.549213	0.898994	0.567749	0.705446	0.835458	0.741898	0.681911	0.661224	0.744691	0.708189	0.657983	0.696358	0.61261	0.732084	0.762142	0.613741
SAMae4da274eded	0.758647	0.643339	0.63546	0.7706	0.530875	0.960541	0.545884	0.697383	0.843621	0.759934	0.693579	0.678406	0.760018	0.718816	0.674306	0.727004	0.613867	0.738652	0.769034	0.582074
SAMd35318127278	0.759029	0.550458	0.622222	0.67394	0.462069	0.916726	0.705139	0.740725	0.863493	0.767068	0.671128	0.683443	0.73046	0.720341	0.631411	0.637851	0.585746	0.723176	0.778259	0.765559
SAMa913c6139ec8	0.808189	0.65624	0.73488	0.828521	0.525409	0.949595	0.666072	0.610992	0.801784	0.748542	0.719361	0.688578	0.729071	0.740506	0.656135	0.734392	0.638959	0.784359	0.781943	0.697849
SAM75142fcab9df	0.827956	0.699675	0.757012	0.779842	0.522405	0.924366	0.60519	0.639895	0.797204	0.732651	0.690758	0.686302	0.725745	0.726177	0.663879	0.754442	0.634205	0.772614	0.774192	0.647172
SAMd697ba701077	0.801727	0.704235	0.672444	0.776441	0.631811	0.972505	0.601147	0.68321	0.799354	0.727801	0.694979	0.679095	0.759491	0.712356	0.658845	0.72345	0.618595	0.737536	0.759888	0.647584
SAM166a419a4e5a	0.883156	0.817571	0.805942	0.86665	0.664085	0.916857	0.640746	0.572997	0.762137	0.721618	0.726676	0.688968	0.726543	0.723518	0.694149	0.782437	0.648223	0.782688	0.77336	0.681629
SAM025b45c27e05	0.870052	0.787923	0.761928	0.864028	0.576966	0.897636	0.332742	0.629074	0.793691	0.742919	0.716628	0.684305	0.734491	0.717434	0.686953	0.777028	0.65719	0.776685	0.763806	0.368027
SAMe07c4560772d	0.780544	0.618712	0.547199	0.717288	0.541751	0.862656	0.284632	0.708061	0.857078	0.754507	0.68377	0.68456	0.740077	0.702831	0.659249	0.653125	0.566127	0.720752	0.742656	0.291004
SAM560f23d6a3ad	0.735093	0.572448	0.745642	0.713822	0.484016	0.984178	0.825766	0.679257	0.839258	0.772292	0.693097	0.678001	0.710288	0.743557	0.621315	0.714513	0.619564	0.783887	0.80508	0.889075
SAM52500cabdd36	0.768036	0.606769	0.622961	0.758259	0.541008	0.870792	0.492357	0.69618	0.860536	0.768833	0.680096	0.684028	0.73546	0.718561	0.650112	0.690447	0.598002	0.750995	0.755314	0.539647
SAM14df63a65411	0.762127	0.636594	0.65268	0.74346	0.518723	0.950879	0.478608	0.70827	0.831775	0.750332	0.689036	0.698536	0.73774	0.694285	0.667724	0.735528	0.59016	0.732989	0.748655	0.523438
SAMf3a9bce50099	0.823373	0.704446	0.734048	0.830022	0.551719	0.93391	0.589141	0.644154	0.805638	0.755578	0.704375	0.698433	0.743707	0.744217	0.688387	0.744967	0.64021	0.776026	0.778892	0.62384
SAMffa5c7cad0e5	0.884392	0.7679	0.836175	0.862035	0.667324	0.927314	0.603647	0.674224	0.797342	0.745324	0.718047	0.691988	0.740323	0.727907	0.672395	0.775691	0.656388	0.777745	0.761756	0.651699
SAMdab9ca8fb5de	0.829749	0.743901	0.685323	0.832637	0.491479	0.935314	0.500906	0.674393	0.824948	0.75023	0.704635	0.679287	0.741715	0.706586	0.700694	0.747749	0.624799	0.757413	0.754347	0.554858
SAM34430ef08e5b	0.869264	0.759121	0.770646	0.818	0.613342	0.913032	0.531421	0.628521	0.814273	0.746643	0.688068	0.677979	0.740187	0.717124	0.653578	0.739572	0.621577	0.77383	0.747122	0.57229
SAM4b0175e8db6e	0.817426	0.680551	0.741446	0.785237	0.517711	0.913467	0.478485	0.65321	0.798016	0.720843	0.703806	0.674022	0.739054	0.722696	0.679186	0.756464	0.644118	0.743793	0.760592	0.493724
SAMf28c01545593	0.757144	0.523384	0.569662	0.682232	0.435017	0.857966	0.373617	0.667384	0.80811	0.719507	0.670967	0.671691	0.746938	0.707405	0.666659	0.66499	0.572892	0.718413	0.743371	0.395577
SAMaec7380f9ab0	0.683421	0.589127	0.690783	0.701875	0.466192	0.918922	0.520866	0.708657	0.916866	0.792495	0.671428	0.716012	0.711584	0.767126	0.610953	0.670976	0.609927	0.754125	0.808125	0.587667
SAMe94c30c30616	0.844601	0.75423	0.752923	0.847478	0.580532	0.953195	0.600845	0.6769	0.828316	0.749661	0.699174	0.66924	0.736048	0.715462	0.69207	0.74715	0.62006	0.752593	0.758776	0.645076
SAM54e58f1b0230	0.706017	0.534797	0.48532	0.77605	0.468066	0.842119	0.25765	0.748656	0.874959	0.782803	0.69507	0.673907	0.716633	0.701806	0.648645	0.699631	0.560852	0.727415	0.740809	0.281979
SAM5e3bae090b8c	0.765827	0.644219	0.67476	0.768833	0.471869	0.944423	0.573027	0.693379	0.836183	0.76282	0.684518	0.681728	0.707585	0.711683	0.647753	0.715678	0.59387	0.761069	0.768917	0.637174
SAM3cb94b0d5297	0.728343	0.661995	0.62586	0.747334	0.526381	0.928791	0.601888	0.62549	0.791719	0.726444	0.682028	0.675463	0.724754	0.726676	0.651689	0.713962	0.609085	0.758513	0.775751	0.654971
SAM61b9d4d84c64	0.697454	0.515329	0.566569	0.703752	0.471243	0.948635	0.587806	0.701853	0.84434	0.754262	0.694269	0.67881	0.727004	0.7302	0.663456	0.664369	0.600054	0.742296	0.774393	0.64974
SAMcb132b0cdd2c	0.777117	0.61766	0.65994	0.76491	0.530459	0.942683	0.621833	0.666305	0.843628	0.759796	0.689413	0.697257	0.736306	0.758616	0.652809	0.713076	0.620933	0.753025	0.780281	0.697053
SAMe97af0feefdf	0.795728	0.667459	0.696251	0.788625	0.564978	0.9259	0.494063	0.699584	0.843853	0.761093	0.704352	0.68355	0.750763	0.716424	0.677849	0.740685	0.62712	0.748458	0.766392	0.501429
SAMee3844cc0b9f	0.869884	0.770368	0.754105	0.845273	0.654394	0.958109	0.676784	0.614858	0.771891	0.721553	0.707044	0.690518	0.748223	0.71962	0.702173	0.769404	0.643058	0.772023	0.76323	0.756637
SAMdcae54fcd7fa	0.807586	0.713827	0.744841	0.815068	0.610694	0.931345	0.473576	0.648644	0.809296	0.746773	0.703038	0.696138	0.738112	0.699037	0.668747	0.748114	0.63659	0.771533	0.746723	0.480834
SAMdad5c29dc105	0.778552	0.66592	0.57037	0.769649	0.506675	0.902634	0.516731	0.711003	0.858318	0.754073	0.684003	0.678655	0.732019	0.711669	0.692122	0.703304	0.584962	0.732276	0.753501	0.589288
SAMa424c75831b4	0.796652	0.692776	0.60807	0.776032	0.407435	0.966391	0.671968	0.726331	0.863844	0.771174	0.667915	0.67769	0.715879	0.726149	0.673153	0.719263	0.591702	0.747086	0.7733	0.73605
SAM28687037e4ff	0.864843	0.741356	0.773454	0.832906	0.516228	0.983634	0.782635	0.695137	0.861202	0.774421	0.701715	0.682384	0.728829	0.731245	0.6872	0.763379	0.63554	0.775885	0.777894	0.857848
SAMe50d15fde368	0.685106	0.518274	0.516533	0.688496	0.46716	0.872828	0.354957	0.713614	0.84873	0.756692	0.671123	0.673347	0.73228	0.700807	0.669203	0.668373	0.5681	0.728934	0.75493	0.3764
SAM45c8e6412c66	0.814142	0.71721	0.725722	0.762115	0.439359	0.992701	0.762176	0.745356	0.886396	0.784374	0.689264	0.669321	0.729275	0.730399	0.651483	0.727109	0.620668	0.763915	0.781293	0.834043
SAM8533e5e261d6	0.730275	0.538229	0.60254	0.714474	0.52499	0.894703	0.324604	0.655001	0.776319	0.708568	0.677098	0.685905	0.753119	0.695037	0.665581	0.699556	0.577541	0.719104	0.734078	0.347572
SAMaaf505c36f93	0.790373	0.669241	0.643315	0.795297	0.515077	0.882501	0.461025	0.64989	0.829924	0.74221	0.700162	0.666984	0.734064	0.707351	0.694247	0.714795	0.611557	0.733275	0.744729	0.508543
SAM73663ee4a96e	0.796053	0.644766	0.611448	0.819903	0.464821	0.971678	0.631493	0.638401	0.795492	0.731946	0.691633	0.681351	0.746947	0.734596	0.663882	0.719522	0.610105	0.741699	0.76515	0.6977
SAM0bdb3428bd13	0.866181	0.768252	0.759666	0.845915	0.682739	0.914244	0.414737	0.610199	0.772018	0.716753	0.71154	0.697054	0.745479	0.686416	0.691729	0.756604	0.624871	0.761505	0.728164	0.447643
SAM3330c03fdf00	0.830711	0.569212	0.760551	0.742477	0.602623	0.965101	0.758017	0.630158	0.805386	0.752254	0.703642	0.699277	0.727553	0.769283	0.655293	0.699395	0.648767	0.777774	0.808048	0.82223
SAM0a7c2091dd56	0.834597	0.792795	0.766563	0.82443	0.47922	0.949718	0.568418	0.6439	0.84299	0.764384	0.706967	0.691301	0.722628	0.723927	0.66843	0.748981	0.627656	0.772156	0.767552	0.643463
SAM7bff231634e9	0.725275	0.544562	0.516396	0.692691	0.484237	0.97353	0.711659	0.722173	0.87949	0.784402	0.687724	0.675228	0.757443	0.744709	0.591412	0.655077	0.586745	0.755096	0.807894	0.783575
SAM5d1dfd5207f5	0.752553	0.572269	0.557078	0.719545	0.572197	0.913612	0.286095	0.654693	0.820298	0.732132	0.680355	0.683515	0.735548	0.688225	0.654421	0.692116	0.579442	0.726506	0.743774	0.300651
SAMeb587a68006b	0.86246	0.757134	0.804922	0.850695	0.563021	0.904582	0.46446	0.661248	0.823752	0.763266	0.701546	0.679537	0.737665	0.712904	0.701638	0.762158	0.62536	0.776173	0.769679	0.519223
SAM99a46b9eec27	0.837045	0.675874	0.764463	0.808788	0.518474	0.961342	0.624473	0.622632	0.781722	0.732906	0.712398	0.681615	0.743388	0.740294	0.687478	0.768062	0.659455	0.773991	0.783427	0.662707
SAM1ac4e3dee297	0.72926	0.558932	0.49877	0.73552	0.426408	0.895713	0.285945	0.647307	0.817037	0.73033	0.692253	0.682441	0.741646	0.689086	0.661032	0.690738	0.589891	0.73466	0.735885	0.294013
SAM553c3c35b847	0.845828	0.703721	0.81857	0.809583	0.584098	0.972379	0.822367	0.639088	0.802503	0.744525	0.716278	0.696726	0.739293	0.762719	0.669295	0.764183	0.657321	0.790169	0.805071	0.876021
SAM3e04eb914f3d	0.837658	0.711741	0.754864	0.812791	0.562187	0.958778	0.72297	0.680817	0.819524	0.74599	0.677578	0.677624	0.744006	0.727493	0.673264	0.750643	0.62521	0.752477	0.77742	0.801835
SAMc2a1820d4e6b	0.834982	0.686962	0.682235	0.826925	0.58684	0.961108	0.71481	0.628812	0.79149	0.727027	0.718557	0.688181	0.742275	0.736443	0.688764	0.742396	0.636971	0.776446	0.786293	0.790824
SAM822b226466a1	0.721101	0.580494	0.531165	0.717932	0.518448	0.920034	0.349797	0.664804	0.805767	0.710053	0.662122	0.679604	0.750245	0.710273	0.645482	0.669023	0.556384	0.712672	0.740134	0.361483
SAMabc151b01ea3	0.771159	0.614311	0.690274	0.751315	0.58356	0.921538	0.409777	0.650239	0.811837	0.740895	0.681417	0.672078	0.738586	0.691243	0.660654	0.732419	0.609307	0.737587	0.735968	0.428433
SAMe1eb5d988760	0.839631	0.707854	0.744673	0.838927	0.51509	0.954209	0.70428	0.713289	0.850915	0.773247	0.696841	0.684553	0.721949	0.735109	0.690581	0.755925	0.622746	0.764745	0.780628	0.782032
SAMe3210d3632b4	0.859209	0.774851	0.760544	0.840262	0.512771	0.979575	0.679211	0.709231	0.862373	0.777874	0.708332	0.690515	0.740968	0.723638	0.672707	0.765355	0.632706	0.786777	0.779416	0.755153
SAMb15ad09d6e24	0.854818	0.731817	0.746883	0.828124	0.616244	0.966786	0.794872	0.675358	0.845812	0.780962	0.715891	0.696483	0.724608	0.755354	0.663791	0.758606	0.649156	0.785303	0.800828	0.865484
SAM7893196e0e89	0.794603	0.68171	0.691655	0.771333	0.461268	0.906861	0.440828	0.743385	0.870789	0.770979	0.692076	0.678904	0.727586	0.706016	0.661645	0.723446	0.614688	0.735682	0.757103	0.464541
SAM961d04c42bd9	0.768042	0.671431	0.647609	0.798564	0.469871	0.928016	0.527365	0.718355	0.841985	0.754576	0.678815	0.680921	0.74912	0.703243	0.67878	0.721606	0.5868	0.739567	0.758111	0.559729
SAMb0d11db9aa79	0.80897	0.563677	0.686502	0.717485	0.440288	0.981374	0.74065	0.685781	0.824956	0.733266	0.666983	0.681384	0.734487	0.715837	0.653079	0.706018	0.574955	0.723638	0.760315	0.814966
SAM19fec8f3b3bd	0.848351	0.76363	0.760677	0.830481	0.421356	0.940885	0.42531	0.663696	0.838014	0.760204	0.709793	0.688689	0.738297	0.725887	0.657058	0.766984	0.629579	0.772375	0.757951	0.461594
SAM6083aac8db99	0.710696	0.617134	0.634389	0.756088	0.546749	0.93772	0.669397	0.715793	0.866412	0.773992	0.697915	0.696935	0.721511	0.730454	0.647097	0.692573	0.59974	0.748152	0.775816	0.746273
SAMa90d73f8d891	0.814265	0.680899	0.726367	0.762844	0.584061	0.936413	0.265773	0.680835	0.82605	0.745619	0.701616	0.685651	0.73173	0.692922	0.651509	0.729782	0.618438	0.750494	0.738812	0.348282
SAM415f36ad349e	0.805747	0.72472	0.798084	0.826815	0.493222	0.922824	0.417653	0.722764	0.844028	0.759788	0.710818	0.681977	0.725672	0.696854	0.672031	0.758322	0.619469	0.782844	0.742584	0.447291
SAM7c67b05aa109	0.691327	0.537723	0.53306	0.692241	0.501973	0.864713	0.26867	0.687129	0.856853	0.755683	0.688215	0.687534	0.736515	0.688389	0.649192	0.676159	0.573126	0.701665	0.741751	0.282852
SAMad83c9c53537	0.822495	0.729618	0.728743	0.814842	0.519459	0.935662	0.470502	0.670818	0.81573	0.752836	0.703689	0.684604	0.748839	0.730364	0.682367	0.75869	0.651155	0.760011	0.784014	0.496083
SAM3e8baff50d7a	0.679439	0.526376	0.661942	0.69334	0.442674	0.946412	0.42165	0.692732	0.865255	0.773697	0.679327	0.686084	0.737755	0.737954	0.63334	0.705372	0.583826	0.752339	0.76023	0.467268
SAM3ee5dcd894f0	0.780866	0.739508	0.627184	0.813257	0.547311	0.944571	0.487296	0.732666	0.816331	0.737274	0.681194	0.694615	0.748667	0.658229	0.652245	0.758668	0.586323	0.735326	0.722847	0.495351
SAM8a1b0e02ee42	0.659995	0.517494	0.533517	0.701657	0.48742	0.926896	0.435916	0.73783	0.870701	0.770842	0.67115	0.681957	0.733313	0.693522	0.660344	0.667961	0.583054	0.741566	0.765087	0.473106
SAMd7d57ee3a863	0.746844	0.719596	0.726682	0.835646	0.484904	0.992078	0.781007	0.689163	0.874804	0.787443	0.697163	0.680582	0.71408	0.73759	0.67273	0.751239	0.625869	0.772045	0.776604	0.857072
SAMeb29625f76a5	0.753715	0.60381	0.605991	0.76209	0.521026	0.949894	0.536735	0.662747	0.834047	0.73985	0.713377	0.690382	0.746608	0.715971	0.677158	0.712294	0.615924	0.75826	0.7613	0.578094
SAM563d6233dfa2	0.776632	0.606533	0.693229	0.719467	0.481184	0.880233	0.212105	0.674038	0.79079	0.719395	0.688042	0.700144	0.76738	0.679833	0.652833	0.727739	0.637663	0.729069	0.703237	0.227389
SAMa1871f491b02	0.679404	0.518241	0.500253	0.639555	0.449384	0.934188	0.508149	0.706802	0.820937	0.743231	0.665946	0.689427	0.724542	0.716571	0.614756	0.646556	0.5607	0.753343	0.770833	0.545212
SAM30cf07d4874f	0.85618	0.793392	0.820423	0.824888	0.667833	0.93175	0.641832	0.632936	0.820695	0.758865	0.717656	0.690752	0.723989	0.730035	0.674345	0.751058	0.63669	0.77778	0.776924	0.672667
SAMd135d5867fe3	0.798921	0.723272	0.772307	0.826675	0.586863	0.952507	0.58502	0.732814	0.884537	0.794567	0.708402	0.68792	0.718928	0.744801	0.644759	0.743606	0.624778	0.792857	0.787818	0.644191
SAM9e11ec6bea80	0.777904	0.642593	0.762366	0.778924	0.475744	0.983619	0.747912	0.68924	0.877924	0.789395	0.705153	0.685224	0.716422	0.75786	0.664344	0.726275	0.630215	0.77021	0.806069	0.818773
SAM065890737112	0.659607	0.519196	0.500764	0.664697	0.443649	0.974732	0.638374	0.692026	0.840219	0.756813	0.670145	0.666433	0.730156	0.726165	0.649595	0.643624	0.584011	0.731091	0.784634	0.701816
SAMb470eb8f04be	0.810006	0.679124	0.64011	0.778093	0.531151	0.947689	0.550303	0.731879	0.865232	0.758866	0.692398	0.671807	0.735296	0.710206	0.676351	0.716494	0.58865	0.74187	0.768448	0.582227
SAM675a12a09c15	0.793401	0.750259	0.759902	0.831177	0.490024	0.854787	0.314788	0.603034	0.76246	0.701854	0.689353	0.681193	0.729237	0.673053	0.685267	0.751954	0.607573	0.725172	0.706097	0.351598
SAM1e9c4d1d39ae	0.743309	0.57634	0.600852	0.700167	0.520813	0.966697	0.577759	0.74625	0.869425	0.775269	0.675113	0.65602	0.738664	0.713921	0.648465	0.688652	0.60114	0.723921	0.757875	0.621124
SAM5a2347c0498a	0.671219	0.542158	0.622981	0.679505	0.466041	0.916632	0.432432	0.702366	0.850261	0.746964	0.669558	0.695011	0.708868	0.721221	0.638634	0.675268	0.588182	0.710139	0.733867	0.453002
SAM0571f17f4045	0.761762	0.560597	0.652157	0.70198	0.487779	0.978022	0.782308	0.703908	0.863161	0.782634	0.694155	0.693406	0.735633	0.763982	0.626866	0.657874	0.62786	0.771413	0.804794	0.842874
SAM4b7ea015fd9e	0.754303	0.457284	0.532168	0.665636	0.442321	0.79169	0.275717	0.676959	0.795991	0.712598	0.65763	0.678633	0.729721	0.691461	0.652044	0.624408	0.568792	0.72409	0.715615	0.334512
SAM9306c5c92444	0.683419	0.579465	0.60167	0.668264	0.48185	0.954844	0.599821	0.75134	0.867852	0.76876	0.676925	0.68365	0.727267	0.739937	0.642936	0.674776	0.591215	0.760174	0.782797	0.660287
SAMb15ac6e4c4ef	0.731102	0.617099	0.581731	0.737864	0.556024	0.975464	0.633874	0.688428	0.803798	0.723449	0.667531	0.680535	0.73425	0.724442	0.64499	0.707166	0.588976	0.734417	0.768312	0.708948
SAM28e6031ac18b	0.720782	0.596357	0.55384	0.699627	0.460622	0.898935	0.315244	0.665498	0.81631	0.724656	0.664866	0.683	0.729418	0.6898	0.666328	0.661338	0.542267	0.71939	0.743601	0.320196
SAMd86389d0d768	0.693134	0.577209	0.575013	0.73984	0.462387	0.853159	0.416107	0.640591	0.778929	0.703946	0.678526	0.689761	0.724023	0.715976	0.670135	0.682301	0.566976	0.725107	0.753452	0.418551
SAM63b2189c36d7	0.748733	0.600719	0.627048	0.717248	0.512665	0.847378	0.353477	0.669502	0.814473	0.739346	0.681264	0.674165	0.731247	0.697965	0.648907	0.676515	0.578904	0.716374	0.729763	0.35925
SAM18be5b395318	0.722328	0.592481	0.598887	0.744644	0.437906	0.908191	0.577559	0.73937	0.865361	0.764974	0.660039	0.675565	0.696201	0.713301	0.651674	0.684084	0.591702	0.759097	0.780188	0.643798
SAM0d855cff64e6	0.728692	0.577255	0.571019	0.713131	0.423489	0.960672	0.489362	0.707414	0.881805	0.771836	0.67323	0.686038	0.708593	0.717103	0.642989	0.686211	0.578991	0.745303	0.779177	0.527416
SAM6cbc10abddb0	0.784747	0.61999	0.709051	0.721091	0.459961	0.924141	0.710946	0.693541	0.86	0.78208	0.687448	0.673983	0.69999	0.727476	0.653946	0.692108	0.598842	0.767125	0.801424	0.789854
SAMdee1011782cd	0.853648	0.72113	0.736665	0.848739	0.623175	0.970351	0.686317	0.562747	0.741652	0.706335	0.693602	0.688917	0.729577	0.735803	0.684066	0.75893	0.6384	0.772911	0.767158	0.758986
SAMe9475f77504b	0.867861	0.717974	0.781041	0.82721	0.564789	0.906435	0.652262	0.672432	0.833318	0.770358	0.701349	0.684328	0.700981	0.71665	0.672365	0.760354	0.609973	0.775809	0.762849	0.730272
SAMa535fcdf18a0	0.805372	0.68527	0.647558	0.818095	0.557565	0.87921	0.533697	0.766235	0.875022	0.77718	0.694912	0.668831	0.721307	0.712986	0.665416	0.727276	0.597715	0.74672	0.777822	0.577566
SAM548551ef782c	0.709188	0.604281	0.588771	0.755288	0.441531	0.8617	0.394477	0.733654	0.888836	0.794211	0.690989	0.682918	0.719527	0.72083	0.650233	0.690531	0.604292	0.748727	0.771584	0.420246
SAM203dcf14f927	0.779297	0.660703	0.692441	0.753277	0.501246	0.971277	0.781711	0.704487	0.855562	0.771844	0.69243	0.673792	0.727935	0.754385	0.652157	0.709731	0.62116	0.766144	0.787797	0.850384
SAMe41b1e773582	0.783337	0.652758	0.653635	0.766887	0.495915	0.980429	0.594183	0.719115	0.870032	0.765133	0.695403	0.678918	0.740358	0.718916	0.675895	0.731259	0.610068	0.739777	0.770209	0.619357
SAM978a587b207e	0.831911	0.738116	0.706502	0.803438	0.547467	0.967414	0.61781	0.675464	0.845742	0.773685	0.714605	0.681119	0.744396	0.739557	0.66989	0.759892	0.631373	0.769192	0.779815	0.678321
SAM5234688806a7	0.744631	0.603194	0.640326	0.74519	0.501396	0.929919	0.326484	0.651177	0.810316	0.712221	0.68502	0.681502	0.744675	0.689101	0.623726	0.678209	0.567578	0.728679	0.735885	0.422575
SAM2c9586161ce6	0.678234	0.531673	0.535506	0.688595	0.485951	0.82726	0.382949	0.734967	0.865875	0.767499	0.685198	0.679098	0.723185	0.702643	0.633106	0.643513	0.576176	0.731936	0.748954	0.405784
SAM76a431ba6ce1	0.843205	0.735771	0.783167	0.834479	0.451379	0.939683	0.530387	0.622529	0.795119	0.740104	0.707009	0.698248	0.721127	0.701459	0.663714	0.764446	0.639768	0.783569	0.752387	0.573552
SAM8f2275c36e8c	0.735498	0.64353	0.666186	0.75818	0.436451	0.905805	0.383498	0.700601	0.825499	0.738325	0.682048	0.705632	0.724488	0.708743	0.662862	0.705473	0.596777	0.739245	0.764198	0.405162
SAMab8052a03398	0.811447	0.804166	0.718737	0.82646	0.685117	0.966256	0.679444	0.567526	0.764479	0.737326	0.710291	0.697379	0.726903	0.750999	0.688917	0.7635	0.651269	0.800296	0.794733	0.73107
SAMd3bd67996035	0.804816	0.65552	0.702206	0.783152	0.524255	0.935628	0.6934	0.669858	0.846049	0.765063	0.674307	0.684176	0.741807	0.742516	0.653699	0.690521	0.610296	0.755469	0.787135	0.766822
SAM753d4bb52dbe	0.81675	0.717692	0.657267	0.816574	0.54457	0.910442	0.569275	0.697032	0.847503	0.775676	0.696955	0.678705	0.738054	0.72448	0.688622	0.744233	0.637327	0.759005	0.785449	0.600338
SAMd3601288319e	0.782287	0.628687	0.724587	0.765136	0.498802	0.934009	0.725344	0.707016	0.869564	0.779781	0.694537	0.693143	0.714617	0.741669	0.678252	0.709531	0.607309	0.755424	0.78416	0.802906
SAM59f392864f5d	0.840103	0.683678	0.813875	0.83069	0.562974	0.942121	0.699293	0.686396	0.839864	0.770294	0.709537	0.679648	0.701652	0.724404	0.670063	0.736169	0.628017	0.776949	0.769855	0.771778
SAM26104d5adc89	0.826595	0.738529	0.715824	0.852937	0.546401	0.876131	0.36609	0.676635	0.817544	0.745246	0.724721	0.68921	0.738357	0.702678	0.689826	0.777218	0.638619	0.768114	0.742579	0.384834
SAMba1a34b5a060	0.813583	0.746562	0.716141	0.805828	0.595438	0.959361	0.61021	0.689503	0.852357	0.767858	0.704353	0.694293	0.736152	0.72266	0.679296	0.760284	0.622231	0.758762	0.769446	0.663107
SAM18a4dabbc557	0.688009	0.525623	0.597283	0.734898	0.482973	0.94195	0.673718	0.689388	0.85699	0.782717	0.696547	0.680313	0.722696	0.758164	0.632187	0.660725	0.620041	0.779943	0.808515	0.735196
SAMfb7aec7cb0e2	0.773191	0.660438	0.729755	0.761984	0.4914	0.982791	0.730207	0.739183	0.873539	0.777588	0.672419	0.67764	0.700366	0.751423	0.629634	0.723277	0.588183	0.780778	0.786549	0.804936
SAMfed609955db9	0.831815	0.716608	0.745571	0.813636	0.536843	0.871077	0.415085	0.715344	0.848236	0.761864	0.68941	0.675563	0.725281	0.701782	0.683999	0.747751	0.606582	0.749146	0.750983	0.430731
SAMb8070b7937e7	0.72701	0.651566	0.609715	0.723832	0.480692	0.888658	0.382316	0.657578	0.771871	0.705776	0.68088	0.675545	0.725292	0.688001	0.663175	0.695709	0.604664	0.739839	0.740813	0.40723
SAMf2aae1443f67	0.741729	0.596048	0.543244	0.728249	0.466528	0.921575	0.476163	0.674927	0.816382	0.724078	0.681345	0.682301	0.755344	0.702382	0.665594	0.705879	0.590372	0.725165	0.749821	0.511436
SAM2bba8cb35e48	0.883281	0.762552	0.792525	0.851271	0.519003	0.888875	0.479098	0.631916	0.824071	0.755459	0.698375	0.688186	0.725474	0.68778	0.680359	0.75184	0.628903	0.758919	0.740056	0.509353
SAM5c139c5c1c4f	0.83174	0.658152	0.694975	0.759004	0.484697	0.938077	0.555159	0.708893	0.84881	0.753109	0.68299	0.674966	0.722368	0.713194	0.632409	0.720935	0.584728	0.755951	0.765474	0.608671
SAMc1251c7bfee2	0.706021	0.584661	0.546603	0.771262	0.462065	0.897921	0.592291	0.717448	0.886542	0.782786	0.681675	0.662881	0.721183	0.738958	0.628878	0.705183	0.602945	0.769578	0.791785	0.661039
SAM6780ed436b55	0.803415	0.71563	0.729229	0.809548	0.472268	0.974116	0.67163	0.75045	0.890573	0.781567	0.690283	0.680719	0.736554	0.736614	0.677162	0.729905	0.607146	0.748541	0.789724	0.743227
SAM85f0a3ac1c45	0.731948	0.576288	0.578984	0.774954	0.42241	0.850601	0.286895	0.706504	0.857455	0.762842	0.69218	0.692171	0.730779	0.68633	0.672643	0.681834	0.609221	0.729803	0.734896	0.292248
SAM9d2494119c05	0.737094	0.622907	0.560066	0.743164	0.490041	0.881572	0.36547	0.700467	0.851411	0.739822	0.662954	0.666724	0.709711	0.676708	0.657146	0.712653	0.568457	0.708282	0.732205	0.387915
SAM9410b866974a	0.863538	0.76962	0.760724	0.806098	0.643401	0.954383	0.580181	0.673442	0.810406	0.755222	0.697169	0.702911	0.742874	0.738375	0.676358	0.745503	0.624519	0.777369	0.773799	0.63403
SAM5d989c86255e	0.827974	0.708634	0.710366	0.834488	0.511419	0.905973	0.490009	0.708946	0.854116	0.778653	0.686596	0.670791	0.72504	0.706826	0.693891	0.726631	0.612594	0.764265	0.763853	0.516921
SAM27299aed7681	0.721053	0.571934	0.491611	0.723199	0.452436	0.86896	0.480371	0.716285	0.844062	0.76406	0.712327	0.680915	0.719437	0.715197	0.683337	0.68234	0.626297	0.750065	0.764019	0.529045
SAM49d48750e294	0.866864	0.797034	0.797633	0.866799	0.523142	0.890285	0.416125	0.598334	0.778321	0.720342	0.707594	0.691746	0.742303	0.708082	0.693866	0.764697	0.634709	0.769942	0.759254	0.438939
SAMd43f8933066b	0.827587	0.716051	0.760034	0.833393	0.549744	0.963474	0.746485	0.648284	0.80207	0.743471	0.701272	0.6781	0.726132	0.73886	0.664979	0.73899	0.618385	0.76429	0.775951	0.819808
SAM7aa01fc49a80	0.873427	0.735782	0.833011	0.839061	0.693475	0.929694	0.630598	0.629046	0.789936	0.729563	0.719268	0.688106	0.725824	0.727515	0.697206	0.757803	0.62936	0.767585	0.767639	0.675054
SAM0257bbbbd388	0.718428	0.593698	0.639691	0.721813	0.515695	0.917981	0.52768	0.73012	0.841363	0.76123	0.676657	0.677672	0.725853	0.716582	0.650017	0.690556	0.624628	0.74739	0.757361	0.554127
SAMc919aebc7fdd	0.805767	0.697826	0.725598	0.79428	0.510786	0.960488	0.691555	0.642673	0.805076	0.731683	0.674302	0.678729	0.703604	0.722941	0.662566	0.731596	0.582108	0.742271	0.762056	0.773241
SAMa321770ac31c	0.797656	0.673617	0.734034	0.741067	0.424565	0.946297	0.567738	0.739196	0.857803	0.768158	0.670178	0.687241	0.730072	0.710414	0.631363	0.72374	0.598766	0.713901	0.754634	0.629525
SAM3894ac3956a5	0.818513	0.715868	0.707831	0.808188	0.546149	0.904475	0.530363	0.651357	0.800903	0.729479	0.69999	0.688187	0.734424	0.718814	0.681865	0.761272	0.630623	0.75672	0.767581	0.557119
SAM1c0ecfb3eb63	0.85608	0.78132	0.776247	0.861427	0.553652	0.973138	0.655777	0.710234	0.849298	0.769409	0.710144	0.680018	0.730934	0.722868	0.678905	0.775657	0.638078	0.764414	0.772057	0.735767
SAMbcb07ba81cee	0.829574	0.662119	0.71294	0.760763	0.519949	0.967839	0.586835	0.685654	0.848274	0.765443	0.680839	0.671746	0.704789	0.686499	0.639887	0.708992	0.586023	0.742326	0.734327	0.662952
SAM9aa6a095a9d6	0.828591	0.697477	0.716965	0.800909	0.564545	0.942863	0.540717	0.669462	0.812386	0.743637	0.692149	0.693263	0.741878	0.709009	0.666579	0.753204	0.626747	0.740928	0.755369	0.568657
SAM957378bd907f	0.799367	0.550798	0.700795	0.731322	0.599239	0.965656	0.737831	0.630895	0.808928	0.747802	0.698431	0.691205	0.739234	0.764078	0.632741	0.689537	0.639241	0.773215	0.804814	0.791713
SAMf82bbdc267c8	0.754022	0.550081	0.588076	0.767913	0.532769	0.832188	0.32266	0.674551	0.833566	0.744586	0.694014	0.672868	0.746246	0.700908	0.674352	0.688449	0.576803	0.743313	0.726747	0.333816
SAM2624229effe8	0.876803	0.778538	0.768571	0.871237	0.628738	0.905779	0.513742	0.574265	0.755934	0.713026	0.720771	0.689795	0.745126	0.718964	0.715515	0.778417	0.640746	0.769323	0.757464	0.595826
SAMd2492b2a31bb	0.885903	0.824905	0.79378	0.871131	0.523081	0.946131	0.607244	0.65212	0.828982	0.765528	0.714248	0.685152	0.747598	0.733933	0.685806	0.777005	0.633529	0.797226	0.785252	0.685486
SAM670649e105b5	0.815192	0.78074	0.736591	0.864179	0.485756	0.922533	0.585643	0.69202	0.843195	0.764316	0.695175	0.685924	0.741057	0.715414	0.693097	0.742395	0.620193	0.765957	0.771764	0.663452
SAM91c47b054ffb	0.727774	0.618366	0.576026	0.76776	0.476253	0.949582	0.660768	0.777435	0.894472	0.775599	0.676359	0.684575	0.726695	0.737299	0.644787	0.69212	0.595535	0.737177	0.769305	0.7416
SAM5fe7a81a39dd	0.792776	0.635607	0.677719	0.776325	0.552561	0.926736	0.675521	0.708282	0.849439	0.754673	0.682223	0.675165	0.73325	0.726608	0.655606	0.698685	0.593957	0.744846	0.762658	0.744886
SAM29da928587ad	0.801631	0.690995	0.738361	0.795706	0.467235	0.920042	0.479823	0.661198	0.807854	0.737789	0.701983	0.675417	0.758238	0.71526	0.677241	0.766075	0.631023	0.755446	0.75545	0.509023
SAM0a0f2bac4b20	0.833613	0.707107	0.76309	0.823299	0.460052	0.916285	0.590597	0.713813	0.861817	0.77844	0.70002	0.686486	0.712618	0.720637	0.659943	0.74843	0.616313	0.78195	0.777411	0.647908
SAM8e469834acc1	0.825552	0.757265	0.701823	0.841481	0.567805	0.901338	0.45907	0.608231	0.761206	0.705736	0.701837	0.687706	0.737314	0.698458	0.68461	0.760998	0.64386	0.752572	0.73494	0.504604
SAM12502d970c10	0.78559	0.636071	0.696458	0.813244	0.598395	0.920783	0.426614	0.654869	0.834619	0.750048	0.692796	0.682803	0.745214	0.691257	0.67188	0.74033	0.607497	0.745566	0.738351	0.448934
SAM7d7c54623618	0.824556	0.55314	0.712494	0.764346	0.553021	0.878529	0.45672	0.763728	0.909131	0.797036	0.671619	0.683947	0.738077	0.693559	0.674451	0.721031	0.617886	0.726445	0.743467	0.499914
SAM181b638b8248	0.854122	0.748741	0.79585	0.813205	0.563314	0.938662	0.685336	0.617446	0.793577	0.743043	0.714093	0.688836	0.734327	0.745141	0.680653	0.780535	0.652822	0.798961	0.789125	0.739116
SAMbfdffb97c446	0.823216	0.717947	0.725229	0.818621	0.524651	0.939736	0.66397	0.710266	0.85901	0.775583	0.698876	0.677417	0.739854	0.739435	0.676384	0.753708	0.627279	0.774867	0.794448	0.733273
SAM3b15b4c6311d	0.79284	0.729604	0.669272	0.812333	0.442695	0.980525	0.739437	0.710299	0.87188	0.791601	0.709482	0.682354	0.719282	0.744281	0.676155	0.731478	0.628764	0.776637	0.806274	0.818528
SAM1c8b086175ca	0.874616	0.789165	0.798171	0.890079	0.611596	0.915104	0.530063	0.609627	0.780603	0.731132	0.719513	0.688417	0.735061	0.718214	0.703783	0.775981	0.637355	0.780469	0.769494	0.552107
SAMeaa477a5384b	0.784336	0.623621	0.600131	0.68455	0.492357	0.986289	0.731341	0.705928	0.847328	0.756533	0.664292	0.668575	0.734261	0.717505	0.633658	0.665378	0.581422	0.730103	0.770961	0.80045
SAM1dda30f1c5be	0.868993	0.813701	0.720977	0.86018	0.707439	0.931266	0.529414	0.671912	0.801512	0.74371	0.711471	0.675155	0.751122	0.721571	0.700199	0.765147	0.635758	0.775784	0.769592	0.607182
SAM9daccafc18db	0.883739	0.780248	0.752895	0.838212	0.526961	0.901388	0.458944	0.659743	0.835548	0.770463	0.710567	0.676757	0.74546	0.710408	0.678462	0.739732	0.64251	0.765754	0.756305	0.509237
SAM2eb07dedf07f	0.852158	0.742042	0.700997	0.817747	0.6106	0.961065	0.775262	0.620614	0.808954	0.751213	0.695655	0.689309	0.714985	0.740631	0.659789	0.745653	0.606488	0.782571	0.794279	0.843331
SAM25510f300d79	0.802029	0.773079	0.591809	0.785873	0.418954	0.909966	0.348117	0.668578	0.851439	0.76695	0.691549	0.671294	0.730782	0.716337	0.630602	0.724967	0.615898	0.787466	0.77003	0.379599
SAMbda79f955628	0.82971	0.708405	0.712924	0.824955	0.553358	0.970737	0.842856	0.648503	0.842638	0.749328	0.682115	0.677457	0.734966	0.733187	0.65291	0.701337	0.604374	0.752283	0.781374	0.908263
SAM187e056d6a2a	0.812756	0.726618	0.715586	0.829347	0.44733	0.956704	0.366378	0.67037	0.809739	0.737061	0.701767	0.698962	0.758206	0.677407	0.687108	0.760166	0.632559	0.75185	0.717178	0.385859
SAMbc8dc3a7b54e	0.63521	0.511341	0.626937	0.672787	0.509006	0.917962	0.279972	0.746333	0.88274	0.787473	0.693798	0.68887	0.744604	0.713666	0.623112	0.675478	0.606903	0.747585	0.732229	0.304986
SAM7b40007f4aa4	0.715036	0.576627	0.671681	0.697946	0.435469	0.95082	0.317216	0.738313	0.8874	0.779707	0.692225	0.680382	0.754041	0.687864	0.648164	0.721898	0.60852	0.707656	0.736199	0.33042
SAM568ce160abd9	0.848182	0.678514	0.75131	0.841776	0.730825	0.94699	0.412615	0.517778	0.709365	0.685706	0.725293	0.688205	0.741464	0.708964	0.681439	0.760002	0.648009	0.793773	0.737174	0.420515
SAM14938611a2d3	0.711371	0.584927	0.66978	0.752062	0.504656	0.994296	0.567595	0.69336	0.835161	0.760365	0.683954	0.67188	0.727758	0.727844	0.669504	0.70875	0.613732	0.75217	0.762968	0.631089
SAM1a87df750b9d	0.840675	0.699096	0.743725	0.752737	0.518959	0.989421	0.649777	0.775842	0.889818	0.78264	0.687294	0.666798	0.724729	0.722855	0.662926	0.738098	0.595058	0.765189	0.771526	0.705029
SAMae02629a97f7	0.756424	0.633036	0.645561	0.751882	0.552443	0.965313	0.341938	0.700964	0.845541	0.746164	0.683854	0.680469	0.76058	0.6671	0.653717	0.710221	0.591224	0.716747	0.710619	0.340185
SAM47fc46c3d6be	0.81649	0.682086	0.800543	0.796242	0.524354	0.998801	0.720976	0.663237	0.85115	0.778661	0.714408	0.68966	0.739079	0.758837	0.649237	0.74615	0.631345	0.799823	0.807328	0.799313
SAM7829a341b9f3	0.771968	0.567788	0.65699	0.758509	0.46418	0.98807	0.560597	0.716265	0.84974	0.764992	0.683975	0.67912	0.723521	0.72307	0.640627	0.715945	0.605492	0.746802	0.775969	0.610432
SAM0f956e757453	0.823185	0.727116	0.768343	0.827346	0.623912	0.947027	0.488648	0.623995	0.79472	0.74293	0.702258	0.687357	0.75359	0.711479	0.679353	0.758388	0.622929	0.754926	0.743757	0.533497
SAMaf42c1541269	0.81165	0.69686	0.737455	0.804983	0.456804	0.983245	0.793962	0.689467	0.853878	0.775365	0.706492	0.67474	0.73779	0.744527	0.658349	0.732804	0.626905	0.780925	0.789316	0.860528
SAM09c84ec0cf34	0.81003	0.737711	0.667785	0.82096	0.426696	0.9479	0	0.599362	0.784786	0.722825	0.692911	0.69655	0.736361	0.677574	0.659998	0.743832	0.615784	0.742447	0.731936	0.0683581
SAM7538ad9ff524	0.734661	0.640658	0.583357	0.72517	0.48548	0.985925	0.567258	0.687128	0.813126	0.729711	0.665859	0.673656	0.739193	0.73416	0.631738	0.707052	0.599012	0.746644	0.781159	0.617493
SAMb2e4a082541a	0.787267	0.584705	0.732003	0.813839	0.567658	0.994661	0.711211	0.563601	0.74995	0.715687	0.713925	0.7021	0.74869	0.787675	0.6503	0.686186	0.656278	0.785338	0.816162	0.762398
SAM771445e92421	0.862203	0.74833	0.777895	0.841243	0.548825	0.986451	0.642689	0.615166	0.773838	0.707616	0.708826	0.679143	0.742828	0.730558	0.688974	0.762144	0.622121	0.764042	0.770539	0.725521
SAM59fda9035d1d	0.889812	0.839981	0.832185	0.92197	0.583705	0.974038	0.385107	0.581509	0.781155	0.741381	0.729483	0.693354	0.75608	0.708553	0.682223	0.776094	0.662917	0.791938	0.746856	0.413629
SAM727c0e92a2a7	0.786132	0.609206	0.647101	0.765406	0.541992	0.997661	0.773031	0.703879	0.84881	0.77127	0.689106	0.681867	0.729834	0.746542	0.651067	0.712356	0.633853	0.765627	0.785369	0.844002
SAM6f2a102a99df	0.806514	0.6973	0.677704	0.797999	0.613159	0.994841	0.734197	0.690831	0.833989	0.77744	0.704491	0.68531	0.73484	0.747842	0.650378	0.73748	0.640167	0.780856	0.794672	0.807761
SAMe56c96c51190	0.875811	0.723424	0.799801	0.826002	0.560268	0.984257	0.70804	0.626917	0.803236	0.746404	0.711074	0.69493	0.742129	0.751863	0.670613	0.774634	0.667165	0.801803	0.795958	0.760819
SAM2b672f4336c7	0.695317	0.599157	0.541337	0.804235	0.524719	0.939483	0.445133	0.669967	0.82202	0.749643	0.699593	0.679776	0.745049	0.713927	0.635481	0.735561	0.621	0.757913	0.743691	0.479526
SAM1ab1b28d9f2b	0.794589	0.635402	0.664975	0.795041	0.493269	0.95844	0.453306	0.742432	0.8675	0.770825	0.685165	0.682463	0.724745	0.721649	0.647008	0.724121	0.576288	0.751402	0.764081	0.479804
SAM6662f5181f87	0.808055	0.733013	0.668657	0.82554	0.4719	0.97852	0.606694	0.628931	0.810218	0.741238	0.70483	0.680635	0.735932	0.724257	0.694788	0.745771	0.628223	0.7636	0.775707	0.672678
SAMe0c49ea0df5d	0.83166	0.775523	0.687638	0.840709	0.543272	0.969023	0.540105	0.674292	0.798494	0.735159	0.696541	0.687941	0.764535	0.71008	0.676443	0.767499	0.635154	0.755543	0.752051	0.600551
SAM18b9351e265a	0.803416	0.664534	0.805353	0.804655	0.554558	0.993458	0.716039	0.708079	0.869968	0.783432	0.695246	0.671393	0.733283	0.725368	0.686638	0.742646	0.634083	0.764129	0.77034	0.783151
SAM7fb7a13c096b	0.80813	0.690011	0.716494	0.804011	0.60967	0.98115	0.48474	0.669577	0.818255	0.73581	0.704203	0.695096	0.75993	0.726343	0.658216	0.765488	0.637921	0.746962	0.757508	0.518252
SAM87a8e18eb45b	0.717797	0.543591	0.485436	0.731512	0.49243	0.9493	0.370523	0.728158	0.855165	0.745349	0.674724	0.672079	0.739548	0.681024	0.626353	0.670083	0.592887	0.715738	0.72867	0.394005
SAM9725303dce0c	0.666231	0.564652	0.600551	0.665995	0.534259	0.966803	0.419964	0.704205	0.836252	0.747929	0.665032	0.667593	0.737837	0.687259	0.631508	0.688951	0.578153	0.72534	0.729014	0.453227
SAM6ff654a20f98	0.808965	0.689989	0.726822	0.847775	0.584576	0.951329	0.470988	0.601946	0.799402	0.735106	0.71049	0.689041	0.747375	0.700129	0.687499	0.771782	0.6297	0.75709	0.74191	0.511662
SAM65afda25b920	0.88314	0.801515	0.800119	0.866027	0.702012	0.983373	0.706479	0.625817	0.80428	0.744524	0.701631	0.702151	0.721288	0.720616	0.652379	0.782553	0.610548	0.785652	0.769152	0.764868
SAMef0e3d2415fd	0.832278	0.707141	0.730243	0.80067	0.695222	1	0.829619	0.551763	0.754484	0.715669	0.71033	0.699502	0.743299	0.759003	0.67197	0.757142	0.652099	0.786295	0.801441	0.882801
SAM07a93a28f801	0.762057	0.651408	0.625806	0.771209	0.599623	0.945039	0.418405	0.699675	0.837085	0.762192	0.708158	0.675933	0.761611	0.694764	0.663135	0.727018	0.619784	0.755782	0.741388	0.43289
SAM94859b440b1d	0.750878	0.602199	0.631776	0.748897	0.458172	0.930635	0.406113	0.643825	0.800195	0.718089	0.690307	0.677675	0.758629	0.712679	0.64704	0.716047	0.610147	0.736369	0.753425	0.395839
SAM58e7832f4e7d	0.736556	0.573545	0.491696	0.710853	0.557172	0.93111	0.236458	0.574801	0.724617	0.692638	0.697909	0.69001	0.755123	0.704776	0.630451	0.659711	0.591923	0.715802	0.739304	0.236524
SAMc57eadb2d82b	0.684478	0.518867	0.518764	0.728379	0.497335	0.959262	0.185999	0.688965	0.836949	0.750963	0.691153	0.686038	0.748492	0.684524	0.641292	0.663417	0.562834	0.731651	0.742277	0.246468
SAM5767dd75d142	0.720946	0.634974	0.704642	0.766814	0.477734	0.976563	0.599186	0.693196	0.850977	0.761322	0.68689	0.680226	0.757343	0.711442	0.65262	0.715132	0.622346	0.751945	0.745956	0.67709
SAMaabf4afe4213	0.771676	0.598902	0.646482	0.776699	0.536308	0.90755	0.536655	0.672007	0.862091	0.768442	0.697066	0.673988	0.765971	0.74205	0.658216	0.698257	0.59463	0.74801	0.782	0.594284
SAMcc7a42d87e9c	0.729989	0.662785	0.625348	0.807348	0.471583	0.996343	0.607977	0.670294	0.835499	0.738479	0.679156	0.670161	0.757189	0.709198	0.65457	0.712653	0.597446	0.733319	0.756346	0.66875
SAMce39dd79b441	0.798163	0.630245	0.689768	0.733608	0.469445	0.986049	0.524041	0.69339	0.872096	0.778413	0.693435	0.676858	0.72949	0.712587	0.652274	0.707365	0.590489	0.767562	0.767464	0.634622
SAM75f12d1a55fc	0.821789	0.682494	0.776889	0.802181	0.629296	0.993403	0.690151	0.606674	0.791364	0.749054	0.695709	0.682498	0.741318	0.736204	0.671694	0.765356	0.641992	0.775797	0.774406	0.738433
SAM6964a6d7b967	0.617996	0.509811	0.566041	0.722411	0.444708	0.907105	0.319256	0.737478	0.857307	0.763705	0.67773	0.687942	0.744286	0.710228	0.632927	0.676997	0.616724	0.753837	0.725022	0.334011
SAM3b1066e5801b	0.835143	0.585421	0.745078	0.801509	0.61922	0.983189	0.624088	0.625222	0.797776	0.752546	0.728748	0.701133	0.74343	0.75341	0.650034	0.697381	0.649262	0.785498	0.786796	0.677268
SAMf20b827dca51	0.825499	0.69526	0.747884	0.828012	0.677989	0.984738	0.758509	0.615625	0.807979	0.747021	0.710418	0.685752	0.755132	0.750778	0.660271	0.750955	0.645176	0.784786	0.7892	0.816188
SAM6792d6e98068	0.705036	0.51127	0.570909	0.697747	0.48044	0.946911	0.315324	0.634018	0.790951	0.710513	0.671654	0.667912	0.743686	0.695606	0.639777	0.680038	0.578158	0.74094	0.736832	0.32739
SAM31d9176e11fb	0.763617	0.64842	0.654211	0.805464	0.461403	0.978367	0.728055	0.710307	0.864416	0.752907	0.678173	0.680622	0.748325	0.723905	0.637462	0.739271	0.59344	0.743084	0.758561	0.796494
SAM5cc2d9036053	0.860687	0.722673	0.734744	0.857161	0.869442	0.965853	0.370237	0.595813	0.774161	0.729028	0.745942	0.698072	0.776724	0.691342	0.692014	0.755287	0.665266	0.770748	0.727715	0.378008
SAMb8101c538753	0.786073	0.668922	0.635402	0.80442	0.258781	0.99536	0.691245	0.713555	0.868455	0.779523	0.714568	0.669851	0.728925	0.71169	0.65269	0.734028	0.636293	0.757022	0.763544	0.766039
SAM80c6183220e6	0.841209	0.707124	0.742205	0.800646	0.484401	0.996695	0.687564	0.69397	0.849133	0.77392	0.705056	0.688407	0.741975	0.745452	0.650833	0.738446	0.612127	0.783998	0.792063	0.773449
SAM572f19794c96	0.763562	0.655328	0.583529	0.786043	0.502322	0.972597	0.603443	0.692557	0.871153	0.770492	0.676307	0.70181	0.739552	0.70931	0.673399	0.739423	0.579744	0.755868	0.761391	0.642177
SAM1abf01dd4544	0.810181	0.654354	0.763492	0.790102	0.517032	0.962939	0.615129	0.71084	0.837156	0.766765	0.686195	0.673911	0.71294	0.728344	0.651062	0.727152	0.613133	0.778674	0.779735	0.644091
SAM1f83ebd6be9b	0.757641	0.59676	0.612006	0.730176	0.421423	0.954811	0.385136	0.68044	0.84299	0.733416	0.680078	0.6717	0.717082	0.686023	0.660456	0.66558	0.552838	0.736251	0.735191	0.39793
SAM1f66db567eb5	0.848987	0.790494	0.77595	0.83345	0.542245	0.992656	0.680452	0.70254	0.863063	0.786273	0.706448	0.678298	0.737626	0.73192	0.651511	0.77288	0.627526	0.781355	0.778971	0.752227
SAM6157c8f38b72	0.850274	0.734414	0.729733	0.870469	0.593913	0.976002	0.562843	0.675425	0.819455	0.736156	0.701444	0.678102	0.742652	0.71036	0.701327	0.759072	0.632943	0.748299	0.750399	0.632567
SAMe7e4f7c076a7	0.854932	0.795489	0.799669	0.817809	0.460364	0.99147	0.753704	0.696978	0.853767	0.771227	0.716084	0.691337	0.74344	0.739113	0.668037	0.740309	0.607396	0.785809	0.789699	0.830476
SAM4caabd64e7fd	0.746215	0.650699	0.59862	0.743176	0.450723	0.950204	0.527335	0.661529	0.813688	0.712031	0.668664	0.684061	0.748458	0.70001	0.649062	0.692742	0.564411	0.725728	0.743926	0.575624
SAMc6eff056c89a	0.805713	0.684575	0.721307	0.760967	0.498132	0.974749	0.580057	0.627317	0.784508	0.714101	0.675217	0.672859	0.746071	0.716717	0.663776	0.730206	0.621049	0.746568	0.76356	0.615846
SAM5cfa1699bdb7	0.813953	0.721715	0.741923	0.842764	0.58171	0.975044	0.475284	0.621127	0.78876	0.726767	0.706004	0.673277	0.750206	0.673414	0.664227	0.77	0.626446	0.752897	0.717309	0.567038
SAMda4d892fddc8	0.761297	0.708728	0.734786	0.848163	0.540048	0.949405	0.587385	0.608311	0.79055	0.739631	0.692593	0.693999	0.738749	0.708705	0.663014	0.746659	0.640581	0.774751	0.757334	0.625942
SAM3a1c9632ff7b	0.753029	0.65583	0.589405	0.815059	0.499715	0.926071	0.434132	0.678023	0.830637	0.758904	0.712727	0.685416	0.76111	0.719364	0.683345	0.715297	0.613878	0.759283	0.765585	0.457492
SAM8b4b8b0f9e73	0.827314	0.724588	0.754163	0.828443	0.606125	0.972852	0.661732	0.587418	0.751169	0.710505	0.694748	0.689186	0.742566	0.738672	0.685496	0.76511	0.63212	0.77425	0.775034	0.714297
SAMe3d4266775a9	0.818877	0.725055	0.63469	0.783131	0.617556	0.95812	0.488397	0.664584	0.821774	0.747694	0.708718	0.658455	0.759872	0.714216	0.668814	0.732635	0.644499	0.746408	0.764035	0.511884
